# Supplementary material for: Identification of MYCN non-amplified neuroblastoma subgroups points towards molecular signatures for precision prognosis and therapy stratification
Source: Research Square preprint supplement (doi:10.21203/rs.3.rs-478917/v1), 2021-05-28
Supplement: Supplementary file 1 [file 3e0f5c171fd1902fe60e8229.docx]

Table S1. List of datasets collected for meta-analysis.

| **Dataset** | **Platform** | **Number of samples** | **AUROC** | **95% CI** |
| --- | --- | --- | --- | --- |
| GSE19274 | Illumina | 100 | 0.9 | 0.81 ~ 0.99 |
| GSE120572 | Agilent | 393 | 0.97 | 0.95 ~ 1 |
| GSE112447 | Agilent | 52 | 0.83 | 0.65 ~ 1 |
| GSE73517 | Agilent | 105 | 1 | 0.99 ~ 1 |
| GSE49710 | Agilent | 493 | 1 | 0.99 ~ 1 |
| GSE53371 | Agilent | 20 | 0.46 | 0.19 ~ 0.71 |
| GSE45547 | Agilent | 643 | 1 | 0.99 ~ 1 |
| GSE27608 | Agilent | 47 | 1 | 1 ~ 1 |
| GSE79910 | Agilent | 27 | 0.94 | 0.86 ~ 1 |
| GSE85047 | Affymetrix | 277 | 0.98 | 0.95 ~ 1 |
| GSE73537 | Affymetrix | 34 | 0.23 | 0.051 ~ 0.4 |
| GSE21713 | Affymetrix | 40 | 0.94 | 0.84 ~ 1 |
| GSE16237 | Affymetrix | 51 | 1 | 1 ~ 1 |
| GSE14880 | Affymetrix | 29 | 0.94 | 0.84 ~ 1 |
| GSE13136 | Affymetrix | 30 | 1 | 1 ~ 1 |
| GSE16476 | Affymetrix | 88 | 0.99 | 0.96 ~ 1 |
| E-MTAB-1781 | Agilent | 683 | 0.99 | 0.99 ~ 1 |
| E-MTAB-8248 | Agilent | 222 | 1 | 0.99 ~ 1 |
| E-MTAB-179 | Agilent | 477 | 0.99 | 0.98 ~ 1 |
| E-MEXP-3517 | Affymetrix | 42 | 0.9 | 0.77 ~ 1 |

AUROC: area under receiver operating characteristic (ROC) curve. 95% CI: 95% confidence interval.

Two datasets (GSE53371 and GSE73537, in grey) were removed due to low AUROC scores.
