# Supplementary material for: Identification of MYCN non-amplified neuroblastoma subgroups points towards molecular signatures for precision prognosis and therapy stratification
Source: Research Square preprint supplement (doi:10.21203/rs.3.rs-478917/v1), 2021-05-28
Supplement: Supplementary file 2 [file 4b4b02a920cef92689556e26.xlsx]

## Sheet: PPI network
Table S7. List of genes in PPI (protein–protein interaction) network analysis.
PPI-genes
MYCN
BIRC5
EXO1
CENPA
NUF2
DTL
PBK
NCAPG
UBE2C
ERCC6L
CDKN3
SPC25
KIF18A
CENPF
TYMS
E2F1
CEP55
MCM10
KIF20A
PTTG1
KIF15
TPX2
GINS2
CDCA8
ASPM
MELK
MAD2L1
MYBL2
FOXM1
AURKA
MKI67
KIF2C
CCNA2
FAM83D
FANCI
CDC6
HIST1H1B
CDCA2
NDC80
TTK
NEIL3
CKAP2L
ANLN
NUSAP1
TROAP
ZWINT
BLM
CENPE
CCNB1
KIF11
FAM64A
MND1
CHEK1
MCM2
BUB1
GTSE1
POLQ
TACC3
CENPN
CDC20
PLK1
BRIP1
CKS2
CDT1
HMMR
KIF14
ARHGAP11A
DEPDC1B
RNASEH2A
CHAF1A
PKMYT1
CENPK
CENPH
CASC5
UHRF1
CENPM
HMGB3
CDCA7
CENPO
HELLS
ODC1
UBE2T
TRIP13
PRC1
SMC4
FBXO5
CDC25A
PLK4
PCNA
ECT2
GSG2
MCM6
SGOL2
DIAPH3
DEPDC1
HIST1H2AL
BRCA2
SAAL1
KIAA0101
E2F2
SUV39H2
POLD1
CDCA4
XRCC2
RACGAP1
SMC2
CCNB2
SPAG5
ESPL1
E2F3
MYB
DBF4
ZNF367
TMEM97
TRAIP
STIL
GINS1
