# Supplementary material for: Identification of MYCN non-amplified neuroblastoma subgroups points towards molecular signatures for precision prognosis and therapy stratification
Source: Research Square preprint supplement (doi:10.21203/rs.3.rs-478917/v1), 2021-05-28
Supplement: Supplementary file 3 [file 4c714075cfc92b5723b27afd.xlsx]

## Sheet: DEGs
Table S4. DEGs (differentially expressed genes) in subgroups.
Gene	logFCsubgroup_1	FC_subgroup_1	AveExpr_subgroup_1	P.Value_subgroup_1	adj.P.Val_subgroup_1	logFCsubgroup_2	FC_subgroup_2	AveExpr_subgroup_2	P.Value_subgroup_2	adj.P.Val_subgroup_2	logFCsubgroup_3	FC_subgroup_3	AveExpr_subgroup_3	P.Value_subgroup_3	adj.P.Val_subgroup_3
PAGE5	-1.87612	0.272415	9.59118	1.93e-46	1.19e-45	2.27055	4.82507	9.59118	1.76e-42	1.4e-41	0.647484	1.56643	9.59118	5.49e-05	7.9e-05		DEGs: differentially expressed genes
MAGEA10	-1.57977	0.334534	7.51368	1.09e-59	1.06e-58	2.24021	4.72467	7.51368	3.66e-76	7.89e-75	0.253592	1.19217	7.51368	0.0344771	0.0417204		FC: fold change
CDCA5	-0.945408	0.519283	10.8279	8.18e-54	6.45e-53	2.21392	4.63934	10.8279	1.36e-221	1.31e-218	-0.623895	0.648917	10.8279	6.86e-17	1.52e-16		AveExpr: Average expression
BIRC5	-0.928371	0.525451	10.6662	7.62e-57	6.76e-56	2.08288	4.23652	10.6662	4.87e-212	2.57e-209	-0.531698	0.69174	10.6662	1.14e-13	2.27e-13		P.Value: P values
MUC15	-1.47689	0.359263	6.4528	1.49e-57	1.36e-56	2.04121	4.1159	6.4528	1.95e-69	3.52e-68	0.284251	1.21778	6.4528	0.0127018	0.0159312		adj.P.Value: adjusted P values
NEK2	-0.806502	0.571767	8.44857	8.78e-48	5.65e-47	2.03568	4.10015	8.44857	3.01e-232	4.97e-229	-0.662832	0.631637	8.44857	6.57e-23	1.72e-22
EXO1	-0.654475	0.635307	9.5584	2.87e-27	9.51e-27	2.0227	4.06344	9.5584	1.35e-188	3.56e-186	-0.867197	0.548211	9.5584	1.39e-33	4.81e-33
TK1	-0.935311	0.52293	12.7909	1.8e-54	1.46e-53	2.01167	4.03249	12.7909	3.14e-180	6.73e-178	-0.458594	0.727695	12.7909	5.23e-10	9.27e-10
CENPA	-0.806008	0.571962	8.78433	5.73e-48	3.71e-47	1.99173	3.97714	8.78433	2.16e-220	1.67e-217	-0.624503	0.648643	8.78433	1.49e-20	3.68e-20
NUF2	-0.517808	0.698432	10.8389	1.18e-15	2.69e-15	1.97262	3.9248	10.8389	6.12e-153	5.53e-151	-1.01679	0.494215	10.8389	4.94e-41	2.02e-40
DTL	-0.589661	0.664499	10.157	4.5e-20	1.19e-19	1.95863	3.88692	10.157	1.43e-151	1.24e-149	-0.902326	0.535023	10.157	1.51e-32	5.11e-32
PBK	-0.455529	0.729243	10.3855	3.8e-11	7.3e-11	1.92648	3.80127	10.3855	3.01e-125	1.69e-123	-1.06425	0.478222	10.3855	7.79e-40	3.1e-39
HIST1H1C	-1.5188	0.348977	10.8924	1.35e-162	4.74e-160	1.91257	3.7648	10.8924	5.84e-161	6.69e-159	0.458017	1.37365	10.8924	4.47e-10	7.93e-10
NCAPG	-0.696913	0.616891	10.2297	2.15e-31	8.14e-31	1.90274	3.73922	10.2297	1.85e-165	2.46e-163	-0.70038	0.61541	10.2297	1.47e-22	3.81e-22
UBE2C	-0.718951	0.607539	11.5225	3.02e-30	1.1e-29	1.90051	3.73346	11.5225	5.12e-146	3.95e-144	-0.667108	0.629768	11.5225	1.03e-18	2.4e-18
ERCC6L	-0.870312	0.547028	7.54416	1.28e-72	2.02e-71	1.89688	3.72408	7.54416	1.09e-269	1.26e-265	-0.448941	0.732581	7.54416	5.94e-14	1.2e-13
CDKN3	-0.900676	0.535636	10.039	9.92e-69	1.33e-67	1.88807	3.70139	10.039	4.87e-225	5.64e-222	-0.397992	0.758914	10.039	4.01e-10	7.13e-10
SPC25	-0.744166	0.597013	8.93082	1.42e-37	6.64e-37	1.87625	3.67121	8.93082	5.52e-170	8.64e-168	-0.609754	0.655309	8.93082	3.38e-18	7.77e-18
KIF18A	-0.673273	0.627082	8.05285	1.92e-36	8.61e-36	1.87515	3.6684	8.05285	4.91e-211	2.47e-208	-0.709448	0.611554	8.05285	1.38e-28	4.21e-28
CENPF	-0.548277	0.683836	10.0434	2.78e-19	7.17e-19	1.86332	3.63845	10.0434	3.77e-152	3.31e-150	-0.876443	0.544709	10.0434	5.09e-34	1.79e-33
TYMS	-0.585222	0.666547	11.9055	4.87e-22	1.38e-21	1.84489	3.59225	11.9055	1.82e-150	1.52e-148	-0.807604	0.57133	11.9055	2.91e-29	9.02e-29
E2F1	-0.758757	0.591005	9.62095	1.06e-46	6.57e-46	1.84193	3.58488	9.62095	4.58e-203	1.83e-200	-0.558542	0.678988	9.62095	3.28e-18	7.55e-18
CEP55	-0.748724	0.59513	9.24085	5.96e-42	3.15e-41	1.83874	3.57697	9.24085	1.32e-182	2.9e-180	-0.569957	0.673637	9.24085	1.44e-17	3.24e-17
MCM10	-0.660901	0.632483	8.51136	9.12e-38	4.28e-37	1.83063	3.55691	8.51136	4.23e-218	2.72e-215	-0.687468	0.620943	8.51136	7.33e-29	2.25e-28
KIF20A	-0.544302	0.685723	9.40633	9.57e-21	2.6e-20	1.81868	3.52758	9.40633	1.87e-160	2.1e-158	-0.842435	0.557701	9.40633	1.86e-34	6.58e-34
PTTG1	-0.810972	0.569998	12.1039	2.91e-46	1.77e-45	1.79761	3.47645	12.1039	1.96e-159	2.14e-157	-0.445034	0.734567	12.1039	1.32e-10	2.39e-10
KIF15	-0.508159	0.703119	9.7253	9.06e-20	2.38e-19	1.79563	3.47167	9.7253	4.81e-173	8.31e-171	-0.873289	0.545901	9.7253	2.26e-40	9.09e-40
TPX2	-0.649765	0.637384	10.1008	1.07e-34	4.53e-34	1.79241	3.46393	10.1008	5.8e-193	1.77e-190	-0.669338	0.628795	10.1008	4.49e-26	1.28e-25
GINS2	-0.492804	0.710643	10.6685	1.47e-18	3.73e-18	1.78772	3.4527	10.6685	6.75e-170	1.04e-167	-0.888071	0.540336	10.6685	1.62e-41	6.75e-41
CDCA8	-0.678399	0.624859	11.0899	1.37e-35	5.94e-35	1.78753	3.45223	11.0899	2.32e-177	4.33e-175	-0.624341	0.648716	11.0899	1.59e-21	4.03e-21
KIF4A	-0.776519	0.583773	8.74492	1.18e-64	1.37e-63	1.7859	3.44834	8.74492	4.65e-269	2.69e-265	-0.483555	0.715213	8.74492	7.57e-18	1.72e-17
E2F8	-0.853629	0.553391	7.13201	4e-72	6.17e-71	1.77526	3.423	7.13201	3.51e-234	6.78e-231	-0.364606	0.776681	7.13201	6.34e-10	1.12e-09
ASPM	-0.563598	0.676613	9.25268	6.6e-22	1.86e-21	1.77132	3.41366	9.25268	3.15e-148	2.53e-146	-0.772966	0.585213	9.25268	9.86e-29	3.01e-28
MELK	-0.550189	0.682931	9.48814	7.5e-23	2.18e-22	1.76604	3.40119	9.48814	9.97e-165	1.27e-162	-0.78732	0.57942	9.48814	1.28e-32	4.31e-32
MAD2L1	-0.542173	0.686736	9.804	8.79e-23	2.55e-22	1.76166	3.39088	9.804	4.02e-169	5.89e-167	-0.794811	0.576419	9.804	4.12e-34	1.45e-33
FOXN4	-0.50556	0.704387	9.3249	4.54e-12	9.03e-12	1.74802	3.35898	9.3249	6.45e-88	1.84e-86	-0.834693	0.560702	9.3249	4.93e-22	1.26e-21
NMU	-1.07936	0.473238	7.56467	8.18e-50	5.6e-49	1.73863	3.33717	7.56467	3.98e-83	1.01e-81	-0.0115079	0.992055	7.56467	0.897643	0.906487
MYBL2	-0.74841	0.595259	9.79198	8.37e-48	5.39e-47	1.73566	3.33031	9.79198	7.88e-186	1.86e-183	-0.478846	0.717552	9.79198	2.34e-14	4.78e-14
FOXM1	-0.623061	0.649292	10.0126	4.64e-30	1.68e-29	1.73456	3.32778	10.0126	2.18e-164	2.74e-162	-0.655874	0.634691	10.0126	1.24e-23	3.32e-23
AURKA	-0.77766	0.583312	9.38596	3e-63	3.32e-62	1.72869	3.31427	9.38596	2.47e-237	7.16e-234	-0.431123	0.741684	9.38596	3.92e-14	7.95e-14
RAD51	-0.588173	0.665185	10.2477	4.62e-28	1.56e-27	1.72174	3.29834	10.2477	1.21e-170	1.94e-168	-0.694032	0.618124	10.2477	1.57e-27	4.64e-27
MKI67	-0.513381	0.700578	8.28378	4.74e-20	1.26e-19	1.71024	3.27214	8.28378	2.01e-152	1.78e-150	-0.790022	0.578335	8.28378	7.18e-33	2.44e-32
RRM2	-0.54478	0.685496	9.489	1.95e-22	5.58e-22	1.70392	3.25785	9.489	5.24e-151	4.4e-149	-0.739826	0.598812	9.489	7e-29	2.15e-28
KIF2C	-0.529694	0.692701	11.2242	2.73e-21	7.54e-21	1.70334	3.25653	11.2242	4.4e-151	3.72e-149	-0.760728	0.590199	11.2242	1.55e-30	4.96e-30
NCAPH	-0.552505	0.681835	9.65031	4.5e-25	1.41e-24	1.70035	3.24979	9.65031	2.83e-167	3.9e-165	-0.725682	0.604711	9.65031	2.65e-30	8.43e-30
CCNA2	-0.641636	0.640985	8.97622	7.93e-41	4.06e-40	1.69805	3.24462	8.97622	3.74e-214	2.28e-211	-0.597068	0.661096	8.97622	4.59e-25	1.27e-24
FAM83D	-0.568668	0.674239	8.61554	1.19e-26	3.88e-26	1.69608	3.24018	8.61554	2.35e-167	3.31e-165	-0.698934	0.616027	8.61554	2.64e-28	7.96e-28
FANCI	-0.654916	0.635112	9.39389	6.91e-40	3.42e-39	1.66757	3.17679	9.39389	7.16e-188	1.8e-185	-0.551137	0.682482	9.39389	3.1e-20	7.58e-20
CDC6	-0.56952	0.673841	9.11018	3.17e-29	1.11e-28	1.65995	3.16006	9.11018	7.43e-178	1.46e-175	-0.665639	0.630409	9.11018	3.85e-28	1.15e-27
OIP5	-0.65657	0.634385	9.33917	2.51e-42	1.34e-41	1.65221	3.14316	9.33917	1.33e-196	4.66e-194	-0.53515	0.690087	9.33917	3.88e-20	9.47e-20
HIST1H1B	-0.795246	0.576245	7.60424	7.77e-51	5.5e-50	1.65154	3.1417	7.60424	3.93e-152	3.42e-150	-0.337624	0.791344	7.60424	2.06e-07	3.32e-07
CDCA2	-0.63163	0.645447	8.16464	4.62e-40	2.3e-39	1.64987	3.13806	8.16464	7.81e-202	3.02e-199	-0.568488	0.674323	8.16464	4.34e-23	1.14e-22
NDC80	-0.583705	0.667248	9.47616	3.4e-29	1.19e-28	1.62036	3.07451	9.47616	2.29e-157	2.29e-155	-0.610327	0.655048	9.47616	1.13e-22	2.95e-22
RHBG	-0.917501	0.529425	8.19657	7e-45	4.04e-44	1.61971	3.07313	8.19657	6.83e-91	2.09e-89	-0.135737	0.910205	8.19657	0.0896932	0.104677
TTK	-0.266122	0.831552	8.94318	3.99e-06	6.15e-06	1.61643	3.06616	8.94318	1.01e-126	5.96e-125	-1.05783	0.480354	8.94318	6.1e-57	3.54e-56
NEIL3	-0.610981	0.654751	7.13943	1.69e-40	8.53e-40	1.60323	3.03824	7.13943	3.55e-207	1.58e-204	-0.556385	0.680004	7.13943	7.37e-24	1.99e-23
CKAP2L	-0.319593	0.801296	9.29401	1.13e-07	1.86e-07	1.60201	3.03566	9.29401	4.12e-112	1.89e-110	-0.969087	0.510829	9.29401	1.98e-43	8.59e-43
ANLN	-0.46405	0.724948	8.85228	1.34e-19	3.5e-19	1.59057	3.01168	8.85228	1.17e-158	1.22e-156	-0.753784	0.593046	8.85228	9.91e-36	3.58e-35
MAGEA4	-1.05549	0.481133	6.94984	2.33e-31	8.81e-31	1.58758	3.00544	6.94984	2.22e-44	1.88e-43	0.0887608	1.06346	6.94984	0.420118	0.449868
NUSAP1	-0.474179	0.719876	9.38883	1.44e-20	3.9e-20	1.58329	2.99653	9.38883	2.09e-158	2.14e-156	-0.732939	0.601677	9.38883	4.66e-34	1.64e-33
TROAP	-0.506408	0.703973	11.258	2.11e-17	5.14e-17	1.58285	2.9956	11.258	6.48e-110	2.85e-108	-0.686774	0.621241	11.258	3.33e-22	8.57e-22
ZWINT	-0.533103	0.691067	10.8922	8.04e-26	2.57e-25	1.58185	2.99354	10.8922	1e-158	1.06e-156	-0.647986	0.63817	10.8922	7.82e-27	2.26e-26
BLM	-0.680552	0.623927	10.0068	9.73e-50	6.63e-49	1.58176	2.99335	10.0068	2.06e-196	7.01e-194	-0.438514	0.737894	10.0068	4.58e-15	9.56e-15
CDC25C	-0.499112	0.707542	8.69063	9.26e-23	2.68e-22	1.57735	2.9842	8.69063	1.01e-157	1.02e-155	-0.692252	0.618887	8.69063	1.52e-30	4.85e-30
CENPE	-0.540081	0.687732	9.4372	7.53e-30	2.7e-29	1.5738	2.97687	9.4372	1.14e-182	2.53e-180	-0.630919	0.645765	9.4372	1.03e-28	3.16e-28
CCNB1	-0.499365	0.707418	10.2684	1.45e-24	4.45e-24	1.57136	2.97184	10.2684	3.49e-172	5.78e-170	-0.686572	0.621329	10.2684	1.8e-32	6.07e-32
RAD51AP1	-0.441596	0.73632	9.67254	2.43e-17	5.89e-17	1.56726	2.96342	9.67254	2.68e-147	2.14e-145	-0.76497	0.588466	9.67254	1.18e-35	4.27e-35
KIF11	-0.454962	0.72953	8.69226	5.91e-21	1.62e-20	1.55845	2.94538	8.69226	6.35e-173	1.08e-170	-0.738166	0.599501	8.69226	2.93e-38	1.13e-37
FAM64A	-0.340745	0.789633	11.366	7.24e-08	1.21e-07	1.55241	2.93306	11.366	1.64e-93	5.3e-92	-0.894993	0.53775	11.366	1.5e-33	5.19e-33
MND1	-0.539804	0.687864	8.72056	9.68e-32	3.72e-31	1.5519	2.93202	8.72056	3.77e-191	1.12e-188	-0.611861	0.654352	8.72056	8.99e-29	2.75e-28
CHEK1	-0.467016	0.72346	8.96482	2.32e-22	6.62e-22	1.54739	2.92289	8.96482	2.68e-173	4.78e-171	-0.711227	0.610801	8.96482	4.33e-36	1.58e-35
MCM2	-0.636841	0.64312	9.87505	3.28e-53	2.54e-52	1.5472	2.92249	9.87505	2.04e-241	7.88e-238	-0.46989	0.722019	9.87505	1.31e-20	3.24e-20
BUB1	-0.504939	0.70469	8.68666	1.15e-24	3.55e-24	1.5331	2.89408	8.68666	1.99e-158	2.06e-156	-0.644681	0.639634	8.68666	3.41e-28	1.02e-27
CCNA1	-0.749851	0.594665	7.98355	3.75e-45	2.18e-44	1.53024	2.88833	7.98355	3.8e-127	2.26e-125	-0.294341	0.815445	7.98355	5.97e-06	8.98e-06
ASCL1	-0.506528	0.703915	8.71979	8.25e-11	1.57e-10	1.52066	2.86922	8.71979	6.95e-57	8.72e-56	-0.631369	0.645563	8.71979	1.05e-11	1.98e-11
GTSE1	-0.50392	0.705188	8.97	2.17e-26	7.01e-26	1.51941	2.86675	8.97	8.37e-170	1.28e-167	-0.633968	0.644402	8.97	2.47e-29	7.67e-29
POLQ	-0.588497	0.665035	8.70006	2.13e-37	9.88e-37	1.51475	2.8575	8.70006	5.57e-178	1.11e-175	-0.509724	0.702357	8.70006	4.14e-20	1.01e-19
MAGEA11	-1.00724	0.497497	6.80931	2.89e-50	2.02e-49	1.5098	2.8477	6.80931	7.89e-72	1.54e-70	0.0893239	1.06387	6.80931	0.282437	0.310592
TACC3	-0.860234	0.550863	9.50055	3.87e-82	8.53e-81	1.5011	2.83059	9.50055	3.17e-173	5.56e-171	-0.111713	0.925489	9.50055	0.0470078	0.0562084
CENPN	-0.667108	0.629768	9.28761	3.44e-45	2.01e-44	1.48511	2.79939	9.28761	1.18e-156	1.16e-154	-0.371763	0.772838	9.28761	1.12e-10	2.03e-10
HMGB2	-0.537296	0.689061	13.7632	1.81e-31	6.88e-31	1.47186	2.7738	13.7632	2.43e-167	3.39e-165	-0.544336	0.685707	13.7632	5.8e-23	1.52e-22
FAM111B	-0.608448	0.655902	6.92527	1.99e-42	1.07e-41	1.46906	2.76841	6.92527	2.12e-177	4.03e-175	-0.440802	0.736725	6.92527	3.4e-16	7.35e-16
CDC20	-0.594645	0.662207	9.44626	1.62e-40	8.18e-40	1.44313	2.71909	9.44626	1.01e-169	1.52e-167	-0.437372	0.738478	9.44626	5.74e-16	1.23e-15
PLK1	-0.551731	0.682201	9.36406	4.91e-41	2.52e-40	1.44227	2.71747	9.36406	1.14e-208	5.27e-206	-0.497549	0.708309	9.36406	1.04e-23	2.78e-23
BRIP1	-0.565552	0.675697	6.58982	3.72e-45	2.17e-44	1.43388	2.70173	6.58982	4.23e-218	2.72e-215	-0.470476	0.721726	6.58982	3.08e-22	7.93e-22
KCNQ2	-0.172603	0.88724	10.2138	0.00422245	0.00541684	1.43292	2.69994	10.2138	1.24e-87	3.52e-86	-1.02764	0.490512	10.2138	4.15e-49	2.03e-48
CKS2	-0.600929	0.659329	11.4334	1.01e-40	5.13e-40	1.42604	2.68708	11.4334	1.48e-161	1.79e-159	-0.413272	0.750919	11.4334	3.49e-14	7.09e-14
CDT1	-0.536011	0.689675	10.43	2.63e-32	1.03e-31	1.42334	2.68206	10.43	3.88e-160	4.32e-158	-0.503063	0.705607	10.43	2.3e-20	5.65e-20
BMP7	-1.05229	0.482202	8.3772	2.35e-29	8.29e-29	1.41853	2.67313	8.3772	2.68e-33	1.53e-32	0.23436	1.17638	8.3772	0.0388626	0.0468072
HMMR	-0.387503	0.764452	9.82757	9.55e-15	2.11e-14	1.4073	2.6524	9.82757	2.71e-126	1.56e-124	-0.699707	0.615697	9.82757	1.62e-32	5.48e-32
E2F7	-0.499978	0.707118	8.35314	1.44e-26	4.67e-26	1.39943	2.63798	8.35314	8.3e-143	6.25e-141	-0.532996	0.691118	8.35314	1.87e-21	4.73e-21
KIF23	-0.473958	0.719987	9.91497	4.45e-25	1.39e-24	1.39466	2.62927	9.91497	6.51e-150	5.31e-148	-0.565708	0.675624	9.91497	3.7e-25	1.03e-24
POLA2	-0.684492	0.622225	9.06458	2.58e-74	4.3e-73	1.37508	2.59382	9.06458	2.23e-221	1.98e-218	-0.249342	0.84128	9.06458	9.37e-08	1.53e-07
PTTG2	-0.649583	0.637464	9.6898	1.26e-42	6.8e-42	1.37197	2.58824	9.6898	5.98e-129	3.61e-127	-0.296157	0.814419	9.6898	3.12e-07	4.99e-07
KIF14	-0.399418	0.758164	7.43429	8.73e-20	2.29e-19	1.37128	2.587	7.43429	2.86e-161	3.35e-159	-0.650791	0.636931	7.43429	2.61e-36	9.53e-36
ARHGAP11A	-0.542851	0.686413	7.28838	2.86e-42	1.53e-41	1.36122	2.56903	7.28838	1.78e-194	5.72e-192	-0.438175	0.738068	7.28838	9.56e-20	2.3e-19
ENDOG	-0.624841	0.648491	10.4917	2.16e-51	1.57e-50	1.34847	2.54642	10.4917	2.2e-169	3.26e-167	-0.310417	0.806409	10.4917	9.44e-10	1.66e-09
DEPDC1B	-0.449623	0.732234	8.49483	8.6e-26	2.74e-25	1.34806	2.54569	8.49483	1.37e-162	1.66e-160	-0.558872	0.678833	8.49483	5.4e-28	1.62e-27
RNASEH2A	-0.552505	0.681835	11.2856	3.4e-51	2.44e-50	1.34619	2.5424	11.2856	3.87e-231	5.6e-228	-0.411115	0.752042	11.2856	3.26e-20	7.97e-20
MKRN3	-0.684474	0.622233	7.40075	3.95e-33	1.6e-32	1.33704	2.52632	7.40075	1.9e-81	4.63e-80	-0.215579	0.861201	7.40075	0.00187887	0.00248776
SLCO1A2	-0.723235	0.605738	6.35404	3.06e-35	1.32e-34	1.33105	2.51586	6.35404	1.42e-76	3.08e-75	-0.155217	0.897997	6.35404	0.0289826	0.0353151
CHAF1A	-0.564974	0.675967	9.10854	6.53e-51	4.64e-50	1.32878	2.51191	9.10854	1.08e-208	5.19e-206	-0.377944	0.769533	9.10854	1.76e-16	3.83e-16
ASF1B	-0.631459	0.645523	9.11046	5.86e-59	5.57e-58	1.3246	2.50463	9.11046	2.84e-186	7.01e-184	-0.279815	0.823697	9.11046	5.63e-09	9.6e-09
PKMYT1	-0.434352	0.740026	9.60931	3.46e-26	1.11e-25	1.31582	2.48943	9.60931	4.24e-170	6.73e-168	-0.55192	0.682112	9.60931	1.12e-29	3.49e-29
NTS	-1.33841	0.395457	6.43393	4.87e-96	1.63e-94	1.31127	2.4816	6.43393	1.59e-55	1.9e-54	0.735939	1.66548	6.43393	6.66e-20	1.61e-19
CENPK	-0.359811	0.779267	8.40537	5.39e-15	1.2e-14	1.30818	2.47629	8.40537	2.32e-129	1.41e-127	-0.650994	0.636842	8.40537	3.07e-33	1.05e-32
CENPH	-0.346427	0.786529	9.40541	5.04e-14	1.08e-13	1.30812	2.47619	9.40541	1.05e-129	6.44e-128	-0.669943	0.628532	9.40541	2.85e-35	1.02e-34
HIST1H3B	-0.549519	0.683248	10.9883	2.54e-38	1.21e-37	1.30373	2.46867	10.9883	5.48e-150	4.51e-148	-0.377642	0.769694	10.9883	2.07e-13	4.11e-13
CASC5	-0.440379	0.736941	6.86606	6.21e-27	2.04e-26	1.30372	2.46865	6.86606	1.58e-166	2.15e-164	-0.532619	0.691299	6.86606	1.01e-27	3e-27
MMP12	-0.716203	0.608697	8.87966	1.08e-12	2.21e-12	1.30231	2.46623	8.87966	5.67e-25	2.37e-24	-0.139673	0.907725	8.87966	0.247319	0.274239
POLE2	-0.439217	0.737535	8.48452	6.03e-30	2.17e-29	1.29319	2.45069	8.48452	2.38e-188	6.13e-186	-0.524913	0.695001	8.48452	4.06e-30	1.28e-29
SEMA3D	-0.85381	0.553322	7.62009	3.65e-38	1.73e-37	1.2886	2.4429	7.62009	9.3e-55	1.09e-53	0.067915	1.0482	7.62009	0.399889	0.429557
UHRF1	-0.518295	0.698197	7.80497	2.17e-46	1.33e-45	1.28622	2.43888	7.80497	2.26e-213	1.31e-210	-0.406427	0.754489	7.80497	2.21e-20	5.41e-20
CENPM	-0.433147	0.740644	8.67668	1.92e-23	5.7e-23	1.28464	2.43621	8.67668	1.96e-140	1.43e-138	-0.52594	0.694507	8.67668	2.64e-24	7.19e-24
MAGEA1	-0.973312	0.509336	7.10005	7.68e-22	2.16e-21	1.28052	2.42926	7.10005	1.46e-23	5.81e-23	0.244794	1.18492	7.10005	0.0453483	0.0543195
STK33	-1.04115	0.48594	7.21932	3.23e-90	9.12e-89	1.27787	2.42482	7.21932	1.66e-84	4.35e-83	0.343474	1.26881	7.21932	1.26e-07	2.04e-07
HMGB3	-0.455819	0.729096	9.39179	3.38e-34	1.41e-33	1.27256	2.41589	9.39179	2.59e-195	8.57e-193	-0.483011	0.715483	9.39179	3.72e-27	1.09e-26
CDCA7	-0.425883	0.744383	8.18181	8.67e-21	2.36e-20	1.26675	2.40618	8.18181	6.52e-122	3.45e-120	-0.520363	0.697196	8.18181	8.42e-22	2.14e-21
GNGT1	-0.657063	0.634168	7.15291	9.92e-15	2.18e-14	1.26552	2.40415	7.15291	8.19e-33	4.59e-32	-0.190985	0.876008	7.15291	0.0611083	0.0723148
ATAD2	-0.460929	0.726518	8.42216	1.84e-35	7.94e-35	1.26032	2.39549	8.42216	4.9e-194	1.53e-191	-0.464886	0.724528	8.42216	1.45e-25	4.07e-25
CENPO	-0.382177	0.767279	9.70939	4.15e-25	1.29e-24	1.25353	2.38424	9.70939	5.41e-197	1.96e-194	-0.570686	0.673297	9.70939	3.72e-39	1.45e-38
HELLS	-0.353649	0.782602	8.65882	5.77e-18	1.43e-17	1.25307	2.38348	8.65882	1.31e-153	1.2e-151	-0.610791	0.654837	8.65882	8.28e-37	3.06e-36
ODC1	-0.617332	0.651875	13.2201	2.56e-72	4e-71	1.25277	2.38299	13.2201	7.39e-220	5.35e-217	-0.236082	0.849048	13.2201	3.1e-08	5.15e-08
HIST1H1E	-0.727073	0.604128	9.69024	4.44e-72	6.83e-71	1.24708	2.3736	9.69024	3.16e-143	2.39e-141	-0.0751801	0.949224	9.69024	0.136668	0.156487
UBE2T	-0.223753	0.856335	11.7802	7.66e-09	1.34e-08	1.24066	2.36306	11.7802	2.09e-174	3.78e-172	-0.784228	0.580663	11.7802	6.1e-70	4.57e-69
TRIP13	-0.335868	0.792308	7.71933	1.38e-17	3.37e-17	1.24023	2.36237	7.71933	2.63e-165	3.44e-163	-0.624641	0.648581	7.71933	9.55e-42	3.99e-41
PRC1	-0.135301	0.91048	12.0075	0.00478245	0.00611358	1.2386	2.35969	12.0075	1.24e-105	5.04e-104	-0.908008	0.53292	12.0075	3.54e-61	2.25e-60
SMC4	-0.573275	0.67209	7.97457	2.11e-60	2.1e-59	1.21817	2.32651	7.97457	2.17e-198	8.11e-196	-0.267907	0.830523	7.97457	4.93e-10	8.74e-10
FBXO5	-0.255724	0.837567	9.99305	3.26e-09	5.8e-09	1.21245	2.31731	9.99305	1.27e-126	7.39e-125	-0.713775	0.609723	9.99305	9.6e-46	4.35e-45
EME1	-0.342835	0.78849	8.82007	5.07e-17	1.22e-16	1.21175	2.31618	8.82007	2.16e-142	1.62e-140	-0.589446	0.664598	8.82007	1.97e-34	6.94e-34
CDC25A	-0.368577	0.774546	8.38673	1.27e-23	3.79e-23	1.20516	2.30563	8.38673	3.63e-180	7.65e-178	-0.547041	0.684423	8.38673	2.67e-36	9.74e-36
PLK4	-0.353703	0.782573	7.55184	9.38e-23	2.71e-22	1.20422	2.30413	7.55184	5.16e-190	1.46e-187	-0.567328	0.674866	7.55184	8.71e-41	3.53e-40
PCNA	-0.368956	0.774343	12.562	7.08e-22	1.99e-21	1.20137	2.29959	12.562	2.7e-161	3.19e-159	-0.543137	0.686277	12.562	5.64e-33	1.92e-32
ALK	-0.387981	0.764198	10.3686	4.38e-11	8.42e-11	1.19989	2.29722	10.3686	2.23e-62	3.3e-61	-0.514803	0.699888	10.3686	1.99e-13	3.94e-13
ECT2	-0.293314	0.816025	8.75074	5.17e-14	1.11e-13	1.19871	2.29534	8.75074	1.47e-156	1.43e-154	-0.648185	0.638083	8.75074	4.12e-46	1.89e-45
CLSPN	-0.492142	0.710969	6.87597	9.37e-39	4.5e-38	1.19697	2.29258	6.87597	1.51e-161	1.8e-159	-0.364294	0.776849	6.87597	1.64e-15	3.47e-15
GSG2	-0.444652	0.734762	7.64492	1.14e-31	4.38e-31	1.19514	2.28967	7.64492	6.26e-161	7.11e-159	-0.430108	0.742206	7.64492	3.74e-21	9.37e-21
SDK2	-0.895561	0.537538	7.3826	3.03e-80	6.09e-79	1.19396	2.2878	7.3826	4.17e-90	1.26e-88	0.211264	1.1577	7.3826	0.000351333	0.000485967
NUP62CL	-0.4277	0.743446	7.00641	3e-25	9.41e-25	1.19378	2.28751	7.00641	2.97e-133	2e-131	-0.45297	0.730537	7.00641	3.71e-20	9.04e-20
MCM6	-0.449704	0.732193	11.2328	9.23e-32	3.55e-31	1.19225	2.2851	11.2328	3.53e-156	3.41e-154	-0.42037	0.747233	11.2328	6.96e-20	1.68e-19
SGOL2	-0.253352	0.838945	8.73761	1.05e-09	1.9e-09	1.1913	2.28358	8.73761	2.42e-133	1.65e-131	-0.698352	0.616276	8.73761	1.95e-47	9.18e-47
RRM1	-0.485794	0.714104	12.2875	2.4e-46	1.47e-45	1.18375	2.27166	12.2875	4.44e-203	1.83e-200	-0.361565	0.77832	12.2875	1.85e-18	4.29e-18
DIAPH3	-0.389318	0.763491	7.67502	3.35e-25	1.05e-24	1.1827	2.27	7.67502	4.73e-163	5.83e-161	-0.497631	0.708269	7.67502	7.03e-29	2.16e-28
DEPDC1	-0.306463	0.808622	8.02885	8.1e-15	1.79e-14	1.18196	2.26884	8.02885	1.49e-146	1.16e-144	-0.614636	0.653095	8.02885	2.62e-40	1.05e-39
IGF2BP1	-0.0403375	0.972427	8.80358	0.606158	0.632078	1.17119	2.25198	8.80358	1.19e-33	6.88e-33	-0.98299	0.50593	8.80358	8.25e-27	2.39e-26
RIBC2	-0.580627	0.668673	7.42255	2.01e-44	1.15e-43	1.16173	2.23726	7.42255	3.3e-119	1.63e-117	-0.207338	0.866134	7.42255	4.43e-05	6.4e-05
HIST1H2AL	-0.619778	0.650771	6.98682	7.74e-58	7.07e-57	1.16157	2.237	6.98682	4.78e-138	3.4e-136	-0.151597	0.900253	6.98682	0.00149174	0.00198904
NXT2	-0.991681	0.502892	8.16164	6.05e-143	1.19e-140	1.16138	2.23671	8.16164	2.26e-119	1.12e-117	0.376701	1.29837	8.16164	8.13e-14	1.64e-13
HIST1H4D	-0.219945	0.858598	10.0088	1.65e-05	2.45e-05	1.15126	2.22109	10.0088	5.74e-78	1.3e-76	-0.710236	0.61122	10.0088	1.49e-32	5.05e-32
MAGEC1	-0.703191	0.614212	7.74677	4.01e-35	1.72e-34	1.14922	2.21795	7.74677	2.79e-59	3.8e-58	-0.02218	0.984744	7.74677	0.748823	0.767441
BRCA2	-0.471251	0.721339	6.87351	1.09e-40	5.53e-40	1.14849	2.21682	6.87351	2e-172	3.36e-170	-0.350903	0.784093	6.87351	2.13e-16	4.63e-16
FANCA	-0.326829	0.797287	9.49059	3.56e-14	7.68e-14	1.1439	2.20978	9.49059	2.51e-110	1.12e-108	-0.551914	0.682115	9.49059	2.5e-27	7.35e-27
RAD51C	-0.454349	0.72984	11.2801	3.68e-48	2.4e-47	1.13314	2.19336	11.2801	3.83e-227	4.92e-224	-0.361271	0.778478	11.2801	1.15e-21	2.91e-21
KLK1	-0.912671	0.531201	6.92542	3.94e-55	3.29e-54	1.13311	2.19332	6.92542	4.45e-53	4.94e-52	0.289606	1.22231	6.92542	5.57e-05	8e-05
RFC5	-0.364361	0.776813	10.7303	6.76e-24	2.03e-23	1.13233	2.19213	10.7303	4.18e-161	4.84e-159	-0.488339	0.712845	10.7303	5.08e-30	1.6e-29
KNTC1	-0.338924	0.790631	10.273	2.82e-18	7.07e-18	1.13164	2.19108	10.273	3.57e-136	2.51e-134	-0.523848	0.695514	10.273	4.36e-30	1.37e-29
KIF24	-0.435	0.739694	7.15181	1.35e-30	5e-30	1.12734	2.18456	7.15181	3.34e-141	2.47e-139	-0.383593	0.766526	7.15181	3.34e-17	7.43e-17
ZYG11A	-0.684973	0.622017	5.77982	3.71e-55	3.1e-54	1.12633	2.18303	5.77982	5.52e-97	1.89e-95	-0.0277202	0.980969	5.77982	0.607984	0.634097
SAAL1	-0.539762	0.687885	9.71877	9.15e-69	1.23e-67	1.1258	2.18222	9.71877	3.89e-222	4.1e-219	-0.233451	0.850598	9.71877	9.31e-10	1.63e-09
IGSF9	-0.109218	0.92709	9.94051	0.0538175	0.0635312	1.12229	2.17692	9.94051	1.68e-59	2.3e-58	-0.841739	0.557971	9.94051	2.72e-37	1.02e-36
WFDC2	-0.876065	0.544852	7.08823	1.17e-58	1.1e-57	1.12032	2.17394	7.08823	4.63e-60	6.43e-59	0.24899	1.18837	7.08823	0.000201075	0.00028183
KIAA0101	-0.424962	0.744858	8.23513	1.27e-33	5.22e-33	1.11908	2.17208	8.23513	7.01e-165	9.03e-163	-0.390509	0.762861	8.23513	2.5e-20	6.13e-20
CHGA	-0.289585	0.818137	12.6432	3.59e-09	6.36e-09	1.11777	2.17011	12.6432	2.47e-79	5.75e-78	-0.581587	0.668228	12.6432	9.91e-24	2.66e-23
E2F2	-0.451963	0.731047	9.0327	4.5e-32	1.75e-31	1.11776	2.17009	9.0327	9.41e-134	6.45e-132	-0.35099	0.784046	9.0327	3.12e-14	6.36e-14
C1QL1	-0.316001	0.803294	9.6669	1.45e-08	2.51e-08	1.11697	2.1689	9.6669	2.37e-60	3.34e-59	-0.543365	0.686169	9.6669	2.04e-16	4.44e-16
HIST1H2BB	-0.554582	0.680854	9.10258	3.55e-43	1.94e-42	1.11495	2.16587	9.10258	1.06e-116	5.1e-115	-0.20277	0.868881	9.10258	3.73e-05	5.41e-05
SUV39H2	-0.28006	0.823557	8.83533	5.51e-17	1.32e-16	1.11233	2.16195	8.83533	1.82e-189	5.03e-187	-0.590288	0.66421	8.83533	6.94e-52	3.59e-51
HIST1H2BG	-0.559026	0.67876	8.36251	2.65e-46	1.61e-45	1.10802	2.1555	8.36251	2.92e-122	1.56e-120	-0.190307	0.876419	8.36251	7.11e-05	0.000101706
MAGEA8	-0.839767	0.558734	7.16782	1.56e-32	6.18e-32	1.1041	2.14964	7.16782	3.77e-35	2.3e-34	0.21185	1.15817	7.16782	0.013664	0.0170679
CRH	-1.15524	0.448991	8.45361	3.71e-21	1.02e-20	1.09621	2.13792	8.45361	1.86e-12	4.63e-12	0.666854	1.58761	8.45361	5.95e-06	8.95e-06
SHD	0.0416343	1.02928	13.2787	0.455216	0.484095	1.09354	2.13397	13.2787	2.67e-58	3.53e-57	-1.03042	0.489566	13.2787	2.77e-58	1.65e-57
FZD5	-0.510317	0.702068	8.62571	2.46e-28	8.39e-28	1.08854	2.12659	8.62571	5.82e-83	1.47e-81	-0.242174	0.84547	8.62571	1.48e-05	2.19e-05
LY6H	-0.76038	0.590341	8.12047	5.71e-18	1.42e-17	1.087	2.12432	8.12047	1.17e-22	4.5e-22	0.114299	1.08245	8.12047	0.280959	0.309143
CCDC34	-0.450537	0.73177	7.79749	2.34e-51	1.7e-50	1.07726	2.11003	7.79749	1.51e-220	1.25e-217	-0.317047	0.802711	7.79749	2.98e-18	6.87e-18
POLD1	-0.442217	0.736003	11.5266	3.86e-39	1.87e-38	1.07532	2.10719	11.5266	1.94e-163	2.42e-161	-0.327141	0.797115	11.5266	1.23e-15	2.62e-15
MAB21L2	-0.478231	0.717857	9.84307	9.11e-15	2.01e-14	1.07505	2.10679	9.84307	7.26e-45	6.24e-44	-0.275753	0.826019	9.84307	0.000194766	0.000273286
CDCA4	-0.498805	0.707693	7.72354	5.19e-62	5.49e-61	1.07492	2.1066	7.72354	9.75e-213	5.38e-210	-0.246424	0.842983	7.72354	2.65e-11	4.9e-11
TEX15	-0.351809	0.783601	5.97326	6.24e-21	1.71e-20	1.07474	2.10634	5.97326	7.53e-131	4.79e-129	-0.455006	0.729507	5.97326	1.78e-24	4.86e-24
XRCC2	-0.317549	0.802432	7.56282	5.84e-19	1.49e-18	1.07405	2.10534	7.56282	3.58e-147	2.84e-145	-0.503051	0.705613	7.56282	7.95e-33	2.7e-32
RACGAP1	-0.165051	0.891897	11.4038	2.85e-05	4.19e-05	1.06888	2.09781	11.4038	1.58e-117	7.69e-116	-0.715016	0.609198	11.4038	1.05e-55	5.91e-55
DHRS2	-0.611244	0.654632	9.30149	2.24e-22	6.39e-22	1.06613	2.09381	9.30149	4.2e-42	3.29e-41	-0.0789485	0.946747	9.30149	0.298104	0.326395
NPTX2	-0.865017	0.54904	9.04825	3.67e-24	1.11e-23	1.06596	2.09357	9.04825	5.36e-23	2.08e-22	0.281576	1.21552	9.04825	0.00629333	0.00807798
WDR34	-0.472013	0.720958	11.4152	5.04e-52	3.73e-51	1.06024	2.08527	11.4152	3e-190	8.69e-188	-0.271428	0.828499	11.4152	9.46e-13	1.84e-12
SAC3D1	-0.5599	0.678349	11.3257	2.25e-64	2.61e-63	1.05706	2.08068	11.3257	6.93e-159	7.37e-157	-0.143798	0.905133	11.3257	0.000447236	0.000615315
GPR26	-0.711024	0.610886	7.31927	8.66e-31	3.21e-30	1.05526	2.07809	7.31927	2.2e-42	1.75e-41	0.0724073	1.05147	7.31927	0.333403	0.362475
SMC2	-0.246764	0.842784	9.08153	3.48e-11	6.7e-11	1.05325	2.0752	9.08153	1.5e-128	9.01e-127	-0.585089	0.666608	9.08153	3.38e-41	1.39e-40
CCNB2	-0.498774	0.707708	9.06957	1.11e-42	6.02e-42	1.04605	2.06488	9.06957	5e-127	2.95e-125	-0.22083	0.858072	9.06957	6.69e-07	1.05e-06
LIN28B	-0.0933611	0.937336	8.05393	0.036528	0.0437996	1.04592	2.06468	8.05393	4.1e-85	1.08e-83	-0.79642	0.575776	8.05393	4.53e-54	2.46e-53
SPAG5	0.019076	1.01331	11.9289	0.691619	0.713995	1.04283	2.06027	11.9289	4.21e-72	8.28e-71	-0.953349	0.516432	11.9289	1.42e-67	1.02e-66
ESPL1	-0.404994	0.755239	8.43125	1.05e-33	4.35e-33	1.04077	2.05733	8.43125	9.56e-156	9.08e-154	-0.349314	0.784957	8.43125	4.35e-18	9.98e-18
FEV	-0.516447	0.699091	8.71737	2.57e-16	6.01e-16	1.03823	2.0537	8.71737	6.11e-40	4.39e-39	-0.188778	0.877349	8.71737	0.0127428	0.015981
E2F3	-0.691721	0.619115	10.8465	5.31e-99	1.95e-97	1.03759	2.05279	10.8465	4.6e-147	3.6e-145	0.0606887	1.04296	10.8465	0.144301	0.164771
MYB	-0.515366	0.699616	8.65607	1.22e-27	4.07e-27	1.03735	2.05246	8.65607	3.29e-71	6.3e-70	-0.189539	0.876886	8.65607	0.000930367	0.00125805
HIST1H3F	-0.3956	0.760173	9.21177	2.53e-25	7.93e-25	1.0346	2.04854	9.21177	6.04e-115	2.89e-113	-0.357165	0.780697	9.21177	5.06e-15	1.05e-14
DBF4	-0.283831	0.821407	8.22116	1.29e-16	3.05e-16	1.03032	2.04248	8.22116	3.95e-147	3.11e-145	-0.512091	0.701205	8.22116	6.25e-37	2.31e-36
C16orf59	-0.232593	0.851104	10.7623	3.45e-11	6.66e-11	1.02443	2.03416	10.7623	1.72e-138	1.23e-136	-0.579618	0.669141	10.7623	1.38e-45	6.21e-45
NCAN	-0.595711	0.661718	7.98618	2.86e-23	8.45e-23	1.01932	2.02697	7.98618	3.24e-42	2.55e-41	-0.0594293	0.959644	7.98618	0.412067	0.441696
TCEAL2	-0.448068	0.733024	11.5499	3.08e-11	5.95e-11	1.01759	2.02454	11.5499	9.6e-34	5.57e-33	-0.267556	0.830726	11.5499	0.00092384	0.00124952
ZNF367	-0.380582	0.768128	6.92307	3.17e-33	1.29e-32	1.01723	2.02403	6.92307	1.5e-168	2.17e-166	-0.36307	0.777508	6.92307	1.41e-21	3.58e-21
TMEM97	-0.279211	0.824042	9.46796	2.52e-13	5.26e-13	1.01655	2.02307	9.46796	1.12e-111	5.09e-110	-0.506414	0.70397	9.46796	2.15e-29	6.69e-29
TRAIP	-0.246698	0.842823	9.51955	1.89e-14	4.12e-14	1.01343	2.0187	9.51955	2.65e-165	3.44e-163	-0.549817	0.683107	9.51955	1.42e-48	6.9e-48
HIST1H2AM	-0.702793	0.614382	8.7457	1.3e-113	7.94e-112	1.00853	2.01186	8.7457	4.56e-153	4.16e-151	0.102223	1.07343	8.7457	0.0100579	0.0127239
HIST1H2BK	-0.908394	0.532778	9.90857	1.55e-136	2.3e-134	1.00822	2.01143	9.90857	4.16e-101	1.54e-99	0.394461	1.31445	9.90857	4.77e-17	1.06e-16
C17orf53	-0.40813	0.7536	7.68989	5.81e-46	3.5e-45	1.00511	2.0071	7.68989	1.34e-206	5.77e-204	-0.313185	0.804863	7.68989	2.12e-19	5.05e-19
STIL	-0.276616	0.825525	7.04384	5.79e-17	1.39e-16	1.00492	2.00683	7.04384	1.87e-151	1.61e-149	-0.499774	0.707218	7.04384	7.12e-38	2.7e-37
GINS1	-0.248875	0.841552	7.57878	1.1e-12	2.25e-12	1.00128	2.00178	7.57878	4.33e-132	2.82e-130	-0.535936	0.689711	7.57878	3.97e-39	1.55e-38
WEE1	-0.417409	0.748768	8.66511	1.93e-39	9.44e-39	0.992298	1.98935	8.66511	4.66e-156	4.46e-154	-0.288626	0.818682	8.66511	6.45e-14	1.3e-13
MCM8	-0.199984	0.87056	10.2176	5.51e-08	9.26e-08	0.98995	1.98612	10.2176	4.68e-115	2.25e-113	-0.595298	0.661908	10.2176	6.61e-44	2.89e-43
NUDT1	-0.472905	0.720512	11.9784	4.11e-45	2.39e-44	0.989369	1.98532	11.9784	1.16e-134	8.08e-133	-0.207216	0.866207	11.9784	4.29e-07	6.81e-07
BDKRB1	-0.549809	0.683111	7.66889	1.77e-17	4.33e-17	0.989308	1.98523	7.66889	1.85e-34	1.1e-33	-0.0979531	0.934358	7.66889	0.208021	0.233006
TIMELESS	-0.348839	0.785216	9.39221	6.15e-30	2.21e-29	0.989044	1.98487	9.39221	3.9e-171	6.36e-169	-0.383109	0.766783	9.39221	1.54e-25	4.33e-25
CHAF1B	-0.275041	0.826427	10.381	5.64e-15	1.25e-14	0.989003	1.98481	10.381	7.46e-126	4.28e-124	-0.487871	0.713077	10.381	6.41e-32	2.13e-31
DDB2	-0.783287	0.581041	11.5141	9.57e-125	9.23e-123	0.988265	1.9838	11.5141	4.1e-124	2.25e-122	0.234528	1.17652	11.5141	3.09e-08	5.13e-08
MDK	-0.369441	0.774082	13.6132	4.39e-22	1.24e-21	0.984885	1.97916	13.6132	4.23e-102	1.61e-100	-0.35016	0.784497	13.6132	2.07e-14	4.23e-14
HIST1H4L	-0.138728	0.908319	13.5697	0.00189873	0.002491	0.977311	1.96879	13.5697	2.81e-73	5.68e-72	-0.67106	0.628045	13.5697	4.85e-38	1.85e-37
RAD54L	-0.37161	0.77292	8.85771	5.36e-29	1.86e-28	0.976928	1.96827	8.85771	7.02e-137	4.96e-135	-0.340012	0.790035	8.85771	1.64e-17	3.69e-17
HIST1H2BM	-0.565686	0.675634	9.89512	4.9e-55	4.07e-54	0.97596	1.96695	9.89512	8.47e-108	3.61e-106	-0.0635516	0.956906	9.89512	0.154779	0.17625
DSN1	-0.373721	0.771789	10.4169	6.55e-30	2.35e-29	0.975388	1.96617	10.4169	1.05e-139	7.6e-138	-0.335646	0.792429	10.4169	2.02e-17	4.52e-17
USP44	-0.77737	0.583429	6.3553	8.7e-102	3.57e-100	0.972554	1.96231	6.3553	2.18e-99	7.85e-98	0.24008	1.18106	6.3553	1.77e-07	2.85e-07
TMPO	-0.299119	0.812748	8.579	4.75e-21	1.3e-20	0.972399	1.9621	8.579	6.81e-153	6.12e-151	-0.438931	0.737681	8.579	1.75e-31	5.76e-31
HIST1H1D	-0.671438	0.62788	9.63082	1.46e-43	8.09e-43	0.972276	1.96193	9.63082	1.39e-57	1.78e-56	0.0898967	1.06429	9.63082	0.130209	0.149416
KCNJ6	-0.477424	0.718259	6.27262	8.73e-16	2e-15	0.969382	1.958	6.27262	2.65e-39	1.86e-38	-0.183046	0.880842	6.27262	0.0102781	0.0129869
INCENP	-0.438326	0.737991	9.2227	1.82e-45	1.07e-44	0.968816	1.95723	9.2227	4.61e-155	4.34e-153	-0.238066	0.847881	9.2227	2.91e-10	5.2e-10
LMNB2	-0.266201	0.831506	9.99298	1.91e-15	4.34e-15	0.962134	1.94819	9.99298	1.69e-132	1.11e-130	-0.476559	0.71869	9.99298	1.32e-33	4.58e-33
RFC3	-0.122758	0.91843	9.15	0.000179945	0.000252245	0.96174	1.94766	9.15	8.68e-142	6.44e-140	-0.679909	0.624205	9.15	3.77e-74	3.07e-73
HIST1H2BC	-0.536625	0.689382	8.29359	3.42e-57	3.05e-56	0.958656	1.9435	8.29359	8.13e-122	4.28e-120	-0.0894496	0.939881	8.29359	0.0314547	0.0381948
LMNB1	-0.0928384	0.937676	11.4555	0.0476319	0.0565113	0.957604	1.94208	11.4555	1.9e-63	2.93e-62	-0.718723	0.607635	11.4555	1.05e-39	4.16e-39
WDHD1	-0.237382	0.848283	7.92089	8.74e-16	2e-15	0.956153	1.94013	7.92089	1.62e-177	3.13e-175	-0.512172	0.701166	7.92089	3.57e-50	1.79e-49
CXorf57	-0.687026	0.621133	6.4619	1.28e-40	6.51e-40	0.954404	1.93778	6.4619	3.43e-49	3.4e-48	0.127907	1.09271	6.4619	0.0420184	0.0504718
MASTL	-0.302356	0.810927	8.05097	9.3e-24	2.78e-23	0.953627	1.93674	8.05097	7.53e-166	1.01e-163	-0.417662	0.748637	8.05097	1.14e-31	3.78e-31
WDR76	-0.325618	0.797957	7.31697	7.62e-27	2.5e-26	0.949794	1.9316	7.31697	7.11e-160	7.84e-158	-0.381223	0.767786	7.31697	6.1e-26	1.73e-25
CENPI	-0.365149	0.776389	6.72835	8.44e-46	5.03e-45	0.945641	1.92604	6.72835	1.98e-235	4.6e-232	-0.321398	0.800294	6.72835	4.11e-25	1.14e-24
RECQL4	-0.290082	0.817856	11.0557	4.54e-15	1.01e-14	0.945277	1.92556	11.0557	2.91e-101	1.09e-99	-0.427674	0.743459	11.0557	1.92e-22	4.99e-22
CALB2	-1.0165	0.494315	7.08999	7.43e-33	2.98e-32	0.939188	1.91745	7.08999	5.66e-18	1.79e-17	0.609292	1.52551	7.08999	3.35e-09	5.76e-09
HIST1H2BD	-0.36964	0.773976	10.1577	7.86e-23	2.28e-22	0.934094	1.91069	10.1577	3.42e-94	1.11e-92	-0.304764	0.809575	10.1577	1.42e-11	2.65e-11
PCDH8	-0.642113	0.640774	8.10084	1.76e-22	5.03e-22	0.93031	1.90568	8.10084	3e-29	1.48e-28	0.0855283	1.06108	8.10084	0.282059	0.310206
RPL39L	-0.331063	0.79495	9.84027	1.16e-12	2.35e-12	0.929677	1.90485	9.84027	1.3e-59	1.79e-58	-0.355622	0.781533	9.84027	1.55e-10	2.79e-10
FANCB	-0.444037	0.735075	7.1475	2.39e-57	2.15e-56	0.92935	1.90442	7.1475	4.43e-179	9.17e-177	-0.194901	0.873633	7.1475	1.23e-08	2.07e-08
FGF10	-0.637704	0.642735	5.68265	7.46e-47	4.67e-46	0.928739	1.90361	5.68265	8e-63	1.21e-61	0.0806616	1.0575	5.68265	0.138426	0.158359
C19orf48	-0.451562	0.731251	9.37368	2.93e-60	2.9e-59	0.920773	1.89313	9.37368	5.41e-178	1.1e-175	-0.176597	0.884788	9.37368	2.09e-07	3.35e-07
KPNA2	-0.326985	0.797201	13.5892	1.39e-23	4.14e-23	0.920103	1.89225	13.5892	5.57e-125	3.1e-123	-0.35291	0.783003	13.5892	1.55e-19	3.69e-19
FADS1	-0.321341	0.800326	12.0635	1.62e-24	4.97e-24	0.913257	1.88329	12.0635	3.91e-134	2.71e-132	-0.354844	0.781954	12.0635	3.4e-21	8.53e-21
SLC25A10	-0.330079	0.795493	8.49965	1.32e-26	4.31e-26	0.911513	1.88102	8.49965	1.64e-138	1.18e-136	-0.340886	0.789556	8.49965	3.16e-20	7.71e-20
CCNB3	-0.50824	0.70308	6.86486	2.34e-37	1.08e-36	0.911408	1.88088	6.86486	4.05e-77	8.98e-76	-0.0877925	0.940961	6.86486	0.0703971	0.0828415
MAGEC2	-0.478764	0.717592	6.58268	5.62e-17	1.35e-16	0.906951	1.87508	6.58268	5.23e-37	3.38e-36	-0.125692	0.916565	6.58268	0.0677059	0.0797719
H1FX	-0.31096	0.806105	11.2717	4.28e-22	1.21e-21	0.906254	1.87417	11.2717	2.86e-125	1.62e-123	-0.363366	0.777349	11.2717	2.75e-21	6.91e-21
ALDH1A2	-0.604294	0.657793	6.18989	1.2e-44	6.88e-44	0.903584	1.87071	6.18989	3.5e-63	5.33e-62	0.0555599	1.03926	6.18989	0.292954	0.321364
CDKN2C	-0.326694	0.797361	12.4001	1.02e-15	2.32e-15	0.90241	1.86919	12.4001	4.26e-74	8.76e-73	-0.337607	0.791353	12.4001	3.83e-12	7.28e-12
ZWILCH	-0.139781	0.907657	9.75442	2.16e-05	3.18e-05	0.901418	1.8679	9.75442	1.82e-120	9.25e-119	-0.602156	0.658769	9.75442	8.56e-57	4.96e-56
CHEK2	-0.554727	0.680786	8.46971	4.59e-77	8.48e-76	0.894756	1.85929	8.46971	2.98e-133	2e-131	-0.00698629	0.995169	8.46971	0.85171	0.863942
HK2	-0.98664	0.504652	8.63495	1.6e-101	6.5e-100	0.894027	1.85836	8.63495	9.88e-50	9.96e-49	0.607008	1.5231	8.63495	7.25e-26	2.05e-25
CKAP2	-0.123769	0.917787	9.33129	0.000154254	0.000217362	0.893633	1.85785	9.33129	7.15e-120	3.58e-118	-0.617979	0.651583	9.33129	8.68e-61	5.47e-60
AIM1L	-0.716136	0.608726	6.91163	2.1e-55	1.77e-54	0.893258	1.85737	6.91163	7.38e-54	8.37e-53	0.223556	1.16761	6.91163	7.06e-05	0.000100981
HIST1H2AJ	-0.542279	0.686685	9.19864	1.45e-69	2.01e-68	0.892698	1.85664	9.19864	5.39e-125	3.02e-123	-0.0228352	0.984296	9.19864	0.551197	0.57941
HIST1H2BO	-0.489887	0.712081	10.1981	4.44e-43	2.42e-42	0.890047	1.85324	10.1981	1.23e-92	3.92e-91	-0.0948819	0.936349	10.1981	0.0294131	0.0358096
DSCR8	-0.438911	0.737691	5.65503	1.92e-17	4.69e-17	0.882368	1.8434	5.65503	5.93e-43	4.79e-42	-0.160449	0.894746	5.65503	0.0098087	0.0124141
CLDN10	-0.64401	0.639932	6.78125	1.11e-50	7.8e-50	0.879667	1.83995	6.78125	1.69e-59	2.31e-58	0.133203	1.09673	6.78125	0.0117735	0.0148053
PSAT1	-0.430078	0.742222	9.87763	4.45e-25	1.39e-24	0.872228	1.83049	9.87763	5.02e-65	8.07e-64	-0.163986	0.892555	9.87763	0.00109774	0.00147592
SUV39H1	-0.450497	0.731791	8.16977	8.66e-71	1.26e-69	0.866373	1.82307	8.16977	4.43e-186	1.07e-183	-0.12979	0.913964	8.16977	3.78e-05	5.47e-05
CRYGD	-0.497849	0.708162	6.87236	9.6e-25	2.97e-24	0.866118	1.82275	6.87236	1.34e-46	1.22e-45	-0.0623211	0.957722	6.87236	0.287887	0.316195
KIAA1524	-0.208404	0.865494	6.97032	9.25e-14	1.96e-13	0.865686	1.82221	6.97032	5.51e-159	5.91e-157	-0.472968	0.720481	6.97032	1.05e-47	5.01e-47
LRRIQ1	-0.220641	0.858184	7.31333	1.2e-06	1.9e-06	0.865269	1.82168	7.31333	2e-54	2.32e-53	-0.455221	0.729398	7.31333	2.56e-17	5.73e-17
TOPBP1	-0.240001	0.846745	10.0169	2.53e-15	5.71e-15	0.862358	1.81801	10.0169	2.29e-129	1.4e-127	-0.425143	0.744765	10.0169	1.25e-32	4.21e-32
SLC27A2	-0.620529	0.650433	7.56789	9.53e-28	3.2e-27	0.861679	1.81715	7.56789	2.37e-33	1.35e-32	0.115836	1.0836	7.56789	0.0926129	0.107921
ISLR2	-0.587723	0.665392	8.30598	1.36e-19	3.55e-19	0.860063	1.81512	8.30598	6.74e-26	2.93e-25	0.0706852	1.05022	8.30598	0.366368	0.395825
LSM4	-0.418318	0.748296	11.8714	1.2e-56	1.05e-55	0.85949	1.8144	11.8714	1.82e-168	2.6e-166	-0.169373	0.889229	11.8714	1.8e-07	2.91e-07
HIST1H2BE	-0.511282	0.701599	9.431	9.02e-50	6.16e-49	0.855509	1.8094	9.431	2.76e-90	8.38e-89	-0.0338223	0.976829	9.431	0.424938	0.454525
HIST1H2AE	-0.262632	0.833566	10.13	6.61e-12	1.31e-11	0.853618	1.80703	10.13	1.42e-75	3.02e-74	-0.385242	0.765651	10.13	2.22e-17	4.96e-17
HIST3H2A	-0.497395	0.708385	10.7083	1.36e-54	1.11e-53	0.851602	1.8045	10.7083	5.1e-105	2.03e-103	-0.0500726	0.965888	10.7083	0.2041	0.228856
CDC7	-0.290817	0.817439	10.397	2.11e-19	5.48e-19	0.846671	1.79835	10.397	9.57e-107	3.96e-105	-0.339048	0.790563	10.397	1.28e-18	2.97e-18
LDHA	-0.819792	0.566523	13.0038	7.13e-138	1.18e-135	0.845262	1.79659	13.0038	1.21e-86	3.37e-85	0.413386	1.33181	13.0038	9.03e-23	2.36e-22
MCM4	-0.107876	0.927953	9.63231	0.000702131	0.000948651	0.845192	1.7965	9.63231	2.44e-112	1.13e-110	-0.597522	0.660888	9.63231	5.26e-60	3.26e-59
EFS	-0.984957	0.505241	10.2478	5.86e-62	6.16e-61	0.841012	1.79131	10.2478	5.27e-28	2.48e-27	0.651706	1.57102	10.2478	2.98e-19	7.06e-19
MRPL11	-0.686277	0.621455	9.39754	6.09e-200	1.01e-196	0.840524	1.7907	9.39754	3.59e-184	8.31e-182	0.227994	1.17121	9.39754	7.84e-14	1.58e-13
CDKN2A	-0.536947	0.689228	9.64761	3.74e-27	1.24e-26	0.84007	1.79014	9.64761	2.09e-41	1.6e-40	0.0163382	1.01139	9.64761	0.786398	0.8024
FANCD2	-0.306319	0.808703	7.60973	3.22e-20	8.61e-20	0.837565	1.78703	7.60973	2.27e-97	7.89e-96	-0.308945	0.807232	7.60973	7.92e-15	1.64e-14
LAGE3	-0.626933	0.647552	12.0412	1.29e-108	6.74e-107	0.8366	1.78584	12.0412	6.4e-123	3.47e-121	0.147206	1.10742	12.0412	4.51e-05	6.51e-05
SSRP1	-0.34429	0.787695	13.9971	5.11e-44	2.87e-43	0.836458	1.78566	13.9971	9.73e-189	2.62e-186	-0.25404	0.838545	13.9971	2.51e-17	5.61e-17
HOXD10	-0.61245	0.654085	7.25648	2.42e-25	7.6e-25	0.834069	1.78271	7.25648	2.82e-29	1.4e-28	0.128888	1.09345	7.25648	0.0703751	0.082824
NKX6-2	-0.372816	0.772274	7.28347	9.04e-08	1.5e-07	0.831892	1.78002	7.28347	1.78e-21	6.5e-21	-0.209476	0.864851	7.28347	0.0119969	0.0150814
CIT	-0.412328	0.75141	11.079	1.23e-30	4.54e-30	0.826387	1.77324	11.079	5.18e-79	1.2e-77	-0.148476	0.902203	11.079	0.000633141	0.000864411
TCF19	-0.231901	0.851512	7.65508	4.29e-14	9.21e-14	0.820768	1.76635	7.65508	2.29e-112	1.06e-110	-0.399704	0.758014	7.65508	2.89e-28	8.71e-28
SH3GL3	-0.29659	0.814174	8.61392	4.24e-06	6.51e-06	0.820162	1.7656	8.61392	2.46e-24	1.01e-23	-0.307302	0.808151	8.61392	6.43e-05	9.22e-05
PRIM1	0.0379345	1.02664	10.4793	0.263074	0.288668	0.819537	1.76484	10.4793	2.43e-91	7.53e-90	-0.781795	0.581643	10.4793	7.77e-94	9.11e-93
TIGD3	-0.258954	0.835694	8.74382	5.54e-17	1.33e-16	0.815001	1.7593	8.74382	2.25e-108	9.7e-107	-0.356165	0.781238	8.74382	3.03e-22	7.81e-22
SIVA1	-0.742482	0.59771	11.7923	1.39e-176	8.5e-174	0.814692	1.75892	11.7923	2.45e-125	1.39e-123	0.330753	1.25767	11.7923	8.3e-22	2.11e-21
HIST3H3	-0.345561	0.787002	11.7971	2.21e-33	9.02e-33	0.813033	1.7569	11.7971	8.97e-125	4.97e-123	-0.231429	0.851791	11.7971	2.57e-11	4.76e-11
WDR62	-0.337761	0.791268	7.1351	3.94e-44	2.22e-43	0.81071	1.75407	7.1351	1.42e-183	3.22e-181	-0.240442	0.846486	7.1351	3e-16	6.49e-16
INSM2	0.320171	1.24848	12.08	8.62e-08	1.43e-07	0.809205	1.75225	12.08	2.25e-27	1.04e-26	-1.17341	0.443371	12.08	1.53e-65	1.06e-64
TAC1	-0.775007	0.584386	5.94823	3.61e-46	2.19e-45	0.80903	1.75203	5.94823	1.94e-31	1.04e-30	0.381969	1.30312	5.94823	8.53e-09	1.44e-08
CRYBA2	-0.40305	0.756258	9.24237	3.95e-08	6.68e-08	0.804173	1.74615	9.24237	2.65e-18	8.49e-18	-0.141922	0.906311	9.24237	0.105935	0.122581
SPA17	-0.547408	0.684248	8.54071	1.5e-34	6.33e-34	0.800831	1.7421	8.54071	2.41e-46	2.17e-45	0.0660455	1.04684	8.54071	0.224404	0.250219
PSRC1	-0.1441	0.904943	9.92337	2.75e-06	4.27e-06	0.800349	1.74152	9.92337	4.09e-107	1.71e-105	-0.506251	0.70405	9.92337	1.17e-45	5.32e-45
HOXD3	-0.202256	0.86919	10.2433	5.89e-08	9.88e-08	0.80009	1.74121	10.2433	8.3e-70	1.51e-68	-0.423436	0.745647	10.2433	7.03e-22	1.79e-21
CDCA3	-0.260638	0.834719	8.49908	5.38e-18	1.34e-17	0.798615	1.73943	8.49908	1.91e-109	8.31e-108	-0.339219	0.790469	8.49908	3.01e-21	7.57e-21
IGF2BP3	-0.00170165	0.998821	11.6693	0.968531	0.97113	0.798494	1.73928	11.6693	1.04e-51	1.1e-50	-0.706819	0.61267	11.6693	1.78e-45	8.03e-45
DMC1	-0.238954	0.847359	6.62225	4.11e-12	8.19e-12	0.798326	1.73908	6.62225	6.56e-82	1.62e-80	-0.369755	0.773914	6.62225	1.47e-19	3.51e-19
ANP32E	-0.497273	0.708445	8.88042	7.52e-66	9.22e-65	0.796016	1.7363	8.88042	2e-110	8.98e-109	-0.000873033	0.999395	8.88042	0.980683	0.983059
HIST1H4I	-0.201267	0.869786	9.49045	2.25e-07	3.67e-07	0.79584	1.73609	9.49045	2.77e-63	4.24e-62	-0.421066	0.746873	9.49045	4.95e-20	1.2e-19
PNMT	-0.278854	0.824246	9.97481	6.71e-06	1.02e-05	0.795307	1.73545	9.97481	8.51e-25	3.54e-24	-0.310414	0.806411	9.97481	2.62e-05	3.83e-05
DNMT1	-0.366204	0.775821	10.5573	1.02e-46	6.33e-46	0.793233	1.73295	10.5573	1.72e-152	1.53e-150	-0.184528	0.879937	10.5573	3.17e-09	5.46e-09
CRYGC	-0.46752	0.723207	8.1699	5.18e-14	1.11e-13	0.79265	1.73225	8.1699	2.96e-24	1.21e-23	-0.0401343	0.972564	8.1699	0.590664	0.617646
GGH	-0.0663902	0.955025	10.7427	0.068092	0.0796194	0.792163	1.73167	10.7427	1.24e-72	2.48e-71	-0.609334	0.655499	10.7427	1.77e-47	8.34e-47
EBP	-0.406778	0.754306	12.0502	4.47e-51	3.19e-50	0.791153	1.73046	12.0502	8.59e-131	5.43e-129	-0.125063	0.916964	12.0502	0.000168255	0.000236718
SLC5A12	-0.48126	0.716352	5.95149	2.59e-29	9.1e-29	0.789596	1.72859	5.95149	2.04e-49	2.04e-48	-0.0179105	0.987662	5.95149	0.730309	0.750526
HIST1H3I	-0.337283	0.791531	10.8961	2.86e-14	6.18e-14	0.788115	1.72682	10.8961	9.97e-47	9.11e-46	-0.221052	0.85794	10.8961	3.21e-05	4.67e-05
LIG1	-0.267729	0.830626	11.906	2.17e-18	5.46e-18	0.784639	1.72266	11.906	1.35e-101	5.09e-100	-0.316735	0.802885	11.906	3.83e-18	8.81e-18
COX8A	-0.475648	0.719144	14.3064	5.28e-78	1.01e-76	0.781126	1.71847	14.3064	6.37e-141	4.67e-139	-0.0183562	0.987357	14.3064	0.564568	0.592385
UNG	-0.284327	0.821124	8.00351	3.15e-24	9.57e-24	0.779396	1.71641	8.00351	1.68e-121	8.74e-120	-0.288508	0.818748	8.00351	7.24e-18	1.65e-17
SPINK5	-0.574056	0.671726	7.48376	3.5e-18	8.75e-18	0.776871	1.71341	7.48376	1.16e-20	4.11e-20	0.125169	1.09064	7.48376	0.115461	0.133153
HIST2H2BE	-0.292729	0.816356	8.91318	1.73e-14	3.77e-14	0.773322	1.7092	8.91318	2.57e-61	3.73e-60	-0.271181	0.828641	8.91318	2.81e-09	4.84e-09
CDK2	-0.492005	0.711036	7.18772	4.6e-90	1.29e-88	0.772907	1.70871	7.18772	2.36e-148	1.91e-146	0.0121712	1.00847	7.18772	0.693306	0.715481
JMJD6	-0.593682	0.66265	9.24942	9.68e-83	2.19e-81	0.772712	1.70848	9.24942	3.75e-88	1.08e-86	0.156733	1.11476	9.24942	4.93e-05	7.11e-05
SOX11	0.00177578	1.00123	11.6672	0.96254	0.965959	0.771036	1.7065	11.6672	2.79e-63	4.26e-62	-0.687369	0.620985	11.6672	2.53e-56	1.44e-55
PPM1D	-0.08836	0.940591	11.2535	0.00709839	0.00898684	0.770486	1.70584	11.2535	1.95e-85	5.17e-84	-0.558881	0.678828	11.2535	4.36e-49	2.13e-48
PSMC3	-0.477574	0.718184	11.7812	2.61e-63	2.89e-62	0.770261	1.70558	11.7812	1.11e-107	4.72e-106	-0.00597104	0.99587	11.7812	0.865598	0.876724
ZNF107	-0.374012	0.771633	9.11369	2.46e-26	7.93e-26	0.769743	1.70497	9.11369	8.44e-71	1.6e-69	-0.152575	0.899643	9.11369	0.000339725	0.00047036
RPS6KA6	-0.0988159	0.933799	7.49197	0.000879559	0.00118093	0.767872	1.70276	7.49197	1.01e-105	4.1e-104	-0.541711	0.686956	7.49197	1.7e-56	9.78e-56
GSTO2	-0.582586	0.667766	7.16151	3.36e-44	1.9e-43	0.767695	1.70255	7.16151	4.36e-48	4.18e-47	0.145433	1.10606	7.16151	0.00445211	0.00576832
PSMC3IP	-0.0498021	0.966069	10.6661	0.125091	0.142261	0.766582	1.70123	10.6661	1.23e-86	3.42e-85	-0.610168	0.65512	10.6661	2.58e-60	1.61e-59
CHAC2	-0.339375	0.790384	8.14509	6.2e-35	2.65e-34	0.766282	1.70088	8.14509	1.35e-119	6.7e-118	-0.198689	0.871342	8.14509	2.56e-09	4.42e-09
CENPJ	0.0447086	1.03147	10.2659	0.19998	0.222428	0.764755	1.69908	10.2659	8.88e-74	1.82e-72	-0.742757	0.597596	10.2659	9.86e-79	8.78e-78
MNS1	-0.377467	0.769788	8.22307	3.54e-31	1.33e-30	0.763558	1.69767	8.22307	3.41e-82	8.52e-81	-0.142176	0.906152	8.22307	0.000309947	0.000430201
SHC3	-0.398532	0.75863	7.5468	2.92e-15	6.56e-15	0.76325	1.69731	7.5468	1.03e-33	5.94e-33	-0.111988	0.925312	7.5468	0.0649205	0.0766148
POLR3K	-0.453914	0.730059	10.8629	7.2e-82	1.56e-80	0.762053	1.6959	10.8629	7.59e-157	7.51e-155	-0.0322788	0.977874	10.8629	0.277679	0.305795
FIGNL1	-0.000416549	0.999711	8.94784	0.989746	0.990687	0.761598	1.69537	8.94784	8.26e-86	2.22e-84	-0.675872	0.625954	8.94784	2.64e-75	2.21e-74
HIST1H4A	-0.161648	0.894003	10.7939	8.54e-07	1.36e-06	0.760262	1.6938	10.7939	1.92e-82	4.8e-81	-0.445726	0.734215	10.7939	5.69e-31	1.84e-30
FGF19	-0.44369	0.735252	6.35219	7.04e-37	3.2e-36	0.759555	1.69297	6.35219	7.53e-69	1.34e-67	-0.0445791	0.969573	6.35219	0.295872	0.324228
RASL10B	-0.300711	0.811852	8.79279	2.61e-19	6.76e-19	0.756091	1.68891	8.79279	8.86e-77	1.94e-75	-0.244542	0.844083	8.79279	1.11e-09	1.94e-09
BANF1	-0.457795	0.728098	11.4814	1.43e-78	2.79e-77	0.755767	1.68853	11.4814	7.53e-144	5.74e-142	-0.0211842	0.985423	11.4814	0.488264	0.517672
CPSF3	-0.213012	0.862734	10.3898	3.04e-14	6.58e-14	0.75573	1.68849	10.3898	1.72e-114	8.15e-113	-0.368759	0.774448	10.3898	7.86e-29	2.41e-28
STIP1	-0.359347	0.779518	10.4998	4.93e-33	1.99e-32	0.755533	1.68826	10.4998	1.88e-95	6.23e-94	-0.160781	0.894541	10.4998	1.01e-05	1.5e-05
SAP30	-0.249851	0.840983	11.7662	2.78e-18	6.97e-18	0.754498	1.68704	11.7662	6.13e-108	2.62e-106	-0.315351	0.803655	11.7662	2.27e-20	5.57e-20
LDHAL6A	-0.234384	0.850048	6.78768	6.22e-05	8.98e-05	0.754364	1.68689	6.78768	5.35e-25	2.24e-24	-0.337197	0.791578	6.78768	1.3e-06	2.02e-06
ITGB3BP	-0.232677	0.851054	9.97341	2.15e-16	5.03e-16	0.751153	1.68314	9.97341	5.8e-110	2.58e-108	-0.336769	0.791813	9.97341	1.2e-23	3.2e-23
MRPS23	-0.279152	0.824075	10.8559	6.63e-25	2.06e-24	0.74952	1.68123	10.8559	1.02e-119	5.11e-118	-0.26932	0.82971	10.8559	1.05e-16	2.3e-16
PCOLCE2	-1.2187	0.42967	6.7665	1.43e-91	4.22e-90	0.749228	1.68089	6.7665	4.26e-21	1.53e-20	1.06516	2.0924	6.7665	1.96e-47	9.23e-47
BRMS1	-0.594501	0.662274	10.1426	3.38e-137	5.22e-135	0.74437	1.67524	10.1426	4.79e-134	3.3e-132	0.18307	1.1353	10.1426	2.97e-09	5.11e-09
LIMD2	-0.492859	0.710616	8.72131	2.88e-76	5.18e-75	0.744014	1.67483	8.72131	5.52e-113	2.59e-111	0.0390475	1.02744	8.72131	0.241782	0.268433
RUVBL1	-0.303311	0.81039	8.18651	5.09e-36	2.24e-35	0.742715	1.67332	8.18651	3.23e-150	2.67e-148	-0.228968	0.853245	8.18651	4.9e-15	1.02e-14
HRAS	-0.403251	0.756152	11.1691	3.61e-31	1.35e-30	0.742158	1.67268	11.1691	4.68e-67	7.97e-66	-0.0865524	0.941771	11.1691	0.0401272	0.0482902
CBX8	-0.332564	0.794124	9.25213	1.77e-20	4.76e-20	0.740708	1.671	9.25213	2.35e-63	3.61e-62	-0.185646	0.879255	9.25213	1.68e-05	2.49e-05
TCF15	-0.551965	0.682091	8.22661	1.02e-85	2.49e-84	0.736913	1.66661	8.22661	1.17e-96	3.98e-95	0.12929	1.09376	8.22661	0.000254018	0.000353896
AHCY	-0.386706	0.764874	9.82284	5.74e-42	3.04e-41	0.729023	1.65752	9.82284	1.01e-97	3.53e-96	-0.0983811	0.934081	9.82284	0.00472254	0.00610845
DPF1	-0.088738	0.940345	8.53314	0.00873215	0.010988	0.727213	1.65544	8.53314	1.39e-70	2.62e-69	-0.519909	0.697416	8.53314	7.88e-40	3.13e-39
MKS1	-0.299735	0.812401	8.34628	1.23e-38	5.91e-38	0.726064	1.65412	8.34628	2.37e-159	2.57e-157	-0.219257	0.859008	8.34628	3.9e-15	8.17e-15
CNIH4	-0.54319	0.686252	11.2421	5.22e-127	5.45e-125	0.725799	1.65382	11.2421	9.76e-145	7.49e-143	0.1267	1.09179	11.2421	1.43e-05	2.12e-05
NETO2	0.0381912	1.02683	9.93258	0.35119	0.379038	0.723919	1.65166	9.93258	5.46e-47	5.05e-46	-0.697231	0.616755	9.93258	3.93e-49	1.93e-48
GPR98	-0.448278	0.732917	6.0215	3.84e-16	8.91e-16	0.721186	1.64854	6.0215	1.91e-25	8.16e-25	-0.00398421	0.997242	6.0215	0.952028	0.957484
STRA6	-0.489513	0.712265	7.8553	6.5e-29	2.25e-28	0.720807	1.6481	7.8553	4.2e-39	2.92e-38	0.0549095	1.03879	7.8553	0.302136	0.330467
PTPN5	-0.610792	0.654837	7.78308	8.65e-30	3.1e-29	0.71856	1.64554	7.78308	6.95e-26	3.02e-25	0.229129	1.17213	7.78308	0.000448803	0.000617398
ICT1	-0.399329	0.758211	12.2224	1e-56	8.82e-56	0.717075	1.64385	12.2224	3.63e-122	1.93e-120	-0.0698436	0.952741	12.2224	0.0245419	0.0300782
SKP2	-0.218656	0.859365	9.19106	5.13e-18	1.28e-17	0.7147	1.64114	9.19106	3.31e-127	1.97e-125	-0.324301	0.798685	9.19106	2.41e-27	7.07e-27
LRBA	-0.424282	0.745209	9.42482	4.94e-47	3.11e-46	0.714632	1.64106	9.42482	3.3e-86	9.01e-85	-0.0322377	0.977902	9.42482	0.372651	0.402238
STAC2	-0.625399	0.64824	7.65549	3.33e-40	1.67e-39	0.713826	1.64015	7.65549	8.99e-33	5.03e-32	0.254078	1.19257	7.65549	9.67e-06	1.44e-05
SST	-0.526151	0.694405	9.84246	3.38e-06	5.23e-06	0.713149	1.63938	9.84246	6.27e-07	1.16e-06	0.113739	1.08203	9.84246	0.400723	0.430413
GAS2L3	-0.48943	0.712307	7.76133	1.57e-51	1.14e-50	0.712045	1.63812	7.76133	3.76e-69	6.73e-68	0.062574	1.04433	7.76133	0.116716	0.134466
NASP	-0.22417	0.856087	12.2817	6.63e-17	1.59e-16	0.711353	1.63734	12.2817	8.45e-110	3.71e-108	-0.313498	0.804688	12.2817	7.44e-23	1.95e-22
ZNF560	-0.201689	0.869532	5.7612	2.11e-07	3.45e-07	0.710871	1.63679	5.7612	4.9e-50	5.01e-49	-0.344995	0.787311	5.7612	7.42e-14	1.49e-13
RFWD3	-0.286422	0.819933	7.60266	8.29e-32	3.19e-31	0.710142	1.63597	7.60266	3.18e-133	2.12e-131	-0.224022	0.856175	7.60266	2.63e-14	5.36e-14
PPP1CA	-0.601198	0.659206	11.6436	9.03e-110	4.91e-108	0.710098	1.63591	11.6436	3.53e-94	1.15e-92	0.223022	1.16718	11.6436	8.06e-11	1.47e-10
TDP1	-0.334122	0.793267	10.1582	4.5e-40	2.24e-39	0.70906	1.63474	10.1582	1.99e-121	1.03e-119	-0.155322	0.897932	10.1582	4.22e-07	6.71e-07
SNRPB	-0.343795	0.787966	11.929	2.24e-45	1.32e-44	0.708986	1.63465	11.929	4.69e-131	3.02e-129	-0.141521	0.906563	11.929	1.93e-06	2.97e-06
CABP7	-0.996676	0.501153	7.87106	1.58e-42	8.46e-42	0.707026	1.63244	7.87106	5.22e-14	1.39e-13	0.787356	1.72591	7.87106	4.53e-19	1.07e-18
HPDL	-0.264546	0.83246	8.75217	1.58e-13	3.34e-13	0.705989	1.63126	8.75217	7.49e-58	9.74e-57	-0.251397	0.840082	8.75217	4.4e-09	7.53e-09
TKTL2	-0.394196	0.760914	6.3017	2.97e-33	1.2e-32	0.703904	1.62891	6.3017	1.99e-67	3.44e-66	-0.0654345	0.955657	6.3017	0.101031	0.117283
RPA3	-0.354095	0.78236	11.4933	7.35e-34	3.04e-33	0.703521	1.62847	11.4933	1.39e-86	3.84e-85	-0.12204	0.918887	11.4933	0.000580509	0.000794146
ZNF256	-0.513382	0.700578	9.09274	2.48e-91	7.28e-90	0.702922	1.6278	9.09274	3.6e-109	1.56e-107	0.10469	1.07526	9.09274	0.00105063	0.00141456
ACTN2	-0.275326	0.826264	10.1064	0.000393937	0.000540445	0.70161	1.62632	10.1064	6.82e-13	1.73e-12	-0.2322	0.851336	10.1064	0.0122082	0.0153321
TFRC	-0.559966	0.678318	11.7092	2.38e-55	2e-54	0.70007	1.62458	11.7092	4.62e-54	5.29e-53	0.173375	1.12769	11.7092	8.16e-05	0.000116363
SLC16A10	-0.287956	0.819062	7.15709	3.04e-14	6.56e-14	0.695701	1.61967	7.15709	6.16e-50	6.27e-49	-0.209016	0.865127	7.15709	4.16e-06	6.32e-06
MCM5	-0.346913	0.786265	9.85315	2.59e-32	1.02e-31	0.693085	1.61674	9.85315	3.19e-83	8.14e-82	-0.122969	0.918296	9.85315	0.000548423	0.000750961
C5orf34	-0.0183078	0.98739	7.74673	0.534666	0.562849	0.69304	1.61669	7.74673	7.5e-86	2.03e-84	-0.589571	0.664541	7.74673	8.12e-69	5.94e-68
TRIAP1	-0.398313	0.758745	10.2462	9.82e-62	1.02e-60	0.692235	1.61579	10.2462	2.28e-124	1.26e-122	-0.0492227	0.966457	10.2462	0.0982008	0.114168
CRB1	-0.388463	0.763943	5.96514	9.32e-17	2.22e-16	0.691199	1.61463	5.96514	3.18e-32	1.75e-31	-0.0622905	0.957742	5.96514	0.267976	0.295842
C14orf80	-0.391116	0.76254	8.97737	1.66e-44	9.46e-44	0.689636	1.61288	8.97737	7.79e-90	2.34e-88	-0.0571348	0.961171	8.97737	0.0951674	0.110753
SLC16A1	-0.449881	0.732103	8.33197	1.4e-80	2.86e-79	0.688835	1.61198	8.33197	8.69e-124	4.75e-122	0.0270263	1.01891	8.33197	0.36264	0.39209
USP1	-0.167973	0.890092	12.0246	1.3e-09	2.34e-09	0.688599	1.61172	12.0246	3.59e-96	1.21e-94	-0.373092	0.772126	12.0246	1.98e-30	6.32e-30
KDELC1	-0.184505	0.879951	9.19827	1.38e-10	2.59e-10	0.688006	1.61106	9.19827	3.56e-88	1.03e-86	-0.349088	0.78508	9.19827	8.17e-25	2.25e-24
C19orf40	-0.368902	0.774371	6.22853	2.04e-48	1.34e-47	0.687594	1.6106	6.22853	1.34e-111	6.1e-110	-0.0868659	0.941566	6.22853	0.00502947	0.00649458
TMEM104	-0.488879	0.712578	10.4311	8.81e-82	1.9e-80	0.686628	1.60952	10.4311	3.44e-103	1.33e-101	0.0843681	1.06022	10.4311	0.00840583	0.0106912
MSI2	-0.426531	0.744048	8.49779	5.68e-59	5.4e-58	0.681627	1.60395	8.49779	9.48e-98	3.34e-96	0.000271775	1.00019	8.49779	0.993346	0.994033
MAL2	-0.77326	0.585094	6.90594	1.94e-28	6.63e-28	0.679434	1.60151	6.90594	2.63e-14	7.11e-14	0.494597	1.40893	6.90594	4.56e-09	7.79e-09
RBBP8	-0.196894	0.872427	10.6015	1.14e-10	2.16e-10	0.679049	1.60108	10.6015	4.2e-75	8.82e-74	-0.32354	0.799107	10.6015	3.93e-19	9.3e-19
ACN9	-0.31101	0.806077	10.3406	9.12e-31	3.38e-30	0.678925	1.60095	10.3406	9.01e-96	3e-94	-0.161376	0.894172	10.3406	7.68e-07	1.2e-06
TBX2	-0.134261	0.911137	12.975	0.00313771	0.00406398	0.678725	1.60072	12.975	2.09e-33	1.2e-32	-0.412196	0.751479	12.975	1.78e-14	3.64e-14
EXOSC9	-0.365846	0.776014	11.1878	3.08e-57	2.76e-56	0.678541	1.60052	11.1878	4.25e-133	2.81e-131	-0.0831646	0.943985	11.1878	0.00331889	0.00433352
GFRA2	-0.445845	0.734154	10.489	2.79e-14	6.04e-14	0.677882	1.59979	10.489	4.2e-20	1.45e-19	0.0310246	1.02174	10.489	0.659525	0.683237
CENPQ	-0.109282	0.92705	9.77308	0.000127279	0.000180272	0.677421	1.59928	9.77308	1.88e-87	5.3e-86	-0.446509	0.733817	9.77308	2.84e-41	1.17e-40
DYDC2	-0.3076	0.807985	6.37687	1.14e-21	3.18e-21	0.67738	1.59923	6.37687	7.19e-66	1.19e-64	-0.164847	0.892023	6.37687	2.09e-05	3.07e-05
COL9A1	-0.339166	0.790498	7.78684	4.05e-22	1.15e-21	0.676707	1.59849	7.78684	8.84e-55	1.04e-53	-0.119423	0.920556	7.78684	0.00476872	0.00616612
FAM122B	-0.586025	0.666176	8.08679	3.9e-100	1.5e-98	0.676703	1.59848	8.08679	6.06e-82	1.5e-80	0.231136	1.17376	8.08679	3.21e-11	5.91e-11
DLK1	0.0741579	1.05275	9.2701	0.414038	0.442784	0.675342	1.59697	9.2701	3.38e-09	7.15e-09	-0.705159	0.613375	9.2701	5.45e-11	9.98e-11
PDSS1	-0.11046	0.926293	9.72409	0.000192779	0.000269746	0.674849	1.59643	9.72409	7.9e-80	1.86e-78	-0.442551	0.735833	9.72409	1.46e-37	5.51e-37
ORAOV1	-0.24738	0.842425	9.27769	1.85e-16	4.34e-16	0.671882	1.59315	9.27769	2.16e-75	4.57e-74	-0.245479	0.843536	9.27769	8.26e-12	1.55e-11
ELOVL6	-0.256319	0.837221	8.56696	4.41e-23	1.29e-22	0.67005	1.59113	8.56696	6.46e-103	2.49e-101	-0.231158	0.851951	8.56696	9.89e-14	1.98e-13
KCNB2	0.072819	1.05177	7.91638	0.100261	0.115199	0.669882	1.59094	7.91638	2.66e-34	1.57e-33	-0.698408	0.616252	7.91638	5.33e-42	2.25e-41
HSD11B2	-0.443746	0.735223	8.36577	1.54e-26	4.99e-26	0.669847	1.5909	8.36577	1.25e-37	8.27e-37	0.035181	1.02469	8.36577	0.485262	0.514678
CCND1	0.0430354	1.03028	11.9096	0.307017	0.33407	0.669846	1.5909	11.9096	6.13e-38	4.1e-37	-0.656081	0.6346	11.9096	5.35e-41	2.18e-40
MPHOSPH9	-0.197839	0.871856	8.60915	2.58e-15	5.82e-15	0.669399	1.59041	8.60915	1.72e-112	8e-111	-0.313626	0.804617	8.60915	3.04e-26	8.7e-26
CDC25B	-0.405597	0.754924	10.9271	7.11e-49	4.73e-48	0.66915	1.59014	10.9271	7.75e-86	2.09e-84	-0.0183751	0.987344	10.9271	0.588104	0.615135
CLP1	-0.430508	0.742001	9.59809	2.69e-68	3.59e-67	0.668346	1.58925	9.59809	4.27e-107	1.78e-105	0.0177141	1.01235	9.59809	0.563722	0.591609
HIST1H2AG	-0.559194	0.678681	8.22743	3.92e-123	3.66e-121	0.665881	1.58654	8.22743	2.72e-107	1.14e-105	0.202647	1.15081	8.22743	2.44e-11	4.52e-11
TNNI3	-0.38358	0.766533	6.88206	3.39e-28	1.15e-27	0.664593	1.58512	6.88206	4.49e-53	4.98e-52	-0.0455929	0.968892	6.88206	0.280396	0.308611
PLAGL2	-0.159023	0.895631	9.62156	1.44e-08	2.49e-08	0.664285	1.58478	9.62156	2.27e-86	6.22e-85	-0.364205	0.776897	9.62156	2.58e-28	7.78e-28
ARID3B	-0.0381964	0.973872	11.5806	0.272324	0.298281	0.662074	1.58236	11.5806	1.02e-54	1.19e-53	-0.533824	0.690722	11.5806	8.89e-40	3.52e-39
CPEB1	-0.867145	0.548231	8.34686	1.86e-35	8.05e-35	0.661989	1.58226	8.34686	1.4e-13	3.67e-13	0.643415	1.56202	8.34686	2.31e-14	4.72e-14
DYNLL2	-0.380948	0.767933	10.5923	1.11e-44	6.34e-44	0.659738	1.5798	10.5923	1.02e-86	2.85e-85	-0.0450174	0.969278	10.5923	0.176263	0.199205
PPAT	-0.138244	0.908625	9.30951	1.01e-06	1.61e-06	0.659731	1.57979	9.30951	7.59e-84	1.96e-82	-0.389668	0.763305	9.30951	6.56e-32	2.18e-31
MRPL21	-0.339945	0.790071	12.4993	1.09e-39	5.38e-39	0.65828	1.5782	12.4993	1.56e-97	5.44e-96	-0.101949	0.931773	12.4993	0.00119177	0.00159771
HIST1H2AB	-0.102685	0.931298	8.68773	0.00120401	0.00160299	0.658218	1.57813	8.68773	1.79e-65	2.92e-64	-0.43882	0.737738	8.68773	2.71e-32	9.1e-32
NMNAT3	-0.617824	0.651653	7.95398	2.85e-22	8.12e-22	0.657768	1.57764	7.95398	3.98e-16	1.17e-15	0.293112	1.22528	7.95398	0.000133431	0.000188664
ZDHHC23	-0.79092	0.577976	7.95331	1.7e-100	6.61e-99	0.657703	1.57757	7.95331	2.31e-41	1.76e-40	0.538978	1.45294	7.95331	2.66e-31	8.71e-31
HOXD8	-0.273471	0.827326	9.73473	3.91e-18	9.75e-18	0.656045	1.57576	9.73473	1.19e-64	1.89e-63	-0.194362	0.87396	9.73473	2.73e-07	4.37e-07
RET	-0.480504	0.716727	7.39427	5.74e-14	1.23e-13	0.655031	1.57465	7.39427	4.99e-16	1.46e-15	0.10054	1.07217	7.39427	0.190548	0.214408
ING2	-0.477033	0.718454	9.89127	6.31e-65	7.42e-64	0.654878	1.57448	9.89127	2.08e-77	4.66e-76	0.0957455	1.06862	9.89127	0.0059111	0.00760421
REC8	-0.132829	0.912041	12.2978	1.81e-05	2.68e-05	0.654841	1.57444	12.2978	6.83e-68	1.19e-66	-0.393014	0.761537	12.2978	3.53e-27	1.03e-26
WDR54	-0.12146	0.919257	11.3854	3.02e-06	4.69e-06	0.652745	1.57216	11.3854	1.51e-98	5.35e-97	-0.407298	0.754034	11.3854	3.39e-41	1.4e-40
HIRIP3	-0.115726	0.922918	8.92778	1e-05	1.51e-05	0.652677	1.57208	8.92778	4.9e-97	1.68e-95	-0.415379	0.749822	8.92778	2.8e-42	1.19e-41
C17orf80	-0.0999518	0.933064	10.3848	0.000272934	0.000378021	0.652413	1.57179	10.3848	1.55e-87	4.37e-86	-0.437545	0.73839	10.3848	8.75e-43	3.74e-42
RLN2	-0.488153	0.712937	6.32015	5.6e-50	3.84e-49	0.649808	1.56896	6.32015	1.38e-55	1.65e-54	0.11604	1.08376	6.32015	0.00402592	0.00523135
TAF10	-0.703097	0.614252	10.4001	8.07e-158	2.53e-155	0.649302	1.56841	10.4001	5.24e-77	1.16e-75	0.421725	1.33953	10.4001	1.21e-35	4.36e-35
CBX1	-0.150183	0.901136	12.6118	2.38e-06	3.71e-06	0.648382	1.56741	12.6118	1.06e-62	1.59e-61	-0.362633	0.777744	12.6118	4.51e-22	1.16e-21
HIST1H2BJ	-0.32802	0.796629	7.08748	9.51e-35	4.03e-34	0.648217	1.56723	7.08748	4.72e-88	1.35e-86	-0.109946	0.926623	7.08748	0.00069966	0.000953094
POU6F2	-0.322471	0.799699	6.89333	6.68e-18	1.66e-17	0.646777	1.56567	6.89333	5.58e-44	4.68e-43	-0.116547	0.922393	6.89333	0.009623	0.0121884
MXD3	-0.20183	0.869447	9.95124	5.84e-12	1.16e-11	0.645672	1.56447	9.95124	1.93e-73	3.91e-72	-0.286884	0.819671	9.95124	1.79e-16	3.91e-16
SCML2	-0.150639	0.900851	6.54355	5.03e-11	9.64e-11	0.644203	1.56288	6.54355	1.1e-126	6.43e-125	-0.358274	0.780097	6.54355	8.96e-41	3.63e-40
STEAP2	-1.11382	0.462068	6.99248	2.79e-104	1.29e-102	0.643587	1.56221	6.99248	6.04e-21	2.16e-20	1.01006	2.01399	6.99248	9.79e-58	5.77e-57
SASS6	-0.019504	0.986572	8.08943	0.485719	0.514678	0.643545	1.56216	8.08943	6.78e-82	1.67e-80	-0.54391	0.68591	8.08943	7.88e-65	5.38e-64
DONSON	-0.183095	0.880811	9.97382	4.11e-12	8.18e-12	0.64353	1.56215	9.97382	1.47e-91	4.59e-90	-0.311587	0.805755	9.97382	1.96e-23	5.2e-23
GPX7	-0.242898	0.845046	10.1676	7.5e-18	1.85e-17	0.643136	1.56172	10.1676	2e-78	4.56e-77	-0.226313	0.854817	10.1676	2.06e-11	3.83e-11
SMC1A	-0.139871	0.9076	11.2572	1.5e-08	2.59e-08	0.639582	1.55788	11.2572	2.4e-105	9.66e-104	-0.369461	0.774072	11.2572	1.91e-37	7.15e-37
TTF2	-0.326053	0.797716	6.97275	4.61e-50	3.18e-49	0.639315	1.55759	6.97275	2.68e-130	1.68e-128	-0.104832	0.929913	6.97275	9.73e-05	0.000138343
H2AFY2	0.207218	1.15446	11.076	2.43e-09	4.35e-09	0.638123	1.5563	11.076	2.29e-50	2.36e-49	-0.861054	0.55055	11.076	4.11e-109	6.47e-108
NUP37	-0.401656	0.756989	9.56958	5.51e-68	7.27e-67	0.637048	1.55514	9.56958	6.79e-112	3.11e-110	0.00454255	1.00315	9.56958	0.874194	0.884426
GEMIN6	-0.356574	0.781017	10.7288	4.43e-46	2.67e-45	0.634684	1.5526	10.7288	2.92e-95	9.67e-94	-0.0573769	0.96101	10.7288	0.0614922	0.0727542
EIF4EBP1	-0.170527	0.888518	11.6501	1.5e-08	2.58e-08	0.632135	1.54986	11.6501	1.33e-66	2.24e-65	-0.319313	0.801451	11.6501	3.27e-19	7.74e-19
MRPS7	-0.29919	0.812708	10.81	6.64e-32	2.57e-31	0.6311	1.54875	10.81	1.86e-92	5.89e-91	-0.135683	0.910239	10.81	1.09e-05	1.63e-05
FANCM	-0.167642	0.890296	8.113	1.79e-11	3.49e-11	0.631082	1.54873	8.113	1.18e-99	4.27e-98	-0.322474	0.799698	8.113	5.42e-28	1.62e-27
E2F6	-0.134459	0.911012	10.0812	4.57e-08	7.71e-08	0.630799	1.54842	10.0812	3e-103	1.16e-101	-0.369345	0.774134	10.0812	8.56e-38	3.25e-37
RBM28	-0.441202	0.736521	10.3043	1.56e-77	2.92e-76	0.62898	1.54647	10.3043	5.7e-101	2.11e-99	0.0678665	1.04817	10.3043	0.0219443	0.0269888
EFCAB2	-0.14198	0.906274	9.05715	4.45e-06	6.84e-06	0.628346	1.54579	9.05715	2.48e-62	3.65e-61	-0.356486	0.781065	9.05715	1.46e-22	3.8e-22
CARTPT	-0.199085	0.871103	9.42083	0.038649	0.0462375	0.62771	1.54511	9.42083	2.3e-07	4.39e-07	-0.274829	0.826548	9.42083	0.0165685	0.0205694
FUT1	-0.458046	0.727972	8.59336	2.38e-13	4.98e-13	0.625865	1.54314	8.59336	2.26e-15	6.41e-15	0.0945528	1.06773	8.59336	0.207863	0.232873
NME4	-0.397365	0.759244	9.92463	3.37e-57	3.02e-56	0.625284	1.54251	9.92463	1.96e-91	6.1e-90	0.00889763	1.00619	9.92463	0.772731	0.789568
FANCG	-0.061033	0.958578	11.7453	0.0177688	0.0218766	0.622995	1.54007	11.7453	2.32e-91	7.21e-90	-0.466683	0.723626	11.7453	7.1e-56	4.01e-55
PRMT5	-0.335526	0.792495	10.2796	1.45e-41	7.61e-41	0.622949	1.54002	10.2796	1.86e-93	5.99e-92	-0.0768443	0.948129	10.2796	0.0113808	0.0143302
SF3B3	-0.139339	0.907935	10.1683	8.54e-07	1.36e-06	0.622315	1.53934	10.1683	1.03e-73	2.11e-72	-0.35488	0.781935	10.1683	1.61e-26	4.64e-26
GALK1	-0.475134	0.7194	9.26051	1.43e-56	1.25e-55	0.621628	1.53861	9.26051	9.34e-61	1.33e-59	0.122582	1.08868	9.26051	0.000915472	0.00123834
BRI3BP	-0.43668	0.738833	8.47912	6.11e-69	8.24e-68	0.620681	1.5376	8.47912	8.18e-89	2.42e-87	0.0688168	1.04886	8.47912	0.0262584	0.032097
HOXD1	-0.547612	0.684152	8.13611	4.37e-55	3.64e-54	0.619231	1.53606	8.13611	8.67e-44	7.21e-43	0.227636	1.17091	8.13611	1.24e-07	2.02e-07
HSD17B10	-0.371188	0.773146	12.722	1.53e-58	1.43e-57	0.618825	1.53562	12.722	1.15e-106	4.73e-105	-0.0225383	0.984499	12.722	0.428388	0.458016
CCNE1	-0.28686	0.819684	10.3113	1.7e-32	6.73e-32	0.61835	1.53512	10.3113	4.62e-99	1.65e-97	-0.141867	0.906345	10.3113	1.28e-06	1.98e-06
NUP107	-0.139441	0.907871	12.1534	6.75e-08	1.13e-07	0.618307	1.53507	12.1534	1.59e-88	4.64e-87	-0.351174	0.783946	12.1534	5.13e-31	1.66e-30
MCM7	0.123061	1.08904	14.543	0.000163417	0.000229855	0.618086	1.53484	14.543	6e-54	6.84e-53	-0.723749	0.605522	14.543	1.21e-85	1.21e-84
MTHFD1	-0.364501	0.776738	11.5214	1.36e-49	9.21e-49	0.614904	1.53146	11.5214	1.42e-91	4.44e-90	-0.0285518	0.980404	11.5214	0.345601	0.374856
EXOSC3	-0.352456	0.78325	10.3094	2.47e-52	1.85e-51	0.614004	1.5305	10.3094	2.7e-104	1.06e-102	-0.0448565	0.969386	10.3094	0.115662	0.133371
GINS3	-0.221974	0.857391	9.21826	8.6e-20	2.26e-19	0.612903	1.52933	9.21826	4.86e-97	1.67e-95	-0.229172	0.853125	9.21826	3.7e-15	7.74e-15
SNRPD1	-0.197472	0.872077	12.7239	2.93e-20	7.84e-20	0.611666	1.52802	12.7239	8.08e-130	5.01e-128	-0.262868	0.83343	12.7239	4.98e-25	1.38e-24
PLS1	-0.316479	0.803027	6.28492	1.04e-20	2.82e-20	0.61161	1.52796	6.28492	9.4e-48	8.93e-47	-0.0938203	0.937038	6.28492	0.0217719	0.0267825
CCDC86	-0.525585	0.694678	9.34216	1.24e-116	8.66e-115	0.611513	1.52786	9.34216	1.31e-96	4.46e-95	0.20321	1.15126	9.34216	3.35e-12	6.36e-12
RASSF7	-0.502123	0.706067	9.01639	5.9e-43	3.21e-42	0.610466	1.52675	9.01639	1.11e-39	7.93e-39	0.170824	1.1257	9.01639	0.000130463	0.000184557
FGFR2	-0.468757	0.722587	6.00642	5.81e-29	2.01e-28	0.610233	1.52651	6.00642	1.15e-30	5.97e-30	0.123648	1.08949	6.00642	0.0150863	0.0187897
PRPF19	-0.447861	0.733129	9.81588	1.83e-46	1.13e-45	0.608616	1.5248	9.81588	6.82e-54	7.76e-53	0.0954104	1.06837	9.81588	0.0128923	0.0161554
PRTFDC1	0.0748909	1.05328	10.8409	0.0443352	0.0527568	0.608364	1.52453	10.8409	5.07e-40	3.66e-39	-0.646709	0.638736	10.8409	3.73e-51	1.9e-50
TSSC4	-0.470961	0.721484	10.5507	2e-81	4.24e-80	0.608126	1.52428	10.5507	3.07e-85	8.12e-84	0.12865	1.09327	10.5507	3.06e-05	4.45e-05
TMTC1	-0.631004	0.645727	9.22473	9.53e-45	5.48e-44	0.607527	1.52365	9.22473	4.73e-26	2.07e-25	0.356454	1.28027	9.22473	7.64e-11	1.39e-10
SLC25A39	-0.449906	0.732091	11.1912	1.77e-74	2.97e-73	0.606208	1.52225	11.1912	1.7e-85	4.54e-84	0.100453	1.07211	11.1912	0.00108653	0.00146171
CEP70	-0.116799	0.922231	8.4714	6.56e-07	1.05e-06	0.605159	1.52115	8.4714	1.55e-104	6.09e-103	-0.371649	0.772899	8.4714	4.56e-42	1.93e-41
ZNF511	-0.392467	0.761826	10.2601	6.86e-72	1.05e-70	0.605154	1.52114	10.2601	2.26e-111	1.02e-109	0.0198218	1.01383	10.2601	0.467916	0.497601
HIST1H2AC	-0.344105	0.787796	8.90117	4.78e-23	1.4e-22	0.604824	1.52079	8.90117	3.98e-44	3.35e-43	-0.0485619	0.9669	8.90117	0.248242	0.27521
SAE1	-0.233517	0.850559	10.7702	4.28e-27	1.41e-26	0.604249	1.52019	10.7702	1.48e-121	7.75e-120	-0.205093	0.867483	10.7702	3.18e-15	6.68e-15
SNRPF	-0.30083	0.811785	12.6816	1.18e-44	6.75e-44	0.602503	1.51835	12.6816	3.41e-120	1.72e-118	-0.107954	0.927903	12.6816	3.88e-05	5.62e-05
KPNB1	-0.248774	0.841611	12.7818	2.33e-24	7.1e-24	0.6024	1.51824	12.7818	2.37e-92	7.49e-91	-0.181785	0.881611	12.7818	6.15e-10	1.09e-09
ZNF503	-0.555106	0.680607	9.68484	2.13e-52	1.6e-51	0.601517	1.51731	9.68484	2.87e-38	1.94e-37	0.254012	1.19252	9.68484	1.31e-08	2.2e-08
DNAL1	-0.4233	0.745717	7.27953	3.56e-67	4.56e-66	0.600115	1.51584	7.27953	5.6e-86	1.52e-84	0.068083	1.04832	7.27953	0.0250449	0.0306784
DNMT3A	-0.218343	0.859552	9.40043	1.56e-16	3.68e-16	0.599376	1.51506	9.40043	1.51e-77	3.39e-76	-0.222314	0.857189	9.40043	2.04e-12	3.92e-12
NUP93	-0.351103	0.783985	8.13592	8.9e-59	8.38e-58	0.598956	1.51462	8.13592	6.84e-113	3.2e-111	-0.0334132	0.977106	8.13592	0.213577	0.238859
MARCO	-1.41049	0.376185	7.96066	1.11e-92	3.43e-91	0.598052	1.51367	7.96066	8.43e-11	1.94e-10	1.47179	2.77365	7.96066	1.86e-69	1.37e-68
SYCP2	-0.19173	0.875555	7.55435	1.42e-05	2.12e-05	0.59756	1.51316	7.55435	1.94e-27	8.95e-27	-0.258493	0.83596	7.55435	8.89e-07	1.39e-06
C8orf48	-0.320121	0.801003	6.82884	3.93e-20	1.05e-19	0.597395	1.51298	6.82884	3.93e-43	3.21e-42	-0.076022	0.94867	6.82884	0.0702824	0.0827234
CEP72	0.0750796	1.05342	10.0778	0.011368	0.0141861	0.597354	1.51294	10.0778	1.64e-61	2.38e-60	-0.637197	0.642961	10.0778	3.81e-80	3.47e-79
IPO4	-0.449868	0.73211	9.52779	1.62e-52	1.22e-51	0.595324	1.51081	9.52779	9.96e-58	1.29e-56	0.110067	1.07928	9.52779	0.0024245	0.00319053
LSM5	-0.157021	0.896875	11.9192	2.36e-10	4.4e-10	0.594909	1.51038	11.9192	8.57e-89	2.53e-87	-0.305427	0.809202	11.9192	1.54e-25	4.32e-25
MTA2	-0.396481	0.759709	9.93209	2.67e-66	3.33e-65	0.594826	1.51029	9.93209	4.11e-96	1.38e-94	0.0346964	1.02434	9.93209	0.22589	0.251779
RAN	-0.163132	0.893084	11.3449	7.89e-12	1.55e-11	0.594161	1.50959	11.3449	3.24e-96	1.09e-94	-0.296085	0.81446	11.3449	7.36e-26	2.08e-25
ACTL6A	-0.213687	0.862331	9.27269	8.38e-24	2.51e-23	0.594049	1.50948	9.27269	6.97e-123	3.76e-121	-0.224195	0.856073	9.27269	1.08e-18	2.52e-18
RPL27A	-0.334884	0.792848	11.9992	9.8e-44	5.45e-43	0.59163	1.50695	11.9992	1.59e-88	4.64e-87	-0.0499383	0.965978	11.9992	0.0912409	0.106419
PAICS	-0.0466836	0.968159	11.3348	0.123049	0.140008	0.590674	1.50595	11.3348	1.23e-57	1.58e-56	-0.458352	0.727817	11.3348	1.01e-38	3.9e-38
HDGF	-0.24851	0.841765	11.9432	1.02e-24	3.14e-24	0.590559	1.50583	11.9432	4.24e-90	1.28e-88	-0.171643	0.887831	11.9432	3.88e-09	6.65e-09
PARD6A	-0.316945	0.802768	10.1615	1.02e-30	3.77e-30	0.590399	1.50566	10.1615	1.01e-67	1.75e-66	-0.0743183	0.949791	10.1615	0.0260217	0.0318144
C21orf58	-0.233742	0.850426	9.07743	8.59e-22	2.41e-21	0.589944	1.50519	9.07743	5.33e-89	1.58e-87	-0.192068	0.87535	9.07743	5.09e-11	9.34e-11
FAM104B	-0.592544	0.663172	9.05646	7.42e-125	7.34e-123	0.58914	1.50435	9.05646	4.54e-73	9.15e-72	0.318169	1.24675	9.05646	1.09e-23	2.92e-23
MRPL12	-0.269778	0.829447	10.7734	2.6e-32	1.02e-31	0.588654	1.50384	10.7734	3.8e-101	1.42e-99	-0.139749	0.907677	10.7734	4.19e-07	6.65e-07
CSRP2	-0.598625	0.660383	11.8231	6.12e-73	9.74e-72	0.587598	1.50274	11.8231	4.86e-43	3.95e-42	0.328174	1.25542	11.8231	1.19e-15	2.52e-15
RNASEH2B	-0.277118	0.825238	10.3514	5.76e-27	1.89e-26	0.586633	1.50174	10.3514	3.22e-77	7.15e-76	-0.12753	0.915397	10.3514	4.24e-05	6.13e-05
LIX1	-0.338234	0.791009	6.24813	2.51e-10	4.68e-10	0.586066	1.50115	6.24813	2.93e-18	9.36e-18	-0.0402371	0.972495	6.24813	0.530039	0.558537
HIST1H4F	-0.14895	0.901907	9.29791	0.000159421	0.000224371	0.58594	1.50102	9.29791	5.26e-33	2.97e-32	-0.308922	0.807245	9.29791	4.12e-11	7.56e-11
TSEN54	-0.268244	0.830329	11.3401	4.31e-23	1.26e-22	0.585652	1.50072	11.3401	2e-69	3.6e-68	-0.13926	0.907985	11.3401	2.02e-05	2.98e-05
COMMD4	-0.325185	0.798196	9.67921	4.01e-50	2.78e-49	0.585519	1.50058	9.67921	3.42e-107	1.44e-105	-0.0582833	0.960406	9.67921	0.0299744	0.0364776
SENP2	-0.291219	0.817211	9.03742	2.07e-43	1.14e-42	0.585145	1.50019	9.03742	2.87e-117	1.39e-115	-0.106185	0.929042	9.03742	3.74e-05	5.42e-05
KBTBD8	-0.366642	0.775586	7.31211	1.39e-37	6.51e-37	0.585055	1.5001	7.31211	1.55e-60	2.19e-59	0.00100054	1.00069	7.31211	0.977139	0.979846
MRPL33	-0.333026	0.79387	11.1438	2.09e-43	1.15e-42	0.584174	1.49918	11.1438	1.92e-86	5.29e-85	-0.0459541	0.968649	11.1438	0.11949	0.137511
C2orf44	-0.00592076	0.995904	9.45123	0.817909	0.833452	0.584045	1.49905	9.45123	1.14e-79	2.67e-78	-0.510351	0.702052	9.45123	9.86e-68	7.11e-67
DCLRE1B	-0.0825177	0.944408	8.86629	0.00383376	0.00493186	0.584006	1.49901	8.86629	1.37e-63	2.13e-62	-0.401543	0.757048	8.86629	2.12e-33	7.31e-33
ODF2	-0.276826	0.825405	9.16262	3.48e-37	1.6e-36	0.583939	1.49894	9.16262	6.15e-110	2.73e-108	-0.125553	0.916653	9.16262	2e-06	3.08e-06
DLL3	0.0311473	1.02182	8.03359	0.538416	0.566283	0.58355	1.49853	8.03359	2.76e-20	9.64e-20	-0.56255	0.677104	8.03359	3.55e-21	8.91e-21
RFC2	-0.0750351	0.949319	9.88974	0.00522847	0.00666902	0.582115	1.49704	9.88974	8.56e-72	1.67e-70	-0.410489	0.752368	9.88974	2.29e-39	8.97e-39
SUV420H1	-0.110797	0.926076	9.75587	0.00010193	0.000145258	0.580611	1.49548	9.75587	8.45e-63	1.27e-61	-0.358368	0.780047	9.75587	1.02e-26	2.95e-26
CCNJ	-0.109811	0.92671	9.75051	1.48e-05	2.2e-05	0.580385	1.49525	9.75051	1.29e-80	3.08e-79	-0.359569	0.779397	9.75051	7.69e-34	2.68e-33
C20orf85	-0.348498	0.785401	6.75323	2.93e-26	9.41e-26	0.580222	1.49508	6.75323	2.31e-45	2.03e-44	-0.0204719	0.98591	6.75323	0.607085	0.633273
AJAP1	-0.265046	0.832172	8.35115	6.55e-07	1.05e-06	0.579394	1.49422	8.35115	4.63e-18	1.47e-17	-0.138243	0.908625	8.35115	0.0299362	0.036435
SNRPA	-0.20991	0.864591	11.1084	1.53e-25	4.85e-25	0.57653	1.49126	11.1084	4.1e-130	2.55e-128	-0.213996	0.862146	11.1084	5.68e-19	1.34e-18
C11orf48	-0.480563	0.716698	11.3758	9.53e-101	3.73e-99	0.57623	1.49095	11.3758	1.58e-89	4.7e-88	0.170615	1.12554	11.3758	2.19e-09	3.78e-09
ALMS1	-0.0449972	0.969292	10.3702	0.0600013	0.0705221	0.576169	1.49089	10.3702	1.77e-90	5.4e-89	-0.447864	0.733128	10.3702	8.24e-60	5.07e-59
EID3	-0.126818	0.915849	9.22393	3e-05	4.4e-05	0.575844	1.49055	9.22393	5.4e-54	6.18e-53	-0.331385	0.794773	9.22393	2.42e-20	5.93e-20
TAC3	-0.33802	0.791126	9.48265	2.85e-06	4.42e-06	0.575762	1.49046	9.48265	2.57e-10	5.75e-10	-0.0313901	0.978477	9.48265	0.7161	0.737034
SLC16A2	-0.505275	0.704526	9.61139	4.32e-71	6.34e-70	0.574879	1.48955	9.61139	6.93e-57	8.71e-56	0.206908	1.15421	9.61139	4.01e-09	6.87e-09
RUVBL2	-0.207343	0.866131	11.3766	2.23e-16	5.23e-16	0.574858	1.48953	11.3766	2.32e-78	5.28e-77	-0.216157	0.860856	11.3766	7.79e-13	1.51e-12
LRRC59	-0.2959	0.814564	11.4098	8.52e-41	4.35e-40	0.57445	1.48911	11.4098	3.85e-101	1.44e-99	-0.0900373	0.939498	11.4098	0.000856882	0.00116112
TPCN2	-0.26712	0.830977	8.68058	3.63e-16	8.43e-16	0.574205	1.48886	8.68058	2.75e-45	2.41e-44	-0.13069	0.913394	8.68058	0.000901206	0.00121961
ALAS2	-0.567143	0.674952	8.47841	2.19e-17	5.32e-17	0.574161	1.48881	8.47841	1.32e-11	3.14e-11	0.295403	1.22723	8.47841	0.000236112	0.000329544
HP	-1.3806	0.38406	8.23501	2.88e-75	5e-74	0.574018	1.48866	8.23501	7.44e-09	1.55e-08	1.45069	2.73339	8.23501	1.2e-57	7.04e-57
SNF8	-0.270206	0.829201	10.1796	3.36e-50	2.33e-49	0.573851	1.48849	10.1796	2.75e-158	2.79e-156	-0.125992	0.916374	10.1796	1.4e-08	2.35e-08
ATP5G1	-0.291429	0.817093	12.3586	3.93e-36	1.74e-35	0.573573	1.48821	12.3586	4.01e-91	1.24e-89	-0.0956087	0.935877	12.3586	0.000715833	0.000974094
DARS2	-0.0727211	0.950843	8.70782	0.00609184	0.00774384	0.57297	1.48758	8.70782	2.05e-71	3.94e-70	-0.405652	0.754895	8.70782	1.74e-39	6.82e-39
LIN9	-0.0820612	0.944707	8.97285	0.000201425	0.000281436	0.572617	1.48722	8.97285	1.86e-106	7.64e-105	-0.392075	0.762033	8.97285	1.97e-53	1.05e-52
HIST1H2BN	-0.280332	0.823401	7.35241	8.54e-37	3.87e-36	0.571939	1.48652	7.35241	9.56e-101	3.49e-99	-0.109914	0.926643	7.35241	4.43e-05	6.4e-05
DPY19L2P4	-0.0535139	0.963586	8.99889	0.130685	0.148288	0.571793	1.48637	8.99889	3.95e-39	2.75e-38	-0.431882	0.741294	8.99889	2.65e-25	7.4e-25
GSTZ1	-0.321293	0.800352	9.20475	5.55e-39	2.68e-38	0.571636	1.48621	9.20475	2.22e-79	5.18e-78	-0.0514775	0.964948	9.20475	0.0865029	0.101004
CANT1	-0.22171	0.857548	8.65222	4.54e-22	1.29e-21	0.571367	1.48593	8.65222	1.4e-94	4.6e-93	-0.192654	0.874995	8.65222	2.6e-12	4.97e-12
BAZ1A	-0.545394	0.685204	9.70178	3.33e-72	5.16e-71	0.571058	1.48561	9.70178	1.25e-48	1.22e-47	0.267274	1.20353	9.70178	1.17e-12	2.26e-12
SUPT4H1	-0.242186	0.845463	12.6634	7.75e-31	2.87e-30	0.570148	1.48468	12.6634	7.15e-114	3.37e-112	-0.162494	0.893479	12.6634	1.41e-10	2.54e-10
NGDN	-0.26737	0.830833	12.1934	4.57e-27	1.5e-26	0.569808	1.48433	12.1934	1.13e-78	2.6e-77	-0.126429	0.916096	12.1934	2.5e-05	3.66e-05
ARMC8	-0.216236	0.860808	9.73992	2.59e-23	7.65e-23	0.569122	1.48362	9.73992	9.65e-106	3.93e-104	-0.198433	0.871497	9.73992	2.63e-14	5.36e-14
F12	-0.283989	0.821317	11.44	3.78e-09	6.7e-09	0.56905	1.48355	11.44	4.86e-21	1.74e-20	-0.102155	0.93164	11.44	0.0765732	0.0898721
FLNC	-0.829401	0.562763	7.10613	5.22e-112	2.98e-110	0.567255	1.4817	7.10613	7.95e-31	4.13e-30	0.673961	1.59545	7.10613	4.26e-49	2.09e-48
NUDT5	-0.423732	0.745494	11.1419	5.11e-93	1.61e-91	0.566446	1.48087	11.1419	2.34e-105	9.44e-104	0.0986024	1.07074	11.1419	0.000162024	0.000228118
WDR72	-0.311913	0.805573	5.69405	7.92e-17	1.89e-16	0.565897	1.48031	5.69405	1.22e-33	7.06e-33	-0.0597007	0.959463	5.69405	0.18506	0.208667
C19orf52	-0.438873	0.737711	9.72644	7.58e-103	3.26e-101	0.565832	1.48024	9.72644	1.81e-107	7.64e-106	0.120649	1.08722	9.72644	3.07e-06	4.69e-06
VBP1	-0.0760662	0.948641	10.3749	0.0041675	0.00534812	0.56535	1.47975	10.3749	3.42e-69	6.13e-68	-0.394134	0.760946	10.3749	3.65e-37	1.36e-36
ZNF443	-0.0519435	0.964636	7.67718	0.0417983	0.0498507	0.56514	1.47953	7.67718	2.38e-75	5.03e-74	-0.428203	0.743187	7.67718	1.13e-47	5.36e-47
CCDC15	-0.0494802	0.966284	7.92401	0.0584027	0.0687409	0.565122	1.47951	7.92401	1.52e-71	2.93e-70	-0.431685	0.741395	7.92401	3.87e-46	1.77e-45
LIN54	-0.229675	0.852827	7.00385	3.12e-27	1.03e-26	0.564199	1.47857	7.00385	1.54e-108	6.65e-107	-0.174976	0.885782	7.00385	7.86e-12	1.48e-11
GABRB3	0.28863	1.22148	9.88578	3.43e-20	9.17e-20	0.564127	1.47849	9.88578	1.52e-47	1.43e-46	-0.910941	0.531838	9.88578	8.72e-156	3.62e-154
NOVA2	-0.275035	0.82643	8.76299	1.4e-20	3.79e-20	0.563295	1.47764	8.76299	1.88e-53	2.11e-52	-0.10976	0.926742	8.76299	0.00206908	0.00273243
SLC35B1	-0.14798	0.902513	11.6417	1.58e-09	2.84e-09	0.563005	1.47734	11.6417	1.09e-80	2.6e-79	-0.289929	0.817943	11.6417	1.29e-23	3.46e-23
SMC3	0.039683	1.02789	12.3729	0.172924	0.193674	0.561945	1.47626	12.3729	2.41e-56	2.98e-55	-0.555481	0.68043	12.3729	2.86e-62	1.85e-61
CCDC68	0.027283	1.01909	7.66321	0.676358	0.699175	0.561882	1.47619	7.66321	7.64e-12	1.84e-11	-0.537816	0.688813	7.66321	3.55e-12	6.75e-12
HIST1H2AK	-0.39095	0.762627	9.17673	7.87e-46	4.69e-45	0.560988	1.47528	9.17673	1.58e-59	2.17e-58	0.0568966	1.04023	9.17673	0.0916812	0.1069
MTCH2	-0.3036	0.810228	10.9719	1.25e-43	6.93e-43	0.560935	1.47523	10.9719	1.63e-97	5.68e-96	-0.0670995	0.954555	10.9719	0.0123713	0.0155302
SLC22A15	-0.756274	0.592023	8.21736	1.12e-33	4.6e-33	0.560881	1.47517	8.21736	2.64e-12	6.51e-12	0.575777	1.49048	8.21736	2.34e-14	4.77e-14
KIRREL2	-0.453946	0.730043	6.64012	3.43e-60	3.38e-59	0.560813	1.4751	6.64012	2.46e-57	3.13e-56	0.146512	1.10689	6.64012	1.9e-05	2.8e-05
CRTAC1	-0.67631	0.625764	8.12337	2.38e-32	9.38e-32	0.560109	1.47438	8.12337	1.78e-14	4.85e-14	0.462908	1.37832	8.12337	1.96e-11	3.63e-11
NDUFB11	-0.238105	0.847858	12.5085	2.56e-24	7.77e-24	0.560105	1.47438	12.5085	1.78e-86	4.91e-85	-0.159369	0.895417	12.5085	1.54e-08	2.59e-08
ADAM22	-0.0126939	0.99124	7.80937	0.655587	0.679705	0.55945	1.47371	7.80937	1.42e-58	1.89e-57	-0.478886	0.717531	7.80937	5.34e-48	2.55e-47
FBXL21	-0.388178	0.764094	6.15989	1.32e-31	5.05e-31	0.558743	1.47299	6.15989	6.33e-41	4.74e-40	0.0549547	1.03883	6.15989	0.172926	0.195643
MAZ	-0.208101	0.865676	8.65751	1.74e-19	4.54e-19	0.558101	1.47233	8.65751	2.6e-89	7.72e-88	-0.200198	0.870431	8.65751	3.92e-13	7.71e-13
SEMA3A	-0.167316	0.890498	8.68675	0.00152222	0.00201369	0.557218	1.47143	8.68675	3.63e-17	1.11e-16	-0.25733	0.836635	8.68675	4.2e-05	6.08e-05
RAB3IP	-0.14393	0.90505	8.41062	2.57e-05	3.78e-05	0.555865	1.47005	8.41062	1.84e-39	1.3e-38	-0.289337	0.818278	8.41062	9.76e-13	1.89e-12
PARP1	-0.189836	0.876706	13.1499	3.81e-19	9.82e-19	0.554473	1.46863	13.1499	8e-106	3.27e-104	-0.222913	0.856834	13.1499	1.27e-18	2.95e-18
POLR3D	-0.257533	0.836517	10.0066	4.39e-20	1.17e-19	0.554382	1.46854	10.0066	1.02e-57	1.32e-56	-0.126696	0.915927	10.0066	0.000176226	0.000247721
BZW2	-0.101425	0.932112	12.3811	0.000332281	0.000458137	0.554222	1.46838	12.3811	4.63e-58	6.08e-57	-0.348238	0.785543	12.3811	1e-25	2.83e-25
EIF2B2	-0.312181	0.805423	10.9234	3.77e-43	2.06e-42	0.554146	1.4683	10.9234	3.71e-88	1.07e-86	-0.0488829	0.966685	10.9234	0.0781143	0.0915788
FAM104A	-0.32631	0.797574	9.74019	2.17e-35	9.39e-35	0.554078	1.46823	9.74019	9.17e-65	1.47e-63	-0.0287585	0.980263	9.74019	0.369118	0.398685
PALB2	-0.115722	0.922921	8.44274	4.11e-07	6.62e-07	0.553648	1.46779	8.44274	4.86e-91	1.49e-89	-0.327426	0.796957	8.44274	1.89e-34	6.66e-34
MSH2	0.068304	1.04848	11.7129	0.00951006	0.0119332	0.553039	1.46717	11.7129	3.58e-67	6.13e-66	-0.588214	0.665166	11.7129	3.21e-87	3.32e-86
SRP68	-0.281834	0.822545	9.90391	1.03e-28	3.53e-28	0.552785	1.46692	9.90391	3.01e-70	5.59e-69	-0.0907691	0.939022	9.90391	0.00312163	0.00408332
CCNE2	0.105924	1.07618	7.19671	0.00242033	0.0031528	0.552373	1.4665	7.19671	1.86e-37	1.22e-36	-0.641047	0.641247	7.19671	2.61e-57	1.53e-56
NRGN	-0.550959	0.682566	7.87755	3.42e-63	3.77e-62	0.552243	1.46636	7.87755	3.5e-39	2.45e-38	0.291888	1.22424	7.87755	5.21e-13	1.02e-12
CBX5	-0.114247	0.923864	10.5809	1.03e-05	1.55e-05	0.551845	1.46596	10.5809	4.8e-69	8.58e-68	-0.32792	0.796684	10.5809	4.53e-27	1.32e-26
ALS2CR11	-0.0951194	0.936195	7.37754	0.0616095	0.0723022	0.550734	1.46483	7.37754	5.28e-18	1.67e-17	-0.354095	0.78236	7.37754	4.48e-09	7.66e-09
FKBP3	-0.15178	0.900139	12.6617	9.3e-12	1.83e-11	0.550359	1.46445	12.6617	1.51e-94	4.94e-93	-0.2733	0.827424	12.6617	2.68e-25	7.48e-25
APEX1	-0.182599	0.881114	10.9174	8e-13	1.64e-12	0.550258	1.46435	10.9174	3.04e-70	5.64e-69	-0.229445	0.852963	10.9174	4.1e-14	8.32e-14
ISCA2	-0.466687	0.723625	11.2265	2.21e-83	5.11e-82	0.550224	1.46431	11.2265	1.12e-71	2.17e-70	0.174009	1.12819	11.2265	8.09e-09	1.37e-08
PIWIL1	-0.18199	0.881486	5.76059	4.75e-07	7.63e-07	0.549688	1.46377	5.76059	1.72e-34	1.03e-33	-0.229804	0.852751	5.76059	9.34e-08	1.52e-07
HINT2	-0.496875	0.70864	10.3592	6.2e-90	1.72e-88	0.54958	1.46366	10.3592	2.52e-67	4.34e-66	0.217451	1.16268	10.3592	2.19e-12	4.19e-12
FDXR	-0.230535	0.852319	12.4103	8.73e-10	1.59e-09	0.549291	1.46337	12.4103	1e-31	5.41e-31	-0.160514	0.894706	12.4103	0.000357576	0.000494367
CCL18	-1.02811	0.490353	10.1127	3.42e-36	1.52e-35	0.548997	1.46307	10.1127	1.93e-07	3.69e-07	0.972354	1.96204	10.1127	4.85e-23	1.28e-22
PTRH2	-0.27224	0.828033	11.8149	1.06e-25	3.37e-25	0.548554	1.46262	11.8149	6.87e-66	1.14e-64	-0.100636	0.932622	11.8149	0.00135142	0.00180527
ZDHHC13	-0.069776	0.952786	9.73182	0.0108357	0.0135438	0.547865	1.46192	9.73182	1.16e-60	1.65e-59	-0.387536	0.764434	9.73182	8.47e-34	2.95e-33
PHACTR3	0.183395	1.13555	11.2612	2.91e-09	5.19e-09	0.547179	1.46123	11.2612	9.87e-47	9.03e-46	-0.746447	0.59607	11.2612	5.65e-103	7.96e-102
FBL	-0.348923	0.78517	14.0793	9.1e-55	7.5e-54	0.544373	1.45839	14.0793	1.07e-85	2.85e-84	0.0119735	1.00833	14.0793	0.664678	0.688206
PDS5A	-0.179758	0.882851	8.57875	3.76e-12	7.49e-12	0.543682	1.45769	8.57875	2.11e-66	3.52e-65	-0.227638	0.854032	8.57875	1.49e-13	2.96e-13
SH3RF1	-0.234026	0.850259	9.76394	1.18e-16	2.8e-16	0.543315	1.45732	9.76394	7.72e-55	9.07e-54	-0.150249	0.901095	9.76394	9.33e-06	1.39e-05
ZDHHC12	-0.465854	0.724042	8.81916	3.5e-66	4.35e-65	0.543295	1.4573	8.81916	7.63e-56	9.25e-55	0.178982	1.13208	8.81916	9.65e-08	1.57e-07
SQLE	-0.11472	0.923561	11.0349	0.000292583	0.000404511	0.542874	1.45687	11.0349	5.49e-44	4.6e-43	-0.319279	0.80147	11.0349	1.44e-17	3.24e-17
GPR19	0.0756166	1.05381	9.89926	0.0434653	0.0517536	0.542126	1.45612	9.89926	1.84e-31	9.82e-31	-0.588906	0.664847	9.89926	8.89e-42	3.72e-41
ZNF473	-0.0417656	0.971465	8.53557	0.0845648	0.0979024	0.541837	1.45582	8.53557	4.46e-77	9.86e-76	-0.421958	0.746411	8.53557	1.54e-51	7.91e-51
UMPS	-0.217768	0.859895	10.7503	1.59e-24	4.87e-24	0.541343	1.45533	10.7503	1.11e-98	3.94e-97	-0.171585	0.887867	10.7503	2.07e-11	3.85e-11
FAM110A	-0.200017	0.87054	12.0246	2.24e-13	4.69e-13	0.540599	1.45458	12.0246	1.2e-58	1.6e-57	-0.196131	0.872888	12.0246	1.75e-09	3.04e-09
TWIST1	-0.52086	0.696956	8.00947	3.29e-16	7.66e-16	0.540536	1.45451	8.00947	2.43e-11	5.72e-11	0.259544	1.1971	8.00947	0.000708899	0.000965453
HES6	-0.0811354	0.945313	8.97213	0.00994819	0.01246	0.540271	1.45425	8.97213	3.33e-44	2.82e-43	-0.36466	0.776652	8.97213	6.87e-23	1.8e-22
STRBP	-0.0186158	0.987179	9.64073	0.479701	0.50864	0.538947	1.45291	9.64073	9.98e-64	1.55e-62	-0.452265	0.730894	9.64073	4.89e-50	2.44e-49
AXIN2	-0.296273	0.814353	7.56735	5e-47	3.15e-46	0.537624	1.45158	7.56735	1.06e-101	4.01e-100	-0.0567987	0.961395	7.56735	0.0244089	0.0299183
ATP6V0A2	-0.483127	0.715425	9.46639	1.17e-91	3.48e-90	0.537421	1.45138	9.46639	2.1e-69	3.78e-68	0.208727	1.15567	9.46639	2.72e-12	5.19e-12
TTC9B	0.0917349	1.06565	11.6707	0.00317795	0.00411334	0.537322	1.45128	11.6707	8.83e-45	7.57e-44	-0.607528	0.65632	11.6707	2.42e-65	1.68e-64
SLC1A5	-0.725525	0.604777	7.58216	4.78e-139	8.02e-137	0.537181	1.45113	7.58216	1.77e-43	1.46e-42	0.553162	1.4673	7.58216	3.94e-52	2.05e-51
GART	-0.212429	0.863083	8.66781	3.7e-19	9.52e-19	0.535838	1.44978	8.66781	1.27e-76	2.77e-75	-0.174275	0.886213	8.66781	9.3e-10	1.63e-09
MTHFD2	-0.250049	0.840868	11.8373	3.26e-15	7.31e-15	0.534522	1.44846	11.8373	7.15e-42	5.56e-41	-0.119685	0.920389	11.8373	0.00168021	0.00223212
C14orf142	-0.186689	0.87862	8.9087	2.12e-12	4.26e-12	0.533812	1.44775	8.9087	2.04e-60	2.88e-59	-0.209029	0.865119	8.9087	4.21e-11	7.73e-11
TRIM28	-0.124313	0.917441	12.0967	5.24e-07	8.41e-07	0.533264	1.4472	12.0967	2.09e-70	3.92e-69	-0.297121	0.813875	12.0967	2.5e-24	6.82e-24
SART1	-0.404921	0.755278	10.9714	1.53e-77	2.87e-76	0.532823	1.44676	10.9714	1.45e-84	3.82e-83	0.101754	1.07308	10.9714	0.000178093	0.000250224
H1F0	0.0369029	1.02591	12.5103	0.363345	0.391536	0.532737	1.44667	12.5103	5.37e-26	2.35e-25	-0.52559	0.694675	12.5103	2.03e-28	6.16e-28
SLC25A19	-0.567441	0.674813	8.7506	8.25e-142	1.57e-139	0.53237	1.4463	8.7506	1.95e-72	3.86e-71	0.332945	1.25958	8.7506	2.93e-31	9.55e-31
MED12L	-0.211088	0.863885	5.95762	1.82e-14	3.98e-14	0.532213	1.44615	5.95762	1.66e-55	1.98e-54	-0.172961	0.88702	5.95762	1.56e-07	2.53e-07
DUS1L	-0.32958	0.795768	10.9809	1.03e-58	9.66e-58	0.531309	1.44524	10.9809	3.28e-99	1.18e-97	-0.00389168	0.997306	10.9809	0.877443	0.88748
CKB	-0.143096	0.905574	13.1259	2.25e-07	3.67e-07	0.530731	1.44466	13.1259	2.42e-55	2.87e-54	-0.268197	0.830357	13.1259	2.59e-16	5.62e-16
CMBL	-0.384805	0.765883	8.57851	5.09e-23	1.49e-22	0.530655	1.44458	8.57851	3.27e-27	1.5e-26	0.0751123	1.05344	8.57851	0.110415	0.127562
EZH2	0.0666808	1.0473	10.4764	0.0542092	0.0639741	0.529702	1.44363	10.4764	4.46e-35	2.71e-34	-0.565182	0.67587	10.4764	4.91e-45	2.2e-44
MYLK2	-0.291614	0.816987	7.65325	2.98e-25	9.34e-25	0.529395	1.44332	7.65325	5.68e-52	6.12e-51	-0.056105	0.961857	7.65325	0.0987264	0.114733
HIST1H3G	-0.208502	0.865435	9.40786	2.07e-17	5.03e-17	0.529379	1.44331	9.40786	1.26e-69	2.29e-68	-0.174116	0.88631	9.40786	3.26e-09	5.6e-09
DHX40	0.0225103	1.01573	9.24037	0.442866	0.471568	0.52918	1.44311	9.24037	5.08e-49	5e-48	-0.501992	0.706131	9.24037	1.1e-49	5.44e-49
NEDD1	-0.217634	0.859975	8.10224	4.71e-19	1.21e-18	0.529145	1.44307	8.10224	2.33e-70	4.35e-69	-0.16094	0.894442	8.10224	3.9e-08	6.45e-08
HSPA2	-0.577464	0.670141	9.72113	2.38e-39	1.16e-38	0.528325	1.44225	9.72113	6.45e-21	2.3e-20	0.350771	1.27524	9.72113	5.12e-11	9.39e-11
SLC39A9	-0.194297	0.873999	8.12383	1.53e-14	3.36e-14	0.527941	1.44187	8.12383	2.46e-65	4e-64	-0.193011	0.874778	8.12383	1.67e-10	3e-10
PAFAH1B3	0.176104	1.12983	12.3055	2.23e-08	3.82e-08	0.527344	1.44127	12.3055	9.32e-42	7.22e-41	-0.718476	0.607739	12.3055	9.35e-91	1.03e-89
RBM4	-0.180446	0.88243	11.7313	2.64e-14	5.72e-14	0.527068	1.441	11.7313	8.62e-75	1.81e-73	-0.211905	0.863396	11.7313	6.26e-14	1.27e-13
RDH12	-0.530494	0.692318	7.08379	1.38e-43	7.64e-43	0.526229	1.44016	7.08379	6.39e-27	2.89e-26	0.285932	1.2192	7.08379	9.07e-10	1.59e-09
CCDC11	-0.355901	0.781382	6.72377	1.38e-27	4.62e-27	0.525567	1.4395	6.72377	1.79e-37	1.18e-36	0.0385866	1.02711	6.72377	0.330263	0.359225
CDC42EP3	-0.190179	0.876497	9.57821	3.52e-13	7.32e-13	0.524944	1.43888	9.57821	3.04e-60	4.26e-59	-0.196197	0.872848	9.57821	3.3e-10	5.88e-10
C14orf169	-0.410237	0.7525	10.1021	5.98e-78	1.13e-76	0.524829	1.43876	10.1021	5.94e-80	1.4e-78	0.116403	1.08403	10.1021	2.19e-05	3.21e-05
TAF5	-0.0835924	0.943705	7.36333	0.000339226	0.000467546	0.524548	1.43848	7.36333	1.18e-77	2.66e-76	-0.347205	0.786106	7.36333	2.65e-37	9.94e-37
NUP98	-0.492129	0.710975	9.76062	2.56e-120	2.05e-118	0.524405	1.43834	9.76062	5.32e-82	1.32e-80	0.233071	1.17533	9.76062	4.04e-18	9.29e-18
DPP3	-0.417802	0.748564	10.5646	8.07e-56	6.92e-55	0.524199	1.43814	10.5646	6.33e-55	7.45e-54	0.127705	1.09255	10.5646	9.42e-05	0.000134027
CMTM8	-0.873538	0.545807	8.36865	3.21e-120	2.54e-118	0.523778	1.43772	8.36865	2.5e-25	1.06e-24	0.775255	1.71149	8.36865	6.96e-63	4.58e-62
SAMD1	-0.0510055	0.965263	9.71086	0.0446695	0.0531437	0.523565	1.4375	9.71086	1.25e-64	1.98e-63	-0.392607	0.761752	9.71086	2.46e-40	9.87e-40
SNAPC1	-0.375249	0.770972	8.95344	1.07e-44	6.13e-44	0.523532	1.43747	8.95344	1.02e-54	1.19e-53	0.0678693	1.04817	8.95344	0.0383692	0.0462418
RTN4R	-0.0714143	0.951705	10.0889	0.0474002	0.0562595	0.522626	1.43657	10.0889	1.32e-31	7.08e-31	-0.362792	0.777658	10.0889	1.37e-17	3.1e-17
CTCFL	-0.27071	0.828911	5.46146	2.14e-17	5.2e-17	0.522548	1.43649	5.46146	1.87e-39	1.32e-38	-0.0797081	0.946249	5.46146	0.0378593	0.0456892
MRPL10	-0.233282	0.850698	11.4946	4.3e-24	1.3e-23	0.522227	1.43617	11.4946	8.05e-77	1.77e-75	-0.132575	0.912202	11.4946	1.81e-06	2.79e-06
TMEM132D	-0.146389	0.903509	6.7661	0.00301742	0.00391167	0.521456	1.4354	6.7661	3.43e-17	1.05e-16	-0.255283	0.837823	6.7661	1.38e-05	2.05e-05
C20orf96	-0.240056	0.846712	8.44013	1.56e-10	2.93e-10	0.521135	1.43508	8.44013	1.03e-28	4.98e-28	-0.121984	0.918923	8.44013	0.00661757	0.00847913
RASL11B	-0.0718873	0.951393	9.14159	0.0532738	0.062915	0.520676	1.43463	9.14159	1.86e-29	9.26e-29	-0.360388	0.778955	9.14159	2.28e-16	4.96e-16
PHB	-0.252029	0.839715	11.6995	1.33e-29	4.73e-29	0.520228	1.43418	11.6995	4.28e-81	1.03e-79	-0.104177	0.930336	11.6995	0.000115216	0.000163327
GNPNAT1	-0.316127	0.803223	7.92849	2.32e-42	1.24e-41	0.519979	1.43393	7.92849	3.04e-73	6.14e-72	-0.0129311	0.991077	7.92849	0.648491	0.672649
PPP1R14A	-0.720933	0.606705	8.78574	2.17e-52	1.63e-51	0.519775	1.43373	8.78574	2.09e-17	6.47e-17	0.562102	1.47642	8.78574	1.46e-22	3.79e-22
HBD	-0.534107	0.690586	9.21032	3.64e-13	7.57e-13	0.519237	1.4332	9.21032	2.54e-08	5.11e-08	0.297273	1.22882	9.21032	0.000739413	0.00100536
NIP7	-0.396625	0.759633	10.1807	5.75e-51	4.1e-50	0.519131	1.43309	10.1807	9.66e-55	1.13e-53	0.102135	1.07336	10.1807	0.00165459	0.00219935
CAMKV	0.223534	1.16759	10.0273	6.1e-06	9.3e-06	0.518707	1.43267	10.0273	6.28e-17	1.91e-16	-0.778157	0.583111	10.0273	1.11e-41	4.62e-41
CSE1L	-0.0288809	0.98018	11.2596	0.219109	0.242355	0.51806	1.43203	11.2596	1.16e-74	2.41e-73	-0.419136	0.747872	11.2596	4.26e-54	2.32e-53
WDR53	-0.34172	0.7891	9.15944	5.49e-86	1.36e-84	0.517877	1.43185	9.15944	1.5e-129	9.19e-128	0.0252782	1.01768	9.15944	0.248141	0.275124
MPP6	0.0150434	1.01048	9.70423	0.768066	0.786536	0.517507	1.43148	9.70423	5.51e-16	1.6e-15	-0.481021	0.71647	9.70423	1.39e-15	2.94e-15
ZNF530	-0.194642	0.87379	7.00338	1.67e-24	5.1e-24	0.516952	1.43093	7.00338	1.62e-114	7.69e-113	-0.182761	0.881016	7.00338	1.21e-15	2.56e-15
NONO	-0.245769	0.843366	11.5785	1.26e-34	5.3e-34	0.516936	1.43091	11.5785	9.52e-101	3.49e-99	-0.110142	0.926497	11.5785	5.89e-06	8.87e-06
KLHL25	-0.271431	0.828497	10.9601	2.88e-25	9.04e-25	0.515023	1.42902	10.9601	5.31e-57	6.69e-56	-0.0720017	0.951317	10.9601	0.0227324	0.0279255
PPP4C	-0.240179	0.84664	11.0805	1.42e-26	4.62e-26	0.515007	1.429	11.0805	4.15e-78	9.4e-77	-0.116368	0.922507	11.0805	1.88e-05	2.77e-05
INTS2	-0.0462803	0.96843	8.44393	0.10473	0.120048	0.514885	1.42888	8.44393	4.8e-49	4.73e-48	-0.391608	0.762279	8.44393	7.31e-32	2.43e-31
C20orf24	-0.370648	0.773435	12.5959	1.96e-83	4.55e-82	0.514726	1.42872	12.5959	1.07e-102	4.09e-101	0.0691572	1.0491	12.5959	0.00402728	0.00523252
PRDX4	-0.478841	0.717554	12.6118	3.44e-92	1.04e-90	0.514686	1.42868	12.6118	6.97e-65	1.12e-63	0.222835	1.16702	12.6118	4.04e-14	8.2e-14
TNNT1	-0.397333	0.759261	6.61647	5.96e-12	1.18e-11	0.514084	1.42809	6.61647	1.88e-12	4.68e-12	0.107623	1.07745	6.61647	0.120212	0.138288
TOX	0.084171	1.06008	9.95138	0.0739347	0.0861815	0.513528	1.42754	9.95138	2.94e-18	9.4e-18	-0.575653	0.670983	9.95138	2.16e-25	6.04e-25
PSMC5	-0.234683	0.849872	12.1873	8.04e-22	2.26e-21	0.513202	1.42721	12.1873	2.08e-65	3.38e-64	-0.122569	0.91855	12.1873	3.15e-05	4.59e-05
IQCD	-0.3786	0.769183	8.10957	1.27e-28	4.35e-28	0.513151	1.42716	8.10957	8.25e-33	4.62e-32	0.0818495	1.05837	8.10957	0.047782	0.0571166
RNASEH2C	-0.687973	0.620725	11.6304	2.24e-156	6.83e-154	0.513061	1.42707	11.6304	9.79e-49	9.54e-48	0.521259	1.43521	11.6304	6.19e-57	3.59e-56
ARMC7	-0.377941	0.769535	9.7552	2.9e-78	5.57e-77	0.512804	1.42682	9.7552	2.55e-91	7.89e-90	0.0812217	1.05791	9.7552	0.00129308	0.00172953
NRTN	-0.434636	0.739881	6.21925	6.93e-30	2.48e-29	0.512568	1.42659	6.21925	4.33e-26	1.9e-25	0.161941	1.11879	6.21925	0.000480377	0.000659657
SHKBP1	-0.490143	0.711954	8.53985	1.16e-90	3.35e-89	0.512364	1.42639	8.53985	3.22e-60	4.5e-59	0.240947	1.18177	8.53985	2.16e-15	4.55e-15
CRYM	-0.566949	0.675043	8.20598	8.7e-41	4.44e-40	0.512248	1.42627	8.20598	3.97e-21	1.43e-20	0.35012	1.27467	8.20598	1.05e-11	1.96e-11
CLPB	-0.246044	0.843205	9.28741	1.09e-16	2.58e-16	0.511692	1.42572	9.28741	7.52e-44	6.28e-43	-0.105094	0.929744	9.28741	0.00320295	0.00418591
XK	0.232598	1.17495	10.0785	1.87e-07	3.06e-07	0.511139	1.42518	10.0785	6.72e-20	2.3e-19	-0.784308	0.58063	10.0785	4.44e-52	2.3e-51
CEBPG	-0.533987	0.690644	10.472	6.6e-133	8.14e-131	0.510767	1.42481	10.472	3.28e-71	6.29e-70	0.304626	1.2351	10.472	4.83e-28	1.45e-27
SNRPD2	-0.336561	0.791927	10.8865	6.33e-62	6.65e-61	0.510427	1.42447	10.8865	1.23e-91	3.86e-90	0.0245705	1.01718	10.8865	0.32804	0.35698
CTDSPL2	-0.104314	0.930247	9.71786	1.67e-06	2.62e-06	0.509894	1.42395	9.71786	1.68e-84	4.4e-83	-0.304764	0.809575	9.71786	6.78e-33	2.3e-32
STAG1	-0.0884435	0.940537	8.91096	0.000155496	0.000219033	0.509456	1.42351	8.91096	1.64e-72	3.28e-71	-0.326911	0.797242	8.91096	6.45e-33	2.19e-32
MMP1	-0.373246	0.772044	7.49996	3.07e-13	6.39e-13	0.509401	1.42346	7.49996	3.28e-15	9.23e-15	0.0775757	1.05524	7.49996	0.206852	0.23183
CBLN1	-0.281459	0.822759	7.4003	1.18e-09	2.14e-09	0.509262	1.42332	7.4003	2.07e-18	6.65e-18	-0.0526442	0.964168	7.4003	0.342243	0.371458
ZMYND19	-0.114204	0.923892	9.49808	1.16e-06	1.83e-06	0.509208	1.42327	9.49808	1.46e-71	2.83e-70	-0.290109	0.81784	9.49808	9e-26	2.54e-25
MED19	-0.284826	0.820841	11.7931	8.37e-34	3.46e-33	0.509177	1.42324	11.7931	8.67e-69	1.54e-67	-0.0477879	0.967419	11.7931	0.0946685	0.110228
AMOT	-0.188451	0.877547	7.65402	4.79e-10	8.82e-10	0.508592	1.42266	7.65402	6.16e-42	4.8e-41	-0.184126	0.880182	7.65402	3.48e-07	5.55e-07
GTPBP3	-0.363586	0.77723	9.63063	2.49e-56	2.16e-55	0.508273	1.42235	9.63063	1.33e-69	2.42e-68	0.0648611	1.04598	9.63063	0.0222685	0.0273759
PGAM5	-0.291963	0.81679	7.21723	8.8e-40	4.34e-39	0.508178	1.42225	7.21723	2.27e-77	5.06e-76	-0.0367651	0.974838	7.21723	0.173618	0.196369
POLR2J	-0.19397	0.874197	11.8971	7.28e-17	1.74e-16	0.508012	1.42209	11.8971	1.01e-71	1.97e-70	-0.175774	0.885292	11.8971	2.67e-10	4.78e-10
NPPC	-0.599897	0.659801	6.47447	3.21e-71	4.75e-70	0.507694	1.42178	6.47447	2.67e-31	1.42e-30	0.400953	1.32038	6.47447	3.19e-22	8.23e-22
HSPA14	-0.320823	0.800613	10.7058	1.81e-53	1.42e-52	0.507565	1.42165	10.7058	3.8e-86	1.04e-84	0.00476281	1.00331	10.7058	0.852945	0.865119
SCML1	-0.484226	0.714881	8.25784	2.38e-69	3.28e-68	0.507253	1.42134	8.25784	7.87e-47	7.22e-46	0.237083	1.17861	8.25784	3.22e-12	6.13e-12
PASK	-0.271774	0.8283	9.11559	1.01e-24	3.1e-24	0.507144	1.42123	9.11559	8.75e-54	9.89e-53	-0.064516	0.956266	9.11559	0.043866	0.0526146
POLE3	-0.264278	0.832615	10.2828	6.09e-39	2.94e-38	0.506719	1.42082	10.2828	1.99e-93	6.38e-92	-0.0747832	0.949485	10.2828	0.00245713	0.00323234
SDF2L1	-0.640392	0.641538	12.6499	1.13e-112	6.65e-111	0.505845	1.41995	12.6499	2.74e-41	2.08e-40	0.460101	1.37564	12.6499	1.92e-38	7.42e-38
DBNDD1	-0.00778182	0.994621	8.51472	0.81181	0.827674	0.505643	1.41976	8.51472	6.26e-36	3.91e-35	-0.438069	0.738122	8.51472	2.03e-30	6.47e-30
PPM1G	-0.0922918	0.938031	12.1019	2.76e-05	4.06e-05	0.505275	1.41939	12.1019	4.65e-81	1.12e-79	-0.317733	0.80233	12.1019	4.96e-35	1.77e-34
DRD5	-0.2978	0.813492	6.60011	3.08e-13	6.41e-13	0.505147	1.41927	6.60011	7.38e-23	2.85e-22	-0.0257835	0.982287	6.60011	0.599099	0.625731
KCNA4	-0.393997	0.761018	6.3662	4.59e-12	9.12e-12	0.505124	1.41925	6.3662	2.29e-12	5.68e-12	0.110843	1.07986	6.3662	0.104688	0.121248
GJC1	-0.129996	0.913834	8.60574	2.07e-05	3.07e-05	0.50448	1.41861	8.60574	9.12e-41	6.8e-40	-0.263484	0.833074	8.60574	3.42e-13	6.74e-13
FAF1	-0.153476	0.899081	11.3137	2.83e-11	5.46e-11	0.504425	1.41856	11.3137	1.83e-72	3.65e-71	-0.230092	0.852581	11.3137	4.28e-17	9.51e-17
DCXR	-0.42244	0.746162	11.1267	1.38e-45	8.13e-45	0.50436	1.41849	11.1267	1.4e-40	1.04e-39	0.151913	1.11104	11.1267	3.11e-05	4.52e-05
NEUROD1	-0.290882	0.817402	5.48568	1.37e-12	2.78e-12	0.504258	1.41839	5.48568	1.37e-22	5.25e-22	-0.0348175	0.976155	5.48568	0.479708	0.509168
RMI1	0.120621	1.0872	10.9658	0.000235262	0.000327387	0.504235	1.41837	10.9658	2.39e-35	1.46e-34	-0.61916	0.65105	10.9658	1.07e-60	6.72e-60
CCDC137	-0.316982	0.802747	11.007	1.94e-35	8.4e-35	0.503941	1.41808	11.007	1.74e-56	2.17e-55	0.00252817	1.00175	11.007	0.935184	0.941851
CEP76	-0.00662934	0.995415	8.74385	0.777857	0.795718	0.503862	1.418	8.74385	2.16e-70	4.03e-69	-0.438124	0.738094	8.74385	2.27e-59	1.38e-58
NTHL1	-0.255389	0.837761	10.6272	1.7e-24	5.19e-24	0.503465	1.41761	10.6272	1.05e-59	1.45e-58	-0.0845154	0.943101	10.6272	0.00514904	0.00664453
PRR11	-0.103833	0.930558	10.1472	0.000895086	0.00120123	0.503091	1.41725	10.1472	9.23e-39	6.36e-38	-0.299405	0.812588	10.1472	5.44e-16	1.17e-15
THAP11	-0.336792	0.7918	9.66426	4.58e-58	4.22e-57	0.502442	1.41661	9.66426	1.26e-82	3.16e-81	0.0319905	1.02242	9.66426	0.217121	0.242541
POLR2D	-0.141131	0.906808	8.87055	1.49e-13	3.14e-13	0.502019	1.41619	8.87055	3.29e-108	1.41e-106	-0.245486	0.843531	8.87055	1.38e-27	4.08e-27
PLXNA2	-0.134304	0.911109	9.37162	0.00149196	0.00197433	0.501022	1.41522	9.37162	2.56e-21	9.28e-21	-0.254296	0.838396	9.37162	4.23e-07	6.72e-07
NRAS	-0.130891	0.913267	9.4788	1.79e-06	2.8e-06	0.500898	1.41509	9.4788	5e-50	5.1e-49	-0.259031	0.835649	9.4788	1.48e-15	3.13e-15
MAP2K2	-0.404658	0.755415	10.3139	3.03e-54	2.43e-53	0.500806	1.415	10.3139	6.89e-52	7.39e-51	0.129818	1.09416	10.3139	5.27e-05	7.59e-05
NDE1	-0.67937	0.624438	9.15792	1.97e-164	7.87e-162	0.500667	1.41487	9.15792	1.33e-49	1.34e-48	0.52005	1.43401	9.15792	1.03e-60	6.48e-60
GEMIN7	-0.262105	0.83387	9.64698	6.12e-31	2.28e-30	0.500142	1.41435	9.64698	7.47e-72	1.46e-70	-0.072027	0.9513	9.64698	0.00882189	0.011197
PAQR4	-0.0733092	0.950455	8.70839	0.00230932	0.00301294	0.500132	1.41434	8.70839	1.01e-65	1.65e-64	-0.340121	0.789975	8.70839	1.04e-33	3.63e-33
PDK1	-0.270139	0.829239	8.6784	7.16e-22	2.01e-21	0.49924	1.41347	8.6784	3.21e-46	2.88e-45	-0.0598163	0.959386	8.6784	0.0778852	0.0913275
C19orf53	-0.481873	0.716047	10.3877	1.68e-110	9.28e-109	0.499146	1.41338	10.3877	3.3e-71	6.31e-70	0.240943	1.18176	10.3877	1.03e-18	2.41e-18
YIF1A	-0.382596	0.767056	12.9516	3.09e-66	3.84e-65	0.498801	1.41304	12.9516	1.07e-70	2.03e-69	0.100269	1.07197	12.9516	0.000282058	0.000392206
BAD	-0.305957	0.808906	11.8692	1.12e-40	5.71e-40	0.498176	1.41243	11.8692	1.16e-68	2.04e-67	-0.00800861	0.994464	11.8692	0.774949	0.791694
NDNL2	-0.394913	0.760535	8.91535	8.63e-68	1.12e-66	0.497327	1.4116	8.91535	3.29e-67	5.64e-66	0.119069	1.08603	8.91535	2.38e-05	3.48e-05
PSMC4	-0.288265	0.818886	11.2684	9.17e-36	4.01e-35	0.496939	1.41122	11.2684	1.25e-67	2.17e-66	-0.0320333	0.978041	11.2684	0.254909	0.282115
CTXN1	-0.121939	0.918952	9.37369	7.72e-06	1.17e-05	0.496546	1.41083	9.37369	1.04e-49	1.05e-48	-0.267878	0.83054	9.37369	1.01e-16	2.21e-16
SF3B2	-0.268336	0.830277	13.049	4.67e-39	2.26e-38	0.496543	1.41083	13.049	1.15e-86	3.2e-85	-0.0599823	0.959276	13.049	0.016631	0.0206381
RGS4	0.132742	1.09638	11.392	0.0108002	0.0135022	0.496344	1.41063	11.392	3.1e-14	8.35e-14	-0.629363	0.646462	11.392	7.9e-25	2.18e-24
C14orf93	-0.18912	0.877141	10.4678	1.51e-19	3.94e-19	0.496251	1.41054	10.4678	1.88e-85	4.99e-84	-0.172215	0.887479	10.4678	6.12e-12	1.16e-11
TUT1	-0.343447	0.788156	10.2624	1.5e-57	1.36e-56	0.496019	1.41032	10.2624	2.65e-76	5.73e-75	0.0471465	1.03322	10.2624	0.075646	0.0888109
RPP40	-0.331033	0.794967	9.41453	1.32e-36	5.93e-36	0.495938	1.41024	9.41453	1.18e-51	1.26e-50	0.0295886	1.02072	9.41453	0.354206	0.383472
ELK1	-0.386427	0.765022	7.41907	4.35e-58	4.01e-57	0.495274	1.40959	7.41907	9.3e-60	1.28e-58	0.108842	1.07836	7.41907	0.000245543	0.000342336
NUDT4	-0.695285	0.617587	8.73737	1.34e-135	1.82e-133	0.495089	1.40941	8.73737	2.48e-39	1.75e-38	0.547606	1.46166	8.73737	1.5e-54	8.23e-54
NRM	0.0103045	1.00717	10.231	0.713969	0.735037	0.494581	1.40891	10.231	1.43e-46	1.3e-45	-0.453928	0.730053	10.231	4e-44	1.76e-43
STOML2	-0.301911	0.811177	10.7144	2.64e-34	1.1e-33	0.494475	1.40881	10.7144	4.34e-58	5.7e-57	-0.0104669	0.992771	10.7144	0.728006	0.748425
CHRNA5	-0.0146325	0.989909	8.47428	0.649348	0.673779	0.494215	1.40855	8.47428	2.11e-35	1.3e-34	-0.41819	0.748363	8.47428	1.26e-28	3.83e-28
DYRK3	-0.717017	0.608354	7.51927	6.45e-98	2.29e-96	0.49402	1.40836	7.51927	7.8e-28	3.66e-27	0.579416	1.49424	7.51927	5.45e-43	2.34e-42
ZNF680	-0.0781079	0.947299	7.41249	0.0018344	0.00241179	0.493708	1.40806	7.41249	1.22e-58	1.62e-57	-0.327601	0.79686	7.41249	7.21e-29	2.21e-28
C14orf2	-0.272965	0.827617	11.436	1.12e-35	4.86e-35	0.493422	1.40778	11.436	1.17e-74	2.43e-73	-0.0506365	0.96551	11.436	0.0575765	0.0683307
MRPL52	-0.354166	0.782322	10.0374	9.97e-55	8.21e-54	0.49333	1.40769	10.0374	4.63e-67	7.88e-66	0.0647562	1.04591	10.0374	0.0208597	0.0256931
CLUL1	-0.306753	0.808459	5.95006	7.19e-10	1.31e-09	0.493284	1.40765	5.95006	3.74e-15	1.05e-14	-0.00253307	0.998246	5.95006	0.966127	0.970272
RPA2	-0.257004	0.836824	11.5944	5.69e-32	2.2e-31	0.492915	1.40729	11.5944	2.74e-75	5.78e-74	-0.0728528	0.950756	11.5944	0.00601239	0.00773022
DLG3	-0.0729657	0.950682	9.62288	0.00171638	0.00226201	0.491904	1.4063	9.62288	4.51e-68	7.91e-67	-0.333301	0.793718	9.62288	1.4e-34	4.98e-34
ERH	-0.231594	0.851693	12.2369	1.4e-24	4.29e-24	0.491636	1.40604	12.2369	4.3e-70	7.93e-69	-0.1078	0.928002	12.2369	7.93e-05	0.000113238
SEPHS2	-0.456735	0.728633	11.2971	2.5e-73	4.04e-72	0.491439	1.40585	11.2971	3.32e-52	3.61e-51	0.212091	1.15837	11.2971	1.2e-11	2.24e-11
GYG2	-0.0858395	0.942236	7.53155	0.00329483	0.00425701	0.491185	1.4056	7.53155	2.22e-42	1.76e-41	-0.314381	0.804196	7.53155	6.83e-20	1.65e-19
DAZAP1	-0.391442	0.762367	11.1951	1.04e-81	2.23e-80	0.491012	1.40543	11.1951	2.66e-80	6.31e-79	0.11975	1.08655	11.1951	2.87e-06	4.39e-06
LSM7	-0.230308	0.852453	13.6369	1.36e-29	4.82e-29	0.490202	1.40464	13.6369	1.09e-86	3.04e-85	-0.108352	0.927647	13.6369	1.13e-05	1.68e-05
ARG2	-0.0010454	0.999276	10.3025	0.972809	0.974913	0.489324	1.40379	10.3025	3.26e-38	2.2e-37	-0.433141	0.740647	10.3025	1e-33	3.48e-33
NUP155	-0.0854187	0.942511	9.26272	5.03e-05	7.29e-05	0.489257	1.40372	9.26272	3.42e-83	8.71e-82	-0.313266	0.804818	9.26272	3.44e-37	1.29e-36
BCORL1	-0.191659	0.875598	9.7965	1.71e-13	3.6e-13	0.489221	1.40369	9.7965	1.37e-52	1.5e-51	-0.162365	0.893559	9.7965	1.8e-07	2.91e-07
SUPT16H	-0.118153	0.921366	10.672	3.86e-07	6.23e-07	0.489066	1.40354	10.672	7.07e-67	1.2e-65	-0.266611	0.83127	10.672	2.81e-22	7.26e-22
LBR	-0.184312	0.880069	10.1362	3.36e-16	7.83e-16	0.488117	1.40261	10.1362	4.09e-70	7.56e-69	-0.171818	0.887723	10.1362	2.03e-10	3.65e-10
FSIP1	-0.325391	0.798082	6.01312	3.38e-40	1.69e-39	0.488063	1.40256	6.01312	4.82e-57	6.1e-56	0.0285717	1.02	6.01312	0.340291	0.369478
ARHGAP19	-0.388195	0.764085	8.13823	5.12e-79	1e-77	0.488034	1.40253	8.13823	4.88e-78	1.1e-76	0.117784	1.08507	8.13823	4.88e-06	7.39e-06
ELOF1	-0.316689	0.802911	10.0836	9.59e-41	4.89e-40	0.48777	1.40228	10.0836	3.76e-61	5.43e-60	0.0164742	1.01148	10.0836	0.569567	0.597256
PXMP2	-0.0379932	0.974009	9.66346	0.181846	0.203077	0.487183	1.40171	9.66346	4.92e-44	4.13e-43	-0.378771	0.769092	9.66346	5.43e-30	1.71e-29
ABHD5	-0.406646	0.754375	8.88315	1.84e-55	1.56e-54	0.487159	1.40168	8.88315	1.33e-49	1.34e-48	0.144762	1.10555	8.88315	5.69e-06	8.58e-06
DCTN5	-0.203514	0.868433	9.46802	1.54e-17	3.77e-17	0.487129	1.40165	9.46802	5.86e-62	8.57e-61	-0.143672	0.905212	9.46802	5.3e-07	8.37e-07
MYH6	-0.413292	0.750908	6.39892	1.36e-24	4.18e-24	0.486952	1.40148	6.39892	1.75e-21	6.39e-21	0.154384	1.11295	6.39892	0.00154908	0.00206407
MRPL38	-0.210869	0.864017	11.297	6.85e-24	2.05e-23	0.486941	1.40147	11.297	2.17e-81	5.28e-80	-0.13306	0.911895	11.297	1.29e-07	2.09e-07
PLA2G2A	-0.869491	0.54734	6.9463	2.13e-63	2.38e-62	0.48656	1.4011	6.9463	6.14e-13	1.56e-12	0.802566	1.7442	6.9463	1.6e-37	6e-37
EIF4A3	-0.0725862	0.950932	14.2379	0.00215394	0.00281687	0.486421	1.40097	14.2379	3.35e-64	5.26e-63	-0.32897	0.796105	14.2379	1.29e-32	4.35e-32
RBBP4	-0.198247	0.871609	9.04104	4.41e-17	1.06e-16	0.485862	1.40042	9.04104	3.31e-63	5.04e-62	-0.150025	0.901235	9.04104	1.14e-07	1.85e-07
MATN4	-0.469923	0.722003	7.5007	6.07e-66	7.46e-65	0.485811	1.40037	7.5007	1.93e-43	1.59e-42	0.235817	1.17757	7.5007	3.07e-12	5.85e-12
RSPO1	-0.314282	0.804251	6.41078	2.52e-14	5.46e-14	0.485378	1.39995	6.41078	8.95e-21	3.18e-20	0.015182	1.01058	6.41078	0.759326	0.777243
BDNF	-0.367562	0.775091	6.15068	1.25e-28	4.29e-28	0.485298	1.39988	6.15068	3.66e-31	1.93e-30	0.0909129	1.06504	6.15068	0.0235029	0.0288383
NPTX1	-0.604862	0.657534	7.16468	4.1e-24	1.24e-23	0.485206	1.39979	7.16468	1.9e-10	4.3e-10	0.427977	1.34535	7.16468	2.57e-09	4.43e-09
RAB33A	-0.0546218	0.962847	11.5044	0.0542894	0.0640621	0.484559	1.39916	11.5044	9.16e-44	7.6e-43	-0.352826	0.783049	11.5044	3.08e-26	8.8e-26
YEATS4	0.00973963	1.00677	10.7034	0.711594	0.732918	0.484497	1.3991	10.7034	5.13e-51	5.37e-50	-0.444169	0.735008	10.7034	3.35e-48	1.61e-47
IQGAP3	-0.282804	0.821992	8.06145	2.21e-29	7.8e-29	0.483503	1.39813	8.06145	6.19e-54	7.06e-53	-0.0278546	0.980878	8.06145	0.360995	0.390457
CTAG2	-0.514276	0.700144	7.15452	7e-08	1.17e-07	0.483104	1.39775	7.15452	6.4e-05	0.000104619	0.301207	1.23217	7.15452	0.00825861	0.0105074
DPF3	-0.0583798	0.960342	8.1406	0.0666637	0.078028	0.483056	1.3977	8.1406	1.53e-34	9.13e-34	-0.346155	0.786678	8.1406	2.61e-20	6.38e-20
ZNF567	-0.0884375	0.940541	9.35845	0.000122272	0.000173414	0.482833	1.39749	9.35845	7.5e-67	1.27e-65	-0.303273	0.810412	9.35845	2.78e-29	8.61e-29
DNAJB5	-0.157004	0.896886	12.6992	8.21e-08	1.37e-07	0.48283	1.39748	12.6992	1.68e-40	1.23e-39	-0.205902	0.866997	12.6992	3.49e-09	5.98e-09
CDH2	0.062712	1.04443	11.4234	0.050726	0.0600346	0.482818	1.39747	11.4234	6.09e-34	3.57e-33	-0.517902	0.698387	11.4234	5.14e-44	2.25e-43
DNMT3B	0.0801514	1.05713	9.87557	0.0252313	0.03067	0.482465	1.39713	9.87557	2.56e-27	1.18e-26	-0.542354	0.68665	9.87557	1.05e-38	4.08e-38
C14orf166	-0.345776	0.786885	13.4524	2.71e-68	3.6e-67	0.482168	1.39684	13.4524	2.41e-84	6.27e-83	0.0627552	1.04446	13.4524	0.010814	0.0136432
FAM9A	-0.207228	0.8662	5.63908	7.77e-06	1.18e-05	0.481742	1.39643	5.63908	1.24e-16	3.73e-16	-0.133613	0.911546	5.63908	0.0157572	0.0195937
CDC42EP4	-0.0828706	0.944177	11.5269	0.00658317	0.0083519	0.481627	1.39632	11.5269	2.34e-37	1.53e-36	-0.310107	0.806582	11.5269	6.95e-18	1.58e-17
SLBP	-0.205068	0.867498	11.965	6.8e-19	1.74e-18	0.481601	1.39629	11.965	9.67e-65	1.54e-63	-0.136556	0.909688	11.965	8.56e-07	1.34e-06
CCDC124	-0.245262	0.843662	10.7838	5.71e-35	2.44e-34	0.481577	1.39627	10.7838	1.96e-87	5.52e-86	-0.0794554	0.946415	10.7838	0.00101486	0.00136814
RGS13	-0.612142	0.654225	5.90044	7.19e-27	2.36e-26	0.481353	1.39605	5.90044	3.96e-11	9.23e-11	0.441737	1.35824	5.90044	1.27e-10	2.3e-10
EXOSC5	-0.155185	0.898017	9.06217	9.86e-08	1.63e-07	0.481168	1.39587	9.06217	1.14e-40	8.45e-40	-0.207009	0.866332	9.06217	2.34e-09	4.05e-09
ZNF334	0.0915869	1.06554	9.31119	0.00351197	0.00452946	0.481042	1.39575	9.31119	3.34e-35	2.04e-34	-0.557328	0.679559	9.31119	1.56e-53	8.35e-53
HCCS	-0.480092	0.716932	8.32878	8.93e-113	5.31e-111	0.480921	1.39563	8.32878	1.42e-67	2.47e-66	0.254601	1.19301	8.32878	2.89e-21	7.26e-21
SHMT2	-0.361621	0.778289	11.3717	6.95e-19	1.78e-18	0.480897	1.39561	11.3717	9.09e-21	3.23e-20	0.086386	1.06171	11.3717	0.0784155	0.0919225
C11orf31	-0.342804	0.788507	13.8857	7.43e-58	6.82e-57	0.480823	1.39554	13.8857	4.8e-72	9.42e-71	0.0597299	1.04227	13.8857	0.0237431	0.029127
PTBP1	-0.375105	0.771049	8.56098	6.81e-61	6.91e-60	0.480216	1.39495	8.56098	1.67e-62	2.49e-61	0.106139	1.07634	8.56098	0.000164585	0.00023161
ALX3	-0.247599	0.842297	7.27314	1.87e-18	4.71e-18	0.478781	1.39357	7.27314	3.28e-42	2.59e-41	-0.0736533	0.950229	7.27314	0.0303597	0.0369193
APOO	-0.180515	0.882388	10.9106	3.79e-15	8.47e-15	0.478509	1.3933	10.9106	5.2e-65	8.36e-64	-0.168676	0.889659	10.9106	8.08e-10	1.42e-09
TNFRSF10B	-0.854336	0.55312	8.61559	3.15e-156	9.35e-154	0.478366	1.39316	8.61559	1.8e-27	8.32e-27	0.788323	1.72707	8.61559	1.11e-86	1.14e-85
ZNF215	-0.377783	0.769619	5.94316	3.04e-31	1.14e-30	0.478181	1.39299	5.94316	2.62e-31	1.39e-30	0.111749	1.08054	5.94316	0.00460291	0.0059557
LCMT2	-0.0484691	0.966962	10.0512	0.0405445	0.0484252	0.478037	1.39285	10.0512	5.96e-62	8.72e-61	-0.355771	0.781452	10.0512	3.72e-38	1.43e-37
MAGEB2	-0.293959	0.815661	7.09541	4.31e-09	7.62e-09	0.477643	1.39247	7.09541	3.72e-14	9.99e-14	-0.00680842	0.995292	7.09541	0.909587	0.918148
PIH1D1	-0.430742	0.74188	10.3852	7.35e-68	9.61e-67	0.476988	1.39184	10.3852	2.12e-51	2.24e-50	0.188014	1.13919	10.3852	8.31e-10	1.46e-09
TTC26	-0.0944645	0.93662	7.2703	1.52e-05	2.27e-05	0.476501	1.39137	7.2703	1.21e-72	2.43e-71	-0.28909	0.818418	7.2703	1.58e-29	4.94e-29
POP7	-0.164235	0.892402	13.0887	1.56e-14	3.41e-14	0.476477	1.39134	13.0887	4.15e-75	8.75e-74	-0.18999	0.876612	13.0887	9.02e-14	1.81e-13
PURB	-0.465622	0.724159	8.61987	2.38e-102	1.01e-100	0.476307	1.39118	8.61987	1.61e-64	2.55e-63	0.238151	1.17948	8.61987	2.52e-18	5.83e-18
CHCHD3	-0.0483529	0.96704	10.8614	0.0450225	0.0535472	0.476095	1.39097	10.8614	5.28e-59	7.14e-58	-0.354211	0.782297	10.8614	2.12e-36	7.76e-36
GPS1	-0.134891	0.910738	12.1519	6.98e-10	1.28e-09	0.475096	1.39001	12.1519	1.67e-71	3.21e-70	-0.230433	0.852379	12.1519	5.98e-19	1.41e-18
ZNF607	-0.170152	0.888749	10.4064	2.53e-23	7.5e-23	0.474656	1.38959	10.4064	7.47e-121	3.86e-119	-0.17997	0.882721	10.4064	1.32e-18	3.08e-18
XRCC4	-0.228995	0.853229	9.23686	8.22e-25	2.55e-24	0.474588	1.38952	9.23686	2.74e-67	4.7e-66	-0.0963479	0.935398	9.23686	0.000339576	0.000470211
ARNTL2	-0.342452	0.7887	7.21407	1e-33	4.14e-33	0.47399	1.38895	7.21407	2.09e-40	1.53e-39	0.065299	1.0463	7.21407	0.0577741	0.0685442
BUB3	-0.0847047	0.942978	11.4387	0.00080519	0.00108435	0.472947	1.38794	11.4387	1.1e-52	1.21e-51	-0.299793	0.812369	11.4387	6.53e-24	1.76e-23
FUZ	-0.170784	0.88836	9.59146	8.47e-13	1.73e-12	0.472648	1.38765	9.59146	1.53e-58	2.04e-57	-0.177289	0.884363	9.59146	4.96e-10	8.8e-10
IGJ	-1.68905	0.310131	9.0787	7.28e-130	8.27e-128	0.471985	1.38702	9.0787	7.44e-07	1.38e-06	1.97934	3.94314	9.0787	6.92e-125	1.46e-123
NPPB	-0.352455	0.78325	7.83315	5.08e-25	1.58e-24	0.471882	1.38692	7.83315	5.93e-28	2.79e-27	0.0813772	1.05803	7.83315	0.0485775	0.0580255
HAPLN4	-0.242002	0.845571	7.1515	1.19e-16	2.83e-16	0.471483	1.38653	7.1515	2.47e-38	1.67e-37	-0.0751198	0.949263	7.1515	0.0325217	0.0394449
ZNF556	-0.162074	0.893739	6.37991	1.35e-05	2.02e-05	0.471453	1.38651	6.37991	3.98e-24	1.62e-23	-0.188596	0.877459	6.37991	2.15e-05	3.16e-05
ZSCAN2	-0.0139738	0.990361	8.09214	0.490978	0.51974	0.471102	1.38617	8.09214	1.35e-83	3.46e-82	-0.398597	0.758596	8.09214	2.75e-66	1.93e-65
TIFA	-0.650592	0.637019	7.16484	5.07e-118	3.67e-116	0.471077	1.38614	7.16484	4.17e-36	2.63e-35	0.505467	1.41958	7.16484	6.34e-47	2.96e-46
UQCRQ	-0.250367	0.840682	14.6263	1.09e-31	4.16e-31	0.471066	1.38613	14.6263	1.46e-71	2.83e-70	-0.0628701	0.957358	14.6263	0.0154328	0.0192048
ATIC	-0.201808	0.86946	11.5868	8.51e-20	2.24e-19	0.470537	1.38562	11.5868	3.36e-67	5.75e-66	-0.131357	0.912972	11.5868	8.13e-07	1.27e-06
COL25A1	-0.331315	0.794812	5.82047	1.35e-23	4.03e-23	0.470066	1.38517	5.82047	1.7e-29	8.46e-29	0.0529699	1.0374	5.82047	0.185405	0.209007
C4orf6	-0.238315	0.847735	6.20149	3.06e-08	5.2e-08	0.468901	1.38405	6.20149	4.21e-18	1.34e-17	-0.0780616	0.94733	6.20149	0.129506	0.148654
TRMT5	-0.0787188	0.946898	13.9342	0.000618785	0.000838487	0.468373	1.38355	13.9342	6.78e-63	1.02e-61	-0.30423	0.809874	13.9342	1.49e-29	4.64e-29
RAD18	-0.0565887	0.961535	7.98627	0.0309563	0.0373507	0.468277	1.38346	7.98627	6.15e-48	5.86e-47	-0.335572	0.79247	7.98627	9.67e-28	2.88e-27
TALDO1	-0.41797	0.748477	12.636	6.2e-106	3.02e-104	0.468206	1.38339	12.636	5.44e-81	1.31e-79	0.177678	1.13106	12.636	2.07e-13	4.1e-13
APOOL	-0.258398	0.836016	7.38411	1.03e-16	2.43e-16	0.467777	1.38298	7.38411	2.96e-33	1.69e-32	-0.0485439	0.966912	7.38411	0.194927	0.21908
SFXN2	-0.42016	0.747342	7.05066	1.95e-72	3.06e-71	0.466751	1.38199	7.05066	4.03e-55	4.76e-54	0.182079	1.13452	7.05066	3.26e-10	5.82e-10
BMP2	-0.824403	0.564716	6.87802	2.81e-81	5.91e-80	0.466534	1.38179	6.87802	2.57e-16	7.6e-16	0.756325	1.68918	6.87802	7.25e-47	3.37e-46
THOC6	-0.330098	0.795483	7.97276	1.38e-54	1.13e-53	0.466372	1.38163	7.97276	6.24e-69	1.11e-67	0.0545223	1.03852	7.97276	0.0371342	0.0448327
ZNF77	-0.0697679	0.952791	8.8075	0.00586783	0.00746481	0.466097	1.38137	8.8075	5.52e-51	5.77e-50	-0.31492	0.803896	8.8075	3.15e-26	9e-26
SFXN1	-0.115128	0.923301	8.05317	9.06e-08	1.51e-07	0.466083	1.38135	8.05317	3.86e-71	7.37e-70	-0.250493	0.840609	8.05317	6.49e-23	1.7e-22
MIPEP	-0.264571	0.832446	8.65251	7.88e-10	1.44e-09	0.46605	1.38132	8.65251	7.38e-18	2.32e-17	-0.0382446	0.973839	8.65251	0.458268	0.487834
RPRML	-0.379927	0.768476	7.05792	9.61e-23	2.78e-22	0.465822	1.3811	7.05792	1.91e-21	6.96e-21	0.125771	1.09109	7.05792	0.0071006	0.00907595
COIL	0.0307555	1.02155	9.00301	0.192866	0.214887	0.465352	1.38065	9.00301	7.82e-59	1.05e-57	-0.457008	0.728495	9.00301	3.7e-64	2.49e-63
HCFC1	-0.13201	0.912559	8.72483	8.32e-08	1.38e-07	0.464817	1.38014	8.72483	2.33e-53	2.62e-52	-0.225395	0.855361	8.72483	1.22e-14	2.51e-14
PXMP4	-0.286353	0.819972	8.5369	1.93e-38	9.22e-38	0.464629	1.37996	8.5369	3.27e-64	5.14e-63	-0.00605046	0.995815	8.5369	0.822451	0.836534
TMEM45B	-0.382247	0.767242	7.24029	1.33e-14	2.91e-14	0.46374	1.37911	7.24029	1.52e-13	3.96e-13	0.130915	1.09499	7.24029	0.0280479	0.034223
NCAPD3	0.0824772	1.05883	10.3024	0.00451096	0.00577417	0.463532	1.37891	10.3024	3.71e-38	2.5e-37	-0.52884	0.693112	10.3024	2.21e-56	1.27e-55
HS3ST4	-0.342538	0.788653	7.31413	1.57e-09	2.82e-09	0.463189	1.37859	7.31413	1.04e-10	2.37e-10	0.0750152	1.05337	7.31413	0.269627	0.297551
EXOC5	-0.119357	0.920598	8.50934	2.51e-07	4.08e-07	0.462586	1.37801	8.50934	3.55e-60	4.94e-59	-0.241382	0.845935	8.50934	1.17e-18	2.74e-18
DOLPP1	-0.0620297	0.957916	9.21518	0.00280251	0.00363755	0.462533	1.37796	9.21518	2.94e-76	6.35e-75	-0.322743	0.799548	9.21518	8.86e-41	3.59e-40
NPY	-0.379087	0.768924	15.4846	0.000121461	0.000172286	0.462457	1.37789	15.4846	0.000209511	0.000329902	0.127568	1.09245	15.4846	0.278731	0.306837
PIGA	-0.261307	0.834332	7.77655	3.69e-36	1.64e-35	0.462298	1.37773	7.77655	2.52e-72	4.98e-71	-0.0395472	0.97296	7.77655	0.118904	0.136865
ZNF239	0.0429107	1.03019	9.86448	0.218616	0.241833	0.462288	1.37773	9.86448	1.7e-26	7.57e-26	-0.471548	0.72119	9.86448	6.33e-31	2.04e-30
SSR4	-0.53216	0.691519	12.9688	7.48e-126	7.67e-124	0.462102	1.37755	12.9688	2.68e-55	3.18e-54	0.345257	1.27038	12.9688	1.67e-34	5.9e-34
PRKDC	-0.0900682	0.939478	9.33649	1.59e-05	2.36e-05	0.46208	1.37753	9.33649	5.48e-75	1.15e-73	-0.282524	0.822152	9.33649	7.32e-31	2.36e-30
SIX6	-0.238686	0.847517	6.91902	0.000133023	0.000188063	0.461931	1.37738	6.91902	4.5e-09	9.46e-09	-0.0713436	0.951751	6.91902	0.338822	0.36802
NUTF2	-0.225746	0.855153	11.637	1.54e-27	5.15e-27	0.461874	1.37733	11.637	1.92e-73	3.91e-72	-0.0896691	0.939738	11.637	0.000357389	0.000494167
ADNP2	-0.0572116	0.96112	9.93283	0.00975412	0.0122248	0.461175	1.37666	9.93283	4.54e-66	7.53e-65	-0.328379	0.796431	9.93283	4.04e-37	1.51e-36
SYT14	0.155377	1.11371	8.37313	6.96e-09	1.22e-08	0.460845	1.37635	8.37313	6.23e-44	5.22e-43	-0.629976	0.646187	8.37313	1.18e-96	1.45e-95
LMAN1	-0.553978	0.681139	8.48932	5.66e-95	1.85e-93	0.460832	1.37634	8.48932	2.47e-39	1.74e-38	0.377368	1.29897	8.48932	9.25e-30	2.9e-29
DHPS	0.0435649	1.03066	11.0209	0.0804484	0.093342	0.460812	1.37632	11.0209	1.53e-51	1.63e-50	-0.471166	0.721381	11.0209	4.46e-61	2.83e-60
ANP32B	-0.308458	0.807505	9.34202	1.86e-45	1.1e-44	0.460532	1.37605	9.34202	3.64e-64	5.69e-63	0.0289792	1.02029	9.34202	0.278308	0.3064
NAT10	-0.472354	0.720788	9.95765	4.53e-119	3.41e-117	0.46029	1.37582	9.95765	5.23e-67	8.88e-66	0.261937	1.19909	9.95765	3.14e-24	8.51e-24
ILF2	0.094762	1.06789	14.7423	6.99e-05	0.000100627	0.459564	1.37513	14.7423	5.03e-56	6.13e-55	-0.542761	0.686456	14.7423	7.83e-91	8.66e-90
GTF2E1	-0.156986	0.896897	10.4887	1.21e-12	2.46e-12	0.45926	1.37484	10.4887	7.34e-65	1.17e-63	-0.184992	0.879654	10.4887	2.16e-12	4.13e-12
FBXO8	-0.29552	0.814778	10.6502	6.03e-30	2.17e-29	0.458737	1.37434	10.6502	4.06e-45	3.52e-44	0.0122014	1.00849	10.6502	0.69904	0.721014
CABP1	-0.392604	0.761753	6.64983	1.24e-31	4.76e-31	0.458682	1.37429	6.64983	4.27e-27	1.95e-26	0.150116	1.10966	6.64983	0.000225361	0.000314842
PDZD8	-0.122547	0.918565	8.55375	3.93e-07	6.34e-07	0.458483	1.3741	8.55375	5.14e-54	5.88e-53	-0.233208	0.850741	8.55375	3.7e-16	7.98e-16
C12orf29	-0.114471	0.923721	9.57959	3.82e-06	5.89e-06	0.458331	1.37395	9.57959	2.55e-51	2.69e-50	-0.244541	0.844084	9.57959	7.33e-17	1.62e-16
CNGA3	-0.325385	0.798085	5.98702	3.74e-12	7.46e-12	0.458091	1.37372	5.98702	9.37e-15	2.58e-14	0.0551852	1.03899	5.98702	0.326129	0.354967
UTP18	-0.073785	0.950142	11.1123	0.00184512	0.00242533	0.458019	1.37365	11.1123	2.11e-56	2.61e-55	-0.30204	0.811105	11.1123	1.67e-27	4.94e-27
CPSF2	-0.289457	0.81821	7.6368	1.78e-52	1.34e-51	0.457667	1.37332	7.6368	2.4e-84	6.23e-83	0.0045408	1.00315	7.6368	0.846092	0.85862
RFESD	-0.260217	0.834962	7.33718	1.98e-19	5.15e-19	0.457631	1.37329	7.33718	7.5e-37	4.83e-36	-0.0369496	0.974714	7.33718	0.28834	0.316632
WDR5B	-0.172652	0.88721	7.5216	1.02e-12	2.08e-12	0.457483	1.37314	7.5216	4.34e-53	4.82e-52	-0.161165	0.894302	7.5216	2.58e-08	4.3e-08
POLR2H	-0.372766	0.7723	11.8764	1.18e-74	1.99e-73	0.457062	1.37274	11.8764	6.81e-70	1.25e-68	0.123383	1.08929	11.8764	1.19e-06	1.85e-06
HSPA6	-1.29726	0.406897	8.94837	1.28e-87	3.29e-86	0.457037	1.37272	8.94837	1.54e-07	2.96e-07	1.43626	2.70618	8.94837	1.13e-74	9.32e-74
KBTBD4	-0.150109	0.901182	8.64246	1.93e-09	3.45e-09	0.456798	1.37249	8.64246	8.58e-50	8.67e-49	-0.19257	0.875046	8.64246	9.86e-11	1.79e-10
WDR89	-0.230965	0.852065	8.11988	2.36e-28	8.05e-28	0.456684	1.37238	8.11988	1.74e-70	3.27e-69	-0.0776482	0.947601	8.11988	0.00217396	0.002868
SOCS4	-0.115638	0.922974	7.12848	1.62e-07	2.66e-07	0.456602	1.37231	7.12848	1.15e-64	1.83e-63	-0.241347	0.845955	7.12848	2.2e-20	5.39e-20
FADS2	-0.169945	0.888877	10.5965	3.33e-13	6.93e-13	0.456397	1.37211	10.5965	5.28e-57	6.66e-56	-0.164046	0.892518	10.5965	4.06e-09	6.95e-09
PSMD12	-0.252568	0.839401	11.0491	1.15e-33	4.75e-33	0.456364	1.37208	11.0491	4.6e-70	8.46e-69	-0.0466862	0.968158	11.0491	0.0661241	0.0779637
ZNF195	0.0120446	1.00838	11.0317	0.69036	0.712886	0.456063	1.37179	11.0317	3.64e-34	2.15e-33	-0.422187	0.746293	11.0317	5.63e-33	1.92e-32
NUDT21	-0.198808	0.87127	11.461	1.85e-22	5.3e-22	0.455836	1.37158	11.461	9.7e-75	2.03e-73	-0.122559	0.918557	11.461	5.95e-07	9.37e-07
LETM1	-0.240581	0.846404	9.0576	1.29e-31	4.94e-31	0.455803	1.37155	9.0576	1.92e-72	3.81e-71	-0.0632104	0.957132	9.0576	0.0113624	0.0143086
EIF2S1	-0.20403	0.868122	9.88331	1.14e-20	3.09e-20	0.455679	1.37143	9.88331	2.21e-64	3.48e-63	-0.115005	0.923379	9.88331	1.26e-05	1.88e-05
RMND5B	-0.234466	0.849999	10.1055	2.61e-31	9.84e-31	0.455676	1.37143	10.1055	1.02e-75	2.19e-74	-0.0717809	0.951463	10.1055	0.0033246	0.00434049
SGOL1	-0.0971037	0.934908	7.26052	0.00991839	0.012424	0.455585	1.37134	7.26052	3.34e-22	1.26e-21	-0.266764	0.831182	7.26052	2.37e-09	4.1e-09
MRPL47	-0.214197	0.862026	11.7175	5.19e-24	1.56e-23	0.455464	1.37122	11.7175	1.55e-68	2.73e-67	-0.100376	0.93279	11.7175	8.68e-05	0.000123691
FTSJ2	-0.117203	0.921973	10.277	1.09e-07	1.81e-07	0.455444	1.3712	10.277	2.53e-64	3.98e-63	-0.238097	0.847863	10.277	7.18e-20	1.73e-19
TIMM9	-0.202055	0.869312	11.2102	1.17e-22	3.38e-22	0.455371	1.37113	11.2102	9.61e-73	1.93e-71	-0.117536	0.92176	11.2102	2.23e-06	3.42e-06
PDHA1	-0.289793	0.818019	12.034	1.67e-58	1.55e-57	0.455215	1.37099	12.034	2.74e-93	8.76e-92	0.00719629	1.005	12.034	0.74612	0.764873
COPE	-0.284792	0.82086	10.2231	3.26e-38	1.55e-37	0.455107	1.37088	10.2231	8.61e-62	1.26e-60	0.000189989	1.00013	10.2231	0.994364	0.994708
SMARCA5	-0.11839	0.921215	9.56998	2.73e-07	4.44e-07	0.455057	1.37084	9.56998	9.38e-59	1.26e-57	-0.236066	0.849057	9.56998	4.6e-18	1.05e-17
POLR2L	-0.584147	0.667044	11.9091	9.69e-108	4.99e-106	0.454488	1.3703	11.9091	1.7e-38	1.16e-37	0.425845	1.34336	11.9091	4.74e-38	1.81e-37
BRMS1L	0.0345553	1.02424	9.06863	0.148941	0.168048	0.454457	1.37027	9.06863	1.98e-54	2.3e-53	-0.452727	0.73066	9.06863	4.08e-61	2.59e-60
PTPN13	-0.674846	0.626399	8.62453	1.26e-71	1.91e-70	0.454453	1.37026	8.62453	3.04e-20	1.06e-19	0.554674	1.46884	8.62453	2.16e-33	7.45e-33
ZDHHC15	0.179173	1.13223	7.62812	2.52e-11	4.87e-11	0.453548	1.3694	7.62812	2.6e-42	2.06e-41	-0.657286	0.63407	7.62812	1.04e-105	1.54e-104
PRMT3	-0.2106	0.864177	7.95763	8.29e-21	2.26e-20	0.453406	1.36927	7.95763	4.87e-60	6.75e-59	-0.103656	0.930672	7.95763	0.000131402	0.00018584
TMEM54	-0.947672	0.518468	8.51568	3e-70	4.28e-69	0.453188	1.36906	8.51568	1.15e-10	2.62e-10	0.94323	1.92283	8.51568	3.27e-48	1.57e-47
ZC3H14	-0.110285	0.926405	9.70065	3.68e-08	6.24e-08	0.452949	1.36884	9.70065	3.63e-78	8.25e-77	-0.245705	0.843403	9.70065	2.25e-25	6.3e-25
SLC35A4	-0.526632	0.694173	9.45904	1.87e-127	2e-125	0.452845	1.36874	9.45904	8.49e-55	9.96e-54	0.345629	1.27071	9.45904	1.09e-35	3.95e-35
NFATC3	-0.435683	0.739344	9.22519	6.88e-92	2.07e-90	0.45276	1.36866	9.22519	3.04e-60	4.26e-59	0.216551	1.16195	9.22519	6.94e-16	1.48e-15
MRPL28	-0.244886	0.843883	11.4364	3.17e-27	1.05e-26	0.45214	1.36807	11.4364	2.36e-58	3.12e-57	-0.053844	0.963366	11.4364	0.0497764	0.0594269
MRPS14	-0.322098	0.799906	10.5628	2.36e-55	1.99e-54	0.45171	1.36766	10.5628	7.87e-69	1.4e-67	0.0561843	1.03971	10.5628	0.0266792	0.0326044
MCTS1	-0.295736	0.814656	11.5379	3.77e-32	1.47e-31	0.451669	1.36762	11.5379	5.55e-47	5.13e-46	0.0187857	1.01311	11.5379	0.537432	0.565865
PGK1	-0.400632	0.757526	10.7907	1.62e-62	1.74e-61	0.4509	1.36689	10.7907	4.51e-49	4.46e-48	0.168427	1.12383	10.7907	1.32e-08	2.22e-08
SMARCD2	-0.408338	0.753491	9.91822	9.37e-75	1.59e-73	0.450782	1.36678	9.91822	4.31e-56	5.27e-55	0.179475	1.13247	9.91822	9.7e-11	1.76e-10
TOMM22	-0.240879	0.84623	11.6922	3.87e-19	9.97e-19	0.450656	1.36666	11.6922	4.64e-41	3.49e-40	-0.0582156	0.960451	11.6922	0.0729327	0.0857383
FTSJ3	-0.227578	0.854068	11.6394	3.79e-16	8.8e-16	0.4501	1.36614	11.6394	3.22e-38	2.17e-37	-0.0766105	0.948283	11.6394	0.0225646	0.0277252
FARSA	-0.240021	0.846733	10.7639	9.04e-26	2.88e-25	0.449752	1.36581	10.7639	1e-56	1.25e-55	-0.0586302	0.960175	10.7639	0.0340975	0.0412827
CDCA7L	-0.491832	0.711121	9.56885	4.15e-37	1.9e-36	0.448718	1.36483	9.56885	1.09e-19	3.71e-19	0.299876	1.23104	9.56885	1.55e-10	2.8e-10
APOM	-0.248182	0.841957	8.66444	3.79e-12	7.54e-12	0.448369	1.3645	8.66444	1.57e-23	6.24e-23	-0.0458132	0.968744	8.66444	0.28528	0.31351
TMEM101	-0.264365	0.832565	10.476	6.31e-29	2.19e-28	0.448195	1.36433	10.476	3.9e-52	4.23e-51	-0.0226785	0.984403	10.476	0.429971	0.459442
NDUFA2	-0.316144	0.803214	12.483	2.39e-59	2.3e-58	0.447428	1.36361	12.483	2.14e-75	4.56e-74	0.0515337	1.03637	12.483	0.0322558	0.0391347
ALKBH1	-0.0997613	0.933187	8.94263	9.24e-06	1.4e-05	0.44723	1.36342	8.94263	1.3e-59	1.78e-58	-0.255569	0.837657	8.94263	5.76e-22	1.47e-21
ADCY8	-0.352676	0.78313	6.43531	2.42e-08	4.13e-08	0.446704	1.36292	6.43531	2.29e-08	4.62e-08	0.104055	1.07479	6.43531	0.168963	0.19146
GPC2	0.268432	1.2045	13.1991	1.05e-11	2.05e-11	0.446652	1.36287	13.1991	2.4e-19	8.03e-19	-0.777915	0.583209	13.1991	8.58e-66	5.99e-65
TMEM180	-0.158578	0.895908	10.5146	2.53e-10	4.7e-10	0.446436	1.36267	10.5146	3.5e-47	3.26e-46	-0.17134	0.888017	10.5146	1.01e-08	1.7e-08
SMARCA4	0.0131943	1.00919	12.3831	0.660896	0.684657	0.44641	1.36265	12.3831	4.36e-33	2.47e-32	-0.415245	0.749892	12.3831	3.04e-32	1.02e-31
ZNF652	-0.0706687	0.952197	9.86202	0.0283668	0.0343229	0.446316	1.36256	9.86202	8.07e-29	3.92e-28	-0.296071	0.814468	9.86202	7.88e-15	1.63e-14
ZNF354A	0.0760988	1.05416	9.80181	0.0198069	0.0242904	0.446245	1.36249	9.80181	4.43e-28	2.09e-27	-0.504427	0.70494	9.80181	2.88e-40	1.15e-39
PRPS1	-0.386962	0.764738	10.2907	2.64e-64	3.05e-63	0.445893	1.36216	10.2907	5.94e-53	6.56e-52	0.153463	1.11224	10.2907	5.59e-08	9.2e-08
SSX1	-0.262594	0.833588	5.44046	2.35e-09	4.21e-09	0.445457	1.36175	5.44046	8.64e-16	2.49e-15	-0.0227611	0.984347	5.44046	0.665648	0.689149
ENO1	-0.357301	0.780623	12.6649	8.46e-44	4.72e-43	0.444991	1.36131	12.6649	1.79e-42	1.43e-41	0.112144	1.08083	12.6649	0.000367581	0.000507775
NARF	-0.101265	0.932216	12.2168	7.14e-06	1.08e-05	0.444368	1.36072	12.2168	1.7e-58	2.26e-57	-0.250892	0.840377	12.2168	4.2e-21	1.05e-20
TTLL6	-0.224227	0.856053	6.54051	2.66e-07	4.32e-07	0.444053	1.36042	6.54051	5.25e-16	1.53e-15	-0.0759969	0.948686	6.54051	0.1447	0.165194
SLC39A3	-0.258105	0.836186	7.87095	1.7e-30	6.25e-30	0.44402	1.36039	7.87095	7.81e-57	9.78e-56	-0.0278596	0.980874	7.87095	0.307603	0.336002
SENP5	-0.299925	0.812295	8.30802	1.91e-57	1.73e-56	0.443782	1.36017	8.30802	2.94e-80	6.96e-79	0.0317398	1.02224	8.30802	0.171293	0.193947
CHKA	-0.275694	0.826053	10.1054	4.94e-40	2.46e-39	0.443672	1.36006	10.1054	7.39e-66	1.22e-64	-0.00257259	0.998218	10.1054	0.919457	0.927288
SAP30BP	-0.159368	0.895417	10.8306	2.81e-18	7.04e-18	0.443075	1.3595	10.8306	1.08e-89	3.22e-88	-0.167232	0.890549	10.8306	1.88e-14	3.85e-14
CBLL1	-0.119576	0.920458	8.86762	1.67e-07	2.74e-07	0.443069	1.35949	8.86762	1.86e-56	2.31e-55	-0.223735	0.856345	8.86762	1.4e-16	3.06e-16
NSDHL	-0.302575	0.810804	8.08491	2.4e-28	8.17e-28	0.443026	1.35945	8.08491	6.97e-38	4.64e-37	0.0361738	1.02539	8.08491	0.276295	0.304329
GPR56	-0.293035	0.816183	11.3736	5.42e-13	1.12e-12	0.442893	1.35933	11.3736	5.07e-18	1.61e-17	0.0227459	1.01589	11.3736	0.640907	0.665736
ZNF121	-0.191693	0.875578	6.88394	7.56e-18	1.87e-17	0.442886	1.35932	6.88394	1.13e-58	1.52e-57	-0.121162	0.919447	6.88394	5.91e-06	8.9e-06
KARS	-0.183868	0.880339	10.7202	1.86e-12	3.76e-12	0.442646	1.35909	10.7202	1.35e-42	1.08e-41	-0.13206	0.912528	10.7202	2.38e-05	3.48e-05
SPATA5	-0.161127	0.894326	7.40589	4.71e-17	1.13e-16	0.442567	1.35902	7.40589	1.63e-80	3.88e-79	-0.164285	0.892371	7.40589	7.95e-13	1.55e-12
ALG13	-0.416795	0.749087	9.22097	1.12e-80	2.3e-79	0.442532	1.35899	9.22097	1.17e-55	1.4e-54	0.198812	1.14775	9.22097	3.17e-13	6.24e-13
SPDYA	-0.156502	0.897198	5.91064	6.03e-13	1.24e-12	0.442402	1.35887	5.91064	4.99e-62	7.32e-61	-0.170705	0.888409	5.91064	4.64e-11	8.52e-11
PCDH17	-0.116054	0.922708	10.6474	0.0180479	0.0222061	0.441783	1.35828	10.6474	7.71e-13	1.95e-12	-0.227594	0.854058	10.6474	9.74e-05	0.000138396
MRPL17	-0.477522	0.71821	10.1433	1.18e-89	3.25e-88	0.441568	1.35808	10.1433	3.09e-46	2.78e-45	0.285906	1.21918	10.1433	4.73e-22	1.21e-21
MRPL9	-0.145647	0.903974	12.9312	6.69e-16	1.54e-15	0.441391	1.35791	12.9312	6.14e-92	1.93e-90	-0.185222	0.879514	12.9312	6.13e-18	1.4e-17
C21orf119	-0.199453	0.870881	9.02431	3.48e-12	6.94e-12	0.441172	1.35771	9.02431	4.66e-35	2.82e-34	-0.108619	0.927475	9.02431	0.00156806	0.00208912
SHQ1	-0.276923	0.825349	8.25684	1.42e-40	7.19e-40	0.440955	1.3575	8.25684	2.59e-65	4.2e-64	0.00158625	1.0011	8.25684	0.950175	0.955786
RBMX2	-0.343121	0.788334	10.2042	2.47e-63	2.74e-62	0.440854	1.35741	10.2042	1.63e-65	2.67e-64	0.0956814	1.06857	10.2042	0.000154725	0.000218026
DHX9	-0.0293568	0.979857	11.6941	0.174911	0.195786	0.440751	1.35731	11.6941	4.43e-63	6.71e-62	-0.349794	0.784696	11.6941	3.36e-44	1.48e-43
FEM1A	-0.239059	0.847298	9.08938	2.8e-25	8.8e-25	0.439062	1.35572	9.08938	2.69e-53	3.01e-52	-0.0505018	0.9656	9.08938	0.0696766	0.082027
AQP9	-0.925088	0.526649	7.16183	4.1e-45	2.39e-44	0.438819	1.35549	7.16183	2.49e-07	4.74e-07	0.923921	1.89726	7.16183	1.13e-31	3.75e-31
XRCC6BP1	-0.120424	0.919917	8.30217	3.07e-07	4.97e-07	0.438767	1.35545	8.30217	4.08e-52	4.42e-51	-0.21871	0.859333	8.30217	4.42e-15	9.24e-15
SPATA17	-0.237824	0.848024	6.12013	2.77e-16	6.46e-16	0.438702	1.35538	6.12013	1.45e-33	8.37e-33	-0.0519365	0.964641	6.12013	0.13737	0.157244
TIGD7	-0.134247	0.911145	8.15556	3.07e-09	5.46e-09	0.438488	1.35518	8.15556	3.66e-56	4.48e-55	-0.198832	0.871256	8.15556	1.48e-13	2.96e-13
SHFM1	-0.374798	0.771213	13.6079	6.13e-84	1.43e-82	0.437765	1.3545	13.6079	1.02e-70	1.93e-69	0.143409	1.10451	13.6079	2.9e-09	4.98e-09
FIBP	-0.25393	0.838609	11.1308	2.74e-26	8.84e-26	0.437434	1.35419	11.1308	1.08e-48	1.05e-47	-0.0279385	0.980821	11.1308	0.335164	0.364321
MAEL	-0.272702	0.827768	6.27087	3.79e-06	5.84e-06	0.437394	1.35416	6.27087	4.23e-09	8.9e-09	-0.00124445	0.999138	6.27087	0.985919	0.98771
LRRC61	-0.0286473	0.980339	10.4504	0.299116	0.326116	0.437155	1.35393	10.4504	1.12e-37	7.41e-37	-0.347608	0.785886	10.4504	5.98e-27	1.74e-26
MRPL51	-0.27836	0.824527	13.5821	1.72e-59	1.67e-58	0.436919	1.35371	13.5821	8.55e-95	2.81e-93	0.00721221	1.00501	13.5821	0.733473	0.753175
PIK3R3	-0.167984	0.890085	8.63153	7.52e-10	1.37e-09	0.436862	1.35366	8.63153	4.84e-38	3.25e-37	-0.149479	0.901576	8.63153	4.54e-06	6.89e-06
CCDC138	0.0587742	1.04158	7.09546	0.0157216	0.0194243	0.43676	1.35356	7.09546	1.94e-48	1.87e-47	-0.471401	0.721264	7.09546	3.07e-64	2.08e-63
CIRH1A	-0.175234	0.885624	10.6308	1.14e-17	2.81e-17	0.43662	1.35343	10.6308	5.07e-68	8.85e-67	-0.138968	0.908168	10.6308	1.5e-08	2.51e-08
MCC	-0.0601169	0.959186	8.9252	0.128342	0.145772	0.436321	1.35315	8.9252	1.1e-18	3.58e-18	-0.302177	0.811028	8.9252	1.11e-10	2.01e-10
CWF19L1	-0.217853	0.859844	9.16894	1.52e-20	4.12e-20	0.436031	1.35288	9.16894	7.15e-51	7.45e-50	-0.0779235	0.94742	9.16894	0.00582704	0.00749774
IRX5	-0.531896	0.691645	8.47174	9.07e-20	2.38e-19	0.435753	1.35262	8.47174	4.78e-09	1e-08	0.368285	1.29082	8.47174	1.56e-07	2.52e-07
SYTL4	0.119716	1.08652	10.6441	0.0072373	0.0091567	0.435697	1.35256	10.6441	6.69e-15	1.86e-14	-0.556997	0.679715	10.6441	1.78e-26	5.12e-26
CHML	0.0435979	1.03068	9.27416	0.0965279	0.11113	0.435327	1.35222	9.27416	2.5e-41	1.91e-40	-0.448577	0.732765	9.27416	1.42e-49	7e-49
CLK2	-0.234156	0.850182	9.35359	1.31e-33	5.38e-33	0.435327	1.35222	9.35359	2.41e-74	4.97e-73	-0.0541474	0.963163	9.35359	0.0215859	0.0265565
MIF4GD	-0.359077	0.779663	9.15081	8.51e-46	5.07e-45	0.435146	1.35205	9.15081	5.22e-42	4.08e-41	0.123411	1.08931	9.15081	6.63e-05	9.5e-05
ZNHIT2	-0.353287	0.782799	8.22408	8.05e-41	4.12e-40	0.435143	1.35205	8.22408	1.01e-38	6.99e-38	0.11519	1.08312	8.22408	0.000351299	0.000485967
ENSA	-0.398351	0.758725	9.24049	3.7e-73	5.94e-72	0.435107	1.35201	9.24049	9.84e-54	1.11e-52	0.179217	1.13227	9.24049	5.41e-11	9.92e-11
SNW1	-0.163575	0.89281	12.0595	6.7e-17	1.6e-16	0.433696	1.35069	12.0595	8.13e-74	1.67e-72	-0.152928	0.899423	12.0595	6.71e-11	1.23e-10
NDUFS3	-0.307829	0.807856	12.653	2.01e-48	1.32e-47	0.433615	1.35061	12.653	1.39e-60	1.97e-59	0.0519945	1.0367	12.653	0.044311	0.0531099
THTPA	-0.20271	0.868917	10.0094	1.68e-18	4.25e-18	0.433178	1.3502	10.0094	6.45e-52	6.93e-51	-0.0968936	0.935044	10.0094	0.000487243	0.000668847
TIMM8A	-0.331749	0.794573	8.12459	3.14e-61	3.22e-60	0.432419	1.34949	8.12459	2.77e-65	4.5e-64	0.0870243	1.06218	8.12459	0.000462991	0.000636387
TMCO1	-0.230785	0.852171	12.1241	2.95e-26	9.5e-26	0.431763	1.34888	12.1241	1.09e-57	1.4e-56	-0.0557685	0.962082	12.1241	0.0343057	0.0415304
APOA1BP	-0.302688	0.810741	11.7069	2.49e-40	1.25e-39	0.431716	1.34884	11.7069	1.48e-51	1.57e-50	0.0463805	1.03267	11.7069	0.0954708	0.111073
SSNA1	-0.348454	0.785425	10.5795	2.93e-67	3.76e-66	0.431676	1.3488	10.5795	2.1e-64	3.31e-63	0.111408	1.08028	10.5795	7.96e-06	1.19e-05
NCBP2	-0.139782	0.907657	10.6671	6.39e-11	1.22e-10	0.431635	1.34876	10.6671	4.4e-61	6.33e-60	-0.184886	0.879719	10.6671	3.78e-13	7.43e-13
RBL1	-0.125851	0.916463	6.94155	7.86e-11	1.49e-10	0.431462	1.3486	6.94155	1.53e-75	3.25e-74	-0.204514	0.867831	6.94155	4.83e-19	1.14e-18
NOLC1	-0.189423	0.876956	10.8991	8.27e-20	2.18e-19	0.430981	1.34815	10.8991	7.53e-64	1.17e-62	-0.113811	0.924144	10.8991	5.32e-06	8.02e-06
WDR35	-0.108727	0.927406	7.98166	4.19e-06	6.44e-06	0.430814	1.34799	7.98166	8.28e-50	8.39e-49	-0.228257	0.853666	7.98166	3.33e-16	7.2e-16
KRT33A	-0.186906	0.878488	7.78531	2e-05	2.96e-05	0.430751	1.34793	7.78531	5.21e-15	1.46e-14	-0.11718	0.921988	7.78531	0.0251173	0.0307573
ALKBH2	-0.0857922	0.942267	10.4301	0.000210528	0.000293801	0.430744	1.34793	10.4301	4.78e-52	5.16e-51	-0.260763	0.834646	10.4301	1.18e-21	3.01e-21
HMGN2	-0.0840449	0.943409	13.986	0.000398033	0.000545934	0.430495	1.3477	13.986	2.09e-49	2.08e-48	-0.263024	0.83334	13.986	5.3e-21	1.32e-20
ZNF214	0.00296295	1.00206	7.50767	0.939499	0.945376	0.430098	1.34733	7.50767	1.23e-18	4.01e-18	-0.386228	0.765128	7.50767	4.96e-17	1.1e-16
SPIN3	-0.0185077	0.987253	8.7955	0.439985	0.46863	0.429825	1.34707	8.7955	1.96e-48	1.89e-47	-0.355495	0.781601	8.7955	3.52e-37	1.31e-36
KTI12	-0.261719	0.834093	8.35618	7.96e-37	3.61e-36	0.429542	1.34681	8.35618	7.21e-63	1.09e-61	-0.00986697	0.993184	8.35618	0.695141	0.717247
CENPP	-0.00948304	0.993448	9.23992	0.72573	0.746084	0.429332	1.34661	9.23992	7.23e-38	4.81e-37	-0.367873	0.774924	9.23992	2.41e-31	7.9e-31
CECR6	0.205975	1.15347	9.94599	2.9e-10	5.39e-10	0.429312	1.34659	9.94599	8.85e-26	3.82e-25	-0.67382	0.626845	9.94599	1.24e-72	9.86e-72
UPF3B	-0.144087	0.904952	10.1091	1.02e-11	2e-11	0.429047	1.34634	10.1091	1.52e-61	2.21e-60	-0.176474	0.884863	10.1091	2.64e-12	5.04e-12
THAP10	0.100643	1.07225	9.27317	0.000166731	0.000234347	0.428893	1.3462	9.27317	1.75e-38	1.19e-37	-0.52387	0.695504	9.27317	1.18e-65	8.23e-65
DPY19L3	-0.166888	0.890762	8.54567	5.51e-12	1.09e-11	0.428878	1.34619	8.54567	1.48e-46	1.33e-45	-0.143944	0.905042	8.54567	6.63e-07	1.04e-06
CSTF1	-0.201817	0.869455	10.733	2.13e-29	7.52e-29	0.428866	1.34618	10.733	9.66e-86	2.59e-84	-0.0943326	0.936705	10.733	1.38e-05	2.04e-05
DGKE	-0.169167	0.889356	6.2585	2.25e-13	4.71e-13	0.428573	1.3459	6.2585	2.9e-51	3.05e-50	-0.140437	0.907244	6.2585	3.61e-07	5.76e-07
ZBED5	-0.086572	0.941758	9.72758	0.00103327	0.0013814	0.428499	1.34583	9.72758	1.76e-39	1.25e-38	-0.257662	0.836443	9.72758	1.41e-16	3.08e-16
DCBLD2	-0.248588	0.84172	8.36324	4.01e-30	1.45e-29	0.428304	1.34565	8.36324	2.82e-56	3.48e-55	-0.0274143	0.981177	8.36324	0.300255	0.328533
ADCK1	-0.204394	0.867903	8.00753	1.4e-15	3.18e-15	0.427769	1.34515	8.00753	3.47e-41	2.62e-40	-0.0896978	0.93972	8.00753	0.00352836	0.00459719
PPID	-0.216127	0.860874	9.77635	2.53e-20	6.77e-20	0.427706	1.34509	9.77635	4e-49	3.96e-48	-0.0729807	0.950672	9.77635	0.00965277	0.0122235
C19orf57	0.101023	1.07253	9.70908	0.00129455	0.00172097	0.427379	1.34479	9.70908	7.86e-28	3.68e-27	-0.523064	0.695892	9.70908	7.05e-47	3.28e-46
MORF4L2	-0.212417	0.86309	10.8546	1.26e-18	3.2e-18	0.427185	1.34461	10.8546	3.57e-46	3.2e-45	-0.0777855	0.947511	10.8546	0.00736861	0.00940502
FBXO22	-0.0727688	0.950811	8.8965	0.000249237	0.000346236	0.426927	1.34437	8.8965	1.92e-70	3.6e-69	-0.275867	0.825954	8.8965	1.71e-32	5.78e-32
MRPS34	-0.24047	0.846469	12.9664	2.41e-41	1.25e-40	0.426694	1.34415	12.9664	4.22e-84	1.09e-82	-0.0375117	0.974334	12.9664	0.0857345	0.100168
TOB1	-0.469594	0.722168	9.49651	4.48e-56	3.86e-55	0.426653	1.34411	9.49651	8.34e-29	4.05e-28	0.287896	1.22086	9.49651	2.71e-15	5.7e-15
CBR4	-0.14394	0.905044	8.74675	1.37e-09	2.47e-09	0.426585	1.34405	8.74675	4.89e-48	4.68e-47	-0.174496	0.886077	8.74675	7.06e-10	1.24e-09
PPP1R1C	-0.469293	0.722319	7.02321	1.52e-22	4.38e-22	0.426305	1.34379	7.02321	3.14e-12	7.7e-12	0.287777	1.22076	7.02321	6.48e-07	1.02e-06
SSSCA1	-0.463458	0.725246	10.0803	1.1e-81	2.36e-80	0.42575	1.34327	10.0803	7.57e-42	5.88e-41	0.279984	1.21418	10.0803	1.08e-20	2.68e-20
DNAJB1	-0.595619	0.66176	11.1169	2.05e-46	1.26e-45	0.425735	1.34326	11.1169	2.31e-15	6.56e-15	0.467675	1.38288	11.1169	1.92e-20	4.71e-20
ZNF26	-0.153895	0.89882	9.71109	8.01e-12	1.58e-11	0.425598	1.34313	9.71109	2.71e-53	3.03e-52	-0.159482	0.895347	9.71109	2.9e-09	5e-09
ARHGDIA	-0.246363	0.843019	8.54816	9.15e-20	2.4e-19	0.425418	1.34296	8.54816	3.51e-36	2.21e-35	-0.0280117	0.980771	8.54816	0.390939	0.420411
CNTD2	-0.196821	0.872471	7.57935	1.07e-13	2.26e-13	0.424948	1.34252	7.57935	4.81e-38	3.23e-37	-0.0979468	0.934362	7.57935	0.00204651	0.00270355
SIN3B	-0.33563	0.792438	8.81747	1.96e-41	1.02e-40	0.424893	1.34247	8.81747	1.55e-41	1.19e-40	0.0992207	1.07119	8.81747	0.00109963	0.0014783
ZNF71	-0.0438346	0.970073	10.388	0.0643287	0.0753788	0.424838	1.34242	10.388	2.3e-48	2.21e-47	-0.315099	0.803796	10.388	6.37e-30	2e-29
ETV5	-0.514386	0.700091	7.69883	3.09e-37	1.43e-36	0.424767	1.34236	7.69883	2.14e-16	6.34e-16	0.353179	1.27737	7.69883	4.78e-13	9.39e-13
TFAP2D	-0.22681	0.854522	5.4088	1.21e-12	2.47e-12	0.424575	1.34218	5.4088	2.64e-26	1.17e-25	-0.0550283	0.962576	5.4088	0.150933	0.172056
PKNOX1	-0.151384	0.900386	9.79584	1.07e-13	2.26e-13	0.424306	1.34193	9.79584	4.34e-65	7.01e-64	-0.1619	0.893847	9.79584	2.74e-11	5.07e-11
NAT8L	-0.116655	0.922324	8.99158	0.000785396	0.0010588	0.423934	1.34158	8.99158	1.53e-22	5.86e-22	-0.210887	0.864006	8.99158	3.31e-07	5.28e-07
MRPL23	-0.379779	0.768555	10.6518	5.14e-63	5.62e-62	0.423586	1.34126	10.6518	1.52e-48	1.47e-47	0.163076	1.11967	10.6518	5.59e-09	9.54e-09
COL9A2	-0.170312	0.88865	9.66703	0.000289274	0.000399984	0.42339	1.34108	9.66703	7.73e-13	1.95e-12	-0.134207	0.91117	9.66703	0.0166462	0.0206548
PHTF2	-0.0844091	0.943171	7.85542	0.000353612	0.000486505	0.422947	1.34066	7.85542	4.48e-48	4.3e-47	-0.255802	0.837522	7.85542	4.33e-20	1.05e-19
SLC25A13	-0.122902	0.918338	9.57675	6.8e-08	1.14e-07	0.422788	1.34052	9.57675	1.47e-51	1.56e-50	-0.200998	0.869949	9.57675	1.05e-13	2.11e-13
GRP	-0.457329	0.728334	7.47451	2.56e-13	5.34e-13	0.422785	1.34051	7.47451	9.85e-08	1.92e-07	0.273913	1.20908	7.47451	0.000256248	0.000356959
SFXN4	-0.290811	0.817442	9.37406	2.36e-33	9.63e-33	0.422535	1.34028	9.37406	4.47e-44	3.76e-43	0.0376696	1.02645	9.37406	0.200067	0.224596
NDUFB7	-0.247945	0.842095	12.1348	1.04e-37	4.86e-37	0.422189	1.33996	12.1348	1.05e-69	1.91e-68	-0.0228968	0.984254	12.1348	0.331303	0.360226
ZSCAN16	0.1907	1.14132	9.59871	4.98e-13	1.03e-12	0.421753	1.33955	9.59871	9.19e-38	6.1e-37	-0.645415	0.639309	9.59871	3.15e-105	4.6e-104
ELMOD2	-0.111569	0.925581	9.2188	7.3e-08	1.22e-07	0.421684	1.33949	9.2188	1.97e-62	2.93e-61	-0.216111	0.860883	9.2188	1.22e-18	2.85e-18
EIF3M	-0.23993	0.846786	13.1606	2.85e-21	7.86e-21	0.420938	1.3388	13.1606	2.24e-40	1.64e-39	-0.0331668	0.977273	13.1606	0.278193	0.306303
TOMM70A	-0.0321796	0.977942	10.0163	0.18278	0.204062	0.420508	1.3384	10.0163	1.45e-45	1.28e-44	-0.327805	0.796748	10.0163	3.7e-31	1.21e-30
ZNF572	-0.0867731	0.941627	9.10969	0.000343754	0.000473505	0.420313	1.33822	9.10969	4.75e-45	4.11e-44	-0.250105	0.840835	9.10969	2.36e-18	5.45e-18
ARL5B	-0.0774679	0.94772	8.10269	0.00205887	0.00269498	0.420142	1.33806	8.10269	7.63e-42	5.92e-41	-0.263167	0.833257	8.10269	7.1e-19	1.67e-18
H2AFY	-0.124455	0.91735	13.3179	2.33e-10	4.34e-10	0.420058	1.33798	13.3179	3.5e-69	6.28e-68	-0.196368	0.872745	13.3179	3.47e-17	7.73e-17
CYB5B	-0.198464	0.871478	10.1785	1.21e-12	2.46e-12	0.419813	1.33775	10.1785	2e-33	1.15e-32	-0.0910528	0.938837	10.1785	0.00656494	0.00841448
TSPAN33	-0.852478	0.553833	6.99088	4.3e-134	5.47e-132	0.419798	1.33774	6.99088	5e-19	1.65e-18	0.837705	1.7872	6.99088	1.51e-86	1.54e-85
PPP1R15B	-0.32676	0.797325	7.89844	6.93e-48	4.47e-47	0.419676	1.33763	7.89844	1.91e-49	1.9e-48	0.0912588	1.0653	7.89844	0.000930731	0.00125839
CDK6	0.283997	1.21756	11.8466	7.5e-11	1.42e-10	0.419371	1.33734	11.8466	2.53e-14	6.86e-14	-0.775788	0.58407	11.8466	3.99e-53	2.12e-52
TMEM106C	-0.171373	0.887997	12.398	5.64e-14	1.21e-13	0.418682	1.33671	12.398	5.25e-50	5.36e-49	-0.128518	0.914771	12.398	2.52e-06	3.86e-06
IRAK1	-0.519569	0.69758	9.94741	8.61e-88	2.23e-86	0.418312	1.33636	9.94741	2.55e-34	1.51e-33	0.366271	1.28902	9.94741	1.1e-29	3.44e-29
SPCS3	-0.652883	0.636008	10.5791	1.11e-145	2.62e-143	0.418094	1.33616	10.5791	8.61e-34	5.02e-33	0.555781	1.46996	10.5791	2.01e-68	1.46e-67
PDCD5	-0.163612	0.892787	11.6972	1.35e-16	3.19e-16	0.41809	1.33616	11.6972	8.24e-67	1.39e-65	-0.139014	0.908139	11.6972	4.44e-09	7.59e-09
IMPDH1	-0.350232	0.784458	8.60749	4.4e-46	2.66e-45	0.417773	1.33586	8.60749	6.11e-41	4.58e-40	0.126281	1.09148	8.60749	2.68e-05	3.92e-05
SLC7A6OS	-0.261417	0.834268	10.2935	1.13e-45	6.68e-45	0.417627	1.33573	10.2935	1.7e-74	3.53e-73	0.000286904	1.0002	10.2935	0.989874	0.991157
TEKT2	-0.0137454	0.990518	9.22532	0.746489	0.765929	0.417481	1.33559	9.22532	4.72e-15	1.32e-14	-0.351294	0.783881	9.22532	2.9e-12	5.53e-12
GCHFR	-0.663297	0.631434	8.33928	3.2e-64	3.68e-63	0.417384	1.3355	8.33928	3.34e-16	9.81e-16	0.571199	1.48576	8.33928	4.41e-33	1.51e-32
PDP2	-0.184003	0.880257	7.27232	9.76e-14	2.07e-13	0.417328	1.33545	7.27232	3.83e-42	3.02e-41	-0.109381	0.926986	7.27232	0.000223269	0.000311957
CCNK	-0.334276	0.793182	9.03266	7.23e-65	8.48e-64	0.417241	1.33537	9.03266	4.05e-63	6.15e-62	0.104094	1.07482	9.03266	1.91e-05	2.81e-05
BCL11A	-0.176735	0.884703	9.46944	0.00385547	0.00495648	0.416996	1.33514	9.46944	6.35e-08	1.25e-07	-0.119408	0.920566	9.46944	0.101607	0.117892
GINS4	-0.161594	0.894037	6.69921	5.99e-16	1.38e-15	0.416432	1.33462	6.69921	5.51e-65	8.84e-64	-0.140407	0.907263	6.69921	4.3e-09	7.36e-09
MED28	-0.28523	0.820611	8.8917	3.01e-41	1.56e-40	0.416367	1.33456	8.8917	2.31e-55	2.75e-54	0.035223	1.02472	8.8917	0.174295	0.197115
VPS25	-0.268527	0.830167	11.1732	4.27e-35	1.83e-34	0.416204	1.33441	11.1732	4.81e-53	5.32e-52	0.0116473	1.00811	11.1732	0.659842	0.683505
SLC9A3R1	-0.927045	0.525934	10.2216	3.6e-106	1.76e-104	0.416087	1.3343	10.2216	2.58e-13	6.65e-13	0.946892	1.92772	10.2216	1.44e-75	1.22e-74
NKAP	-0.360585	0.778849	9.5013	4.34e-63	4.76e-62	0.41585	1.33408	9.5013	4.61e-52	4.98e-51	0.14269	1.10396	9.5013	7.86e-08	1.29e-07
CACYBP	-0.075068	0.949297	11.2808	0.00143611	0.00190283	0.415616	1.33387	11.2808	1e-46	9.16e-46	-0.262555	0.83361	11.2808	3e-21	7.53e-21
NUCKS1	-0.141215	0.906755	10.6903	1.54e-12	3.11e-12	0.415527	1.33379	10.6903	5.01e-65	8.07e-64	-0.168543	0.889741	10.6903	1.42e-12	2.73e-12
PIGM	-0.0649342	0.955989	9.63687	0.00184934	0.00243033	0.415354	1.33363	9.63687	5.01e-60	6.95e-59	-0.276713	0.82547	9.63687	9.78e-30	3.07e-29
PSMD13	-0.295278	0.814915	11.1814	2.18e-39	1.06e-38	0.415306	1.33358	11.1814	6.71e-49	6.58e-48	0.0504333	1.03558	11.1814	0.0662297	0.0780802
TBL1X	-0.440439	0.73691	9.44252	4.99e-99	1.85e-97	0.415066	1.33336	9.44252	1.05e-52	1.15e-51	0.256785	1.19481	9.44252	7.87e-23	2.06e-22
AKT1S1	-0.247002	0.842646	8.40821	1.05e-24	3.24e-24	0.415049	1.33334	8.40821	2.41e-43	1.97e-42	-0.0178935	0.987674	8.40821	0.538921	0.567329
GTF3C4	-0.11314	0.924574	9.01139	1.93e-08	3.31e-08	0.414746	1.33306	9.01139	5.4e-64	8.43e-63	-0.207718	0.865906	9.01139	3e-18	6.93e-18
SETD3	-0.229265	0.85307	9.34772	3.57e-28	1.21e-27	0.414737	1.33306	9.34772	5.23e-58	6.83e-57	-0.042805	0.970766	9.34772	0.0900299	0.105048
SLC7A14	0.0939248	1.06727	9.612	0.0154057	0.0190463	0.41462	1.33295	9.612	1.34e-17	4.16e-17	-0.501651	0.706298	9.612	2.39e-28	7.23e-28
NUDT22	-0.550924	0.682583	9.51946	5.08e-146	1.23e-143	0.414594	1.33292	9.51946	7.44e-47	6.83e-46	0.414101	1.33247	9.51946	8.39e-53	4.42e-52
PSMD2	-0.223366	0.856564	11.5578	3.85e-21	1.06e-20	0.414293	1.33265	11.5578	6.78e-45	5.83e-44	-0.0507866	0.96541	11.5578	0.0753521	0.0884927
TST	-0.667632	0.629539	8.57815	2.02e-89	5.5e-88	0.414259	1.33261	8.57815	4.89e-21	1.75e-20	0.580131	1.49499	8.57815	7.47e-46	3.4e-45
SLC5A6	-0.117133	0.922018	9.44282	1.23e-06	1.94e-06	0.414209	1.33257	9.44282	6.3e-44	5.27e-43	-0.201571	0.869603	9.44282	2.05e-12	3.93e-12
MRPS30	-0.168445	0.889801	9.1047	1.12e-15	2.55e-15	0.413612	1.33202	9.1047	1.43e-57	1.83e-56	-0.128173	0.914989	9.1047	3.61e-07	5.75e-07
NEDD8	-0.350284	0.78443	13.0222	4.46e-49	2.98e-48	0.413401	1.33182	13.0222	1.23e-42	9.84e-42	0.130237	1.09447	13.0222	7.96e-06	1.19e-05
EXOSC2	0.0262234	1.01834	9.22724	0.263973	0.289545	0.413043	1.33149	9.22724	1.44e-46	1.31e-45	-0.404111	0.755702	9.22724	2.77e-50	1.39e-49
C10orf12	-0.249829	0.840996	8.78426	1.89e-40	9.54e-40	0.412965	1.33142	8.78426	1.73e-70	3.25e-69	-0.0120281	0.991697	8.78426	0.599983	0.626485
GSPT1	-0.246442	0.842973	9.67165	6.82e-33	2.74e-32	0.412947	1.3314	9.67165	2.77e-58	3.65e-57	-0.0168219	0.988408	9.67165	0.502614	0.531718
PPL	-0.330221	0.795415	8.06788	1.61e-12	3.26e-12	0.412641	1.33112	8.06788	2.95e-12	7.25e-12	0.102421	1.07357	8.06788	0.0677918	0.079865
CYP4X1	-0.85667	0.552226	8.30675	5.83e-61	5.92e-60	0.412382	1.33088	8.30675	1.33e-09	2.86e-09	0.850245	1.80281	8.30675	7.95e-42	3.33e-41
PSMB5	-0.190998	0.876	10.6744	2.66e-24	8.08e-24	0.41216	1.33068	10.6744	1.12e-71	2.17e-70	-0.0948573	0.936365	10.6744	2.83e-05	4.13e-05
NUCB2	-0.389299	0.7635	10.1109	2.05e-65	2.46e-64	0.411956	1.33049	10.1109	3.36e-45	2.92e-44	0.186925	1.13834	10.1109	3.06e-11	5.65e-11
NSMCE4A	-0.367403	0.775177	9.67199	9.64e-55	7.94e-54	0.411336	1.32992	9.67199	1.19e-42	9.53e-42	0.156382	1.11449	9.67199	6.74e-08	1.11e-07
ZNF35	-0.0670931	0.954559	8.02961	0.00370676	0.00477379	0.411315	1.3299	8.02961	1.55e-47	1.46e-46	-0.27006	0.829285	8.02961	3.04e-23	8.06e-23
PGRMC1	-0.202996	0.868745	10.7848	1.5e-11	2.93e-11	0.41116	1.32975	10.7848	8.82e-28	4.11e-27	-0.0769308	0.948072	10.7848	0.0328999	0.0398869
NT5DC2	0.308779	1.23866	11.9868	3.12e-19	8.06e-19	0.411047	1.32965	11.9868	3.4e-21	1.23e-20	-0.803585	0.572924	11.9868	7.93e-94	9.29e-93
TCEB2	-0.0843327	0.943221	12.941	1.61e-05	2.39e-05	0.410968	1.32958	12.941	4.29e-67	7.34e-66	-0.24527	0.843658	12.941	1.36e-26	3.92e-26
UBE2N	-0.142454	0.905977	11.5206	1.03e-11	2.02e-11	0.410957	1.32957	11.5206	1.46e-57	1.87e-56	-0.162725	0.893336	11.5206	7.17e-11	1.31e-10
PRLHR	-0.245095	0.84376	7.58075	7.99e-16	1.83e-15	0.410956	1.32957	7.58075	5.38e-27	2.44e-26	-0.0169657	0.988309	7.58075	0.642997	0.667668
TCP11L1	-0.190065	0.876566	8.94835	3.1e-14	6.69e-14	0.410458	1.32911	8.94835	1.02e-39	7.31e-39	-0.0946702	0.936486	8.94835	0.0016191	0.00215341
TXNL4A	-0.243292	0.844816	11.8825	1.55e-27	5.18e-27	0.410158	1.32883	11.8825	6.37e-49	6.26e-48	-0.018818	0.987041	11.8825	0.487774	0.517224
BARD1	-0.258398	0.836016	9.61126	3.61e-12	7.21e-12	0.410148	1.32882	9.61126	1.91e-18	6.17e-18	0.00264294	1.00183	9.61126	0.952751	0.958128
AK7	-0.191293	0.875821	6.68253	1.92e-13	4.04e-13	0.409922	1.32861	6.68253	1.05e-36	6.75e-36	-0.0924509	0.937928	6.68253	0.00304505	0.0039854
ZAR1	0.0432318	1.03042	7.56135	0.189476	0.211293	0.409909	1.3286	7.56135	1.88e-23	7.43e-23	-0.42548	0.744591	7.56135	2.86e-28	8.62e-28
SLC30A3	-0.289092	0.818417	9.29154	1.52e-10	2.85e-10	0.409801	1.3285	9.29154	6.48e-13	1.64e-12	0.0465391	1.03278	9.29154	0.389747	0.419324
SUV420H2	-0.136167	0.909933	8.94483	5.15e-11	9.87e-11	0.409587	1.32831	8.94483	2.1e-58	2.79e-57	-0.170435	0.888575	8.94483	5.15e-12	9.74e-12
CCT3	0.0264724	1.01852	14.2997	0.262053	0.287603	0.409419	1.32815	14.2997	3.11e-45	2.71e-44	-0.401245	0.757204	14.2997	5.29e-49	2.59e-48
FADD	-0.377691	0.769668	10.2859	5.6e-65	6.59e-64	0.4092	1.32795	10.2859	4.03e-47	3.75e-46	0.172889	1.12731	10.2859	2.8e-10	5e-10
AHSA1	-0.159298	0.895461	11.837	6.41e-10	1.18e-09	0.408995	1.32776	11.837	2.23e-37	1.46e-36	-0.137062	0.909369	11.837	8.57e-06	1.28e-05
ZNF138	0.0535125	1.03779	8.79039	0.0336258	0.0404662	0.408919	1.32769	8.79039	1.6e-39	1.14e-38	-0.4392	0.737544	8.79039	1.39e-51	7.13e-51
PDCD2L	-0.0286659	0.980326	10.4579	0.212435	0.235332	0.408799	1.32758	10.4579	1.39e-47	1.32e-46	-0.322394	0.799741	10.4579	3.05e-33	1.05e-32
CSTF3	0.0117607	1.00819	11.0018	0.611114	0.63696	0.408585	1.32738	11.0018	5.76e-47	5.32e-46	-0.379613	0.768644	11.0018	1.28e-45	5.8e-45
TIMM17B	-0.186982	0.878441	8.45428	2e-25	6.3e-25	0.408415	1.32723	8.45428	2.23e-77	4.98e-76	-0.0972338	0.934824	8.45428	7.13e-06	1.07e-05
IL17RB	-0.230049	0.852606	6.18988	6.5e-20	1.72e-19	0.408206	1.32703	6.18988	1.64e-38	1.13e-37	-0.0358896	0.97543	6.18988	0.237232	0.263634
TPRKB	-0.00878924	0.993926	11.5195	0.704169	0.725787	0.407554	1.32643	11.5195	1.2e-46	1.09e-45	-0.349515	0.784848	11.5195	1.55e-38	6.02e-38
CPSF6	-0.0586214	0.960181	9.12683	0.00318052	0.0041162	0.407461	1.32635	9.12683	7.79e-64	1.21e-62	-0.278667	0.824352	9.12683	3.62e-33	1.24e-32
C2orf43	0.107071	1.07704	10.0086	8.5e-05	0.00012164	0.40714	1.32605	10.0086	2.17e-33	1.24e-32	-0.513677	0.700435	10.0086	1.71e-60	1.07e-59
TIMM10	-0.266295	0.831452	11.1162	1.37e-30	5.06e-30	0.407126	1.32604	11.1162	1.03e-44	8.78e-44	0.0165411	1.01153	11.1162	0.556538	0.584759
RRP9	-0.337315	0.791513	9.59855	1.21e-42	6.52e-42	0.40688	1.32582	9.59855	8.92e-39	6.15e-38	0.117612	1.08494	9.59855	9.34e-05	0.000132951
GABRA3	-0.402463	0.756565	7.15493	1.77e-28	6.05e-28	0.406665	1.32562	7.15493	1.52e-18	4.92e-18	0.210319	1.15694	7.15493	1.71e-06	2.64e-06
EPS15L1	-0.0656628	0.955506	8.47253	0.00164879	0.0021764	0.406217	1.32521	8.47253	3.02e-57	3.83e-56	-0.267562	0.830722	8.47253	8.02e-28	2.39e-27
PPP5C	-0.0451649	0.969179	8.76436	0.0366329	0.0439117	0.40618	1.32517	8.76436	2.76e-53	3.08e-52	-0.296639	0.814147	8.76436	7.75e-32	2.57e-31
LRRC4C	-0.195087	0.87352	9.664	0.00128563	0.00170949	0.40618	1.32517	9.664	1.07e-07	2.08e-07	-0.0837382	0.943609	9.664	0.246836	0.27373
ILF3	-0.00892334	0.993834	11.3037	0.654771	0.679042	0.406128	1.32512	11.3037	5.27e-63	7.98e-62	-0.348058	0.785641	11.3037	1.13e-51	5.81e-51
TM7SF2	-0.162228	0.893644	10.7058	4.65e-07	7.47e-07	0.405815	1.32484	10.7058	6.67e-24	2.69e-23	-0.130076	0.913783	10.7058	0.000712954	0.000970406
KHSRP	-0.216851	0.860441	10.5427	2.14e-27	7.13e-27	0.405759	1.32479	10.5427	2.06e-60	2.89e-59	-0.0524587	0.964292	10.5427	0.0303352	0.0368934
PHF19	-0.144478	0.904707	9.96886	2.69e-06	4.17e-06	0.405543	1.32459	9.96886	4.86e-26	2.13e-25	-0.155041	0.898107	9.96886	2.4e-05	3.52e-05
RCOR2	-0.195913	0.87302	11.1093	1.78e-19	4.62e-19	0.405201	1.32427	11.1093	2.36e-51	2.48e-50	-0.0816961	0.944946	11.1093	0.00177179	0.00234974
HN1	0.138342	1.10064	14.2759	1.15e-06	1.82e-06	0.404209	1.32336	14.2759	3.63e-30	1.85e-29	-0.555479	0.680431	14.2759	5.51e-65	3.78e-64
PPIL1	-0.0622748	0.957753	9.31852	0.00152687	0.00201961	0.404132	1.32329	9.31852	3.05e-64	4.79e-63	-0.270522	0.829019	9.31852	5.58e-32	1.86e-31
ELAC1	-0.160348	0.894809	9.28097	4.82e-13	9.95e-13	0.403312	1.32254	9.28097	4.42e-49	4.36e-48	-0.130524	0.9135	9.28097	8.7e-07	1.36e-06
DNAI2	-0.320979	0.800527	6.10719	4.72e-30	1.7e-29	0.403178	1.32242	6.10719	1.15e-29	5.8e-29	0.0977021	1.07007	6.10719	0.0042531	0.00551727
COQ2	-0.294109	0.815576	8.19436	1.19e-44	6.8e-44	0.402677	1.32196	8.19436	1.44e-52	1.58e-51	0.0599899	1.04246	8.19436	0.0195617	0.0241432
CDKN2AIP	-0.120734	0.91972	9.66649	1.18e-08	2.04e-08	0.402674	1.32196	9.66649	3.65e-54	4.2e-53	-0.186212	0.878911	9.66649	1.31e-13	2.62e-13
TOMM40	-0.148973	0.901892	8.32425	4.26e-13	8.82e-13	0.40265	1.32193	8.32425	3.11e-57	3.95e-56	-0.146088	0.903697	8.32425	2.7e-09	4.65e-09
STRA13	-0.0611068	0.958528	13.1903	0.00290416	0.00376906	0.402648	1.32193	13.1903	3.37e-58	4.44e-57	-0.270863	0.828824	13.1903	1.92e-29	5.99e-29
SF3B4	-0.124563	0.917282	7.62195	2.95e-07	4.8e-07	0.402403	1.32171	7.62195	7.08e-41	5.29e-40	-0.180533	0.882377	7.62195	4.2e-10	7.46e-10
ADAT1	-0.0606473	0.958834	8.98051	0.0175326	0.0215951	0.402385	1.32169	8.98051	3.17e-37	2.07e-36	-0.271281	0.828583	8.98051	1.98e-19	4.72e-19
INTS7	0.0756735	1.05385	9.09127	0.00175674	0.0023131	0.4023	1.32161	9.09127	1.97e-41	1.51e-40	-0.464791	0.724576	9.09127	4.51e-63	2.98e-62
PHF8	-0.344928	0.787347	7.65216	4.36e-55	3.63e-54	0.402217	1.32154	7.65216	1.28e-46	1.16e-45	0.132565	1.09624	7.65216	1.03e-06	1.61e-06
C3orf38	-0.177344	0.88433	9.10167	5.37e-19	1.37e-18	0.402058	1.32139	9.10167	1.8e-60	2.54e-59	-0.105274	0.929628	9.10167	1.1e-05	1.63e-05
GOSR2	-0.143339	0.905421	9.36279	3.15e-11	6.08e-11	0.402002	1.32134	9.36279	1.18e-51	1.26e-50	-0.153513	0.899059	9.36279	2.53e-09	4.36e-09
MYOZ3	-0.405393	0.755031	8.09642	6.1e-60	5.98e-59	0.401882	1.32123	8.09642	1.91e-36	1.21e-35	0.218727	1.16371	8.09642	7.52e-13	1.47e-12
PSMB3	-0.203914	0.868192	12.6297	4.3e-21	1.18e-20	0.40182	1.32117	12.6297	1.07e-50	1.11e-49	-0.0673317	0.954402	12.6297	0.00985842	0.012473
ALG3	-0.390902	0.762653	9.94953	6.26e-87	1.58e-85	0.401711	1.32107	9.94953	7.75e-56	9.38e-55	0.198301	1.14735	9.94953	9.55e-16	2.04e-15
CSNK2A2	-0.122312	0.918714	10.8214	7.63e-11	1.45e-10	0.401687	1.32105	10.8214	5.33e-69	9.52e-68	-0.183094	0.880812	10.8214	2.32e-16	5.03e-16
POLR2G	-0.215023	0.861533	13.2403	8.92e-28	3e-27	0.401613	1.32098	13.2403	4.34e-61	6.24e-60	-0.0513726	0.965018	13.2403	0.0312327	0.0379412
LYPD6	0.226012	1.1696	8.5613	2.37e-08	4.05e-08	0.400713	1.32016	8.5613	3.76e-15	1.06e-14	-0.676873	0.62552	8.5613	6.05e-47	2.82e-46
IQCH	-0.212677	0.862935	6.12524	2.06e-12	4.16e-12	0.400706	1.32015	6.12524	4.11e-26	1.81e-25	-0.0538983	0.96333	6.12524	0.137559	0.157445
DSCAM	-0.37983	0.768528	8.34051	9.5e-08	1.58e-07	0.400519	1.31998	8.34051	8.82e-06	1.52e-05	0.183637	1.13574	8.34051	0.0309678	0.0376351
NOL10	-0.0362632	0.975178	7.88515	0.0959359	0.110493	0.40045	1.31992	7.88515	6.11e-51	6.38e-50	-0.30419	0.809897	7.88515	5.83e-33	1.99e-32
PHF6	-0.0521506	0.964498	9.46029	0.00903253	0.0113512	0.400425	1.3199	9.46029	6.49e-61	9.28e-60	-0.281606	0.822674	9.46029	1.53e-33	5.28e-33
SMNDC1	-0.192759	0.874931	11.7168	4.52e-23	1.32e-22	0.400408	1.31988	11.7168	2.06e-62	3.06e-61	-0.0819177	0.944801	11.7168	0.000493496	0.00067727
CCDC40	-0.0341931	0.976578	7.60957	0.148874	0.16799	0.400266	1.31975	7.60957	7.02e-43	5.66e-42	-0.306966	0.80834	7.60957	1.85e-28	5.6e-28
MPST	-0.309501	0.806921	10.3273	3.64e-44	2.05e-43	0.400126	1.31962	10.3273	3.3e-46	2.96e-45	0.0841145	1.06004	10.3273	0.00196227	0.00259552
NXT1	-0.37055	0.773488	11.703	5.02e-87	1.27e-85	0.399964	1.31947	11.703	6.01e-62	8.78e-61	0.170952	1.1258	11.703	2.95e-13	5.82e-13
LYAR	-0.439189	0.737549	9.43578	4e-90	1.13e-88	0.399874	1.31939	9.43578	5.15e-45	4.45e-44	0.268504	1.20456	9.43578	4.71e-23	1.24e-22
RNF212	-0.293613	0.815856	5.77481	9e-20	2.37e-19	0.399669	1.31921	5.77481	9.62e-23	3.71e-22	0.0619585	1.04388	5.77481	0.111171	0.128345
TLK2	-0.0376438	0.974245	9.49686	0.0657708	0.0770218	0.399548	1.31909	9.49686	9.94e-58	1.29e-56	-0.301428	0.811449	9.49686	1.18e-36	4.35e-36
ACTL8	-0.159485	0.895345	6.62265	1.22e-06	1.92e-06	0.399148	1.31873	6.62265	2.91e-22	1.1e-21	-0.12805	0.915067	6.62265	0.00109978	0.00147833
C20orf27	-0.304976	0.809456	8.66343	3.36e-28	1.14e-27	0.39913	1.31871	8.66343	3.64e-30	1.86e-29	0.0785725	1.05597	8.66343	0.0192147	0.023725
BHLHB9	0.069187	1.04913	9.5656	0.008034	0.0101392	0.398855	1.31846	9.5656	5.49e-35	3.32e-34	-0.452519	0.730766	9.5656	6.17e-51	3.14e-50
CDC34	-0.186604	0.878671	11.0434	8.31e-18	2.05e-17	0.398839	1.31845	11.0434	8.56e-50	8.66e-49	-0.0892646	0.940002	11.0434	0.000627392	0.000856866
ZNF92	0.0815884	1.05818	10.989	0.00818804	0.0103269	0.398808	1.31842	10.989	3.35e-25	1.41e-24	-0.470089	0.72192	10.989	3.7e-39	1.44e-38
HSPA4	-0.355663	0.78151	10.8773	2.13e-53	1.66e-52	0.398691	1.31831	10.8773	9.81e-42	7.58e-41	0.150942	1.11029	10.8773	1.05e-07	1.71e-07
ANKRD40	-0.149095	0.901816	9.21629	5.41e-16	1.25e-15	0.398051	1.31773	9.21629	2.79e-70	5.19e-69	-0.141831	0.906368	9.21629	1.16e-10	2.09e-10
SNRPD3	-0.294926	0.815114	12.3717	7.73e-46	4.62e-45	0.398027	1.3177	12.3717	2.11e-52	2.3e-51	0.065281	1.04629	12.3717	0.0102655	0.0129739
YIPF6	-0.146534	0.903418	10.2765	2.46e-13	5.13e-13	0.39796	1.31764	10.2765	4.92e-59	6.66e-58	-0.145386	0.904137	10.2765	1.19e-09	2.08e-09
CCDC89	-0.0181969	0.987466	6.81571	0.533485	0.561693	0.396938	1.31671	6.81571	8.42e-28	3.94e-27	-0.326726	0.797344	6.81571	1.99e-21	5.03e-21
TOP3B	-0.108454	0.927581	8.50848	1.01e-07	1.68e-07	0.39693	1.3167	8.50848	4.9e-57	6.18e-56	-0.198548	0.871427	8.50848	1.93e-16	4.19e-16
NAT14	-0.126588	0.915995	11.4247	2.41e-06	3.76e-06	0.396612	1.31641	11.4247	1.41e-32	7.81e-32	-0.172514	0.887295	11.4247	6.74e-08	1.11e-07
GPT2	-0.067623	0.954209	9.30433	0.00618326	0.00785487	0.396563	1.31637	9.30433	1.28e-38	8.81e-38	-0.256204	0.837288	9.30433	1.45e-18	3.38e-18
PANK1	-0.0269004	0.981527	7.71113	0.246019	0.270906	0.396527	1.31634	7.71113	6.14e-44	5.15e-43	-0.314002	0.804407	7.71113	5.02e-31	1.63e-30
MRPS12	-0.407634	0.753859	10.5005	7.07e-104	3.23e-102	0.396509	1.31632	10.5005	7.65e-59	1.03e-57	0.226683	1.17014	10.5005	1e-21	2.55e-21
DNAJB11	-0.308048	0.807734	11.9438	1.43e-55	1.21e-54	0.396329	1.31615	11.9438	1.28e-57	1.65e-56	0.0854236	1.061	11.9438	0.000409701	0.000564949
NUP35	0.0926514	1.06633	11.1707	6.14e-05	8.86e-05	0.396141	1.31598	11.1707	6.31e-44	5.28e-43	-0.48343	0.715275	11.1707	2.27e-75	1.91e-74
PRAF2	-0.188355	0.877606	11.1419	1.7e-15	3.87e-15	0.395797	1.31567	11.1419	2.85e-41	2.17e-40	-0.0840761	0.943388	11.1419	0.0030898	0.00404215
ZNF84	0.056441	1.0399	10.5305	0.0655433	0.0767632	0.39561	1.3155	10.5305	3.67e-25	1.55e-24	-0.431537	0.741471	10.5305	1.72e-33	5.92e-33
C14orf39	-0.105057	0.929768	5.49881	0.00384868	0.0049494	0.395312	1.31523	5.49881	3.79e-18	1.21e-17	-0.201934	0.869384	5.49881	2.99e-06	4.57e-06
SLC25A18	-0.41249	0.751325	6.32547	1.74e-20	4.69e-20	0.394953	1.3149	6.32547	2.8e-12	6.89e-12	0.234961	1.17687	6.32547	1.12e-05	1.67e-05
PPIH	-0.158392	0.896023	8.91635	4.35e-13	9e-13	0.394949	1.3149	8.91635	2.11e-48	2.03e-47	-0.125873	0.916449	8.91635	1.51e-06	2.33e-06
BYSL	-0.124717	0.917184	10.7802	2.25e-09	4.02e-09	0.394896	1.31485	10.7802	1.39e-53	1.56e-52	-0.173646	0.886599	10.7802	2.58e-12	4.93e-12
WDR77	-0.238639	0.847545	10.0379	6.6e-40	3.26e-39	0.394472	1.31446	10.0379	1.73e-69	3.13e-68	-0.0114928	0.992065	10.0379	0.602312	0.628804
NDUFA7	-0.212043	0.863314	12.4764	1.48e-26	4.82e-26	0.394418	1.31441	12.4764	1.06e-57	1.37e-56	-0.0492126	0.966464	12.4764	0.0408986	0.0491777
POP1	-0.0908618	0.938962	8.34868	2.47e-05	3.64e-05	0.39421	1.31422	8.34868	3.26e-50	3.34e-49	-0.221114	0.857903	8.34868	3.81e-18	8.75e-18
ZNF442	-0.106594	0.928778	7.91726	5.58e-06	8.53e-06	0.394129	1.31415	7.91726	4.13e-42	3.24e-41	-0.198702	0.871334	7.91726	9.64e-13	1.87e-12
ZNF689	-0.101528	0.932045	9.50405	1.47e-06	2.31e-06	0.394032	1.31406	9.50405	2.27e-52	2.48e-51	-0.205809	0.867052	9.50405	1.66e-16	3.62e-16
RAB39B	0.00271449	1.00188	8.98015	0.915758	0.924457	0.394024	1.31405	8.98015	2.14e-35	1.32e-34	-0.353833	0.782502	8.98015	3.65e-32	1.22e-31
NHLRC2	-0.202871	0.86882	7.70239	1.27e-29	4.52e-29	0.393923	1.31396	7.70239	3.93e-71	7.48e-70	-0.0617986	0.958069	7.70239	0.00451285	0.00584245
C17orf62	-0.345523	0.787023	10.5864	1.83e-55	1.55e-54	0.393777	1.31383	10.5864	8.65e-45	7.41e-44	0.140907	1.1026	10.5864	1.96e-07	3.16e-07
GIPC1	-0.392992	0.761548	9.12652	1.16e-74	1.96e-73	0.393486	1.31356	9.12652	8.16e-46	7.24e-45	0.208575	1.15555	9.12652	4.8e-15	1e-14
GNAI3	-0.0221187	0.984785	10.8331	0.339306	0.3671	0.393445	1.31353	10.8331	2.09e-43	1.71e-42	-0.318054	0.802151	10.8331	6.2e-32	2.06e-31
ZNF507	-0.10096	0.932412	8.18608	4.09e-07	6.59e-07	0.393339	1.31343	8.18608	1.36e-58	1.82e-57	-0.206	0.866937	8.18608	2.42e-18	5.59e-18
RPS21	-0.216492	0.860656	14.837	4.85e-24	1.46e-23	0.39332	1.31341	14.837	2.19e-49	2.18e-48	-0.04192	0.971361	14.837	0.105286	0.121892
RNF138	-0.077946	0.947406	9.82206	0.00132391	0.00175879	0.393274	1.31337	9.82206	2.77e-39	1.94e-38	-0.238624	0.847553	9.82206	8.86e-17	1.95e-16
DCLRE1A	0.0421145	1.02962	10.2609	0.0752805	0.0876443	0.393251	1.31335	10.2609	2.13e-41	1.63e-40	-0.409098	0.753094	10.2609	1.21e-50	6.11e-50
POLR1B	-0.0382353	0.973845	8.56613	0.125836	0.143052	0.3931	1.31321	8.56613	3.73e-37	2.43e-36	-0.294861	0.815151	8.56613	9.35e-24	2.51e-23
PKN1	-0.314241	0.804274	9.77726	5.84e-38	2.76e-37	0.39303	1.31315	9.77726	3.86e-37	2.51e-36	0.0971484	1.06966	9.77726	0.00108432	0.0014589
PPM1E	0.187439	1.13874	8.74267	2.12e-14	4.62e-14	0.393002	1.31312	8.74267	6.64e-38	4.44e-37	-0.615247	0.652818	8.74267	2.86e-111	4.7e-110
DNTTIP1	-0.220825	0.858074	11.7515	8.7e-38	4.09e-37	0.392967	1.31309	11.7515	8.56e-77	1.88e-75	-0.0354525	0.975726	11.7515	0.0908164	0.105934
PBRM1	0.0795533	1.05669	9.34541	0.000627675	0.000850136	0.392758	1.3129	9.34541	1.12e-42	9.03e-42	-0.461825	0.726067	9.34541	1.6e-67	1.15e-66
MRPL27	-0.14966	0.901463	12.1695	7.07e-14	1.5e-13	0.392521	1.31269	12.1695	1.83e-57	2.34e-56	-0.136117	0.909965	12.1695	1.24e-08	2.08e-08
ZNF273	0.158263	1.11594	8.90677	2.3e-07	3.75e-07	0.392261	1.31245	8.90677	1.11e-24	4.62e-24	-0.573157	0.672144	8.90677	1.7e-59	1.04e-58
DIO3	-0.50994	0.702252	7.73977	3.3e-23	9.72e-23	0.392154	1.31235	7.73977	2.22e-09	4.75e-09	0.375832	1.29759	7.73977	1.18e-09	2.06e-09
KCNH3	-0.259765	0.835224	8.79013	9.28e-15	2.05e-14	0.39185	1.31207	8.79013	1.71e-20	6.01e-20	0.0208364	1.01455	8.79013	0.605083	0.631469
ZNF620	0.0534756	1.03776	6.97751	0.0114022	0.0142272	0.391842	1.31207	6.97751	9.04e-52	9.67e-51	-0.42398	0.745366	6.97751	3.66e-69	2.69e-68
CDK4	-0.187079	0.878383	10.7341	4.19e-12	8.33e-12	0.391774	1.31201	10.7341	3.13e-31	1.66e-30	-0.0823157	0.94454	10.7341	0.0109653	0.0138296
PAGE1	-0.232543	0.851134	5.52603	9.88e-09	1.72e-08	0.391674	1.31191	5.52603	1.79e-14	4.87e-14	-0.0176649	0.98783	5.52603	0.716063	0.737034
ARL13B	-0.206706	0.866513	9.17871	3.99e-20	1.06e-19	0.391563	1.31181	9.17871	1.9e-44	1.61e-43	-0.0542558	0.963091	9.17871	0.0454497	0.0544184
DUT	-0.00926948	0.993595	12.5833	0.66628	0.689618	0.391181	1.31147	12.5833	6.32e-50	6.42e-49	-0.33429	0.793175	12.5833	6.72e-41	2.74e-40
HINT1	-0.119735	0.920357	14.5572	2.99e-08	5.08e-08	0.390684	1.31101	14.5572	7.93e-49	7.77e-48	-0.17698	0.884553	14.5572	5.54e-12	1.05e-11
DRAP1	-0.351073	0.784001	12.0105	3.69e-64	4.23e-63	0.390588	1.31093	12.0105	3.8e-49	3.77e-48	0.151621	1.11082	12.0105	3.36e-09	5.76e-09
DDX28	-0.370616	0.773452	10.7841	5.06e-64	5.77e-63	0.390333	1.3107	10.7841	7.54e-44	6.29e-43	0.1796	1.13257	10.7841	3.2e-11	5.9e-11
C1GALT1	-0.207551	0.866006	8.22237	1.34e-20	3.63e-20	0.390143	1.31052	8.22237	7.28e-45	6.25e-44	-0.0517945	0.964736	8.22237	0.0541836	0.0644362
CITED1	-0.127524	0.915401	7.08878	7.18e-05	0.000103212	0.390139	1.31052	7.08878	2.58e-22	9.75e-22	-0.165436	0.891659	7.08878	1.53e-05	2.26e-05
CFL1	-0.304449	0.809751	12.5949	1.41e-42	7.58e-42	0.390113	1.3105	12.5949	9.65e-44	8e-43	0.0858334	1.0613	12.5949	0.0016089	0.00214107
FCGR3A	-1.24295	0.422508	8.30695	1.01e-111	5.71e-110	0.389552	1.30999	8.30695	1.95e-07	3.74e-07	1.41907	2.67412	8.30695	2.11e-101	2.88e-100
CRB2	-0.258181	0.836141	6.27918	3.22e-27	1.06e-26	0.389107	1.30958	6.27918	1.68e-38	1.15e-37	0.0210242	1.01468	6.27918	0.467737	0.497457
PEX5L	-0.120394	0.919937	6.64442	1.31e-05	1.96e-05	0.388907	1.3094	6.64442	1.14e-29	5.7e-29	-0.174467	0.886095	6.64442	1.11e-07	1.8e-07
KCNH6	0.0127237	1.00886	8.59627	0.733757	0.753668	0.38869	1.3092	8.59627	1.04e-16	3.15e-16	-0.36331	0.777379	8.59627	1.87e-16	4.06e-16
STX10	-0.324704	0.798462	10.1343	1.66e-68	2.22e-67	0.388562	1.30909	10.1343	5.69e-61	8.14e-60	0.115975	1.08371	10.1343	4.73e-07	7.49e-07
SEH1L	-0.228572	0.85348	10.1595	1.31e-30	4.84e-30	0.38856	1.30909	10.1595	1.17e-55	1.4e-54	-0.0205383	0.985865	10.1595	0.394832	0.424321
DHCR24	-0.190586	0.87625	9.23458	1e-05	1.52e-05	0.388166	1.30873	9.23458	8.95e-13	2.25e-12	-0.0741295	0.949915	9.23458	0.150485	0.171596
CCDC101	-0.0845796	0.943059	8.74398	0.000305699	0.000422241	0.387351	1.30799	8.74398	6.62e-41	4.96e-40	-0.223943	0.856222	8.74398	6.32e-16	1.35e-15
PCSK4	-0.14051	0.907199	9.45108	6.15e-06	9.38e-06	0.387339	1.30798	9.45108	2.06e-23	8.15e-23	-0.144508	0.904688	9.45108	9.65e-05	0.000137248
NANOS1	0.165077	1.12123	10.4242	3.46e-05	5.06e-05	0.387014	1.30768	10.4242	1.12e-14	3.07e-14	-0.578173	0.669811	10.4242	2.21e-35	7.95e-35
CCDC43	-0.026789	0.981603	9.86479	0.182056	0.203292	0.386854	1.30754	9.86479	3.59e-56	4.4e-55	-0.305568	0.809124	9.86479	3.82e-39	1.49e-38
THAP9	-0.0755061	0.949009	6.49896	0.000664858	0.00089955	0.386274	1.30701	6.49896	1.89e-45	1.66e-44	-0.235871	0.849172	6.49896	2.01e-19	4.78e-19
FKBP4	-0.106871	0.9286	9.93896	3.61e-06	5.58e-06	0.386132	1.30688	9.93896	8.06e-42	6.26e-41	-0.191205	0.875874	9.93896	2.9e-12	5.53e-12
TLX2	-0.142446	0.905982	10.7791	6.95e-08	1.16e-07	0.386004	1.30677	10.7791	8.06e-32	4.36e-31	-0.140572	0.907159	10.7791	8.21e-06	1.23e-05
CETN3	-0.0257902	0.982282	9.79129	0.27539	0.301554	0.385898	1.30667	9.79129	5.54e-40	3.99e-39	-0.306137	0.808805	9.79129	2.04e-28	6.17e-28
FAM96A	-0.266324	0.831435	12.2209	3.15e-41	1.63e-40	0.385888	1.30666	12.2209	1.74e-54	2.02e-53	0.0354458	1.02487	12.2209	0.143229	0.163611
ZNF787	-0.293257	0.816058	9.58789	2.26e-37	1.05e-36	0.385612	1.30641	9.58789	1.98e-40	1.45e-39	0.0739375	1.05259	9.58789	0.00822221	0.0104622
STX2	-0.0686333	0.953541	10.4287	0.0179638	0.0221074	0.385119	1.30597	10.4287	1.46e-26	6.53e-26	-0.244605	0.844047	10.4287	1.05e-12	2.03e-12
SLC7A3	-0.0935896	0.937188	6.79736	0.00167969	0.00221542	0.38503	1.30589	6.79736	3.51e-25	1.48e-24	-0.209087	0.865085	6.79736	3.39e-09	5.82e-09
RBM14	-0.113783	0.924162	11.7647	1.54e-08	2.66e-08	0.384703	1.30559	11.7647	8.48e-55	9.96e-54	-0.180119	0.88263	11.7647	4.64e-14	9.4e-14
SRBD1	-0.0927126	0.937758	9.17954	1.17e-05	1.76e-05	0.384687	1.30558	9.17954	1.45e-49	1.45e-48	-0.210027	0.864521	9.17954	4.7e-17	1.04e-16
SEPHS1	-0.0531675	0.963818	10.6287	0.00978284	0.0122582	0.384377	1.3053	10.6287	1.46e-52	1.6e-51	-0.265908	0.831675	10.6287	2.94e-28	8.86e-28
CCT5	0.122555	1.08866	10.343	3.81e-05	5.57e-05	0.384313	1.30524	10.343	4.29e-25	1.8e-24	-0.51539	0.699604	10.343	1.1e-50	5.56e-50
CCDC14	0.146915	1.1072	12.2212	8.92e-07	1.42e-06	0.383682	1.30467	12.2212	9.69e-25	4.03e-24	-0.549422	0.683294	12.2212	3.45e-57	2.01e-56
MRPL49	-0.273548	0.827283	8.46091	2.28e-31	8.61e-31	0.383571	1.30457	8.46091	1.57e-38	1.08e-37	0.0477623	1.03366	8.46091	0.0939954	0.10951
HBB	-0.542358	0.686648	11.4689	4.81e-13	9.94e-13	0.383506	1.30451	11.4689	5.76e-05	9.45e-05	0.429549	1.34681	11.4689	1.71e-06	2.64e-06
DET1	0.0395652	1.0278	10.5435	0.0762671	0.0886861	0.383446	1.30445	10.5435	2.45e-44	2.08e-43	-0.396768	0.759558	10.5435	1.03e-53	5.56e-53
HSPH1	-0.162725	0.893336	13.2169	1.25e-06	1.98e-06	0.383089	1.30413	13.2169	8.86e-20	3.02e-19	-0.109185	0.927112	13.2169	0.00647113	0.00829791
TRMT12	-0.333994	0.793337	9.50704	1.92e-54	1.55e-53	0.382957	1.30401	9.50704	1.58e-44	1.35e-43	0.134146	1.09744	9.50704	3.82e-07	6.08e-07
UBL5	-0.30744	0.808074	13.4076	2.02e-61	2.08e-60	0.382767	1.30384	13.4076	1.86e-59	2.54e-58	0.0966055	1.06925	13.4076	2.63e-05	3.84e-05
CTCF	-0.0639986	0.956609	9.52981	0.000276439	0.000382785	0.382723	1.3038	9.52981	2.96e-72	5.85e-71	-0.249059	0.841445	9.52981	9.86e-34	3.43e-33
TMEM38B	-0.13984	0.90762	8.67331	3.28e-09	5.82e-09	0.38267	1.30375	8.67331	5.78e-39	4.01e-38	-0.141312	0.906694	8.67331	5.43e-07	8.57e-07
MRPS17	-0.156131	0.897428	11.0449	9.32e-11	1.76e-10	0.382309	1.30343	11.0449	2.6e-37	1.7e-36	-0.117856	0.921556	11.0449	4.35e-05	6.28e-05
USP38	-0.100777	0.93253	8.06436	1.8e-05	2.67e-05	0.382234	1.30336	8.06436	1.65e-39	1.18e-38	-0.196395	0.872729	8.06436	1.86e-12	3.57e-12
TUBD1	-0.105618	0.929407	8.62346	4.38e-06	6.72e-06	0.381832	1.303	8.62346	3.75e-41	2.83e-40	-0.189165	0.877113	8.62346	4.22e-12	8e-12
VKORC1L1	-0.0578482	0.960696	9.842	0.00705062	0.00892831	0.381789	1.30296	9.842	1.65e-47	1.55e-46	-0.256963	0.836848	9.842	2.32e-24	6.33e-24
ZNF660	0.129048	1.09357	7.99099	5.55e-07	8.88e-07	0.381739	1.30291	7.99099	1.04e-32	5.8e-32	-0.522324	0.69625	7.99099	2.9e-70	2.19e-69
NUP50	-0.191685	0.875582	10.417	1.11e-17	2.73e-17	0.381636	1.30282	10.417	9.6e-43	7.72e-42	-0.0667693	0.954774	10.417	0.0131947	0.0165066
ZNF219	-0.316053	0.803265	11.2788	6.04e-47	3.79e-46	0.381305	1.30252	11.2788	1.15e-42	9.2e-42	0.110135	1.07933	11.2788	4.23e-05	6.12e-05
ZNF8	-0.0674826	0.954302	8.16088	0.000235273	0.000327387	0.381299	1.30251	8.16088	1.39e-65	2.28e-64	-0.242846	0.845076	8.16088	1.47e-29	4.58e-29
C17orf75	0.214922	1.16064	10.7388	3.23e-14	6.97e-14	0.381069	1.30231	10.7388	7.38e-27	3.33e-26	-0.643675	0.64008	10.7388	3.31e-89	3.56e-88
C9orf37	-0.145269	0.904211	8.87448	1.25e-12	2.54e-12	0.380895	1.30215	8.87448	1.57e-51	1.67e-50	-0.132026	0.912549	8.87448	6.73e-08	1.11e-07
SLC6A3	-0.190635	0.87622	5.59215	4.06e-08	6.86e-08	0.380712	1.30198	5.59215	2.64e-18	8.45e-18	-0.0674401	0.95433	5.59215	0.104613	0.121173
SLC25A14	-0.0800641	0.946016	11.1731	0.000260169	0.000360947	0.380664	1.30194	11.1731	3.63e-45	3.15e-44	-0.224416	0.855942	11.1731	4.43e-18	1.02e-17
GNG4	0.226668	1.17013	12.2826	2.03e-08	3.48e-08	0.380566	1.30185	12.2826	7.72e-14	2.04e-13	-0.659908	0.632919	12.2826	9.5e-45	4.22e-44
ARFIP2	-0.275884	0.825944	10.5994	5.26e-42	2.79e-41	0.380135	1.30146	10.5994	4.71e-50	4.81e-49	0.0541327	1.03823	10.5994	0.0293301	0.0357161
MRPS16	-0.313122	0.804898	10.3271	4.22e-55	3.51e-54	0.380118	1.30145	10.3271	1.2e-50	1.25e-49	0.107028	1.07701	10.3271	1.41e-05	2.09e-05
PRDX5	-0.309	0.807201	13.3201	3.41e-34	1.43e-33	0.379733	1.3011	13.3201	2.57e-32	1.42e-31	0.101515	1.0729	13.3201	0.00098307	0.00132668
ZNF569	0.0459159	1.03234	7.79463	0.0499944	0.0592223	0.379725	1.30109	7.79463	2.09e-39	1.48e-38	-0.402482	0.756556	7.79463	4.81e-50	2.4e-49
PAPOLA	-0.236848	0.848597	10.2567	8.38e-33	3.35e-32	0.379268	1.30068	10.2567	6.96e-53	7.67e-52	-0.00053116	0.999632	10.2567	0.982453	0.984493
ETNK2	-0.141924	0.90631	7.66954	3.38e-05	4.94e-05	0.378924	1.30037	7.66954	1.03e-18	3.35e-18	-0.135025	0.910654	7.66954	0.000941807	0.00127292
SNX5	-0.452967	0.730539	9.89302	1.61e-101	6.53e-100	0.378857	1.30031	9.89302	3.11e-42	2.46e-41	0.306737	1.23691	9.89302	3.45e-31	1.12e-30
EML1	-0.167359	0.890471	10.5394	1.86e-10	3.48e-10	0.378835	1.30029	10.5394	6.47e-31	3.38e-30	-0.0988257	0.933793	10.5394	0.00166848	0.00221704
NOVA1	-0.00453434	0.996862	8.2457	0.840547	0.85449	0.378701	1.30017	8.2457	2.02e-42	1.61e-41	-0.329929	0.795575	8.2457	3.19e-36	1.16e-35
ZNF408	-0.178058	0.883892	7.08724	1.14e-17	2.8e-17	0.378591	1.30007	7.08724	7.66e-49	7.51e-48	-0.0834164	0.94382	7.08724	0.000854189	0.00115761
TAF6L	-0.230548	0.852311	7.50234	3.29e-31	1.24e-30	0.378531	1.30002	7.50234	7.38e-53	8.13e-52	-0.00882371	0.993903	7.50234	0.714373	0.735584
EIF2AK1	-0.143982	0.905018	10.1238	5.55e-11	1.06e-10	0.378489	1.29998	10.1238	4.34e-44	3.65e-43	-0.131716	0.912745	10.1238	5.18e-07	8.18e-07
MACROD1	-0.166165	0.891208	7.61207	1.58e-16	3.72e-16	0.377818	1.29937	7.61207	4.47e-52	4.83e-51	-0.0996178	0.93328	7.61207	3.79e-05	5.49e-05
C5	-0.269368	0.829683	8.47347	1.76e-12	3.56e-12	0.377585	1.29916	8.47347	4.84e-15	1.36e-14	0.0471436	1.03322	8.47347	0.303721	0.332008
L2HGDH	-0.0563	0.961727	8.03142	0.00899179	0.0113024	0.377499	1.29909	8.03142	4.55e-46	4.06e-45	-0.255351	0.837783	8.03142	6.78e-24	1.83e-23
FAM50A	-0.263429	0.833106	11.7531	7.36e-38	3.46e-37	0.377174	1.2988	11.7531	1.04e-48	1.01e-47	0.0390746	1.02745	11.7531	0.117848	0.13573
AATF	-0.262911	0.833404	11.1966	1.62e-29	5.73e-29	0.377154	1.29878	11.1966	6.67e-38	4.46e-37	0.0383582	1.02694	11.1966	0.174942	0.19779
CRY1	-0.122789	0.91841	8.83489	5.88e-07	9.4e-07	0.37688	1.29853	8.83489	4.87e-35	2.95e-34	-0.160382	0.894788	8.83489	4.27e-08	7.06e-08
MCCC1	-0.209366	0.864917	11.6781	1.03e-16	2.44e-16	0.376748	1.29841	11.6781	7.35e-33	4.13e-32	-0.0373204	0.974463	11.6781	0.218795	0.244364
TCF3	-0.560965	0.677849	10.6439	9.33e-93	2.89e-91	0.37673	1.2984	10.6439	2.89e-25	1.23e-24	0.461991	1.37744	10.6439	1.59e-42	6.77e-42
APEX2	-0.405676	0.754882	9.60804	3.86e-103	1.69e-101	0.376713	1.29838	9.60804	4.48e-53	4.97e-52	0.241485	1.18221	9.60804	1.34e-24	3.67e-24
RBM42	-0.300029	0.812236	11.1688	9.54e-51	6.73e-50	0.376645	1.29832	11.1688	5.34e-50	5.44e-49	0.0915193	1.06549	11.1688	0.000198422	0.000278213
MGAT5B	-0.0430078	0.970629	8.41083	0.0786719	0.0913906	0.376642	1.29832	8.41083	1.43e-35	8.83e-35	-0.273466	0.82733	8.41083	2.06e-21	5.2e-21
POLR2I	-0.141461	0.906601	11.9463	5.14e-11	9.85e-11	0.376316	1.29802	11.9463	2.5e-45	2.19e-44	-0.133366	0.911702	11.9463	2.18e-07	3.5e-07
SETD8	-0.142272	0.906091	7.87687	5.19e-14	1.11e-13	0.375973	1.29771	7.87687	5e-59	6.76e-58	-0.131909	0.912623	7.87687	5.31e-09	9.06e-09
G3BP1	-0.285994	0.820176	11.8709	5.37e-31	2.01e-30	0.37588	1.29763	11.8709	1.87e-33	1.07e-32	0.0722681	1.05137	11.8709	0.0159507	0.019828
AIP	-0.360908	0.778674	11.6794	2.06e-65	2.47e-64	0.37573	1.2975	11.6794	1.01e-43	8.38e-43	0.178785	1.13193	11.6794	7.04e-12	1.33e-11
TAF7	-0.0815732	0.945027	12.6198	0.000227124	0.000316465	0.375687	1.29746	12.6198	3.73e-43	3.04e-42	-0.217851	0.859845	12.6198	8.13e-17	1.79e-16
CLDN3	-0.315639	0.803495	7.97173	3.34e-20	8.91e-20	0.375143	1.29697	7.97173	5.52e-18	1.75e-17	0.115021	1.08299	7.97173	0.00535997	0.00690713
PSMA7	-0.242038	0.84555	10.4406	6.44e-50	4.41e-49	0.374797	1.29666	10.4406	1.77e-76	3.83e-75	0.0108093	1.00752	10.4406	0.589628	0.616618
SLC30A6	-0.125046	0.916975	7.13057	3.01e-10	5.58e-10	0.37477	1.29663	7.13057	3.33e-53	3.72e-52	-0.155303	0.897944	7.13057	5.11e-11	9.38e-11
ISOC1	-0.214178	0.862037	10.4379	1.93e-16	4.53e-16	0.374702	1.29657	10.4379	1.52e-30	7.84e-30	-0.0286693	0.980324	10.4379	0.360091	0.389552
ZNF467	-0.314555	0.804099	7.74747	1.26e-27	4.23e-27	0.374612	1.29649	7.74747	1.34e-24	5.54e-24	0.113953	1.08219	7.74747	0.00111409	0.00149687
SAR1B	-0.32582	0.797845	10.0826	3.6e-61	3.67e-60	0.374474	1.29637	10.0826	3.72e-50	3.81e-49	0.130073	1.09435	10.0826	9.36e-08	1.53e-07
PSMA3	-0.353393	0.782741	11.4717	6.69e-68	8.79e-67	0.374333	1.29624	11.4717	6.04e-47	5.57e-46	0.169354	1.12455	11.4717	1.48e-11	2.77e-11
FCHO1	-0.215287	0.861375	8.87553	3.15e-14	6.8e-14	0.374291	1.2962	8.87553	7.09e-26	3.08e-25	-0.0267295	0.981643	8.87553	0.432739	0.462144
SMARCC1	0.00075791	1.00053	10.5852	0.975312	0.976914	0.374168	1.29609	10.5852	4.8e-35	2.91e-34	-0.333418	0.793654	10.5852	2.29e-31	7.49e-31
VEGFB	-0.327803	0.796749	11.3497	2.82e-47	1.79e-46	0.374129	1.29606	11.3497	2.05e-38	1.4e-37	0.133195	1.09672	11.3497	1.63e-06	2.52e-06
NCBP1	-0.035253	0.975861	8.65308	0.0851074	0.0985109	0.373948	1.29589	8.65308	3.01e-50	3.09e-49	-0.282085	0.822402	8.65308	4.37e-32	1.46e-31
CDK2AP2	-0.512399	0.701056	9.31114	5.18e-119	3.87e-117	0.37382	1.29578	9.31114	6.41e-37	4.14e-36	0.395608	1.3155	9.31114	1.14e-46	5.28e-46
PPP1R14C	-0.629924	0.64621	6.43823	1.12e-19	2.94e-19	0.373752	1.29572	6.43823	2.45e-05	4.11e-05	0.562563	1.47689	6.43823	1.32e-11	2.47e-11
PRDX2	0.0374407	1.02629	11.4481	0.0903319	0.104298	0.373726	1.2957	11.4481	6.54e-43	5.28e-42	-0.385118	0.765716	11.4481	1.64e-51	8.41e-51
MEA1	-0.0984548	0.934033	12.6265	1.92e-07	3.14e-07	0.37368	1.29565	12.6265	9.2e-59	1.23e-57	-0.192097	0.875333	12.6265	9.22e-18	2.09e-17
DDX50	-0.132394	0.912317	9.61283	6.14e-12	1.21e-11	0.373607	1.29559	9.61283	3.27e-56	4.02e-55	-0.143836	0.905109	9.61283	3.81e-10	6.77e-10
TMEM138	-0.385273	0.765634	9.72699	1.5e-70	2.16e-69	0.373601	1.29558	9.72699	1.08e-40	8.01e-40	0.215275	1.16093	9.72699	9.4e-16	2e-15
DLEU7	0.160149	1.1174	8.50027	0.00227266	0.00296628	0.373469	1.29546	8.50027	1.63e-08	3.31e-08	-0.559143	0.678705	8.50027	1.62e-19	3.86e-19
MTX1	-0.256808	0.836938	10.3785	1.52e-41	7.93e-41	0.373327	1.29534	10.3785	2.7e-55	3.2e-54	0.0330895	1.0232	10.3785	0.154863	0.176327
ALKBH6	-0.285209	0.820623	8.40963	4.17e-36	1.84e-35	0.373245	1.29526	8.40963	1.12e-38	7.7e-38	0.0734935	1.05226	8.40963	0.00793328	0.0101013
KPTN	-0.0254094	0.982542	9.63021	0.32078	0.348261	0.373186	1.29521	9.63021	6.05e-32	3.29e-31	-0.295387	0.814854	9.63021	9.2e-23	2.41e-22
RBM15	0.00158143	1.0011	9.24217	0.95131	0.956513	0.372423	1.29453	9.24217	4.36e-31	2.3e-30	-0.333038	0.793863	9.24217	4.74e-28	1.42e-27
VEZF1	0.0859957	1.06142	12.2497	0.000519809	0.000707264	0.372367	1.29447	12.2497	8.58e-34	5e-33	-0.452862	0.730592	12.2497	9.85e-57	5.7e-56
PAQR3	-0.0257348	0.98232	8.67566	0.244002	0.268862	0.372101	1.29424	8.67566	1.28e-42	1.02e-41	-0.293961	0.81566	8.67566	5.52e-30	1.74e-29
FTSJ1	-0.249354	0.841273	8.99573	9.23e-46	5.49e-45	0.371902	1.29406	8.99573	1.8e-64	2.85e-63	0.0237701	1.01661	8.99573	0.269755	0.297664
SPTBN2	0.0175738	1.01226	9.89582	0.537124	0.56518	0.371864	1.29402	9.89582	9.3e-26	4.01e-25	-0.355252	0.781733	9.89582	1.91e-26	5.49e-26
CLPP	-0.249398	0.841247	12.8197	2.15e-45	1.26e-44	0.371788	1.29396	12.8197	7.2e-64	1.12e-62	0.0239335	1.01673	12.8197	0.268449	0.296336
COMMD9	-0.151485	0.900323	10.729	9.11e-11	1.72e-10	0.371491	1.29369	10.729	1.84e-37	1.2e-36	-0.114845	0.923482	10.729	3.99e-05	5.77e-05
SLC19A2	-0.324951	0.798325	9.90551	4.29e-27	1.41e-26	0.371399	1.29361	9.90551	2.65e-22	1e-21	0.131571	1.09549	9.90551	0.000307814	0.000427405
PNLDC1	-0.274846	0.826538	6.39034	6.13e-10	1.12e-09	0.371097	1.29334	6.39034	3.8e-11	8.87e-11	0.0606857	1.04296	6.39034	0.254168	0.281348
DLX4	-0.389634	0.763323	6.31154	9.24e-38	4.33e-37	0.371045	1.29329	6.31154	1.04e-21	3.86e-21	0.223739	1.16776	6.31154	1.23e-09	2.14e-09
NFYB	-0.0891865	0.940053	10.284	5.71e-05	8.25e-05	0.370965	1.29322	10.284	6.72e-42	5.22e-41	-0.202847	0.868835	10.284	1.08e-14	2.22e-14
PRR7	-0.165116	0.891857	10.9494	1.06e-06	1.68e-06	0.370881	1.29314	10.9494	2.44e-18	7.82e-18	-0.0949469	0.936307	10.9494	0.0188395	0.023279
POPDC3	-0.266047	0.831595	7.81827	9.1e-06	1.37e-05	0.370639	1.29293	7.81827	9.97e-07	1.83e-06	0.0485979	1.03426	7.81827	0.497545	0.526788
C11orf70	-0.386587	0.764937	6.48797	5.94e-46	3.57e-45	0.370483	1.29279	6.48797	1.76e-26	7.84e-26	0.219911	1.16466	6.48797	3.12e-11	5.77e-11
FAIM	0.0510231	1.036	10.9714	0.034798	0.0418377	0.370342	1.29266	10.9714	3.42e-35	2.09e-34	-0.4014	0.757123	10.9714	1.17e-46	5.43e-46
SORCS1	-0.171155	0.888131	10.4452	0.00338114	0.00436559	0.37013	1.29247	10.4452	5.05e-07	9.42e-07	-0.0857037	0.942325	10.4452	0.218584	0.244152
CA1	-0.20244	0.86908	7.29551	1.03e-05	1.55e-05	0.369739	1.29212	7.29551	1.63e-10	3.7e-10	-0.04093	0.972028	7.29551	0.455363	0.485097
RAB8A	-0.406964	0.754209	8.67935	4.05e-68	5.36e-67	0.369728	1.29211	8.67935	1.48e-34	8.83e-34	0.249519	1.18881	8.67935	3.76e-18	8.64e-18
NDUFV1	-0.271465	0.828478	12.2048	3.5e-49	2.34e-48	0.369633	1.29202	12.2048	2.48e-57	3.15e-56	0.057185	1.04043	12.2048	0.0114668	0.0144354
MSI1	-0.135921	0.910088	7.89715	6.28e-10	1.15e-09	0.369494	1.2919	7.89715	5.64e-42	4.4e-41	-0.135173	0.910561	7.89715	2.58e-07	4.14e-07
UXT	-0.336396	0.792017	10.5672	3.27e-64	3.75e-63	0.369373	1.29179	10.5672	7.05e-48	6.71e-47	0.149622	1.10928	10.5672	1.1e-09	1.92e-09
AFF2	-0.252914	0.8392	6.52468	8.31e-07	1.32e-06	0.368724	1.29121	6.52468	1.28e-08	2.63e-08	0.0316485	1.02218	6.52468	0.606064	0.632436
ZNF230	-0.134099	0.911239	7.57635	7.22e-11	1.37e-10	0.368686	1.29118	7.57635	9.84e-48	9.33e-47	-0.137044	0.909381	7.57635	2.42e-08	4.03e-08
SEC61A1	-0.356648	0.780977	10.9302	2.35e-63	2.62e-62	0.368038	1.2906	10.9302	1.19e-41	9.16e-41	0.179567	1.13254	10.9302	6.67e-12	1.26e-11
ZNF670	0.0236305	1.01651	8.78941	0.318904	0.346322	0.367892	1.29047	8.78941	3.88e-36	2.45e-35	-0.360325	0.778989	8.78941	4.92e-39	1.92e-38
RBM8A	0.0253138	1.0177	10.9317	0.190524	0.212401	0.367866	1.29044	10.9317	1.1e-54	1.29e-53	-0.362692	0.777712	10.9317	4.41e-60	2.74e-59
PSMD7	-0.19482	0.873682	13.73	1.13e-21	3.16e-21	0.367849	1.29043	13.73	8.08e-48	7.68e-47	-0.0500713	0.965889	13.73	0.0416642	0.0500723
TTC5	-0.0517181	0.964787	10.2506	0.0350526	0.0421395	0.367819	1.2904	10.2506	1.05e-33	6.08e-33	-0.25326	0.838999	10.2506	2.09e-18	4.83e-18
DOT1L	-0.189734	0.876768	8.44943	1.65e-16	3.89e-16	0.367655	1.29025	8.44943	1.43e-37	9.42e-37	-0.0571226	0.961179	8.44943	0.0390239	0.0469966
FBXO46	-0.374812	0.771206	10.1063	5.34e-62	5.64e-61	0.367364	1.28999	10.1063	8.67e-37	5.57e-36	0.205961	1.15345	10.1063	1.14e-13	2.27e-13
MRPS18C	-0.307959	0.807784	10.6954	1.45e-52	1.1e-51	0.367316	1.28995	10.6954	1.27e-46	1.16e-45	0.111066	1.08003	10.6954	7.49e-06	1.12e-05
MRPL42	-0.0818752	0.944829	10.8116	9.56e-05	0.000136426	0.367146	1.2898	10.8116	7.65e-46	6.8e-45	-0.209837	0.864635	10.8116	2.68e-17	5.98e-17
UBTF	-0.0743331	0.949781	9.84523	9.53e-05	0.000136077	0.366946	1.28962	9.84523	6.69e-56	8.13e-55	-0.220369	0.858346	9.84523	9.01e-23	2.36e-22
PGAM2	0.284782	1.21823	9.52941	7.67e-07	1.22e-06	0.366549	1.28926	9.52941	4.83e-07	9.04e-07	-0.729984	0.602911	9.52941	4.48e-27	1.31e-26
RBBP5	-0.104882	0.929881	7.48486	2.88e-08	4.91e-08	0.366531	1.28925	7.48486	2.11e-56	2.61e-55	-0.17662	0.884774	7.48486	3.38e-15	7.09e-15
CHCHD1	-0.161306	0.894215	11.7945	4.81e-15	1.07e-14	0.366343	1.28908	11.7945	8.97e-47	8.21e-46	-0.0963262	0.935412	11.7945	9.68e-05	0.000137571
SETBP1	0.0148567	1.01035	12.3124	0.633721	0.658878	0.366239	1.28899	12.3124	5.01e-21	1.8e-20	-0.346397	0.786546	12.3124	3.59e-21	9e-21
DPH3	-0.24747	0.842373	9.93159	2.04e-27	6.78e-27	0.366067	1.28883	9.93159	2.3e-37	1.5e-36	0.026277	1.01838	9.93159	0.341873	0.371127
TMUB1	-0.283205	0.821764	10.5312	9.9e-47	6.16e-46	0.365597	1.28841	10.5312	9.29e-49	9.07e-48	0.0774407	1.05514	10.5312	0.00136165	0.00181851
ATP5H	-0.163084	0.893114	14.1152	3.93e-17	9.47e-17	0.365523	1.28835	14.1152	1.28e-52	1.4e-51	-0.0930729	0.937524	14.1152	6.38e-05	9.15e-05
HSD17B1	-0.18683	0.878534	9.30182	1.26e-15	2.86e-15	0.365491	1.28832	9.30182	4.39e-36	2.76e-35	-0.0593238	0.959714	9.30182	0.0345925	0.0418514
GRK5	-0.203755	0.868288	10.3311	3.07e-13	6.38e-13	0.364709	1.28762	10.3311	2.38e-25	1.01e-24	-0.0345953	0.976306	10.3311	0.302487	0.330757
HSD17B11	-0.104471	0.930146	12.1084	0.000788275	0.00106231	0.364662	1.28758	12.1084	7.27e-21	2.59e-20	-0.175543	0.885434	12.1084	2.12e-06	3.27e-06
TRAF7	-0.159764	0.895172	9.35276	2.6e-19	6.72e-19	0.364294	1.28725	9.35276	2.4e-62	3.54e-61	-0.0966968	0.935172	9.35276	6.08e-06	9.14e-06
CYP27B1	-0.164762	0.892075	7.36982	3.01e-09	5.36e-09	0.364087	1.28707	7.36982	1.1e-25	4.72e-25	-0.0894146	0.939904	7.36982	0.0071413	0.00912595
NDUFAB1	-0.14793	0.902545	12.292	1.54e-14	3.38e-14	0.363889	1.28689	12.292	4.84e-53	5.35e-52	-0.113141	0.924573	12.292	9.25e-07	1.45e-06
C19orf43	-0.226162	0.854906	11.1788	7.11e-30	2.55e-29	0.36387	1.28687	11.1788	2.01e-48	1.94e-47	-0.00203062	0.998593	11.1788	0.93308	0.939981
ACBD6	-0.0426378	0.970878	11.9419	0.0425981	0.0507627	0.363753	1.28677	11.9419	6.07e-45	5.23e-44	-0.262543	0.833617	11.9419	1.87e-26	5.38e-26
ZNF581	-0.153062	0.899339	8.66715	3.78e-11	7.28e-11	0.363332	1.28639	8.66715	1.61e-36	1.03e-35	-0.105358	0.929574	8.66715	0.000142747	0.000201492
ARL6IP1	0.0192324	1.01342	12.6439	0.4177	0.446495	0.36278	1.2859	12.6439	4.44e-35	2.7e-34	-0.349539	0.784835	12.6439	1.16e-36	4.28e-36
NAP1L1	-0.116008	0.922737	10.5812	1.39e-08	2.4e-08	0.362629	1.28577	10.5812	6.4e-47	5.89e-46	-0.157354	0.896668	10.5812	9.9e-11	1.8e-10
CNIH2	-0.167338	0.890484	8.58086	6.81e-10	1.25e-09	0.362415	1.28558	8.58086	1.19e-26	5.35e-26	-0.0842711	0.943261	8.58086	0.00943527	0.0119572
MFAP3	-0.060374	0.959016	7.54633	0.0122744	0.0152909	0.361897	1.28511	7.54633	8.91e-34	5.18e-33	-0.235708	0.849268	7.54633	1.25e-16	2.73e-16
FSD1	0.206125	1.15359	10.5821	1.95e-14	4.26e-14	0.361782	1.28501	10.5821	9.13e-27	4.11e-26	-0.614051	0.653359	10.5821	8.32e-90	9.03e-89
COLEC12	-1.21149	0.431821	8.16884	2.5e-137	3.97e-135	0.361267	1.28455	8.16884	6.23e-08	1.23e-07	1.39952	2.63814	8.16884	1.21e-127	2.75e-126
ACAA2	-0.156858	0.896976	9.90512	2.03e-08	3.48e-08	0.361178	1.28447	9.90512	5.36e-25	2.25e-24	-0.0980543	0.934292	9.90512	0.00335794	0.00438105
NANP	-0.130074	0.913785	7.00889	2.34e-14	5.09e-14	0.361137	1.28444	7.00889	2.18e-67	3.76e-66	-0.136054	0.910005	7.00889	2.32e-11	4.3e-11
CNGB1	-0.0958959	0.935691	7.79301	0.000131988	0.000186669	0.360804	1.28414	7.79301	5.71e-31	2.99e-30	-0.184293	0.88008	7.79301	6.16e-10	1.09e-09
MID1IP1	-0.371851	0.77279	9.13259	6.24e-37	2.84e-36	0.360442	1.28382	9.13259	5.54e-22	2.07e-21	0.207903	1.15501	9.13259	4.94e-09	8.44e-09
ZNF664	0.0227664	1.01591	10.2375	0.287555	0.314103	0.360358	1.28374	10.2375	1.46e-42	1.17e-41	-0.352405	0.783277	10.2375	6.94e-46	3.16e-45
PPP6C	-0.162091	0.893729	9.5305	1.33e-13	2.81e-13	0.360345	1.28373	9.5305	4.93e-40	3.57e-39	-0.089884	0.939598	9.5305	0.0006179	0.000844301
FBXW9	-0.144728	0.90455	8.73703	1.16e-10	2.19e-10	0.36018	1.28359	8.73703	3.79e-38	2.56e-37	-0.114394	0.92377	8.73703	2.05e-05	3.01e-05
NDUFA3	-0.315033	0.803833	11.7342	2.56e-29	9.02e-29	0.360072	1.28349	11.7342	4.22e-24	1.71e-23	0.127545	1.09243	11.7342	0.000171336	0.000240906
DENR	-0.0656285	0.955529	10.3787	0.00251968	0.00327889	0.360065	1.28348	10.3787	3.77e-41	2.84e-40	-0.226618	0.854636	10.3787	9.43e-19	2.21e-18
PDCL	-0.108756	0.927387	10.0249	5.33e-09	9.4e-09	0.359825	1.28327	10.0249	7.23e-56	8.78e-55	-0.165161	0.891829	10.0249	8.58e-14	1.72e-13
PRKAB1	-0.0440142	0.969952	10.2781	0.0472331	0.0560727	0.35982	1.28327	10.2781	1.84e-39	1.3e-38	-0.257095	0.836771	10.2781	6.33e-23	1.66e-22
TMEM74	-0.0316239	0.978318	6.6849	0.39673	0.425138	0.359808	1.28325	6.6849	1.47e-14	4.01e-14	-0.274679	0.826634	6.6849	5.26e-10	9.3e-10
ZNF649	0.00790938	1.0055	8.0565	0.786625	0.80419	0.359657	1.28312	8.0565	5.46e-23	2.12e-22	-0.330685	0.795159	8.0565	6.24e-22	1.6e-21
PRMT6	0.113146	1.08158	10.9192	2.15e-06	3.36e-06	0.359308	1.28281	10.9192	8.74e-34	5.08e-33	-0.479819	0.717068	10.9192	4.48e-69	3.29e-68
API5	-0.125016	0.916994	9.81573	6.56e-10	1.2e-09	0.359227	1.28274	9.81573	6.95e-47	6.38e-46	-0.141541	0.90655	9.81573	4.49e-09	7.67e-09
SERTAD4	0.338948	1.26483	9.737	6.2e-25	1.93e-24	0.359101	1.28263	9.737	7.95e-18	2.5e-17	-0.800289	0.574234	9.737	2.24e-102	3.12e-101
ACTN3	-0.26993	0.82936	7.23668	1.13e-26	3.68e-26	0.358585	1.28217	7.23668	2.28e-29	1.13e-28	0.064818	1.04595	7.23668	0.0339705	0.0411375
NIPA2	-0.179401	0.88307	9.15464	9.04e-17	2.15e-16	0.358362	1.28197	9.15464	1.26e-40	9.31e-40	-0.0635418	0.956912	9.15464	0.0143061	0.017843
MRPL4	-0.256143	0.837323	9.79857	3.8e-48	2.47e-47	0.357743	1.28142	9.79857	3.67e-59	4.98e-58	0.0459879	1.03239	9.79857	0.0330144	0.0400131
SLC25A16	-0.252515	0.839432	7.91175	5.25e-36	2.31e-35	0.357468	1.28118	7.91175	3.27e-45	2.85e-44	0.0410791	1.02888	7.91175	0.0943843	0.109919
OTUB2	0.01692	1.0118	7.22729	0.452148	0.480965	0.357365	1.28108	7.22729	7.55e-38	5.02e-37	-0.341445	0.78925	7.22729	6.63e-39	2.58e-38
ABHD13	-0.0841313	0.943352	7.6298	0.000237993	0.000331052	0.357361	1.28108	7.6298	1.96e-36	1.24e-35	-0.197942	0.871793	7.6298	2.93e-13	5.79e-13
U2AF1	-0.202868	0.868822	13.6247	3.77e-18	9.43e-18	0.357258	1.28099	13.6247	2.27e-34	1.35e-33	-0.0292356	0.979939	13.6247	0.29874	0.326968
DOC2A	0.1811	1.13375	8.21611	8.67e-11	1.64e-10	0.357038	1.28079	8.21611	1.83e-24	7.56e-24	-0.574301	0.671612	8.21611	3.2e-72	2.51e-71
CHST14	-0.359762	0.779293	9.41351	5.08e-69	6.89e-68	0.356986	1.28075	9.41351	9.39e-42	7.27e-41	0.193806	1.14378	9.41351	1.86e-14	3.8e-14
CCDC59	-0.259398	0.835436	10.6222	8.99e-42	4.72e-41	0.356728	1.28052	10.6222	1.42e-49	1.42e-48	0.0515109	1.03635	10.6222	0.0278608	0.0340054
POLR2B	-0.017748	0.987773	11.68	0.425816	0.454458	0.356725	1.28052	11.68	1.86e-38	1.26e-37	-0.291645	0.81697	11.68	5.08e-29	1.56e-28
ASNA1	-0.274517	0.826727	10.4121	2.86e-40	1.44e-39	0.356696	1.28049	10.4121	1.5e-42	1.2e-41	0.07301	1.05191	10.4121	0.0038036	0.00494635
ZNF416	-0.0472839	0.967757	9.13283	0.0754596	0.0878353	0.356536	1.28035	9.13283	4.52e-27	2.06e-26	-0.249535	0.841168	9.13283	2e-15	4.23e-15
VGF	-0.555276	0.680527	8.18111	1.89e-33	7.74e-33	0.356381	1.28021	8.18111	1.72e-09	3.7e-09	0.471986	1.38702	8.18111	1.78e-17	3.99e-17
CD3EAP	-0.362807	0.77765	8.38128	2e-63	2.24e-62	0.356239	1.28008	8.38128	9.98e-38	6.62e-37	0.198793	1.14774	8.38128	7.21e-14	1.45e-13
LRRC46	-0.181601	0.881724	7.16743	3.83e-24	1.16e-23	0.356169	1.28002	7.16743	3.86e-58	5.07e-57	-0.0584692	0.960282	7.16743	0.0069131	0.00884019
RNF34	-0.0318602	0.978158	10.03	0.206916	0.229638	0.35615	1.28001	10.03	6.25e-30	3.17e-29	-0.271095	0.82869	10.03	7.6e-20	1.83e-19
NUDCD1	0.0961694	1.06893	9.86102	6.53e-05	9.41e-05	0.356142	1.28	9.86102	1.07e-32	5.96e-32	-0.452898	0.730574	9.86102	3.75e-60	2.33e-59
PARP16	-0.108128	0.927791	9.6058	6.56e-08	1.1e-07	0.356022	1.27989	9.6058	3.1e-47	2.9e-46	-0.162676	0.893367	9.6058	8e-12	1.5e-11
VPS33A	0.028254	1.01978	10.231	0.200306	0.222769	0.355619	1.27953	10.231	5.43e-39	3.77e-38	-0.355989	0.781334	10.231	4.78e-44	2.1e-43
SOX12	0.160186	1.11743	9.15071	1.87e-09	3.35e-09	0.355528	1.27945	9.15071	1.47e-26	6.57e-26	-0.54326	0.686219	9.15071	7.11e-71	5.39e-70
G6PD	-0.248061	0.842027	8.12171	1.86e-28	6.36e-28	0.355472	1.2794	8.12171	1.97e-36	1.25e-35	0.036527	1.02564	8.12171	0.179052	0.20218
PSMB7	-0.0608685	0.958687	11.9006	0.00509122	0.00649539	0.355339	1.27929	11.9006	4.6e-40	3.33e-39	-0.22918	0.85312	11.9006	3.77e-19	8.92e-19
UBN1	-0.27147	0.828475	10.7094	4.53e-62	4.8e-61	0.355146	1.27912	10.7094	1.05e-66	1.77e-65	0.070059	1.04976	10.7094	0.000526593	0.000721581
ZC3HC1	-0.0303496	0.979183	10.922	0.100712	0.115695	0.355114	1.27909	10.922	9.16e-56	1.1e-54	-0.27232	0.827987	10.922	1.24e-36	4.56e-36
NPAS4	-0.324738	0.798444	6.47373	5.4e-13	1.11e-12	0.354916	1.27891	6.47373	4.84e-10	1.07e-09	0.145907	1.10643	6.47373	0.00687447	0.00879467
WNK3	0.245304	1.18534	8.20014	8.87e-17	2.11e-16	0.354826	1.27883	8.20014	1.34e-21	4.92e-21	-0.663511	0.63134	8.20014	6.07e-87	6.24e-86
FAU	-0.26905	0.829866	15.6159	3.34e-46	2.03e-45	0.354526	1.27857	15.6159	2.79e-50	2.87e-49	0.0671741	1.04766	15.6159	0.00364633	0.00474449
UBTD2	-0.00418991	0.9971	8.87414	0.838692	0.852903	0.354459	1.27851	8.87414	1.36e-44	1.17e-43	-0.308886	0.807265	8.87414	4.57e-38	1.75e-37
ST8SIA3	0.143756	1.10478	9.96805	1.34e-07	2.2e-07	0.354393	1.27845	9.96805	2.45e-25	1.04e-24	-0.518921	0.697893	9.96805	1.7e-61	1.09e-60
EIF2B1	-0.0619017	0.958	12.3817	0.00375581	0.00483533	0.354221	1.2783	12.3817	3.33e-41	2.52e-40	-0.226721	0.854575	12.3817	2.24e-19	5.32e-19
APIP	-0.0917039	0.938414	9.70968	0.000265324	0.00036779	0.354166	1.27825	9.70968	9.83e-30	4.95e-29	-0.18435	0.880045	9.70968	6.63e-10	1.17e-09
CTHRC1	-0.639366	0.641995	10.69	6.13e-41	3.14e-40	0.353954	1.27806	10.69	9.24e-09	1.91e-08	0.593557	1.50896	10.69	5.13e-25	1.42e-24
TIMM44	-0.105677	0.929369	10.0125	5.28e-08	8.89e-08	0.353633	1.27777	10.0125	1.53e-49	1.53e-48	-0.164034	0.892526	10.0125	1.17e-12	2.25e-12
WDR12	-0.00506587	0.996495	10.6839	0.81723	0.832832	0.353573	1.27772	10.6839	4.6e-39	3.2e-38	-0.306856	0.808402	10.6839	3.84e-33	1.31e-32
TMEM27	-0.111744	0.925469	6.80823	2.73e-05	4.01e-05	0.352587	1.27685	6.80823	2.62e-26	1.16e-25	-0.154489	0.89845	6.80823	1.11e-06	1.73e-06
TFDP1	0.00441869	1.00307	8.91317	0.842513	0.856187	0.352538	1.27681	8.91317	1.01e-37	6.73e-37	-0.319405	0.8014	8.91317	7.23e-35	2.58e-34
DPF2	-0.0828363	0.9442	13.05	0.00103592	0.00138445	0.352461	1.27674	13.05	3.1e-29	1.53e-28	-0.195429	0.873313	13.05	6.8e-11	1.24e-10
NDUFV3	-0.198981	0.871166	11.3232	3.89e-23	1.14e-22	0.352294	1.27659	11.3232	5.71e-45	4.92e-44	-0.0303466	0.979185	11.3232	0.211183	0.236318
LIN7C	-0.0275905	0.981057	9.03122	0.263556	0.28917	0.352235	1.27654	9.03122	1.27e-30	6.54e-30	-0.27368	0.827207	9.03122	4.3e-21	1.07e-20
KIF5B	-0.0421073	0.971235	9.75519	0.122414	0.139365	0.352146	1.27646	9.75519	3.28e-25	1.39e-24	-0.252986	0.839158	9.75519	3.98e-15	8.32e-15
POLH	-0.093448	0.93728	7.40536	9.57e-07	1.52e-06	0.352059	1.27638	7.40536	4.71e-51	4.94e-50	-0.180002	0.882702	7.40536	1.64e-15	3.46e-15
CLMN	-0.183689	0.880449	8.64948	4.57e-10	8.41e-10	0.351921	1.27626	8.64948	1.81e-21	6.63e-21	-0.0517312	0.964778	8.64948	0.14283	0.163199
C1orf74	0.0336123	1.02357	8.17888	0.169223	0.189712	0.351916	1.27625	8.17888	3.99e-31	2.1e-30	-0.36031	0.778997	8.17888	1.1e-36	4.06e-36
TCP11	-0.167872	0.890155	6.00605	1.05e-10	1.98e-10	0.35166	1.27603	6.00605	2.8e-27	1.29e-26	-0.0739606	0.950026	6.00605	0.0175047	0.0216783
NUBP2	-0.0870296	0.941459	10.2869	1.12e-05	1.68e-05	0.351623	1.276	10.2869	3.69e-47	3.44e-46	-0.188729	0.877378	10.2869	8.45e-16	1.8e-15
PARP2	0.0720892	1.05124	11.7447	0.00140552	0.00186421	0.351161	1.27559	11.7447	3.2e-36	2.02e-35	-0.414278	0.750395	11.7447	2.89e-57	1.69e-56
GSTCD	0.0671696	1.04766	7.92494	0.00233112	0.00304001	0.351156	1.27558	7.92494	6.3e-38	4.21e-37	-0.407288	0.754039	7.92494	5.49e-58	3.25e-57
RBMXL2	-0.257451	0.836565	5.97177	1.16e-14	2.56e-14	0.35096	1.27541	5.97177	7.76e-17	2.35e-16	0.0538701	1.03805	5.97177	0.178845	0.201986
TRIM24	0.130274	1.0945	12.9578	4.62e-08	7.79e-08	0.350682	1.27516	12.9578	3.05e-32	1.67e-31	-0.49648	0.708834	12.9578	2.01e-74	1.65e-73
SLAIN1	0.420364	1.33827	9.88575	6.9e-35	2.94e-34	0.350573	1.27507	9.88575	1.01e-15	2.91e-15	-0.90833	0.532801	9.88575	9.73e-124	2.02e-122
RRP15	0.0242191	1.01693	9.21902	0.251432	0.276575	0.350555	1.27505	9.21902	2.24e-41	1.71e-40	-0.345762	0.786892	9.21902	2.22e-45	1e-44
SMARCAD1	0.117469	1.08483	11.9872	1.27e-06	2e-06	0.350484	1.27499	11.9872	3.36e-31	1.77e-30	-0.478119	0.717913	11.9872	2.4e-66	1.69e-65
CTPS2	-0.127364	0.915503	7.93197	1.98e-13	4.15e-13	0.350127	1.27467	7.93197	4.66e-61	6.68e-60	-0.130123	0.913754	7.93197	3.2e-10	5.71e-10
TEX10	-0.0202166	0.986085	11.5225	0.390108	0.418507	0.34962	1.27422	11.5225	3.58e-33	2.03e-32	-0.281829	0.822548	11.5225	1.88e-24	5.14e-24
ANKRD37	-0.68134	0.623586	9.12031	2.07e-73	3.36e-72	0.349508	1.27413	9.12031	1.59e-12	3.96e-12	0.657111	1.57692	9.12031	3.84e-47	1.8e-46
DDX49	-0.0636675	0.956829	10.2412	0.00382755	0.00492441	0.349498	1.27412	10.2412	9.6e-38	6.37e-37	-0.220017	0.858555	10.2412	2.59e-17	5.78e-17
MEN1	-0.208479	0.865449	7.89063	2.45e-26	7.91e-26	0.349401	1.27403	7.89063	4.04e-46	3.62e-45	-0.0142887	0.990145	7.89063	0.547921	0.576227
OSBP	-0.257558	0.836503	9.83035	1.26e-46	7.8e-46	0.349318	1.27396	9.83035	7.25e-54	8.24e-53	0.0554794	1.0392	9.83035	0.0117789	0.0148105
FAM96B	-0.141546	0.906547	12.8582	1.54e-12	3.11e-12	0.349184	1.27384	12.8582	4.18e-45	3.62e-44	-0.109146	0.927137	12.8582	5.2e-06	7.86e-06
NDUFB10	-0.181049	0.882061	12.4603	2.18e-23	6.45e-23	0.348613	1.27334	12.4603	4.61e-54	5.29e-53	-0.0525414	0.964236	12.4603	0.0166599	0.0206697
DAK	-0.349569	0.784819	8.09655	8.8e-46	5.23e-45	0.34854	1.27327	8.09655	1.69e-28	8.09e-28	0.186833	1.13826	8.09655	4.88e-10	8.65e-10
IPO11	-0.147363	0.902899	8.31607	3.76e-16	8.73e-16	0.348445	1.27319	8.31607	4.87e-55	5.75e-54	-0.100229	0.932885	8.31607	3.85e-06	5.85e-06
HOXD4	-0.151401	0.900376	6.21575	4.54e-09	8.02e-09	0.348421	1.27317	6.21575	3.51e-27	1.61e-26	-0.0944739	0.936614	6.21575	0.00221981	0.00292715
ADRM1	-0.300752	0.811829	11.0356	7.92e-62	8.25e-61	0.348405	1.27315	11.0356	1.62e-51	1.71e-50	0.11763	1.08495	11.0356	1.47e-07	2.38e-07
GTF2A2	-0.0674013	0.954355	11.0722	0.00191366	0.00251002	0.348317	1.27307	11.0722	1.67e-38	1.14e-37	-0.213666	0.862343	11.0722	8.29e-17	1.83e-16
SYT6	-0.157521	0.896565	7.231	0.000420352	0.000575388	0.34831	1.27307	7.231	5.98e-10	1.32e-09	-0.0856843	0.942337	7.231	0.1079	0.124781
HLCS	-0.285192	0.820632	9.52441	2.2e-29	7.77e-29	0.348023	1.27281	9.52441	2.05e-27	9.45e-27	0.095873	1.06871	9.52441	0.001797	0.00238235
CXCL9	-1.36826	0.387357	9.32347	8.64e-56	7.39e-55	0.347932	1.27273	9.32347	0.00222639	0.00320153	1.63399	3.1037	9.32347	4.83e-56	2.73e-55
KCTD17	-0.136888	0.909479	8.96677	2.03e-08	3.48e-08	0.347737	1.27256	8.96677	2.89e-30	1.48e-29	-0.114475	0.923719	8.96677	8.58e-05	0.000122289
ZKSCAN5	0.0760759	1.05415	9.21835	9.43e-05	0.000134671	0.347605	1.27245	9.21835	1.02e-47	9.68e-47	-0.416781	0.749094	9.21835	3.38e-79	3.04e-78
TSSC1	0.00075721	1.00052	11.897	0.970575	0.973011	0.347568	1.27241	11.897	4.42e-43	3.59e-42	-0.309791	0.806758	11.897	1.7e-38	6.57e-38
C14orf1	-0.237448	0.848245	8.20411	4.21e-32	1.64e-31	0.347479	1.27234	8.20411	5.33e-43	4.32e-42	0.0285557	1.01999	8.20411	0.243292	0.270013
NUDT15	0.075512	1.05373	8.60441	0.00896949	0.0112756	0.347455	1.27231	8.60441	6.08e-22	2.27e-21	-0.415847	0.749579	8.60441	6.09e-35	2.17e-34
LZTFL1	-0.213884	0.862213	8.98118	1.29e-21	3.59e-21	0.346841	1.27177	8.98118	4.47e-35	2.72e-34	-0.0043393	0.996997	8.98118	0.87251	0.88303
MARK2	-0.249522	0.841175	9.18878	8.61e-56	7.37e-55	0.346777	1.27172	9.18878	4.58e-68	8.02e-67	0.0463246	1.03263	9.18878	0.0178897	0.0221361
FBXL12	-0.192922	0.874832	9.81575	2.86e-29	1e-28	0.346607	1.27157	9.81575	1.44e-59	1.97e-58	-0.0339002	0.976776	9.81575	0.10376	0.120257
MARS2	-0.143583	0.905268	6.43195	1.06e-12	2.16e-12	0.346133	1.27115	6.43195	1.15e-43	9.54e-43	-0.103543	0.930744	6.43195	1.79e-05	2.64e-05
PHOX2B	0.311916	1.24136	13.2495	3.1e-21	8.56e-21	0.34592	1.27096	13.2495	1.33e-16	3.97e-16	-0.750194	0.594524	13.2495	1.68e-88	1.77e-87
RNF26	-0.196053	0.872936	10.8127	1.06e-17	2.6e-17	0.345704	1.27077	10.8127	1.47e-33	8.45e-33	-0.0286524	0.980336	10.8127	0.298418	0.326708
RPP30	-0.086601	0.941739	7.7822	6.5e-06	9.91e-06	0.345329	1.27044	7.7822	2.06e-48	1.99e-47	-0.183748	0.880413	7.7822	6.41e-16	1.37e-15
ATP2A1	-0.134461	0.91101	7.10801	3.88e-07	6.26e-07	0.345258	1.27038	7.10801	1.81e-25	7.73e-25	-0.11572	0.922922	7.10801	0.000253528	0.000353256
ZNF639	-0.0180262	0.987583	9.96291	0.419564	0.448322	0.345258	1.27038	9.96291	7.1e-36	4.43e-35	-0.281066	0.822983	9.96291	6.77e-27	1.97e-26
ORMDL2	-0.247282	0.842482	10.0513	1.17e-37	5.48e-37	0.345161	1.27029	10.0513	5.48e-46	4.88e-45	0.0445789	1.03138	10.0513	0.0579711	0.068758
CCDC47	-0.312557	0.805213	10.7305	1.26e-49	8.57e-49	0.34513	1.27027	10.7305	1.07e-37	7.11e-37	0.137302	1.09985	10.7305	1.08e-07	1.77e-07
DDX20	-0.0421267	0.971222	10.3092	0.041255	0.0492281	0.345056	1.2702	10.3092	6.23e-42	4.85e-41	-0.246661	0.842845	10.3092	2.61e-24	7.12e-24
ITGB1BP2	-0.0294724	0.979779	8.45686	0.309754	0.33689	0.344633	1.26983	8.45686	1.81e-21	6.6e-21	-0.264256	0.832628	8.45686	1.28e-14	2.64e-14
KCNJ14	-0.285028	0.820726	9.01051	2.34e-15	5.28e-15	0.344515	1.26972	9.01051	3.82e-14	1.03e-13	0.0987555	1.07085	9.01051	0.022352	0.0274727
ZNF561	-0.0483052	0.967072	8.6835	0.0188202	0.0231195	0.344234	1.26948	8.6835	4.96e-42	3.88e-41	-0.237157	0.848415	8.6835	1.07e-22	2.79e-22
CCDC77	0.123915	1.08969	11.0666	3.25e-06	5.03e-06	0.344158	1.26941	11.0666	4.19e-25	1.77e-24	-0.481654	0.716156	11.0666	2.18e-55	1.22e-54
GATAD2A	-0.391444	0.762366	10.3061	2.59e-80	5.24e-79	0.344064	1.26933	10.3061	1.08e-37	7.14e-37	0.250274	1.18943	10.3061	1.04e-22	2.72e-22
UFD1L	-0.039102	0.973261	11.931	0.0795741	0.0923554	0.343734	1.26904	11.931	1.26e-35	7.8e-35	-0.249783	0.841023	11.931	1.77e-21	4.48e-21
ASTE1	-0.232045	0.851427	8.93453	4.22e-26	1.35e-25	0.343708	1.26901	8.93453	1.29e-35	8e-35	0.0242329	1.01694	8.93453	0.362091	0.391607
C11orf74	0.0687075	1.04878	10.5471	0.00844777	0.0106417	0.343633	1.26895	10.5471	3.85e-26	1.69e-25	-0.40279	0.756394	10.5471	3.2e-40	1.28e-39
KRTCAP2	-0.373397	0.771963	12.1111	3.22e-80	6.47e-79	0.343526	1.26885	12.1111	2.84e-41	2.16e-40	0.225124	1.16888	12.1111	2.73e-20	6.68e-20
CLSTN2	-0.0244605	0.983188	8.94171	0.609312	0.635253	0.343476	1.26881	8.94171	1.18e-08	2.43e-08	-0.270346	0.829121	8.94171	1.98e-06	3.05e-06
GDAP2	-0.124809	0.917126	8.13005	1.47e-12	2.98e-12	0.343381	1.26873	8.13005	1.43e-56	1.78e-55	-0.12776	0.915251	8.13005	1.3e-09	2.26e-09
UQCRFS1	-0.216567	0.860611	12.839	7.43e-32	2.87e-31	0.343338	1.26869	12.839	3.07e-50	3.15e-49	0.00258187	1.00179	12.839	0.908292	0.91708
ARMC6	-0.187954	0.87785	10.1162	1.52e-18	3.84e-18	0.343292	1.26865	10.1162	7.93e-38	5.27e-37	-0.0380104	0.973997	10.1162	0.140109	0.160174
NHEJ1	-0.127718	0.915278	7.61907	2.08e-08	3.57e-08	0.343038	1.26842	7.61907	9.96e-34	5.76e-33	-0.123323	0.918071	7.61907	5.77e-06	8.69e-06
ABHD10	-0.0182413	0.987436	8.59562	0.386567	0.415093	0.342974	1.26837	8.59562	8.68e-40	6.22e-39	-0.278731	0.824316	8.59562	1.2e-29	3.74e-29
TAF1A	0.0333668	1.0234	9.8555	0.156223	0.175717	0.34288	1.26829	9.8555	6.95e-32	3.76e-31	-0.351935	0.783533	9.8555	8.82e-38	3.34e-37
CALU	-0.353777	0.782533	8.97805	9.91e-63	1.07e-61	0.342791	1.26821	8.97805	2.34e-36	1.48e-35	0.197916	1.14704	8.97805	2.88e-14	5.87e-14
SHMT1	-0.309135	0.807125	8.05797	8.67e-33	3.46e-32	0.342786	1.2682	8.05797	2.29e-25	9.74e-25	0.134525	1.09773	8.05797	1.88e-05	2.78e-05
CHIC2	-0.221179	0.857864	9.51472	4.46e-22	1.26e-21	0.342772	1.26819	9.51472	8.98e-33	5.03e-32	0.00963396	1.0067	9.51472	0.72756	0.748032
SEC61G	-0.0805918	0.94567	12.0994	0.000461669	0.000630232	0.342572	1.26802	12.0994	3.62e-33	2.06e-32	-0.189832	0.876708	12.0994	3.43e-12	6.53e-12
KCNH4	-0.0389256	0.97338	8.2369	0.176038	0.196971	0.342475	1.26793	8.2369	1.47e-21	5.41e-21	-0.248915	0.841529	8.2369	2.57e-13	5.08e-13
GDF9	-0.00564963	0.996092	7.24002	0.823705	0.838767	0.34233	1.2678	7.24002	1.81e-27	8.35e-27	-0.296041	0.814485	7.24002	2.87e-23	7.61e-23
RPN1	-0.30104	0.811667	11.1399	2.16e-50	1.5e-49	0.342303	1.26778	11.1399	1.37e-40	1.02e-39	0.123459	1.08934	11.1399	5.92e-07	9.33e-07
CDK5RAP1	-0.115691	0.92294	9.49534	1.95e-10	3.65e-10	0.342249	1.26773	9.49534	6.47e-53	7.14e-52	-0.139702	0.907707	9.49534	1.11e-10	2.02e-10
MRPS11	-0.175424	0.885507	9.24391	3.49e-21	9.6e-21	0.342172	1.26766	9.24391	7.07e-50	7.17e-49	-0.0548087	0.962722	9.24391	0.0143969	0.0179504
RRS1	-0.381937	0.767407	10.1052	3.59e-38	1.71e-37	0.34204	1.26755	10.1052	1.6e-19	5.39e-19	0.238571	1.17982	10.1052	2.87e-11	5.31e-11
GOT2	-0.0175389	0.987917	10.1118	0.479747	0.508642	0.341952	1.26747	10.1118	1.38e-28	6.64e-28	-0.278821	0.824265	10.1118	1.27e-21	3.21e-21
SERBP1	-0.143395	0.905386	11.2461	2.5e-10	4.66e-10	0.341937	1.26746	11.2461	8.64e-34	5.03e-33	-0.100083	0.93298	11.2461	0.000222878	0.000311448
HYLS1	0.104607	1.0752	8.99222	0.000302397	0.000417829	0.341688	1.26724	8.99222	3.84e-21	1.38e-20	-0.452042	0.731007	8.99222	4.52e-41	1.85e-40
CHST11	-0.537832	0.688805	8.44911	4.39e-91	1.27e-89	0.341387	1.26697	8.44911	2.56e-22	9.69e-22	0.460532	1.37605	8.44911	2.9e-45	1.3e-44
ARL4D	-0.212633	0.862961	8.58254	3.19e-13	6.64e-13	0.340962	1.2666	8.58254	1.63e-20	5.75e-20	-0.000894838	0.99938	8.58254	0.979629	0.982173
SDSL	-0.895996	0.537376	9.17386	8.74e-88	2.26e-86	0.340636	1.26631	9.17386	1.41e-08	2.88e-08	0.969817	1.95859	9.17386	2.88e-71	2.21e-70
MLLT3	-0.144876	0.904457	7.9793	1.22e-09	2.2e-09	0.340625	1.2663	7.9793	2.19e-30	1.13e-29	-0.096814	0.935096	7.9793	0.000683917	0.000931978
IMPDH2	-0.164197	0.892425	10.9284	8.66e-08	1.44e-07	0.340544	1.26623	10.9284	9.34e-19	3.05e-18	-0.0693056	0.953097	10.9284	0.0588769	0.0697883
SNRPB2	-0.0987105	0.933867	11.3976	4.07e-07	6.57e-07	0.340529	1.26622	11.3976	1.36e-45	1.21e-44	-0.162288	0.893607	11.3976	2.34e-12	4.49e-12
GPATCH4	-0.289202	0.818354	10.5925	1.83e-26	5.94e-26	0.340158	1.26589	10.5925	5.08e-23	1.98e-22	0.108554	1.07815	10.5925	0.00095298	0.00128727
TBC1D16	-0.013422	0.99074	10.2119	0.581699	0.608546	0.34007	1.26582	10.2119	2.55e-29	1.26e-28	-0.282995	0.821883	10.2119	4.81e-23	1.27e-22
ING1	-0.406037	0.754694	8.85348	8.12e-102	3.35e-100	0.339792	1.26557	8.85348	2.16e-42	1.71e-41	0.274791	1.20982	8.85348	3.12e-31	1.02e-30
ZBED4	0.253938	1.19246	9.89557	2.98e-21	8.21e-21	0.339777	1.26556	9.89557	1.12e-23	4.48e-23	-0.662405	0.631824	9.89557	3.5e-106	5.21e-105
BSG	-0.269229	0.829763	10.5872	1.41e-28	4.84e-28	0.339776	1.26556	10.5872	1.8e-28	8.64e-28	0.0805293	1.05741	10.5872	0.00618978	0.00795123
MIB1	0.130984	1.09504	8.84451	8.09e-09	1.41e-08	0.339749	1.26554	8.84451	2.79e-33	1.59e-32	-0.487777	0.713123	8.84451	2.09e-79	1.88e-78
TPI1	-0.174378	0.886149	13.0795	3.47e-15	7.79e-15	0.339738	1.26553	13.0795	1.07e-34	6.44e-34	-0.0541312	0.963174	13.0795	0.0419811	0.0504322
ELAVL3	0.32579	1.25335	10.4182	1.28e-33	5.25e-33	0.339734	1.26552	10.4182	4.26e-23	1.66e-22	-0.764401	0.588698	10.4182	8.17e-144	2.67e-142
UBE2M	-0.168531	0.889748	10.8676	8.34e-12	1.64e-11	0.339569	1.26538	10.8676	3.62e-28	1.71e-27	-0.0622849	0.957746	10.8676	0.0351943	0.0425483
GABBR2	-0.15134	0.900414	6.40065	0.000129432	0.000183233	0.339221	1.26507	6.40065	9.34e-12	2.24e-11	-0.0863885	0.941878	6.40065	0.0671737	0.079161
ZNF146	0.0356669	1.02503	9.01009	0.103634	0.118886	0.339215	1.26507	9.01009	6.12e-36	3.82e-35	-0.351946	0.783527	9.01009	1.31e-43	5.68e-43
ZNF329	0.0474622	1.03345	8.55827	0.0276644	0.033508	0.338897	1.26479	8.55827	4.64e-37	3.01e-36	-0.368413	0.774634	8.55827	1.68e-49	8.27e-49
C15orf48	-0.674045	0.626747	7.61578	1.21e-53	9.51e-53	0.338468	1.26441	7.61578	2.71e-09	5.76e-09	0.656557	1.57632	7.61578	1.28e-35	4.62e-35
PSMA4	-0.178593	0.883565	12.2958	2.65e-18	6.66e-18	0.338343	1.2643	12.2958	3.87e-40	2.81e-39	-0.0469086	0.968008	12.2958	0.0570212	0.0677065
ECSIT	-0.0639662	0.956631	11.3063	0.00307871	0.00398934	0.338268	1.26424	11.3063	1.1e-36	7.06e-36	-0.209618	0.864766	11.3063	2.24e-16	4.86e-16
ENPP4	-0.415079	0.749978	9.83586	7.3e-17	1.74e-16	0.33794	1.26395	9.83586	9.32e-08	1.82e-07	0.289276	1.22203	9.83586	1.26e-06	1.96e-06
GNB2	-0.03698	0.974693	12.2634	0.157502	0.177052	0.33793	1.26394	12.2634	3.31e-25	1.4e-24	-0.247641	0.842272	12.2634	1.1e-15	2.33e-15
SP2	-0.0637707	0.95676	7.91025	0.000483026	0.000658765	0.337854	1.26388	7.91025	2.14e-51	2.26e-50	-0.209529	0.864819	7.91025	2.07e-22	5.38e-22
FN3KRP	-0.0794503	0.946418	12.3709	0.000108206	0.000153898	0.337577	1.26363	12.3709	1.86e-40	1.37e-39	-0.187017	0.87842	12.3709	1.4e-14	2.88e-14
ANP32C	-0.271273	0.828588	7.12853	3.09e-30	1.13e-29	0.337466	1.26354	7.12853	2.76e-29	1.36e-28	0.085483	1.06104	7.12853	0.00298762	0.00391244
SNX1	-0.577564	0.670094	10.4738	6.78e-164	2.62e-161	0.337446	1.26352	10.4738	5.12e-31	2.69e-30	0.520456	1.43441	10.4738	6.96e-86	7e-85
NDUFS7	-0.231489	0.851755	12.3996	1.54e-27	5.15e-27	0.337367	1.26345	12.3996	1.96e-36	1.25e-35	0.0290752	1.02036	12.3996	0.25979	0.287352
MAPK13	-0.47625	0.718844	7.79081	3.25e-98	1.16e-96	0.337354	1.26344	7.79081	1.84e-29	9.18e-29	0.376664	1.29834	7.79081	2.85e-41	1.18e-40
XPR1	0.0100179	1.00697	8.58435	0.663673	0.687166	0.337152	1.26326	8.58435	3.52e-32	1.93e-31	-0.31369	0.804581	8.58435	2.24e-31	7.34e-31
C15orf27	-0.305901	0.808937	7.73768	6.78e-11	1.29e-10	0.337088	1.2632	7.73768	1.36e-08	2.78e-08	0.134993	1.09809	7.73768	0.0162284	0.0201559
PITPNM1	-0.415613	0.749701	8.89294	1.3e-37	6.08e-37	0.337068	1.26319	8.89294	5.24e-16	1.53e-15	0.29081	1.22333	8.89294	1.27e-13	2.54e-13
THAP7	-0.142145	0.906171	8.44213	1.91e-09	3.42e-09	0.337062	1.26318	8.44213	3.49e-30	1.78e-29	-0.0975277	0.934633	8.44213	0.000569807	0.000779689
PNMA1	0.0543241	1.03837	13.6664	0.0322952	0.0389135	0.337056	1.26318	13.6664	1.38e-26	6.19e-26	-0.376523	0.770292	13.6664	3.67e-37	1.37e-36
TLX3	-0.120844	0.91965	6.62245	3.4e-05	4.98e-05	0.336991	1.26312	6.62245	2.69e-20	9.38e-20	-0.127714	0.91528	6.62245	0.000238945	0.000333418
ZNF544	0.0290032	1.02031	9.46009	0.15912	0.178802	0.33667	1.26284	9.46009	4.31e-40	3.13e-39	-0.340223	0.789919	9.46009	3.47e-46	1.59e-45
RBM4B	0.0860366	1.06145	11.3549	0.000269065	0.000372886	0.336528	1.26271	11.3549	2e-30	1.03e-29	-0.421087	0.746862	11.3549	6.89e-54	3.73e-53
ANKRD22	-0.642914	0.640418	6.58563	2.32e-52	1.73e-51	0.33644	1.26264	6.58563	8.84e-10	1.92e-09	0.614151	1.53066	6.58563	1.77e-33	6.09e-33
IDH2	-0.159603	0.895271	9.923	3.99e-15	8.92e-15	0.33618	1.26241	9.923	2.2e-40	1.61e-39	-0.071953	0.951349	9.923	0.00318743	0.00416704
SPATA18	-0.151428	0.900359	7.38966	9.58e-10	1.74e-09	0.336073	1.26232	7.38966	1.78e-27	8.22e-27	-0.0834672	0.943787	7.38966	0.00484633	0.00626437
EXOSC4	-0.279859	0.823672	10.6134	1.07e-29	3.83e-29	0.335963	1.26222	10.6134	7.77e-27	3.5e-26	0.099011	1.07104	10.6134	0.000953602	0.00128796
ESRRA	-0.495787	0.709175	10.4916	3.79e-103	1.66e-101	0.335902	1.26217	10.4916	3.49e-28	1.65e-27	0.405697	1.32473	10.4916	3.12e-46	1.44e-45
YIPF4	-0.13405	0.91127	9.56152	1.05e-09	1.9e-09	0.335852	1.26212	9.56152	1.03e-34	6.19e-34	-0.10795	0.927906	9.56152	3.94e-05	5.7e-05
POLG2	0.0345847	1.02426	11.5955	0.172205	0.192924	0.335766	1.26205	11.5955	1.71e-26	7.6e-26	-0.347345	0.786029	11.5955	8.62e-32	2.86e-31
CHERP	-0.0406419	0.972222	10.6844	0.0312532	0.0377011	0.335724	1.26201	10.6844	1.36e-47	1.28e-46	-0.240481	0.846463	10.6844	1.58e-27	4.67e-27
GTF3C2	-0.0167882	0.988431	9.87865	0.358119	0.386157	0.335664	1.26196	9.87865	6.64e-51	6.93e-50	-0.274302	0.826851	9.87865	4.28e-38	1.64e-37
ABHD3	-0.38724	0.764591	8.96452	6.17e-48	3.99e-47	0.335629	1.26193	8.96452	1.04e-22	4.02e-22	0.251796	1.19069	8.96452	8.02e-15	1.66e-14
EFNA3	0.0689222	1.04893	7.45641	0.018426	0.0226402	0.335512	1.26183	7.45641	4.4e-20	1.52e-19	-0.395882	0.760025	7.45641	5.64e-31	1.82e-30
IL5	-0.165199	0.891806	5.77675	7.76e-16	1.78e-15	0.335262	1.26161	5.77675	2.09e-39	1.48e-38	-0.0631914	0.957144	5.77675	0.0103221	0.0130397
FOXJ1	-0.222262	0.85722	7.42495	5.44e-20	1.44e-19	0.335179	1.26153	7.42495	4.97e-28	2.34e-27	0.0179159	1.0125	7.42495	0.540638	0.569033
SMEK1	-0.22997	0.852653	10.0527	2.61e-31	9.85e-31	0.334897	1.26129	10.0527	1.69e-41	1.3e-40	0.0291123	1.02038	10.0527	0.225216	0.251076
MTMR4	0.131618	1.09552	11.1311	3.88e-08	6.56e-08	0.334844	1.26124	11.1311	3.57e-29	1.75e-28	-0.48432	0.714834	11.1311	7.22e-70	5.39e-69
STYXL1	-0.191865	0.875473	9.44538	6.2e-12	1.23e-11	0.334722	1.26113	9.44538	1.35e-21	4.98e-21	-0.0248441	0.982927	9.44538	0.458079	0.487678
NPM3	-0.292124	0.816699	11.1828	4.31e-38	2.04e-37	0.334571	1.261	11.1828	2.72e-31	1.44e-30	0.117665	1.08498	11.1828	1.96e-05	2.89e-05
CETN2	-0.343393	0.788186	10.9949	1.47e-36	6.58e-36	0.33446	1.26091	10.9949	5.67e-22	2.12e-21	0.190568	1.14121	10.9949	7.67e-09	1.3e-08
COCH	0.260224	1.19766	10.2375	4.3e-13	8.89e-13	0.334227	1.2607	10.2375	1.81e-13	4.71e-13	-0.666402	0.630076	10.2375	7.41e-58	4.37e-57
XAB2	-0.166629	0.890922	7.88493	3.52e-19	9.08e-19	0.334153	1.26064	7.88493	2.15e-47	2.02e-46	-0.0601757	0.959147	7.88493	0.00727106	0.00928564
SYT16	-0.127893	0.915167	5.63145	1.1e-07	1.82e-07	0.333959	1.26047	5.63145	1.04e-28	5.05e-28	-0.115011	0.923375	5.63145	6.34e-05	9.09e-05
IGHMBP2	-0.177381	0.884307	8.79123	2.24e-17	5.44e-17	0.332801	1.25946	8.79123	3.18e-37	2.07e-36	-0.0437054	0.97016	8.79123	0.0825401	0.0965914
HTATSF1	0.0388953	1.02733	12.5616	0.154907	0.174389	0.332613	1.25929	12.5616	1.84e-22	7.03e-22	-0.350666	0.784222	12.5616	6.94e-28	2.07e-27
CIZ1	-0.0917228	0.938402	10.3733	1.49e-06	2.35e-06	0.332573	1.25926	10.3733	1.75e-45	1.54e-44	-0.165144	0.891839	10.3733	2.83e-13	5.59e-13
ZNF134	-0.111458	0.925652	9.04532	5e-09	8.83e-09	0.33241	1.25911	9.04532	2.77e-45	2.42e-44	-0.136974	0.909425	9.04532	1.62e-09	2.82e-09
ZNF100	0.042267	1.02973	9.15097	0.0515418	0.0609628	0.33174	1.25853	9.15097	5.08e-35	3.07e-34	-0.354679	0.782044	9.15097	3.82e-45	1.71e-44
ALS2	-0.0865869	0.941748	8.25397	2.02e-05	2.98e-05	0.331292	1.25814	8.25397	9.71e-40	6.94e-39	-0.171299	0.888043	8.25397	1.15e-12	2.23e-12
NDUFA13	-0.20005	0.87052	13.344	8.21e-19	2.1e-18	0.331202	1.25806	13.344	1.36e-31	7.3e-31	-0.0100943	0.993028	13.344	0.71077	0.732395
ZNF22	-0.102813	0.931216	10.1104	5.2e-07	8.33e-07	0.331156	1.25802	10.1104	5.98e-39	4.14e-38	-0.148137	0.902415	10.1104	1.21e-09	2.11e-09
CBX4	-0.185554	0.879311	9.57186	7.97e-11	1.51e-10	0.33112	1.25799	9.57186	2.66e-20	9.27e-20	-0.0306064	0.979009	9.57186	0.371053	0.400637
FAM136A	-0.0761749	0.948569	11.8089	2.07e-05	3.05e-05	0.331099	1.25797	11.8089	2.14e-51	2.26e-50	-0.185914	0.879092	11.8089	1.43e-18	3.34e-18
FASN	0.0355183	1.02492	8.93737	0.200664	0.223146	0.330862	1.25776	8.93737	1.3e-21	4.77e-21	-0.344315	0.787682	8.93737	3.81e-26	1.08e-25
RRAS2	-0.393087	0.761498	9.04164	2.3e-39	1.12e-38	0.330761	1.25768	9.04164	7.08e-18	2.23e-17	0.264424	1.20116	9.04164	3.23e-13	6.36e-13
PCTP	-0.304262	0.809857	10.5243	5.62e-34	2.33e-33	0.330602	1.25754	10.5243	2.97e-25	1.26e-24	0.138426	1.1007	10.5243	5.23e-06	7.9e-06
GMEB2	-0.22123	0.857834	8.40607	1.32e-33	5.42e-33	0.330592	1.25753	8.40607	4.87e-47	4.52e-46	0.0205252	1.01433	8.40607	0.356971	0.386321
PRPS1L1	-0.297533	0.813642	8.06723	1.83e-41	9.55e-41	0.330537	1.25748	8.06723	5.08e-32	2.77e-31	0.128929	1.09348	8.06723	1.63e-06	2.53e-06
SMUG1	-0.107702	0.928065	9.13886	1.29e-07	2.12e-07	0.329875	1.2569	9.13886	5.82e-39	4.04e-38	-0.140056	0.907484	9.13886	8.06e-09	1.37e-08
ZNF576	-0.233596	0.850512	8.64606	3.14e-33	1.27e-32	0.329724	1.25677	8.64606	2.08e-41	1.59e-40	0.0388558	1.0273	8.64606	0.100468	0.116676
RYK	-0.327395	0.796974	9.02814	1.51e-50	1.05e-49	0.329522	1.2566	9.02814	6.42e-32	3.48e-31	0.172237	1.1268	9.02814	1.27e-10	2.3e-10
RPS27L	-0.362811	0.777648	11.937	4.31e-51	3.08e-50	0.329482	1.25656	11.937	2.27e-26	1e-25	0.222565	1.16681	11.937	4.19e-14	8.5e-14
PIAS4	-0.0724	0.951055	8.37261	0.00148028	0.00195911	0.329461	1.25654	8.37261	2.35e-31	1.25e-30	-0.18982	0.876715	8.37261	2.02e-12	3.87e-12
MARK3	-0.135812	0.910158	10.4493	9.7e-12	1.9e-11	0.329373	1.25647	10.4493	2e-40	1.47e-39	-0.0996925	0.933232	10.4493	2.94e-05	4.29e-05
RAD23A	-0.238676	0.847523	10.0896	1.41e-31	5.38e-31	0.329224	1.25634	10.0896	1.56e-37	1.02e-36	0.0465137	1.03277	10.0896	0.0607035	0.0718725
RPS6KB2	-0.169665	0.889049	8.32122	9.56e-20	2.51e-19	0.329223	1.25634	8.32122	9.86e-46	8.73e-45	-0.0514852	0.964942	8.32122	0.0220257	0.0270861
TULP1	-0.108844	0.927331	6.78337	0.000369814	0.000508192	0.328908	1.25606	6.78337	9.08e-18	2.85e-17	-0.137576	0.909045	6.78337	0.000158235	0.000222837
ZNF420	0.141297	1.1029	8.52273	5.02e-06	7.68e-06	0.328808	1.25598	8.52273	2.64e-17	8.13e-17	-0.492704	0.710692	8.52273	1.36e-42	5.82e-42
MED6	-0.106891	0.928587	9.02152	2.86e-08	4.87e-08	0.328796	1.25596	9.02152	2.07e-43	1.7e-42	-0.140249	0.907362	9.02152	9.57e-10	1.68e-09
MRPL16	-0.408529	0.753391	11.7247	2.2e-102	9.34e-101	0.328526	1.25573	11.7247	2.59e-39	1.82e-38	0.288337	1.22123	11.7247	4.22e-34	1.48e-33
C14orf178	-0.142396	0.906013	6.51136	7.75e-10	1.41e-09	0.328215	1.25546	6.51136	6.7e-30	3.39e-29	-0.0893135	0.93997	6.51136	0.00126328	0.00169065
PSME3	-0.114277	0.923845	10.2552	1.5e-08	2.58e-08	0.328065	1.25533	10.2552	2.66e-39	1.87e-38	-0.129112	0.914394	10.2552	8.07e-08	1.32e-07
AP1G2	-0.252488	0.839448	9.82341	2.26e-17	5.49e-17	0.328052	1.25532	9.82341	2.82e-18	9.02e-18	0.0671683	1.04766	9.82341	0.0608722	0.0720502
BAHD1	-0.22923	0.85309	11.7086	2.62e-29	9.21e-29	0.327856	1.25515	11.7086	2.11e-37	1.38e-36	0.0343161	1.02407	11.7086	0.165503	0.187777
PASD1	-0.235433	0.84943	5.65796	3.28e-10	6.07e-10	0.327732	1.25504	5.65796	4.28e-12	1.04e-11	0.0432348	1.03042	5.65796	0.335455	0.364603
IQCC	0.0224769	1.0157	7.92837	0.322349	0.3498	0.327709	1.25502	7.92837	2.75e-31	1.46e-30	-0.322995	0.799408	7.92837	3.48e-34	1.23e-33
TDRKH	0.0349515	1.02452	8.4215	0.143404	0.162053	0.327606	1.25493	8.4215	2.57e-28	1.23e-27	-0.340619	0.789703	8.4215	2.34e-34	8.24e-34
SNRPC	0.00448246	1.00311	10.3387	0.822131	0.837385	0.327552	1.25488	10.3387	1.59e-40	1.17e-39	-0.297303	0.813772	10.3387	1.42e-37	5.33e-37
MBIP	-0.0219377	0.984909	10.5493	0.316322	0.343614	0.32746	1.2548	10.5493	1.37e-33	7.88e-33	-0.259702	0.83526	10.5493	5.48e-24	1.48e-23
MMD2	-0.309868	0.806716	6.80196	9.25e-18	2.28e-17	0.327426	1.25477	6.80196	8.73e-13	2.2e-12	0.149208	1.10896	6.80196	0.000587325	0.00080328
SGTA	-0.0520892	0.964539	10.9573	0.00617291	0.00784258	0.327356	1.25471	10.9573	1.97e-44	1.67e-43	-0.216792	0.860476	10.9573	3.52e-22	9.07e-22
FUNDC2	-0.242638	0.845199	8.53482	1.25e-48	8.25e-48	0.327202	1.25458	8.53482	1.51e-55	1.8e-54	0.0539359	1.03809	8.53482	0.00796953	0.0101463
KRT18	-0.50774	0.703323	9.13575	4.92e-37	2.25e-36	0.326857	1.25428	9.13575	2e-10	4.5e-10	0.430706	1.34789	9.13575	3.7e-19	8.75e-19
HMGCS1	-0.0581294	0.960509	10.3598	0.0970389	0.111674	0.326758	1.25419	10.3598	1.06e-13	2.79e-13	-0.207684	0.865926	10.3598	6e-07	9.45e-07
HMGCR	0.113624	1.08194	12.6198	9.77e-05	0.000139344	0.326685	1.25413	12.6198	3.8e-19	1.26e-18	-0.451521	0.731272	12.6198	2.36e-40	9.46e-40
DR1	-0.140884	0.906963	10.1726	2.01e-14	4.37e-14	0.326613	1.25407	10.1726	1.54e-46	1.39e-45	-0.0900386	0.939498	10.1726	4.54e-05	6.55e-05
DDX42	-0.0719295	0.951365	10.9087	0.000533943	0.000725984	0.326464	1.25394	10.9087	5.85e-37	3.78e-36	-0.187826	0.877928	10.9087	2.18e-14	4.45e-14
PIGW	-0.0157694	0.989129	7.77758	0.488656	0.517566	0.326344	1.25383	7.77758	7.17e-31	3.74e-30	-0.26747	0.830775	7.77758	1.54e-23	4.13e-23
BRPF1	-0.126296	0.916181	8.92662	7.25e-10	1.32e-09	0.325995	1.25353	8.92662	1.52e-37	1e-36	-0.110205	0.926457	8.92662	6.81e-06	1.02e-05
ZBTB33	-0.071943	0.951356	8.51194	2.35e-05	3.47e-05	0.325796	1.25336	8.51194	3.59e-55	4.25e-54	-0.187214	0.8783	8.51194	1.09e-20	2.71e-20
ZNF623	0.0340514	1.02388	8.0441	0.168234	0.188714	0.325687	1.25326	8.0441	3.32e-26	1.46e-25	-0.337635	0.791337	8.0441	1.43e-31	4.71e-31
REEP4	-0.430491	0.742009	8.61907	9.53e-57	8.42e-56	0.32564	1.25322	8.61907	1.79e-20	6.28e-20	0.322087	1.25014	8.61907	1.92e-22	4.97e-22
TMEM79	-0.119879	0.920265	9.07204	2.72e-08	4.63e-08	0.32529	1.25292	9.07204	7.29e-34	4.26e-33	-0.118691	0.921023	9.07204	3.99e-06	6.05e-06
EDC3	-0.0456202	0.968873	8.57867	0.00929081	0.0116656	0.325022	1.25268	8.57867	1.01e-51	1.08e-50	-0.223906	0.856244	8.57867	1.32e-27	3.93e-27
MTHFD2L	0.0353666	1.02482	6.89635	0.149989	0.169181	0.324983	1.25265	6.89635	2.15e-26	9.51e-26	-0.338878	0.790656	6.89635	3.6e-32	1.2e-31
FBXW8	-0.0429158	0.970691	7.86565	0.0141746	0.0175692	0.3249	1.25258	7.86565	5.99e-52	6.44e-51	-0.227638	0.854032	7.86565	1.2e-28	3.66e-28
MLX	-0.121044	0.919522	10.3035	1.9e-09	3.41e-09	0.324826	1.25251	10.3035	1.35e-38	9.3e-38	-0.116625	0.922343	10.3035	1.25e-06	1.95e-06
NDUFA11	-0.269432	0.829646	12.6375	2.44e-39	1.18e-38	0.324793	1.25249	12.6375	9.41e-36	5.85e-35	0.0941245	1.06742	12.6375	0.000169499	0.00023841
TMEM45A	0.0157701	1.01099	9.72666	0.58785	0.614536	0.324687	1.25239	9.72666	4.4e-19	1.46e-18	-0.310787	0.806202	9.72666	1.19e-19	2.86e-19
RAB28	-0.10248	0.931431	8.27625	7.45e-07	1.19e-06	0.324617	1.25233	8.27625	1.23e-36	7.89e-36	-0.142802	0.905758	8.27625	6.83e-09	1.16e-08
CCDC51	-0.0706004	0.952242	9.99357	0.000863358	0.00115986	0.324405	1.25215	9.99357	4.5e-35	2.73e-34	-0.187884	0.877892	9.99357	6.95e-14	1.4e-13
MAPKAPK5	0.00158322	1.0011	10.7226	0.942857	0.948589	0.323971	1.25177	10.7226	2.52e-32	1.39e-31	-0.290005	0.817899	10.7226	3.25e-29	1e-28
MOSPD1	-0.209099	0.865078	8.31061	5.07e-20	1.34e-19	0.323889	1.2517	8.31061	1.39e-29	6.97e-29	0.00925087	1.00643	8.31061	0.736816	0.75634
ZNF227	-0.0243425	0.983269	8.69742	0.349286	0.377158	0.323822	1.25164	8.69742	1.71e-23	6.77e-23	-0.253056	0.839117	8.69742	1.65e-16	3.61e-16
CNBP	-0.28719	0.819497	10.177	2.21e-69	3.05e-68	0.323598	1.25145	10.177	1.92e-54	2.22e-53	0.120404	1.08704	10.177	2.58e-09	4.45e-09
YTHDF1	-0.180566	0.882357	10.3052	1.13e-24	3.47e-24	0.323579	1.25143	10.3052	2.29e-49	2.27e-48	-0.0309923	0.978747	10.3052	0.145613	0.16622
MRPL50	-0.0336782	0.976926	10.5337	0.102372	0.11752	0.323562	1.25142	10.5337	6.07e-37	3.92e-36	-0.239568	0.846999	10.5337	4.81e-23	1.27e-22
PARD6B	-0.0535176	0.963584	7.28739	0.0040587	0.00521196	0.323548	1.2514	7.28739	2.78e-45	2.43e-44	-0.211382	0.86371	7.28739	5.33e-22	1.37e-21
PKD2L1	-0.447266	0.733431	7.85364	3.75e-26	1.2e-25	0.323193	1.2511	7.85364	2.24e-09	4.79e-09	0.348083	1.27287	7.85364	7.68e-12	1.45e-11
RNF113A	-0.355528	0.781584	11.2124	2.37e-65	2.83e-64	0.322937	1.25087	11.2124	3.13e-33	1.78e-32	0.218036	1.16315	11.2124	1.65e-17	3.7e-17
EEF1E1	0.0367729	1.02582	10.7864	0.095443	0.10998	0.322818	1.25077	10.7864	3.62e-32	1.99e-31	-0.338952	0.790615	10.7864	6.71e-40	2.67e-39
EDARADD	-0.314752	0.803989	11.4832	3.05e-37	1.41e-36	0.322758	1.25072	11.4832	1.11e-24	4.58e-24	0.160291	1.11751	11.4832	9.01e-08	1.47e-07
ZNF124	0.0707123	1.05024	8.75367	0.0167267	0.0206222	0.322702	1.25067	8.75367	2.69e-18	8.62e-18	-0.387045	0.764694	8.75367	5.06e-29	1.56e-28
PA2G4	-0.067284	0.954433	11.9702	0.000319651	0.000441038	0.322389	1.2504	11.9702	1.54e-44	1.31e-43	-0.190803	0.876118	11.9702	5.58e-18	1.27e-17
ZFPL1	-0.131845	0.912664	8.72987	1.31e-10	2.47e-10	0.32232	1.25034	8.72987	1.32e-36	8.45e-36	-0.0990612	0.93364	8.72987	5.42e-05	7.8e-05
SYAP1	-0.346866	0.78629	10.4567	9.2e-44	5.13e-43	0.321967	1.25003	10.4567	9.02e-24	3.62e-23	0.206598	1.15396	10.4567	1.12e-11	2.1e-11
PDZD11	-0.182592	0.881119	9.93439	2.19e-22	6.24e-22	0.321965	1.25003	9.93439	4.59e-43	3.73e-42	-0.0266818	0.981676	9.93439	0.239003	0.265501
RBM41	-0.164517	0.892227	8.08514	7.5e-18	1.85e-17	0.321368	1.24951	8.08514	1.46e-41	1.13e-40	-0.0518189	0.964719	8.08514	0.0242972	0.0297877
ZNF14	-0.0576222	0.960846	9.71984	0.0475579	0.0564351	0.321201	1.24937	9.71984	1.06e-18	3.46e-18	-0.203468	0.86846	9.71984	3.69e-09	6.33e-09
FAM58A	-0.360294	0.779006	10.841	1.02e-56	8.98e-56	0.321142	1.24932	10.841	4.78e-28	2.25e-27	0.226399	1.16991	10.841	3.65e-16	7.87e-16
TCOF1	-0.192881	0.874857	10.3717	1.24e-30	4.57e-30	0.321098	1.24928	10.3717	2.43e-53	2.73e-52	-0.0113006	0.992198	10.3717	0.578899	0.606164
PSPN	-0.162727	0.893335	8.09746	2.35e-13	4.92e-13	0.321025	1.24922	8.09746	6.25e-31	3.27e-30	-0.0540567	0.963224	8.09746	0.042563	0.05111
RFC1	-0.185483	0.879354	9.96155	7.75e-22	2.18e-21	0.320892	1.2491	9.96155	2.33e-40	1.7e-39	-0.021623	0.985124	9.96155	0.353857	0.383166
POLE	-0.0294697	0.97978	7.57302	0.157218	0.176785	0.320837	1.24905	7.57302	1.39e-35	8.62e-35	-0.243123	0.844914	7.57302	3.08e-23	8.14e-23
NEK4	-0.0612652	0.958423	9.28703	0.000306292	0.00042296	0.320817	1.24904	9.28703	8.66e-54	9.8e-53	-0.197954	0.871786	9.28703	3.81e-23	1e-22
IRF2BP1	-0.101207	0.932253	9.59485	3.62e-06	5.59e-06	0.320591	1.24884	9.59485	3.78e-32	2.07e-31	-0.141033	0.90687	9.59485	5.86e-08	9.65e-08
COX6B1	-0.256342	0.837208	13.3607	2.43e-37	1.12e-36	0.32057	1.24882	13.3607	1.59e-36	1.01e-35	0.0792887	1.0565	13.3607	0.00118503	0.00158904
BMPR1A	0.0814036	1.05805	8.49839	0.000693275	0.000937013	0.320041	1.24837	8.49839	9.59e-27	4.32e-26	-0.399864	0.75793	8.49839	6.82e-47	3.17e-46
ABAT	-0.264053	0.832745	9.5946	2.06e-14	4.5e-14	0.320033	1.24836	9.5946	2.4e-13	6.2e-13	0.0907148	1.0649	9.5946	0.0287087	0.0349998
ZC3H8	-0.0629315	0.957317	8.48906	0.00133891	0.00177789	0.319863	1.24821	8.48906	8.65e-40	6.2e-39	-0.19474	0.87373	8.48906	4.38e-17	9.74e-17
PFN2	0.182213	1.13462	10.3458	1.16e-10	2.18e-10	0.319833	1.24819	10.3458	2.31e-19	7.74e-19	-0.542836	0.68642	10.3458	2.35e-62	1.53e-61
AGPAT5	0.0186015	1.01298	10.1382	0.372559	0.400761	0.319744	1.24811	10.1382	2.9e-35	1.78e-34	-0.310418	0.806408	10.1382	2.04e-37	7.66e-37
MFSD3	-0.236042	0.849072	8.70369	2.67e-16	6.23e-16	0.319516	1.24791	8.70369	1.67e-18	5.4e-18	0.0513957	1.03627	8.70369	0.138317	0.158251
NLRP11	-0.102881	0.931172	5.86677	0.00426607	0.00547158	0.319494	1.24789	5.86677	1.65e-12	4.11e-12	-0.137683	0.908978	5.86677	0.00132511	0.00177155
DHFRL1	-0.108054	0.927839	8.17503	3.74e-09	6.63e-09	0.319454	1.24786	8.17503	3.17e-45	2.76e-44	-0.1303	0.913641	8.17503	2.43e-09	4.19e-09
ENTPD7	-0.226758	0.854553	7.00505	1.8e-40	9.07e-40	0.319441	1.24785	7.00505	1.93e-50	2e-49	0.0382792	1.02689	7.00505	0.0657557	0.0775688
SORCS2	-0.559779	0.678406	7.7116	1.32e-62	1.43e-61	0.319272	1.2477	7.7116	3.02e-13	7.75e-13	0.511342	1.42538	7.7116	2.59e-36	9.45e-36
CPT1C	0.126954	1.09199	12.5936	3.04e-06	4.71e-06	0.319228	1.24766	12.5936	7.13e-21	2.54e-20	-0.463826	0.725061	12.5936	4.99e-49	2.44e-48
ZCCHC3	-0.100725	0.932564	9.18343	8e-09	1.4e-08	0.319196	1.24763	9.18343	6.9e-50	7e-49	-0.140479	0.907218	9.18343	1.35e-11	2.52e-11
ZNF43	0.202516	1.1507	9.30447	9.44e-09	1.65e-08	0.319183	1.24762	9.30447	7.26e-13	1.84e-12	-0.57109	0.673108	9.30447	6.25e-44	2.74e-43
SDAD1	-0.093638	0.937157	9.56807	7.12e-07	1.14e-06	0.319026	1.24749	9.56807	1.44e-42	1.15e-41	-0.150391	0.901006	9.56807	2.06e-11	3.82e-11
ZBTB3	-0.176246	0.885003	9.38748	1.12e-11	2.2e-11	0.318603	1.24712	9.38748	1.41e-22	5.41e-22	-0.0327074	0.977584	9.38748	0.293453	0.321821
TIGD4	-0.120478	0.919883	5.89354	1.04e-05	1.57e-05	0.318476	1.24701	5.89354	1.32e-20	4.65e-20	-0.111788	0.92544	5.89354	0.000605515	0.000827866
PAXIP1	0.0347313	1.02437	11.4708	0.117941	0.134526	0.318426	1.24697	11.4708	7.15e-31	3.73e-30	-0.332152	0.794351	11.4708	9.22e-38	3.49e-37
TTLL5	-0.107937	0.927914	8.90644	4.08e-08	6.9e-08	0.318384	1.24693	8.90644	5.42e-39	3.77e-38	-0.129516	0.914138	8.90644	3.28e-08	5.44e-08
ZBTB39	0.134828	1.09796	8.04605	1.22e-08	2.11e-08	0.318325	1.24688	8.04605	4.98e-27	2.27e-26	-0.474206	0.719863	8.04605	1.93e-68	1.4e-67
FAM89B	-0.0972808	0.934793	12.7841	7.68e-07	1.22e-06	0.318154	1.24673	12.7841	5.78e-39	4.01e-38	-0.144444	0.904728	12.7841	6.76e-10	1.19e-09
TMEM56	-0.181894	0.881545	6.24149	6.39e-11	1.22e-10	0.318035	1.24663	6.24149	1.01e-19	3.44e-19	-0.0241827	0.983378	6.24149	0.468707	0.498305
LSM14A	-0.306577	0.808558	11.952	3.41e-62	3.62e-61	0.318035	1.24663	11.952	2.34e-41	1.78e-40	0.152876	1.11178	11.952	1.61e-11	3e-11
ANAPC10	-0.136594	0.909664	9.74169	9.8e-13	2e-12	0.318017	1.24662	9.74169	8.13e-41	6.07e-40	-0.0884948	0.940503	9.74169	0.000114337	0.000162141
PDHX	-0.0484859	0.966951	10.4391	0.0267927	0.0324997	0.317981	1.24658	10.4391	1.18e-31	6.33e-31	-0.213583	0.862393	10.4391	1.44e-16	3.15e-16
IFT81	0.0844737	1.0603	6.80059	0.000416083	0.000569882	0.317931	1.24654	6.80059	1.55e-26	6.93e-26	-0.40235	0.756625	6.80059	9.68e-48	4.6e-47
KLHDC8B	-0.189507	0.876905	10.2939	1.16e-10	2.18e-10	0.31783	1.24645	10.2939	8.82e-18	2.77e-17	-0.0131889	0.9909	10.2939	0.708284	0.729963
GDAP1L1	0.387927	1.30851	12.7811	2.52e-27	8.36e-27	0.317764	1.2464	12.7811	3.77e-12	9.2e-12	-0.833125	0.561312	12.7811	4.36e-92	4.99e-91
PPEF1	0.0982133	1.07045	7.84094	0.0535378	0.0632075	0.317747	1.24638	7.84094	7.25e-07	1.34e-06	-0.421698	0.746546	7.84094	2.52e-12	4.82e-12
BCCIP	0.0304247	1.02131	9.60355	0.117995	0.134574	0.317666	1.24631	9.60355	5.65e-40	4.06e-39	-0.325361	0.798099	9.60355	2.48e-47	1.17e-46
CHUK	-0.189608	0.876844	8.26474	2.04e-17	4.96e-17	0.317568	1.24623	8.26474	8.34e-30	4.21e-29	-0.0128132	0.991158	8.26474	0.633661	0.65886
QTRTD1	-0.204092	0.868085	9.79087	2.49e-31	9.39e-31	0.317489	1.24616	9.79087	1.71e-47	1.6e-46	0.00782635	1.00544	9.79087	0.713305	0.734745
THADA	-0.0939877	0.936929	7.61905	2.02e-06	3.15e-06	0.317366	1.24605	7.61905	2.15e-38	1.46e-37	-0.14842	0.902238	7.61905	2.75e-10	4.91e-10
GBP6	-0.383147	0.766763	9.94676	2.4e-32	9.46e-32	0.317329	1.24602	9.94676	1.78e-14	4.85e-14	0.262239	1.19934	9.94676	1.97e-11	3.65e-11
DNASE1L2	0.0250625	1.01752	8.14546	0.370361	0.398652	0.317277	1.24598	8.14546	1.14e-19	3.86e-19	-0.317402	0.802514	8.14546	5.01e-22	1.28e-21
FLVCR1	0.0688501	1.04888	10.1452	0.000740645	0.000999637	0.317007	1.24574	10.1452	4.11e-36	2.59e-35	-0.379343	0.768788	10.1452	8.35e-59	5.02e-58
PCCB	-0.311793	0.80564	8.93928	1.26e-31	4.82e-31	0.316943	1.24569	8.93928	9.65e-21	3.42e-20	0.161253	1.11826	8.93928	5.82e-07	9.18e-07
PSMD6	-0.171884	0.887683	11.6941	6.37e-18	1.58e-17	0.316653	1.24544	11.6941	4.22e-37	2.74e-36	-0.0371695	0.974565	11.6941	0.12136	0.139567
ERO1L	-0.148972	0.901893	9.25821	1.37e-11	2.67e-11	0.316308	1.24514	9.25821	1.38e-30	7.14e-30	-0.0693996	0.953035	9.25821	0.00857732	0.0108985
ZNF687	-0.0967731	0.935122	9.60702	1.75e-06	2.74e-06	0.316293	1.24513	9.60702	2.06e-36	1.31e-35	-0.143513	0.905312	9.60702	2.51e-09	4.34e-09
NOSIP	-0.330903	0.795039	11.2342	3.04e-50	2.11e-49	0.316164	1.24502	11.2342	1.18e-28	5.7e-28	0.189083	1.14004	11.2342	3.13e-12	5.95e-12
HSPBP1	-0.0885665	0.940457	10.8652	2.56e-05	3.77e-05	0.316157	1.24501	10.8652	9.85e-34	5.71e-33	-0.155045	0.898104	10.8652	5.57e-10	9.85e-10
PLRG1	-0.0758749	0.948767	9.89465	7.54e-05	0.000108295	0.316062	1.24493	9.89465	1.19e-40	8.81e-40	-0.172984	0.887006	9.89465	2.53e-14	5.17e-14
IAPP	-0.235884	0.849164	7.0556	3.88e-13	8.04e-13	0.315734	1.24464	7.0556	1.45e-14	3.96e-14	0.0545315	1.03852	7.0556	0.162083	0.184095
HMGA1	-0.121795	0.919044	10.1296	1.92e-07	3.14e-07	0.315662	1.24458	10.1296	3.03e-27	1.39e-26	-0.10742	0.928247	10.1296	0.00011959	0.000169444
TMEM186	-0.104244	0.930292	9.81476	6.05e-08	1.01e-07	0.315404	1.24436	9.81476	5.35e-40	3.86e-39	-0.132113	0.912494	9.81476	8.19e-09	1.39e-08
RPS16	-0.218566	0.85942	15.6379	3.46e-29	1.21e-28	0.315314	1.24428	15.6379	6.79e-38	4.53e-37	0.0303107	1.02123	15.6379	0.199863	0.224388
ECE2	-0.334088	0.793285	8.62213	1.71e-30	6.26e-30	0.3153	1.24427	8.62213	2e-17	6.19e-17	0.194373	1.14423	8.62213	3.34e-08	5.53e-08
SCAND1	-0.187013	0.878423	9.78719	1.09e-16	2.6e-16	0.31507	1.24407	9.78719	8.08e-29	3.93e-28	-0.0142795	0.990151	9.78719	0.598746	0.625476
TMEM98	-0.159112	0.895576	11.2197	8.19e-05	0.00011736	0.314751	1.2438	11.2197	6.33e-10	1.39e-09	-0.0536171	0.963518	11.2197	0.266355	0.294276
RNF168	-0.175529	0.885443	7.05622	2.15e-24	6.57e-24	0.314716	1.24377	7.05622	8.08e-49	7.91e-48	-0.0302728	0.979235	7.05622	0.146079	0.166736
AHSG	-0.389042	0.763637	7.72768	2e-11	3.88e-11	0.314682	1.24374	7.72768	1.93e-05	3.25e-05	0.27296	1.20828	7.72768	8.43e-05	0.000120221
VAPB	-0.135376	0.910433	9.63688	1.31e-10	2.47e-10	0.31459	1.24366	9.63688	4.3e-33	2.44e-32	-0.0871809	0.94136	9.63688	0.000544683	0.000746105
TFPT	-0.331772	0.79456	11.2139	3.06e-50	2.12e-49	0.314267	1.24338	11.2139	3.57e-28	1.69e-27	0.192002	1.14235	11.2139	1.64e-12	3.15e-12
MOCS3	-0.0951882	0.93615	7.70829	7.07e-06	1.07e-05	0.314026	1.24317	7.70829	8.6e-33	4.82e-32	-0.143749	0.905164	7.70829	1.18e-08	1.99e-08
HOXD11	-0.175526	0.885445	5.9866	2.11e-08	3.62e-08	0.313924	1.24308	5.9866	1.71e-15	4.87e-15	-0.0295741	0.979709	5.9866	0.430326	0.45978
C12orf49	-0.0812696	0.945225	8.73753	5.35e-05	7.75e-05	0.31392	1.24308	8.73753	2.2e-36	1.39e-35	-0.16342	0.892906	8.73753	7.53e-12	1.42e-11
ELP4	-0.342583	0.788628	9.53321	8.46e-63	9.19e-62	0.313906	1.24307	9.53321	1.43e-32	7.93e-32	0.207675	1.15483	9.53321	1.51e-16	3.3e-16
SPTY2D1	-0.314254	0.804267	7.75676	6.23e-47	3.91e-46	0.313815	1.24299	7.75676	2.84e-29	1.41e-28	0.167526	1.12313	7.75676	3.31e-10	5.9e-10
POLR2C	-0.141087	0.906836	10.6232	2.59e-12	5.19e-12	0.313772	1.24295	10.6232	7.45e-36	4.64e-35	-0.0783445	0.947144	10.6232	0.00118283	0.00158629
SAFB	-0.116826	0.922214	10.1022	2.91e-10	5.41e-10	0.313584	1.24279	10.1022	1.61e-42	1.28e-41	-0.112629	0.924901	10.1022	3.59e-07	5.73e-07
SYS1	-0.325985	0.797754	8.72186	1.05e-52	7.99e-52	0.313364	1.2426	8.72186	2.41e-30	1.24e-29	0.184585	1.13649	8.72186	1.52e-12	2.93e-12
TMEM108	0.0830808	1.05928	9.3395	0.0475417	0.0564217	0.313354	1.24259	9.3395	2.9e-09	6.16e-09	-0.396307	0.759801	9.3395	1.23e-15	2.62e-15
CPOX	-0.209917	0.864587	9.23843	4.76e-26	1.52e-25	0.312999	1.24229	9.23843	5.14e-36	3.23e-35	0.0200856	1.01402	9.23843	0.404192	0.433697
RBM38	-0.510384	0.702036	8.11456	3.52e-125	3.58e-123	0.312826	1.24214	8.11456	2.45e-27	1.13e-26	0.446923	1.36313	8.11456	2.06e-63	1.37e-62
DDX21	-0.1791	0.883254	10.7921	2.46e-12	4.94e-12	0.312663	1.242	10.7921	2.12e-22	8.03e-22	-0.0233776	0.983926	10.7921	0.446064	0.47546
LSM1	-0.148474	0.902204	12.318	2.75e-15	6.18e-15	0.312546	1.2419	12.318	8.25e-41	6.15e-40	-0.0667652	0.954776	12.318	0.00308902	0.00404158
RAD54L2	0.0233006	1.01628	10.6246	0.303647	0.330651	0.312496	1.24185	10.6246	1.19e-28	5.74e-28	-0.310652	0.806277	10.6246	8.17e-32	2.71e-31
SPAG6	0.0202369	1.01413	7.05277	0.656893	0.680937	0.312328	1.24171	7.05277	5.18e-08	1.02e-07	-0.306153	0.808796	7.05277	1.46e-08	2.46e-08
DPM1	-0.215179	0.861439	12.1818	4.05e-27	1.34e-26	0.312164	1.24157	12.1818	1.54e-35	9.52e-35	0.0282997	1.01981	12.1818	0.241719	0.268414
YIF1B	-0.284498	0.821027	9.4063	1.12e-45	6.62e-45	0.312056	1.24148	9.4063	2.59e-34	1.53e-33	0.126833	1.09189	9.4063	2.27e-07	3.64e-07
CLCN5	0.0819818	1.05847	7.35438	0.00131416	0.00174624	0.311856	1.2413	7.35438	1.3e-22	4.98e-22	-0.393415	0.761325	7.35438	4.54e-40	1.81e-39
ZNF20	-0.0526342	0.964174	7.58265	0.0086331	0.0108716	0.311707	1.24118	7.58265	3.05e-36	1.93e-35	-0.202119	0.869273	7.58265	1.29e-17	2.92e-17
FMR1NB	-0.353809	0.782515	6.5438	1.09e-19	2.86e-19	0.311327	1.24085	6.5438	3.4e-10	7.58e-10	0.225908	1.16951	6.5438	1.41e-06	2.19e-06
E2F4	-0.243969	0.844419	9.8777	9.76e-45	5.61e-44	0.311172	1.24072	9.8777	1.55e-45	1.37e-44	0.0700635	1.04976	9.8777	0.000992435	0.00133901
TCEAL3	-0.260218	0.834962	13.0899	9.5e-20	2.49e-19	0.311111	1.24066	13.0899	8.84e-18	2.78e-17	0.0931935	1.06673	13.0899	0.00685784	0.00877534
MFAP5	-1.03719	0.487274	8.06456	4.15e-49	2.78e-48	0.311107	1.24066	8.06456	0.000692255	0.0010442	1.19656	2.29192	8.06456	5.87e-46	2.68e-45
CNOT3	-0.0755026	0.949011	8.62477	9.43e-05	0.000134619	0.310824	1.24042	8.62477	1.26e-38	8.66e-38	-0.16886	0.889545	8.62477	1.7e-13	3.39e-13
CHID1	-0.305201	0.80933	10.5862	5.59e-40	2.78e-39	0.310555	1.24018	10.5862	4.92e-26	2.15e-25	0.157566	1.1154	10.5862	1.95e-08	3.26e-08
FAM19A5	-0.430892	0.741803	8.64737	1.6e-13	3.37e-13	0.310475	1.24012	8.64737	2.89e-05	4.82e-05	0.336126	1.26236	8.64737	1.52e-06	2.35e-06
KIF6	-0.31078	0.806206	6.10998	2.94e-32	1.15e-31	0.31037	1.24003	6.10998	1.92e-20	6.74e-20	0.165653	1.12167	6.10998	1.95e-07	3.15e-07
NPLOC4	-0.194568	0.873834	10.0512	9.46e-21	2.57e-20	0.310159	1.23984	10.0512	1.73e-32	9.57e-32	0.000812449	1.00056	10.0512	0.974213	0.977335
ATP5I	-0.330994	0.794989	13.1668	5.4e-51	3.85e-50	0.310076	1.23977	13.1668	5.81e-28	2.73e-27	0.194619	1.14442	13.1668	4.84e-13	9.5e-13
EFTUD2	-0.0884594	0.940527	13.4337	1.98e-06	3.09e-06	0.310065	1.23976	13.4337	1.81e-41	1.39e-40	-0.149786	0.901384	13.4337	1.2e-11	2.24e-11
TMED2	-0.128103	0.915034	11.3409	2.66e-08	4.54e-08	0.309663	1.23942	11.3409	5.02e-27	2.28e-26	-0.0931331	0.937485	11.3409	0.000714028	0.000971753
C11orf58	-0.151218	0.90049	13.1948	1.24e-12	2.52e-12	0.309608	1.23937	13.1948	2.58e-31	1.37e-30	-0.0602589	0.959092	13.1948	0.018312	0.0226417
CYB5R4	-0.111549	0.925594	10.0573	1.31e-06	2.06e-06	0.309569	1.23934	10.0573	5.18e-27	2.35e-26	-0.116557	0.922387	10.0573	2.24e-05	3.29e-05
MRPL22	-0.156581	0.897149	12.3662	3.49e-16	8.12e-16	0.30939	1.23918	12.3662	3.08e-38	2.08e-37	-0.0524496	0.964298	12.3662	0.0230807	0.0283353
ADD2	0.315208	1.24419	9.05746	4.58e-31	1.72e-30	0.30933	1.23913	9.05746	4.44e-19	1.47e-18	-0.722368	0.606102	9.05746	8.82e-124	1.83e-122
OPA1	-0.0615494	0.958234	10.2932	0.000430585	0.000588769	0.30928	1.23909	10.2932	6.21e-47	5.72e-46	-0.187303	0.878246	10.2932	1.07e-19	2.56e-19
MGAT2	-0.32119	0.800409	10.3318	3.58e-56	3.09e-55	0.309263	1.23907	10.3318	2.44e-32	1.35e-31	0.18142	1.134	10.3318	3.4e-13	6.7e-13
CKLF	-0.495908	0.709115	9.85473	5.78e-111	3.24e-109	0.309189	1.23901	9.85473	1.56e-25	6.68e-25	0.429597	1.34686	9.85473	1.45e-55	8.15e-55
HAX1	-0.187239	0.878285	12.0633	1.5e-22	4.3e-22	0.309141	1.23897	12.0633	5.21e-38	3.5e-37	-0.00869219	0.993993	12.0633	0.707329	0.729043
UBE2Q1	-0.078131	0.947284	10.2003	3.02e-05	4.43e-05	0.309091	1.23893	10.2003	1.07e-40	7.98e-40	-0.163588	0.892802	10.2003	1.72e-13	3.43e-13
THOC1	0.0389872	1.02739	9.50487	0.0907009	0.104692	0.308954	1.23881	9.50487	4.42e-27	2.02e-26	-0.329782	0.795656	9.50487	1.37e-34	4.86e-34
ZNF678	0.162062	1.11889	8.01175	1.28e-09	2.31e-09	0.308916	1.23878	8.01175	3.13e-20	1.09e-19	-0.504524	0.704893	8.01175	2.17e-60	1.36e-59
SYCE1	-0.185184	0.879537	6.51241	0.00256726	0.00333894	0.308814	1.23869	6.51241	6.87e-05	0.000112106	-0.0113197	0.992185	6.51241	0.877237	0.887349
DVL3	-0.105466	0.929505	9.46039	8.45e-07	1.34e-06	0.308783	1.23866	9.46039	4.9e-31	2.57e-30	-0.124497	0.917324	9.46039	1.07e-06	1.67e-06
C7orf49	-0.124876	0.917083	9.32035	3.61e-07	5.84e-07	0.30869	1.23858	9.32035	8.6e-24	3.45e-23	-0.0968507	0.935072	9.32035	0.000950891	0.00128475
RLN1	-0.16023	0.894882	6.29249	1.85e-11	3.61e-11	0.308687	1.23858	6.29249	5.41e-25	2.27e-24	-0.0466433	0.968186	6.29249	0.102923	0.119347
ATP11C	-0.14525	0.904222	8.79898	1.4e-12	2.83e-12	0.307869	1.23788	8.79898	2.24e-33	1.28e-32	-0.0671885	0.954496	8.79898	0.00627589	0.00805648
SPTLC2	-0.302816	0.810668	8.41677	1.31e-51	9.59e-51	0.307561	1.23761	8.41677	3.78e-33	2.14e-32	0.156839	1.11484	8.41677	1.61e-10	2.9e-10
PIGX	0.0290734	1.02036	9.72956	0.189703	0.211526	0.307498	1.23756	9.72956	5.97e-29	2.91e-28	-0.314411	0.804179	9.72956	5.42e-34	1.9e-33
GADD45GIP1	-0.270707	0.828913	11.9246	2.83e-44	1.6e-43	0.307422	1.23749	11.9246	1.15e-35	7.16e-35	0.111366	1.08025	11.9246	2.6e-06	3.97e-06
NFXL1	0.0536008	1.03785	8.00918	0.0427226	0.0509059	0.307395	1.23747	8.00918	1.39e-20	4.91e-20	-0.34915	0.785047	8.00918	1.74e-29	5.42e-29
DCUN1D1	-0.0419018	0.971374	9.13964	0.0361082	0.0433365	0.307165	1.23727	9.13964	2.17e-35	1.34e-34	-0.213326	0.862547	9.13964	1.37e-19	3.28e-19
ZNF610	0.148599	1.10849	8.4319	8.78e-08	1.46e-07	0.306901	1.23705	8.4319	1.36e-18	4.41e-18	-0.483615	0.715184	8.4319	4.56e-51	2.33e-50
WDR3	-0.0579721	0.960613	10.6084	0.00866264	0.0109053	0.306839	1.23699	10.6084	5.28e-29	2.58e-28	-0.190215	0.876475	10.6084	3.43e-13	6.76e-13
ARL6IP6	0.21875	1.16373	11.2569	7.46e-15	1.65e-14	0.306678	1.23686	11.2569	5.63e-18	1.78e-17	-0.583037	0.667557	11.2569	6.07e-73	4.84e-72
ZDHHC9	-0.0402453	0.97249	9.05729	0.06004	0.0705532	0.306676	1.23685	9.05729	7.65e-31	3.98e-30	-0.215243	0.861401	9.05729	1.53e-17	3.45e-17
HADH	-0.226548	0.854678	10.7531	4.83e-28	1.63e-27	0.306655	1.23684	10.7531	4.73e-32	2.58e-31	0.0493372	1.03479	10.7531	0.0485035	0.0579544
EIF4G1	-0.268392	0.830245	11.2948	9.34e-37	4.22e-36	0.306595	1.23679	11.2948	4.62e-30	2.35e-29	0.108811	1.07834	11.2948	2.43e-05	3.56e-05
UBL4A	-0.180061	0.882666	8.57001	3.17e-18	7.95e-18	0.306478	1.23669	8.57001	2.85e-32	1.57e-31	-0.0165205	0.988614	8.57001	0.507345	0.536331
BRCC3	-0.118188	0.921344	10.2272	1.76e-11	3.44e-11	0.306468	1.23668	10.2272	3.97e-45	3.44e-44	-0.104375	0.930208	10.2272	6.75e-07	1.06e-06
HUWE1	-0.150301	0.901062	10.4538	8.05e-14	1.71e-13	0.306386	1.23661	10.4538	2.95e-34	1.74e-33	-0.058699	0.96013	10.4538	0.0150826	0.0187871
CACNG4	0.350433	1.27494	10.5138	4.76e-25	1.48e-24	0.306038	1.23631	10.5138	1.42e-12	3.55e-12	-0.769467	0.586634	10.5138	1.39e-87	1.45e-86
RBM22	-0.197322	0.872168	9.70795	8.56e-12	1.69e-11	0.305547	1.23589	9.70795	4.8e-17	1.46e-16	0.00881892	1.00613	9.70795	0.799187	0.814714
ZNF358	-0.0990061	0.933676	9.46716	3.05e-05	4.48e-05	0.305518	1.23586	9.46716	6.57e-25	2.74e-24	-0.130771	0.913343	9.46716	3.76e-06	5.72e-06
PSMD8	-0.170129	0.888763	10.5113	1.46e-27	4.87e-27	0.305473	1.23582	10.5113	8.68e-56	1.05e-54	-0.0297313	0.979603	10.5113	0.116682	0.134454
RAE1	0.0957484	1.06862	10.5435	1.38e-05	2.07e-05	0.305346	1.23572	10.5435	9.01e-29	4.37e-28	-0.407183	0.754095	10.5435	5.64e-58	3.34e-57
MRPS22	-0.284903	0.820797	11.0661	7.81e-61	7.9e-60	0.305099	1.2355	11.0661	3.53e-43	2.89e-42	0.133588	1.09702	11.0661	3.76e-10	6.7e-10
RBP4	-0.998255	0.500605	6.78918	1.88e-33	7.7e-33	0.305098	1.2355	6.78918	0.00428706	0.00600956	1.1466	2.21391	6.78918	4.14e-31	1.35e-30
RPS15A	-0.207667	0.865936	14.2606	3.78e-17	9.11e-17	0.305042	1.23545	14.2606	9.51e-23	3.66e-22	0.0239576	1.01674	14.2606	0.419731	0.449496
NR2F6	-0.0427458	0.970806	9.27108	0.0945648	0.109	0.304824	1.23527	9.27108	1.3e-21	4.79e-21	-0.210048	0.864509	9.27108	3.94e-12	7.48e-12
ZNF281	0.00894162	1.00622	11.2607	0.697054	0.719093	0.304761	1.23521	11.2607	1.45e-26	6.47e-26	-0.283391	0.821657	11.2607	6.95e-26	1.97e-25
PGGT1B	-0.144233	0.90486	7.28959	6.29e-10	1.15e-09	0.304671	1.23514	7.28959	1.72e-25	7.35e-25	-0.0657937	0.95542	7.28959	0.0184906	0.0228552
KDELR1	-0.302424	0.810889	10.446	6.53e-46	3.92e-45	0.30465	1.23512	10.446	3.71e-29	1.82e-28	0.158868	1.11641	10.446	9.14e-10	1.6e-09
TSFM	-0.00428201	0.997036	12.5531	0.866728	0.878868	0.304643	1.23511	12.5531	1.09e-21	4.03e-21	-0.264508	0.832482	12.5531	1.4e-18	3.27e-18
METTL1	-0.300643	0.811891	9.33029	3.94e-24	1.19e-23	0.304484	1.23498	9.33029	6.89e-16	2e-15	0.156485	1.11457	9.33029	1.23e-05	1.82e-05
MYEF2	0.361527	1.28479	10.7089	4.55e-37	2.08e-36	0.304421	1.23492	10.7089	6.27e-17	1.91e-16	-0.783785	0.580841	10.7089	6.59e-134	1.7e-132
FXYD7	-0.081522	0.94506	8.08855	0.0387656	0.0463721	0.304308	1.23483	8.08855	8.75e-10	1.91e-09	-0.154525	0.898428	8.08855	0.000999943	0.00134898
CACNA1F	-0.153168	0.899273	6.9887	8.33e-10	1.52e-09	0.304222	1.23475	6.9887	2.44e-22	9.23e-22	-0.0527049	0.964127	6.9887	0.0777818	0.0912167
NUFIP1	-0.0589093	0.95999	7.48136	0.00189719	0.00248925	0.304151	1.23469	7.48136	1.7e-38	1.16e-37	-0.186496	0.878737	7.48136	8.6e-17	1.89e-16
NTN1	-0.162348	0.893569	6.58722	1.98e-08	3.39e-08	0.30415	1.23469	6.58722	6.05e-17	1.84e-16	-0.0396052	0.972921	6.58722	0.252507	0.279655
FAM120AOS	-0.26346	0.833087	10.0561	8.04e-54	6.35e-53	0.304114	1.23466	10.0561	1.24e-44	1.06e-43	0.104012	1.07476	10.0561	6.96e-07	1.09e-06
MAPKAP1	-0.175255	0.885611	8.49879	9.13e-18	2.25e-17	0.304079	1.23463	8.49879	1.26e-32	7.01e-32	-0.0212144	0.985403	8.49879	0.388215	0.417753
TRAP1	-0.056798	0.961396	10.9785	0.01064	0.0133092	0.303838	1.23442	10.9785	4.47e-28	2.11e-27	-0.189216	0.877082	10.9785	6.59e-13	1.29e-12
IFT122	-0.194361	0.87396	9.49086	7.74e-20	2.04e-19	0.303786	1.23438	9.49086	8e-30	4.05e-29	0.00617804	1.00429	9.49086	0.810113	0.824781
POU2F2	-0.00651554	0.995494	8.84076	0.841247	0.855089	0.303755	1.23435	8.84076	9.74e-14	2.57e-13	-0.260548	0.834771	8.84076	1.32e-11	2.47e-11
EFCAB4A	-0.313004	0.804964	9.87486	3.82e-21	1.05e-20	0.30366	1.23427	9.87486	5.92e-13	1.5e-12	0.174772	1.12879	9.87486	1.2e-05	1.78e-05
ZSCAN29	-0.0851355	0.942696	8.92085	6.78e-08	1.13e-07	0.303549	1.23418	8.92085	1.53e-55	1.83e-54	-0.148719	0.902051	8.92085	1.86e-15	3.94e-15
ALKBH7	-0.238655	0.847535	11.5728	2.47e-32	9.71e-32	0.303437	1.23408	11.5728	1.09e-32	6.07e-32	0.0693884	1.04927	11.5728	0.00459727	0.00594908
ZNF668	-0.163186	0.893051	8.94915	3.29e-17	7.95e-17	0.303325	1.23398	8.94915	3.7e-36	2.33e-35	-0.0376835	0.974218	8.94915	0.105537	0.122158
CLPTM1L	-0.238826	0.847434	12.0823	1.68e-34	7.06e-34	0.303236	1.23391	12.0823	8.69e-35	5.22e-34	0.0698109	1.04958	12.0823	0.00323637	0.0042272
COQ7	0.0129067	1.00899	9.6222	0.4685	0.497446	0.303208	1.23388	9.6222	1.39e-43	1.15e-42	-0.287643	0.81924	9.6222	3.61e-44	1.59e-43
CBX3	0.0153173	1.01067	10.7968	0.417504	0.446326	0.302992	1.2337	10.7968	1.32e-38	9.03e-38	-0.290874	0.817406	10.7968	4.56e-40	1.82e-39
FIGN	-0.186069	0.878997	6.80206	9.87e-08	1.64e-07	0.302894	1.23362	6.80206	6.01e-12	1.45e-11	-0.00480397	0.996676	6.80206	0.908455	0.917165
RQCD1	-0.00611594	0.99577	8.85964	0.739749	0.759485	0.302768	1.23351	8.85964	1.3e-40	9.65e-40	-0.260238	0.83495	8.85964	8.84e-34	3.07e-33
METAP1	-0.116935	0.922145	9.96806	8.08e-10	1.47e-09	0.302749	1.23349	9.96806	1.45e-37	9.55e-37	-0.102851	0.931191	9.96806	6.1e-06	9.17e-06
ACP1	0.0864579	1.06176	9.8663	1.85e-05	2.74e-05	0.302733	1.23348	9.8663	1.38e-33	7.95e-33	-0.391669	0.762247	9.8663	3.54e-64	2.39e-63
ZNF574	-0.181269	0.881927	9.88783	7.85e-21	2.14e-20	0.302572	1.23334	9.88783	9.64e-36	5.99e-35	-0.0113349	0.992174	9.88783	0.627622	0.652991
CLDN15	-0.241247	0.846013	8.45593	2.68e-29	9.42e-29	0.302475	1.23326	8.45593	8.11e-29	3.94e-28	0.0739247	1.05258	8.45593	0.00450112	0.00582921
DSG2	-0.278806	0.824273	5.97554	4.67e-21	1.28e-20	0.302469	1.23325	5.97554	8.18e-16	2.36e-15	0.127265	1.09222	5.97554	0.000360109	0.000497809
PLCB3	-0.133559	0.91158	8.43713	9.47e-06	1.43e-05	0.302272	1.23308	8.43713	1.49e-15	4.25e-15	-0.0788194	0.946832	8.43713	0.0286158	0.0348902
PPFIA1	-0.127147	0.91564	9.34793	7.28e-09	1.28e-08	0.302092	1.23293	9.34793	3.52e-28	1.67e-27	-0.0877653	0.940979	9.34793	0.000838244	0.0011364
HOOK1	0.234687	1.17665	8.5262	7.83e-15	1.73e-14	0.302068	1.23291	8.5262	2.53e-15	7.18e-15	-0.601573	0.659035	8.5262	5.28e-67	3.77e-66
GSTO1	-0.697647	0.616577	12.0739	2.63e-101	1.06e-99	0.301988	1.23284	12.0739	5.07e-12	1.23e-11	0.722476	1.65001	12.0739	1.96e-74	1.61e-73
UTP14A	-0.084279	0.943256	8.89221	2.32e-06	3.62e-06	0.301968	1.23282	8.89221	9.3e-43	7.48e-42	-0.148531	0.902169	8.89221	2.34e-12	4.48e-12
COX7A2L	0.0464166	1.0327	11.7704	0.0584343	0.0687711	0.301965	1.23282	11.7704	5.66e-23	2.2e-22	-0.334125	0.793265	11.7704	2.25e-31	7.39e-31
IGSF22	-0.252465	0.839461	7.21271	8.68e-28	2.92e-27	0.301913	1.23278	7.21271	6.09e-25	2.55e-24	0.0903526	1.06463	7.21271	0.00123725	0.00165639
CDC27	-0.140517	0.907194	10.8604	2.63e-10	4.9e-10	0.301796	1.23268	10.8604	1.9e-27	8.78e-27	-0.0685162	0.953618	10.8604	0.0100768	0.0127465
LRRC42	0.0164858	1.01149	9.90255	0.48916	0.518053	0.301623	1.23253	9.90255	3.07e-24	1.25e-23	-0.291317	0.817156	9.90255	2.06e-25	5.78e-25
PSMA1	-0.165739	0.891472	12.6335	1.01e-14	2.23e-14	0.30154	1.23246	12.6335	2.57e-29	1.28e-28	-0.0324719	0.977744	12.6335	0.207127	0.232093
SF3A3	-0.145078	0.90433	11.9919	4.18e-19	1.07e-18	0.301439	1.23237	11.9919	9.24e-51	9.6e-50	-0.0617228	0.958119	11.9919	0.00159465	0.00212236
AASDH	-0.0554709	0.96228	8.11867	0.0109758	0.0137099	0.301171	1.23214	8.11867	1.16e-28	5.59e-28	-0.188733	0.877376	8.11867	2.64e-13	5.22e-13
VAX2	-0.180249	0.882551	6.60035	8.36e-09	1.46e-08	0.300911	1.23192	6.60035	2.28e-14	6.19e-14	-0.0113088	0.992192	6.60035	0.762751	0.780265
PHF5A	-0.0269512	0.981492	10.0338	0.233553	0.257741	0.300892	1.23191	10.0338	1.12e-26	5.04e-26	-0.228984	0.853235	10.0338	9.27e-18	2.1e-17
PQBP1	-0.125807	0.916492	10.8809	1.59e-09	2.87e-09	0.300833	1.23186	10.8809	5.61e-31	2.94e-30	-0.0885512	0.940467	10.8809	0.000382113	0.000527346
SLC3A2	-0.416998	0.748981	11.0752	9.28e-77	1.7e-75	0.300757	1.23179	11.0752	1.55e-24	6.42e-24	0.325029	1.25269	11.0752	4.87e-32	1.62e-31
TRPT1	-0.32798	0.796651	11.1129	3.15e-56	2.72e-55	0.299926	1.23108	11.1129	3.01e-29	1.49e-28	0.199354	1.14818	11.1129	4.33e-15	9.05e-15
UBQLN4	-0.0174642	0.987968	7.8704	0.494291	0.523056	0.299651	1.23085	7.8704	5.82e-21	2.08e-20	-0.241355	0.845951	7.8704	1.24e-15	2.64e-15
EIF2S2	0.105154	1.07561	8.91191	2.38e-05	3.5e-05	0.299554	1.23076	8.91191	6.3e-22	2.35e-21	-0.415395	0.749814	8.91191	5.5e-47	2.57e-46
TSG101	-0.0536366	0.963505	12.939	0.0129883	0.0161507	0.299503	1.23072	12.939	6.48e-29	3.16e-28	-0.189856	0.876693	12.939	1.08e-13	2.15e-13
SPERT	-0.187123	0.878356	5.44989	3.25e-15	7.28e-15	0.29943	1.23066	5.44989	1.14e-23	4.53e-23	-0.000231268	0.99984	5.44989	0.993537	0.994137
PMM2	-0.345933	0.786799	9.01118	3.43e-54	2.74e-53	0.29936	1.2306	9.01118	2.21e-25	9.43e-25	0.225352	1.16906	9.01118	1.36e-16	2.98e-16
CA14	-0.141155	0.906793	7.45462	1.7e-05	2.52e-05	0.299345	1.23059	7.45462	4.18e-13	1.07e-12	-0.0654335	0.955658	7.45462	0.0950299	0.110626
SSR3	-0.417455	0.748744	8.91469	7.06e-97	2.43e-95	0.299276	1.23053	8.91469	8.42e-30	4.25e-29	0.326994	1.2544	8.91469	5.62e-40	2.24e-39
EPB41	0.0211328	1.01476	7.24434	0.339998	0.367746	0.299202	1.23046	7.24434	1.67e-27	7.73e-27	-0.295766	0.81464	7.24434	3.41e-30	1.08e-29
PNMA6A	0.00526104	1.00365	8.04647	0.902023	0.911302	0.299132	1.2304	8.04647	2.69e-08	5.4e-08	-0.273165	0.827502	8.04647	7.18e-08	1.18e-07
HDDC3	-0.36526	0.776329	9.7318	2.33e-71	3.48e-70	0.299049	1.23033	9.7318	2.21e-29	1.1e-28	0.253074	1.19174	9.7318	7.58e-24	2.04e-23
XDH	-0.188445	0.877551	6.63995	4.9e-08	8.25e-08	0.298977	1.23027	6.63995	6.8e-12	1.64e-11	0.00204896	1.00142	6.63995	0.960473	0.965034
TEX12	-0.239586	0.846989	5.51268	8.89e-10	1.62e-09	0.298705	1.23004	5.51268	1.53e-09	3.29e-09	0.0749127	1.0533	5.51268	0.109632	0.126695
TUFM	-0.0570937	0.961199	13.5864	0.00322694	0.00417348	0.29848	1.22985	13.5864	1.67e-35	1.03e-34	-0.184038	0.880236	13.5864	9.63e-16	2.05e-15
UCKL1	-0.0272752	0.981272	9.54582	0.176968	0.197973	0.298061	1.22949	9.54582	1.1e-32	6.11e-32	-0.22601	0.854996	9.54582	1.92e-21	4.84e-21
FERD3L	-0.187845	0.877916	6.69303	1.89e-08	3.24e-08	0.297961	1.22941	6.69303	1.53e-12	3.82e-12	0.0020984	1.00146	6.69303	0.958159	0.963148
FDFT1	-0.133444	0.911653	11.5292	2.36e-05	3.47e-05	0.297729	1.22921	11.5292	6.29e-14	1.67e-13	-0.0749485	0.949376	11.5292	0.046727	0.0558901
SEC22A	-0.20655	0.866607	9.60141	2.32e-33	9.43e-33	0.29768	1.22917	9.60141	2.28e-43	1.87e-42	0.0289103	1.02024	9.60141	0.166115	0.188416
PYY	-0.243576	0.844649	7.68578	4.88e-18	1.21e-17	0.297513	1.22902	7.68578	6.51e-17	1.98e-16	0.0816388	1.05822	7.68578	0.0159302	0.0198046
ATF5	-0.603502	0.658154	8.55367	3.98e-78	7.61e-77	0.297269	1.22882	8.55367	2.89e-12	7.1e-12	0.592975	1.50835	8.55367	5.61e-52	2.91e-51
CGRRF1	-0.0609928	0.958604	9.6634	0.00523456	0.00667606	0.296942	1.22854	9.6634	8.72e-28	4.07e-27	-0.177135	0.884458	9.6634	7.72e-12	1.45e-11
CXXC1	-0.168811	0.889576	10.5585	1e-16	2.38e-16	0.296775	1.2284	10.5585	2.08e-31	1.11e-30	-0.0238782	0.983585	10.5585	0.329007	0.357964
PNKP	-0.321101	0.800459	8.65512	4.95e-50	3.41e-49	0.29659	1.22824	8.65512	1.02e-26	4.57e-26	0.192549	1.14278	8.65512	2.74e-13	5.42e-13
INTS5	-0.227911	0.853871	8.20236	7.29e-23	2.12e-22	0.2963	1.22799	8.20236	4.09e-24	1.66e-23	0.0604697	1.04281	8.20236	0.0305616	0.0371571
RPS6KB1	0.0394963	1.02775	10.6087	0.092723	0.106941	0.29625	1.22795	10.6087	4.63e-24	1.87e-23	-0.319222	0.801502	10.6087	3.18e-31	1.04e-30
COPS7B	-0.0272818	0.981267	8.57211	0.162035	0.181972	0.296244	1.22794	8.57211	1.35e-34	8.08e-34	-0.224387	0.855959	8.57211	1.34e-22	3.5e-22
ENPP5	-0.355166	0.78178	6.89421	2.82e-13	5.88e-13	0.295951	1.22769	6.89421	1.66e-06	3e-06	0.241492	1.18221	6.89421	3.39e-05	4.93e-05
AIFM1	-0.342645	0.788594	9.92359	3.02e-81	6.35e-80	0.295722	1.2275	9.92359	9.91e-37	6.35e-36	0.223914	1.1679	9.92359	6.38e-24	1.72e-23
CRKL	-0.0341322	0.976619	8.34742	0.0616434	0.0723347	0.295549	1.22735	8.34742	2.81e-39	1.97e-38	-0.214042	0.862119	8.34742	2.03e-23	5.38e-23
FLJ37201	0.22777	1.17102	6.81387	3.8e-13	7.89e-13	0.295509	1.22732	6.81387	9e-14	2.38e-13	-0.585924	0.666222	6.81387	1.11e-58	6.68e-58
NOB1	-0.310122	0.806573	9.31407	7.9e-59	7.45e-58	0.295491	1.2273	9.31407	4.32e-33	2.45e-32	0.177935	1.13126	9.31407	3.95e-14	8.03e-14
SLC25A22	-0.202622	0.86897	10.9218	6.7e-13	1.37e-12	0.295475	1.22729	10.9218	9.77e-17	2.94e-16	0.0252914	1.01769	10.9218	0.454997	0.484752
WWC1	-0.221639	0.85759	7.1046	5.52e-21	1.51e-20	0.295309	1.22715	7.1046	3.48e-23	1.36e-22	0.0524445	1.03702	7.1046	0.0652552	0.0769941
KCNH7	-0.0178878	0.987678	6.47561	0.481816	0.510695	0.294931	1.22683	6.47561	1.6e-20	5.63e-20	-0.236561	0.848766	6.47561	3.38e-15	7.09e-15
GTPBP10	-0.144842	0.904478	9.79847	1.04e-11	2.05e-11	0.294926	1.22682	9.79847	1.72e-28	8.25e-28	-0.056272	0.961746	9.79847	0.027539	0.0336197
ZBTB8OS	-0.206592	0.866582	10.3447	1.13e-22	3.25e-22	0.294858	1.22676	10.3447	1.18e-28	5.71e-28	0.0314776	1.02206	10.3447	0.216447	0.241812
GNL3L	0.0711757	1.05057	10.454	0.00529005	0.00674533	0.294657	1.22659	10.454	2.62e-20	9.15e-20	-0.362794	0.777657	10.454	4.35e-34	1.53e-33
MAPRE1	-0.0727648	0.950814	11.9272	7.99e-05	0.000114619	0.294645	1.22658	11.9272	3.96e-38	2.67e-37	-0.158378	0.896032	11.9272	4.38e-13	8.61e-13
SSR2	-0.200424	0.870295	12.7894	2.31e-19	6e-19	0.29442	1.22639	12.7894	8.94e-26	3.86e-25	0.0231067	1.01615	12.7894	0.389552	0.419153
XRN2	0.0854331	1.06101	10.6216	0.000945373	0.00126666	0.294384	1.22636	10.6216	8.69e-20	2.96e-19	-0.382797	0.766949	10.6216	5.61e-37	2.08e-36
ATRNL1	0.27505	1.21004	7.66406	3.02e-17	7.31e-17	0.29438	1.22636	7.66406	1.02e-12	2.56e-12	-0.652063	0.63637	7.66406	1.58e-67	1.14e-66
TIGD1	0.04947	1.03488	8.61881	0.0209878	0.0256789	0.294351	1.22633	8.61881	2.29e-28	1.09e-27	-0.331698	0.794601	8.61881	1.95e-40	7.86e-40
JPH1	-0.121059	0.919513	6.11441	1.04e-07	1.72e-07	0.294013	1.22605	6.11441	4.93e-25	2.07e-24	-0.0892357	0.940021	6.11441	0.00102933	0.001387
VPS72	0.0707044	1.05023	12.0264	0.00042777	0.000585059	0.29398	1.22602	12.0264	4.09e-32	2.24e-31	-0.361523	0.778342	12.0264	5e-55	2.77e-54
DDHD1	-0.174118	0.886309	7.55607	2.87e-23	8.48e-23	0.293788	1.22585	7.55607	4.92e-41	3.7e-40	-0.0136871	0.990558	7.55607	0.518118	0.546921
EXOSC1	-0.167802	0.890198	11.3445	2.25e-21	6.23e-21	0.293738	1.22581	11.3445	2.12e-40	1.55e-39	-0.022613	0.984448	11.3445	0.289249	0.31754
SNX11	-0.239145	0.847247	9.31608	1.89e-24	5.79e-24	0.293715	1.22579	9.31608	4.03e-23	1.58e-22	0.0787204	1.05608	9.31608	0.0054383	0.00700454
G3BP2	-0.164332	0.892342	9.13232	1.86e-15	4.22e-15	0.293669	1.22575	9.13232	8.06e-30	4.07e-29	-0.0274788	0.981133	9.13232	0.26887	0.296744
COPZ1	-0.0717399	0.95149	11.1289	0.000122693	0.000173969	0.293514	1.22562	11.1289	6.56e-37	4.23e-36	-0.158829	0.895752	11.1289	7.31e-13	1.43e-12
ARAF	-0.545909	0.68496	8.47956	2.28e-121	1.94e-119	0.293488	1.2256	8.47956	1.02e-20	3.61e-20	0.514546	1.42854	8.47956	4.34e-72	3.4e-71
DHODH	-0.229603	0.85287	8.93325	2.07e-27	6.9e-27	0.293465	1.22558	8.93325	5.44e-28	2.56e-27	0.0653911	1.04637	8.93325	0.0107407	0.0135581
ERCC4	-0.115106	0.923315	6.71732	1.1e-10	2.08e-10	0.293137	1.2253	6.71732	4.65e-40	3.37e-39	-0.0969107	0.935033	6.71732	5.5e-06	8.29e-06
ZNF570	-0.0456666	0.968842	7.72276	0.00963598	0.0120833	0.292968	1.22516	7.72276	2.41e-41	1.84e-40	-0.195369	0.87335	7.72276	5.27e-21	1.31e-20
DHX8	-0.149643	0.901474	10.8277	2.57e-14	5.58e-14	0.292955	1.22515	10.8277	7.4e-33	4.16e-32	-0.0477041	0.967475	10.8277	0.043164	0.0518102
KIAA1429	-0.0889491	0.940207	8.05908	2.21e-05	3.26e-05	0.292903	1.2251	8.05908	3.16e-29	1.56e-28	-0.133847	0.911398	8.05908	8.05e-08	1.32e-07
SRPK1	0.254373	1.19282	12.5278	1.56e-24	4.77e-24	0.292901	1.2251	12.5278	1.61e-20	5.67e-20	-0.621386	0.650046	12.5278	1.76e-108	2.73e-107
RCOR1	-0.186413	0.878788	7.16218	1.09e-33	4.5e-33	0.292761	1.22498	7.16218	3.11e-52	3.38e-51	0.00468436	1.00325	7.16218	0.802764	0.817874
VPS4A	-0.135616	0.910281	9.42856	4.95e-15	1.1e-14	0.292681	1.22491	9.42856	3.99e-42	3.14e-41	-0.0673798	0.95437	9.42856	0.00119588	0.00160304
SLMO2	0.0386109	1.02712	10.875	0.0851829	0.0985786	0.292561	1.22481	10.875	1.12e-25	4.8e-25	-0.314687	0.804025	10.875	2.94e-33	1.01e-32
PAF1	-0.201844	0.869438	10.4681	9.08e-33	3.62e-32	0.29235	1.22463	10.4681	5.21e-43	4.23e-42	0.0269624	1.01886	10.4681	0.190325	0.214178
FAM32A	-0.0939733	0.936939	11.3555	1.84e-05	2.73e-05	0.292265	1.22456	11.3555	1.24e-26	5.54e-26	-0.126146	0.916276	11.3555	1.38e-06	2.14e-06
COQ3	0.0777478	1.05537	8.92767	0.000110159	0.000156599	0.292154	1.22447	8.92767	1.34e-31	7.2e-31	-0.369903	0.773834	8.92767	1.76e-57	1.03e-56
THOP1	-0.105169	0.929696	12.8153	5.84e-08	9.81e-08	0.292032	1.22436	12.8153	8.98e-34	5.22e-33	-0.11004	0.926562	12.8153	1.96e-06	3.02e-06
GNAS	0.096285	1.06902	12.218	0.0400315	0.047837	0.291937	1.22428	12.218	7.88e-07	1.46e-06	-0.396034	0.759944	12.218	9.61e-13	1.87e-12
MBD4	-0.239891	0.846809	10.0872	1.02e-35	4.43e-35	0.291867	1.22422	10.0872	4.34e-33	2.46e-32	0.0814203	1.05806	10.0872	0.000500336	0.000686413
KEAP1	-0.197763	0.871902	11.068	5.74e-27	1.89e-26	0.291773	1.22414	11.068	1.53e-36	9.72e-36	0.0216783	1.01514	11.068	0.330608	0.359538
NCOA5	-0.00890418	0.993847	8.55903	0.648165	0.672733	0.291679	1.22406	8.55903	1.48e-33	8.52e-33	-0.24643	0.84298	8.55903	4.45e-27	1.3e-26
POLR1E	-0.00603584	0.995825	7.99161	0.791394	0.808423	0.291545	1.22395	7.99161	1.08e-24	4.49e-24	-0.250383	0.840673	7.99161	1.12e-20	2.77e-20
MYNN	-0.0179525	0.987633	9.58754	0.403317	0.431838	0.291492	1.22391	9.58754	9.61e-28	4.48e-27	-0.233414	0.85062	9.58754	2.7e-20	6.61e-20
USP39	-0.0767123	0.948216	12.8639	3.85e-06	5.93e-06	0.291398	1.22383	12.8639	4.85e-46	4.33e-45	-0.149888	0.90132	12.8639	2.65e-14	5.39e-14
C9orf64	-0.04267	0.970857	8.16915	0.0830016	0.0961985	0.291071	1.22355	8.16915	2.8e-21	1.01e-20	-0.197939	0.871795	8.16915	1.12e-11	2.09e-11
PPM1A	0.057268	1.04049	8.73378	0.00449788	0.00575806	0.291058	1.22354	8.73378	2.89e-31	1.53e-30	-0.339847	0.790125	8.73378	4.46e-48	2.13e-47
COG1	-0.0892777	0.939993	11.2274	0.000186909	0.00026169	0.290837	1.22335	11.2274	2.06e-22	7.85e-22	-0.131546	0.912853	11.2274	3.75e-06	5.71e-06
MINPP1	0.158561	1.11617	9.54545	3.73e-09	6.61e-09	0.2904	1.22298	9.54545	8.86e-18	2.78e-17	-0.483106	0.715436	9.54545	2.3e-54	1.26e-53
SLC20A1	-0.251411	0.840075	10.639	3.21e-33	1.3e-32	0.290384	1.22297	10.639	8.24e-28	3.86e-27	0.0990959	1.0711	10.639	9.66e-05	0.000137387
LRRN2	-0.176155	0.885059	9.79758	1.55e-09	2.79e-09	0.290282	1.22288	9.79758	2.79e-15	7.89e-15	-0.00768109	0.99469	9.79758	0.826011	0.83986
ABCE1	-0.0357979	0.975492	9.7066	0.0754794	0.0878495	0.290213	1.22282	9.7066	3.45e-31	1.82e-30	-0.206936	0.866375	9.7066	2.93e-18	6.77e-18
PRRC1	-0.18926	0.877055	9.70062	6.36e-31	2.37e-30	0.290128	1.22275	9.70062	1.81e-45	1.59e-44	0.0110665	1.0077	9.70062	0.577839	0.605201
CAPRIN1	0.0963803	1.06909	10.4532	0.000521602	0.000709621	0.290049	1.22268	10.4532	8.36e-17	2.53e-16	-0.394493	0.760757	10.4532	5.6e-34	1.96e-33
PINX1	-0.1273	0.915543	8.43558	1.24e-11	2.42e-11	0.289989	1.22263	8.43558	2.69e-35	1.65e-34	-0.0767987	0.948159	8.43558	0.00064177	0.00087578
HLTF	0.214116	1.15999	11.1663	8.59e-17	2.04e-16	0.289983	1.22263	11.1663	4.34e-19	1.44e-18	-0.561627	0.677537	11.1663	2.24e-81	2.07e-80
SYNE2	-0.082685	0.944299	8.40722	0.00109769	0.00146498	0.289862	1.22252	8.40722	5.92e-20	2.03e-19	-0.140041	0.907493	8.40722	3.37e-06	5.14e-06
MRPL46	-0.105196	0.929679	11.0309	1.89e-07	3.09e-07	0.289788	1.22246	11.0309	9.83e-31	5.09e-30	-0.10801	0.927867	11.0309	7.3e-06	1.09e-05
DUS3L	-0.20797	0.865754	9.09372	1.37e-23	4.09e-23	0.289597	1.2223	9.09372	1.98e-28	9.47e-28	0.0381077	1.02677	9.09372	0.129103	0.148236
AK2	-0.165876	0.891387	10.8738	4.62e-22	1.31e-21	0.288945	1.22175	10.8738	2.28e-41	1.74e-40	-0.02109	0.985488	10.8738	0.309331	0.337794
NOC3L	-0.308179	0.807661	10.3197	5.68e-41	2.92e-40	0.288896	1.2217	10.3197	9.23e-23	3.56e-22	0.181033	1.1337	10.3197	9.26e-11	1.68e-10
CBX2	-0.0579117	0.960654	7.5383	0.00186595	0.00245049	0.288557	1.22142	7.5383	5.74e-36	3.59e-35	-0.174063	0.886343	7.5383	2.65e-15	5.58e-15
PSTK	0.0543445	1.03839	8.3462	0.0218319	0.0266862	0.288395	1.22128	8.3462	1.84e-22	7e-22	-0.33333	0.793702	8.3462	2.08e-33	7.17e-33
BCL7B	-0.297306	0.81377	8.72005	2.03e-53	1.59e-52	0.288322	1.22122	8.72005	2.87e-31	1.52e-30	0.166103	1.12202	8.72005	2.18e-12	4.18e-12
TCHP	-0.0550233	0.962579	8.53447	0.00469504	0.00600515	0.288192	1.22111	8.53447	7.28e-33	4.1e-32	-0.17784	0.884026	8.53447	1.11e-14	2.29e-14
GTF3C3	0.00940849	1.00654	10.3213	0.660493	0.684302	0.288187	1.2211	10.3213	2.73e-27	1.25e-26	-0.269333	0.829703	10.3213	7.53e-27	2.18e-26
C10orf107	-0.0803553	0.945825	6.43923	0.0531394	0.0627708	0.288158	1.22108	6.43923	3.68e-08	7.34e-08	-0.141837	0.906364	6.43923	0.00415252	0.00539042
TMEM159	-0.464399	0.724773	8.48846	3.18e-32	1.24e-31	0.288115	1.22104	8.48846	1.13e-08	2.33e-08	0.40357	1.32278	8.48846	1.39e-17	3.14e-17
FAM122C	-0.128029	0.915081	7.39257	1.87e-10	3.49e-10	0.287884	1.22085	7.39257	1.65e-30	8.48e-30	-0.0738935	0.950071	7.39257	0.0021248	0.00280345
ZNF584	-0.194147	0.874089	8.7501	1.73e-23	5.13e-23	0.287788	1.22077	8.7501	5.31e-32	2.89e-31	0.0200843	1.01402	8.7501	0.392706	0.422194
MRPL39	-0.106333	0.928946	10.4786	2.37e-07	3.87e-07	0.287667	1.22066	10.4786	3.45e-29	1.7e-28	-0.104509	0.930121	10.4786	2.08e-05	3.05e-05
ZDHHC20	-0.132862	0.91202	7.63874	2.12e-12	4.27e-12	0.28762	1.22063	7.63874	3.01e-34	1.78e-33	-0.0667963	0.954756	7.63874	0.00321005	0.00419472
NME7	0.0969604	1.06952	11.1528	4.63e-05	6.73e-05	0.287563	1.22058	11.1528	4.42e-22	1.66e-21	-0.393109	0.761487	11.1528	5.6e-46	2.56e-45
POMT2	-0.00190539	0.99868	10.5445	0.928389	0.935822	0.287496	1.22052	10.5445	1.03e-27	4.79e-27	-0.252653	0.839351	10.5445	3.31e-24	8.97e-24
APH1A	-0.226674	0.854603	9.25347	4.54e-18	1.13e-17	0.287486	1.22051	9.25347	3.58e-18	1.14e-17	0.0665431	1.0472	9.25347	0.0346158	0.0418752
SSBP4	-0.184718	0.879821	10.8254	1.11e-20	3.02e-20	0.287433	1.22047	10.8254	7.22e-31	3.76e-30	0.0070098	1.00487	10.8254	0.769341	0.786381
AGPS	0.0565834	1.04	9.43526	0.00691556	0.00876017	0.287419	1.22045	9.43526	2.72e-28	1.3e-27	-0.335642	0.792431	9.43526	2.44e-43	1.05e-42
CLN6	-0.0859939	0.942135	9.24914	0.000266756	0.00036973	0.287379	1.22042	9.24914	1.85e-22	7.06e-22	-0.133137	0.911846	9.24914	2.11e-06	3.24e-06
C11orf49	-0.0611775	0.958482	10.4836	0.0066828	0.00847273	0.287335	1.22038	10.4836	1.67e-24	6.88e-24	-0.168339	0.889867	10.4836	3.13e-10	5.58e-10
SLC2A1	-0.107375	0.928276	10.973	0.00108813	0.00145296	0.287268	1.22033	10.973	3.67e-12	8.96e-12	-0.102676	0.931304	10.973	0.00879424	0.0111631
NTNG1	0.237307	1.17879	8.95679	5.45e-05	7.89e-05	0.287047	1.22014	8.95679	0.000113549	0.000182292	-0.591952	0.663445	8.95679	1.64e-17	3.69e-17
COX7B2	-0.155756	0.897662	5.48683	7.15e-05	0.000102834	0.286986	1.22009	5.48683	6.56e-09	1.37e-08	-0.0337213	0.976897	5.48683	0.471568	0.501117
LSM2	-0.112832	0.924771	9.44184	1.58e-08	2.71e-08	0.286861	1.21998	9.44184	8.98e-31	4.66e-30	-0.0945652	0.936554	9.44184	7.29e-05	0.000104252
PFN4	0.0367383	1.02579	7.74103	0.116521	0.133077	0.286655	1.21981	7.74103	9.45e-23	3.64e-22	-0.306783	0.808443	7.74103	4.3e-29	1.33e-28
ATP5G2	-0.0818248	0.944862	14.3537	4.13e-07	6.65e-07	0.286649	1.2198	14.3537	5.32e-47	4.93e-46	-0.13841	0.90852	14.3537	5.42e-13	1.06e-12
SYNJ2BP	-0.160655	0.894619	9.38704	7.88e-15	1.74e-14	0.286441	1.21963	9.38704	2.11e-28	1.01e-27	-0.026281	0.981948	9.38704	0.290295	0.318568
PCYT1B	-0.0108118	0.992534	7.14665	0.617282	0.642926	0.286387	1.21958	7.14665	1.94e-26	8.59e-26	-0.23902	0.847321	7.14665	6.06e-21	1.51e-20
NEUROG2	-0.122258	0.918748	5.46409	0.00045468	0.000620983	0.286377	1.21957	5.46409	6.86e-11	1.58e-10	-0.0807501	0.945566	5.46409	0.0522635	0.0622678
SFRP2	-1.04598	0.484317	7.1005	3.86e-46	2.34e-45	0.28637	1.21957	7.1005	0.00267588	0.0038199	1.231	2.3473	7.1005	5.51e-45	2.46e-44
PTGER3	-0.118	0.921464	6.96982	0.000168221	0.000236354	0.286366	1.21956	6.96982	3.82e-13	9.78e-13	-0.0867869	0.941618	6.96982	0.0203791	0.0251305
CHCHD5	-0.134331	0.911092	9.2477	2.97e-10	5.52e-10	0.286243	1.21946	9.2477	7.09e-27	3.21e-26	-0.0634855	0.956949	9.2477	0.012899	0.0161611
NSL1	0.0845512	1.06036	9.75461	6.46e-05	9.31e-05	0.286209	1.21943	9.75461	1.9e-27	8.76e-27	-0.374284	0.771488	9.75461	6.09e-53	3.21e-52
CCDC67	-0.145031	0.90436	5.31538	3.4e-12	6.79e-12	0.286125	1.21936	5.31538	5.17e-28	2.43e-27	-0.0481871	0.967151	5.31538	0.053843	0.0640706
AUTS2	0.0872538	1.06235	8.1342	0.000165632	0.000232858	0.286102	1.21934	8.1342	4.81e-23	1.88e-22	-0.378027	0.769489	8.1342	6.77e-45	3.02e-44
DBF4B	-0.0198705	0.986321	8.04206	0.227627	0.251345	0.285917	1.21918	8.04206	2.62e-45	2.29e-44	-0.225738	0.855157	8.04206	8.99e-32	2.98e-31
BUD31	-0.0445457	0.969595	12.0884	0.0256082	0.0311085	0.285882	1.21916	12.0884	8.25e-31	4.28e-30	-0.190667	0.8762	12.0884	6.08e-16	1.3e-15
CS	-0.0292342	0.97994	8.73761	0.157966	0.17754	0.285869	1.21914	8.73761	1.09e-28	5.28e-28	-0.212399	0.863101	8.73761	3.3e-18	7.59e-18
LARP7	-0.122998	0.918278	8.86259	8.77e-12	1.73e-11	0.285846	1.21912	8.86259	2.89e-37	1.89e-36	-0.0792279	0.946564	8.86259	0.000240896	0.000336059
FXR1	-0.153005	0.899375	10.6685	2.81e-10	5.23e-10	0.285803	1.21909	10.6685	6.29e-21	2.25e-20	-0.0365768	0.974966	10.6685	0.208162	0.233141
USP13	0.0856725	1.06118	10.2379	9.18e-05	0.000131107	0.285389	1.21874	10.2379	1.54e-25	6.61e-25	-0.375148	0.771026	10.2379	1.48e-49	7.31e-49
CDK2AP1	-0.107584	0.928141	13.1758	1.79e-06	2.8e-06	0.285256	1.21863	13.1758	4.03e-24	1.64e-23	-0.100593	0.93265	13.1758	0.000182123	0.000255762
EDC4	-0.0783771	0.947122	9.20231	5.24e-05	7.59e-05	0.284898	1.21832	9.20231	2.53e-32	1.39e-31	-0.14175	0.906419	9.20231	7.38e-10	1.3e-09
VARS	-0.0581551	0.960492	9.92652	0.0104499	0.0130728	0.28453	1.21801	9.92652	9.79e-24	3.92e-23	-0.17014	0.888756	9.92652	2.67e-10	4.77e-10
TMEM147	-0.232499	0.851159	9.66493	1.06e-33	4.39e-33	0.284305	1.21782	9.66493	1.53e-31	8.19e-31	0.0776393	1.05529	9.66493	0.000883857	0.00119669
SS18	-0.218777	0.859294	8.29361	4.84e-34	2.01e-33	0.284294	1.21781	8.29361	6.07e-36	3.8e-35	0.0581635	1.04114	8.29361	0.00783258	0.00997853
DBR1	-0.0203772	0.985975	8.86711	0.256607	0.281947	0.284239	1.21777	8.86711	1.41e-37	9.29e-37	-0.223529	0.856468	8.86711	2.62e-26	7.52e-26
ZNF180	0.188679	1.13972	9.22567	2.15e-12	4.32e-12	0.284075	1.21763	9.22567	4.87e-17	1.48e-16	-0.520257	0.697248	9.22567	2.26e-63	1.5e-62
GAL3ST3	-0.049433	0.966316	7.60188	0.0157821	0.0194928	0.283936	1.21751	7.60188	6.8e-29	3.31e-28	-0.181998	0.881481	7.60188	5.79e-14	1.17e-13
HDAC8	-0.0991237	0.9336	8.77128	9.29e-10	1.69e-09	0.28391	1.21749	8.77128	9.71e-46	8.61e-45	-0.111411	0.925682	8.77128	7.94e-09	1.35e-08
PEX11A	-0.169773	0.888983	7.89236	5.86e-13	1.2e-12	0.283849	1.21744	7.89236	9.68e-22	3.58e-21	-0.0110303	0.992384	7.89236	0.696659	0.718686
LRRC20	-0.0520227	0.964583	8.82213	0.0131118	0.0162956	0.283676	1.21729	8.82213	1.56e-27	7.23e-27	-0.17809	0.883872	8.82213	7.32e-13	1.43e-12
TRAPPC6A	-0.570847	0.673222	9.74221	1.6e-113	9.7e-112	0.283569	1.2172	9.74221	6.42e-17	1.95e-16	0.55877	1.47301	9.74221	1.86e-73	1.49e-72
COX7B	-0.126048	0.916338	10.6648	6.52e-09	1.15e-08	0.283313	1.21699	10.6648	1.86e-25	7.95e-25	-0.0726463	0.950892	10.6648	0.00517338	0.00667371
MESDC1	-0.246579	0.842893	11.0304	3.28e-28	1.11e-27	0.283205	1.21689	11.0304	2.01e-23	7.92e-23	0.0986124	1.07074	11.0304	0.000273585	0.000380608
ZSWIM3	-0.0297495	0.97959	8.93811	0.218561	0.241795	0.283165	1.21686	8.93811	6.71e-21	2.4e-20	-0.209266	0.864977	8.93811	2.52e-13	4.99e-13
HDLBP	-0.221571	0.857631	7.9362	2.14e-18	5.38e-18	0.283112	1.21682	7.9362	9.25e-19	3.02e-18	0.063181	1.04477	7.9362	0.0382676	0.0461339
ZNF135	0.116483	1.08409	9.35289	1.05e-07	1.74e-07	0.282994	1.21672	9.35289	4.99e-25	2.09e-24	-0.416774	0.749098	9.35289	2.04e-61	1.31e-60
PSMB2	-0.202709	0.868917	11.8834	5.72e-32	2.21e-31	0.282725	1.21649	11.8834	7.34e-39	5.07e-38	0.0367398	1.02579	11.8834	0.0792276	0.0928186
CPT1A	-0.255539	0.837674	8.15042	1.41e-30	5.21e-30	0.282723	1.21649	8.15042	1.36e-23	5.41e-23	0.111764	1.08055	8.15042	3.33e-05	4.85e-05
ZNF428	-0.0503166	0.965724	10.9602	0.0276753	0.0335177	0.282438	1.21625	10.9602	3.87e-23	1.52e-22	-0.179413	0.883062	10.9602	3.45e-11	6.36e-11
GYS1	-0.305243	0.809306	10.0393	7.49e-53	5.74e-52	0.282207	1.21605	10.0393	3.45e-28	1.64e-27	0.182806	1.13509	10.0393	6.55e-14	1.32e-13
CEBPZ	-0.00132795	0.99908	11.3816	0.954315	0.959201	0.28195	1.21584	11.3816	1.8e-22	6.85e-22	-0.248547	0.841744	11.3816	8.51e-20	2.05e-19
RBBP7	-0.15249	0.899696	10.2866	2.5e-19	6.47e-19	0.281377	1.21535	10.2866	2.33e-40	1.7e-39	-0.0333768	0.977131	10.2866	0.102582	0.118964
TUBA1B	-0.0384215	0.97372	15.8946	0.0991321	0.114027	0.280956	1.215	15.8946	4.35e-22	1.63e-21	-0.194988	0.87358	15.8946	1.53e-12	2.95e-12
TMEM99	-0.0873854	0.941227	10.5455	0.00192041	0.00251857	0.280895	1.21495	10.5455	1.9e-15	5.41e-15	-0.125403	0.916748	10.5455	0.000185241	0.000260109
RPLP0	-0.0676799	0.954171	15.8317	0.00137984	0.00183099	0.280818	1.21488	15.8317	1.66e-26	7.41e-26	-0.153317	0.899181	15.8317	1.03e-09	1.8e-09
GPKOW	-0.185811	0.879155	11.6026	9.69e-25	3e-24	0.28065	1.21474	11.6026	4.87e-35	2.95e-34	0.014586	1.01016	11.6026	0.505225	0.534236
PABPN1	-0.113528	0.924325	12.6746	5.8e-11	1.11e-10	0.280541	1.21465	12.6746	7.82e-39	5.4e-38	-0.0879632	0.94085	12.6746	2.21e-05	3.24e-05
HAPLN1	-0.142868	0.905717	6.42924	0.000515609	0.000701963	0.280427	1.21455	6.42924	6.52e-08	1.28e-07	-0.0461973	0.968486	6.42924	0.346823	0.376076
ITGA2B	-0.0148933	0.98973	7.66473	0.511318	0.539891	0.280375	1.21451	7.66473	3.48e-23	1.37e-22	-0.227884	0.853886	7.66473	1.57e-17	3.53e-17
DDX52	0.0207617	1.01449	10.1915	0.331696	0.359371	0.280091	1.21427	10.1915	6.83e-26	2.97e-25	-0.278264	0.824583	10.1915	1.09e-28	3.33e-28
LYPLA2	-0.182067	0.881439	8.05618	1.55e-10	2.91e-10	0.280079	1.21426	8.05618	5.77e-15	1.61e-14	0.0097768	1.0068	8.05618	0.774337	0.791139
ZDHHC3	-0.148997	0.901877	9.42185	2.44e-14	5.3e-14	0.280017	1.21421	9.42185	2.28e-30	1.17e-29	-0.0371302	0.974592	9.42185	0.113708	0.131222
STAMBP	-0.0276025	0.981049	8.59097	0.133499	0.151348	0.279939	1.21414	8.59097	9.54e-35	5.74e-34	-0.209449	0.864867	8.59097	3.62e-22	9.32e-22
SEZ6L	0.265333	1.20191	9.85059	2.52e-11	4.88e-11	0.279923	1.21413	9.85059	2.76e-08	5.54e-08	-0.625423	0.64823	9.85059	2.71e-41	1.12e-40
GDAP1	0.176254	1.12995	8.45382	8.88e-10	1.62e-09	0.279893	1.2141	8.45382	1.15e-14	3.16e-14	-0.498898	0.707647	8.45382	1.55e-50	7.82e-50
ATF1	-0.137878	0.908855	8.78963	4.92e-09	8.69e-09	0.279727	1.21397	8.78963	3.05e-21	1.1e-20	-0.0526618	0.964156	8.78963	0.0619548	0.0732866
EMD	-0.328363	0.79644	10.2239	1.04e-51	7.65e-51	0.279717	1.21396	10.2239	1.42e-23	5.66e-23	0.217848	1.163	10.2239	1.86e-16	4.04e-16
FKBPL	-0.0236961	0.983709	7.47125	0.31513	0.342351	0.279657	1.21391	7.47125	2.15e-21	7.83e-21	-0.214746	0.861698	7.47125	1.32e-14	2.71e-14
C18orf25	-0.21707	0.860311	8.863	5.39e-31	2.01e-30	0.27953	1.2138	8.863	3.95e-32	2.16e-31	0.0599711	1.04244	8.863	0.00840678	0.0106912
HDAC6	-0.0829747	0.944109	9.50708	2.12e-07	3.46e-07	0.279365	1.21366	9.50708	1.51e-45	1.33e-44	-0.130307	0.913637	9.50708	7e-12	1.32e-11
QRICH2	0.108504	1.07811	7.49411	1.08e-05	1.62e-05	0.279311	1.21361	7.49411	1.57e-19	5.28e-19	-0.402171	0.756718	7.49411	8.65e-45	3.84e-44
OXA1L	-0.350621	0.784247	10.7478	3.2e-61	3.26e-60	0.279279	1.21359	10.7478	3.27e-24	1.33e-23	0.249845	1.18908	10.7478	6.48e-22	1.66e-21
ABCB7	-0.182257	0.881323	10.4339	6.52e-21	1.78e-20	0.279168	1.21349	10.4339	2.82e-30	1.44e-29	0.0108561	1.00755	10.4339	0.643358	0.667923
PCK2	-0.301837	0.811219	10.0646	9.37e-30	3.35e-29	0.279093	1.21343	10.0646	2.16e-16	6.41e-16	0.180734	1.13346	10.0646	1.98e-08	3.3e-08
ZNF566	0.171025	1.12586	7.79806	3.22e-13	6.68e-13	0.278974	1.21333	7.79806	3.48e-21	1.26e-20	-0.490656	0.711701	7.79806	1.97e-74	1.62e-73
PWP2	-0.294831	0.815168	10.271	4.54e-47	2.86e-46	0.278808	1.21319	10.271	2.13e-26	9.41e-26	0.171038	1.12587	10.271	7.13e-12	1.34e-11
PLA2G12A	-0.236201	0.848978	9.38067	5.75e-21	1.57e-20	0.278615	1.21303	9.38067	2.15e-18	6.92e-18	0.0879514	1.06286	9.38067	0.00370935	0.0048254
C9orf43	-0.214823	0.861652	6.10018	8.08e-29	2.79e-28	0.278581	1.213	6.10018	2.79e-30	1.43e-29	0.0576231	1.04075	6.10018	0.0136987	0.0171093
BEX1	0.161247	1.11825	14.0467	2.5e-06	3.9e-06	0.278573	1.21299	14.0467	1.12e-10	2.55e-10	-0.476415	0.718762	14.0467	1.61e-32	5.44e-32
ZNF41	-0.102957	0.931123	7.39161	4.08e-08	6.9e-08	0.278294	1.21276	7.39161	9.23e-33	5.16e-32	-0.10098	0.9324	7.39161	6.49e-06	9.74e-06
BRF2	-0.147352	0.902906	9.24256	3.91e-10	7.23e-10	0.27829	1.21276	9.24256	4.81e-21	1.73e-20	-0.0379319	0.97405	9.24256	0.178799	0.201953
RAB23	-0.0742267	0.949851	9.3006	0.00390654	0.00501991	0.278287	1.21275	9.3006	5.7e-18	1.8e-17	-0.141772	0.906405	9.3006	3.59e-06	5.46e-06
STRN4	-0.0797723	0.946207	10.8069	7.93e-05	0.000113744	0.277986	1.2125	10.8069	2.33e-28	1.11e-27	-0.13363	0.911535	10.8069	2.7e-08	4.48e-08
WDR25	-0.146656	0.903342	8.60915	6.22e-14	1.33e-13	0.277861	1.2124	8.60915	6.51e-30	3.3e-29	-0.0385385	0.973641	8.60915	0.100626	0.116847
RBM10	-0.045995	0.968622	13.0034	0.0142508	0.0176599	0.277836	1.21237	13.0034	7.22e-33	4.06e-32	-0.181462	0.881809	13.0034	2.7e-16	5.85e-16
SIRT7	-0.152336	0.899792	10.7631	4.21e-13	8.72e-13	0.277789	1.21234	10.7631	5.53e-26	2.42e-25	-0.0304089	0.979143	10.7631	0.228098	0.254044
JAGN1	-0.158459	0.895982	11.9646	1.42e-14	3.12e-14	0.277744	1.2123	11.9646	5.74e-27	2.6e-26	-0.0216746	0.985089	11.9646	0.381161	0.410735
STRN	-0.0988733	0.933762	7.34639	1.17e-10	2.2e-10	0.277712	1.21227	7.34639	9.43e-49	9.2e-48	-0.106261	0.928992	7.34639	6.46e-09	1.1e-08
VPRBP	-0.0674136	0.954347	8.91221	0.000347972	0.00047903	0.277696	1.21226	8.91221	1.71e-32	9.49e-32	-0.150923	0.900674	8.91221	1.46e-11	2.73e-11
CINP	-0.214387	0.861912	7.43242	5.17e-31	1.93e-30	0.277685	1.21225	7.43242	1.61e-32	8.9e-32	0.0577999	1.04088	7.43242	0.0101019	0.0127768
PDDC1	-0.168835	0.889561	10.7275	3.41e-15	7.64e-15	0.277668	1.21223	10.7275	6.48e-25	2.71e-24	-0.00687216	0.995248	10.7275	0.789788	0.805647
DCHS1	0.111116	1.08006	10.6587	2.28e-05	3.36e-05	0.277548	1.21213	10.6587	3.41e-17	1.04e-16	-0.404315	0.755595	10.6587	5.97e-40	2.38e-39
EIF3B	-0.106824	0.92863	11.668	2.92e-09	5.2e-09	0.277496	1.21209	11.668	2.45e-35	1.5e-34	-0.0947792	0.936416	11.668	1.04e-05	1.54e-05
ZPLD1	-0.181578	0.881738	5.70424	6.3e-08	1.05e-07	0.27743	1.21203	5.70424	5.75e-11	1.33e-10	0.0114348	1.00796	5.70424	0.775871	0.792497
VPS37C	-0.406038	0.754693	10.9606	6.05e-81	1.26e-79	0.277407	1.21201	10.9606	3.55e-23	1.39e-22	0.330204	1.25719	10.9606	1.36e-36	5e-36
SPRED2	-0.194385	0.873945	7.71874	2.19e-17	5.31e-17	0.276319	1.2111	7.71874	1.13e-21	4.18e-21	0.030609	1.02144	7.71874	0.267167	0.295089
RBM15B	0.0134054	1.00934	8.45032	0.540058	0.567701	0.276208	1.21101	8.45032	3.94e-24	1.6e-23	-0.264369	0.832563	8.45032	7.34e-25	2.02e-24
PFAS	0.129629	1.09401	9.36942	1.04e-07	1.72e-07	0.276123	1.21094	9.36942	1.71e-19	5.75e-19	-0.429339	0.742602	9.36942	2.51e-52	1.31e-51
C18orf21	0.0377882	1.02654	11.0158	0.081676	0.0947284	0.27606	1.21088	11.0158	1.84e-24	7.59e-24	-0.298862	0.812893	11.0158	4.74e-32	1.58e-31
MED25	0.0612908	1.0434	8.96058	0.00714993	0.00904914	0.276051	1.21088	8.96058	2.96e-22	1.12e-21	-0.33223	0.794308	8.96058	7.41e-36	2.69e-35
TMEM41A	-0.242279	0.845409	7.86394	2.08e-28	7.09e-28	0.275937	1.21078	7.86394	3.29e-23	1.29e-22	0.0989612	1.071	7.86394	0.000191063	0.000268188
PREB	-0.291474	0.817067	11.0256	4.37e-53	3.37e-52	0.275801	1.21067	11.0256	1.28e-29	6.41e-29	0.168941	1.12423	11.0256	3.67e-13	7.22e-13
C12orf43	-0.0283464	0.980544	8.75041	0.152156	0.171509	0.275767	1.21064	8.75041	3.41e-29	1.68e-28	-0.204687	0.867727	8.75041	1.76e-18	4.09e-18
NDUFB1	-0.24028	0.846581	11.5992	4.12e-34	1.71e-33	0.275683	1.21057	11.5992	3.55e-28	1.68e-27	0.0963481	1.06906	11.5992	5.81e-05	8.34e-05
GNL2	-0.0816333	0.944987	11.7376	0.000139788	0.000197411	0.275668	1.21055	11.7376	6.56e-25	2.74e-24	-0.128928	0.914511	11.7376	4.29e-07	6.81e-07
DNAJC5G	-0.0093947	0.993509	7.11178	0.81681	0.832478	0.275626	1.21052	7.11178	6.76e-08	1.33e-07	-0.231474	0.851764	7.11178	1.54e-06	2.39e-06
TTC9C	-0.198202	0.871636	10.5437	7.89e-22	2.21e-21	0.27562	1.21051	10.5437	3.33e-26	1.46e-25	0.0366495	1.02573	10.5437	0.141398	0.161616
PIK3R4	-0.204225	0.868005	9.2287	7.82e-25	2.43e-24	0.275428	1.21035	9.2287	3.86e-28	1.83e-27	0.0453736	1.03195	9.2287	0.0587128	0.0696151
TTLL4	-0.108266	0.927702	8.16907	8.46e-07	1.34e-06	0.275346	1.21028	8.16907	1.32e-23	5.27e-23	-0.0908218	0.938988	8.16907	0.000539369	0.000738913
NDUFA6	-0.220586	0.858217	12.4513	4.83e-31	1.81e-30	0.275135	1.21011	12.4513	3.21e-30	1.64e-29	0.0688676	1.04889	12.4513	0.00287166	0.00376272
CCDC94	-0.126942	0.915771	9.11703	4.11e-09	7.27e-09	0.27502	1.21001	9.11703	2.57e-24	1.05e-23	-0.0640114	0.956601	9.11703	0.01322	0.0165361
PDK3	-0.447091	0.73352	7.5455	2.61e-116	1.77e-114	0.274814	1.20984	7.5455	7.58e-26	3.29e-25	0.390806	1.31113	7.5455	4.26e-59	2.58e-58
TRDMT1	-0.0954898	0.935954	7.2736	6.5e-06	9.9e-06	0.274754	1.20979	7.2736	2.68e-25	1.14e-24	-0.108439	0.927591	7.2736	1.74e-05	2.56e-05
GNG8	0.0666101	1.04725	9.26257	0.302006	0.32902	0.274682	1.20973	9.26257	0.000748611	0.00112466	-0.338568	0.790826	9.26257	1.01e-05	1.51e-05
DLX5	-0.236326	0.848905	6.00907	1.33e-10	2.51e-10	0.274565	1.20963	6.00907	3.72e-09	7.85e-09	0.0917254	1.06564	6.00907	0.037432	0.0451876
ZSWIM1	-0.0335156	0.977037	7.94083	0.0839713	0.0972834	0.274521	1.20959	7.94083	4.12e-30	2.1e-29	-0.19624	0.872823	7.94083	9.65e-18	2.19e-17
LIG3	0.0310718	1.02177	7.99458	0.0910595	0.105096	0.274494	1.20957	7.99458	1.92e-33	1.1e-32	-0.287934	0.819074	7.99458	1.96e-41	8.14e-41
SHROOM3	-0.629089	0.646584	7.71725	2.15e-25	6.78e-25	0.27437	1.20947	7.71725	0.000396366	0.000609305	0.64965	1.56879	7.71725	2.5e-19	5.94e-19
TRIM54	-0.119829	0.920296	6.214	0.000230703	0.000321259	0.274117	1.20925	6.214	2.19e-11	5.17e-11	-0.0733088	0.950456	6.214	0.0590283	0.0699605
ABT1	-0.082114	0.944672	8.44743	8.04e-05	0.000115175	0.274025	1.20918	8.44743	4.97e-26	2.18e-25	-0.126786	0.915869	8.44743	3.1e-07	4.95e-07
B3GAT3	-0.230485	0.852348	9.04183	3.65e-18	9.13e-18	0.273867	1.20904	9.04183	3.5e-16	1.03e-15	0.0840509	1.05999	9.04183	0.00846706	0.0107632
RFT1	-0.312482	0.805255	9.48702	1.74e-71	2.61e-70	0.273621	1.20884	9.48702	1.36e-33	7.81e-33	0.200711	1.14926	9.48702	1.14e-20	2.81e-20
STYX	-0.243801	0.844517	7.34669	1.89e-47	1.2e-46	0.273572	1.2088	7.34669	2.9e-37	1.89e-36	0.103224	1.07417	7.34669	5.54e-07	8.74e-07
EDA2R	-0.0771676	0.947917	6.57958	0.00121107	0.00161202	0.273537	1.20877	6.57958	4.75e-20	1.64e-19	-0.133377	0.911695	6.57958	2.58e-06	3.95e-06
ARL6	0.0419654	1.02952	7.13137	0.133584	0.151425	0.273527	1.20876	7.13137	6.26e-15	1.74e-14	-0.302545	0.810821	7.13137	4.15e-20	1.01e-19
TMEM55B	-0.324407	0.798627	10.54	5.62e-57	4.99e-56	0.273473	1.20871	10.54	2.81e-25	1.19e-24	0.217777	1.16294	10.54	2.37e-18	5.48e-18
LRP2BP	0.0414038	1.02911	7.28504	0.141116	0.159577	0.273468	1.20871	7.28504	9.05e-15	2.5e-14	-0.301695	0.811299	7.28504	8.67e-20	2.09e-19
CCDC28B	0.020257	1.01414	10.3505	0.40078	0.42928	0.273272	1.20855	10.3505	1.18e-19	4.01e-19	-0.271491	0.828463	10.3505	1.02e-21	2.59e-21
ZNF45	-0.101108	0.932316	7.45052	1.58e-07	2.6e-07	0.273171	1.20846	7.45052	6.1e-30	3.09e-29	-0.0990537	0.933645	7.45052	1.67e-05	2.48e-05
ARMCX5	-0.0998729	0.933115	9.2535	2.23e-06	3.47e-06	0.273085	1.20839	9.2535	3.85e-25	1.62e-24	-0.100732	0.93256	9.2535	6.31e-05	9.04e-05
PPP2R5E	0.073785	1.05247	12.2788	0.000146266	0.000206409	0.272801	1.20815	12.2788	1.54e-29	7.72e-29	-0.347086	0.78617	12.2788	4.62e-54	2.51e-53
KIN	-0.0766897	0.948231	9.78574	2.48e-05	3.65e-05	0.272722	1.20808	9.78574	1.34e-33	7.72e-33	-0.133331	0.911724	9.78574	6.82e-10	1.2e-09
ATG4D	-0.123953	0.91767	9.05637	1.43e-14	3.13e-14	0.272609	1.20799	9.05637	2.76e-42	2.18e-41	-0.0661134	0.955208	9.05637	0.000626188	0.000855323
SMURF2	0.0373382	1.02622	8.9482	0.0947542	0.109208	0.272067	1.20754	8.9482	1.71e-22	6.52e-22	-0.294677	0.815255	8.9482	1.94e-29	6.04e-29
RPP14	-0.0534981	0.963597	9.57893	0.00216534	0.00283147	0.272016	1.20749	9.57893	2.13e-36	1.35e-35	-0.165638	0.891534	9.57893	9.66e-16	2.06e-15
CRABP2	-0.24094	0.846194	8.7167	4.08e-10	7.52e-10	0.271734	1.20726	8.7167	2.56e-08	5.15e-08	0.100793	1.07236	8.7167	0.0289905	0.035321
HSPA4L	0.288121	1.22105	8.61901	2.41e-13	5.04e-13	0.27171	1.20724	8.61901	5.23e-08	1.04e-07	-0.650489	0.637064	8.61901	1.37e-45	6.18e-45
AMHR2	0.00758861	1.00527	7.34052	0.858408	0.871118	0.271585	1.20713	7.34052	4.02e-07	7.55e-07	-0.252003	0.83973	7.34052	6.05e-07	9.53e-07
STARD7	-0.0897837	0.939664	12.7612	1.81e-07	2.96e-07	0.271555	1.20711	12.7612	4.23e-37	2.75e-36	-0.1137	0.924214	12.7612	2.89e-08	4.8e-08
C12orf10	-0.106735	0.928687	11.3617	5.59e-07	8.94e-07	0.271485	1.20705	11.3617	2.37e-24	9.73e-24	-0.089566	0.939805	11.3617	0.000434971	0.000599151
COX11	0.1856	1.13729	10.3116	4.51e-15	1.01e-14	0.271394	1.20697	10.3116	9.54e-20	3.25e-19	-0.504621	0.704846	10.3116	1.87e-77	1.62e-76
FIZ1	-0.0216203	0.985126	8.69104	0.266532	0.292214	0.271273	1.20687	8.69104	3.05e-29	1.51e-28	-0.210247	0.864389	8.69104	4.46e-20	1.08e-19
RDH5	-0.168599	0.889706	9.36781	6.91e-11	1.31e-10	0.270853	1.20652	9.36781	8.86e-17	2.68e-16	-0.0011538	0.999201	9.36781	0.970303	0.973918
DNAJC19	-0.0883492	0.940598	9.5667	1.61e-06	2.53e-06	0.270814	1.20649	9.5667	2.88e-32	1.59e-31	-0.115079	0.923332	9.5667	1.55e-07	2.51e-07
SLC5A3	-0.128184	0.914982	8.24498	2.69e-06	4.18e-06	0.270776	1.20646	8.24498	3.13e-15	8.84e-15	-0.0584773	0.960277	8.24498	0.073186	0.0860099
RBP1	0.13325	1.09676	12.0414	0.00241296	0.00314426	0.270618	1.20632	12.0414	1.04e-06	1.91e-06	-0.429591	0.742472	12.0414	1.24e-16	2.71e-16
SLC25A20	-0.324552	0.798546	10.0186	6.42e-46	3.85e-45	0.270549	1.20627	10.0186	2.92e-20	1.02e-19	0.22058	1.1652	10.0186	1.82e-15	3.85e-15
ZBTB26	0.104625	1.07522	8.35971	1.37e-07	2.25e-07	0.270512	1.20624	8.35971	9.43e-28	4.39e-27	-0.388848	0.763739	8.35971	2.68e-65	1.85e-64
ATP2B1	-0.159905	0.895084	8.76568	3.13e-11	6.04e-11	0.270463	1.20619	8.76568	4.32e-19	1.43e-18	-0.0131537	0.990924	8.76568	0.648758	0.672805
PHPT1	-0.0424906	0.970977	13.5265	0.0457212	0.0543279	0.270403	1.20614	13.5265	1.94e-24	7.99e-24	-0.179837	0.882803	13.5265	9.02e-13	1.75e-12
PTTG1IP	-0.378686	0.769138	10.0865	7.71e-57	6.83e-56	0.270303	1.20606	10.0865	2.21e-18	7.1e-18	0.297673	1.22916	10.0865	1.04e-24	2.85e-24
DDX55	0.0220512	1.0154	9.64393	0.304692	0.331696	0.270295	1.20605	9.64393	5.74e-24	2.31e-23	-0.271395	0.828518	9.64393	4.35e-27	1.27e-26
GGN	-0.212394	0.863104	7.29894	5.94e-22	1.67e-21	0.270245	1.20601	7.29894	3.24e-22	1.22e-21	0.0615774	1.04361	7.29894	0.0206858	0.0254924
[truncated: 9,585 more rows]
