# Supplementary material for: Identification of MYCN non-amplified neuroblastoma subgroups points towards molecular signatures for precision prognosis and therapy stratification
Source: Research Square preprint supplement (doi:10.21203/rs.3.rs-478917/v1), 2021-05-28
Supplement: Supplementary file 4 [file 522730d1e0f7a5c13b885ee7.docx]

**Table S3**. Univariate and multivariate logistic regression analysis in *MYCN* non-amplified neuroblastomas (n = 1,120).

|  | **OR (95% CI)** | **P-value** |
| --- | --- | --- |
| Univariate |  |  |
| ***Age*** |  |  |
| ≤ 18 months | **Reference** |  |
| > 18 months | 4.78 (3.56 ~ 6.42) | < 2E-16 |
| ***INSS Stage*** |  |  |
| Stage_1 | **Reference** |  |
| Stage_2 | 9.27 (3.25 ~ 26.50) | 3.23E-05 |
| Stage_3 | 15.22 (5.37 ~ 43.10) | 3.00E-07 |
| Stage_4 | 42.91 (15.89 ~ 116) | 1.20E-13 |
| Stage_4S | 5.78 (1.84 ~ 18.14) | 0.00267 |
| ***Subgroup*** |  |  |
| Subgroup 1 | **Reference** |  |
| Subgroup 2 | 13.88 (9.74 ~ 19.76) | < 2E-16 |
| Subgroup 3 | 4.88 (3.32 ~ 7.17) | 6.15E-16 |

| Multivariate |  |  |
| --- | --- | --- |
| ***Age*** |  |  |
| ≤ 18 months | **Reference** |  |
| > 18 months | 1.74 (1.25 ~ 2.42) | 0.00107 |
| ***INSS Stage*** |  |  |
| Stage_1 | **Reference** |  |
| Stage_2 | 6.94 (2.42 ~ 19.90) | 0.000313 |
| Stage_3 | 10.57 (3.71 ~ 30.14) | 1.03E-05 |
| Stage_4 | 13.80 (4.97 ~ 38.35) | 4.76E-07 |
| Stage_4S | 5.52 (1.75 ~ 17.43) | 0.00356 |
| ***Subgroup*** |  |  |
| Subgroup 1 | **Reference** |  |
| Subgroup 2 | 5.07 (3.31 ~ 7.75) | 7.53E-14 |
| Subgroup 3 | 2.92 (1.94 ~ 4.40) | 2.98E-07 |

INSS: the International Neuroblastoma Staging System.
