# Supplementary material for: Identification of MYCN non-amplified neuroblastoma subgroups points towards molecular signatures for precision prognosis and therapy stratification
Source: Research Square preprint supplement (doi:10.21203/rs.3.rs-478917/v1), 2021-05-28
Supplement: Supplementary file 5 [file 5ca747224f18691a6553687d.xlsx]

## Sheet: Top 50% Variable Genes
Table S2. List of top 50% variable genes for consensus clustering.
Heatmap_order	Gene
1	TSPAN5
2	FJX1
3	LDLRAD3
4	DLEU7
5	ACVR2B
6	PLXNA1
7	RAD54L2
8	FARP1
9	QRICH2
10	MYT1
11	KCNB1
12	CLGN
13	LRRC49
14	ISL1
15	CD24
16	RSPRY1
17	PHACTR3
18	GDAP1L1
19	H2AFY2
20	SOX12
21	EIF2S2
22	STAC
23	NT5DC2
24	KCTD6
25	KIF26B
26	BRWD1
27	UPF3A
28	TUBGCP3
29	NSUN6
30	TH
31	DDC
32	LMO1
33	RGS5
34	GCH1
35	DSEL
36	DOK4
37	APBA2
38	RIMS3
39	IGSF3
40	PYGB
41	MMP15
42	SHF
43	MDGA1
44	CORO2A
45	NTRK1
46	TLN2
47	ZFPM2
48	SLCO3A1
49	INSRR
50	HMX1
51	CHST1
52	GATA2
53	TBX20
54	RHPN2
55	TOM1L1
56	PHYHIPL
57	THNSL1
58	AS3MT
59	ROBO1
60	MEIS2
61	NETO1
62	CGREF1
63	FNDC4
64	KHK
65	SEMA4G
66	TRIM17
67	TMIE
68	ATP2B2
69	WBSCR27
70	SIRT4
71	CREB3L4
72	VPS37D
73	LRRC61
74	TIGD5
75	NFKBIL1
76	PRSS27
77	CPXM1
78	PLXNB1
79	PTK7
80	MFAP2
81	SAMD11
82	KLHL17
83	CDH22
84	IGF2BP2
85	SYT6
86	TPM1
87	SLIT3
88	KCNG1
89	GALNT6
90	FLRT1
91	PC
92	HAND1
93	DRD2
94	SYT2
95	SHC1
96	POU4F2
97	KLHL4
98	HIST1H1A
99	MPDU1
100	NLE1
101	PRPH
102	SYT13
103	EBF1
104	PRUNE2
105	EPB41L4A
106	ITGA8
107	OSBPL3
108	NPFF
109	CTNND2
110	CYFIP2
111	ECEL1
112	LRRC3B
113	FBXL20
114	B3GALT1
115	SCPEP1
116	EZH1
117	SGSH
118	PTPRH
119	ABLIM3
120	NDRG4
121	ZCCHC12
122	THRA
123	PINK1
124	CADM3
125	PDK2
126	CASD1
127	CPEB4
128	PRKAG2
129	RAB3B
130	SLC18A2
131	ZFYVE27
132	SLC29A1
133	DOCK3
134	DHRS12
135	SLC2A11
136	C8orf44
137	EPHX2
138	FRMD4A
139	HSPA12A
140	ANK3
141	DIP2C
142	SPTAN1
143	KIF1B
144	C14orf37
145	SLIT2
146	BCL2
147	BTBD3
148	RND3
149	ALCAM
150	EFNB2
151	CROT
152	POF1B
153	LRRTM4
154	CDH6
155	SCRG1
156	TUSC1
157	PAG1
158	UBE4B
159	ZNF436
160	REEP1
161	CAMK2B
162	ARHGEF10L
163	MAP7D1
164	JUP
165	GDPD5
166	SLC18A1
167	WNT4
168	GFRA3
169	PSD3
170	LRCH1
171	ANKRD6
172	NCALD
173	RGS9
174	PRICKLE1
175	PRICKLE2
176	HS3ST5
177	GRIN3A
178	KLHDC8A
179	LEMD1
180	ELAVL2
181	PTPRD
182	RYR2
183	PCDH9
184	CDH18
185	SLITRK1
186	NEBL
187	AK5
188	NEGR1
189	PIWIL2
190	ATCAY
191	RAB11FIP4
192	BRSK2
193	MANEAL
194	PTPRF
195	KIAA1522
196	KCNH2
197	BAI2
198	KIAA1549
199	ACTL6B
200	GPC2
201	MPP3
202	HCN3
203	DCHS1
204	RAPGEFL1
205	GNB3
206	PRKCZ
207	CACNB3
208	MAP3K12
209	ING4
210	ACAD10
211	TMEM145
212	PPFIA3
213	LPHN1
214	DMPK
215	BZRAP1
216	TCAP
217	TGM1
218	COL11A2
219	ZNF500
220	ZNF785
221	WFIKKN1
222	PEX6
223	FAM63A
224	PRRT2
225	CCDC136
226	PROCA1
227	KCNH4
228	MAP3K9
229	SH2B2
230	SHANK1
231	DLG4
232	FRS3
233	NT5M
234	NLGN2
235	VAMP2
236	SEZ6
237	ST8SIA2
238	CDK5R1
239	P2RX3
240	ARSD
241	KRT20
242	TAS2R5
243	TSPAN13
244	KLHL7
245	MAGI2
246	GNAI1
247	GPR85
248	CYCS
249	UBE2D4
250	C7orf31
251	ABCA5
252	DNM3
253	SGIP1
254	ZNF540
255	IFRD1
256	PRKAR2B
257	GBAS
258	JAZF1
259	PSD2
260	NXPH1
261	KLF12
262	STH
263	ANKFY1
264	RUNX1T1
265	CCDC93
266	CACNB4
267	SNAP25
268	DYNC1I2
269	DNM1L
270	NCKAP1
271	KIAA1841
272	AADAT
273	REV3L
274	RGS17
275	NAALAD2
276	KIF5C
277	SCN9A
278	SCN2A
279	SCN3A
280	ARHGAP21
281	BAZ2B
282	PRKACB
283	OLA1
284	CAB39
285	FAM126B
286	CEP68
287	WDSUB1
288	SERINC1
289	PGM2L1
290	NCOA7
291	AHI1
292	HIVEP2
293	ATXN1
294	MTSS1
295	TFAP2B
296	PLCD4
297	DAPK1
298	PLXNC1
299	TRIB2
300	PRKCE
301	PTPRO
302	KIAA1598
303	LPPR4
304	LINGO2
305	C5orf30
306	THEM4
307	ZKSCAN1
308	SDCCAG8
309	SH3YL1
310	ZNF83
311	AKAP11
312	TARBP1
313	WSB1
314	DMTF1
315	DOCK4
316	C1QTNF3
317	TTC3
318	CRYZL1
319	TRA2A
320	ZNF789
321	KRIT1
322	AKAP9
323	SORBS2
324	GTF2H5
325	LRRC4
326	ZNF397
327	FLJ33360
328	STX6
329	CAMK2G
330	ZNF25
331	RUFY2
332	MXI1
333	AMN1
334	THAP2
335	CCDC23
336	ZC3H6
337	DOPEY1
338	ULK2
339	HECW1
340	KBTBD7
341	ZNF287
342	ZFP2
343	RBMS3
344	SATB1
345	ZBTB20
346	PXK
347	SNRK
348	SRGAP1
349	MYO1B
350	DENND1B
351	BACH2
352	SCML4
353	TSPAN2
354	DKK1
355	CLK1
356	RICTOR
357	SENP6
358	DLG1
359	PURG
360	FZD3
361	PCM1
362	KATNAL1
363	SACS
364	SENP7
365	TIA1
366	FUBP1
367	MAP4K3
368	ZNF711
369	HFM1
370	ZNF781
371	FANCL
372	ARL6IP6
373	CXXC4
374	PAK7
375	TMEM169
376	KLHL23
377	SESTD1
378	PGAP1
379	MYSM1
380	FBXL4
381	FAM63B
382	MYO9A
383	SEMA6D
384	RASA1
385	DMXL2
386	AK3
387	IFT74
388	RFX3
389	TSC1
390	ZDHHC21
391	DZIP1
392	KBTBD6
393	BIVM
394	FBXL3
395	USPL1
396	CDK8
397	RFXAP
398	FNDC3A
399	RIT1
400	KCNRG
401	PCDHB4
402	PCDHB6
403	PCDHB17
404	PCDHB18
405	PCDHB2
406	PCDHB7
407	PCDHB8
408	PCDHB10
409	PCDHB9
410	PCDHB16
411	PCDHB14
412	PCDHB11
413	PCDHB13
414	PCDHB12
415	ING3
416	ARHGAP28
417	KLHL24
418	PPP2R3A
419	ATP8A1
420	RPS6KA5
421	ARRDC3
422	TCP11L2
423	DST
424	C1orf213
425	SLMO1
426	NPDC1
427	MAMDC4
428	KIFC2
429	MAPK11
430	CCDC78
431	CACNA2D2
432	LINGO1
433	KBTBD11
434	PXDNL
435	CNNM4
436	DGKD
437	ZNF692
438	IFT172
439	STK36
440	ANKZF1
441	TUBGCP6
442	OBSCN
443	SLC26A10
444	CPSF1
445	RNF122
446	PDE2A
447	NUMA1
448	STARD10
449	RGMB
450	GAB2
451	PVRL1
452	ARSF
453	ZBTB16
454	ROBO3
455	HIP1R
456	CRIP3
457	EPS8L1
458	ASGR1
459	STK31
460	CCDC17
461	KIAA1683
462	SLFNL1
463	C9orf24
464	HSD17B3
465	TECTA
466	CGN
467	MAGEC3
468	AMT
469	IL11RA
470	PNPLA7
471	PDIA2
472	RGS11
473	ARHGEF17
474	COL7A1
475	CORO6
476	SEC31B
477	AGER
478	CRIPAK
479	WDR27
480	SPAG8
481	TMPRSS5
482	PAQR6
483	TRIM45
484	PROM2
485	SCNN1D
486	MST1R
487	DDX17
488	LENG8
489	GALNT3
490	EVL
491	CIRBP
492	PILRA
493	MYH3
494	ITIH4
495	ST8SIA1
496	PVRL3
497	PCDH7
498	ZNF423
499	RORB
500	NDST3
501	EPHA5
502	PDE11A
503	DACT2
504	SLC26A1
505	LRRC2
506	CNNM1
507	SLC6A2
508	TG
509	CCDC122
510	SLITRK6
511	PRR16
512	SORL1
513	LHFPL2
514	KIRREL3
515	DIRAS3
516	FREM1
517	IRS1
518	NLRP3
519	SLC13A3
520	PKNOX2
521	ZNF618
522	CHST12
523	MYO15A
524	PROX1
525	EYA1
526	TSHZ1
527	TEKT3
528	CATSPER3
529	CACNG1
530	FLJ26850
531	C1orf110
532	UPP2
533	UPB1
534	TMED4
535	HP1BP3
536	NES
537	GABRP
538	CNKSR2
539	KLHL34
540	AKAP4
541	CACNA2D3
542	ANKFN1
543	CCBE1
544	FOXP1
545	FGD6
546	INPP4B
547	DLC1
548	ADRB2
549	TRIM55
550	FAM89A
551	REEP6
552	FZD8
553	NRP1
554	ETS2
555	RFTN1
556	MAP3K5
557	FAM43A
558	CNKSR3
559	CTNNA1
560	MBNL2
561	LIFR
562	CBFB
563	PELI1
564	GREM1
565	TUBB1
566	SLC7A11
567	TSPAN9
568	PRND
569	PPFIBP2
570	CYB5R2
571	LAMA4
572	PHLDB1
573	CGNL1
574	CREG2
575	SOX6
576	AMIGO2
577	SLC22A4
578	STGC3
579	WDR78
580	INSL5
581	LEFTY1
582	SLC7A9
583	SGK2
584	C1orf101
585	ADAM32
586	CMTM2
587	FEZF2
588	C3orf14
589	NUDT10
590	NUDT11
591	FAM133A
592	GLRB
593	GRIA2
594	RNF175
595	TRAM1L1
596	GDAP1
597	LRP12
598	RIMS2
599	KHDRBS3
600	NCOA2
601	ANK2
602	NEK1
603	OXCT1
604	SLC25A12
605	HSPA4L
606	TTLL7
607	MAP1B
608	JAKMIP2
609	ACSL3
610	MBOAT2
611	KIAA1715
612	STK39
613	PTPLAD1
614	SLC10A4
615	ZAR1
616	INPP5F
617	C9orf72
618	GNAQ
619	AUH
620	DIRAS2
621	PBX3
622	NIPSNAP3A
623	SLC31A1
624	MTUS1
625	GARNL3
626	RAB2A
627	ANKRD46
628	PKIA
629	DPYSL2
630	MTMR9
631	TMEM55A
632	SNX16
633	PABPC5
634	DYNLT1
635	VTA1
636	HSF2
637	SERAC1
638	MREG
639	EPB41L5
640	CRK
641	DOPEY2
642	MOAP1
643	NDRG3
644	KIF3B
645	TMEM17
646	TTLL1
647	ATP6V1E1
648	YWHAH
649	NDFIP1
650	MAP1LC3B
651	C16orf80
652	DNAJC12
653	INA
654	SYT11
655	NMNAT2
656	ERC2
657	FBXL2
658	CDKL2
659	REEP2
660	HMP19
661	MLLT11
662	TRIM2
663	PREPL
664	KIF3A
665	ELOVL4
666	TSPYL4
667	STMN4
668	DUSP26
669	FBXO16
670	TSPYL5
671	TUSC3
672	ATP6V1B2
673	GAP43
674	DPYSL3
675	BASP1
676	MMD
677	RAB6B
678	TAGLN3
679	PODXL2
680	PFN2
681	LYSMD1
682	DISP2
683	KIF3C
684	KIF1A
685	SEMA4F
686	SLC1A4
687	ASPHD1
688	SEZ6L2
689	PSD
690	STMN3
691	JPH3
692	DHRS13
693	B4GALNT1
694	SLC29A4
695	CLIP2
696	L1CAM
697	MAPRE3
698	EI24
699	VPS26B
700	FOXRED1
701	PPME1
702	PAK1
703	RAB6A
704	DLG2
705	RAB30
706	B4GALNT4
707	GPR161
708	SARM1
709	ANKRD13B
710	RAI1
711	CNTFR
712	RALGDS
713	SOX4
714	YPEL1
715	ADCY1
716	DOC2B
717	ADRBK2
718	SYN3
719	CLTCL1
720	KCNK10
721	C14orf132
722	AKAP6
723	NRSN1
724	SNAP91
725	RIMS1
726	GSTA4
727	BAI3
728	ANKS1A
729	RIMBP2
730	SOBP
731	CPNE2
732	FOXO3
733	AFAP1
734	TMCO3
735	ADPRHL1
736	BSN
737	LHFPL4
738	PCBP4
739	CLASP2
740	SRGAP3
741	DCLK2
742	BRSK1
743	EID2B
744	FGFBP3
745	FXYD6
746	TMEM25
747	ABCG4
748	BACE1
749	ME3
750	B3GAT1
751	SCN3B
752	NCAM1
753	HOXC9
754	HOXC8
755	FAM124A
756	SLC1A1
757	TAL2
758	ENTPD3
759	CPNE9
760	KNDC1
761	ANK1
762	NELL2
763	PLEKHA8
764	SEC63
765	RMND1
766	DERA
767	FBXO30
768	CDON
769	TNPO1
770	TCF4
771	SMAD1
772	CASP3
773	KCNQ5
774	UNC5C
775	COG5
776	GPR22
777	INSM1
778	C20orf26
779	CERK
780	EGLN3
781	SPTB
782	TSHZ2
783	ENOX2
784	ZC3H7B
785	CAMK4
786	TIAM2
787	SCLY
788	ICA1
789	RAPGEF4
790	EXOC4
791	LRGUK
792	PLCB4
793	FSD1L
794	ADAL
795	OSBPL6
796	LRP8
797	CACNA2D1
798	MYO6
799	KIF13A
800	HACE1
801	TUBE1
802	ARMC2
803	LRRC39
804	HBS1L
805	ALDH8A1
806	CREBZF
807	CCDC84
808	XRRA1
809	DOK6
810	ABR
811	FRY
812	KCNH8
813	GTDC1
814	DIXDC1
815	PTCHD1
816	TMEFF2
817	LONRF2
818	AGPAT4
819	MAP7
820	TRIO
821	PIK3R1
822	DDAH1
823	DGKB
824	GLS
825	PMP22
826	EPB41L3
827	ALDH3A2
828	CITED2
829	EYA4
830	CPNE8
831	ST6GALNAC5
832	CAMK1D
833	ARHGAP26
834	HMBOX1
835	AVIL
836	HECA
837	NRIP1
838	FMNL2
839	CNTNAP5
840	GABRG1
841	LRRC7
842	CNR1
843	ANKRD50
844	SIPA1L2
845	AKAP12
846	SLITRK3
847	NELL1
848	OLFM3
849	CHODL
850	CDH10
851	CDH12
852	KCNMB2
853	HCRTR2
854	GABRG2
855	GABRA1
856	ZNF521
857	GPC6
858	FGD4
859	BTG3
860	DUSP16
861	ST3GAL6
862	IL17RD
863	TNFRSF19
864	ZNF536
865	ITGB8
866	ZMAT4
867	DACH1
868	STOX1
869	KCNN2
870	CPLX3
871	CACHD1
872	ST18
873	RPS6KA2
874	RPH3A
875	APP
876	PAM
877	PCSK2
878	P2RX7
879	GPR155
880	PDZD2
881	SCN7A
882	SPTBN1
883	CAB39L
884	LRRCC1
885	TMEM67
886	SPATA6
887	PLEKHG5
888	RAMP3
889	RASD1
890	BDKRB2
891	SFRP1
892	HRH1
893	SYNPR
894	MYO1D
895	RNF152
896	JUN
897	RHOB
898	GADD45A
899	FOXD1
900	KLF5
901	CD9
902	EGFLAM
903	EPB41L4B
904	ASTN2
905	ARHGAP22
906	PAQR8
907	AMFR
908	CTSF
909	REPS2
910	SV2B
911	ADCY2
912	AKR1C3
913	PHYH
914	STS
915	ARSE
916	PTPRR
917	PTGFR
918	KIAA1804
919	SYT9
920	GPR83
921	LARP6
922	ZNF365
923	NENF
924	PDLIM4
925	KCNK12
926	NMB
927	SLC44A5
928	FAT4
929	IGSF10
930	CALB1
931	L3MBTL4
932	AKAP7
933	AGTR1
934	LUZP2
935	CALN1
936	COMTD1
937	JAG2
938	ACHE
939	TRPV2
940	PRKCD
941	ABCA7
942	UAP1L1
943	PITPNM2
944	CACNG3
945	SCN5A
946	HTR3A
947	HYOU1
948	SLC7A5
949	IRS2
950	GPR108
951	RDH13
952	PFKL
953	ADAMTS10
954	DIRAS1
955	HES4
956	FBN3
957	GRIN1
958	DPP7
959	MCAT
960	PRSS36
961	GPT
962	ABLIM2
963	LGI3
964	PHYHIP
965	DNM1
966	ATP13A2
967	ATP6V0B
968	NCDN
969	MAP1A
970	SULT4A1
971	GABBR1
972	KIF5A
973	ARHGDIG
974	MAP1LC3A
975	SYNGR3
976	PPAPDC3
977	C9orf9
978	C9orf50
979	SH3GLB2
980	FBXO44
981	FBXO2
982	IGSF8
983	LIN7B
984	TMEM130
985	SLC26A11
986	STX1A
987	ATP6V0A1
988	CACNB1
989	SHROOM1
990	NRG2
991	SLC12A5
992	BAIAP3
993	SLC7A4
994	KIAA1324
995	KCNN3
996	SPOCK2
997	SNCB
998	HR
999	EML2
1000	SNCG
1001	YPEL4
1002	IL11
1003	MYH7
1004	ITM2C
1005	NXPH3
1006	IGSF21
1007	PACSIN1
1008	PAK6
1009	EPHA8
1010	ATP2B3
1011	PODNL1
1012	NGB
1013	KRT86
1014	WNT6
1015	WNT10A
1016	GLS2
1017	SLC6A12
1018	PSEN2
1019	EGR4
1020	EPHA10
1021	ALS2CL
1022	ANKRD35
1023	BSPRY
1024	CXXC5
1025	RHBDL3
1026	CAMK2A
1027	SCARA3
1028	CLU
1029	NNAT
1030	BLCAP
1031	B3GALT6
1032	IL17D
1033	NAV1
1034	RTN4RL1
1035	VSNL1
1036	GUCA1B
1037	RGMA
1038	C20orf195
1039	SRCRB4D
1040	MYL7
1041	C1orf94
1042	NMUR1
1043	SCGN
1044	CA8
1045	WRB
1046	PRMT2
1047	LSS
1048	TSPAN7
1049	CLCN4
1050	TRO
1051	GPRASP1
1052	MAGED2
1053	RGAG1
1054	ENO2
1055	FAIM2
1056	CLSTN3
1057	CCDC92
1058	RHBDD2
1059	ATP6V0E2
1060	LIMK1
1061	SYP
1062	TMEM59L
1063	PTPRN
1064	SLC22A17
1065	B3GNT1
1066	PPP2R5B
1067	PCSK1N
1068	SYN1
1069	MAGEE1
1070	NRG1
1071	DYNC1I1
1072	SERGEF
1073	PACRG
1074	RAB15
1075	DNER
1076	FAM134B
1077	KIFAP3
1078	WDR47
1079	SYT1
1080	NRCAM
1081	PJA2
1082	RNF11
1083	SCG2
1084	ME1
1085	RTN4
1086	QPCT
1087	ACYP2
1088	HS6ST3
1089	PKIB
1090	MC4R
1091	CDO1
1092	PPFIA2
1093	HMGCLL1
1094	SH3GL2
1095	AMPH
1096	FSTL5
1097	PCDH10
1098	CA10
1099	INPP1
1100	DNAJB2
1101	GABARAPL1
1102	NDEL1
1103	CDC42
1104	FABP3
1105	DFNA5
1106	SRPK2
1107	UNC5D
1108	SNRPN
1109	ATP1B1
1110	PPP2R2C
1111	NALCN
1112	OLFM1
1113	PFKP
1114	LARGE
1115	LETM2
1116	KCNQ3
1117	GALNT9
1118	FRMPD1
1119	CHGB
1120	ASTN1
1121	VLDLR
1122	CNTNAP4
1123	CARTPT
1124	CCDC68
1125	RAB27B
1126	CAP2
1127	PTP4A1
1128	FRMD3
1129	LRP11
1130	RFK
1131	PTPLA
1132	HMGCR
1133	HMGCS1
1134	ACAT2
1135	SQLE
1136	FDFT1
1137	IDI1
1138	DHCR7
1139	DHCR24
1140	INSIG1
1141	LDLR
1142	FABP6
1143	CCNJL
1144	RAB3C
1145	RAB3A
1146	APBB3
1147	RPP25
1148	ALDOC
1149	CORO2B
1150	PNMA2
1151	ZNF483
1152	CUEDC1
1153	CADM4
1154	ACOT7
1155	STK32C
1156	MVD
1157	DEAF1
1158	MAPK3
1159	CDIPT
1160	NMRAL1
1161	PRRT3
1162	ABHD14A
1163	SLC25A1
1164	PEMT
1165	FAM131A
1166	C14orf79
1167	C20orf27
1168	ARHGDIA
1169	PARD6A
1170	MFSD3
1171	ACLY
1172	STAT3
1173	RND2
1174	MPP2
1175	VAT1
1176	TUBG2
1177	GSTM3
1178	GSTM1
1179	ZFAND2A
1180	DDIT3
1181	NEDD4L
1182	RRAGD
1183	PLEKHB2
1184	SLC17A5
1185	ANKH
1186	MAP7D2
1187	NEFH
1188	ATP1A3
1189	ATP1A1
1190	SYN2
1191	PTPN3
1192	SGPP2
1193	FAM135B
1194	SH3BGR
1195	SNCA
1196	STK32A
1197	SIAE
1198	TCTEX1D1
1199	ABHD12
1200	TCTA
1201	CSPG5
1202	CAMK1
1203	LSAMP
1204	SST
1205	ADCY8
1206	FIBP
1207	PRDX5
1208	TM7SF2
1209	PITPNM1
1210	VEGFB
1211	B3GAT3
1212	SMPD1
1213	PNPLA2
1214	FBXO15
1215	ZCWPW1
1216	ATP6V1E2
1217	GDF9
1218	MYOM2
1219	KATNAL2
1220	NOL3
1221	HSF4
1222	SPAG4
1223	MRM1
1224	KCNJ12
1225	FAM19A5
1226	FAM101A
1227	KCNF1
1228	GLIS1
1229	EDN2
1230	NANOS1
1231	CACNA1C
1232	SLC8A3
1233	GPR27
1234	GLT1D1
1235	BTBD11
1236	FSTL4
1237	DSCAM
1238	KCNIP1
1239	ABCC8
1240	KCNJ11
1241	GPR19
1242	SLC16A14
1243	C17orf58
1244	COCH
1245	SLC6A15
1246	ANKS1B
1247	FAM19A2
1248	HCN1
1249	FRMPD2
1250	TNIK
1251	DLGAP2
1252	SCN1A
1253	TMTC2
1254	RPRM
1255	GALNT13
1256	GREM2
1257	PLD5
1258	ST6GALNAC3
1259	NXPH2
1260	KLHL14
1261	SIX3
1262	ELMO1
1263	RGS13
1264	CLSTN2
1265	NTRK3
1266	CDH8
1267	LRRC4C
1268	SORCS1
1269	ENPP2
1270	SEMA3A
1271	SEMA3E
1272	CACNA1G
1273	POU2F2
1274	FCHO1
1275	KIF21B
1276	RIMS4
1277	OPRL1
1278	LHFPL5
1279	CDK5R2
1280	KLC2
1281	NPTXR
1282	GRIA4
1283	PPM1L
1284	PROKR2
1285	NT5C1A
1286	SHANK2
1287	TNR
1288	SPATA19
1289	GALR2
1290	C17orf77
1291	CLCA4
1292	RHOBTB3
1293	ZC3H13
1294	PHF12
1295	SIGLEC6
1296	TEDDM1
1297	SLC5A1
1298	OR2C3
1299	KCNQ4
1300	OR1F1
1301	TAS2R7
1302	IRX2
1303	SIN3B
1304	SCD
1305	SPATA18
1306	SGOL1
1307	PXMP2
1308	CHRNA5
1309	CEP135
1310	SLC30A3
1311	DNAJC5G
1312	PMFBP1
1313	ZSCAN22
1314	SLC30A2
1315	GJB3
1316	OR8D1
1317	CSN2
1318	PRDM8
1319	SEMA4A
1320	IL12RB1
1321	CCR4
1322	DEFB123
1323	RXFP2
1324	KRTAP9-3
1325	MMP8
1326	GUCA2A
1327	PADI1
1328	ADM2
1329	RGS8
1330	CPA2
1331	CLCN6
1332	SSTR5
1333	GPR112
1334	GLP1R
1335	MBD3L1
1336	SLC6A7
1337	IFNA21
1338	C19orf26
1339	KRT31
1340	CLCN1
1341	CRHR2
1342	GHSR
1343	R3HDML
1344	PI15
1345	G6PC2
1346	IDI2
1347	SPATA3
1348	OTX2
1349	PAX7
1350	IRX1
1351	RPL3L
1352	LRRC3
1353	AMELX
1354	T
1355	TFF2
1356	DEFA6
1357	PAX1
1358	SLC28A1
1359	TRPV6
1360	DMRT1
1361	HCRTR1
1362	HAP1
1363	KRT15
1364	PLEKHG6
1365	C20orf141
1366	ICAM4
1367	ZDHHC19
1368	GAL3ST2
1369	IL19
1370	SPRR3
1371	ADAM33
1372	SLC6A16
1373	EMILIN3
1374	ANKRD33
1375	OR4D2
1376	AMBN
1377	EFNA2
1378	MLANA
1379	MYBPC3
1380	TSSK3
1381	FGF6
1382	CETN1
1383	C6orf10
1384	DCD
1385	DMRTA1
1386	NCR2
1387	UBQLN3
1388	GJB6
1389	TACR1
1390	OR52A1
1391	FOXI1
1392	FLJ30679
1393	BARX2
1394	GPRC5D
1395	WFDC12
1396	RFX4
1397	GPR1
1398	ATP12A
1399	C11orf40
1400	CHRNA2
1401	MIER3
1402	NR5A2
1403	TNFSF8
1404	GPR21
1405	C17orf47
1406	FCHSD1
1407	LY6G6C
1408	SOX3
1409	CLCA2
1410	C21orf62
1411	HFE2
1412	OR7C2
1413	TAAR2
1414	MRGPRX4
1415	FAM71C
1416	PROK1
1417	PHLDB2
1418	SIX2
1419	CRYGA
1420	GPR50
1421	OR12D3
1422	SCN4A
1423	IL25
1424	COL4A6
1425	KCNK6
1426	CYP2S1
1427	IL23R
1428	SOSTDC1
1429	BCL2L10
1430	WNT8B
1431	TMEM31
1432	FXYD7
1433	ATP2A1
1434	FGF19
1435	C20orf85
1436	LECT1
1437	DNAH9
1438	PDE6C
1439	ADIG
1440	TAS2R3
1441	SLC9A2
1442	DSC2
1443	CSF2RB
1444	HSPB6
1445	PLLP
1446	MYOCD
1447	PKP2
1448	TBC1D2B
1449	TMIGD2
1450	WAS
1451	KLK5
1452	TMEM95
1453	GRHL3
1454	TXNDC2
1455	ESRRB
1456	SLC6A18
1457	OR2B2
1458	FUT7
1459	PPP1R1B
1460	MCOLN3
1461	TNFRSF10D
1462	KCNK9
1463	CHRM1
1464	SIM1
1465	CA7
1466	OR11A1
1467	MUC13
1468	OR7A10
1469	OR1Q1
1470	BTN1A1
1471	GSG1
1472	NR6A1
1473	PRSS16
1474	TAAR8
1475	FFAR2
1476	DCST2
1477	MYO1A
1478	DUOXA2
1479	WFDC5
1480	NTSR1
1481	FOXE3
1482	OR7A17
1483	GUCY2D
1484	TSSK1B
1485	REG1A
1486	KCNK7
1487	CECR2
1488	FBXO17
1489	GFAP
1490	IMPG2
1491	OR10H3
1492	CNBD1
1493	OR2H2
1494	GPR32
1495	PSKH2
1496	KITLG
1497	NUP210L
1498	INSL3
1499	IL22RA2
1500	KRT23
1501	KRT7
1502	OVOL2
1503	SHBG
1504	S100A14
1505	HMGCS2
1506	MAT1A
1507	ONECUT1
1508	GYS2
1509	GBA3
1510	CDCA7L
1511	NLRP2
1512	HLF
1513	HRK
1514	MYCN
1515	SPSB4
1516	CACNA1E
1517	GP9
1518	CD4
1519	CHST13
1520	TRIM35
1521	EFCAB4A
1522	PHOX2A
1523	FNBP1
1524	FBXL17
1525	FGF3
1526	CCL24
1527	CYB5R3
1528	TMEM175
1529	SF3A2
1530	OGFR
1531	PIP5K1C
1532	C16orf3
1533	TSPAN10
1534	EVX1
1535	UCN2
1536	NEUROG1
1537	SOX8
1538	ALDOA
1539	TPSG1
1540	EN2
1541	C9orf62
1542	RHBDL1
1543	SYNGR4
1544	HES7
1545	PAX2
1546	CDC42EP5
1547	GPR153
1548	COX6A2
1549	PARP10
1550	GALR3
1551	POU3F3
1552	ZSCAN10
1553	ZNF579
1554	GRIN2D
1555	UTS2R
1556	FCRLB
1557	FOXQ1
1558	IER5
1559	NFIC
1560	SCARF2
1561	CACNA1I
1562	KLF16
1563	RAVER1
1564	SOX1
1565	NEUROG3
1566	ZNF575
1567	ZNF205
1568	NPBWR1
1569	SPATA2L
1570	MGC45922
1571	KISS1R
1572	SOX18
1573	FOXC2
1574	SOX17
1575	HS3ST1
1576	GPSM3
1577	IRX3
1578	LGR4
1579	PLA2G2D
1580	KCNJ10
1581	RGR
1582	A2ML1
1583	C15orf26
1584	CAPSL
1585	CABP4
1586	CST2
1587	SCN1B
1588	OR3A2
1589	PDLIM2
1590	CEACAM1
1591	SPN
1592	CD7
1593	CD3E
1594	KLHDC7B
1595	PTGDR
1596	SP100
1597	PLD4
1598	CD209
1599	EVPL
1600	ATG9B
1601	IL10
1602	DUSP13
1603	BMP3
1604	TGM7
1605	CPA5
1606	MYBPC2
1607	COL4A3
1608	LDB2
1609	ZHX2
1610	AQP8
1611	RXFP3
1612	P2RY4
1613	SLC17A7
1614	LHX1
1615	COL6A1
1616	NDST4
1617	KLF1
1618	SPINK1
1619	CHST4
1620	PRAP1
1621	TM4SF5
1622	CYP2A13
1623	SLC39A5
1624	OLIG3
1625	TNFSF9
1626	CD300LG
1627	GPHA2
1628	PRDM7
1629	TAS2R39
1630	OR1D2
1631	GPR55
1632	CHRDL1
1633	ARHGEF15
1634	SLC6A19
1635	GNAZ
1636	AHDC1
1637	TSNARE1
1638	ADAMTS13
1639	DLX3
1640	P2RX1
1641	LGALS12
1642	FIBCD1
1643	GNG13
1644	LY6G5C
1645	UCN3
1646	MYH14
1647	FOXD3
1648	C17orf74
1649	ZNF784
1650	C9orf163
1651	SNX22
1652	IRX4
1653	C1orf158
1654	DPEP3
1655	RASGRP4
1656	PLA2G4F
1657	NYX
1658	MOS
1659	ERN2
1660	AQP2
1661	ADRA1D
1662	TMEM105
1663	SPRR1A
1664	KRT3
1665	TERT
1666	PRM3
1667	ARTN
1668	MTMR11
1669	FBN2
1670	ST8SIA5
1671	MOCOS
1672	MC2R
1673	CYP11A1
1674	AGRP
1675	CACNA1H
1676	PLEKHN1
1677	NKD2
1678	SLC12A7
1679	FCGBP
1680	RHPN1
1681	ADAD2
1682	YBX2
1683	MADCAM1
1684	OTOF
1685	B3GNT8
1686	PTGER1
1687	GP5
1688	ZNF169
1689	BCMO1
1690	ADAM7
1691	PSORS1C2
1692	FSHR
1693	FSHB
1694	ABCC13
1695	LDHC
1696	ENTPD2
1697	CASQ1
1698	AVPR2
1699	LCE2B
1700	OR2F1
1701	GPX5
1702	SPATA12
1703	USH1C
1704	KRT37
1705	SLC7A13
1706	PKP3
1707	FAT2
1708	CAPN9
1709	KCNA10
1710	POU2F3
1711	RDH8
1712	BRS3
1713	CST11
1714	BMP15
1715	LTA
1716	CRB3
1717	CDSN
1718	PAX4
1719	ENPP7
1720	XCR1
1721	CABP5
1722	TNP2
1723	OR6A2
1724	TECTB
1725	POU1F1
1726	RTN4RL2
1727	OXER1
1728	SLC29A2
1729	SH3BP1
1730	SEMA4B
1731	IL17RE
1732	PVALB
1733	C6orf15
1734	CLDN2
1735	KAAG1
1736	CTF1
1737	C10orf91
1738	BTBD16
1739	SLC38A3
1740	APCS
1741	KCNS2
1742	NRG4
1743	SPATA8
1744	OLIG2
1745	CLDN11
1746	NOS1
1747	ALPI
1748	HRH2
1749	NKX2-5
1750	ZNF446
1751	GPR12
1752	GPRC6A
1753	CHRM5
1754	KY
1755	FAM131C
1756	SLC16A8
1757	TNNT2
1758	MET
1759	SLC16A4
1760	MYADM
1761	STC1
1762	CPA3
1763	HDC
1764	SERPINB2
1765	ROGDI
1766	B4GALT2
1767	COPS7A
1768	FAM104A
1769	MAP6D1
1770	PRLHR
1771	PFKFB3
1772	SLC14A1
1773	THEG
1774	NPHS2
1775	KIAA1161
1776	FOXR1
1777	PI3
1778	ARHGAP1
1779	TRIM21
1780	MEGF11
1781	MEP1A
1782	GCNT3
1783	SERPINA4
1784	CRY2
1785	CX3CL1
1786	PITX1
1787	CHPF
1788	ARID3A
1789	MMP14
1790	NPM2
1791	CDK4
1792	SPACA1
1793	OR2C1
1794	IL1F10
1795	GLRA3
1796	NODAL
1797	SYT8
1798	WDR64
1799	CHST6
1800	RIN1
1801	FRZB
1802	UTRN
1803	FLRT2
1804	PPFIBP1
1805	TXNIP
1806	PNRC1
1807	FOXO1
1808	PIK3IP1
1809	PIK3CD
1810	ANKRD29
1811	LAMA3
1812	PELI2
1813	CTTNBP2
1814	AHSA2
1815	TRAF5
1816	GCC2
1817	NT5DC1
1818	CYP4V2
1819	KLKB1
1820	ARL4C
1821	PDLIM3
1822	PDE4B
1823	LRRFIP1
1824	SYNJ2
1825	SMARCA2
1826	ENPP1
1827	SYNE1
1828	SDC2
1829	HBP1
1830	PPP1R3B
1831	TEK
1832	CCDC28A
1833	ARHGAP12
1834	EDIL3
1835	KCNAB1
1836	PDE3A
1837	SLCO1C1
1838	AGT
1839	NTF3
1840	MANSC1
1841	B3GNT2
1842	ACVR1
1843	TPD52
1844	LIN7A
1845	VAMP1
1846	PDE1C
1847	PMAIP1
1848	CHL1
1849	NLGN1
1850	SERPINI1
1851	HTR7
1852	LGI2
1853	LRRC1
1854	CRISPLD1
1855	LRRN1
1856	CNTN4
1857	GUCY1B3
1858	GUCY1A3
1859	ARHGAP29
1860	DOCK9
1861	FILIP1
1862	SNX7
1863	ABCB1
1864	WWC2
1865	PARP4
1866	ATP10D
1867	PKD2
1868	PTPRG
1869	ANTXR1
1870	L1TD1
1871	PDZRN3
1872	MGC24103
1873	COL11A1
1874	MATN3
1875	KCNS3
1876	RELN
1877	PLCE1
1878	NFIB
1879	PKP4
1880	PRKD3
1881	BARD1
1882	ARHGAP10
1883	PRDM5
1884	GULP1
1885	LZTS1
1886	DIO3
1887	IL17B
1888	ADORA2B
1889	TTC25
1890	EFHC1
1891	TMEM107
1892	LRRC48
1893	MORN3
1894	KIAA1407
1895	TTC18
1896	WDR66
1897	NPHP1
1898	LRRC6
1899	CCDC104
1900	DYNC2LI1
1901	MAP9
1902	PHTF1
1903	LRRIQ1
1904	SPAG6
1905	NME5
1906	CASC1
1907	C6orf165
1908	KSR2
1909	KCNC2
1910	KLHL32
1911	SLC4A10
1912	GRM1
1913	SGCE
1914	PEG10
1915	ZNF226
1916	HOXC10
1917	CDH9
1918	KLHL1
1919	SYT4
1920	RIT2
1921	HPCAL4
1922	KIAA0319
1923	TPST1
1924	SNX10
1925	TMCC3
1926	DKK3
1927	ENDOD1
1928	EPDR1
1929	PAPPA
1930	NAP1L2
1931	LNX1
1932	HTR2A
1933	RYR3
1934	BMPER
1935	EPS15
1936	DNAJB4
1937	STX7
1938	FGF7
1939	PDE7B
1940	PLB1
1941	B3GALT2
1942	CNTN5
1943	HIVEP1
1944	LONRF1
1945	CCPG1
1946	DYNLT3
1947	UBL3
1948	CHMP2B
1949	SPG20
1950	MYRIP
1951	NHS
1952	PTN
1953	PCSK1
1954	RBM24
1955	ALDH5A1
1956	GPLD1
1957	PTPRT
1958	NEFL
1959	CNTNAP1
1960	LRP1B
1961	NRXN1
1962	SEMA3C
1963	IL1RAPL1
1964	TMEM117
1965	SORCS3
1966	FEZ1
1967	NLGN3
1968	CNTN2
1969	WBSCR17
1970	GABRB1
1971	GABRA2
1972	GRIA3
1973	CORIN
1974	SUMF2
1975	CPT2
1976	FBP1
1977	ACSL1
1978	MAN2B2
1979	CCDC96
1980	AIFM2
1981	LHPP
1982	SPATA20
1983	HPCAL1
1984	HPCA
1985	SPRYD3
1986	EHD3
1987	NRIP3
1988	SNX21
1989	IGSF1
1990	PPM1J
1991	RASGEF1A
1992	SELM
1993	PTGES
1994	PIR
1995	FIGF
1996	KCNK5
1997	RND1
1998	SLC44A3
[truncated: 3,794 more rows]
