# Supplementary material for: Identification of MYCN non-amplified neuroblastoma subgroups points towards molecular signatures for precision prognosis and therapy stratification
Source: Research Square preprint supplement (doi:10.21203/rs.3.rs-478917/v1), 2021-05-28
Supplement: Supplementary file 6 [file 80cd9ddeeffb5b0b08d2449c.xlsx]

## Sheet: GSEA Analysis
Table S5. GSEA (gene set enrichment analysis) in subgroups.
Hallmark	NES (Subgroup_1 vs Subgroup_(2+3))	NES (2 vs (1+3))	NES (3 vs (1+2))	FDR (1 vs (2+3))	FDR (2 vs (1+3))	FDR (3 vs (1+2))
KRAS_SIGNALING_UP	-1.28845	-1.41488	1.70901	0.359067	0.465494	0.0350224		GSEA: gene set enrichment analysis
ALLOGRAFT_REJECTION	-1.52701	-1.21496	1.72237	0.375584	0.432987	0.036567		NES: normalized enrichment score
TGF_BETA_SIGNALING	-1.44875	-1.19116	1.7096	0.206688	0.444949	0.0376191		FDR: false discovery rate
INTERFERON_GAMMA_RESPONSE	-1.56677	-1.24565	1.72858	0.475292	0.435878	0.0379591
IL2_STAT5_SIGNALING	-1.46388	-1.2797	1.77481	0.25878	0.410448	0.0394971
ADIPOGENESIS	-1.16397	-0.952826	1.67587	0.389373	0.609065	0.0400238
APICAL_JUNCTION	-1.02224	-1.44087	1.73511	0.53381	0.565635	0.0404075
HYPOXIA	-1.34564	-1.11378	1.67597	0.289407	0.494637	0.0431025
EPITHELIAL_MESENCHYMAL_TRANSITION	-1.18773	-1.37717	1.65525	0.385239	0.35724	0.043438
REACTIVE_OXYGEN_SPECIES_PATHWAY	-1.48727	-0.408847	1.6608	0.311534	0.989964	0.0434695
COMPLEMENT	-1.46391	-1.30355	1.78702	0.284658	0.397784	0.0437019
UV_RESPONSE_UP	-1.26307	0.762722	1.63605	0.35028	0.720813	0.0456959
IL6_JAK_STAT3_SIGNALING	-1.45338	-1.15489	1.73753	0.232314	0.453775	0.0460086
INTERFERON_ALPHA_RESPONSE	-1.48099	-1.31537	1.62101	0.288818	0.404968	0.0475645
ESTROGEN_RESPONSE_EARLY	-1.45707	-0.930964	1.6371	0.2472	0.600686	0.0478832
COAGULATION	-1.36307	-1.42008	1.62318	0.280249	0.529249	0.0491312
TNFA_SIGNALING_VIA_NFKB	-1.40165	-1.39639	1.73991	0.257212	0.396834	0.0524379
INFLAMMATORY_RESPONSE	-1.49785	-1.22765	1.78785	0.329558	0.437036	0.0582692
CHOLESTEROL_HOMEOSTASIS	-1.17355	-0.819285	1.58148	0.390197	0.702948	0.0618955
ANGIOGENESIS	-1.12593	-1.38337	1.55057	0.415643	0.379543	0.0686408
MYOGENESIS	-0.994953	-1.44652	1.55524	0.556038	0.685913	0.0690436
APICAL_SURFACE	-0.796827	-1.66178	1.55573	0.735579	0.615485	0.0717663
XENOBIOTIC_METABOLISM	-1.21698	-1.03395	1.5368	0.38577	0.549735	0.073066
APOPTOSIS	-1.37137	-1.37057	1.80709	0.284407	0.337224	0.0763605
ESTROGEN_RESPONSE_LATE	-1.57152	0.993205	1.50281	0.685428	0.456199	0.0873534
P53_PATHWAY	-1.59478	-1.06067	1.84794	1	0.530834	0.0973656
NOTCH_SIGNALING	-1.13713	-1.15986	1.4452	0.414304	0.469542	0.116541
UV_RESPONSE_DN	-0.742124	-1.59147	1.42414	0.763913	0.517623	0.126335
ANDROGEN_RESPONSE	-1.09421	-1.07521	1.37538	0.447629	0.532435	0.149509
FATTY_ACID_METABOLISM	-0.861123	-0.973725	1.3766	0.668444	0.619162	0.154253
PI3K_AKT_MTOR_SIGNALING	-1.26445	1.04668	1.34933	0.364473	0.46621	0.16537
BILE_ACID_METABOLISM	-0.868875	-0.929203	1.33224	0.67315	0.583996	0.167984
HEME_METABOLISM	-0.992172	-0.823628	1.33802	0.544897	0.718019	0.16897
PEROXISOME	-0.804501	-0.738051	1.30371	0.742082	0.802999	0.179126
WNT_BETA_CATENIN_SIGNALING	-0.776439	-1.49113	1.3077	0.732579	0.71284	0.181564
UNFOLDED_PROTEIN_RESPONSE	-1.45042	1.59164	1.28095	0.219134	0.0474453	0.192499
MYC_TARGETS_V1	-0.964401	2.18961	-1.58999	0.568885	0	0.219558
SPERMATOGENESIS	-0.789133	1.69254	-1.41262	0.730103	0.027936	0.225223
E2F_TARGETS	-1.24699	1.87846	-1.47577	0.359133	0.0110046	0.23011
GLYCOLYSIS	-1.20717	1.02027	1.228	0.387171	0.458563	0.230792
G2M_CHECKPOINT	-1.20143	1.8218	-1.35108	0.379366	0.0116949	0.236028
MITOTIC_SPINDLE	-0.876088	1.76785	-1.29313	0.680771	0.017739	0.248742
MTORC1_SIGNALING	-1.50295	1.59638	1.10648	0.370058	0.0513526	0.339675
PANCREAS_BETA_CELLS	1.02344	-0.70276	-1.12113	0.787783	0.827	0.384562
PROTEIN_SECRETION	0.639815	-0.933824	1.0309	0.871482	0.617658	0.41044
KRAS_SIGNALING_DN	0.766398	-0.962621	1.00789	0.951615	0.614224	0.427503
HEDGEHOG_SIGNALING	1.40797	-1.4102	-0.887104	0.3621	0.418802	0.546356
DNA_REPAIR	-1.2799	2.27216	-0.909582	0.355677	0	0.591379
MYC_TARGETS_V2	-1.54645	1.86907	0.520588	0.411011	0.00870942	0.98137
OXIDATIVE_PHOSPHORYLATION	-0.667575	1.19221	0.425177	0.846486	0.326886	0.984085
