# Supplementary material for: Identification of MYCN non-amplified neuroblastoma subgroups points towards molecular signatures for precision prognosis and therapy stratification
Source: Research Square preprint supplement (doi:10.21203/rs.3.rs-478917/v1), 2021-05-28
Supplement: Supplementary file 7 [file 9ebd0fa1e67102df32dc08b9.xlsx]

## Sheet: WGCNA Module
Table S6. WGCNA (weighted gene co-expression network analysis) in subgroups.
Gene	Color
PAGE5	turquoise
BMP7	turquoise
EYA4	turquoise
SEMA3E	turquoise
DLK1	turquoise
SST	turquoise
POF1B	turquoise
NPTX2	turquoise
ACTN2	turquoise
GPR22	turquoise
LEMD1	turquoise
ASCL1	turquoise
MAGEA1	turquoise
GNGT1	turquoise
HS3ST5	turquoise
SH3GL3	turquoise
NPY	turquoise
CRYBA2	turquoise
EYA1	turquoise
NMNAT3	turquoise
DSCAM	turquoise
LDHAL6A	turquoise
FOXN4	turquoise
SLC18A1	turquoise
HIST1H1A	turquoise
ANKFN1	turquoise
AMH	turquoise
NPY2R	turquoise
TAC3	turquoise
LY6H	turquoise
NUF2	turquoise
CENPF	turquoise
TCERG1L	turquoise
PBK	turquoise
CCDC68	turquoise
FEV	turquoise
KRT19	turquoise
C1QTNF2	turquoise
DTL	turquoise
CCBE1	turquoise
LRRC4C	turquoise
ZMAT4	turquoise
CDCA5	turquoise
MKI67	turquoise
UBE2C	turquoise
SORCS1	turquoise
TG	turquoise
CKAP2L	turquoise
BIRC5	turquoise
NTRK1	turquoise
NCAPG	turquoise
KCNQ2	turquoise
KIF20A	turquoise
EPHA5	turquoise
ASPM	turquoise
HS3ST4	turquoise
SPC25	turquoise
PTTG1	turquoise
TK1	turquoise
TROAP	turquoise
FAM64A	turquoise
IGF2BP1	turquoise
EXO1	turquoise
RHBG	turquoise
EGLN3	turquoise
PTPRR	turquoise
TYMS	turquoise
MAGEA4	turquoise
KIF15	turquoise
PRUNE2	turquoise
KIF2C	turquoise
CTAG2	turquoise
MKRN3	turquoise
HIST1H1C	turquoise
CEP55	turquoise
TTK	turquoise
CENPA	turquoise
MELK	turquoise
TPX2	turquoise
RRM2	turquoise
PCDH8	turquoise
MAD2L1	turquoise
GFRA2	turquoise
MAB21L2	turquoise
RAD51	turquoise
CDCA8	turquoise
FAM83D	turquoise
GINS2	turquoise
NTNG1	turquoise
CDKN3	turquoise
FAT4	turquoise
CRYGC	turquoise
NDST3	turquoise
INSM1	turquoise
CDH7	turquoise
BCL11A	turquoise
PNMT	turquoise
MYBL2	turquoise
ALK	turquoise
GNG8	turquoise
STK33	turquoise
E2F1	turquoise
NCAPH	turquoise
ALS2CR11	turquoise
KIF18A	turquoise
RAD51AP1	turquoise
NEK2	turquoise
ZNF804A	turquoise
IRX5	turquoise
POPDC3	turquoise
CCNA1	turquoise
FOXM1	turquoise
SLC27A2	turquoise
HS6ST2	turquoise
GRM8	turquoise
PGAM2	turquoise
SEMA3D	turquoise
NDUFA4L2	turquoise
BDKRB1	turquoise
MCM10	turquoise
NXPH1	turquoise
PCDHB6	turquoise
NUSAP1	turquoise
MPP6	turquoise
BUB1	turquoise
GPR26	turquoise
CDC25C	turquoise
KIAA1683	turquoise
FANCI	turquoise
TMTC2	turquoise
ANLN	turquoise
OIP5	turquoise
CCNA2	turquoise
NDC80	turquoise
C1QL1	turquoise
CDCA2	turquoise
PTCHD1	turquoise
AURKA	turquoise
CCNB1	turquoise
GTSE1	turquoise
MAGEA10	turquoise
GATA2	turquoise
TCEAL2	turquoise
OSBPL3	turquoise
KCNG1	turquoise
MYO15A	turquoise
COL9A2	turquoise
CDC6	turquoise
KIF11	turquoise
PCDHB2	turquoise
PRPH2	turquoise
ZWINT	turquoise
DNER	turquoise
HIST1H1B	turquoise
SYT13	turquoise
MEIS1	turquoise
E2F8	turquoise
AJAP1	turquoise
E2F7	turquoise
HMGB2	turquoise
HMX1	turquoise
CENPN	turquoise
SLITRK5	turquoise
SLC6A2	turquoise
KIF4A	turquoise
PTTG2	turquoise
LRRC7	turquoise
CENPE	turquoise
HMMR	turquoise
TACC3	turquoise
IGSF9	turquoise
SEMA3A	turquoise
KLHL13	turquoise
NEIL3	turquoise
MAGEA8	turquoise
RET	turquoise
PGM2L1	turquoise
CLSTN2	turquoise
HIST1H4D	turquoise
CNTN1	turquoise
BLM	turquoise
CENPK	turquoise
PCDHB10	turquoise
ACRV1	turquoise
POLQ	turquoise
TIAM2	turquoise
PLD5	turquoise
CKS2	turquoise
PRC1	turquoise
ERCC6L	turquoise
CHST1	turquoise
CDKN2A	turquoise
SPAG6	turquoise
KIF23	turquoise
PCDHB18	turquoise
SLC18A2	turquoise
EPHB3	turquoise
NMU	turquoise
PVRL3	turquoise
MND1	turquoise
MDGA1	turquoise
CHEK1	turquoise
CDC20	turquoise
HIST1H1D	turquoise
CAMK4	turquoise
FNDC5	turquoise
PLK1	turquoise
KIF14	turquoise
DLEU7	turquoise
RAPGEF4	turquoise
SAMD11	turquoise
CNR1	turquoise
FAM111B	turquoise
FBXO5	turquoise
TSPAN2	turquoise
DLL3	turquoise
CENPH	turquoise
CAMKV	turquoise
CENPM	turquoise
CROT	turquoise
KRT33A	turquoise
CDT1	turquoise
CNTNAP2	turquoise
C9orf24	turquoise
NAALAD2	turquoise
PKMYT1	turquoise
PCDHB4	turquoise
ONECUT2	turquoise
BTBD3	turquoise
NEGR1	turquoise
INSM2	turquoise
CDCA7	turquoise
FZD5	turquoise
TFAP2B	turquoise
CASC5	turquoise
DHRS2	turquoise
PCDHB7	turquoise
ZFPM2	turquoise
TLN2	turquoise
DHDH	turquoise
SPAG5	turquoise
MCM2	turquoise
RGS5	turquoise
CHGA	turquoise
KCND2	turquoise
MAB21L1	turquoise
CBLN1	turquoise
SPA17	turquoise
SYN3	turquoise
ICA1	turquoise
PLCD4	turquoise
MAP7	turquoise
LRRIQ1	turquoise
MAOA	turquoise
PPEF1	turquoise
ISL1	turquoise
PIK3R1	turquoise
ARHGAP11A	turquoise
GNAS	turquoise
TOX	turquoise
HIST1H4L	turquoise
ENDOG	turquoise
PTPN5	turquoise
MYB	turquoise
PNCK	turquoise
TRIM55	turquoise
CYB561	turquoise
DEPDC1B	turquoise
ECT2	turquoise
DHCR24	turquoise
FLRT3	turquoise
RGS4	turquoise
RBP1	turquoise
PCDHB15	turquoise
PLXNA2	turquoise
PTPRD	turquoise
DEPDC1	turquoise
GPR98	turquoise
SLFNL1	turquoise
FANCA	turquoise
CDKN2C	turquoise
EME1	turquoise
F12	turquoise
KCNN1	turquoise
SYT3	turquoise
SDK2	turquoise
NETO1	turquoise
ARSF	turquoise
ALCAM	turquoise
LMNB1	turquoise
LMO1	turquoise
FRMD3	turquoise
ADCY8	turquoise
PCDH17	turquoise
CXorf57	turquoise
PCDHB17	turquoise
CACNA2D3	turquoise
PTPRO	turquoise
AMHR2	turquoise
ROBO1	turquoise
SPINK5	turquoise
SGOL2	turquoise
TBX2	turquoise
PPFIA2	turquoise
KLK1	turquoise
RACGAP1	turquoise
SLCO3A1	turquoise
KCNK10	turquoise
LYPD6	turquoise
SNCAIP	turquoise
SPOCK1	turquoise
NRCAM	turquoise
PCDHB16	turquoise
MCC	turquoise
NKX6-1	turquoise
SH3GL2	turquoise
BRIP1	turquoise
TEKT2	turquoise
PCNA	turquoise
LIN28B	turquoise
PNMA6A	turquoise
GSG2	turquoise
HSD11B2	turquoise
FLJ33360	turquoise
PSAT1	turquoise
ANKS1A	turquoise
RGS7	turquoise
SYT1	turquoise
GPR56	turquoise
ELAVL2	turquoise
GALNT13	turquoise
KIAA1324	turquoise
RPL39L	turquoise
HIST1H2BB	turquoise
RAB3C	turquoise
PLXNC1	turquoise
CHAF1A	turquoise
WSB1	turquoise
ASF1B	turquoise
KCNH8	turquoise
NUP62CL	turquoise
HIST1H3I	turquoise
POLA2	turquoise
H1F0	turquoise
XK	turquoise
CBX8	turquoise
SHD	turquoise
DIAPH3	turquoise
DERA	turquoise
GPR158	turquoise
EBF1	turquoise
BAI3	turquoise
SYT6	turquoise
RGS17	turquoise
PC	turquoise
CLSPN	turquoise
SYTL4	turquoise
KCNB2	turquoise
CRYGD	turquoise
PPARGC1A	turquoise
HIST1H4I	turquoise
HIST1H1E	turquoise
ABCG4	turquoise
MFAP2	turquoise
SLC6A15	turquoise
DPP6	turquoise
CHRNA3	turquoise
RNASEH2A	turquoise
ENOX1	turquoise
HIST1H2BG	turquoise
MCM6	turquoise
E2F2	turquoise
COG5	turquoise
CMBL	turquoise
HIST1H3B	turquoise
HIST1H4F	turquoise
SMC4	turquoise
NELL2	turquoise
ATAD2	turquoise
KIAA1804	turquoise
DRD5	turquoise
FLRT1	turquoise
ST6GALNAC3	turquoise
CCNB2	turquoise
GCH1	turquoise
DIRAS2	turquoise
RIBC2	turquoise
HIST2H2BE	turquoise
SMC2	turquoise
TMEM132D	turquoise
PCDH7	turquoise
HIST1H2BD	turquoise
TMEM98	turquoise
PDE11A	turquoise
HIST1H2AE	turquoise
EFNB2	turquoise
EPB41L4A	turquoise
CNKSR2	turquoise
GRIA2	turquoise
KNTC1	turquoise
CDC25A	turquoise
NETO2	turquoise
BCL2	turquoise
TMEM108	turquoise
HIST1H2BM	turquoise
HSPA4L	turquoise
SHMT2	turquoise
CCDC136	turquoise
C10orf107	turquoise
RAB27B	turquoise
PPP1R1C	turquoise
ACVR2B	turquoise
DDC	turquoise
TRIP13	turquoise
UBE2T	turquoise
ERC2	turquoise
UNC5C	turquoise
LRRTM2	turquoise
KIAA0101	turquoise
NTS	turquoise
GAP43	turquoise
DCX	turquoise
MYOM2	turquoise
SYCP2	turquoise
PTPLA	turquoise
HMGB3	turquoise
BARD1	turquoise
NCOA7	turquoise
SCN2A	turquoise
GLRB	turquoise
ALDH3A2	turquoise
ZNF214	turquoise
EXOC4	turquoise
CDK6	turquoise
HELLS	turquoise
HIST1H3F	turquoise
MAGEC1	turquoise
C20orf96	turquoise
GALNT6	turquoise
RECQL4	turquoise
KIF24	turquoise
MTL5	turquoise
LDHA	turquoise
CENPO	turquoise
BRCA2	turquoise
MDK	turquoise
CIT	turquoise
POLE2	turquoise
LRRN3	turquoise
PLK4	turquoise
GGH	turquoise
LINGO2	turquoise
NANOS1	turquoise
HMGCS1	turquoise
KCNH5	turquoise
MCM8	turquoise
TMEM97	turquoise
TCAP	turquoise
CDKN1C	turquoise
ZNF503	turquoise
HIST1H2BO	turquoise
AHI1	turquoise
FRY	turquoise
KCNJ6	turquoise
PCDHB8	turquoise
GSTO2	turquoise
ADCY1	turquoise
SLC8A1	turquoise
ZNF43	turquoise
TEKT3	turquoise
HIST1H2BE	turquoise
TRIB2	turquoise
GNAI1	turquoise
DCC	turquoise
ARHGAP21	turquoise
SEZ6L	turquoise
BMPR1B	turquoise
VWCE	turquoise
TBX20	turquoise
GINS1	turquoise
ZNF83	turquoise
RAD54L	turquoise
GNG4	turquoise
GSTM1	turquoise
MEST	turquoise
HMP19	turquoise
TBC1D8	turquoise
ZNF233	turquoise
CLUL1	turquoise
SEMA6A	turquoise
ZNF254	turquoise
RFC5	turquoise
CDCA7L	turquoise
HECW1	turquoise
HOXD3	turquoise
HIST1H2AC	turquoise
ADRBK2	turquoise
NKX6-2	turquoise
DDX25	turquoise
DBF4	turquoise
HBS1L	turquoise
STIL	turquoise
DOCK10	turquoise
TAL2	turquoise
ULK2	turquoise
LIN7A	turquoise
INSRR	turquoise
PRKY	turquoise
SLC1A2	turquoise
DOCK4	turquoise
STAC	turquoise
CORO2A	turquoise
CCNE2	turquoise
ARID3B	turquoise
LONRF2	turquoise
KBTBD6	turquoise
RASL11B	turquoise
MTSS1	turquoise
CCND1	turquoise
RAMP1	turquoise
GNG3	turquoise
SLC26A10	turquoise
HIST1H2AL	turquoise
ZNF208	turquoise
POLD1	turquoise
ESPL1	turquoise
SLC7A14	turquoise
DOC2B	turquoise
RHBDD2	turquoise
XRCC2	turquoise
WFIKKN1	turquoise
CNTFR	turquoise
NUDT1	turquoise
RRM1	turquoise
LPHN3	turquoise
VLDLR	turquoise
FANCD2	turquoise
CBS	turquoise
UHRF1	turquoise
DUSP26	turquoise
HIST1H2BC	turquoise
PROX1	turquoise
SHC3	turquoise
HIST1H2BK	turquoise
TMEM55A	turquoise
GRIK1	turquoise
MAPK8IP1	turquoise
NRSN1	turquoise
MYO1B	turquoise
POU2F2	turquoise
DDX17	turquoise
GRIK2	turquoise
ZNF423	turquoise
GPR19	turquoise
KCNH6	turquoise
CHAF1B	turquoise
CACNB4	turquoise
FDXR	turquoise
TTLL6	turquoise
FBXO30	turquoise
MAGEA11	turquoise
ZNF675	turquoise
RAB3IP	turquoise
TP53I3	turquoise
B3GALT1	turquoise
FAIM2	turquoise
IGF2BP3	turquoise
ODC1	turquoise
ETNK2	turquoise
TCF19	turquoise
CASP3	turquoise
GARNL3	turquoise
SYP	turquoise
PAK7	turquoise
CTNND2	turquoise
PSD2	turquoise
PHYHIPL	turquoise
CACNG1	turquoise
DSEL	turquoise
SAC3D1	turquoise
SLC10A4	turquoise
FIGN	turquoise
SLC16A10	turquoise
DPF1	turquoise
DLC1	turquoise
HOXD1	turquoise
TFRC	turquoise
DDB2	turquoise
ZNF107	turquoise
KIF5C	turquoise
GPR85	turquoise
DSN1	turquoise
BIVM	turquoise
LMNB2	turquoise
SLC4A8	turquoise
KIF21A	turquoise
STARD4	turquoise
CHRNB4	turquoise
DNAJC12	turquoise
PCDHB9	turquoise
CKAP2	turquoise
SUV39H2	turquoise
E2F3	turquoise
DHCR7	turquoise
PTPLAD1	turquoise
GAS2L3	turquoise
PRRT2	turquoise
PAK2	turquoise
AGBL4	turquoise
OBSCN	turquoise
WDR34	turquoise
ZNF367	turquoise
WFDC2	turquoise
RNF182	turquoise
TMEM74	turquoise
RFC3	turquoise
CPXM1	turquoise
AFF2	turquoise
SULT4A1	turquoise
H1FX	turquoise
CENPJ	turquoise
ZWILCH	turquoise
CSRP2	turquoise
TAS2R10	turquoise
DAGLA	turquoise
PNPLA3	turquoise
C16orf59	turquoise
RAB11FIP4	turquoise
CBFB	turquoise
HFM1	turquoise
CADPS	turquoise
SHF	turquoise
DDX26B	turquoise
UCN	turquoise
SEMA6D	turquoise
NSUN6	turquoise
ACRBP	turquoise
MIPEP	turquoise
TTC8	turquoise
SOCS2	turquoise
ZNF354A	turquoise
NT5DC2	turquoise
PCDHB11	turquoise
CDC7	turquoise
FJX1	turquoise
RMI1	turquoise
ANK3	turquoise
TIMELESS	turquoise
CDCA3	turquoise
ATP8A1	turquoise
PRTFDC1	turquoise
JAKMIP1	turquoise
FOXO3	turquoise
KLF12	turquoise
CHEK2	turquoise
ADSSL1	turquoise
KLHL32	turquoise
SCN3A	turquoise
RIMS1	turquoise
SSBP2	turquoise
DBNDD1	turquoise
DYRK4	turquoise
STH	turquoise
FGD6	turquoise
DPY19L2P4	turquoise
SRGAP1	turquoise
SRGAP3	turquoise
SERINC1	turquoise
ACOT7	turquoise
NRP2	turquoise
BAZ2B	turquoise
TRAM1L1	turquoise
PROCA1	turquoise
COL9A1	turquoise
TARBP1	turquoise
EFCAB2	turquoise
SLC1A1	turquoise
SOX11	turquoise
ATRNL1	turquoise
GJC1	turquoise
STMN4	turquoise
RTN4R	turquoise
STRA6	turquoise
CDS1	turquoise
MYH3	turquoise
CECR6	turquoise
LRP5L	turquoise
KCNB1	turquoise
TOPBP1	turquoise
ELOVL2	turquoise
TMPO	turquoise
AKAP6	turquoise
NAT8L	turquoise
DYNLRB2	turquoise
RBMS3	turquoise
AKAP9	turquoise
ZNF652	turquoise
NXT2	turquoise
DMC1	turquoise
B4GALNT4	turquoise
ZNF681	turquoise
SQLE	turquoise
INCENP	turquoise
TOM1L1	turquoise
GADD45G	turquoise
ST8SIA1	turquoise
ENO3	turquoise
SLAIN1	turquoise
PRPF19	turquoise
CDKL2	turquoise
WNT5B	turquoise
MBTD1	turquoise
SYN2	turquoise
SNX16	turquoise
ZNF618	turquoise
KATNAL2	turquoise
TSHZ3	turquoise
COCH	turquoise
FGF17	turquoise
ANKS1B	turquoise
BASP1	turquoise
FDFT1	turquoise
PVRL1	turquoise
OLA1	turquoise
SORBS2	turquoise
MPPED2	turquoise
TM7SF2	turquoise
TRAIP	turquoise
MCM4	turquoise
ZNF57	turquoise
MLF1	turquoise
PCDHB14	turquoise
USP44	turquoise
DPF3	turquoise
DNMT3B	turquoise
FADS1	turquoise
PSMC3IP	turquoise
RBM3	turquoise
ELOVL4	turquoise
EIF5A	turquoise
ST8SIA4	turquoise
HIST1H2AM	turquoise
CEP72	turquoise
HIST3H2A	turquoise
AASDHPPT	turquoise
STK32C	turquoise
PRIM1	turquoise
WDR76	turquoise
STK39	turquoise
HGFAC	turquoise
FIGNL1	turquoise
WEE1	turquoise
BAI2	turquoise
FAM133A	turquoise
RAB3A	turquoise
TPD52	turquoise
SOX4	turquoise
ZNF649	turquoise
EZH2	turquoise
TMEM35	turquoise
SYCE1	turquoise
INA	turquoise
TNFRSF19	turquoise
MNS1	turquoise
HSD17B11	turquoise
JMJD6	turquoise
HIST1H4A	turquoise
KCNAB3	turquoise
ACAT2	turquoise
HPDL	turquoise
MAP1B	turquoise
MCM7	turquoise
LRRC23	turquoise
KPNA2	turquoise
SCLY	turquoise
MAP9	turquoise
AADAT	turquoise
HSPH1	turquoise
PABPC5	turquoise
PGRMC1	turquoise
MAPK8	turquoise
ZNF483	turquoise
RND2	turquoise
BAZ1A	turquoise
RSPRY1	turquoise
CDH2	turquoise
TSPAN7	turquoise
MTHFD2	turquoise
APOOL	turquoise
SLC29A4	turquoise
ZNF439	turquoise
RASSF7	turquoise
TUBA1A	turquoise
RASL10B	turquoise
PCDHB12	turquoise
PNMA2	turquoise
HIST1H2AB	turquoise
TLE4	turquoise
IQCD	turquoise
PCSK4	turquoise
SAAL1	turquoise
DYDC2	turquoise
PPM1D	turquoise
MCM5	turquoise
HOXD8	turquoise
STOX1	turquoise
RGMB	turquoise
GPC2	turquoise
KIAA1324L	turquoise
SETBP1	turquoise
MXD3	turquoise
HES6	turquoise
C4orf6	turquoise
KCNK3	turquoise
C5orf34	turquoise
PODXL2	turquoise
RIC3	turquoise
C21orf119	turquoise
CLTCL1	turquoise
NAP1L3	turquoise
SATB1	turquoise
STIP1	turquoise
PLXNB1	turquoise
SLC2A1	turquoise
EEF1A2	turquoise
CCDC89	turquoise
CBX1	turquoise
KLHL17	turquoise
FAM134B	turquoise
PAICS	turquoise
SORD	turquoise
CLPB	turquoise
CDK5	turquoise
GDPD3	turquoise
TUBA1C	turquoise
TSPAN6	turquoise
PTS	turquoise
TIGD3	turquoise
ADORA2A	turquoise
ZNF556	turquoise
CAPRIN1	turquoise
CABP1	turquoise
GPX7	turquoise
MEIS3	turquoise
UBE2D4	turquoise
ZNF124	turquoise
LDLRAD3	turquoise
DNASE1L2	turquoise
KLHL23	turquoise
SCN9A	turquoise
MASTL	turquoise
BSN	turquoise
ABHD12	turquoise
CHTF18	turquoise
STK31	turquoise
CXXC4	turquoise
C5	turquoise
FCHO1	turquoise
GRK5	turquoise
VASH2	turquoise
RMND1	turquoise
RHOU	turquoise
KRTCAP3	turquoise
PLS1	turquoise
TRIM2	turquoise
SLC25A10	turquoise
LAGE3	turquoise
HMGCR	turquoise
TRIM36	turquoise
SDF2L1	turquoise
DISP2	turquoise
INPP5F	turquoise
NCAM1	turquoise
PSRC1	turquoise
PRR11	turquoise
FLJ37201	turquoise
HYLS1	turquoise
TCF15	turquoise
GPR162	turquoise
CLMN	turquoise
B3GNT4	turquoise
RTN4	turquoise
KIF26B	turquoise
NDRG4	turquoise
ZNF420	turquoise
RAI1	turquoise
GATA3	turquoise
DNAJA4	turquoise
SLC7A3	turquoise
HIST1H2AJ	turquoise
STXBP4	turquoise
NT5M	turquoise
SAP30	turquoise
PKIA	turquoise
MID1IP1	turquoise
TMEM169	turquoise
CABYR	turquoise
ZNF232	turquoise
TCEAL3	turquoise
TPPP	turquoise
HDAC2	turquoise
TMEM17	turquoise
PGAP1	turquoise
RIMS2	turquoise
MAD2L2	turquoise
CBX4	turquoise
SESN3	turquoise
GSTM3	turquoise
GDPD1	turquoise
METTL9	turquoise
FSCN1	turquoise
MFSD3	turquoise
AFAP1	turquoise
KIAA1524	turquoise
NEO1	turquoise
MAMDC4	turquoise
SARM1	turquoise
OSBPL6	turquoise
TMEM45A	turquoise
IMPDH2	turquoise
TIA1	turquoise
TMTC4	turquoise
SNAP25	turquoise
C17orf58	turquoise
CCDC11	turquoise
SERTAD4	turquoise
ARG2	turquoise
SLC16A2	turquoise
GDAP1L1	turquoise
SF3B3	turquoise
NDE1	turquoise
C5orf30	turquoise
REEP1	turquoise
MXD1	turquoise
PIK3R3	turquoise
EFNA3	turquoise
AP1S1	turquoise
ZNF334	turquoise
SOBP	turquoise
IDI1	turquoise
REM2	turquoise
SH3YL1	turquoise
STX2	turquoise
ZNF195	turquoise
MAPRE3	turquoise
CACNG4	turquoise
SLC36A4	turquoise
PCBP4	turquoise
RAB15	turquoise
AGPAT4	turquoise
EIF4EBP1	turquoise
TEX2	turquoise
THOC5	turquoise
ZNF273	turquoise
TSPAN13	turquoise
ZFP2	turquoise
SGIP1	turquoise
ATXN1	turquoise
DUSP19	turquoise
C19orf57	turquoise
CDCA4	turquoise
RPS6KA5	turquoise
PTBP2	turquoise
CCDC34	turquoise
ANP32E	turquoise
CACNA2D1	turquoise
ATP6V0E2	turquoise
LRBA	turquoise
JAZF1	turquoise
APBA2	turquoise
CITED1	turquoise
SNX12	turquoise
TTC12	turquoise
NCAPD3	turquoise
PLAGL2	turquoise
NBEA	turquoise
TMEM136	turquoise
CCDC82	turquoise
BCOR	turquoise
ZDHHC21	turquoise
PLCB3	turquoise
HIST3H3	turquoise
CRMP1	turquoise
C11orf80	turquoise
KLHDC8B	turquoise
DPP3	turquoise
CDC42EP4	turquoise
KHK	turquoise
HIST1H2AK	turquoise
DCLRE1B	turquoise
EBP	turquoise
PHIP	turquoise
MYH10	turquoise
PRKAR2B	turquoise
SEC63	turquoise
CA11	turquoise
NRG1	turquoise
YWHAH	turquoise
CCDC122	turquoise
ZNF84	turquoise
BZW2	turquoise
PRKACB	turquoise
GALK1	turquoise
HRAS	turquoise
SLC7A9	turquoise
SLC25A22	turquoise
LIG4	turquoise
DPYSL3	turquoise
DGAT2	turquoise
AMN1	turquoise
KDELC1	turquoise
DENND1B	turquoise
NARS2	turquoise
NRM	turquoise
DHX40	turquoise
PBX3	turquoise
RIT1	turquoise
WDHD1	turquoise
POLR2L	turquoise
SUV420H1	turquoise
LIG1	turquoise
FZD3	turquoise
CCT5	turquoise
RAB33A	turquoise
PHF19	turquoise
GSTA4	turquoise
NPR2	turquoise
HP1BP3	turquoise
CDKN2D	turquoise
ZNF711	turquoise
LCOR	turquoise
EPB41L5	turquoise
WNK3	turquoise
FXYD6	turquoise
SLC16A14	turquoise
ADAM11	turquoise
RRAS2	turquoise
JPH3	turquoise
BNIP3	turquoise
RAD51C	turquoise
NRAS	turquoise
N4BP2	turquoise
ZDHHC12	turquoise
REV3L	turquoise
PLCL1	turquoise
HIST1H2BJ	turquoise
GLS	turquoise
KBTBD8	turquoise
MAGI1	turquoise
ANKRD46	turquoise
CRYZL1	turquoise
CACNG2	turquoise
TTC25	turquoise
PDSS1	turquoise
SLC1A4	turquoise
HAND2	turquoise
CIB2	turquoise
CDK5RAP3	turquoise
TPM1	turquoise
ANKRD12	turquoise
EID3	turquoise
CD24	turquoise
FARP1	turquoise
TAGLN3	turquoise
GDAP1	turquoise
GPR125	turquoise
NEDD4L	turquoise
NIPSNAP3A	turquoise
PCMT1	turquoise
C4orf33	turquoise
FASN	turquoise
GABRB3	turquoise
KIAA1841	turquoise
ZNF239	turquoise
REC8	turquoise
JARID2	turquoise
PAFAH1B3	turquoise
PLEKHA8	turquoise
C1QTNF3	turquoise
NAT14	turquoise
ITGB1BP2	turquoise
QDPR	turquoise
TTC28	turquoise
APOBEC2	turquoise
C8orf48	turquoise
CLGN	turquoise
ARL4D	turquoise
WRB	turquoise
SEZ6L2	turquoise
MYLK2	turquoise
RPA3	turquoise
ZNF800	turquoise
KCTD6	turquoise
C14orf132	turquoise
SLCO1A2	turquoise
RIMBP2	turquoise
ZNF540	turquoise
MXI1	turquoise
CENPQ	turquoise
ARL6	turquoise
PTGER3	turquoise
FSTL4	turquoise
AMOT	turquoise
CDC25B	turquoise
LRRC34	turquoise
BEX1	turquoise
SERAC1	turquoise
PDXP	turquoise
SH3RF1	turquoise
ENO2	turquoise
ZNF25	turquoise
RAPGEFL1	turquoise
MMP15	turquoise
KLHL7	turquoise
KCNQ5	turquoise
RIMS3	turquoise
CYGB	turquoise
CBX5	turquoise
RNASEH2C	turquoise
TTC9B	turquoise
YARS	turquoise
ARHGEF10L	turquoise
CDKN2B	turquoise
H2AFY2	turquoise
HIRIP3	turquoise
GABBR2	turquoise
FBXL2	turquoise
BICD1	turquoise
TTLL7	turquoise
LARGE	turquoise
KIFAP3	turquoise
HCG27	turquoise
NCKAP1	turquoise
CCNB1IP1	turquoise
DCXR	turquoise
LHFPL4	turquoise
IGSF3	turquoise
TRIO	turquoise
LRRC8B	turquoise
ZNF397	turquoise
IRAK1	turquoise
DNAJB5	turquoise
PPAT	turquoise
GPR27	turquoise
ANKFY1	turquoise
AHCY	turquoise
CTXN1	turquoise
TAF10	turquoise
ARNTL2	turquoise
IGF1R	turquoise
NOVA2	turquoise
C10orf35	turquoise
USP1	turquoise
BTG3	turquoise
ZNF678	turquoise
FANCB	turquoise
LYSMD1	turquoise
CNGB1	turquoise
LRP2BP	turquoise
DEAF1	turquoise
INTS2	turquoise
VPS26B	turquoise
RUFY2	turquoise
CLASP2	turquoise
SBF2	turquoise
MPP2	turquoise
ITGB3BP	turquoise
RAB6B	turquoise
BVES	turquoise
CCDC15	turquoise
LSM4	turquoise
FAM110A	turquoise
C14orf80	turquoise
TSPAN5	turquoise
RNF175	turquoise
KIF3C	turquoise
TMEM99	turquoise
SLC25A4	turquoise
RINT1	turquoise
ARNT2	turquoise
TUBB	turquoise
LYPLA2	turquoise
PDIK1L	turquoise
ZNF610	turquoise
CENPP	turquoise
LRRC39	turquoise
REEP4	turquoise
FBXL21	turquoise
SLC1A5	turquoise
KCNJ9	turquoise
C17orf53	turquoise
DYNLL2	turquoise
RPP25	turquoise
TEAD1	turquoise
GPRASP1	turquoise
PARD6G	turquoise
SMC3	turquoise
SSX2IP	turquoise
RBBP8	turquoise
PHACTR3	turquoise
ZMIZ1	turquoise
SCG3	turquoise
PCM1	turquoise
ZNF92	turquoise
WDR54	turquoise
ZNF660	turquoise
RRP12	turquoise
DND1	turquoise
MPP3	turquoise
SNAP91	turquoise
LCORL	turquoise
USPL1	turquoise
CCDC23	turquoise
SIVA1	turquoise
STRBP	turquoise
EXTL2	turquoise
C14orf39	turquoise
EFHC1	turquoise
SPTBN2	turquoise
ABHD14A	turquoise
ITGB1BP1	turquoise
NET1	turquoise
KIAA0232	turquoise
FAM19A2	turquoise
ADAM22	turquoise
ZNF14	turquoise
STYXL1	turquoise
SPTBN4	turquoise
RSPO1	turquoise
DONSON	turquoise
IFRD1	turquoise
PSMC3	turquoise
CYCS	turquoise
ING2	turquoise
GNB2	turquoise
MORN3	turquoise
ZNF781	turquoise
PTRH2	turquoise
RTN3	turquoise
SMAD5	turquoise
ZDHHC13	turquoise
SYNE2	turquoise
KIAA1279	turquoise
MED12L	turquoise
HSPD1	turquoise
TCP11L1	turquoise
NSDHL	turquoise
PRSS27	turquoise
WDR82	turquoise
LIMD2	turquoise
GKAP1	turquoise
CHORDC1	turquoise
HIF1A	turquoise
UNG	turquoise
DUSP16	turquoise
STX6	turquoise
RNF11	turquoise
PRKCE	turquoise
SCAMP1	turquoise
IL17RD	turquoise
PELI3	turquoise
RFK	turquoise
ZNF692	turquoise
C9orf72	turquoise
TCF4	turquoise
PTP4A1	turquoise
TTYH3	turquoise
TEX15	turquoise
ZNF234	turquoise
DIP2C	turquoise
ELAVL4	turquoise
THAP10	turquoise
C19orf48	turquoise
SLC19A2	turquoise
TAF1B	turquoise
TTC30B	turquoise
GNB3	turquoise
FBXO16	turquoise
CCDC112	turquoise
SREBF2	turquoise
KIAA1715	turquoise
HOOK1	turquoise
ZNF426	turquoise
NKIRAS1	turquoise
DNM1L	turquoise
B4GALNT1	turquoise
RNASEH2B	turquoise
PIN4	turquoise
NEK1	turquoise
SERGEF	turquoise
DPYSL4	turquoise
SEC11C	turquoise
FAM122B	turquoise
C20orf27	turquoise
KLF7	turquoise
ABHD3	turquoise
NUDT15	turquoise
PARD6A	turquoise
UNC5CL	turquoise
SASS6	turquoise
RBM7	turquoise
RALGPS1	turquoise
MED30	turquoise
DTNA	turquoise
MBOAT2	turquoise
CDK8	turquoise
SEMA4F	turquoise
TMEM107	turquoise
DPYSL2	turquoise
ARL6IP6	turquoise
ZDHHC15	turquoise
MYT1	turquoise
TH	turquoise
RAC3	turquoise
ACTR3B	turquoise
CLIP2	turquoise
FOXN2	turquoise
ACTL6B	turquoise
CPSF3	turquoise
NUDT12	turquoise
AS3MT	turquoise
CHAC2	turquoise
RAB33B	turquoise
DOK4	turquoise
TMEM65	turquoise
FGF19	turquoise
CETN2	turquoise
ZNF180	turquoise
GYG2	turquoise
PXMP2	turquoise
CDKAL1	turquoise
DLG1	turquoise
TRIM23	turquoise
KBTBD4	turquoise
CCDC77	turquoise
OGG1	turquoise
ZNF785	turquoise
ST8SIA3	turquoise
TBC1D19	turquoise
SNRPB	turquoise
CEP57	turquoise
CLP1	turquoise
USP5	turquoise
TCEAL7	turquoise
RGAG1	turquoise
IQCH	turquoise
MYSM1	turquoise
ACTN3	turquoise
THAP2	turquoise
BRSK2	turquoise
GRK4	turquoise
B3GALNT1	turquoise
SESTD1	turquoise
VPS37D	turquoise
FGFBP3	turquoise
BBS12	turquoise
FXR2	turquoise
PRKX	turquoise
MSI2	turquoise
ZBED5	turquoise
DOC2A	turquoise
TUBG2	turquoise
PDS5A	turquoise
FTSJ3	turquoise
RALGDS	turquoise
TSC1	turquoise
ARHGAP28	turquoise
SIRT4	turquoise
INTS8	turquoise
SLC4A7	turquoise
RPS6KA6	turquoise
ADCK2	turquoise
PPP1CA	turquoise
ZNF416	turquoise
ENAH	turquoise
QRICH2	turquoise
PFN2	turquoise
SENP7	turquoise
DNMT3A	turquoise
KIF1A	turquoise
ANKRD13B	turquoise
CCDC14	turquoise
APLP1	turquoise
DZIP1	turquoise
ASCC3	turquoise
SCML1	turquoise
QRSL1	turquoise
DARS2	turquoise
MMP16	turquoise
MLLT11	turquoise
NPAT	turquoise
MAP2K2	turquoise
TDRD3	turquoise
DHRS13	turquoise
NMNAT2	turquoise
UBE2M	turquoise
ENO1	turquoise
MAGOH	turquoise
PCBD1	turquoise
ZNF500	turquoise
FAM63B	turquoise
GRHL1	turquoise
HINT2	turquoise
SGCB	turquoise
AHSA1	turquoise
E2F5	turquoise
APEX1	turquoise
C17orf75	turquoise
PPAPDC2	turquoise
SLC5A3	turquoise
PJA2	turquoise
CPSF1	turquoise
YPEL1	turquoise
B3GAT3	turquoise
PRDX5	turquoise
KBTBD3	turquoise
MBD5	turquoise
ZFP90	turquoise
NDUFA3	turquoise
BACE1	turquoise
DMXL2	turquoise
RAB2B	turquoise
CCDC137	turquoise
CCDC104	turquoise
HSD17B8	turquoise
CCDC17	turquoise
CAMK1	turquoise
PSMD2	turquoise
ZBED4	turquoise
ELMO2	turquoise
APBB1	turquoise
ARL5B	turquoise
AK3	turquoise
ATP6V1B2	turquoise
CCDC90B	turquoise
CAMSAP1	turquoise
TUBE1	turquoise
TRO	turquoise
ABHD5	turquoise
GPRIN1	turquoise
SEMA4G	turquoise
SRPK2	turquoise
DOPEY1	turquoise
TMEM182	turquoise
AKAP11	turquoise
PRKAB2	turquoise
FNBP1L	turquoise
THNSL1	turquoise
CCR10	turquoise
LDOC1L	turquoise
MTMR9	turquoise
TRA2A	turquoise
ACAA2	turquoise
ADSL	turquoise
PLXNA1	turquoise
GDF9	turquoise
NR2F6	turquoise
ZNF549	turquoise
HLCS	turquoise
WDR62	turquoise
MMD	turquoise
CCNE1	turquoise
SDHC	turquoise
PDP2	turquoise
LAPTM4B	turquoise
NASP	turquoise
MAGEC2	turquoise
PIGS	turquoise
TMEM104	turquoise
NUDT11	turquoise
C3orf14	turquoise
C11orf74	turquoise
RFXAP	turquoise
CLCN4	turquoise
SSSCA1	turquoise
USP49	turquoise
GNRH1	turquoise
RPP40	turquoise
CUEDC1	turquoise
KLHL24	turquoise
FOXRED1	turquoise
RBM15	turquoise
ANK2	turquoise
KIF3A	turquoise
RAD18	turquoise
CKB	turquoise
CPEB4	turquoise
C7orf49	turquoise
SMARCC1	turquoise
EIF3M	turquoise
SH3GLB2	turquoise
WWC1	turquoise
RRS1	turquoise
CDIPT	turquoise
MRPS23	turquoise
MREG	turquoise
PYGB	turquoise
RAB39B	turquoise
BCORL1	turquoise
HECTD2	turquoise
IFT172	turquoise
MCCC1	turquoise
PASK	turquoise
GPATCH8	turquoise
GOT2	turquoise
HEXIM2	turquoise
SETD6	turquoise
SLC4A2	turquoise
PRMT6	turquoise
FSD1L	turquoise
PCGF1	turquoise
FAM92A1	turquoise
ORAOV1	turquoise
RAB8A	turquoise
SAMD1	turquoise
ZRANB1	turquoise
PEMT	turquoise
RNF138	turquoise
TSNAXIP1	turquoise
CREB3L4	turquoise
KPNA5	turquoise
CENPI	turquoise
SLC29A1	turquoise
ANKZF1	turquoise
GLYATL2	turquoise
FAAH	turquoise
FIBP	turquoise
C2orf43	turquoise
RANGAP1	turquoise
CAMK2G	turquoise
GNL3L	turquoise
MTMR2	turquoise
ARHGDIA	turquoise
IFT74	turquoise
LRRC61	turquoise
HSP90AB1	turquoise
CERK	turquoise
C7orf31	turquoise
SACS	turquoise
FGFR2	turquoise
CUL2	turquoise
MRPL21	turquoise
TSPYL4	turquoise
FBXO3	turquoise
MARCKSL1	turquoise
MDM1	turquoise
CLCN5	turquoise
ANK1	turquoise
WNK2	turquoise
CYB5B	turquoise
ZNF658	turquoise
RFC2	turquoise
OSGEPL1	turquoise
ZSCAN16	turquoise
C21orf58	turquoise
GABPB2	turquoise
HSPA1L	turquoise
ZNF473	turquoise
CEP68	turquoise
TPCN2	turquoise
FBXO11	turquoise
DPF2	turquoise
USP38	turquoise
KPTN	turquoise
SUPT3H	turquoise
ZBTB3	turquoise
ZNF654	turquoise
ISCA2	turquoise
ZAR1	turquoise
CCT2	turquoise
FECH	turquoise
LSM11	turquoise
ZFAND2A	turquoise
NRL	turquoise
MTHFD1	turquoise
HIST1H2AG	turquoise
JAKMIP2	turquoise
FBXL20	turquoise
MAPK10	turquoise
NDFIP1	turquoise
MAGEB2	turquoise
C1orf74	turquoise
ZNF467	turquoise
ZNF287	turquoise
GLO1	turquoise
C14orf142	turquoise
MANEA	turquoise
TLX2	turquoise
SMARCA4	turquoise
NEDD8	turquoise
RAB23	turquoise
C11orf48	turquoise
FAM76B	turquoise
TKTL2	turquoise
MANEAL	turquoise
TMEM180	turquoise
PRKCA	turquoise
PURG	turquoise
GPATCH4	turquoise
HSDL1	turquoise
C17orf80	turquoise
LRRC49	turquoise
LYG1	turquoise
CCNG1	turquoise
SLC25A39	turquoise
APOM	turquoise
KIAA1549	turquoise
MCTS1	turquoise
EML1	turquoise
LRP8	turquoise
ASPHD1	turquoise
RAD54L2	turquoise
RAP1GDS1	turquoise
UBQLN4	turquoise
IMPDH1	turquoise
FBXW7	turquoise
EI24	turquoise
VBP1	turquoise
EID2B	turquoise
HACE1	turquoise
AVEN	turquoise
MED19	turquoise
PLCB4	turquoise
DYNC2LI1	turquoise
MINPP1	turquoise
PGK1	turquoise
POLR3K	turquoise
ELOVL6	turquoise
ZNF266	turquoise
HLTF	turquoise
WDSUB1	turquoise
SRD5A1	turquoise
RUNX1T1	turquoise
TRIM28	turquoise
RDH5	turquoise
NGDN	turquoise
SMC1A	turquoise
SUV39H1	turquoise
PCDHB13	turquoise
TUSC3	turquoise
CAB39	turquoise
POLB	turquoise
MRPL17	turquoise
UBE2V2	turquoise
C2orf44	turquoise
PHTF2	turquoise
ZC3H6	turquoise
DCAKD	turquoise
PRMT5	turquoise
HDGF	turquoise
ALDH7A1	turquoise
MTHFD2L	turquoise
CAMKK2	turquoise
NLN	turquoise
PPA1	turquoise
MMAB	turquoise
PHOX2B	turquoise
HSP90AA1	turquoise
HN1	turquoise
SYT11	turquoise
ZNF623	turquoise
PPME1	turquoise
CRK	turquoise
C11orf57	turquoise
TMCO3	turquoise
PGD	turquoise
RFX3	turquoise
ZNF443	turquoise
BRMS1	turquoise
RTN2	turquoise
HMGN2	turquoise
SLC25A1	turquoise
NLE1	turquoise
IFT140	turquoise
BRD3	turquoise
BDNF	turquoise
ZSWIM3	turquoise
TMED4	turquoise
PSTK	turquoise
SPTAN1	turquoise
KATNAL1	turquoise
MRPS7	turquoise
SSRP1	turquoise
ATP6V1E1	turquoise
PCCB	turquoise
COX7A2L	turquoise
AUH	turquoise
RAB2A	turquoise
WDR19	turquoise
CCNJ	turquoise
DCUN1D5	turquoise
DPH3	turquoise
LIAS	turquoise
BANF1	turquoise
ARRDC3	turquoise
GNG2	turquoise
PDZD8	turquoise
ZFYVE27	turquoise
CEBPG	turquoise
ZNF415	turquoise
EDARADD	turquoise
LRCH2	turquoise
GDF11	turquoise
ZNF789	turquoise
MAPK3	turquoise
ZNF160	turquoise
PIAS4	turquoise
CBR4	turquoise
GAB2	turquoise
CDC42EP3	turquoise
TBC1D16	turquoise
HMBS	turquoise
RAB9B	turquoise
ARMC2	turquoise
ATF1	turquoise
GNAO1	turquoise
ZMYND19	turquoise
TSPYL5	turquoise
RAN	turquoise
TSEN54	turquoise
PGBD1	turquoise
RPUSD4	turquoise
SKP2	turquoise
SPAG9	turquoise
DSCR9	turquoise
CWF19L1	turquoise
FANCM	turquoise
ATP5L	turquoise
ZNF256	turquoise
WDR47	turquoise
ZBTB37	turquoise
CEP70	turquoise
ASPHD2	turquoise
PPP2R3A	turquoise
FUBP1	turquoise
SFXN4	turquoise
IFT81	turquoise
TDP1	turquoise
ZFP28	turquoise
KIF5B	turquoise
EXOSC5	turquoise
PHTF1	turquoise
MTA2	turquoise
MAGED2	turquoise
BUB3	turquoise
DYNC1I2	turquoise
DCLK2	turquoise
FNDC3A	turquoise
SCN8A	turquoise
SLC37A3	turquoise
PSMC5	turquoise
KRIT1	turquoise
RPS27L	turquoise
SOX12	turquoise
UPF3A	turquoise
GCK	turquoise
DOCK7	turquoise
SFPQ	turquoise
CDK2	turquoise
XRN2	turquoise
TNPO3	turquoise
CALML4	turquoise
SEPHS2	turquoise
GINS3	turquoise
SLC39A6	turquoise
SUPT16H	turquoise
STXBP5	turquoise
RICTOR	turquoise
DAPK1	turquoise
ATP6V1E2	turquoise
CYFIP2	turquoise
SYAP1	turquoise
C14orf79	turquoise
PPAPDC3	turquoise
PREPL	turquoise
ZNF345	turquoise
VTA1	turquoise
TIGD5	turquoise
ZNF606	turquoise
SLC41A2	turquoise
FANCG	turquoise
COG1	turquoise
DYNLT1	turquoise
PNN	turquoise
TCERG1	turquoise
DPY19L3	turquoise
ZBTB5	turquoise
RFWD3	turquoise
CBLL1	turquoise
TTC3	turquoise
MAEL	turquoise
DUSP9	turquoise
PDK1	turquoise
ZNF669	turquoise
FAM118B	turquoise
ZNF202	turquoise
ZYG11A	turquoise
KBTBD7	turquoise
BRI3BP	turquoise
MYEF2	turquoise
FAM126B	turquoise
TSPAN18	turquoise
C19orf40	turquoise
SMAD4	turquoise
SRP68	turquoise
ATP5I	turquoise
MFAP3	turquoise
VPS37C	turquoise
MORF4L2	turquoise
VEGFB	turquoise
MAP4K3	turquoise
TUBGCP3	turquoise
KLHL25	turquoise
L1CAM	turquoise
DICER1	turquoise
KCND1	turquoise
TTLL1	turquoise
SNAPC1	turquoise
DCTN5	turquoise
HSD17B10	turquoise
APIP	turquoise
ZNF441	turquoise
BMI1	turquoise
CASZ1	turquoise
TAF4	turquoise
ADAL	turquoise
RSRC1	turquoise
FAM135A	turquoise
CLK1	turquoise
MLLT4	turquoise
ADCK1	turquoise
NUDT10	turquoise
KPNB1	turquoise
POLR3D	turquoise
JRKL	turquoise
PBRM1	turquoise
G3BP1	turquoise
KIAA1586	turquoise
ATP2B1	turquoise
ACIN1	turquoise
C7orf25	turquoise
C9orf64	turquoise
SPIN3	turquoise
BRWD1	turquoise
C6orf165	turquoise
LRP12	turquoise
HIST1H3G	turquoise
PEX11A	turquoise
EBPL	turquoise
HCN3	turquoise
TNPO1	turquoise
EIF1B	turquoise
ITGAE	turquoise
CCDC121	turquoise
RASA1	turquoise
SLC2A13	turquoise
CCDC86	turquoise
SHKBP1	turquoise
COX8A	turquoise
CHCHD3	turquoise
RRP9	turquoise
MAGI2	turquoise
RBBP4	turquoise
CCBL1	turquoise
CDON	turquoise
BCKDHB	turquoise
CNTD2	turquoise
NFKBIL1	turquoise
DNMT1	turquoise
FSD1	turquoise
MYO9A	turquoise
BRF2	turquoise
SYT14	turquoise
FANCL	turquoise
EXOSC3	turquoise
ISOC1	turquoise
DMTF1	turquoise
DUS4L	turquoise
ARMC8	turquoise
ATF2	turquoise
NDNL2	turquoise
ZNF30	turquoise
GSTZ1	turquoise
TDRKH	turquoise
PEX16	turquoise
ZCRB1	turquoise
SENP6	turquoise
PKN1	turquoise
TMLHE	turquoise
FBXL4	turquoise
TECTA	turquoise
FRAT1	turquoise
GBAS	turquoise
WDR5B	turquoise
THYN1	turquoise
C9orf16	turquoise
CREBZF	turquoise
NME4	turquoise
CNOT6	turquoise
POU6F2	turquoise
CRY1	turquoise
MAPK6	turquoise
MPDU1	turquoise
ECE2	turquoise
TMEM38B	turquoise
GPR161	turquoise
B4GALT6	turquoise
DNAL1	turquoise
CRADD	turquoise
WASF1	turquoise
ACSL3	turquoise
ING4	turquoise
TIMM10	turquoise
FAIM	turquoise
ZNF684	turquoise
BRMS1L	turquoise
PRDX4	turquoise
AKT1	turquoise
TMTC3	turquoise
MRPL48	turquoise
STOML2	turquoise
SCOC	turquoise
FRS3	turquoise
TMEM106C	turquoise
NFXL1	turquoise
ZNF77	turquoise
HSPA5	turquoise
HSF2	turquoise
C16orf80	turquoise
EIF2S2	turquoise
CACNB3	turquoise
GTF2H5	turquoise
IL20RB	turquoise
TAS2R14	turquoise
LSM5	turquoise
CLDN10	turquoise
MIF4GD	turquoise
MDM4	turquoise
FAM127A	turquoise
GORASP2	turquoise
GUF1	turquoise
POLR2J	turquoise
PUS3	turquoise
CCDC138	turquoise
ZNF165	turquoise
PTPRF	turquoise
CATSPER3	turquoise
ING3	turquoise
CFL1	turquoise
NSMCE4A	turquoise
POP5	turquoise
CDR2L	turquoise
NGFRAP1	turquoise
NUP88	turquoise
APPL2	turquoise
DCHS1	turquoise
TMEM141	turquoise
KCNRG	turquoise
KIAA1598	turquoise
ITGA2B	turquoise
SMCHD1	turquoise
NCOA2	turquoise
C11orf54	turquoise
CASD1	turquoise
CCDC93	turquoise
RAB30	turquoise
SMARCB1	turquoise
NUP107	turquoise
COMMD2	turquoise
ATP6V0A2	turquoise
ZNF215	turquoise
NFAT5	turquoise
GEMIN6	turquoise
GTPBP3	turquoise
TRAFD1	turquoise
ANKRD49	turquoise
ZNF566	turquoise
GNAQ	turquoise
NANS	turquoise
FAM104B	turquoise
REEP2	turquoise
PSD	turquoise
VEZF1	turquoise
ICT1	turquoise
IER3IP1	turquoise
CUTC	turquoise
ZNF502	turquoise
DET1	turquoise
FOSB	blue
OGN	blue
SFRP4	blue
THBS4	blue
FOS	blue
DCN	blue
PLP1	blue
CYB5R2	blue
CYR61	blue
NAP1L2	blue
[truncated: 3,794 more rows]

## Sheet: Canonical pathway-turquoise
¬© 2000-2020 QIAGEN. All rights reserved.
Ingenuity Canonical Pathways	-log(p-value)	Ratio	z-score	Molecules
Role of BRCA1 in DNA Damage Response	15.3	0.425	1.279	ACTL6B,ATF1,BARD1,BLM,BRCA2,BRIP1,CHEK1,CHEK2,DPF1,E2F1,E2F2,E2F3,E2F5,E2F7,E2F8,FAAP24,FANCA,FANCB,FANCD2,FANCG,FANCL,FANCM,HLTF,PBRM1,PLK1,RAD51,RBBP8,RFC2,RFC3,RFC5,SMARCA4,SMARCB1,SMARCC1,TOPBP1
Kinetochore Metaphase Signaling Pathway	14.1	0.366	4.017	BIRC5,BUB1,BUB3,CCNB1,CDC20,CDCA8,CENPA,CENPE,CENPH,CENPK,CENPN,CENPO,CENPP,CENPQ,DSN1,ESPL1,INCENP,KIF2C,KNL1,KNTC1,MAD2L1,MAD2L2,MASTL,MXD3,NDC80,NEK2,NUF2,PLK1,PPP1CA,PTTG1,REC8,SMC1A,SMC3,SPC25,TTK,ZWILCH,ZWINT
Hereditary Breast Cancer Signaling	11.2	0.286	NaN	ACTL6B,AKT1,BARD1,BLM,BRCA2,CCNB1,CCND1,CDC25C,CDK6,CHEK1,CHEK2,DDB2,DPF1,E2F1,FAAP24,FANCA,FANCB,FANCD2,FANCG,FANCL,FANCM,GADD45G,HDAC2,HLTF,HRAS,NRAS,PBRM1,PIK3R1,PIK3R3,POLR2J,POLR2L,RAD51,RFC2,RFC3,RFC5,RRAS2,SMARCA4,SMARCB1,SMARCC1,WEE1
ATM Signaling	10.2	0.32	0	ATF1,ATF2,BLM,CBX1,CBX5,CCNB1,CCNB2,CDC25A,CDC25C,CDK2,CHEK1,CHEK2,CREB3L4,FANCD2,GADD45G,HP1BP3,MAPK10,MAPK8,MDM4,PPM1D,PPP2R3A,RAD51,RBBP8,SMC1A,SMC2,SMC3,SUV39H1,TDP1,TOPBP1,TRIM28,ZNF420
Cyclins and Cell Cycle Regulation	8.7	0.321	2.294	CCNA1,CCNA2,CCNB1,CCNB2,CCND1,CCNE1,CCNE2,CDC25A,CDK2,CDK6,CDKN2A,CDKN2B,CDKN2C,CDKN2D,E2F1,E2F2,E2F3,E2F5,E2F7,E2F8,HDAC2,MYT1,PPP2R3A,SKP2,SUV39H1,WEE1
Mitotic Roles of Polo-Like Kinase	8.55	0.348	1.604	CCNB1,CCNB2,CDC20,CDC25A,CDC25B,CDC25C,CDC7,CHEK2,ESPL1,FBXO5,HSP90AA1,HSP90AB1,KIF11,KIF23,PKMYT1,PLK1,PLK4,PPP2R3A,PRC1,PTTG1,SMC1A,SMC3,WEE1
Cell Cycle Control of Chromosomal Replication	8.53	0.375	4.583	CDC6,CDC7,CDK2,CDK5,CDK6,CDK8,CDT1,CHEK2,DBF4,LIG1,MCM2,MCM4,MCM5,MCM6,MCM7,MCM8,PCNA,POLA2,POLD1,PRIM1,RPA3
Estrogen-mediated S-phase Entry	8.35	0.538	3.742	CCNA1,CCNA2,CCND1,CCNE1,CCNE2,CDC25A,CDK2,E2F1,E2F2,E2F3,E2F5,E2F7,E2F8,SKP2
Molecular Mechanisms of Cancer	8.05	0.176	NaN	ADCY1,ADCY8,AKT1,AURKA,BCL2,BMP7,BMPR1B,CAMK2G,CASP3,CCND1,CCNE1,CCNE2,CDC25A,CDC25B,CDC25C,CDK2,CDK5,CDK6,CDK8,CDKN2A,CDKN2B,CDKN2C,CDKN2D,CHEK1,CHEK2,CRK,CYCS,E2F1,E2F2,E2F3,E2F5,E2F7,E2F8,FANCD2,FZD3,FZD5,GAB2,GNAI1,GNAO1,GNAQ,GNAS,HIF1A,HRAS,MAP2K2,MAPK10,MAPK3,MAPK8,NRAS,PAK2,PAK5,PIK3R1,PIK3R3,PLCB3,PLCB4,PRKACB,PRKAR2B,PRKCA,PRKCE,RAC3,RALGDS,RASA1,RHOU,RND2,RRAS2,SMAD4,SMAD5,SUV39H1,TCF4,…
CREB Signaling in Neurons	7.74	0.213	0	ADCY1,ADCY8,AKT1,ATF2,CACNA2D1,CACNA2D3,CACNB3,CACNB4,CACNG1,CACNG2,CACNG4,CAMK2G,CAMK4,CREB3L4,GNAI1,GNAO1,GNAQ,GNAS,GNB2,GNB3,GNG2,GNG3,GNG4,GRIA2,GRIK1,GRIK2,GRM8,HRAS,MAP2K2,MAPK3,NRAS,PIK3R1,PIK3R3,PLCB3,PLCB4,PLCD4,PLCL1,POLR2J,POLR2L,PRKACB,PRKAR2B,PRKCA,PRKCE,RRAS2
Synaptogenesis Signaling Pathway	7.69	0.186	-1.236	ADCY1,ADCY8,AFDN,AKT1,ATF2,BDNF,CACNA2D1,CACNB3,CACNB4,CACNG1,CAMK2G,CAMK4,CDH2,CDH7,CDK5,CFL1,CLASP2,CNTNAP2,CREB3L4,CRK,EFNA3,EFNB2,EIF4EBP1,EPHA5,EPHB3,FARP1,GRIA2,GRM8,HRAS,LRP8,LRRTM2,MAP1B,MAPK3,NECTIN1,NECTIN3,NRAS,PIK3R1,PIK3R3,PRKACB,PRKAR2B,PRKCE,RAB3A,RRAS2,SHC3,SHF,SNAP25,STXBP4,STXBP5,SYN2,SYN3,SYT1,SYT11,SYT13,SYT14,SYT3,SYT6,VLDLR,WASF1
Cell Cycle: G1/S Checkpoint Regulation	7.66	0.328	-1.091	BMI1,CCND1,CCNE1,CCNE2,CDC25A,CDK2,CDK6,CDKN2A,CDKN2B,CDKN2C,CDKN2D,E2F1,E2F2,E2F3,E2F5,E2F7,E2F8,HDAC2,NRG1,SKP2,SMAD4,SUV39H1
Pyridoxal 5'-phosphate Salvage Pathway	7.08	0.318	1.789	CDK2,CDK5,CDK6,CDK8,DAPK1,GRK4,GRK5,IRAK1,MAP2K2,MAPK3,MAPK6,MAPK8,NEK2,PAK2,PAK5,PKN1,PLK1,PRKCE,PRKX,PSTK,TTK
Endocannabinoid Neuronal Synapse Pathway	6.98	0.242	0.365	ADCY1,ADCY8,CACNA2D1,CACNA2D3,CACNB3,CACNB4,CACNG1,CACNG2,CACNG4,CNR1,DAGLA,FAAH,GNAI1,GNAO1,GNAQ,GNB3,GNG2,GRIA2,KCNJ6,KCNJ9,MAPK10,MAPK3,MAPK6,MAPK8,PLCB3,PLCB4,PLCD4,PLCL1,PRKACB,PRKAR2B,RIMS1
Axonal Guidance Signaling	6.91	0.159	NaN	ADAM11,ADAM22,AKT1,BDNF,BMP7,CDK5,CFL1,CRK,DCC,DPYSL2,ECE2,EFNA3,EFNB2,EPHA5,EPHB3,FZD3,FZD5,GNAI1,GNAO1,GNAQ,GNAS,GNB2,GNB3,GNG2,GNG3,GNG4,HRAS,L1CAM,LRRC4C,MAP2K2,MAPK3,MMP15,MMP16,MYSM1,NFAT5,NRAS,NRP2,NTNG1,NTRK1,PAK2,PAK5,PFN2,PIK3R1,PIK3R3,PLCB3,PLCB4,PLCD4,PLCL1,PLXNA1,PLXNA2,PLXNB1,PLXNC1,PRKACB,PRKAR2B,PRKCA,PRKCE,RAC3,RASA1,ROBO1,RRAS2,RTN4,RTN4R,SEMA3A,SEMA3D,SEMA3E,SEMA4F,SEMA4G,SEMA6…
Pancreatic Adenocarcinoma Signaling	6.38	0.248	0.535	AKT1,BCL2,BIRC5,BRCA2,CCND1,CCNE1,CDK2,CDKN2A,CDKN2B,E2F1,E2F2,E2F3,E2F5,E2F7,E2F8,MAP2K2,MAPK10,MAPK3,MAPK8,PIK3R1,PIK3R3,PLD5,RAD51,RALGDS,SMAD4,SUV39H1,VEGFB
Protein Kinase A Signaling	6.31	0.163	0.674	ADCY1,ADCY8,AKAP11,AKAP6,AKAP9,APEX1,ATF1,ATF2,CAMK2G,CAMK4,CDC25A,CDC25B,CDC25C,CDKN3,CNGB1,CREB3L4,DCC,DUSP16,DUSP26,DUSP9,EYA1,GDPD1,GNAI1,GNAQ,GNAS,GNB2,GNB3,GNG2,GNG3,GNG4,H1-0,H1-1,H1-10,H1-2,H1-3,H1-4,H1-5,H3-4,MAP2K2,MAPK3,MPPED2,MYH10,MYLK2,NFAT5,PDE11A,PLCB3,PLCB4,PLCD4,PLCL1,PPP1CA,PRKACB,PRKAR2B,PRKCA,PRKCE,PTP4A1,PTPN5,PTPRD,PTPRF,PTPRO,PTPRR,PYGB,SMAD4,TCF4,TH,YWHAH
Glioma Signaling	6.29	0.245	0	AKT1,CAMK1,CAMK2G,CAMK4,CCND1,CDK6,CDKN2A,CDKN2B,CDKN2C,CDKN2D,E2F1,E2F2,E2F3,E2F5,E2F7,E2F8,HRAS,IGF1R,MAP2K2,MAPK3,NRAS,PIK3R1,PIK3R3,PRKCA,PRKCE,RRAS2,SUV39H1
Role of CHK Proteins in Cell Cycle Checkpoint Control	6.1	0.316	-1.155	CDC25A,CDC25C,CDK2,CHEK1,CHEK2,CLSPN,E2F1,E2F2,E2F3,E2F5,E2F7,E2F8,PCNA,PLK1,PPP2R3A,RFC2,RFC3,RFC5
Role of NFAT in Cardiac Hypertrophy	5.99	0.192	-0.493	ADCY1,ADCY8,AKT1,CACNA2D1,CACNA2D3,CACNB3,CACNB4,CACNG1,CACNG2,CACNG4,CAMK1,CAMK2G,CAMK4,GNAI1,GNAQ,GNAS,GNB2,GNB3,GNG2,GNG3,GNG4,HDAC2,HRAS,IGF1R,MAP2K2,MAPK10,MAPK3,MAPK8,NRAS,PIK3R1,PIK3R3,PLCB3,PLCB4,PLCD4,PLCL1,PRKACB,PRKAR2B,PRKCA,PRKCE,RRAS2,SLC8A1
Opioid Signaling Pathway	5.87	0.182	1.809	ADCY1,ADCY8,AKT1,ATF2,CACNA2D1,CACNA2D3,CACNB3,CACNB4,CACNG1,CACNG2,CACNG4,CAMK1,CAMK2G,CAMK4,CLTCL1,CREB3L4,GNAI1,GNAO1,GNAS,GNB3,GNG2,GRK3,GRK4,GRK5,HRAS,KCNJ6,KCNJ9,MAP2K2,MAPK3,MAPK6,NRAS,PDK1,PRKACB,PRKAR2B,PRKCA,PRKCE,RAC3,RGS17,RGS4,RGS5,RGS7,RPS6KA5,RPS6KA6,RRAS2,TH
G Beta Gamma Signaling	5.86	0.23	0.962	ADCY1,AKT1,CACNA2D1,CACNA2D3,CACNB3,CACNB4,CACNG1,CACNG2,CACNG4,GNAI1,GNAO1,GNAQ,GNAS,GNB2,GNB3,GNG2,GNG3,GNG4,HRAS,KCNJ6,KCNJ9,MAPK3,NRAS,PRKACB,PRKAR2B,PRKCA,PRKCE,RRAS2
Cell Cycle: G2/M DNA Damage Checkpoint Regulation	5.71	0.327	-1.069	AURKA,CCNB1,CCNB2,CDC25B,CDC25C,CDKN2A,CHEK1,CHEK2,CKS2,MDM4,PKMYT1,PLK1,PPM1D,SKP2,WEE1,YWHAH
Superpathway of Cholesterol Biosynthesis	5.66	0.414	3.317	ACAA2,ACAT2,DHCR24,DHCR7,EBP,FDFT1,HMGCR,HMGCS1,IDI1,NSDHL,SQLE,TM7SF2
P2Y Purigenic Receptor Signaling Pathway	5.5	0.22	0.816	ADCY1,ADCY8,AKT1,ATF2,CREB3L4,GNAI1,GNAQ,GNB2,GNB3,GNG2,GNG3,GNG4,HRAS,ITGA2B,MAP2K2,MAPK3,NRAS,PIK3R1,PIK3R3,PLCB3,PLCB4,PLCD4,PLCL1,PRKACB,PRKAR2B,PRKCA,PRKCE,RRAS2
GNRH Signaling	5.33	0.197	0.392	ADCY1,ADCY8,ATF2,CACNA2D1,CACNA2D3,CACNB3,CACNB4,CACNG1,CACNG2,CACNG4,CAMK2G,CAMK4,CREB3L4,GNAI1,GNAQ,GNAS,GNB3,GNG2,GNRH1,HRAS,MAP2K2,MAPK10,MAPK3,MAPK8,NRAS,PAK2,PAK5,PLCB3,PLCB4,PRKACB,PRKAR2B,PRKCA,PRKCE,RRAS2
NER Pathway	5.24	0.233	1.789	CETN2,CHAF1A,CHAF1B,DDB2,GTF2H5,H4C1,H4C13,H4C4,H4C6,H4C9,LIG1,LIG4,NEDD8,PCNA,POLA2,POLD1,POLE2,POLR2J,POLR2L,PRIM1,RFC2,RFC3,RFC5,RPA3
Salvage Pathways of Pyrimidine Ribonucleotides	5.1	0.235	2.132	APOBEC2,CDK2,CDK5,CDK6,CDK8,DAPK1,GRK4,GRK5,IRAK1,MAP2K2,MAPK3,MAPK6,MAPK8,NEK2,NME4,PAK2,PAK5,PKN1,PLK1,PRKCE,PRKX,PSTK,TTK
Granzyme A Signaling	4.96	0.474	NaN	APEX1,H1-0,H1-1,H1-10,H1-2,H1-3,H1-4,H1-5,HMGB2
Androgen Signaling	4.9	0.206	-1	CACNA2D1,CACNA2D3,CACNB3,CACNB4,CACNG1,CACNG2,CACNG4,CAMK4,CCND1,GNAI1,GNAO1,GNAQ,GNAS,GNB2,GNB3,GNG2,GNG3,GNG4,GTF2H5,HSP90AA1,MAPK3,NCOA2,POLR2J,POLR2L,PRKACB,PRKAR2B,PRKCA,PRKCE
CXCR4 Signaling	4.82	0.192	1	ADCY1,ADCY8,AKT1,CRK,ELMO2,GNAI1,GNAO1,GNAQ,GNAS,GNB2,GNB3,GNG2,GNG3,GNG4,HRAS,MAP2K2,MAPK10,MAPK3,MAPK8,NRAS,PAK2,PAK5,PIK3R1,PIK3R3,PLCB3,PLCB4,PRKCA,PRKCE,RAC3,RHOU,RND2,RRAS2
Œ±-Adrenergic Signaling	4.74	0.229	-0.277	ADCY1,ADCY8,CAMK4,GNAI1,GNAQ,GNAS,GNB2,GNB3,GNG2,GNG3,GNG4,HRAS,MAP2K2,MAPK3,NRAS,PRKACB,PRKAR2B,PRKCA,PRKCE,PYGB,RRAS2,SLC8A1
DNA Methylation and Transcriptional Repression Signaling	4.67	0.343	NaN	DNMT1,DNMT3A,DNMT3B,H4C1,H4C13,H4C4,H4C6,H4C9,HDAC2,MTA2,RBBP4,SAP30
Senescence Pathway	4.62	0.164	-0.447	ACVR2B,AKT1,CAMK4,CBX8,CCNB1,CCNB2,CCND1,CDC25A,CDC25B,CDC25C,CDK2,CDK6,CDKN2A,CDKN2B,CHEK1,CHEK2,DHCR24,DMTF1,E2F1,E2F2,E2F3,E2F5,E2F7,E2F8,EIF4EBP1,EZH2,FOXO3,GADD45G,HRAS,MAP2K2,MAPK3,MAPK6,NFAT5,NRAS,PCGF1,PDK1,PHF19,PIK3R1,PIK3R3,PPP1CA,PPP2R3A,RPS6KA5,RRAS2,SMAD4,SMAD5
GPCR-Mediated Nutrient Sensing in Enteroendocrine Cells	4.59	0.214	-0.408	ADCY1,ADCY8,CACNA2D1,CACNA2D3,CACNB3,CACNB4,CACNG1,CACNG2,CACNG4,GNAI1,GNAQ,GNAS,GNG2,GNG3,GNG4,PLCB3,PLCB4,PLCD4,PLCL1,PRKACB,PRKAR2B,PRKCA,PRKCE,RAPGEF4
Estrogen Receptor Signaling	4.53	0.155	0.143	ADCY1,ADCY8,AKT1,ARG2,ATF2,BCL2,CCND1,CDK8,CFL1,CREB3L4,EIF4EBP1,FOXO3,GNAI1,GNAO1,GNAQ,GNAS,GNB3,GNG2,HIF1A,HRAS,HSP90AA1,HSP90AB1,IGF1R,MAP2K2,MAPK3,MDK,MED12L,MED30,MMP15,MMP16,NCOA2,NRAS,PCNA,PIK3R1,PIK3R3,PLCB3,PLCB4,PLCD4,PLCL1,PPARGC1A,PRKAB2,PRKACB,PRKAR2B,PRKCA,PRKCE,RRAS2,SDHC,SHC3,SHF,VEGFB,ZDHHC21
Glioblastoma Multiforme Signaling	4.52	0.188	1.279	AKT1,CCND1,CCNE1,CDK2,CDK6,CDKN2A,E2F1,E2F2,E2F3,E2F5,E2F7,E2F8,FZD3,FZD5,HRAS,IGF1R,MAP2K2,MAPK3,NRAS,PIK3R1,PIK3R3,PLCB3,PLCB4,PLCD4,PLCL1,RAC3,RHOU,RND2,RRAS2,TSC1,WNT5B
AMPK Signaling	4.43	0.173	-1.4	ACTL6B,AK3,AKT1,ATF2,CAB39,CAMKK2,CCNA2,CCND1,CHRNA3,CHRNB4,CREB3L4,DPF1,EIF4EBP1,FASN,FOXO3,GNAS,HLTF,HMGCR,PBRM1,PIK3R1,PIK3R3,PPARGC1A,PPAT,PPM1D,PPP2R3A,PRKAB2,PRKACB,PRKAR2B,RAB2A,RAB3A,RAB8A,RAB9B,SLC2A1,SMARCA4,SMARCB1,SMARCC1,TSC1
Cholesterol Biosynthesis I	4.41	0.538	2.646	DHCR24,DHCR7,EBP,FDFT1,NSDHL,SQLE,TM7SF2
Cholesterol Biosynthesis II (via 24,25-dihydrolanosterol)	4.41	0.538	2.646	DHCR24,DHCR7,EBP,FDFT1,NSDHL,SQLE,TM7SF2
Cholesterol Biosynthesis III (via Desmosterol)	4.41	0.538	2.646	DHCR24,DHCR7,EBP,FDFT1,NSDHL,SQLE,TM7SF2
Endocannabinoid Developing Neuron Pathway	4.39	0.209	1.706	ADCY1,ADCY8,AKT1,ATF2,CCND1,CNR1,CREB3L4,GNAI1,GNAO1,GNB3,GNG2,HRAS,MAP2K2,MAPK10,MAPK3,MAPK6,MAPK8,NRAS,PIK3R1,PIK3R3,PRKACB,PRKAR2B,RAC3,RRAS2
Chronic Myeloid Leukemia Signaling	4.24	0.214	NaN	AKT1,CCND1,CDK6,CDKN2A,CRK,E2F1,E2F2,E2F3,E2F5,E2F7,E2F8,GAB2,HDAC2,HRAS,MAP2K2,MAPK3,NRAS,PIK3R1,PIK3R3,RRAS2,SMAD4,SUV39H1
Prostate Cancer Signaling	4.09	0.22	NaN	AKT1,ATF2,BCL2,CCND1,CCNE1,CCNE2,CDK2,CREB3L4,E2F1,HRAS,HSP90AA1,HSP90AB1,MAP2K2,MAPK3,NRAS,PIK3R1,PIK3R3,RRAS2,SRD5A1,SUV39H1
Aryl Hydrocarbon Receptor Signaling	4.06	0.189	1.789	ALDH3A2,ALDH7A1,CCNA1,CCNA2,CCND1,CCNE1,CCNE2,CDK2,CDK6,CDKN2A,CHEK1,CHEK2,E2F1,GSTA4,GSTM1,GSTM3,GSTO2,GSTZ1,HSP90AA1,HSP90AB1,MAPK3,MAPK8,MCM7,NCOA2,NCOA7,NEDD8,SMARCA4
Purine Nucleotides De Novo Biosynthesis II	3.88	0.545	2.449	ADSL,ADSS1,IMPDH1,IMPDH2,PAICS,PPAT
Semaphorin Signaling in Neurons	3.87	0.25	NaN	CDK5,CFL1,CRMP1,DPYSL2,DPYSL3,DPYSL4,MAPK3,PAK2,PAK5,PLXNA1,PLXNB1,RAC3,RHOU,RND2,SEMA3A
Huntington's Disease Signaling	3.81	0.16	1.091	AKT1,ATF2,BDNF,CASP3,CDK5,CLTCL1,CREB3L4,CYCS,DNM1L,DYNC1I2,GLS,GNAQ,GNB2,GNB3,GNG2,GNG3,GNG4,HDAC2,HRAS,HSPA1L,HSPA5,IGF1R,MAPK3,MAPK8,NTRK1,PIK3R1,PIK3R3,PLCB3,PLCB4,POLR2J,POLR2L,PRKCA,PRKCE,RASA1,SH3GL3,SNAP25,TAF4,TCERG1
D-myo-inositol-5-phosphate Metabolism	3.74	0.178	0.378	CDC25A,CDC25B,CDC25C,DUSP16,EYA4,INPP5F,MINPP1,MTMR2,MTMR9,NUDT1,NUDT11,NUDT12,NUDT15,PDXP,PIP4P2,PLCB3,PLCB4,PLCD4,PLPP6,PLPP7,PPFIA2,PPP1CA,PPP1R1C,PPP2R3A,PTPRF,PTPRO,RASA1,STYXL1
Cell Cycle Regulation by BTG Family Proteins	3.69	0.297	2.53	CCND1,CCNE1,CCNE2,CDK2,E2F1,E2F2,E2F3,E2F5,E2F7,E2F8,PPP2R3A
Reelin Signaling in Neurons	3.58	0.186	0	AFDN,AKT1,APBB1,CAMK2G,CDH2,CDK5,CFL1,CNR1,CRK,DCX,LRP8,MAP1B,MAP2K2,MAPK10,MAPK3,MAPK8,MAPK8IP1,NECTIN3,PAFAH1B3,PDK1,PIK3R1,PIK3R3,VLDLR,WASF1
Corticotropin Releasing Hormone Signaling	3.56	0.179	0.392	ADCY1,ADCY8,ATF2,BDNF,CACNA2D1,CACNA2D3,CACNB3,CACNB4,CACNG1,CACNG2,CACNG4,CAMK4,CNR1,CREB3L4,GNAI1,GNAO1,GNAQ,GNAS,MAP2K2,MAPK3,NPR2,PRKACB,PRKAR2B,PRKCA,PRKCE,UCN
Semaphorin Neuronal Repulsive Signaling Pathway	3.52	0.185	0.408	AKT1,CDK5,CFL1,CRMP1,DPYSL2,DPYSL3,DPYSL4,FARP1,MAP2K2,NRP2,PAK2,PAK5,PIK3R1,PIK3R3,PLXNA1,PLXNA2,PLXNB1,PRKACB,PRKAR2B,SEMA3A,SEMA3E,SEMA6A,SEMA6D,SMC3
Apelin Endothelial Signaling Pathway	3.5	0.191	1.279	ADCY1,ADCY8,AKT1,CAMK4,GNAI1,GNAO1,GNAS,HIF1A,HRAS,MAP2K2,MAPK10,MAPK3,MAPK8,NRAS,PIK3R1,PIK3R3,PLCB3,PLCB4,PRKAB2,PRKCA,PRKCE,RRAS2
Melatonin Signaling	3.45	0.222	-1	CAMK2G,CAMK4,GNAI1,GNAO1,GNAQ,GNRH1,MAP2K2,MAPK3,PLCB3,PLCB4,PLCD4,PLCL1,PRKACB,PRKAR2B,PRKCA,PRKCE
CCR5 Signaling in Macrophages	3.42	0.202	-0.378	CACNA2D1,CACNA2D3,CACNB3,CACNB4,CACNG1,CACNG2,CACNG4,CAMK4,GNAI1,GNAS,GNB2,GNB3,GNG2,GNG3,GNG4,MAPK10,MAPK8,PRKCA,PRKCE
Adrenomedullin signaling pathway	3.41	0.162	1.095	ADCY1,ADCY8,AKT1,BCL2,CAMK4,CASP3,GNAQ,GNAS,HIF1A,HRAS,KCNN1,KCNQ2,MAP2K2,MAPK10,MAPK3,MAPK6,MAPK8,MYLK2,NPR2,NRAS,PIK3R1,PIK3R3,PLCB3,PLCB4,PLCD4,PLCL1,PRKACB,PRKAR2B,RRAS2,SHC3,SHF,TFAP2B
Sumoylation Pathway	3.33	0.194	-2	ARHGDIA,CBX4,DNMT3A,HDAC2,MAPK10,MAPK8,MYB,PCNA,PIAS4,RAC3,RAN,RANGAP1,RFC2,RFC3,RFC5,RHOU,RND2,SENP6,SENP7,SMAD4
Thrombin Signaling	3.31	0.159	0	ADCY1,ADCY8,AKT1,CAMK1,CAMK2G,CAMK4,GATA2,GATA3,GNAI1,GNAO1,GNAQ,GNAS,GNB2,GNB3,GNG2,GNG3,GNG4,HRAS,MAP2K2,MAPK3,NRAS,PIK3R1,PIK3R3,PLCB3,PLCB4,PLCD4,PLCL1,PRKCA,PRKCE,RAC3,RHOU,RND2,RRAS2
Colorectal Cancer Metastasis Signaling	3.24	0.15	1.061	ADCY1,ADCY8,AKT1,BIRC5,CASP3,CCND1,DCC,FZD3,FZD5,GNAS,GNB2,GNB3,GNG2,GNG3,GNG4,GRK3,HRAS,MAP2K2,MAPK10,MAPK3,MAPK8,MMP15,MMP16,NRAS,PIK3R1,PIK3R3,PRKACB,PRKAR2B,PTGER3,RAC3,RALGDS,RHOU,RND2,RRAS2,SMAD4,TCF4,VEGFB,WNT5B
G-Protein Coupled Receptor Signaling	3.19	0.147	NaN	ADCY1,ADCY8,ADORA2A,AKT1,APEX1,ATF2,CAMK2G,CAMK4,CNR1,CREB3L4,DRD5,DUSP9,GABBR2,GDPD1,GNAI1,GNAO1,GNAQ,GNAS,GRK4,GRM8,HRAS,MAP2K2,MAPK3,MPPED2,NRAS,PDE11A,PIK3R1,PIK3R3,PLCB3,PLCB4,PRKACB,PRKAR2B,PRKCA,PRKCE,PTGER3,RAPGEF4,RASA1,RGS4,RGS7,RRAS2
p53 Signaling	3.18	0.194	-1.069	AKT1,BCL2,BIRC5,CCND1,CCNG1,CDK2,CDKN2A,CHEK1,CHEK2,E2F1,GADD45G,HIF1A,MAPK8,MDM4,PCNA,PIK3R1,PIK3R3,TOPBP1,TP53I3
Synaptic Long Term Potentiation	3.18	0.178	-0.426	ADCY1,ADCY8,ATF2,CAMK2G,CAMK4,CREB3L4,GNAQ,GRIA2,GRM8,HRAS,MAP2K2,MAPK3,NRAS,PLCB3,PLCB4,PLCD4,PLCL1,PPP1CA,PRKACB,PRKAR2B,PRKCA,PRKCE,RRAS2
White Adipose Tissue Browning Pathway	3.18	0.178	1.043	ADCY1,ADCY8,ATF2,BDNF,BMP7,CACNA2D1,CACNA2D3,CACNB3,CACNB4,CACNG1,CACNG2,CACNG4,CAMKK2,CREB3L4,FGFR2,FNDC5,GNAS,LDHA,PPARGC1A,PRKAB2,PRKACB,PRKAR2B,RUNX1T1
GADD45 Signaling	3.15	0.368	NaN	CCNB1,CCND1,CCNE1,CCNE2,CDK2,GADD45G,PCNA
Dopamine Receptor Signaling	3.11	0.208	0.707	ADCY1,ADCY8,DDC,DRD5,GCH1,MAOA,PCBD1,PPP1CA,PPP2R3A,PRKACB,PRKAR2B,PTS,QDPR,SLC18A1,SLC18A2,TH
BMP signaling pathway	3.06	0.2	1	ATF2,BMP7,BMPR1B,CAMK4,HRAS,MAP2K2,MAPK10,MAPK3,MAPK8,NRAS,PRKACB,PRKAR2B,RRAS2,SMAD4,SMAD5,TLX2,ZNF423
CCR3 Signaling in Eosinophils	3.04	0.177	1.604	CAMK4,CFL1,GNAI1,GNAS,GNB2,GNB3,GNG2,GNG3,GNG4,HRAS,MAP2K2,MAPK3,NRAS,PAK2,PAK5,PIK3R1,PIK3R3,PLCB3,PLCB4,PRKCA,PRKCE,RRAS2
G Protein Signaling Mediated by Tubby	3.03	0.29	NaN	GNAQ,GNAS,GNB2,GNB3,GNG2,GNG3,GNG4,PLCB3,PLCB4
Neuropathic Pain Signaling In Dorsal Horn Neurons	3.01	0.188	-1.147	BDNF,CAMK1,CAMK2G,CAMK4,GRIA2,GRM8,KCNN1,KCNQ2,MAPK3,PIK3R1,PIK3R3,PLCB3,PLCB4,PLCD4,PLCL1,PRKACB,PRKAR2B,PRKCA,PRKCE
Superpathway of Inositol Phosphate Compounds	3.01	0.156	0.539	CDC25A,CDC25B,CDC25C,CDIPT,DUSP16,EYA4,INPP5F,MINPP1,MTMR2,MTMR9,NUDT1,NUDT11,NUDT12,NUDT15,PDXP,PIK3R1,PIK3R3,PIP4P2,PLCB3,PLCB4,PLCD4,PLPP6,PLPP7,PPFIA2,PPP1CA,PPP1R1C,PPP2R3A,PTPRF,PTPRO,RASA1,STYXL1
GŒ±i Signaling	2.99	0.176	0.943	ADCY1,ADCY8,CNR1,GABBR2,GNAI1,GNAS,GNB2,GNB3,GNG2,GNG3,GNG4,GRM8,HRAS,MAPK3,NRAS,PRKACB,PRKAR2B,PTGER3,RALGDS,RGS4,RGS7,RRAS2
3-phosphoinositide Biosynthesis	2.98	0.163	0.577	CDC25A,CDC25B,CDC25C,CDIPT,DUSP16,EYA4,INPP5F,MINPP1,MTMR2,MTMR9,NUDT1,NUDT11,NUDT12,NUDT15,PDXP,PIK3R1,PIK3R3,PLPP6,PLPP7,PPFIA2,PPP1CA,PPP1R1C,PPP2R3A,PTPRF,PTPRO,RASA1,STYXL1
Melanocyte Development and Pigmentation Signaling	2.98	0.191	0.943	ADCY1,ADCY8,ATF2,BCL2,CREB3L4,CRK,GNAS,HRAS,MAP2K2,MAPK3,NRAS,PIK3R1,PIK3R3,PRKACB,PRKAR2B,RPS6KA5,RPS6KA6,RRAS2
Ephrin B Signaling	2.96	0.208	-0.333	CFL1,EFNB2,EPHB3,GNAI1,GNAO1,GNAQ,GNAS,GNB2,GNB3,GNG2,GNG3,GNG4,HRAS,MAPK3,RAC3
D-myo-inositol (1,4,5,6)-Tetrakisphosphate Biosynthesis	2.95	0.169	0.408	CDC25A,CDC25B,CDC25C,DUSP16,EYA4,INPP5F,MINPP1,MTMR2,MTMR9,NUDT1,NUDT11,NUDT12,NUDT15,PDXP,PLPP6,PLPP7,PPFIA2,PPP1CA,PPP1R1C,PPP2R3A,PTPRF,PTPRO,RASA1,STYXL1
D-myo-inositol (3,4,5,6)-tetrakisphosphate Biosynthesis	2.95	0.169	0.408	CDC25A,CDC25B,CDC25C,DUSP16,EYA4,INPP5F,MINPP1,MTMR2,MTMR9,NUDT1,NUDT11,NUDT12,NUDT15,PDXP,PLPP6,PLPP7,PPFIA2,PPP1CA,PPP1R1C,PPP2R3A,PTPRF,PTPRO,RASA1,STYXL1
Netrin Signaling	2.95	0.215	-1.069	CACNA2D1,CACNA2D3,CACNB3,CACNB4,CACNG1,CACNG2,CACNG4,DCC,ENAH,NFAT5,PRKACB,PRKAR2B,RAC3,UNC5C
Regulation of Cellular Mechanics by Calpain Protease	2.95	0.215	0	ACTN2,ACTN3,CCNA1,CCNA2,CCND1,CCNE1,CDK2,CDK6,CNGB1,HRAS,MAPK3,NRAS,RRAS2,TLN2
Renin-Angiotensin Signaling	2.94	0.178	0.229	ADCY1,ADCY8,ATF2,GNAQ,HRAS,MAP2K2,MAPK10,MAPK3,MAPK8,NRAS,PAK2,PAK5,PIK3R1,PIK3R3,PRKACB,PRKAR2B,PRKCA,PRKCE,RRAS2,SHC3,SHF
cAMP-mediated signaling	2.91	0.149	0.186	ADCY1,ADCY8,ADORA2A,AKAP11,AKAP6,AKAP9,APEX1,ATF2,CAMK1,CAMK2G,CAMK4,CNGB1,CNR1,CREB3L4,DRD5,DUSP9,GABBR2,GDPD1,GNAI1,GNAO1,GNAS,GRK4,GRM8,MAP2K2,MAPK3,MPPED2,PDE11A,PKIA,PRKACB,PRKAR2B,PTGER3,RAPGEF4,RGS4,RGS7
Endocannabinoid Cancer Inhibition Pathway	2.91	0.168	-1.633	ADCY1,ADCY8,AKT1,ATF2,CAMKK2,CASP3,CCND1,CCNE1,CCNE2,CNR1,CREB3L4,GNAI1,GNAO1,GNAQ,HIF1A,MAP2K2,MAPK3,PIK3R1,PIK3R3,PRKAB2,PRKACB,PRKAR2B,TCF4,VEGFB
14-3-3-mediated Signaling	2.9	0.173	0.943	AKT1,HRAS,MAP2K2,MAPK10,MAPK3,MAPK8,NRAS,PIK3R1,PIK3R3,PLCB3,PLCB4,PLCD4,PLCL1,PRKCA,PRKCE,RRAS2,SRPK2,TSC1,TUBA1A,TUBA1C,TUBB,YWHAH
Non-Small Cell Lung Cancer Signaling	2.9	0.205	2.309	AKT1,CCND1,CDK6,CDKN2A,E2F1,FOXO3,HRAS,MAP2K2,MAPK3,NRAS,PIK3R1,PIK3R3,PRKCA,RRAS2,SUV39H1
Mismatch Repair in Eukaryotes	2.81	0.375	NaN	EXO1,PCNA,POLD1,RFC2,RFC3,RFC5
FcŒ≥RIIB Signaling in B Lymphocytes	2.77	0.2	1.414	AKT1,CACNA2D1,CACNA2D3,CACNB3,CACNB4,CACNG1,CACNG2,CACNG4,HRAS,MAPK10,MAPK8,NRAS,PIK3R1,PIK3R3,RRAS2
Ephrin Receptor Signaling	2.77	0.156	2.132	AKT1,ATF2,CFL1,CREB3L4,CRK,EFNA3,EFNB2,EPHA5,EPHB3,GNAI1,GNAO1,GNAQ,GNAS,GNB2,GNB3,GNG2,GNG3,GNG4,HRAS,MAP2K2,MAPK3,NRAS,PAK2,PAK5,RAC3,RASA1,RRAS2,VEGFB
Synaptic Long Term Depression	2.75	0.153	0.186	ABHD3,CACNA2D1,CACNA2D3,CACNB3,CACNB4,CACNG1,CACNG2,CACNG4,GNAI1,GNAO1,GNAQ,GNAS,GRIA2,GRM8,HRAS,IGF1R,MAP2K2,MAPK3,NPR2,NRAS,PLCB3,PLCB4,PLCD4,PLCL1,PNPLA3,PPP2R3A,PRKCA,PRKCE,RRAS2
3-phosphoinositide Degradation	2.71	0.16	0.2	CDC25A,CDC25B,CDC25C,DUSP16,EYA4,INPP5F,MINPP1,MTMR2,MTMR9,NUDT1,NUDT11,NUDT12,NUDT15,PDXP,PIP4P2,PLPP6,PLPP7,PPFIA2,PPP1CA,PPP1R1C,PPP2R3A,PTPRF,PTPRO,RASA1,STYXL1
GŒ±s Signaling	2.71	0.178	0.258	ADCY1,ADCY8,ADORA2A,ATF2,CNGB1,CNR1,CREB3L4,DRD5,GNAS,GNB2,GNB3,GNG2,GNG3,GNG4,MAP2K2,MAPK3,PRKACB,PRKAR2B,RAPGEF4
HER-2 Signaling in Breast Cancer	2.69	0.19	NaN	AKT1,CCND1,CCNE1,CCNE2,CDK6,HRAS,NRAS,NRG1,PARD6A,PARD6G,PIK3R1,PIK3R3,PRKCA,PRKCE,RRAS2,TSC1
fMLP Signaling in Neutrophils	2.66	0.172	0.728	CAMK4,GNAI1,GNAS,GNB2,GNB3,GNG2,GNG3,GNG4,HRAS,MAP2K2,MAPK3,NFAT5,NRAS,PIK3R1,PIK3R3,PLCB3,PLCB4,PRKCA,PRKCE,RRAS2
RAN Signaling	2.65	0.353	0.816	KPNA2,KPNA5,KPNB1,RAN,RANGAP1,TNPO1
BER pathway	2.64	0.417	NaN	APEX1,LIG1,OGG1,PCNA,POLB
Sirtuin Signaling Pathway	2.63	0.137	0.686	AKT1,APEX1,ARG2,E2F1,FOXO3,GABPB2,GADD45G,GLS,GOT2,H1-0,H1-1,H1-10,H1-2,H1-3,H1-4,H1-5,H3-4,HIF1A,LDHA,MAPK3,MAPK6,NDUFA3,NDUFA4L2,OGG1,PDK1,PGAM2,PGK1,POLR3D,PPARGC1A,RBBP8,RRP9,SDHC,SIRT4,SLC25A4,SLC2A1,SUV39H1,TIMM10,TRIM28,TUBA1A,TUBA1C
Catecholamine Biosynthesis	2.62	0.75	NaN	DDC,PNMT,TH
eNOS Signaling	2.6	0.157	0.229	ADCY1,ADCY8,AKT1,BDKRB1,CAMK4,CASP3,CCNA1,CCNA2,CHRNA3,CHRNB4,CNGB1,GNAQ,GNAS,HSP90AA1,HSP90AB1,HSPA1L,HSPA5,PIK3R1,PIK3R3,PRKAB2,PRKACB,PRKAR2B,PRKCA,PRKCE,VEGFB
PTEN Signaling	2.58	0.167	-0.229	AKT1,BCL2,BMPR1B,CASP3,CCND1,FGFR2,FOXO3,HRAS,IGF1R,INPP5F,MAGI1,MAGI2,MAP2K2,MAPK3,NRAS,NTRK1,PIK3R1,PIK3R3,RAC3,RRAS2,YWHAH
Small Cell Lung Cancer Signaling	2.56	0.197	1.265	AKT1,BCL2,CCND1,CCNE1,CCNE2,CDK2,CDK6,CDKN2B,CYCS,E2F1,PIK3R1,PIK3R3,SKP2,SUV39H1
Thyroid Cancer Signaling	2.54	0.19	1.807	AKT1,ALK,BDNF,CCND1,HRAS,MAP2K2,MAPK3,NRAS,NTRK1,PDK1,PIK3R1,PIK3R3,RET,RRAS2,TCF4
BEX2 Signaling Pathway	2.54	0.19	1.291	AKT1,BCL2,BEX1,CCND1,CDH2,HIF1A,KLK1,MAPK10,MAPK8,PLXNC1,PPP2R3A,SMARCB1,TCF4,TSC1,VEGFB
Cardiac Hypertrophy Signaling	2.53	0.142	0.378	ADCY1,ADCY8,AKT1,ATF2,CAMK4,GNAI1,GNAO1,GNAQ,GNAS,GNB2,GNB3,GNG2,GNG3,GNG4,HAND2,HRAS,IGF1R,MAP2K2,MAPK10,MAPK3,MAPK8,NRAS,PIK3R1,PIK3R3,PLCB3,PLCB4,PLCD4,PLCL1,PRKACB,PRKAR2B,RAC3,RHOU,RND2,RRAS2
Serotonin Receptor Signaling	2.51	0.233	NaN	ADCY1,ADCY8,DDC,GCH1,MAOA,PCBD1,PTS,QDPR,SLC18A1,SLC18A2
Melanoma Signaling	2.51	0.22	1.897	AKT1,CCND1,CDKN2A,E2F1,HRAS,MAP2K2,MAPK3,NRAS,PIK3R1,PIK3R3,RRAS2
Endothelin-1 Signaling	2.49	0.149	0.784	ABHD3,ADCY1,ADCY8,CASP3,ECE2,GNAI1,GNAO1,GNAQ,GNAS,HRAS,MAPK10,MAPK3,MAPK6,MAPK8,NRAS,PIK3R1,PIK3R3,PLCB3,PLCB4,PLCD4,PLCL1,PLD5,PNPLA3,PRKCA,PRKCE,RRAS2,SHC3,SHF
Renal Cell Carcinoma Signaling	2.48	0.188	0.905	AKT1,CRK,CUL2,EGLN3,HIF1A,HRAS,MAP2K2,MAPK3,NRAS,PAK2,PAK5,PIK3R1,PIK3R3,RRAS2,SLC2A1
Chemokine Signaling	2.48	0.188	-0.258	CAMK1,CAMK2G,CAMK4,CFL1,GNAI1,GNAQ,HRAS,MAP2K2,MAPK3,MAPK8,NRAS,PLCB3,PLCB4,PRKCA,RRAS2
Germ Cell-Sertoli Cell Junction Signaling	2.47	0.152	NaN	ACTN2,ACTN3,AFDN,AKT1,CDH2,CFL1,HRAS,MAP2K2,MAPK10,MAPK3,MAPK8,MTMR2,NECTIN3,NRAS,PAK2,PAK5,PIK3R1,PIK3R3,PLS1,RAC3,RHOU,RND2,RRAS2,TUBA1A,TUBA1C,TUBB
TGF-Œ≤ Signaling	2.47	0.177	1.508	ACVR2B,AMH,AMHR2,BCL2,BMP7,BMPR1B,HRAS,MAP2K2,MAPK3,MAPK8,NRAS,PIAS4,RRAS2,SMAD4,SMAD5,TLX2,ZNF423
Gap Junction Signaling	2.45	0.146	NaN	ADCY1,ADCY8,AKT1,GJC1,GNAI1,GNAQ,GNAS,GRIA2,GRIK1,GRIK2,HRAS,MAP2K2,MAPK3,NPR2,NRAS,PIK3R1,PIK3R3,PLCB3,PLCB4,PLCD4,PLCL1,PRKACB,PRKAR2B,PRKCA,PRKCE,RRAS2,TUBA1A,TUBA1C,TUBB
Ovarian Cancer Signaling	2.39	0.158	0.577	AKT1,BCL2,BRCA2,CCND1,CDKN2A,E2F1,FZD3,FZD5,HRAS,MAP2K2,MAPK3,NRAS,PIK3R1,PIK3R3,PRKACB,PRKAR2B,RAD51,RRAS2,SUV39H1,TCF4,VEGFB,WNT5B
Estrogen-Dependent Breast Cancer Signaling	2.39	0.189	1.508	AKT1,ATF2,CCND1,CREB3L4,HRAS,HSD17B10,HSD17B11,HSD17B8,IGF1R,MAPK3,NRAS,PIK3R1,PIK3R3,RRAS2
Leptin Signaling in Obesity	2.39	0.189	0	ADCY1,ADCY8,AKT1,MAP2K2,MAPK3,NPY,PIK3R1,PIK3R3,PLCB3,PLCB4,PLCD4,PLCL1,PRKACB,PRKAR2B
IL-8 Signaling	2.39	0.145	1.8	AKT1,BCL2,CCND1,EIF4EBP1,GNAI1,GNAS,GNB2,GNB3,GNG2,GNG3,GNG4,HRAS,IRAK1,MAP2K2,MAPK10,MAPK3,MAPK8,NRAS,PAK2,PIK3R1,PIK3R3,PLD5,PRKCA,PRKCE,RAC3,RHOU,RND2,RRAS2,VEGFB
Apelin Adipocyte Signaling Pathway	2.38	0.183	0.775	ADCY1,ADCY8,GNAI1,GPX7,GSTM1,GSTZ1,HIF1A,MAPK10,MAPK3,MAPK6,MAPK8,PPARGC1A,PRKAB2,PRKACB,PRKAR2B
DNA damage-induced 14-3-3œÉ Signaling	2.38	0.316	NaN	AKT1,CCNB1,CCNB2,CCNE1,CCNE2,CDK2
UVA-Induced MAPK Signaling	2.37	0.173	1.387	CASP3,CYCS,HRAS,MAPK10,MAPK3,MAPK8,NRAS,PIK3R1,PIK3R3,PLCB3,PLCB4,PLCD4,PLCL1,PRKCA,RPS6KA5,RPS6KA6,RRAS2
UVB-Induced MAPK Signaling	2.37	0.212	0.632	AKT1,EIF4EBP1,H3-4,MAPK10,MAPK3,MAPK8,PIK3R1,PIK3R3,PRKCA,PRKCE,RPS6KA5
IL-1 Signaling	2.32	0.176	0	ADCY1,ADCY8,GNAI1,GNAO1,GNAQ,GNAS,GNB2,GNB3,GNG2,GNG3,GNG4,IRAK1,MAPK10,MAPK8,PRKACB,PRKAR2B
Cardiac Œ≤-adrenergic Signaling	2.32	0.156	-0.302	ADCY1,ADCY8,AKAP11,AKAP6,AKAP9,APEX1,GDPD1,GNAS,GNB2,GNB3,GNG2,GNG3,GNG4,GRK3,MPPED2,PDE11A,PKIA,PPP1CA,PPP2R3A,PRKACB,PRKAR2B,SLC8A1
Folate Transformations I	2.31	0.444	2	MTHFD1,MTHFD2,MTHFD2L,SHMT2
Mevalonate Pathway I	2.3	0.357	2	ACAA2,ACAT2,HMGCR,HMGCS1,IDI1
Sertoli Cell-Sertoli Cell Junction Signaling	2.3	0.146	NaN	ACTN2,ACTN3,AFDN,AKT1,ATF2,CLDN10,DLG1,HRAS,MAGI2,MAP2K2,MAPK10,MAPK3,MAPK8,MPP6,MTMR2,NECTIN1,NECTIN3,NRAS,PLS1,PRKACB,PRKAR2B,RRAS2,SPTAN1,SPTBN2,TUBA1A,TUBA1C,TUBB
CDK5 Signaling	2.29	0.167	1.414	ADCY1,ADCY8,BDNF,CDK5,DRD5,GNAS,HRAS,MAP2K2,MAPK10,MAPK3,MAPK6,MAPK8,NRAS,PPP1CA,PPP2R3A,PRKACB,PRKAR2B,RRAS2
Neurotrophin/TRK Signaling	2.28	0.184	1.732	AKT1,ATF2,BDNF,CREB3L4,HRAS,MAP2K2,MAPK3,MAPK8,NRAS,NTRK1,PIK3R1,PIK3R3,RRAS2,SORCS1
Tetrahydrofolate Salvage from 5,10-methenyltetrahydrofolate	2.25	0.6	NaN	MTHFD1,MTHFD2,MTHFD2L
Lysine Degradation II	2.25	0.6	NaN	AADAT,AASDHPPT,ALDH7A1
Lysine Degradation V	2.25	0.6	NaN	AADAT,AASDHPPT,ALDH7A1
Antiproliferative Role of Somatostatin Receptor 2	2.23	0.182	1.265	GNB2,GNB3,GNG2,GNG3,GNG4,HRAS,MAP2K2,MAPK3,NPR2,NRAS,PIK3R1,PIK3R3,RRAS2,SST
Breast Cancer Regulation by Stathmin1	2.19	0.117	NaN	ADGRA3,ADGRB2,ADGRB3,ADGRG1,ADGRL3,ADGRV1,ADORA2A,ATF2,AURKA,BDKRB1,CAMK1,CAMK2G,CAMK4,CCND1,CCR10,CDK2,CDK6,CNR1,CREB3L4,DRD5,E2F1,E2F2,E2F3,E2F5,E2F7,E2F8,FOXM1,FZD3,FZD5,GABBR2,GNAQ,GNB2,GNB3,GNG2,GNG3,GNG4,GPR158,GPR161,GPR162,GPR19,GPR22,GPR26,GPR27,GPR85,GRM8,HIF1A,HRAS,MAP2K2,MAPK3,NPY2R,NRAS,PIK3R1,PIK3R3,PLCB3,PLCB4,PPP1CA,PPP2R3A,PRKACB,PRKAR2B,PRKCA,PRKCE,PTGER3,RAC3,RRAS2,SIVA1,TUBA1A…
Dopamine-DARPP32 Feedback in cAMP Signaling	2.15	0.147	0.853	ADCY1,ADCY8,ATF1,ATF2,CAMK4,CAMKK2,CDK5,CREB3L4,DRD5,GNAI1,GNAQ,GNAS,KCNJ6,KCNJ9,PLCB3,PLCB4,PLCD4,PLCL1,PPP1CA,PPP2R3A,PRKACB,PRKAR2B,PRKCA,PRKCE
Epoxysqualene Biosynthesis	2.13	1	NaN	FDFT1,SQLE
FLT3 Signaling in Hematopoietic Progenitor Cells	2.08	0.175	1.604	AKT1,ATF2,CREB3L4,EIF4EBP1,GAB2,HRAS,MAP2K2,MAPK3,NRAS,PIK3R1,PIK3R3,RPS6KA5,RPS6KA6,RRAS2
Role of MAPK Signaling in the Pathogenesis of Influenza	2.08	0.175	NaN	ABHD3,AKT1,ATF2,BCL2,CASP3,HRAS,MAP2K2,MAPK10,MAPK3,MAPK8,NRAS,PNPLA3,PRKCA,RRAS2
ERK/MAPK Signaling	2.06	0.14	0	ATF1,ATF2,CREB3L4,CRK,DUSP9,EIF4EBP1,H3-4,HRAS,MAP2K2,MAPK3,NRAS,PAK2,PAK5,PIK3R1,PIK3R3,PPP1CA,PPP2R3A,PRKACB,PRKAR2B,PRKCA,PRKCE,RAC3,RAPGEF4,RPS6KA5,RRAS2,TLN2,YWHAH
CNTF Signaling	2.05	0.193	1.508	AKT1,CNTFR,HRAS,MAP2K2,MAPK3,NRAS,PIK3R1,PIK3R3,RPS6KA5,RPS6KA6,RRAS2
Glutamate Receptor Signaling	2.05	0.193	-1	CAMK4,GLS,GNB3,GNG2,GRIA2,GRIK1,GRIK2,GRM8,SLC1A1,SLC1A2,SLC1A4
Bladder Cancer Signaling	2.05	0.165	1.667	CCND1,CDKN2A,DAPK1,E2F1,FGF17,FGF19,HRAS,MAP2K2,MAPK3,MMP15,MMP16,NRAS,RPS6KA5,RRAS2,SUV39H1,VEGFB
GPCR-Mediated Integration of Enteroendocrine Signaling Exemplified by an L Cell	2.03	0.178	-0.277	ADCY1,ADCY8,GNAI1,GNAQ,GNAS,NPY2R,PLCB3,PLCB4,PLCD4,PLCL1,PRKACB,PRKAR2B,SST
Granzyme B Signaling	2.03	0.312	0.447	CASP3,CYCS,ENDOG,LMNB1,LMNB2
GŒ±q Signaling	2.03	0.146	0.471	AKT1,CAMK4,GNAQ,GNAS,GNB2,GNB3,GNG2,GNG3,GNG4,MAP2K2,MAPK3,PIK3R1,PIK3R3,PLCB3,PLCB4,PLD5,PRKCA,PRKCE,RAC3,RGS4,RGS7,RHOU,RND2
RAR Activation	2.03	0.139	NaN	ACTL6B,ADCY1,ADCY8,AKT1,DPF1,GTF2H5,HLTF,MAPK10,MAPK8,NR2F6,PBRM1,PIK3R1,PIK3R3,PPARGC1A,PRKACB,PRKAR2B,PRKCA,PRKCE,PSMC5,RBP1,RDH5,SMAD4,SMAD5,SMARCA4,SMARCB1,SMARCC1,TAF4
Relaxin Signaling	2	0.147	0	ADCY1,ADCY8,AKT1,APEX1,GDPD1,GNAI1,GNAO1,GNAQ,GNAS,GNB2,GNB3,GNG2,GNG3,GNG4,MAPK3,MPPED2,NPR2,PDE11A,PIK3R1,PIK3R3,PRKACB,PRKAR2B
HIF1Œ± Signaling	1.97	0.137	1.347	AKT1,APEX1,CAMK1,CAMK2G,CAMK4,CUL2,EGLN3,EIF4EBP1,GCK,HIF1A,HRAS,HSP90AA1,HSPA1L,HSPA5,LDHA,MAP2K2,MAPK3,MMP15,MMP16,NRAS,PIK3R1,PIK3R3,PRKCA,PRKCE,RAN,RRAS2,SLC2A1,VEGFB
VEGF Signaling	1.97	0.162	1.604	ACTN2,ACTN3,AKT1,BCL2,EIF2S2,FOXO3,HIF1A,HRAS,MAP2K2,MAPK3,NRAS,PIK3R1,PIK3R3,PRKCA,RRAS2,VEGFB
Apelin Cardiomyocyte Signaling Pathway	1.97	0.162	0	AKT1,GNAI1,HIF1A,MAPK10,MAPK3,MAPK6,MAPK8,PIK3R1,PIK3R3,PLCB3,PLCB4,PLCD4,PLCL1,PRKCA,PRKCE,SLC8A1
Calcium Signaling	1.95	0.136	-0.816	ATF2,ATP2B1,CACNA2D1,CACNA2D3,CACNB3,CACNB4,CACNG1,CACNG2,CACNG4,CAMK1,CAMK2G,CAMK4,CAMKK2,CHRNA3,CHRNB4,CREB3L4,GRIA2,GRIK1,HDAC2,MAPK3,MYH10,MYH3,NFAT5,PNCK,PRKACB,PRKAR2B,SLC8A1,TPM1
Epithelial Adherens Junction Signaling	1.94	0.145	NaN	ACTN2,ACTN3,ACVR2B,AFDN,AKT1,CDH2,CRK,HRAS,MAGI1,MAGI2,MYH10,MYH3,NECTIN1,NECTIN3,NRAS,RRAS2,SSX2IP,TCF4,TUBA1A,TUBA1C,TUBB,WASF1
FGF Signaling	1.9	0.167	1.069	AKT1,ATF2,CREB3L4,CRK,FGF17,FGF19,FGFR2,HRAS,MAPK3,MAPK8,PIK3R1,PIK3R3,PRKCA,RPS6KA5
GDNF Family Ligand-Receptor Interactions	1.89	0.171	1.155	DOK4,GFRA2,HRAS,MAP2K2,MAPK10,MAPK3,MAPK8,NRAS,PIK3R1,PIK3R3,RASA1,RET,RRAS2
ErbB Signaling	1.83	0.16	1.291	AKT1,HRAS,MAP2K2,MAPK10,MAPK3,MAPK8,NRAS,NRG1,PAK2,PAK5,PIK3R1,PIK3R3,PRKCA,PRKCE,RRAS2
PFKFB4 Signaling Pathway	1.81	0.196	0.707	ATF2,CREB3L4,GCK,GNAS,MAP2K2,MAPK3,PRKACB,PRKAR2B,RPS6KA5
Rac Signaling	1.8	0.152	1	ANK1,CFL1,CYFIP2,HRAS,MAP2K2,MAPK3,MAPK8,NCKAP1,NRAS,PAK2,PAK5,PARD6A,PIK3R1,PIK3R3,RRAS2,SH3RF1,WASF1
Superpathway of Geranylgeranyldiphosphate Biosynthesis I (via Mevalonate)	1.8	0.278	2	ACAA2,ACAT2,HMGCR,HMGCS1,IDI1
Wnt/Ca+ pathway	1.79	0.177	0.905	ATF2,CREB3L4,FZD3,FZD5,NFAT5,PLCB3,PLCB4,PLCD4,PLCL1,PRKCA,WNT5B
IGF-1 Signaling	1.77	0.154	0	AKT1,FOXO3,HRAS,IGF1R,MAP2K2,MAPK3,MAPK8,NRAS,PIK3R1,PIK3R3,PRKACB,PRKAR2B,RASA1,RRAS2,SOCS2,YWHAH
Superpathway of Serine and Glycine Biosynthesis I	1.76	0.429	NaN	DUSP26,PSAT1,SHMT2
Aldosterone Signaling in Epithelial Cells	1.75	0.139	0.302	AHCY,DNAJB5,DNAJC12,HSP90AA1,HSP90AB1,HSPA1L,HSPA4L,HSPA5,HSPD1,HSPH1,MAP2K2,MAPK3,PIK3R1,PIK3R3,PLCB3,PLCB4,PLCD4,PLCL1,PRKCA,PRKCE,SACS,SASS6
Neuregulin Signaling	1.75	0.156	1.732	AKT1,CDK5,CRK,HRAS,HSP90AA1,HSP90AB1,MAP2K2,MAPK3,NRAS,NRG1,PIK3R1,PIK3R3,PRKCA,PRKCE,RRAS2
NGF Signaling	1.73	0.149	1.213	AKT1,ATF2,CREB3L4,CRK,HRAS,MAP2K2,MAPK10,MAPK3,MAPK8,NRAS,NTRK1,PIK3R1,PIK3R3,RPS6KA5,RPS6KA6,RRAS2,TRIO
Factors Promoting Cardiogenesis in Vertebrates	1.72	0.14	1.091	ACVR2B,ATF2,BMP7,BMPR1B,CAMK2G,CCND1,CREB3L4,FZD3,FZD5,MAPK10,MAPK8,PLCB3,PLCB4,PLCD4,PLCL1,PRKCA,PRKCE,SMAD4,SMAD5,TCF4,WNT5B
PAK Signaling	1.71	0.155	0.535	CASP3,CFL1,DSCAM,EPHB3,HRAS,MAP2K2,MAPK10,MAPK3,MAPK8,NRAS,PAK2,PAK5,PIK3R1,PIK3R3,RRAS2
ERK5 Signaling	1.7	0.167	1.732	AKT1,ATF2,CREB3L4,FOXO3,GNAQ,HRAS,NRAS,NTRK1,RPS6KA5,RPS6KA6,RRAS2,YWHAH
Type II Diabetes Mellitus Signaling	1.69	0.141	0.632	ACSL3,AKT1,CACNA2D1,CACNA2D3,CACNB3,CACNB4,CACNG1,CACNG2,CACNG4,GCK,MAPK10,MAPK3,MAPK8,PIK3R1,PIK3R3,PRKAB2,PRKCA,PRKCE,SLC27A2,SOCS2
Tetrahydrobiopterin Biosynthesis I	1.68	0.667	NaN	GCH1,PTS
Inosine-5'-phosphate Biosynthesis II	1.68	0.667	NaN	ADSL,PAICS
Tetrahydrobiopterin Biosynthesis II	1.68	0.667	NaN	GCH1,PTS
Adipogenesis pathway	1.66	0.142	NaN	AKT1,BMP7,CDK5,DLK1,EBF1,EZH2,FBXW7,FGFR2,FZD3,FZD5,GTF2H5,HDAC2,HIF1A,RBBP4,RBP1,RUNX1T1,SAP30,SMAD5,ZNF423
Mechanisms of Viral Exit from Host Cells	1.65	0.195	NaN	LMNB1,LMNB2,PRKCA,PRKCE,SH3GL2,SH3GL3,SH3GLB2,VPS37C
nNOS Signaling in Skeletal Muscle Cells	1.65	0.195	NaN	CACNA2D1,CACNA2D3,CACNB3,CACNB4,CACNG1,CACNG2,CACNG4,CAMK4
PPARŒ±/RXRŒ± Activation	1.64	0.132	-0.894	ACVR2B,ADCY1,ADCY8,FASN,GNAQ,GNAS,GOT2,HRAS,HSP90AA1,HSP90AB1,MAP2K2,MAPK3,MAPK8,NRAS,PLCB3,PLCB4,PLCD4,PLCL1,PPARGC1A,PRKAB2,PRKACB,PRKAR2B,PRKCA,RRAS2,SMAD4
LPS-stimulated MAPK Signaling	1.63	0.159	1.387	ATF1,ATF2,HRAS,MAP2K2,MAPK10,MAPK3,MAPK8,NRAS,PIK3R1,PIK3R3,PRKCA,PRKCE,RRAS2
Hypoxia Signaling in the Cardiovascular System	1.61	0.162	2.236	AKT1,ATF2,CREB3L4,HIF1A,HSP90AA1,HSP90AB1,LDHA,UBE2C,UBE2D4,UBE2M,UBE2T,UBE2V2
CDP-diacylglycerol Biosynthesis I	1.6	0.25	0	ABHD5,AGPAT4,CDS1,MBOAT2,PNPLA3
Xenobiotic Metabolism PXR Signaling Pathway	1.59	0.13	-1.4	ALDH3A2,ALDH7A1,CAMK2G,CDK2,CDK5,CHST1,GSTA4,GSTM1,GSTM3,GSTO2,GSTZ1,HS3ST4,HS3ST5,HS6ST2,HSP90AA1,HSP90AB1,MAOA,NDST3,PPARGC1A,PPP1CA,PRKACB,PRKAR2B,PRKCA,PRKCE,SULT4A1
Cancer Drug Resistance By Drug Efflux	1.59	0.172	NaN	AKT1,FOXO3,HRAS,MAP2K2,MAPK3,NRAS,PDK1,PIK3R1,PIK3R3,RRAS2
Histidine Degradation III	1.59	0.375	NaN	MTHFD1,MTHFD2,MTHFD2L
Cholecystokinin/Gastrin-mediated Signaling	1.56	0.143	1.5	ATF2,GNAQ,HRAS,MAP2K2,MAPK10,MAPK3,MAPK8,NRAS,PLCB3,PLCB4,PRKCA,PRKCE,RAC3,RHOU,RND2,RRAS2,SST
Phenylalanine Degradation IV (Mammalian, via Side Chain)	1.56	0.286	0	ALDH3A2,GOT2,MAOA,SLC27A2
TR/RXR Activation	1.55	0.155	NaN	AKT1,CAMK4,ENO1,FASN,HIF1A,NCOA2,PIK3R1,PIK3R3,PPARGC1A,SLC16A2,SLC2A1,SREBF2,STRBP
ErbB4 Signaling	1.55	0.164	1.508	AKT1,HRAS,MAP2K2,MAPK3,NRAS,NRG1,PIK3R1,PIK3R3,PRKCA,PRKCE,RRAS2
p70S6K Signaling	1.53	0.14	0.243	AKT1,GNAI1,GNAQ,HRAS,MAP2K2,MAPK3,NRAS,PIK3R1,PIK3R3,PLCB3,PLCB4,PLCD4,PLCL1,PPP2R3A,PRKCA,PRKCE,RRAS2,YWHAH
HGF Signaling	1.53	0.144	1.5	AKT1,ATF2,CCND1,CDK2,CDKN2A,HRAS,MAP2K2,MAPK10,MAPK3,MAPK8,NRAS,PIK3R1,PIK3R3,PRKCA,PRKCE,RRAS2
UVC-Induced MAPK Signaling	1.53	0.176	1	HRAS,MAP2K2,MAPK10,MAPK3,MAPK8,NRAS,PRKCA,PRKCE,RRAS2
Nur77 Signaling in T Lymphocytes	1.51	0.162	-0.302	BCL2,CAMK4,CASP3,CYCS,HDAC2,MAP2K2,MAPK3,PCNA,PDK1,PRKCA,PRKCE
Signaling by Rho Family GTPases	1.5	0.123	2.236	CDC42EP3,CDC42EP4,CDH2,CDH7,CFL1,CIT,DIAPH3,GNAI1,GNAO1,GNAQ,GNAS,GNB2,GNB3,GNG2,GNG3,GNG4,MAP2K2,MAPK10,MAPK3,MAPK8,PAK2,PAK5,PARD6A,PIK3R1,PIK3R3,PKN1,RAC3,RHOU,RND2,WASF1
Endometrial Cancer Signaling	1.49	0.167	1.897	AKT1,CCND1,FOXO3,HRAS,MAP2K2,MAPK3,NRAS,PIK3R1,PIK3R3,RRAS2
Insulin Receptor Signaling	1.48	0.136	2.5	AKT1,CRK,EIF4EBP1,FOXO3,HRAS,INPP5F,MAP2K2,MAPK3,MAPK8,NRAS,PIK3R1,PIK3R3,PPP1CA,PRKACB,PRKAR2B,PTPRF,RRAS2,STXBP4,TSC1
GABA Receptor Signaling	1.47	0.147	NaN	ADCY1,ADCY8,CACNA2D1,CACNA2D3,CACNB3,CACNB4,CACNG1,CACNG2,CACNG4,GABBR2,GABRB3,GNAS,KCNN1,KCNQ2
Glucocorticoid Receptor Signaling	1.44	0.116	NaN	ACTL6B,AKT1,BCL2,CDKN1C,CREBZF,DPF1,FOXO3,GTF2H5,HLTF,HRAS,HSP90AA1,HSP90AB1,HSPA1L,HSPA5,KRT19,KRT33A,MAP2K2,MAPK10,MAPK3,MAPK8,NCOA2,NFAT5,NRAS,PBRM1,PIK3R1,PIK3R3,POLR2J,POLR2L,POU2F2,PRKAB2,PRKACB,RRAS2,SMAD4,SMARCA4,SMARCB1,SMARCC1,TAF10,TAF4,YWHAH
Phosphatidylglycerol Biosynthesis II (Non-plastidic)	1.44	0.227	0	ABHD5,AGPAT4,CDS1,MBOAT2,PNPLA3
Actin Cytoskeleton Signaling	1.43	0.124	0.853	ACTN2,ACTN3,CFL1,CRK,CYFIP2,DIAPH3,FGF17,FGF19,HRAS,MAP2K2,MAPK3,MYH10,MYH3,MYLK2,NCKAP1,NRAS,PAK2,PAK5,PFN2,PIK3R1,PIK3R3,RAC3,RRAS2,TIAM2,TLN2,TRIO,WASF1
Phenylalanine Degradation I (Aerobic)	1.4	0.5	NaN	PCBD1,QDPR
Thrombopoietin Signaling	1.37	0.159	0.632	GAB2,HRAS,MAP2K2,MAPK3,NRAS,PIK3R1,PIK3R3,PRKCA,PRKCE,RRAS2
Glutaryl-CoA Degradation	1.36	0.25	NaN	ACAA2,ACAT2,HSD17B10,HSD17B8
Isoleucine Degradation I	1.36	0.25	NaN	ACAA2,ACAT2,AUH,HSD17B10
Parkinson's Signaling	1.36	0.25	NaN	CASP3,CYCS,MAPK8,SNCAIP
Sphingosine-1-phosphate Signaling	1.35	0.137	-0.258	ADCY1,ADCY8,AKT1,CASP3,GNAI1,GNAQ,MAPK3,PIK3R1,PIK3R3,PLCB3,PLCB4,PLCD4,PLCL1,RAC3,RHOU,RND2
Paxillin Signaling	1.34	0.139	0.832	ACTN2,ACTN3,CRK,HRAS,ITGA2B,ITGAE,MAPK10,MAPK8,NRAS,PAK2,PAK5,PIK3R1,PIK3R3,RRAS2,TLN2
Nitric Oxide Signaling in the Cardiovascular System	1.34	0.141	-0.277	AKT1,ARG2,CAMK4,HSP90AA1,HSP90AB1,MAP2K2,MAPK3,PIK3R1,PIK3R3,PRKACB,PRKAR2B,PRKCA,PRKCE,VEGFB
Apoptosis Signaling	1.34	0.141	-1.069	ACIN1,BCL2,CASP3,CYCS,ENDOG,HRAS,MAP2K2,MAPK3,MAPK8,NRAS,PRKCA,PRKCE,RRAS2,SPTAN1
Integrin Signaling	1.33	0.122	1.706	ACTN2,ACTN3,AKT1,CRK,HRAS,ITGA2B,ITGAE,MAP2K2,MAPK3,MAPK8,MYLK2,NRAS,PAK2,PAK5,PFN2,PIK3R1,PIK3R3,RAC3,RHOU,RND2,RRAS2,TLN2,TSPAN2,TSPAN5,TSPAN6,TSPAN7
Antiproliferative Role of TOB in T Cell Signaling	1.32	0.179	-1.89	CCNA1,CCNA2,CCNE1,CCNE2,CDK2,SKP2,SMAD4
Insulin Secretion Signaling Pathway	1.32	0.119	-0.192	ADCY1,ADCY8,ATF2,CAMK2G,CREB3L4,EIF2S2,EIF4EBP1,GCK,GNAQ,GNAS,KCNB1,MAPK3,PC,PIK3R1,PIK3R3,PLCB3,PLCB4,PLCD4,PLCL1,PRKACB,PRKAR2B,PRKCA,PRKCE,RAPGEF4,RPS6KA5,SEC11C,SLC2A1,SNAP25,SRP68
PI3K/AKT Signaling	1.31	0.126	0.728	AKT1,BCL2,CCND1,EIF4EBP1,FOXO3,GAB2,HRAS,HSP90AA1,HSP90AB1,IL17RD,IL20RB,INPP5F,MAP2K2,MAPK3,MAPK8IP1,NRAS,PIK3R1,PIK3R3,PPP2R3A,RRAS2,TSC1,YWHAH
Cardiac Hypertrophy Signaling (Enhanced)	1.31	0.109	0.832	ACVR2B,ADCY1,ADCY8,AKT1,APEX1,ATF2,CAMK2G,CAMK4,DIAPH3,DLG1,EIF4EBP1,FGF17,FGF19,FGFR2,FZD3,FZD5,GDPD1,GNAI1,GNAQ,GNAS,GNB3,GNG2,HAND2,HDAC2,HRAS,IGF1R,IL17RD,IL20RB,INPP5F,MAP2K2,MAPK10,MAPK3,MAPK8,MPPED2,NFAT5,NRAS,PDE11A,PDK1,PIK3R1,PIK3R3,PKN1,PLCB3,PLCB4,PLCD4,PLCL1,PRKACB,PRKAR2B,PRKCA,PRKCE,RPS6KA5,RRAS2,TG,WNT5B
ErbB2-ErbB3 Signaling	1.29	0.154	1.897	AKT1,CCND1,HRAS,MAP2K2,MAPK3,NRAS,NRG1,PIK3R1,PIK3R3,RRAS2
Glutathione-mediated Detoxification	1.27	0.188	0.816	GGH,GSTA4,GSTM1,GSTM3,GSTO2,GSTZ1
Fatty Acid Œ≤-oxidation I	1.27	0.188	0.816	ACAA2,ACSL3,AUH,HSD17B10,HSD17B8,SLC27A2
SAPK/JNK Signaling	1.25	0.137	1.387	ATF2,CRK,GNB3,GNG2,HRAS,MAP4K3,MAPK10,MAPK8,MAPK8IP1,NRAS,PIK3R1,PIK3R3,RAC3,RRAS2
Coronavirus Pathogenesis Pathway	1.25	0.128	-2.828	BCL2,CASP3,CCND1,CDK2,E2F1,E2F2,E2F3,E2F5,E2F7,E2F8,EEF1A2,KPNB1,MAPK10,MAPK3,MAPK8,RPS27L,SMAD4,SUV39H1,TNPO1
Angiopoietin Signaling	1.24	0.147	1.667	AKT1,BIRC5,CRK,HRAS,NRAS,PAK2,PAK5,PIK3R1,PIK3R3,RASA1,RRAS2
VEGF Family Ligand-Receptor Interactions	1.24	0.143	1.508	AKT1,HRAS,MAP2K2,MAPK3,NRAS,NRP2,PIK3R1,PIK3R3,PRKCA,PRKCE,RRAS2,VEGFB
Cellular Effects of Sildenafil (Viagra)	1.22	0.13	NaN	ADCY1,ADCY8,CACNG1,CACNG2,CACNG4,CAMK4,GNAS,KCNN1,KCNQ2,MYH10,MYH3,PLCB3,PLCB4,PLCD4,PLCL1,PRKACB,PRKAR2B
Serine Biosynthesis	1.2	0.4	NaN	DUSP26,PSAT1
dTMP De Novo Biosynthesis	1.2	0.4	NaN	SHMT2,TYMS
Folate Polyglutamylation	1.2	0.4	NaN	MTHFD1,SHMT2
ILK Signaling	1.2	0.121	1.706	ACTN2,ACTN3,AKT1,ATF2,CASP3,CCND1,CFL1,CREB3L4,HIF1A,MAPK10,MAPK3,MAPK8,MYH10,MYH3,PIK3R1,PIK3R3,PPP2R3A,RAC3,RHOU,RICTOR,RND2,RPS6KA5,VEGFB
Ketogenesis	1.2	0.273	NaN	ACAA2,ACAT2,HMGCS1
FAK Signaling	1.19	0.137	NaN	AKT1,CRK,HMMR,HRAS,MAP2K2,MAPK3,NRAS,PAK2,PAK5,PIK3R1,PIK3R3,RRAS2,TLN2
Role of NFAT in Regulation of the Immune Response	1.18	0.122	1.213	AKT1,ATF2,CAMK4,GNAI1,GNAO1,GNAQ,GNAS,GNB2,GNB3,GNG2,GNG3,GNG4,HRAS,MAP2K2,MAPK3,NFAT5,NRAS,PIK3R1,PIK3R3,PLCB3,PLCB4,RRAS2
PDGF Signaling	1.18	0.14	0.577	CRK,HRAS,INPP5F,MAP2K2,MAPK3,MAPK8,NRAS,PIK3R1,PIK3R3,PRKCA,RASA1,RRAS2
Triacylglycerol Biosynthesis	1.18	0.167	1.633	ABHD5,AGPAT4,DGAT2,ELOVL2,ELOVL6,MBOAT2,PNPLA3
Glycolysis I	1.16	0.192	1.342	ENO1,ENO2,ENO3,PGAM2,PGK1
Gluconeogenesis I	1.16	0.192	1.342	ENO1,ENO2,ENO3,PGAM2,PGK1
IL-7 Signaling Pathway	1.14	0.141	0.333	AKT1,BCL2,CCND1,CDC25A,CDK2,EBF1,FOXO3,MAPK3,PIK3R1,PIK3R3,SLC2A1
Gustation Pathway	1.13	0.123	NaN	ADCY1,ADCY8,APEX1,CACNA2D1,CACNA2D3,CACNB3,CACNB4,CACNG1,CACNG2,CACNG4,GDPD1,GNB3,GNG2,MPPED2,PDE11A,PRKACB,PRKAR2B,TAS2R10,TAS2R14
Tec Kinase Signaling	1.13	0.122	0.302	GNAI1,GNAO1,GNAQ,GNAS,GNB2,GNB3,GNG2,GNG3,GNG4,MAPK10,MAPK8,PAK2,PAK5,PIK3R1,PIK3R3,PRKCA,PRKCE,RAC3,RHOU,RND2
Apelin Muscle Signaling Pathway	1.12	0.211	0	AKT1,GNAS,PPARGC1A,PRKAB2
Ceramide Signaling	1.12	0.136	0.577	AKT1,BCL2,CERK,CYCS,HRAS,MAPK3,MAPK8,NRAS,PIK3R1,PIK3R3,PPP2R3A,RRAS2
IL-3 Signaling	1.11	0.139	0.905	AKT1,GAB2,HRAS,MAP2K2,MAPK3,NRAS,PIK3R1,PIK3R3,PRKCA,PRKCE,RRAS2
IL-2 Signaling	1.11	0.148	1.414	AKT1,HRAS,MAP2K2,MAPK3,MAPK8,NRAS,PIK3R1,PIK3R3,RRAS2
GM-CSF Signaling	1.11	0.143	1.265	AKT1,CAMK2G,CCND1,HRAS,MAP2K2,MAPK3,NRAS,PIK3R1,PIK3R3,RRAS2
Acute Myeloid Leukemia Signaling	1.09	0.135	1.508	AKT1,CCNA1,CCND1,EIF4EBP1,HRAS,MAP2K2,MAPK3,NRAS,PIK3R1,PIK3R3,RRAS2,TCF4
Apelin Pancreas Signaling Pathway	1.09	0.159	0.378	MAPK10,MAPK8,PIK3R1,PIK3R3,PRKAB2,PRKACB,PRKAR2B
IL-17 Signaling	1.08	0.138	NaN	AKT1,ATF2,HRAS,MAP2K2,MAPK10,MAPK3,MAPK8,NRAS,PIK3R1,PIK3R3,RRAS2
JAK/Stat Signaling	1.08	0.138	0.302	AKT1,GNAQ,HRAS,MAP2K2,MAPK3,NRAS,PIAS4,PIK3R1,PIK3R3,RRAS2,SOCS2
Phospholipase C Signaling	1.07	0.113	0.655	ADCY1,ADCY8,ATF2,CAMK4,CREB3L4,GNAQ,GNAS,GNB2,GNB3,GNG2,GNG3,GNG4,HDAC2,HRAS,MAP2K2,MAPK3,NFAT5,NRAS,PLCB3,PLCB4,PLCD4,PLD5,PRKCA,PRKCE,RAC3,RALGDS,RHOU,RND2,RRAS2
Acyl Carrier Protein Metabolism	1.06	1	NaN	AASDHPPT
Glutamate Removal from Folates	1.06	1	NaN	GGH
Sorbitol Degradation I	1.06	1	NaN	SORD
PI3K Signaling in B Lymphocytes	1.06	0.123	0.5	AKT1,ATF1,ATF2,CAMK2G,CAMK4,FOXO3,HRAS,MAP2K2,MAPK3,NFAT5,NRAS,PIK3R1,PLCB3,PLCB4,PLCD4,PLCL1,RRAS2
Cardiomyocyte Differentiation via BMP Receptors	1.05	0.2	NaN	ATF2,BMP7,BMPR1B,SMAD4
NAD Biosynthesis from 2-amino-3-carboxymuconate Semialdehyde	1.05	0.333	NaN	NMNAT2,NMNAT3
Pyruvate Fermentation to Lactate	1.05	0.333	NaN	LDHA,LDHAL6A
Selenocysteine Biosynthesis II (Archaea and Eukaryotes)	1.05	0.333	NaN	PSTK,SEPHS2
Zymosterol Biosynthesis	1.05	0.333	NaN	NSDHL,TM7SF2
Rapoport-Luebering Glycolytic Shunt	1.05	0.333	NaN	MINPP1,PGAM2
NAD Biosynthesis III	1.05	0.333	NaN	NMNAT2,NMNAT3
Role of NANOG in Mammalian Embryonic Stem Cell Pluripotency	1.05	0.126	1.414	AKT1,BMP7,BMPR1B,FZD3,FZD5,HRAS,MAP2K2,MAPK3,NRAS,PIK3R1,PIK3R3,RRAS2,SMAD4,SMAD5,WNT5B
Transcriptional Regulatory Network in Embryonic Stem Cells	1.04	0.148	NaN	H4C1,H4C13,H4C4,H4C6,H4C9,ISL1,L1CAM,MEIS1
mTOR Signaling	1.03	0.115	1.606	AKT1,EIF3M,EIF4EBP1,HIF1A,HRAS,MAPK3,NRAS,PIK3R1,PIK3R3,PLD5,PPP2R3A,PRKAB2,PRKCA,PRKCE,RAC3,RHOU,RICTOR,RND2,RPS27L,RPS6KA5,RPS6KA6,RRAS2,TSC1,VEGFB
Superpathway of Methionine Degradation	1.02	0.162	2.449	AHCY,CBS/CBSL,GOT2,PCCB,PRMT5,SUV39H2
Urate Biosynthesis/Inosine 5'-phosphate Degradation	1.02	0.231	NaN	IMPDH1,IMPDH2,NT5M
RhoGDI Signaling	1.01	0.117	-0.577	ARHGDIA,CDH2,CDH7,CFL1,DLC1,GNAI1,GNAO1,GNAQ,GNAS,GNB2,GNB3,GNG2,GNG3,GNG4,PAK2,PAK5,PRKCA,RAC3,RHOU,RND2,WASF1
Dermatan Sulfate Biosynthesis (Late Stages)	1.01	0.152	-1.89	CHST1,DSEL,HS3ST4,HS3ST5,HS6ST2,NDST3,SULT4A1
FAT10 Cancer Signaling Pathway	1.01	0.152	-0.378	ACVR2B,AKT1,MAD2L1,MAD2L2,PCNA,SMAD4,TCF4
EGF Signaling	1	0.145	0.707	AKT1,HRAS,MAPK3,MAPK8,PIK3R1,PIK3R3,PRKCA,RASA1
Role of p14/p19ARF in Tumor Suppression	0.996	0.172	-0.447	CDKN2A,E2F1,PIK3R1,PIK3R3,POLR3D
Glioma Invasiveness Signaling	0.983	0.135	1	HMMR,HRAS,MAPK3,NRAS,PIK3R1,PIK3R3,RAC3,RHOU,RND2,RRAS2
Docosahexaenoic Acid (DHA) Signaling	0.975	0.158	NaN	AKT1,BCL2,CASP3,CYCS,PIK3R1,PIK3R3
Mouse Embryonic Stem Cell Pluripotency	0.971	0.126	0.832	AKT1,FZD3,FZD5,HRAS,MAP2K2,MAPK3,NRAS,PIK3R1,PIK3R3,RRAS2,SMAD4,SMAD5,TCF4
DNA Double-Strand Break Repair by Homologous Recombination	0.939	0.214	NaN	BRCA2,LIG1,RAD51
HIPPO signaling	0.939	0.129	0	AMOT,DLG1,FAT4,PPP1CA,PPP2R3A,SKP2,SMAD4,SMAD5,TEAD1,WWC1,YWHAH
Pyrimidine Deoxyribonucleotides De Novo Biosynthesis I	0.932	0.182	2	NME4,RRM1,RRM2,TYMS
NAD Salvage Pathway III	0.932	0.286	NaN	NMNAT2,NMNAT3
Stearate Biosynthesis I (Animals)	0.932	0.146	1.89	ACOT7,ACSL3,DHCR24,ELOVL2,ELOVL6,FASN,SLC27A2
Xenobiotic Metabolism Signaling	0.932	0.108	NaN	ALDH3A2,ALDH7A1,CAMK1,CAMK2G,CAMK4,CHST1,GSTA4,GSTM1,GSTM3,GSTO2,GSTZ1,HRAS,HS3ST4,HS3ST5,HS6ST2,HSP90AA1,HSP90AB1,MAOA,MAP2K2,MAPK3,MAPK8,NDST3,NRAS,PIK3R1,PIK3R3,PPARGC1A,PPP2R3A,PRKCA,PRKCE,RRAS2,SULT4A1
Erythropoietin Signaling	0.924	0.132	NaN	AKT1,HRAS,MAP2K2,MAPK3,NRAS,PIK3R1,PIK3R3,PRKCA,PRKCE,RRAS2
STAT3 Pathway	0.914	0.119	0	BCL2,BMPR1B,CDC25A,FGFR2,HRAS,IGF1R,IL17RD,IL20RB,MAP2K2,MAPK10,MAPK3,MAPK8,NRAS,NTRK1,RRAS2,SOCS2
Tryptophan Degradation III (Eukaryotic)	0.879	0.174	NaN	ACAA2,ACAT2,HSD17B10,HSD17B8
Ethanol Degradation IV	0.879	0.174	1	ALDH3A2,ALDH7A1,CYGB,GPX7
Telomerase Signaling	0.876	0.121	0.905	AKT1,E2F1,HDAC2,HRAS,HSP90AA1,HSP90AB1,MAP2K2,MAPK3,NRAS,PIK3R1,PIK3R3,PPP2R3A,RRAS2
Fc Epsilon RI Signaling	0.873	0.12	1.604	AKT1,HRAS,INPP5F,MAP2K2,MAPK10,MAPK3,MAPK8,NRAS,PIK3R1,PIK3R3,PRKCA,PRKCE,RAC3,RRAS2
Role of Tissue Factor in Cancer	0.873	0.12	NaN	AKT1,CASP3,CFL1,GNAQ,HRAS,MAPK3,NRAS,PDXP,PIK3R1,PIK3R3,PRKCA,RPS6KA5,RPS6KA6,RRAS2
Agrin Interactions at Neuromuscular Junction	0.87	0.128	1.265	HRAS,MAPK10,MAPK3,MAPK8,NRAS,NRG1,PAK2,PAK5,RAC3,RRAS2
Dermatan Sulfate Biosynthesis	0.87	0.136	-1.414	B3GAT3,CHST1,DSEL,HS3ST4,HS3ST5,HS6ST2,NDST3,SULT4A1
Xenobiotic Metabolism CAR Signaling Pathway	0.866	0.112	-0.655	ALDH3A2,ALDH7A1,CHST1,GSTA4,GSTM1,GSTM3,GSTO2,GSTZ1,HS3ST4,HS3ST5,HS6ST2,HSP90AA1,HSP90AB1,MAP2K2,MAPK3,NDST3,PPARGC1A,PPP2R3A,PRKCA,PRKCE,SULT4A1
4-1BB Signaling in T Lymphocytes	0.86	0.156	0.447	ATF2,MAP2K2,MAPK10,MAPK3,MAPK8
Myc Mediated Apoptosis Signaling	0.86	0.14	-1.134	BCL2,CASP3,CDKN2A,CRADD,CYCS,PRKACB,PRKAR2B
Amyloid Processing	0.86	0.14	NaN	AKT1,BACE1,CDK5,MAPK3,PRKACB,PRKAR2B,PRKCE
Protein Ubiquitination Pathway	0.839	0.106	NaN	CDC20,CUL2,DNAJB5,DNAJC12,FBXW7,HSP90AA1,HSP90AB1,HSPA1L,HSPA4L,HSPA5,HSPD1,HSPH1,NEDD4L,PSMC3,PSMC5,PSMD2,SACS,SASS6,SKP2,UBE2C,UBE2D4,UBE2M,UBE2T,UBE2V2,USP1,USP38,USP44,USP49,USP5
Hepatic Fibrosis Signaling Pathway	0.839	0.103	2	ACVR2B,AKT1,ATF2,BCL2,CAMK4,CASP3,CCND1,CNR1,CREB3L4,EZH2,FZD3,FZD5,GNAI1,HIF1A,HRAS,IRAK1,MAP2K2,MAPK10,MAPK3,MAPK8,MYLK2,NRAS,PDK1,PIK3R1,PIK3R3,PRKACB,PRKAR2B,PRKCA,PRKCE,RAC3,RHOU,RND2,RRAS2,SMAD4,TCF4,TFRC,VEGFB,WNT5B
Superoxide Radicals Degradation	0.83	0.25	NaN	CYGB,GPX7
IL-22 Signaling	0.827	0.167	0	AKT1,MAPK10,MAPK3,MAPK8
Cysteine Biosynthesis III (mammalia)	0.827	0.167	2	AHCY,CBS/CBSL,PRMT5,SUV39H2
Role of IL-17F in Allergic Inflammatory Airway Diseases	0.821	0.143	1.633	ATF2,CREB3L4,MAP2K2,MAPK3,RPS6KA5,RPS6KA6
Growth Hormone Signaling	0.801	0.127	0	IGF1R,MAPK3,PIK3R1,PIK3R3,PRKCA,PRKCE,RPS6KA5,RPS6KA6,SOCS2
Prolactin Signaling	0.796	0.123	0.632	HRAS,MAP2K2,MAPK3,NRAS,PIK3R1,PIK3R3,PRKCA,PRKCE,RRAS2,SOCS2
D-myo-inositol (1,4,5)-Trisphosphate Biosynthesis	0.78	0.16	1	CDIPT,PLCB3,PLCB4,PLCD4
Lipoate Biosynthesis and Incorporation II	0.78	0.5	NaN	LIAS
Tryptophan Degradation X (Mammalian, via Tryptamine)	0.78	0.16	-1	ALDH3A2,ALDH7A1,DDC,MAOA
All-trans-decaprenyl Diphosphate Biosynthesis	0.78	0.5	NaN	PDSS1
Choline Degradation I	0.78	0.5	NaN	ALDH7A1
S-methyl-5-thio-Œ±-D-ribose 1-phosphate Degradation	0.78	0.5	NaN	APIP
Flavin Biosynthesis IV (Mammalian)	0.78	0.5	NaN	RFK
Palmitate Biosynthesis I (Animals)	0.78	0.5	NaN	FASN
L-glutamine Biosynthesis II (tRNA-dependent)	0.78	0.5	NaN	QRSL1
Fatty Acid Biosynthesis Initiation II	0.78	0.5	NaN	FASN
Cysteine Biosynthesis/Homocysteine Degradation	0.78	0.5	NaN	CBS/CBSL
Putrescine Biosynthesis III	0.78	0.5	NaN	ODC1
Glycine Biosynthesis I	0.78	0.5	NaN	SHMT2
Glutamine Degradation I	0.78	0.5	NaN	GLS
PEDF Signaling	0.772	0.122	1.265	AKT1,BCL2,BDNF,HRAS,MAPK3,NRAS,PIK3R1,PIK3R3,RRAS2,TCF4
Xenobiotic Metabolism General Signaling Pathway	0.762	0.112	1	AKT1,GSTA4,GSTM1,GSTM3,GSTO2,GSTZ1,HRAS,MAP2K2,MAPK3,MAPK8,NRAS,PIK3R1,PIK3R3,PRKCA,PRKCE,RRAS2
Œ≥-linolenate Biosynthesis II (Animals)	0.752	0.176	NaN	ACSL3,FADS1,SLC27A2
Citrulline Biosynthesis	0.747	0.222	NaN	ARG2,GLS
Leucine Degradation I	0.747	0.222	NaN	AUH,MCCC1
Heme Biosynthesis II	0.747	0.222	NaN	FECH,HMBS
Noradrenaline and Adrenaline Degradation	0.742	0.143	0.447	ALDH3A2,ALDH7A1,DHRS2,MAOA,PNMT
Role of IL-17A in Arthritis	0.738	0.13	NaN	ATF2,MAP2K2,MAPK10,MAPK3,MAPK8,PIK3R1,PIK3R3
NAD Salvage Pathway II	0.738	0.154	0	NMNAT2,NMNAT3,NT5M,NUDT12
PKCŒ∏ Signaling in T Lymphocytes	0.733	0.11	0	CACNA2D1,CACNA2D3,CACNB3,CACNB4,CACNG1,CACNG2,CACNG4,CAMK2G,HRAS,MAPK3,MAPK8,NFAT5,NRAS,PIK3R1,PIK3R3,RAC3,RRAS2
FcŒ≥ Receptor-mediated Phagocytosis in Macrophages and Monocytes	0.726	0.117	-0.632	AKT1,CRK,GAB2,MAPK3,PIK3R1,PIK3R3,PLD5,PRKCA,PRKCE,RAC3,TLN2
IL-15 Signaling	0.703	0.12	1.667	AKT1,HRAS,MAP2K2,MAPK3,NRAS,PIK3R1,PIK3R3,RAC3,RRAS2
Xenobiotic Metabolism AHR Signaling Pathway	0.703	0.118	0	ALDH3A2,ALDH7A1,GSTA4,GSTM1,GSTM3,GSTO2,GSTZ1,HSP90AA1,HSP90AB1,NCOA2
Purine Nucleotides Degradation II (Aerobic)	0.699	0.167	NaN	IMPDH1,IMPDH2,NT5M
NRF2-mediated Oxidative Stress Response	0.693	0.106	0.632	AKT1,DNAJA4,DNAJB5,GSTA4,GSTM1,GSTM3,GSTO2,GSTZ1,HACD3,HRAS,MAP2K2,MAPK3,MAPK8,NRAS,PIK3R1,PIK3R3,PRKCA,PRKCE,RRAS2,STIP1
Chondroitin Sulfate Biosynthesis	0.684	0.125	-1.134	B3GAT3,CHST1,HS3ST4,HS3ST5,HS6ST2,NDST3,SULT4A1
Unfolded protein response	0.684	0.125	0.816	BCL2,CEBPG,HSPA1L,HSPA5,HSPH1,MAPK8,SREBF2
Pentose Phosphate Pathway	0.674	0.2	NaN	PGD,TKTL2
Ketolysis	0.674	0.2	NaN	ACAA2,ACAT2
Amyotrophic Lateral Sclerosis Signaling	0.666	0.113	-0.905	BCL2,CASP3,CYCS,GRIA2,GRIK1,GRIK2,HECW1,PIK3R1,PIK3R3,SLC1A2,VEGFB
Sperm Motility	0.664	0.103	0	ABHD3,ALK,CAMK4,CLK1,CNGB1,DYRK4,EPHA5,EPHB3,FGFR2,GNAS,IGF1R,NTRK1,PLCB3,PLCB4,PLCD4,PLCL1,PNPLA3,PRKACB,PRKAR2B,PRKCA,PRKCE,RET,SLC16A10
Regulation of the Epithelial-Mesenchymal Transition Pathway	0.652	0.104	NaN	AKT1,CDH2,FGF17,FGF19,FGFR2,FZD3,FZD5,HIF1A,HRAS,MAP2K2,MAPK3,NRAS,PARD6A,PARD6G,PIK3R1,PIK3R3,RRAS2,SMAD4,TCF4,WNT5B
Heparan Sulfate Biosynthesis	0.636	0.115	-1.667	B3GAT3,CHST1,EXTL2,HS3ST4,HS3ST5,HS6ST2,NDST3,PPME1,SULT4A1
Chondroitin Sulfate Biosynthesis (Late Stages)	0.635	0.125	-1.633	CHST1,HS3ST4,HS3ST5,HS6ST2,NDST3,SULT4A1
Antioxidant Action of Vitamin C	0.635	0.11	-0.333	ABHD3,GSTO2,MAPK10,MAPK3,MAPK8,PLCB3,PLCB4,PLCD4,PLCL1,PLD5,PNPLA3,SLC2A1
Remodeling of Epithelial Adherens Junctions	0.633	0.118	NaN	ACTN2,ACTN3,CBLL1,DNM1L,MAPRE3,TUBA1A,TUBA1C,TUBB
Phagosome Maturation	0.633	0.106	NaN	ATP6V0A2,ATP6V0E2,ATP6V1B2,ATP6V1E1,ATP6V1E2,DYNC1I2,DYNLRB2,DYNLT1,PRDX5,SNAP25,TUBA1A,TUBA1C,TUBB,TUBE1,TUBG2,VPS37C
L-carnitine Biosynthesis	0.623	0.333	NaN	TMLHE
Methylglyoxal Degradation I	0.623	0.333	NaN	GLO1
5-aminoimidazole Ribonucleotide Biosynthesis I	0.623	0.333	NaN	PPAT
D-glucuronate Degradation I	0.623	0.333	NaN	DCXR
Hypusine Biosynthesis	0.623	0.333	NaN	EIF5A
Anandamide Degradation	0.623	0.333	NaN	FAAH
Biotin-carboxyl Carrier Protein Assembly	0.623	0.333	NaN	HLCS
Oxidized GTP and dGTP Detoxification	0.623	0.333	NaN	NUDT1
Glutamate Degradation II	0.623	0.333	NaN	GOT2
Tyrosine Biosynthesis IV	0.623	0.333	NaN	PCBD1
Aspartate Biosynthesis	0.623	0.333	NaN	GOT2
Regulation of IL-2 Expression in Activated and Anergic T Lymphocytes	0.622	0.112	NaN	CAMK4,HRAS,MAP2K2,MAPK10,MAPK3,MAPK8,NFAT5,NRAS,RRAS2,SMAD4
Wnt/Œ≤-catenin Signaling	0.622	0.104	-0.258	ACVR2B,AKT1,APPL2,CCND1,CDH2,CDKN2A,FRAT1,FZD3,FZD5,GNAO1,GNAQ,PPP2R3A,SOX11,SOX12,SOX4,TCF4,TLE4,WNT5B
SPINK1 General Cancer Pathway	0.611	0.116	1.414	AKT1,HRAS,MAP2K2,MAPK3,NRAS,PIK3R1,PIK3R3,RRAS2
Fatty Acid Œ±-oxidation	0.607	0.15	NaN	ALDH3A2,ALDH7A1,TMLHE
B Cell Receptor Signaling	0.604	0.103	0.943	AKT1,ATF2,CAMK2G,CAMK4,CFL1,CREB3L4,EBF1,GAB2,HRAS,INPP5F,MAP2K2,MAPK3,MAPK8,NFAT5,NRAS,PIK3R1,PIK3R3,POU2F2,RRAS2
PCP pathway	0.585	0.117	1.134	ATF2,FZD3,FZD5,MAPK10,MAPK8,PFN2,WNT5B
TNFR1 Signaling	0.582	0.12	-1.633	CASP3,CRADD,CYCS,MAPK8,PAK2,PAK5
RhoA Signaling	0.577	0.106	1.897	ANLN,CDC42EP3,CDC42EP4,CFL1,CIT,DLC1,IGF1R,MYLK2,NRP2,PFN2,PKN1,PLXNA1,WASF1
Heparan Sulfate Biosynthesis (Late Stages)	0.569	0.113	-2.121	CHST1,EXTL2,HS3ST4,HS3ST5,HS6ST2,NDST3,PPME1,SULT4A1
Putrescine Degradation III	0.567	0.143	NaN	ALDH3A2,ALDH7A1,MAOA
Endoplasmic Reticulum Stress Pathway	0.567	0.143	NaN	CASP3,HSPA5,MAPK8
Regulation Of The Epithelial Mesenchymal Transition By Growth Factors Pathway	0.565	0.101	2.668	AKT1,CDH2,DOCK10,FGF17,FGF19,FGFR2,HRAS,MAP2K2,MAPK10,MAPK3,MAPK8,MEST,NRAS,PARD6A,PARD6G,PIK3R1,PIK3R3,RRAS2,SMAD4
Induction of Apoptosis by HIV1	0.562	0.115	0.378	BCL2,CASP3,CYCS,MAPK10,MAPK8,SLC25A10,SLC25A4
NF-Œ∫B Activation by Viruses	0.558	0.11	1	AKT1,HRAS,MAPK3,NRAS,PIK3R1,PIK3R3,PRKCA,PRKCE,RRAS2
Human Embryonic Stem Cell Pluripotency	0.556	0.104	NaN	AKT1,BDNF,BMP7,FGFR2,FZD3,FZD5,GNAS,NTRK1,PIK3R1,PIK3R3,SMAD4,SMAD5,TCF4,WNT5B
Cleavage and Polyadenylation of Pre-mRNA	0.554	0.167	NaN	CPSF1,CPSF3
NAD biosynthesis II (from tryptophan)	0.554	0.167	NaN	NMNAT2,NMNAT3
Polyamine Regulation in Colon Cancer	0.529	0.136	NaN	MXD1,ODC1,TCF4
Pyrimidine Ribonucleotides Interconversion	0.529	0.119	2.236	BLM,NME4,NUDT15,RAD54L,RECQL4
Methionine Degradation I (to Homocysteine)	0.529	0.136	NaN	AHCY,PRMT5,SUV39H2
Iron homeostasis signaling pathway	0.527	0.102	NaN	ATP6V0A2,ATP6V0E2,ATP6V1B2,ATP6V1E1,ATP6V1E2,BMP7,BMPR1B,FECH,HIF1A,MAPK3,SKP2,SMAD4,SMAD5,TFRC
Role of Macrophages, Fibroblasts and Endothelial Cells in Rheumatoid Arthritis	0.526	0.0962	NaN	AKT1,ATF2,C5,CAMK2G,CAMK4,CCND1,CEBPG,CREB3L4,FZD3,FZD5,GNAO1,GNAQ,HRAS,IRAK1,MAP2K2,MAPK3,NFAT5,NRAS,PIK3R1,PIK3R3,PLCB3,PLCB4,PLCD4,PLCL1,PRKCA,PRKCE,RRAS2,TCF4,VEGFB,WNT5B
T Cell Receptor Signaling	0.526	0.105	NaN	CAMK4,HRAS,MAP2K2,MAPK3,MAPK8,NFAT5,NRAS,PIK3R1,PIK3R3,RASA1,RRAS2
Arsenate Detoxification I (Glutaredoxin)	0.517	0.25	NaN	AS3MT
Retinoate Biosynthesis II	0.517	0.25	NaN	RBP1
Pentose Phosphate Pathway (Oxidative Branch)	0.517	0.25	NaN	PGD
Branched-chain Œ±-keto acid Dehydrogenase Complex	0.517	0.25	NaN	BCKDHB
Heme Biosynthesis from Uroporphyrinogen-III I	0.517	0.25	NaN	FECH
Phenylethylamine Degradation I	0.517	0.25	NaN	ALDH3A2
Methylmalonyl Pathway	0.517	0.25	NaN	PCCB
Ascorbate Recycling (Cytosolic)	0.517	0.25	NaN	GSTO2
Melatonin Degradation II	0.517	0.25	NaN	MAOA
Arginine Degradation I (Arginase Pathway)	0.517	0.25	NaN	ARG2
L-cysteine Degradation I	0.517	0.25	NaN	GOT2
CD27 Signaling in Lymphocytes	0.511	0.113	0.816	CASP3,CYCS,MAP2K2,MAPK10,MAPK8,SIVA1
Lymphotoxin Œ≤ Receptor Signaling	0.511	0.113	-0.816	AKT1,CASP3,CYCS,MAPK3,PIK3R1,PIK3R3
Mitochondrial Dysfunction	0.509	0.0994	NaN	ATP5ME,ATP5MG,BACE1,BCL2,CASP3,COX7A2L,COX8A,CYCS,GPX7,HSD17B10,MAOA,MAPK10,MAPK8,NDUFA3,NDUFA4L2,PRDX5,SDHC
Assembly of RNA Polymerase III Complex	0.506	0.154	NaN	BRF2,POLR3D
Fatty Acid Activation	0.506	0.154	NaN	ACSL3,SLC27A2
Oncostatin M Signaling	0.503	0.116	1.342	HRAS,MAP2K2,MAPK3,NRAS,RRAS2
tRNA Splicing	0.503	0.116	1	APEX1,GDPD1,MPPED2,PDE11A,TSEN54
BAG2 Signaling Pathway	0.503	0.116	0.447	CASP3,HSP90AA1,HSPA1L,HSPA5,MAPK3
Role of PI3K/AKT Signaling in the Pathogenesis of Influenza	0.5	0.109	0	AKT1,CRK,GNAI1,MAP2K2,MAPK3,PIK3R1,PIK3R3
IL-17A Signaling in Airway Cells	0.5	0.109	0.378	AKT1,MAP2K2,MAPK10,MAPK3,MAPK8,PIK3R1,PIK3R3
Phospholipases	0.5	0.109	0.816	ABHD3,PLCB3,PLCB4,PLCD4,PLCL1,PLD5,PNPLA3
Virus Entry via Endocytic Pathways	0.495	0.103	NaN	AP1S1,CLTCL1,HRAS,NRAS,PIK3R1,PIK3R3,PRKCA,PRKCE,RAC3,RRAS2,TFRC
PXR/RXR Activation	0.481	0.108	NaN	AKT1,ALDH3A2,FOXO3,GSTM1,PPARGC1A,PRKACB,PRKAR2B
CD40 Signaling	0.481	0.108	0.378	ATF1,MAP2K2,MAPK10,MAPK3,MAPK8,PIK3R1,PIK3R3
Pyrimidine Ribonucleotides De Novo Biosynthesis	0.48	0.114	2.236	BLM,NME4,NUDT15,RAD54L,RECQL4
GŒ±12/13 Signaling	0.476	0.1	0.832	AKT1,CDH2,CDH7,HRAS,MAP2K2,MAPK10,MAPK3,MAPK8,NRAS,PIK3R1,PIK3R3,RASA1,RRAS2
Macropinocytosis Signaling	0.475	0.105	0.707	ANKFY1,HRAS,NRAS,PIK3R1,PIK3R3,PRKCA,PRKCE,RRAS2
Inhibition of Angiogenesis by TSP1	0.47	0.118	0	AKT1,CASP3,MAPK10,MAPK8
Tumoricidal Function of Hepatic Natural Killer Cells	0.462	0.125	NaN	CASP3,CYCS,ENDOG
Glutathione Redox Reactions I	0.462	0.125	NaN	GPX7,GSTM1,GSTZ1
Vitamin-C Transport	0.462	0.125	NaN	GSTO2,LRRC8B,SLC2A1
Nucleotide Excision Repair Pathway	0.445	0.114	NaN	GTF2H5,POLR2J,POLR2L,RPA3
Creatine-phosphate Biosynthesis	0.439	0.2	NaN	CKB
Tetrapyrrole Biosynthesis II	0.439	0.2	NaN	HMBS
CMP-N-acetylneuraminate Biosynthesis I (Eukaryotes)	0.439	0.2	NaN	NANS
Myo-inositol Biosynthesis	0.439	0.2	NaN	INPP5F
2-oxobutanoate Degradation I	0.439	0.2	NaN	PCCB
Trans, trans-farnesyl Diphosphate Biosynthesis	0.439	0.2	NaN	IDI1
Galactose Degradation I (Leloir Pathway)	0.439	0.2	NaN	GALK1
Tyrosine Degradation I	0.439	0.2	NaN	GSTZ1
IL-17A Signaling in Gastric Cells	0.433	0.12	NaN	MAPK10,MAPK3,MAPK8
Role of JAK family kinases in IL-6-type Cytokine Signaling	0.433	0.12	NaN	MAPK10,MAPK3,MAPK8
Superpathway of Citrulline Metabolism	0.424	0.133	NaN	ARG2,GLS
Tight Junction Signaling	0.419	0.0952	NaN	AFDN,AKT1,CLDN10,CPSF1,CPSF3,MAGI2,MYH10,MYH3,NECTIN1,NECTIN3,PARD6A,PPP2R3A,PRKACB,PRKAR2B,SNAP25,SPTAN1
LPS/IL-1 Mediated Inhibition of RXR Function	0.417	0.0938	0	ACSL3,ALDH3A2,ALDH7A1,CHST1,GSTA4,GSTM1,GSTM3,GSTO2,GSTZ1,HMGCS1,HS3ST4,HS3ST5,HS6ST2,IRAK1,MAOA,MAPK8,NDST3,PPARGC1A,SLC27A2,SLCO1A2,SULT4A1
Ephrin A Signaling	0.416	0.106	NaN	CFL1,EFNA3,EPHA5,PIK3R1,PIK3R3
Triacylglycerol Degradation	0.416	0.106	0.447	ABHD12,FAAH,NDST3,PNPLA3,PPME1
Androgen Biosynthesis	0.388	0.125	NaN	EBP,SRD5A1
HOTAIR Regulatory Pathway	0.385	0.0938	1.069	AKT1,ATXN1,DNMT3B,EZH2,FOXM1,H3-4,HDAC2,JARID2,MMP15,MMP16,PIK3R1,PIK3R3,RBBP4,TCF4,WNT5B
Urea Cycle	0.378	0.167	NaN	ARG2
Serotonin and Melatonin Biosynthesis	0.378	0.167	NaN	DDC
Arginine Degradation VI (Arginase 2 Pathway)	0.378	0.167	NaN	ARG2
Pentose Phosphate Pathway (Non-oxidative Branch)	0.378	0.167	NaN	TKTL2
Regulation of Actin-based Motility by Rho	0.371	0.0957	1.414	ARHGDIA,CFL1,PAK2,PAK5,PFN2,RAC3,RHOU,RND2,WASF1
Actin Nucleation by ARP-WASP Complex	0.365	0.0972	1.633	HRAS,NRAS,RAC3,RHOU,RND2,RRAS2,WASF1
Role of PKR in Interferon Induction and Antiviral Response	0.364	0.094	-0.302	ATF2,CASP3,CYCS,E2F1,HSP90AA1,HSP90AB1,HSPA1L,HSPA5,MAPK10,MAPK3,MAPK8
Assembly of RNA Polymerase II Complex	0.36	0.1	NaN	GTF2H5,POLR2J,POLR2L,TAF10,TAF4
Mitochondrial L-carnitine Shuttle Pathway	0.358	0.118	NaN	ACSL3,SLC27A2
Histamine Degradation	0.358	0.118	NaN	ALDH3A2,ALDH7A1
IL-4 Signaling	0.341	0.0941	NaN	AKT1,HRAS,INPP5F,NFAT5,NRAS,PIK3R1,PIK3R3,RRAS2
Sonic Hedgehog Signaling	0.333	0.103	NaN	CCNB1,PRKACB,PRKAR2B
Trehalose Degradation II (Trehalase)	0.329	0.143	NaN	GCK
D-myo-inositol (1,3,4)-trisphosphate Biosynthesis	0.329	0.111	NaN	INPP5F,MINPP1
Glycogen Biosynthesis II (from UDP-D-Glucose)	0.329	0.143	NaN	GYG2
Glycoaminoglycan-protein Linkage Region Biosynthesis	0.329	0.143	NaN	B3GAT3
Aspartate Degradation II	0.329	0.143	NaN	GOT2
Dopamine Degradation	0.312	0.1	NaN	ALDH3A2,ALDH7A1,MAOA
Phototransduction Pathway	0.311	0.0943	NaN	CNGB1,GNB3,GNGT1,PRKACB,PRKAR2B
Inhibition of ARE-Mediated mRNA Degradation Pathway	0.311	0.0902	-1.508	AKT1,CNOT6,EXOSC3,EXOSC5,MAPK3,MAPK6,PPP2R3A,PRKACB,PRKAR2B,TIA1,YWHAH
RANK Signaling in Osteoclasts	0.305	0.0909	0	AKT1,CAMK4,MAP2K2,MAPK10,MAPK3,MAPK8,PIK3R1,PIK3R3
Valine Degradation I	0.303	0.105	NaN	AUH,BCKDHB
Oxidative Ethanol Degradation III	0.303	0.105	NaN	ALDH3A2,ALDH7A1
Salvage Pathways of Pyrimidine Deoxyribonucleotides	0.288	0.125	NaN	TK1
Phagosome Formation	0.282	0.088	NaN	PIK3R1,PIK3R3,PLCB3,PLCB4,PLCD4,PLCL1,PRKCA,PRKCE,RAC3,RHOU,RND2
The Visual Cycle	0.279	0.1	NaN	RBP1,RDH5
Serotonin Degradation	0.278	0.0896	0.816	ALDH3A2,ALDH7A1,B3GAT3,DHRS2,LARGE1,MAOA
Ethanol Degradation II	0.275	0.0938	NaN	ALDH3A2,ALDH7A1,DHRS2
IL-23 Signaling Pathway	0.272	0.0909	1	AKT1,HIF1A,PIK3R1,PIK3R3
Circadian Rhythm Signaling	0.257	0.0909	NaN	ATF2,CREB3L4,CRY1
IL-9 Signaling	0.257	0.0909	NaN	PIK3R1,PIK3R3,SOCS2
Role of JAK1 and JAK3 in Œ≥c Cytokine Signaling	0.254	0.087	NaN	HRAS,MAPK3,NRAS,PIK3R1,PIK3R3,RRAS2
Sucrose Degradation V (Mammalian)	0.254	0.111	NaN	KHK
Phosphatidylethanolamine Biosynthesis II	0.254	0.111	NaN	ETNK2
Role of Oct4 in Mammalian Embryonic Stem Cell Pluripotency	0.243	0.087	NaN	BMI1,IGF2BP1,JARID2,NR2F6
Cytotoxic T Lymphocyte-mediated Apoptosis of Target Cells	0.242	0.0882	NaN	BCL2,CASP3,CYCS
Embryonic Stem Cell Differentiation into Cardiac Lineages	0.225	0.1	NaN	ISL1
Calcium Transport I	0.225	0.1	NaN	ATP2B1
Glycine Betaine Degradation	0.225	0.1	NaN	SHMT2
Superpathway of D-myo-inositol (1,4,5)-trisphosphate Metabolism	0.22	0.087	NaN	INPP5F,MINPP1
Apelin Cardiac Fibroblast Signaling Pathway	0.22	0.087	NaN	AKT1,PRKAB2
GDP-glucose Biosynthesis	0.201	0.0909	NaN	GCK
Natural Killer Cell Signaling	0	0.0761	0.775	AKT1,CFL1,HRAS,HSPA1L,HSPA5,MAP2K2,MAPK3,NFAT5,NRAS,PAK2,PAK5,PIK3R1,PIK3R3,RAC3,RRAS2
IL-10 Signaling	0	0.029	NaN	ARG2,MAPK8
Leukocyte Extravasation Signaling	0	0.0863	-0.5	ACTN2,ACTN3,AFDN,CLDN10,CRK,DLC1,GNAI1,MAP2K2,MAPK10,MAPK8,MMP15,MMP16,PIK3R1,PIK3R3,PRKCA,PRKCE,RAPGEF4
Coagulation System	0	0.0571	NaN	BDKRB1,F12
Acute Phase Response Signaling	0	0.0782	1.155	AKT1,C5,HRAS,IRAK1,MAP2K2,MAPK3,MAPK8,NRAS,PIK3R1,PIK3R3,RBP1,RRAS2,SOCS2,TCF4
Hepatic Cholestasis	0	0.0703	NaN	ADCY1,ADCY8,FGF19,IRAK1,MAPK10,MAPK8,PRKACB,PRKAR2B,PRKCA,PRKCE,SLC4A2,SLCO1A2,SLCO3A1
LXR/RXR Activation	0	0.0496	NaN	ABCG4,APOM,ARG2,FASN,FDFT1,HMGCR
Hepatic Fibrosis / Hepatic Stellate Cell Activation	0	0.0484	NaN	BCL2,COL9A1,COL9A2,FGFR2,IGF1R,MYH10,MYH3,SMAD4,VEGFB
VDR/RXR Activation	0	0.0641	NaN	MXD1,NCOA2,PRKCA,PRKCE,PSMC5
FXR/RXR Activation	0	0.0714	NaN	AKT1,APOM,FASN,FGF19,MAPK10,MAPK8,PPARGC1A,SLC4A2,VLDLR
Activation of IRF by Cytosolic Pattern Recognition Receptors	0	0.0476	NaN	ATF2,MAPK10,MAPK8
Caveolar-mediated Endocytosis Signaling	0	0.0411	NaN	ITGA2B,ITGAE,PRKCA
Clathrin-mediated Endocytosis Signaling	0	0.0725	NaN	AP1S1,APOM,CLTCL1,DNM1L,FGF17,FGF19,PIK3R1,PIK3R3,SH3GL2,SH3GL3,SH3GLB2,SNAP91,TFRC,VEGFB
IL-12 Signaling and Production in Macrophages	0	0.0833	NaN	AKT1,APOM,JMJD6,MAP2K2,MAPK10,MAPK3,MAPK8,PIK3R1,PIK3R3,PRKCA,PRKCE
Role of Pattern Recognition Receptors in Recognition of Bacteria and Viruses	0	0.0519	0	C5,MAPK10,MAPK3,MAPK8,PIK3R1,PIK3R3,PRKCA,PRKCE
TREM1 Signaling	0	0.04	NaN	AKT1,IRAK1,MAPK3
MIF Regulation of Innate Immunity	0	0.0714	NaN	MAPK10,MAPK3,MAPK8
Calcium-induced T Lymphocyte Apoptosis	0	0.0606	NaN	CAMK4,HDAC2,PRKCA,PRKCE
Airway Pathology in Chronic Obstructive Pulmonary Disease	0	0.0254	NaN	APOM,FGF17,FGF19
CTLA4 Signaling in Cytotoxic T Lymphocytes	0	0.0674	NaN	AKT1,AP1S1,CLTCL1,PIK3R1,PIK3R3,PPP2R3A
B Cell Activating Factor Signaling	0	0.0732	NaN	MAPK10,MAPK8,NFAT5
IL-15 Production	0	0.0744	-0.333	ALK,CLK1,DYRK4,EPHA5,EPHB3,FGFR2,IGF1R,NTRK1,RET
T Helper Cell Differentiation	0	0.0137	NaN	GATA3
CD28 Signaling in T Helper Cells	0	0.0667	0	AKT1,CAMK4,MAP2K2,MAPK10,MAPK8,NFAT5,PIK3R1,PIK3R3
Dendritic Cell Maturation	0	0.071	0.832	AKT1,ATF2,CREB3L4,FSCN1,MAPK10,MAPK3,MAPK8,PIK3R1,PIK3R3,PLCB3,PLCB4,PLCD4,PLCL1
iCOS-iCOSL Signaling in T Helper Cells	0	0.0631	-1.134	AKT1,CAMK2G,CAMK4,GAB2,NFAT5,PIK3R1,PIK3R3
HMGB1 Signaling	0	0.0788	1.155	AKT1,HRAS,MAP2K2,MAPK10,MAPK3,MAPK8,NRAS,PIK3R1,PIK3R3,RAC3,RHOU,RND2,RRAS2
Maturity Onset Diabetes of Young (MODY) Signaling	0	0.0508	NaN	APOM,GCK,NKX6-1
Type I Diabetes Mellitus Signaling	0	0.0811	-0.378	BCL2,CASP3,CYCS,HSPD1,ICA1,IRAK1,MAPK10,MAPK8,SOCS2
Basal Cell Carcinoma Signaling	0	0.0694	0	BMP7,FZD3,FZD5,TCF4,WNT5B
Primary Immunodeficiency Signaling	0	0.04	NaN	RFXAP,UNG
Autoimmune Thyroid Disease Signaling	0	0.0204	NaN	TG
Production of Nitric Oxide and Reactive Oxygen Species in Macrophages	0	0.0798	-0.535	AKT1,APOM,ARG2,MAPK10,MAPK3,MAPK8,PIK3R1,PIK3R3,PPP1CA,PPP2R3A,PRKCA,PRKCE,RAC3,RHOU,RND2
Crosstalk between Dendritic Cells and Natural Killer Cells	0	0.0337	NaN	CAMK2G,FSCN1,TLN2
Systemic Lupus Erythematosus Signaling	0	0.0742	NaN	AKT1,C5,CAMK4,HRAS,KLK1,LSM11,LSM4,LSM5,MAPK3,NFAT5,NRAS,PIK3R1,PIK3R3,PRPF19,RRAS2,SNRPB,ZCRB1
Cdc42 Signaling	0	0.0599	1.134	ATF2,CFL1,DIAPH3,EXOC4,FNBP1L,MAPK10,MAPK8,PAK2,PARD6A,RASA1
EIF2 Signaling	0	0.0807	1.291	AKT1,BCL2,CCND1,EIF2S2,EIF3M,HRAS,HSPA5,IGF1R,MAP2K2,MAPK3,NKX6-2,NRAS,PIK3R1,PIK3R3,PPP1CA,RPL39L,RPS27L,RRAS2
April Mediated Signaling	0	0.0769	NaN	MAPK10,MAPK8,NFAT5
Retinoic acid Mediated Apoptosis Signaling	0	0.0333	NaN	CASP3,CYCS
Role of Osteoblasts, Osteoclasts and Chondrocytes in Rheumatoid Arthritis	0	0.0727	NaN	AKT1,BCL2,BMP7,CAMK4,FZD3,FZD5,MAPK10,MAPK3,MAPK8,NFAT5,PIK3R1,PIK3R3,SMAD4,SMAD5,TCF4,WNT5B
Atherosclerosis Signaling	0	0.0236	NaN	ABHD3,APOM,PNPLA3
Regulation of eIF4 and p70S6K Signaling	0	0.0833	1	AKT1,EIF2S2,EIF3M,EIF4EBP1,HRAS,MAP2K2,MAPK3,NRAS,PIK3R1,PIK3R3,PPP2R3A,RPS27L,RRAS2
Neuroprotective Role of THOP1 in Alzheimer's Disease	0	0.0776	1.633	ECE2,GNRH1,HGFAC,KLK1,NTS,PRKACB,PRKAR2B,PRSS27,SST
Role of Wnt/GSK-3Œ≤ Signaling in the Pathogenesis of Influenza	0	0.0641	NaN	FZD3,FZD5,NCOA2,TCF4,WNT5B
TWEAK Signaling	0	0.0571	NaN	CASP3,CYCS
TNFR2 Signaling	0	0.0333	NaN	MAPK8
MSP-RON Signaling Pathway	0	0.069	NaN	F12,KLK1,PIK3R1,PIK3R3
OX40 Signaling Pathway	0	0.0333	NaN	BCL2,MAPK10,MAPK8
Extrinsic Prothrombin Activation Pathway	0	0.0625	NaN	F12
MIF-mediated Glucocorticoid Regulation	0	0.0294	NaN	MAPK3
Intrinsic Prothrombin Activation Pathway	0	0.0476	NaN	F12,KLK1
DNA Double-Strand Break Repair by Non-Homologous End Joining	0	0.0714	NaN	LIG4
Assembly of RNA Polymerase I Complex	0	0.0833	NaN	TAF1B
Spliceosomal Cycle	0	0.0625	NaN	MAGOH,PRPF19,SF3B3
IL-17A Signaling in Fibroblasts	0	0.0286	NaN	MAPK3
Role of JAK2 in Hormone-like Cytokine Signaling	0	0.0588	NaN	HLTF,SOCS2
iNOS Signaling	0	0.0444	NaN	CAMK4,IRAK1
nNOS Signaling in Neurons	0	0.0638	NaN	CAMK4,PRKCA,PRKCE
Retinoate Biosynthesis I	0	0.0588	NaN	RBP1,RDH5
Glucose and Glucose-1-phosphate Degradation	0	0.0833	NaN	GCK
Thyroid Hormone Metabolism II (via Conjugation and/or Degradation)	0	0.0526	NaN	B3GAT3,LARGE1
Nicotine Degradation III	0	0.0351	NaN	B3GAT3,LARGE1
Acyl-CoA Hydrolysis	0	0.0769	NaN	ACOT7
Melatonin Degradation I	0	0.0333	NaN	B3GAT3,LARGE1
Choline Biosynthesis III	0	0.0667	NaN	PLD5
Estrogen Biosynthesis	0	0.0732	NaN	HSD17B10,HSD17B11,HSD17B8
Oleate Biosynthesis II (Animals)	0	0.0769	NaN	FADS1
Glycogen Degradation III	0	0.0714	NaN	PYGB
1D-myo-inositol Hexakisphosphate Biosynthesis II (Mammalian)	0	0.0556	NaN	INPP5F
tRNA Charging	0	0.0769	NaN	DARS2,NARS2,YARS1
Glycogen Degradation II	0	0.0833	NaN	PYGB
Nicotine Degradation II	0	0.0308	NaN	B3GAT3,LARGE1
TCA Cycle II (Eukaryotic)	0	0.0417	NaN	SDHC
D-myo-inositol (1,4,5)-trisphosphate Degradation	0	0.0588	NaN	INPP5F
Retinol Biosynthesis	0	0.0476	NaN	PNPLA3,RBP1
Colanic Acid Building Blocks Biosynthesis	0	0.0714	NaN	GALK1
Guanosine Nucleotides Degradation III	0	0.0833	NaN	NT5M
Adenosine Nucleotides Degradation II	0	0.0667	NaN	NT5M
Superpathway of Melatonin Degradation	0	0.0462	NaN	B3GAT3,LARGE1,MAOA
Glucocorticoid Biosynthesis	0	0.0769	NaN	EBP
Mineralocorticoid Biosynthesis	0	0.0833	NaN	EBP
UDP-N-acetyl-D-galactosamine Biosynthesis II	0	0.0769	NaN	GCK
Inhibition of Matrix Metalloproteases	0	0.0513	NaN	MMP15,MMP16
Agranulocyte Adhesion and Diapedesis	0	0.0415	NaN	C5,CLDN10,GNAI1,MMP15,MMP16,MYH10,MYH3,PODXL2
Granulocyte Adhesion and Diapedesis	0	0.0278	NaN	C5,CLDN10,GNAI1,MMP15,MMP16
Oxidative Phosphorylation	0	0.0642	1.134	ATP5ME,ATP5MG,COX7A2L,COX8A,CYCS,NDUFA3,SDHC
Toll-like Receptor Signaling	0	0.0263	NaN	IRAK1,MAPK8
Interferon Signaling	0	0.0278	NaN	BCL2
Death Receptor Signaling	0	0.0769	-1.134	ACIN1,BCL2,CASP3,CRADD,CYCS,MAPK8,SPTAN1
PPAR Signaling	0	0.0769	-1.414	HRAS,HSP90AA1,HSP90AB1,MAP2K2,MAPK3,NRAS,PPARGC1A,RRAS2
p38 MAPK Signaling	0	0.0678	2.449	ATF1,ATF2,CDC25B,CREB3L4,H3-4,IRAK1,RPS6KA5,RPS6KA6
Notch Signaling	0	0.0541	NaN	CNTN1,DLL3
NF-Œ∫B Signaling	0	0.0782	0.535	AKT1,BMPR1B,FGFR2,HDAC2,HRAS,IGF1R,IRAK1,MAPK8,NRAS,NTRK1,PIK3R1,PIK3R3,PRKACB,RRAS2
IL-6 Signaling	0	0.08	1.265	AKT1,HRAS,MAP2K2,MAPK10,MAPK3,MAPK8,NRAS,PIK3R1,PIK3R3,RRAS2
Autophagy	0	0.0164	NaN	BCL2
PD-1, PD-L1 cancer immunotherapy pathway	0	0.0566	-0.816	AKT1,CDK2,CIP2A,PIK3R1,PIK3R3,SKP2
Th1 and Th2 Activation Pathway	0	0.0234	NaN	ACVR2B,GATA3,PIK3R1,PIK3R3
Th1 Pathway	0	0.0248	NaN	GATA3,PIK3R1,PIK3R3
Th2 Pathway	0	0.0294	0	ACVR2B,GATA3,PIK3R1,PIK3R3
Osteoarthritis Pathway	0	0.0616	0.277	ATF2,CASP3,CREB3L4,FOXO3,FZD3,FZD5,HIF1A,PPARGC1A,PRKAB2,SMAD4,SMAD5,TCF4,VEGFB
GP6 Signaling Pathway	0	0.0756	1	AKT1,CAMK4,COL9A1,COL9A2,ITGA2B,PIK3R1,PIK3R3,PRKCA,PRKCE
Neuroinflammation Signaling Pathway	0	0.0803	1.789	ACVR2B,AKT1,ATF2,BACE1,BCL2,BDNF,BIRC5,CASP3,CREB3L4,GABBR2,GABRB3,GLS,IRAK1,KCNJ6,KCNJ9,KLK1,MAPK10,MAPK3,MAPK6,MAPK8,NFAT5,PIK3R1,PIK3R3,SLC1A2
Th17 Activation Pathway	0	0.0549	0.447	HIF1A,HSP90AA1,HSP90AB1,IRAK1,NFAT5
SPINK1 Pancreatic Cancer Pathway	0	0.0167	NaN	KLK1
Apelin Liver Signaling Pathway	0	0.0769	NaN	MAPK10,MAPK8
T Cell Exhaustion Signaling Pathway	0	0.0743	-0.378	ACVR2B,AKT1,HRAS,MAPK10,MAPK3,MAPK8,NFAT5,NRAS,PDK1,PIK3R1,PIK3R3,PPP2R3A,RRAS2
Systemic Lupus Erythematosus In T Cell Signaling Pathway	0	0.0569	-0.688	AKT1,ATF2,CAMK4,CASP3,CREB3L4,DNMT1,GNAI1,HRAS,MAP2K2,MAPK3,NRAS,PDK1,PIK3R1,PIK3R3,PPP2R3A,RAC3,RHOU,RND2,RRAS2
Systemic Lupus Erythematosus In B Cell Signaling Pathway	0	0.0727	1.342	AKT1,BCL2,CAMK4,CCND1,FOXO3,HRAS,INPP5F,IRAK1,MAP2K2,MAPK3,NFAT5,NRAS,PIK3R1,PIK3R3,PRKCA,PRKCE,RAC3,RRAS2,SHC3,SHF
Necroptosis Signaling Pathway	0	0.0382	-0.816	CAMK2G,DAPK1,DNM1L,SLC25A10,SLC25A4,TIMM10
Regulation Of The Epithelial Mesenchymal Transition In Development Pathway	0	0.0595	1	FZD3,FZD5,HIF1A,TCF4,WNT5B
Complement System	0	0.027	NaN	C5
Eicosanoid Signaling	0	0.0455	NaN	ABHD3,PNPLA3,PTGER3

## Sheet: Canonical pathway-blue
¬© 2000-2020 QIAGEN. All rights reserved.
Ingenuity Canonical Pathways	-log(p-value)	Ratio	z-score	Molecules
Hepatic Fibrosis / Hepatic Stellate Cell Activation	42.5	0.355	NaN	A2M,ACTA2,AGT,AGTR1,BAMBI,CCL2,CCN2,COL10A1,COL11A1,COL12A1,COL15A1,COL16A1,COL18A1,COL1A1,COL1A2,COL20A1,COL21A1,COL27A1,COL2A1,COL3A1,COL4A1,COL4A2,COL5A1,COL5A2,COL5A3,COL6A3,COL7A1,COL8A1,COL9A3,CXCL3,CYP2E1,EDN1,EDNRA,EDNRB,EGFR,FGFR1,FLT1,FN1,HGF,IGF1,IGFBP3,IGFBP4,IGFBP5,IL1R1,IL1RAPL1,IL6,KDR,KLF6,MYH11,MYH9,MYL9,NGFR,PDGFB,PDGFC,PDGFD,PDGFRB,PGF,SERPINE1,SMAD7,TGFB2,TGFB3,TIMP1,TNFRSF1A,…
Hepatic Fibrosis Signaling Pathway	25.2	0.188	7.318	ACTA2,ACVR1,AGT,AGTR1,BAMBI,CCL2,CCN2,CEBPB,COL10A1,COL18A1,COL1A1,COL1A2,COL2A1,COL3A1,COL5A3,EDN1,EDNRA,FGFR1,FLT1,FOS,FZD1,FZD2,FZD4,FZD7,GLI1,GLI2,GLI3,IL1R1,IL1RAPL1,ITGA2,ITGA3,ITGA5,ITGB3,JUN,KDR,KLF9,MYL9,MYLK,NGFR,NOX4,PDGFB,PDGFC,PDGFD,PDGFRB,PGF,PPARG,PRKD1,PRKD3,RASD1,RHOB,RHOBTB1,RHOJ,RRAS,SERPINE1,SMAD7,SMO,SNAI1,TCF7L1,TF,TGFB2,TGFB3,TGFBR3,TIMP1,TNFRSF1A,VEGFA,VEGFC,VEGFD,WNT11,YA…
Osteoarthritis Pathway	23.1	0.237	3.904	ACVRL1,ADAMTS4,ADAMTS5,ANXA2,ANXA5,CCN4,CEBPB,COL10A1,COL2A1,CTNNA1,DCN,DDIT4,FGFR1,FN1,FRZB,FZD1,FZD2,FZD4,FZD7,GLI1,GLI2,GLI3,HES1,HTRA1,IL1R1,IL1RAPL1,ITGA2,ITGA3,ITGA5,JAG1,MATN3,MEF2C,NOTCH1,P2RX7,PDGFC,PGF,PPARG,PTGS2,RARRES2,RBP4,SMAD7,SMO,SOX9,SPHK1,TCF7L1,TIMP3,TNFRSF1A,VEGFA,VEGFC,VEGFD
GP6 Signaling Pathway	15.8	0.261	5.568	COL10A1,COL11A1,COL12A1,COL15A1,COL16A1,COL18A1,COL1A1,COL1A2,COL20A1,COL21A1,COL27A1,COL2A1,COL3A1,COL4A1,COL4A2,COL5A1,COL5A2,COL5A3,COL6A3,COL7A1,COL8A1,COL9A3,ITGB3,LAMA2,LAMA4,LAMB1,LAMB2,LAMC1,LAMC3,PRKD1,PRKD3
Axonal Guidance Signaling	12.6	0.122	NaN	ADAM15,ADAM23,ADAMTS1,ADAMTS3,ADAMTS4,ADAMTS5,ADAMTS8,ADAMTS9,BMP4,BMP6,BMP8A,DOCK1,EFNA1,EFNB1,EPHA2,EPHA3,EPHB4,FZD1,FZD2,FZD4,FZD7,GLI1,GLI2,GLI3,GNG11,GNG12,IGF1,ITGA2,ITGA3,ITGA5,MMP11,MYL9,NGEF,NGFR,NTF3,NTN4,PAPPA,PDGFB,PDGFC,PDGFD,PGF,PLCE1,PLXND1,PRKD1,PRKD3,RASD1,RRAS,SDC2,SEMA3B,SEMA3C,SEMA3G,SEMA5A,SMO,TUBB6,UNC5B,VEGFA,VEGFC,VEGFD,WNT11
Role of Macrophages, Fibroblasts and Endothelial Cells in Rheumatoid Arthritis	11.1	0.138	NaN	ADAMTS4,CCL2,CEBPB,CEBPD,CEBPE,DKK3,F2RL1,FN1,FOS,FRZB,FZD1,FZD2,FZD4,FZD7,IL17RC,IL1R1,IL1RAPL1,IL6,JUN,LTBR,NGFR,OSM,PDGFB,PDGFC,PDGFD,PGF,PLCE1,PRKD1,PRKD3,RASD1,RRAS,SELE,SFRP2,SFRP4,SMO,SOCS3,TCF7L1,TLR3,TNFRSF1A,VEGFA,VEGFC,VEGFD,WNT11
ILK Signaling	10.7	0.168	4.271	ACTA2,ACTG2,CDH1,DOCK1,FLNB,FN1,FOS,ITGB3,ITGB4,ITGB5,ITGB8,JUN,KRT18,LIMS2,MYH11,MYH9,MYL9,PDGFC,PGF,PTGS2,RHOB,RHOBTB1,RHOJ,SNAI1,SNAI2,TGFB1I1,TNFRSF1A,VCL,VEGFA,VEGFC,VEGFD,VIM
Acute Phase Response Signaling	10	0.168	4.025	A2M,AGT,C1R,C1S,C3,CEBPB,CFB,CP,FN1,FOS,IL1R1,IL6,ITIH4,JUN,MAP3K5,NGFR,OSM,OSMR,RASD1,RBP4,RBP7,RRAS,SERPINA3,SERPINE1,SERPINF1,SERPING1,SOCS3,TF,TNFRSF1A,VWF
Cardiac Hypertrophy Signaling (Enhanced)	9.54	0.109	6.934	ACVR1,ADCY4,ADRA2B,AGT,AGTR1,EDN1,EDNRA,EDNRB,FGFR1,FZD1,FZD2,FZD4,FZD7,GHR,GNG11,HSPB1,HSPB2,HSPB3,HSPB7,IGF1,IL17RC,IL1R1,IL6,ITGA2,ITGA3,ITGA5,ITPR3,JUN,MAP3K5,MAP3K6,MAP3K8,MEF2C,NGFR,NPR1,OSM,PDE1A,PDE1C,PDE8A,PDE8B,PLCE1,PLN,PRKD1,PRKD3,PRKG1,PTGS2,RASD1,RRAS,SMO,TGFB2,TGFB3,TGFBR3,TNFRSF1A,WNT11
LXR/RXR Activation	8.93	0.19	1.091	AGT,APOC2,APOD,C3,CCL2,CD36,IL1R1,IL1RAPL1,IL6,ITIH4,LCAT,LDLR,LPL,NGFR,PLTP,PON3,PTGS2,RBP4,SERPINF1,SREBF1,TF,TLR3,TNFRSF1A
Apelin Liver Signaling Pathway	8.52	0.423	2.714	AGT,APLN,COL10A1,COL18A1,COL1A1,COL1A2,COL2A1,COL3A1,COL5A3,EDN1,PDGFRB
Atherosclerosis Signaling	8.5	0.181	NaN	APOC2,APOD,CCL2,CD36,COL10A1,COL18A1,COL1A1,COL1A2,COL2A1,COL3A1,COL5A3,F3,IL6,LCAT,LPL,PDGFB,PDGFC,PDGFD,PLA2G4A,PLB1,RBP4,SELE,TNFRSF12A
Role of Osteoblasts, Osteoclasts and Chondrocytes in Rheumatoid Arthritis	8.41	0.141	NaN	ADAMTS4,ADAMTS5,BMP4,BMP6,BMP8A,COL1A1,DKK3,FOS,FRZB,FZD1,FZD2,FZD4,FZD7,GSN,IGF1,IL1R1,IL1RAPL1,IL6,ITGA2,ITGA3,ITGA5,ITGB3,JUN,MAP3K5,NGFR,SFRP2,SFRP4,SMO,TCF7L1,TNFRSF1A,WNT11
IL-8 Signaling	8.2	0.145	5	ANGPT1,CDH1,EGFR,FLT1,FOS,GNG11,GNG12,HBEGF,ITGAV,ITGB3,ITGB5,JUN,KDR,MYL9,NOX4,PDGFC,PGF,PRKD1,PRKD3,PTGS2,RASD1,RHOB,RHOBTB1,RHOJ,RRAS,TEK,VEGFA,VEGFC,VEGFD
Sertoli Cell-Sertoli Cell Junction Signaling	7.74	0.146	NaN	A2M,ACTA2,ACTG2,CDH1,CLDN1,CLDN5,CTNNA1,GUCY1A1,GUCY1B1,ITGA2,ITGA3,ITGA5,JAM2,JUN,MAP3K5,MAP3K6,MAP3K8,NECTIN2,PRKG1,RASD1,RRAS,SPTBN1,TGFB3,TGFBR3,TNFRSF1A,TUBB6,VCL
Colorectal Cancer Metastasis Signaling	7.51	0.126	4.811	ADCY4,CDH1,EGFR,FOS,FZD1,FZD2,FZD4,FZD7,GNG11,GNG12,IL6,JUN,MMP11,MMP19,PDGFC,PGF,PTGS2,RASD1,RHOB,RHOBTB1,RHOJ,RRAS,SMO,TCF7L1,TGFB2,TGFB3,TLR3,TNFRSF1A,VEGFA,VEGFC,VEGFD,WNT11
HIF1Œ± Signaling	7.36	0.137	4.914	ADM,BMP6,EDN1,FLT1,HGF,HSPA1A/HSPA1B,IGF1,IL6,JUN,KDR,MMP11,MMP19,NOX4,PDGFB,PDGFC,PGF,PRKD1,PRKD3,RASD1,RRAS,SERPINE1,SLC2A14,TF,TGFB2,VEGFA,VEGFC,VEGFD,VIM
Caveolar-mediated Endocytosis Signaling	7.32	0.219	NaN	ACTA2,ACTG2,CAV1,CAVIN1,EGFR,FLNB,ITGA11,ITGA2,ITGA3,ITGA5,ITGA7,ITGAV,ITGB3,ITGB4,ITGB5,ITGB8
Human Embryonic Stem Cell Pluripotency	7.29	0.163	NaN	ACVR1,BMP4,BMP6,BMP8A,FGFR1,FZD1,FZD2,FZD4,FZD7,INHBA,NTF3,PDGFB,PDGFC,PDGFD,PDGFRB,SMAD7,SMO,SPHK1,TCF7L1,TGFB2,TGFB3,WNT11
Leukocyte Extravasation Signaling	7.16	0.137	1.043	ACTA2,ACTG2,ARHGAP12,CDH5,CLDN1,CLDN5,CTNNA1,EDIL3,ITGA2,ITGA3,ITGA5,ITGB3,JAM2,MMP11,MMP19,MSN,PECAM1,PRKD1,PRKD3,RAP1GAP,RAPGEF3,RDX,THY1,TIMP1,TIMP3,TIMP4,VCL
Sperm Motility	7.13	0.13	3.742	AXL,EGFR,EPHA2,EPHA3,EPHB4,ERBB3,FGFR1,FLT1,GUCY1A1,GUCY1B1,ITPR3,KDR,LCAT,LTK,MERTK,NPR1,PDE1A,PDE1C,PDGFRB,PLA2G4A,PLB1,PLCE1,PRKD1,PRKD3,PRKG1,ROR1,TEK,TIE1,YES1
Wnt/Œ≤-catenin Signaling	7.13	0.145	-0.655	ACVR1,CDH1,CDH5,DKK3,FRZB,FZD1,FZD2,FZD4,FZD7,GJA1,JUN,SFRP2,SFRP4,SMO,SOX10,SOX13,SOX7,SOX9,TCF7L1,TGFB2,TGFB3,TGFBR3,TLE1,TLE3,WNT11
Epithelial Adherens Junction Signaling	6.98	0.151	NaN	ACTA2,ACTG2,ACVR1,CDH1,CTNNA1,EGFR,FGFR1,HGF,MYH11,MYH9,MYL9,NECTIN2,NOTCH1,RASD1,RRAS,SNAI1,SNAI2,TCF7L1,TGFB2,TGFBR3,TUBB6,VCL,YES1
Coagulation System	6.94	0.314	0.302	A2M,BDKRB2,F10,F13A1,F2R,F3,PLAT,PROS1,SERPINE1,THBD,VWF
Nitric Oxide Signaling in the Cardiovascular System	6.82	0.182	3.771	BDKRB2,CAV1,FLT1,GUCY1A1,GUCY1B1,ITPR3,KDR,PDE1A,PDE1C,PDGFC,PGF,PLN,PRKD1,PRKD3,PRKG1,VEGFA,VEGFC,VEGFD
Agranulocyte Adhesion and Diapedesis	6.76	0.135	NaN	ACTA2,ACTG2,AOC3,CCL2,CD34,CDH5,CLDN1,CLDN5,CXCL2,CXCL3,FN1,IL1R1,ITGA2,ITGA3,ITGA5,MMP11,MMP19,MSN,MYH11,MYH9,MYL9,PECAM1,PODXL,RDX,SELE,TNFRSF1A
Regulation Of The Epithelial Mesenchymal Transition In Development Pathway	6.42	0.19	3.357	CDH1,FZD1,FZD2,FZD4,FZD7,GLI1,GLI2,GLI3,JAG1,LOX,NOTCH1,SMO,SNAI1,SNAI2,TCF7L1,WNT11
HGF Signaling	6.05	0.162	3.742	DOCK1,ELK3,ETS2,FOS,HGF,IL6,ITGA2,ITGA3,ITGA5,JUN,MAP3K5,MAP3K6,MAP3K8,PRKD1,PRKD3,PTGS2,RASD1,RRAS
Germ Cell-Sertoli Cell Junction Signaling	6.05	0.135	NaN	A2M,ACTA2,ACTG2,CDH1,CTNNA1,GSN,ITGA2,ITGA3,LAMC3,MAP3K5,MAP3K6,MAP3K8,NECTIN2,RASD1,RHOB,RHOBTB1,RHOJ,RRAS,TGFB2,TGFB3,TNFRSF1A,TUBB6,VCL
Intrinsic Prothrombin Activation Pathway	6.04	0.262	2.53	COL10A1,COL18A1,COL1A1,COL1A2,COL2A1,COL3A1,COL5A3,F10,F13A1,PROS1,THBD
Integrin Signaling	5.92	0.122	4.379	ACTA2,ACTG2,BCAR3,CAPN6,CAV1,DOCK1,GSN,ITGA11,ITGA2,ITGA3,ITGA5,ITGA7,ITGAV,ITGB3,ITGB4,ITGB5,ITGB8,MYL9,MYLK,PDGFB,RASD1,RHOB,RHOBTB1,RHOJ,RRAS,VCL
IL-6 Signaling	5.91	0.152	3.771	A2M,CEBPB,COL1A1,FOS,HSPB1,HSPB2,HSPB3,HSPB7,IL1R1,IL1RAPL1,IL6,JUN,NGFR,RASD1,RRAS,SOCS3,TNFAIP6,TNFRSF1A,VEGFA
Ephrin Receptor Signaling	5.66	0.128	2.333	ANGPT1,EFNA1,EFNB1,EPHA2,EPHA3,EPHB4,GNG11,GNG12,ITGA2,ITGA3,ITGA5,NGEF,PDGFB,PDGFC,PDGFD,PGF,PTPN13,RASD1,RRAS,SDC2,VEGFA,VEGFC,VEGFD
Apelin Cardiac Fibroblast Signaling Pathway	5.57	0.348	-2.828	AGTR1,APLN,CCN2,IL6,SERPINE1,SPHK1,TGFB2,TGFB3
Protein Kinase A Signaling	5.57	0.0952	0.365	ADCY4,CDC14B,CREM,DUSP1,DUSP5,DUSP6,EYA2,FLNB,GLI3,GNG11,GNG12,ITPR3,KDELR3,MYL9,MYLK,NGFR,PDE1A,PDE1C,PDE8A,PDE8B,PLCE1,PLN,PPP1R14A,PPP1R3C,PRKD1,PRKD3,PTGS2,PTPN13,PTPRB,PTPRG,PTPRK,PTPRZ1,PYGL,SMO,TCF7L1,TGFB2,TGFB3,TNS2
STAT3 Pathway	5.4	0.141	3.5	BMP6,EGFR,FGFR1,FLT1,GHR,HGF,IGF1,IL17RC,IL1R1,KDR,NGFR,PDGFB,PDGFRB,RASD1,RRAS,SOCS3,TGFB2,TGFBR3,VEGFA
Agrin Interactions at Neuromuscular Junction	5.38	0.179	3.162	ACTA2,ACTG2,EGFR,ERBB3,ITGA2,ITGA3,ITGA5,ITGB3,JUN,LAMA2,LAMB1,LAMC1,RASD1,RRAS
Regulation Of The Epithelial Mesenchymal Transition By Growth Factors Pathway	5.33	0.122	3.962	CDH1,EGFR,EGR1,FGFR1,FOS,HGF,IL6,JUN,LATS2,NGFR,PDGFB,PDGFC,PDGFD,PDGFRB,RASD1,RRAS,SNAI1,SNAI2,TGFB2,TGFB3,TNFRSF1A,VIM,YAP1
Ovarian Cancer Signaling	5.21	0.137	2.53	EDN1,EDNRA,EGFR,FZD1,FZD2,FZD4,FZD7,GJA1,PDGFC,PGF,PTGS2,RASD1,RRAS,SMO,TCF7L1,VEGFA,VEGFC,VEGFD,WNT11
Regulation of the Epithelial-Mesenchymal Transition Pathway	5.18	0.12	NaN	CDH1,EGFR,EGR1,FGFR1,FZD1,FZD2,FZD4,FZD7,HGF,JAG1,LOX,NOTCH1,PDGFD,PDGFRB,RASD1,RRAS,SMO,SNAI1,SNAI2,TCF7L1,TGFB2,TGFB3,WNT11
PPAR Signaling	5.15	0.154	-2.673	FOS,IL1R1,IL1RAPL1,JUN,NGFR,NR2F1,PDGFB,PDGFC,PDGFD,PDGFRB,PPARA,PPARG,PTGS2,RASD1,RRAS,TNFRSF1A
IGF-1 Signaling	5.15	0.154	1.342	CCN1,CCN2,CCN3,FOS,IGF1,IGFBP2,IGFBP3,IGFBP4,IGFBP5,IGFBP6,IGFBP7,JUN,NEDD4,RASD1,RRAS,SOCS3
Clathrin-mediated Endocytosis Signaling	5.14	0.119	NaN	ACTA2,ACTG2,APOC2,APOD,DAB2,F2R,IGF1,ITGA5,ITGB3,ITGB4,ITGB5,ITGB8,LDLR,MYO1E,PDGFB,PDGFC,PDGFD,PGF,RBP4,TF,VEGFA,VEGFC,VEGFD
Granulocyte Adhesion and Diapedesis	5.12	0.122	NaN	CCL2,CDH5,CLDN1,CLDN5,CXCL2,CXCL3,IL1R1,IL1RAPL1,ITGA2,ITGA3,ITGA5,ITGB3,MMP11,MMP19,MSN,NGFR,PECAM1,RDX,SDC2,SELE,THY1,TNFRSF1A
RAR Activation	5.1	0.119	NaN	ADCY4,ADH1C,AKR1C3,ALDH1A1,ALDH1A3,DHRS3,DUSP1,FOS,IGFBP3,JUN,MAP3K5,NR2F1,NR2F2,PRKD1,PRKD3,RBP4,RBP7,SMAD7,SORBS3,TGFB2,TGFB3,VEGFA,ZBTB16
Role of Tissue Factor in Cancer	5.09	0.145	NaN	CCN1,CCN2,EGFR,EGR1,F10,F2RL1,F3,HBEGF,ITGA3,ITGAV,ITGB3,ITGB5,RASD1,RRAS,VEGFA,VEGFC,YES1
Basal Cell Carcinoma Signaling	5.06	0.181	1.667	BMP4,BMP6,BMP8A,FZD1,FZD2,FZD4,FZD7,GLI1,GLI2,GLI3,SMO,TCF7L1,WNT11
Paxillin Signaling	4.93	0.148	2.828	ACTA2,ACTG2,DOCK1,ITGA11,ITGA2,ITGA3,ITGA5,ITGA7,ITGAV,ITGB3,ITGB4,ITGB5,ITGB8,RASD1,RRAS,VCL
eNOS Signaling	4.9	0.126	3	ADCY4,AQP1,AQP6,BDKRB2,CAV1,FLT1,GUCY1A1,GUCY1B1,HSPA1A/HSPA1B,ITPR3,KDR,NOSTRIN,PDGFC,PGF,PRKD1,PRKD3,PRKG1,VEGFA,VEGFC,VEGFD
IL-15 Production	4.89	0.14	4.123	AXL,EGFR,EPHA2,EPHA3,EPHB4,ERBB3,FGFR1,FLT1,IL6,KDR,LTK,MERTK,PDGFRB,ROR1,TEK,TIE1,YES1
Adipogenesis pathway	4.86	0.134	NaN	BMP4,CEBPB,CEBPD,EGR2,FGFR1,FZD1,FZD2,FZD4,FZD7,KLF5,LPL,NR1D2,NR2F2,PPARG,SMO,SOX9,SREBF1,TNFRSF1A
Signaling by Rho Family GTPases	4.84	0.107	3.545	ACTA2,ACTG2,ARHGEF17,CDH1,CDH11,CDH15,CDH19,CDH5,CYFIP1,FOS,GNG11,GNG12,ITGA2,ITGA3,ITGA5,JUN,MSN,MYL9,MYLK,NEDD4,NOX4,RDX,RHOB,RHOBTB1,RHOJ,VIM
Macropinocytosis Signaling	4.8	0.171	2.236	HGF,ITGA5,ITGB3,ITGB4,ITGB5,ITGB8,PDGFB,PDGFC,PDGFD,PRKD1,PRKD3,RASD1,RRAS
Actin Cytoskeleton Signaling	4.75	0.11	3.153	ACTA2,ACTG2,ARHGAP24,CYFIP1,DOCK1,F2R,FN1,GNG12,GSN,ITGA2,ITGA3,ITGA5,MSN,MYH11,MYH9,MYL9,MYLK,PDGFB,PDGFC,PDGFD,RASD1,RDX,RRAS,VCL
Factors Promoting Cardiogenesis in Vertebrates	4.73	0.127	4.359	ACVR1,BMP4,BMP6,BMP8A,FZD1,FZD2,FZD4,FZD7,MEF2C,NOX4,PLCE1,PRKD1,PRKD3,SMO,TCF7L1,TGFB2,TGFB3,TGFBR3,WNT11
Tight Junction Signaling	4.55	0.119	NaN	ACTA2,ACTG2,CLDN1,CLDN5,CNKSR3,CTNNA1,F2RL2,FOS,JAM2,JUN,MYH11,MYH9,MYL9,MYLK,NECTIN2,NGFR,TGFB2,TGFB3,TNFRSF1A,VCL
PCP pathway	4.44	0.183	3.162	CTHRC1,EFNB1,FZD1,FZD2,FZD4,FZD7,JUN,RSPO3,SMO,VANGL1,WNT11
Virus Entry via Endocytic Pathways	4.37	0.14	NaN	ACTA2,ACTG2,CAV1,FLNB,ITGA2,ITGA3,ITGA5,ITGB3,ITGB4,ITGB5,ITGB8,PRKD1,PRKD3,RASD1,RRAS
Glioma Invasiveness Signaling	4.24	0.162	1.265	F2R,ITGAV,ITGB3,ITGB5,RASD1,RHOB,RHOBTB1,RHOJ,RRAS,TIMP1,TIMP3,TIMP4
Inhibition of Angiogenesis by TSP1	4.18	0.235	2.236	CD36,GUCY1A1,GUCY1B1,JUN,KDR,SDC2,THBS1,VEGFA
Glioblastoma Multiforme Signaling	4.15	0.115	4.123	EGFR,FZD1,FZD2,FZD4,FZD7,IGF1,ITPR3,PDGFB,PDGFC,PDGFD,PDGFRB,PLCE1,RASD1,RHOB,RHOBTB1,RHOJ,RRAS,SMO,WNT11
RhoGDI Signaling	4.12	0.111	-3.153	ACTA2,ACTG2,ARHGAP12,ARHGEF17,CDH1,CDH11,CDH15,CDH19,CDH5,GNG11,GNG12,ITGA2,ITGA3,ITGA5,MSN,MYL9,RDX,RHOB,RHOBTB1,RHOJ
VDR/RXR Activation	4.01	0.154	-1	CEBPB,GADD45A,HES1,IGFBP3,IGFBP5,IGFBP6,KLF4,PRKD1,PRKD3,SEMA3B,TGFB2,THBD
Aryl Hydrocarbon Receptor Signaling	3.95	0.119	0.707	ALDH1A1,ALDH1A3,CYP1B1,FOS,HSPB1,HSPB2,HSPB3,HSPB7,IL6,JUN,MGST1,NFIB,NFIX,NQO1,NR2F1,TGFB2,TGFB3
Complement System	3.9	0.216	-0.378	C1R,C1S,C3,C6,CFB,CFH,CFI,SERPING1
Corticotropin Releasing Hormone Signaling	3.87	0.117	3.464	ADCY4,FOS,GLI1,GLI2,GLI3,GUCY1A1,GUCY1B1,ITPR3,JUN,MEF2C,NPR1,NR4A1,PRKD1,PRKD3,PTGS2,SMO,VEGFA
Inhibition of Matrix Metalloproteases	3.73	0.205	1.134	A2M,MMP11,MMP19,SDC2,THBS2,TIMP1,TIMP3,TIMP4
ERK/MAPK Signaling	3.7	0.104	2.357	DOCK1,DUSP1,DUSP6,ELK3,ETS2,FOS,HSPB1,HSPB2,HSPB3,HSPB7,ITGA2,ITGA3,ITGA5,PLA2G4A,PPARG,PPP1R14A,PPP1R3C,RAPGEF3,RASD1,RRAS
Breast Cancer Regulation by Stathmin1	3.7	0.0745	NaN	ADGRA2,ADGRF5,ADGRG6,ADORA2B,ADRA2B,AGTR1,ARHGEF17,BDKRB2,BMP6,CALCRL,EDNRA,EDNRB,F2R,F2RL1,F2RL2,FZD1,FZD2,FZD4,FZD7,GNG11,GNG12,GPR155,GPR17,GPR4,HGF,HTR2B,IGF1,JUN,P2RY12,PDGFB,PDGFC,PGF,PPP1R14A,PPP1R3C,PRKD1,PRKD3,RASD1,RRAS,SMO,TGFB2,TUBB6,VEGFA,VEGFC,VEGFD
HER-2 Signaling in Breast Cancer	3.69	0.143	NaN	AREG,EGFR,ERBB3,ITGB3,ITGB4,ITGB5,ITGB8,MAP3K5,PRKD1,PRKD3,RASD1,RRAS
VEGF Family Ligand-Receptor Interactions	3.69	0.143	3.317	FLT1,FOS,KDR,PGF,PLA2G4A,PRKD1,PRKD3,RASD1,RRAS,VEGFA,VEGFC,VEGFD
PAK Signaling	3.67	0.134	2.714	ARHGAP10,EPHA3,ITGA2,ITGA3,ITGA5,MYL9,MYLK,PDGFB,PDGFC,PDGFD,PDGFRB,RASD1,RRAS
HMGB1 Signaling	3.67	0.109	3.357	CCL2,FOS,IL1R1,IL6,JUN,NGFR,OSM,PLAT,RASD1,RHOB,RHOBTB1,RHOJ,RRAS,SELE,SERPINE1,TGFB2,TGFB3,TNFRSF1A
Adrenomedullin signaling pathway	3.58	0.102	3.771	ADCY4,ADM,C3,CALCRL,CEBPB,CFH,FOS,GUCY1A1,GUCY1B1,ITPR3,KCNN3,MYLK,NPR1,PLCE1,PPARG,PRKG1,RAMP2,RASD1,RRAS,TFAP2A
FXR/RXR Activation	3.56	0.119	NaN	AGT,APOC2,APOD,C3,ITIH4,LCAT,LPL,PLTP,PON3,PPARA,PPARG,RBP4,SERPINF1,SREBF1,TF
PTEN Signaling	3.56	0.119	-3.207	CNKSR3,EGFR,FGFR1,FLT1,GHR,ITGA2,ITGA3,ITGA5,KDR,NGFR,PDGFRB,RASD1,RRAS,SYNJ2,TGFBR3
Gap Junction Signaling	3.55	0.101	NaN	ACTA2,ACTG2,ADCY4,CAV1,CCN3,EGFR,GJA1,GJA4,GUCY1A1,GUCY1B1,HTR2B,ITPR3,NPR1,PLCE1,PRKD1,PRKD3,PRKG1,RASD1,RRAS,TUBB6
Molecular Mechanisms of Cancer	3.54	0.0818	NaN	ADCY4,ARHGEF17,BMP4,BMP6,BMP8A,CDH1,CTNNA1,FOS,FZD1,FZD2,FZD4,FZD7,GLI1,ITGA2,ITGA3,ITGA5,JUN,MAP3K5,NOTCH1,PRKD1,PRKD3,RAPGEF3,RASD1,RHOB,RHOBTB1,RHOJ,RRAS,SMAD7,SMO,TGFB2,TGFB3,WNT11
Extrinsic Prothrombin Activation Pathway	3.41	0.312	0	F10,F13A1,F3,PROS1,THBD
NRF2-mediated Oxidative Stress Response	3.38	0.101	1.897	ACTA2,ACTG2,AOX1,DNAJB4,DNAJC1,ENC1,EPHX1,FOS,JUN,MAF,MAFF,MAP3K5,MGST1,NQO1,PRKD1,PRKD3,RASD1,RRAS,SOD3
Cellular Effects of Sildenafil (Viagra)	3.38	0.115	NaN	ACTA2,ACTG2,ADCY4,GUCY1A1,GUCY1B1,ITPR3,KCNN3,MYH11,MYH9,MYL9,MYLK,PDE1A,PDE1C,PLCE1,PRKG1
PPARŒ±/RXRŒ± Activation	3.35	0.1	-1.698	ACVR1,ADCY4,CD36,GHR,IL1R1,IL1RAPL1,IL6,ITGB5,JUN,LPL,MEF2C,NR2F1,PLCE1,PPARA,RASD1,RRAS,TGFB2,TGFB3,TGFBR3
Cholecystokinin/Gastrin-mediated Signaling	3.31	0.118	3.464	CREM,EGFR,FOS,ITPR3,JUN,MEF2C,PRKD1,PRKD3,PTGS2,RASD1,RHOB,RHOBTB1,RHOJ,RRAS
IL-17A Signaling in Fibroblasts	3.26	0.2	NaN	CCL2,CEBPB,CEBPD,FOS,IL17RC,IL6,JUN
NF-Œ∫B Signaling	3.23	0.101	4.123	BMP4,CARD10,EGFR,FGFR1,FLT1,GHR,IL1R1,KDR,LTBR,MAP3K8,NGFR,PDGFRB,PELI1,RASD1,RRAS,TGFBR3,TLR3,TNFRSF1A
CDK5 Signaling	3.21	0.12	1.897	ADCY4,CABLES1,EGR1,FOSB,ITGA2,ITGA3,LAMB1,LAMC1,NGFR,PPP1R14A,PPP1R3C,RASD1,RRAS
Neuregulin Signaling	3.15	0.125	2.828	AREG,DCN,EGFR,ERBB3,HBEGF,ITGA2,ITGA3,ITGA5,PRKD1,PRKD3,RASD1,RRAS
TGF-Œ≤ Signaling	3.15	0.125	2.53	ACVR1,BMP4,FOS,INHBA,INHBB,JUN,RASD1,RRAS,SERPINE1,SMAD7,TGFB2,TGFB3
Bladder Cancer Signaling	3.11	0.124	NaN	CDH1,EGFR,MMP11,MMP19,PDGFC,PGF,RASD1,RRAS,THBS1,VEGFA,VEGFC,VEGFD
VEGF Signaling	3.03	0.121	2.714	ACTA2,ACTG2,FLT1,KDR,PDGFC,PGF,RASD1,RRAS,VCL,VEGFA,VEGFC,VEGFD
PDGF Signaling	3.02	0.128	2.53	CAV1,FOS,JUN,PDGFB,PDGFC,PDGFD,PDGFRB,RASD1,RRAS,SPHK1,SYNJ2
Endothelin-1 Signaling	2.98	0.0957	2.668	ADCY4,EDN1,EDNRA,EDNRB,FOS,GUCY1A1,GUCY1B1,ITPR3,JUN,LCAT,PLA2G4A,PLB1,PLCE1,PRKD1,PRKD3,PTGS2,RASD1,RRAS
Production of Nitric Oxide and Reactive Oxygen Species in Macrophages	2.98	0.0957	3.153	APOC2,APOD,FOS,JUN,MAP3K5,MAP3K6,MAP3K8,NGFR,PPARA,PPP1R14A,PPP1R3C,PRKD1,PRKD3,RBP4,RHOB,RHOBTB1,RHOJ,TNFRSF1A
GŒ±12/13 Signaling	2.92	0.108	0.832	CDH1,CDH11,CDH15,CDH19,CDH5,F2R,F2RL1,F2RL2,JUN,MAP3K5,MEF2C,MYL9,RASD1,RRAS
Cardiac Hypertrophy Signaling	2.88	0.0875	4.243	ADCY4,ADRA2B,GNG11,GNG12,HSPB1,IGF1,IL6,JUN,MAP3K5,MAP3K6,MAP3K8,MEF2C,MYL9,PLCE1,RASD1,RHOB,RHOBTB1,RHOJ,RRAS,TGFB2,TGFB3
Mouse Embryonic Stem Cell Pluripotency	2.88	0.117	3.317	BMP4,FZD1,FZD2,FZD4,FZD7,ID1,ID3,ID4,RASD1,RRAS,SMO,TCF7L1
LPS/IL-1 Mediated Inhibition of RXR Function	2.87	0.0893	0	ACOX2,ALDH1A1,ALDH1A3,APOC2,CHST3,CHST7,FABP7,FMO3,IL1R1,IL1RAPL1,JUN,MGST1,NGFR,PLTP,PPARA,SMOX,SOD3,SREBF1,TNFRSF1A,UST
Phospholipase C Signaling	2.87	0.0856	3.638	ADCY4,AHNAK,ARHGEF17,GNG11,GNG12,ITGA2,ITGA3,ITGA5,ITPR3,MEF2C,MYL9,PLA2G4A,PLCE1,PPP1R14A,PRKD1,PRKD3,RAPGEF3,RASD1,RHOB,RHOBTB1,RHOJ,RRAS
p38 MAPK Signaling	2.85	0.11	3.051	DUSP1,HSPB1,HSPB2,HSPB3,HSPB7,IL1R1,IL1RAPL1,MAP3K5,MEF2C,PLA2G4A,TGFB2,TGFB3,TNFRSF1A
Role of NANOG in Mammalian Embryonic Stem Cell Pluripotency	2.81	0.109	NaN	BMP4,BMP6,BMP8A,FZD1,FZD2,FZD4,FZD7,GATA6,RASD1,RRAS,SMO,TCF7L1,WNT11
Estrogen Receptor Signaling	2.79	0.0793	4.2	ADCY4,AGT,CAV1,EGFR,FBXO32,FOS,GNG11,HES1,IGF1,JUN,MMP11,MMP19,MYL9,NOTCH1,PDGFC,PGF,PLCE1,PRKD1,PRKD3,RASD1,RRAS,SNAI1,TRIM63,VEGFA,VEGFC,VEGFD
CXCR4 Signaling	2.72	0.0958	2.887	ADCY4,DOCK1,EGR1,FOS,GNG11,GNG12,ITPR3,JUN,MYL9,PRKD1,PRKD3,RASD1,RHOB,RHOBTB1,RHOJ,RRAS
Regulation of Actin-based Motility by Rho	2.7	0.117	2.333	ACTA2,ACTG2,GSN,ITGA2,ITGA3,ITGA5,MYL9,MYLK,RHOB,RHOBTB1,RHOJ
Neuroinflammation Signaling Pathway	2.69	0.0803	3.578	ACVR1,APP,BACE2,CCL2,FOS,FZD1,GABRA2,GABRE,IL1R1,IL6,JUN,MFGE8,NOX4,NTF3,P2RX7,PLA2G4A,PTGS2,S100B,SLC6A1,TGFB2,TGFB3,TGFBR3,TLR3,TNFRSF1A
Pancreatic Adenocarcinoma Signaling	2.67	0.11	3.162	CYP2E1,EGFR,HBEGF,NOTCH1,PDGFC,PGF,PTGS2,TGFB2,TGFB3,VEGFA,VEGFC,VEGFD
FAK Signaling	2.66	0.116	NaN	ACTA2,ACTG2,CAPN6,DOCK1,EGFR,ITGA2,ITGA3,ITGA5,RASD1,RRAS,VCL
Unfolded protein response	2.64	0.143	2.828	CEBPB,CEBPD,CEBPE,HSPA1A/HSPA1B,MAP3K5,PPARG,PPP1R15A,SREBF1
NF-Œ∫B Activation by Viruses	2.64	0.122	3	ITGA2,ITGA3,ITGA5,ITGAV,ITGB3,ITGB5,PRKD1,PRKD3,RASD1,RRAS
Retinoate Biosynthesis I	2.57	0.176	2.449	ADH1C,AKR1C3,ALDH1A1,ALDH1A3,DHRS3,RBP7
Aldosterone Signaling in Epithelial Cells	2.55	0.0949	1.342	DNAJB4,DNAJC1,DUSP1,HSPA12B,HSPA1A/HSPA1B,HSPB1,HSPB2,HSPB3,HSPB7,ITPR3,NEDD4,PLCE1,PRKD1,PRKD3,SMO
FAT10 Cancer Signaling Pathway	2.53	0.152	2.646	ACVR1,IL6,NGFR,TGFB2,TGFB3,TGFBR3,TNFRSF1A
Histidine Degradation VI	2.53	0.267	2	AMDHD1,CYP26B1,CYP2E1,MICAL2
White Adipose Tissue Browning Pathway	2.5	0.101	3.606	ADCY4,CEBPB,DIO2,FGFR1,GUCY1A1,GUCY1B1,KDR,LDHD,NPR1,PPARA,PPARG,PRKG1,VEGFA
Thrombin Signaling	2.5	0.0865	2.887	ADCY4,EGFR,F2R,F2RL2,GATA6,GNG11,GNG12,ITPR3,MYL9,MYLK,PLCE1,PRKD1,PRKD3,RASD1,RHOB,RHOBTB1,RHOJ,RRAS
Apelin Endothelial Signaling Pathway	2.47	0.104	2.111	ADCY4,ANGPT1,APLN,CCL2,FOS,JUN,MEF2C,PRKD1,PRKD3,RASD1,RRAS,TEK
IL-12 Signaling and Production in Macrophages	2.41	0.0985	NaN	APOC2,APOD,CEBPB,FOS,JUN,MAF,MAP3K8,PPARG,PRKD1,PRKD3,RBP4,TGFB2,TGFB3
Notch Signaling	2.38	0.162	NaN	DLL4,HES1,HEY1,HEY2,JAG1,NOTCH1
UVC-Induced MAPK Signaling	2.28	0.137	2.449	EGFR,FOS,JUN,PRKD1,PRKD3,RASD1,RRAS
Regulation of Cellular Mechanics by Calpain Protease	2.24	0.123	2.449	CAPN6,EGFR,ITGA2,ITGA3,ITGA5,RASD1,RRAS,VCL
BEX2 Signaling Pathway	2.23	0.114	3	JUN,LGALS1,NGFR,PDGFC,PGF,TCF7L1,VEGFA,VEGFC,VEGFD
ErbB Signaling	2.21	0.106	3	AREG,EGFR,ERBB3,FOS,HBEGF,JUN,PRKD1,PRKD3,RASD1,RRAS
IL-17 Signaling	2.19	0.113	NaN	CCL2,CEBPB,IL17RC,IL6,JUN,PTGS2,RASD1,RRAS,TIMP1
GNRH Signaling	2.18	0.0867	3.742	ADCY4,EGFR,EGR1,FOS,GNG11,HBEGF,ITPR3,JUN,MAP3K5,MAP3K6,MAP3K8,PRKD1,PRKD3,RASD1,RRAS
14-3-3-mediated Signaling	2.13	0.0945	3.162	FOS,JUN,MAP3K5,PLCE1,PRKD1,PRKD3,RASD1,RRAS,TNFRSF1A,TUBB6,VIM,YAP1
P2Y Purigenic Receptor Signaling Pathway	2.13	0.0945	2.333	ADCY4,FOS,GNG11,GNG12,ITGB3,JUN,P2RY12,PLCE1,PRKD1,PRKD3,RASD1,RRAS
Semaphorin Neuronal Repulsive Signaling Pathway	2.05	0.0923	1.155	CSPG4,GUCY1A1,GUCY1B1,ITGA2,ITGA3,ITGA5,MYL9,PLXND1,PRKG1,RRAS,SEMA5A,VCAN
Tec Kinase Signaling	2.01	0.0854	3.317	ACTA2,ACTG2,FOS,GNG11,GNG12,ITGA2,ITGA3,ITGA5,PRKD1,PRKD3,RHOB,RHOBTB1,RHOJ,YES1
Growth Hormone Signaling	2.01	0.113	1.89	A2M,FOS,GHR,IGF1,IGFBP3,PRKD1,PRKD3,SOCS3
Actin Nucleation by ARP-WASP Complex	1.97	0.111	2.449	ITGA2,ITGA3,ITGA5,RASD1,RHOB,RHOBTB1,RHOJ,RRAS
Relaxin Signaling	1.96	0.0867	2.828	ADCY4,FOS,GNG11,GNG12,GUCY1A1,GUCY1B1,JUN,NPR1,PDE1A,PDE1C,PDE8A,PDE8B,VEGFA
Renin-Angiotensin Signaling	1.95	0.0932	3	ADCY4,AGT,AGTR1,CCL2,FOS,ITPR3,JUN,PRKD1,PRKD3,RASD1,RRAS
Hepatic Cholestasis	1.92	0.0811	NaN	ADCY4,IL1R1,IL1RAPL1,IL6,JUN,NGFR,OSM,PPARA,PRKD1,PRKD3,SLCO1C1,SREBF1,TGFB2,TGFB3,TNFRSF1A
Senescence Pathway	1.89	0.0727	4.025	ACVR1,ATF3,CAPN6,CEBPB,ELK3,ETS2,GADD45A,GADD45B,IL6,ITPR3,JUN,PDK4,RASD1,RRAS,SERPINE1,SMAD7,STING1,TGFB2,TGFB3,TGFBR3
Iron homeostasis signaling pathway	1.88	0.0876	NaN	BMP4,BMP6,BMP8A,CP,CYBRD1,EGFR,HEPH,IL6,PDGFB,PDGFRB,SLC25A37,TF
Neurotrophin/TRK Signaling	1.84	0.105	1.89	FOS,JUN,MAP3K5,NGFR,NTF3,RASD1,RRAS,SPRY2
Death Receptor Signaling	1.84	0.0989	0.333	ACTA2,ACTG2,HSPB1,HSPB2,HSPB3,HSPB7,LMNA,MAP3K5,TNFRSF1A
RhoA Signaling	1.83	0.0894	1.265	ACTA2,ACTG2,ARHGAP12,IGF1,MSN,MYL9,MYLK,NEDD4,NGEF,RDX,RTKN
Noradrenaline and Adrenaline Degradation	1.82	0.143	2.236	ADH1A,ADH1C,ALDH1A1,ALDH1A3,SMOX
Wnt/Ca+ pathway	1.82	0.113	2.646	FZD1,FZD2,FZD4,FZD7,PLCE1,ROR1,SMO
Pregnenolone Biosynthesis	1.81	0.231	NaN	CYP26B1,CYP2E1,MICAL2
GŒ±i Signaling	1.78	0.088	1.414	ADCY4,ADRA2B,AGTR1,CAV1,GNG11,GNG12,GPR17,P2RY12,RAP1GAP,RASD1,RRAS
Phagosome Formation	1.78	0.088	NaN	FN1,ITGA2,ITGA3,ITGA5,PLCE1,PRKD1,PRKD3,RHOB,RHOBTB1,RHOJ,TLR3
Glioma Signaling	1.75	0.0909	3	EGFR,IGF1,PDGFB,PDGFC,PDGFD,PDGFRB,PRKD1,PRKD3,RASD1,RRAS
Thyroid Cancer Signaling	1.74	0.101	2.121	CDH1,FOS,IGF1,JUN,NTF3,RASD1,RRAS,TCF7L1
Role of MAPK Signaling in the Pathogenesis of Influenza	1.71	0.1	NaN	CCL2,LCAT,MAP3K5,PLA2G4A,PLB1,PTGS2,RASD1,RRAS
IL-17A Signaling in Gastric Cells	1.71	0.16	2	EGFR,FOS,IL17RC,JUN
Role of JAK family kinases in IL-6-type Cytokine Signaling	1.71	0.16	NaN	IL6,OSM,OSMR,SOCS3
Xenobiotic Metabolism Signaling	1.71	0.0697	NaN	ALDH1A1,ALDH1A3,CHST3,CHST7,CYP1B1,FMO3,IL6,MAF,MAP3K5,MAP3K6,MAP3K8,MGST1,NQO1,PRKD1,PRKD3,RASD1,RRAS,SMOX,SOD3,UST
Œ±-Adrenergic Signaling	1.7	0.0938	2.236	ADCY4,GNG11,GNG12,ITPR3,PRKD1,PRKD3,PYGL,RASD1,RRAS
Natural Killer Cell Signaling	1.7	0.0761	0.258	COL10A1,COL18A1,COL1A1,COL1A2,COL2A1,COL3A1,COL5A3,HSPA1A/HSPA1B,MAP3K5,MAP3K6,MAP3K8,NECTIN2,PVR,RASD1,RRAS
p70S6K Signaling	1.69	0.0853	3.162	AGT,AGTR1,EGFR,F2R,F2RL1,F2RL2,PLCE1,PRKD1,PRKD3,RASD1,RRAS
Prolactin Signaling	1.68	0.0988	1.633	CEBPB,FOS,JUN,PRKD1,PRKD3,RASD1,RRAS,SOCS3
Dopamine-DARPP32 Feedback in cAMP Signaling	1.68	0.0798	1.897	ADCY4,CREM,GUCY1A1,GUCY1B1,ITPR3,KCNJ2,KCNJ8,PLCE1,PPP1R14A,PPP1R3C,PRKD1,PRKD3,PRKG1
G-Protein Coupled Receptor Signaling	1.66	0.0699	NaN	ADCY4,ADORA2B,ADRA2B,AGTR1,DUSP1,DUSP6,GPR17,HTR2B,MAP3K8,P2RY12,PDE1A,PDE1C,PDE8A,PDE8B,RAP1GAP,RAPGEF3,RASD1,RGS16,RRAS
Remodeling of Epithelial Adherens Junctions	1.62	0.103	NaN	ACTA2,ACTG2,CDH1,CTNNA1,HGF,TUBB6,VCL
Synaptogenesis Signaling Pathway	1.62	0.0673	4.472	ADCY4,CDH1,CDH11,CDH15,CDH19,CDH5,COMP,EFNA1,EFNB1,EPHA2,EPHA3,EPHB4,NRXN3,RASD1,RELN,RRAS,THBS1,THBS2,THBS3,THBS4,YES1
TR/RXR Activation	1.6	0.0952	NaN	AKR1C3,COL6A3,DIO2,F10,KLF9,LDLR,NRGN,SREBF1
Role of PKR in Interferon Induction and Antiviral Response	1.58	0.0855	2.53	ATF3,FOS,HSPA1A/HSPA1B,JUN,PDGFB,PDGFC,PDGFD,PDGFRB,TLR3,TNFRSF1A
Sphingosine-1-phosphate Signaling	1.58	0.0855	2.333	ADCY4,PDGFB,PDGFC,PDGFD,PDGFRB,PLCE1,RHOB,RHOBTB1,RHOJ,SPHK1
BMP signaling pathway	1.57	0.0941	1.89	BMP4,BMP6,BMP8A,FST,JUN,RASD1,RRAS,SMAD7
Mechanisms of Viral Exit from Host Cells	1.55	0.122	NaN	ACTA2,ACTG2,NEDD4,PRKD1,PRKD3
Synaptic Long Term Depression	1.53	0.0741	3.606	GUCY1A1,GUCY1B1,IGF1,ITPR3,LCAT,NPR1,PLA2G4A,PLB1,PLCE1,PRKD1,PRKD3,PRKG1,RASD1,RRAS
Sonic Hedgehog Signaling	1.49	0.138	2	GLI1,GLI2,GLI3,SMO
Ubiquinol-10 Biosynthesis (Eukaryotic)	1.49	0.176	NaN	CYP26B1,CYP2E1,MICAL2
G Beta Gamma Signaling	1.47	0.082	3	CAV1,CAV2,EGFR,GNG11,GNG12,HBEGF,PRKD1,PRKD3,RASD1,RRAS
Oncostatin M Signaling	1.47	0.116	2	OSM,OSMR,RASD1,RRAS,TIMP3
Angiopoietin Signaling	1.41	0.0933	1.342	ANGPT1,ANGPTL1,GRB14,RASD1,RRAS,TEK,TIE1
Endocannabinoid Cancer Inhibition Pathway	1.4	0.0769	-2.111	ADCY4,ATF3,CDH1,PDGFC,PGF,SNAI2,TCF7L1,VEGFA,VEGFC,VEGFD,VIM
Xenobiotic Metabolism General Signaling Pathway	1.4	0.0769	3.317	MAF,MAP3K5,MAP3K6,MAP3K8,MGST1,NQO1,PPARA,PRKD1,PRKD3,RASD1,RRAS
Erythropoietin Signaling	1.39	0.0921	NaN	FOS,JUN,PRKD1,PRKD3,RASD1,RRAS,SOCS3
Superoxide Radicals Degradation	1.38	0.25	NaN	NQO1,SOD3
Methylthiopropionate Biosynthesis	1.38	1	NaN	ADI1
Methylglyoxal Degradation VI	1.38	1	NaN	LDHD
Antiproliferative Role of Somatostatin Receptor 2	1.36	0.0909	NaN	GNG11,GNG12,GUCY1A1,GUCY1B1,NPR1,RASD1,RRAS
Ethanol Degradation II	1.35	0.125	2	ADH1A,ADH1C,ALDH1A1,ALDH1A3
Role of Wnt/GSK-3Œ≤ Signaling in the Pathogenesis of Influenza	1.34	0.0897	2.449	FZD1,FZD2,FZD4,FZD7,SMO,TCF7L1,WNT11
Dendritic Cell Maturation	1.33	0.071	3.606	COL10A1,COL18A1,COL1A1,COL1A2,COL2A1,COL3A1,COL5A3,IL6,LTBR,NGFR,PLCE1,TLR3,TNFRSF1A
Ephrin A Signaling	1.33	0.106	NaN	EFNA1,EPHA2,EPHA3,NGEF,NGFR
Thrombopoietin Signaling	1.31	0.0952	2.236	FOS,JUN,PRKD1,PRKD3,RASD1,RRAS
The Visual Cycle	1.3	0.15	NaN	AKR1C3,DHRS3,RBP7
Fatty Acid Œ±-oxidation	1.3	0.15	NaN	ALDH1A1,ALDH1A3,PTGS2
Renal Cell Carcinoma Signaling	1.29	0.0875	2	FOS,HGF,JUN,PDGFB,RASD1,RRAS,VEGFA
JAK/Stat Signaling	1.29	0.0875	1.633	CEBPB,FOS,IL6,JUN,RASD1,RRAS,SOCS3
Putrescine Degradation III	1.25	0.143	NaN	ALDH1A1,ALDH1A3,SMOX
LPS-stimulated MAPK Signaling	1.24	0.0854	2.236	FOS,JUN,MAP3K5,PRKD1,PRKD3,RASD1,RRAS
Eicosanoid Signaling	1.23	0.0909	NaN	AKR1C3,LCAT,PLA2G4A,PLB1,PTGIS,PTGS2
cAMP-mediated signaling	1.22	0.0658	1.807	ADCY4,ADORA2B,ADRA2B,AGTR1,CREM,DUSP1,DUSP6,GPR17,P2RY12,PDE1A,PDE1C,PDE8A,PDE8B,RAP1GAP,RAPGEF3
Prostanoid Biosynthesis	1.2	0.2	NaN	PTGIS,PTGS2
Glycine Betaine Degradation	1.2	0.2	NaN	BHMT2,DMGDH
PI3K Signaling in B Lymphocytes	1.17	0.0725	2.828	ATF3,C3,CARD10,FOS,ITPR3,JUN,PLCE1,PLEKHA4,RASD1,RRAS
PI3K/AKT Signaling	1.17	0.0686	1.414	GHR,IL17RC,IL1R1,ITGA2,ITGA3,ITGA5,MAP3K5,MAP3K8,PTGS2,RASD1,RRAS,SYNJ2
UVB-Induced MAPK Signaling	1.17	0.0962	2.236	EGFR,FOS,JUN,PRKD1,PRKD3
Xenobiotic Metabolism AHR Signaling Pathway	1.17	0.0824	2.646	ABCG2,ALDH1A1,ALDH1A3,CYP1B1,IL6,MGST1,NQO1
Sumoylation Pathway	1.16	0.0777	0.378	AR,CDH1,FOS,JUN,MAP3K5,RHOB,RHOBTB1,RHOJ
Role of NFAT in Cardiac Hypertrophy	1.16	0.0654	3.464	ADCY4,GNG11,GNG12,IGF1,IL6,ITPR3,MEF2C,PLCE1,PRKD1,PRKD3,RASD1,RRAS,TGFB2,TGFB3
IL-10 Signaling	1.15	0.087	NaN	FOS,IL1R1,IL1RAPL1,IL6,JUN,SOCS3
SPINK1 General Cancer Pathway	1.15	0.087	0.447	EGFR,IL6,MT1E,MT1M,RASD1,RRAS
GŒ±q Signaling	1.15	0.0696	2.333	AGTR1,GNG11,GNG12,HTR2B,ITPR3,PRKD1,PRKD3,RGS16,RHOB,RHOBTB1,RHOJ
CD27 Signaling in Lymphocytes	1.14	0.0943	2	FOS,JUN,MAP3K5,MAP3K6,MAP3K8
Cardiac Œ≤-adrenergic Signaling	1.12	0.0709	0.707	ADCY4,GNG11,GNG12,PDE1A,PDE1C,PDE8A,PDE8B,PLN,PPP1R14A,PPP1R3C
HOTAIR Regulatory Pathway	1.12	0.0688	2.111	AR,CDH1,COL1A1,COL1A2,JAM2,MMP11,MMP19,SNAI2,TCF7L1,VIM,WNT11
Ceramide Signaling	1.11	0.0795	2.449	FOS,JUN,NGFR,RASD1,RRAS,SPHK1,TNFRSF1A
CCR3 Signaling in Eosinophils	1.1	0.0726	2	GNG11,GNG12,ITPR3,MYLK,PLA2G4A,PRKD1,PRKD3,RASD1,RRAS
Glycine Degradation (Creatine Biosynthesis)	1.08	0.5	NaN	GATM
ERK5 Signaling	1.08	0.0833	2.236	EGFR,FOS,MAP3K8,MEF2C,RASD1,RRAS
Bupropion Degradation	1.06	0.12	NaN	CYP1B1,CYP2E1,CYP2J2
Tryptophan Degradation X (Mammalian, via Tryptamine)	1.06	0.12	NaN	ALDH1A1,ALDH1A3,SMOX
Estrogen-Dependent Breast Cancer Signaling	1.04	0.0811	2.236	EGFR,FOS,IGF1,JUN,RASD1,RRAS
Estrogen Biosynthesis	1.03	0.0976	2	AKR1C3,CYP1B1,CYP2E1,CYP2J2
Synaptic Long Term Potentiation	1.02	0.0698	1.414	ITPR3,PLCE1,PPP1R14A,PPP1R3C,PRKD1,PRKD3,RAPGEF3,RASD1,RRAS
Reelin Signaling in Neurons	1.02	0.0698	3	APP,ITGA2,ITGA3,ITGA5,ITGB3,NDEL1,PDK4,RELN,YES1
TREM1 Signaling	1.02	0.08	2.449	CCL2,CXCL3,IL6,ITGA5,NOD1,TLR3
MIF Regulation of Innate Immunity	1	0.0952	2	FOS,JUN,PLA2G4A,PTGS2
Role of IL-17F in Allergic Inflammatory Airway Diseases	1	0.0952	NaN	CCL2,IGF1,IL17RC,IL6
Retinol Biosynthesis	1	0.0952	2	AKR1C3,DHRS3,LPL,RBP7
Rac Signaling	0.996	0.0714	2.646	CYFIP1,ITGA2,ITGA3,ITGA5,JUN,NOX4,RASD1,RRAS
GDNF Family Ligand-Receptor Interactions	0.996	0.0789	2	DOK5,FOS,ITPR3,JUN,RASD1,RRAS
Role of IL-17A in Psoriasis	0.991	0.154	NaN	CXCL3,IL17RC
mTOR Signaling	0.979	0.0622	2.236	DDIT4,PDGFC,PGF,PRKD1,PRKD3,RASD1,RHOB,RHOBTB1,RHOJ,RRAS,VEGFA,VEGFC,VEGFD
tRNA Splicing	0.975	0.093	2	PDE1A,PDE1C,PDE8A,PDE8B
Amyotrophic Lateral Sclerosis Signaling	0.939	0.0722	1.89	CAPN6,IGF1,PDGFC,PGF,VEGFA,VEGFC,VEGFD
Role of Pattern Recognition Receptors in Recognition of Bacteria and Viruses	0.936	0.0649	2.449	C3,IL6,NOD1,OSM,PRKD1,PRKD3,PTX3,TGFB2,TGFB3,TLR3
IL-3 Signaling	0.936	0.0759	2.236	FOS,JUN,PRKD1,PRKD3,RASD1,RRAS
fMLP Signaling in Neutrophils	0.932	0.069	2.449	GNG11,GNG12,ITPR3,NOX4,PRKD1,PRKD3,RASD1,RRAS
Glucocorticoid Receptor Signaling	0.921	0.0565	NaN	A2M,AGT,AR,CCL2,CEBPB,CXCL3,DUSP1,FOS,HSPA1A/HSPA1B,IL6,JUN,KRT18,PTGS2,RASD1,RRAS,SELE,SERPINE1,TGFB2,TGFB3
Uracil Degradation II (Reductive)	0.917	0.333	NaN	DPYS
Thyronamine and Iodothyronamine Metabolism	0.917	0.333	NaN	DIO2
D-glucuronate Degradation I	0.917	0.333	NaN	CRYL1
Methionine Salvage II (Mammalian)	0.917	0.333	NaN	BHMT2
Thymine Degradation	0.917	0.333	NaN	DPYS
Biotin-carboxyl Carrier Protein Assembly	0.917	0.333	NaN	ACACB
Thiosulfate Disproportionation III (Rhodanese)	0.917	0.333	NaN	TST
Thyroid Hormone Metabolism I (via Deiodination)	0.917	0.333	NaN	DIO2
Apelin Cardiomyocyte Signaling Pathway	0.907	0.0707	1.134	APLN,MYL9,MYLK,PLCE1,PLN,PRKD1,PRKD3
Airway Pathology in Chronic Obstructive Pulmonary Disease	0.9	0.0678	NaN	APOD,CCL2,CXCL3,IL6,OSM,RBP4,TGFB2,TGFB3
Dermatan Sulfate Biosynthesis (Late Stages)	0.893	0.087	2	CHST3,CHST7,DSE,UST
Dopamine Degradation	0.883	0.1	NaN	ALDH1A1,ALDH1A3,SMOX
nNOS Signaling in Neurons	0.87	0.0851	NaN	CAPN6,PRKD1,PRKD3,RASD1
Nicotine Degradation II	0.857	0.0769	2.236	AOX1,CYP1B1,CYP2E1,CYP2J2,FMO3
Acetone Degradation I (to Methylglyoxal)	0.851	0.0968	NaN	CYP1B1,CYP2E1,CYP2J2
Type II Diabetes Mellitus Signaling	0.836	0.0634	1.414	CD36,CEBPB,MAP3K5,NGFR,PPARG,PRKD1,PRKD3,SOCS3,TNFRSF1A
HIPPO signaling	0.827	0.0706	-1	LATS2,PPP1R14A,PPP1R3C,TEAD2,TEAD4,YAP1
ErbB4 Signaling	0.818	0.0746	NaN	PRKD1,PRKD3,RASD1,RRAS,YAP1
Serotonin Degradation	0.818	0.0746	2.236	ADH1A,ADH1C,ALDH1A1,ALDH1A3,SMOX
Retinoate Biosynthesis II	0.801	0.25	NaN	RBP7
Spermine and Spermidine Degradation I	0.801	0.25	NaN	SMOX
Phenylethylamine Degradation I	0.801	0.25	NaN	AOC3
Melatonin Degradation II	0.801	0.25	NaN	SMOX
D-myo-inositol (1,4,5)-trisphosphate Degradation	0.799	0.118	NaN	IMPA2,SYNJ2
Histamine Degradation	0.799	0.118	NaN	ALDH1A1,ALDH1A3
Opioid Signaling Pathway	0.793	0.0567	2.714	ADCY4,FOS,FOSB,GNG11,ITPR3,PDE1A,PDE1C,PRKD1,PRKD3,RASD1,RGS16,RRAS,SCN7A,YES1
RANK Signaling in Osteoclasts	0.777	0.0682	2.449	FOS,GSN,JUN,MAP3K5,MAP3K6,MAP3K8
Xenobiotic Metabolism CAR Signaling Pathway	0.767	0.0585	1.508	ALDH1A1,ALDH1A3,CHST3,CHST7,EGFR,FMO3,MGST1,PRKD1,PRKD3,SOD3,UST
Crosstalk between Dendritic Cells and Natural Killer Cells	0.762	0.0674	2	ACTA2,ACTG2,IL6,LTBR,NECTIN2,TLR3
Regulation of IL-2 Expression in Activated and Anergic T Lymphocytes	0.762	0.0674	NaN	FOS,JUN,RASD1,RRAS,TGFB2,TGFB3
Differential Regulation of Cytokine Production in Macrophages and T Helper Cells by IL-17A and IL-17F	0.759	0.111	NaN	CCL2,IL6
Coronavirus Pathogenesis Pathway	0.75	0.0604	2.333	AGT,AGTR1,CCL2,FOS,IL6,JUN,PTGS2,SERPINE1,STING1
IL-1 Signaling	0.73	0.0659	NaN	ADCY4,FOS,GNG11,GNG12,IL1R1,JUN
Th1 and Th2 Activation Pathway	0.73	0.0585	NaN	ACVR1,DLL4,IL6,JAG1,JUN,MAF,NFIL3,NOTCH1,SOCS3,TGFBR3
Systemic Lupus Erythematosus In B Cell Signaling Pathway	0.728	0.0545	3.357	FOS,IL6,JUN,OSM,PRKD1,PRKD3,RASD1,RASGRP3,RRAS,STING1,SYNJ2,TGFB2,TGFB3,TLR3,YES1
Xenobiotic Metabolism PXR Signaling Pathway	0.726	0.0573	2.111	ALDH1A1,ALDH1A3,CHST3,CHST7,MGST1,PPP1R14A,PPP1R3C,PRKD1,PRKD3,SMOX,UST
GADD45 Signaling	0.721	0.105	NaN	GADD45A,GADD45B
Methylglyoxal Degradation III	0.721	0.105	NaN	AKR1C3,CYP2E1
Oxidative Ethanol Degradation III	0.721	0.105	NaN	ALDH1A1,ALDH1A3
Role of IL-17A in Arthritis	0.717	0.0741	NaN	CCL2,CXCL3,IL17RC,PTGS2
Creatine-phosphate Biosynthesis	0.712	0.2	NaN	CKMT2
Serine Biosynthesis	0.712	0.2	NaN	PHGDH
Lysine Degradation II	0.712	0.2	NaN	AASS
Myo-inositol Biosynthesis	0.712	0.2	NaN	IMPA2
GPCR-Mediated Nutrient Sensing in Enteroendocrine Cells	0.712	0.0625	2.646	ADCY4,GNG11,GNG12,ITPR3,PLCE1,PRKD1,PRKD3
EGF Signaling	0.697	0.0727	2	EGFR,FOS,ITPR3,JUN
Gustation Pathway	0.693	0.0584	NaN	ADCY4,GNG11,ITPR3,P2RX7,P2RY12,PDE1A,PDE1C,PDE8A,PDE8B
FcŒ≥ Receptor-mediated Phagocytosis in Macrophages and Monocytes	0.688	0.0638	2.449	ACTA2,ACTG2,DOCK1,PRKD1,PRKD3,YES1
CCR5 Signaling in Macrophages	0.688	0.0638	2	FOS,GNG11,GNG12,JUN,PRKD1,PRKD3
Cardiomyocyte Differentiation via BMP Receptors	0.688	0.1	NaN	BMP4,MEF2C
T Cell Exhaustion Signaling Pathway	0.688	0.0571	1.89	ACVR1,FOS,IL6,JUN,KDR,PRDM1,RASD1,RRAS,TGFBR3,VEGFA
3-phosphoinositide Degradation	0.672	0.0577	2.828	ATP1A2,CILP,DUSP1,DUSP5,PPFIBP2,PPP1R14A,PTPN13,SOCS3,SYNJ2
Neuroprotective Role of THOP1 in Alzheimer's Disease	0.662	0.0603	0.816	AGT,APP,C1R,FAP,HTRA1,PRSS23,SERPINA3
D-myo-inositol-5-phosphate Metabolism	0.662	0.0573	2.828	ATP1A2,CILP,DUSP1,DUSP5,PLCE1,PPFIBP2,PPP1R14A,PTPN13,SOCS3
Necroptosis Signaling Pathway	0.662	0.0573	3	AXL,CAPN6,MERTK,NGFR,PELI1,PLA2G4A,PYGL,TLR3,TNFRSF1A
Nicotine Degradation III	0.66	0.0702	2	AOX1,CYP1B1,CYP2E1,CYP2J2
UDP-N-acetyl-D-glucosamine Biosynthesis II	0.642	0.167	NaN	FMO3
Cancer Drug Resistance By Drug Efflux	0.642	0.069	NaN	ABCG2,PTGS2,RASD1,RRAS
UVA-Induced MAPK Signaling	0.635	0.0612	NaN	EGFR,FOS,JUN,PLCE1,RASD1,RRAS
Dermatan Sulfate Biosynthesis	0.625	0.0678	2	CHST3,CHST7,DSE,UST
Apoptosis Signaling	0.622	0.0606	1.342	CAPN6,LMNA,MAP3K5,RASD1,RRAS,TNFRSF1A
Endometrial Cancer Signaling	0.609	0.0667	NaN	CDH1,CTNNA1,RASD1,RRAS
Chemokine Signaling	0.606	0.0625	2	CCL2,FOS,JUN,RASD1,RRAS
Sirtuin Signaling Pathway	0.606	0.0515	0.832	APP,CDH1,DUSP6,GABARAPL1,GADD45A,GADD45B,JUN,LDHD,NDRG1,NEDD4,NQO1,PPARA,PPARG,SOD3,SREBF1
D-myo-inositol (1,4,5,6)-Tetrakisphosphate Biosynthesis	0.602	0.0563	2.646	ATP1A2,CILP,DUSP1,DUSP5,PPFIBP2,PPP1R14A,PTPN13,SOCS3
D-myo-inositol (3,4,5,6)-tetrakisphosphate Biosynthesis	0.602	0.0563	2.646	ATP1A2,CILP,DUSP1,DUSP5,PPFIBP2,PPP1R14A,PTPN13,SOCS3
Neuropathic Pain Signaling In Dorsal Horn Neurons	0.597	0.0594	2.449	FOS,ITPR3,KCNN3,PLCE1,PRKD1,PRKD3
Superpathway of D-myo-inositol (1,4,5)-trisphosphate Metabolism	0.597	0.087	NaN	IMPA2,SYNJ2
Ethanol Degradation IV	0.597	0.087	NaN	ALDH1A1,ALDH1A3
Calcium Signaling	0.597	0.0534	NaN	ACTA2,ASPH,CASQ2,ITPR3,MEF2C,MYH11,MYH9,MYL9,TPM2,TRPC4,TRPC6
IL-2 Signaling	0.593	0.0656	NaN	FOS,JUN,RASD1,RRAS
B Cell Receptor Signaling	0.593	0.0541	2.333	CARD10,EGR1,JUN,MAP3K5,MAP3K6,MAP3K8,MEF2C,RASD1,RRAS,SYNJ2
Superpathway of Serine and Glycine Biosynthesis I	0.585	0.143	NaN	PHGDH
SAPK/JNK Signaling	0.585	0.0588	1.342	GADD45A,GNG11,JUN,MAP3K5,RASD1,RRAS
PEDF Signaling	0.578	0.061	2	PPARG,RASD1,RRAS,SERPINF1,TCF7L1
Apelin Adipocyte Signaling Pathway	0.578	0.061	-0.447	ADCY4,APLN,GPX3,MGST1,NOX4
Glutathione Redox Reactions I	0.57	0.0833	NaN	GPX3,MGST1
Serotonin Receptor Signaling	0.567	0.0698	NaN	ADCY4,HTR2B,SMOX
Phospholipases	0.547	0.0625	2	LCAT,PLA2G4A,PLB1,PLCE1
PD-1, PD-L1 cancer immunotherapy pathway	0.539	0.0566	NaN	LATS2,NGFR,TGFB2,TGFB3,TNFRSF1A,YAP1
Histidine Degradation III	0.536	0.125	NaN	AMDHD1
ErbB2-ErbB3 Signaling	0.533	0.0615	NaN	ERBB3,JUN,RASD1,RRAS
Superpathway of Melatonin Degradation	0.533	0.0615	2	CYP1B1,CYP2E1,CYP2J2,SMOX
Calcium-induced T Lymphocyte Apoptosis	0.519	0.0606	2	ITPR3,NR4A1,PRKD1,PRKD3
Role of Oct4 in Mammalian Embryonic Stem Cell Pluripotency	0.514	0.0652	NaN	ETS2,NR2F1,NR2F2
Superpathway of Inositol Phosphate Compounds	0.481	0.0503	3	ATP1A2,CILP,DUSP1,DUSP5,PLCE1,PPFIBP2,PPP1R14A,PTPN13,SOCS3,SYNJ2
Chondroitin Sulfate Biosynthesis (Late Stages)	0.481	0.0625	NaN	CHST3,CHST7,UST
NGF Signaling	0.457	0.0526	2.236	MAP3K5,MAP3K6,MAP3K8,NGFR,RASD1,RRAS
Androgen Signaling	0.456	0.0515	2	AR,GNG11,GNG12,JUN,PRKD1,PRKD3,TGFB1I1
Embryonic Stem Cell Differentiation into Cardiac Lineages	0.456	0.1	NaN	HOXB5
Calcium Transport I	0.456	0.1	NaN	ANXA5
Ketolysis	0.456	0.1	NaN	BDH2
Th2 Pathway	0.456	0.0515	0.816	ACVR1,JAG1,JUN,MAF,NOTCH1,SOCS3,TGFBR3
Heparan Sulfate Biosynthesis (Late Stages)	0.455	0.0563	2	CHST3,CHST7,EXTL1,UST
Melanoma Signaling	0.452	0.06	NaN	CDH1,RASD1,RRAS
TNFR1 Signaling	0.452	0.06	NaN	FOS,JUN,TNFRSF1A
Amyloid Processing	0.452	0.06	NaN	APP,BACE2,CAPN6
Endocannabinoid Developing Neuron Pathway	0.449	0.0522	-0.447	ADCY4,GNG11,MGLL,RAP1GAP,RASD1,RRAS
Ephrin B Signaling	0.442	0.0556	NaN	EFNB1,EPHB4,GNG11,GNG12
TNFR2 Signaling	0.44	0.0667	NaN	FOS,JUN
Non-Small Cell Lung Cancer Signaling	0.432	0.0548	NaN	EGFR,ITPR3,RASD1,RRAS
Fc Epsilon RI Signaling	0.429	0.0513	1.342	PLA2G4A,PRKD1,PRKD3,RASD1,RRAS,SYNJ2
GABA Receptor Signaling	0.429	0.0526	NaN	ADCY4,GABRA2,GABRE,KCNN3,SLC6A1
Ketogenesis	0.424	0.0909	NaN	BDH2
Œ≥-glutamyl Cycle	0.424	0.0909	NaN	OPLAH
Insulin Receptor Signaling	0.424	0.05	0.447	PPP1R14A,PPP1R3C,RASD1,RRAS,SOCS3,SYNJ2,TRIP10
G Protein Signaling Mediated by Tubby	0.423	0.0645	NaN	GNG11,GNG12
Hypoxia Signaling in the Cardiovascular System	0.42	0.0541	NaN	EDN1,JUN,NQO1,VEGFA
4-1BB Signaling in T Lymphocytes	0.406	0.0625	NaN	JUN,MAP3K5
p53 Signaling	0.401	0.051	NaN	GADD45A,GADD45B,JUN,SNAI2,THBS1
Transcriptional Regulatory Network in Embryonic Stem Cells	0.399	0.0556	NaN	FOXC1,GATA6,TCF7L1
Toll-like Receptor Signaling	0.399	0.0526	NaN	FOS,JUN,PPARA,TLR3
3-phosphoinositide Biosynthesis	0.397	0.0482	2.646	ATP1A2,CILP,DUSP1,DUSP5,PPFIBP2,PPP1R14A,PTPN13,SOCS3
Glucose and Glucose-1-phosphate Degradation	0.394	0.0833	NaN	RGN
Glycogen Degradation II	0.394	0.0833	NaN	PYGL
Dopamine Receptor Signaling	0.388	0.0519	NaN	ADCY4,PPP1R14A,PPP1R3C,SMOX
Heparan Sulfate Biosynthesis	0.379	0.0513	2	CHST3,CHST7,EXTL1,UST
Chondroitin Sulfate Biosynthesis	0.375	0.0536	NaN	CHST3,CHST7,UST
MIF-mediated Glucocorticoid Regulation	0.374	0.0588	NaN	PLA2G4A,PTGS2
Role of JAK2 in Hormone-like Cytokine Signaling	0.374	0.0588	NaN	GHR,SOCS3
Bile Acid Biosynthesis, Neutral Pathway	0.368	0.0769	NaN	AKR1C3
MSP-RON Signaling Pathway	0.353	0.0517	NaN	ACTA2,ACTG2,CCL2
Interferon Signaling	0.345	0.0556	NaN	IFITM2,IFITM3
Glycogen Degradation III	0.344	0.0714	NaN	PYGL
Phenylalanine Degradation IV (Mammalian, via Side Chain)	0.344	0.0714	NaN	SMOX
Semaphorin Signaling in Neurons	0.331	0.05	NaN	RHOB,RHOBTB1,RHOJ
Melatonin Degradation I	0.331	0.05	NaN	CYP1B1,CYP2E1,CYP2J2
SPINK1 Pancreatic Cancer Pathway	0.331	0.05	NaN	CPM,CPZ,F2RL1
Telomerase Signaling	0.326	0.0467	2	EGFR,ELK3,ETS2,RASD1,RRAS
GŒ±s Signaling	0.326	0.0467	2	ADCY4,ADORA2B,GNG11,GNG12,RAPGEF3
Induction of Apoptosis by HIV1	0.321	0.0492	NaN	MAP3K5,NGFR,TNFRSF1A
Autophagy	0.321	0.0492	NaN	CTSF,CTSO,WIPI1
Docosahexaenoic Acid (DHA) Signaling	0.319	0.0526	NaN	APP,SERPINF1
PKCŒ∏ Signaling in T Lymphocytes	0.318	0.0452	2.449	FOS,JUN,MAP3K5,MAP3K6,MAP3K8,RASD1,RRAS
Antioxidant Action of Vitamin C	0.312	0.0459	-2	LCAT,PLA2G4A,PLB1,PLCE1,SLC2A14
April Mediated Signaling	0.306	0.0513	NaN	FOS,JUN
Antiproliferative Role of TOB in T Cell Signaling	0.306	0.0513	NaN	TGFB2,TGFB3
Role of NFAT in Regulation of the Immune Response	0.305	0.0442	2	FOS,GNG11,GNG12,ITPR3,JUN,MEF2C,RASD1,RRAS
Androgen Biosynthesis	0.303	0.0625	NaN	AKR1C3
Type I Diabetes Mellitus Signaling	0.298	0.045	1.342	IL1R1,MAP3K5,NGFR,SOCS3,TNFRSF1A
CREB Signaling in Neurons	0.292	0.0435	2.449	ADCY4,GNG11,GNG12,ITPR3,PLCE1,PRKD1,PRKD3,RASD1,RRAS
IL-17A Signaling in Airway Cells	0.292	0.0469	NaN	CXCL3,IL17RC,IL6
Dermatan Sulfate Degradation (Metazoa)	0.285	0.0588	NaN	IDUA
PXR/RXR Activation	0.284	0.0462	NaN	ALDH1A1,IL6,PPARA
CD40 Signaling	0.284	0.0462	NaN	FOS,JUN,PTGS2
B Cell Activating Factor Signaling	0.284	0.0488	NaN	FOS,JUN
nNOS Signaling in Skeletal Muscle Cells	0.284	0.0488	NaN	DMD,SNTB1
1D-myo-inositol Hexakisphosphate Biosynthesis II (Mammalian)	0.268	0.0556	NaN	SYNJ2
D-myo-inositol (1,3,4)-trisphosphate Biosynthesis	0.268	0.0556	NaN	SYNJ2
Role of Hypercytokinemia/hyperchemokinemia in the Pathogenesis of Influenza	0.263	0.0465	NaN	CCL2,IL6
BAG2 Signaling Pathway	0.263	0.0465	NaN	ANXA2,HSPA1A/HSPA1B
Nur77 Signaling in T Lymphocytes	0.259	0.0441	NaN	NR4A1,PRKD1,PRKD3
Apelin Muscle Signaling Pathway	0.253	0.0526	NaN	APLN
Role of JAK1 and JAK3 in Œ≥c Cytokine Signaling	0.251	0.0435	NaN	RASD1,RRAS,SOCS3
Melanocyte Development and Pigmentation Signaling	0.249	0.0426	NaN	ADCY4,RASD1,RRAS,SOX10
iNOS Signaling	0.243	0.0444	NaN	FOS,JUN
Inflammasome pathway	0.238	0.05	NaN	P2RX7
PFKFB4 Signaling Pathway	0.234	0.0435	NaN	TGFB2,TGFB3
Triacylglycerol Degradation	0.225	0.0426	NaN	LPL,MGLL
Endoplasmic Reticulum Stress Pathway	0.225	0.0476	NaN	MAP3K5
Polyamine Regulation in Colon Cancer	0.213	0.0455	NaN	PPARG
Differential Regulation of Cytokine Production in Intestinal Epithelial Cells by IL-17A and IL-17F	0.201	0.0435	NaN	CCL2
Circadian Rhythm Signaling	0	0.0303	NaN	PER3
Huntington's Disease Signaling	0	0.038	2.646	CAPN6,EGFR,GNG11,GNG12,HSPA1A/HSPA1B,IGF1,JUN,PRKD1,PRKD3
Mitochondrial Dysfunction	0	0.0234	NaN	APP,BACE2,COX4I2,COX7A1
Role of BRCA1 in DNA Damage Response	0	0.0125	NaN	GADD45A
Activation of IRF by Cytosolic Pattern Recognition Receptors	0	0.0317	NaN	IL6,JUN
FcŒ≥RIIB Signaling in B Lymphocytes	0	0.0267	NaN	RASD1,RRAS
IL-22 Signaling	0	0.0417	NaN	SOCS3
Lymphotoxin Œ≤ Receptor Signaling	0	0.0189	NaN	LTBR
T Helper Cell Differentiation	0	0.0411	NaN	IL6,NGFR,TNFRSF1A
IL-9 Signaling	0	0.0303	NaN	SOCS3
CD28 Signaling in T Helper Cells	0	0.025	NaN	FOS,ITPR3,JUN
IL-15 Signaling	0	0.0267	NaN	RASD1,RRAS
Role of Cytokines in Mediating Communication between Immune Cells	0	0.0185	NaN	IL6
Melatonin Signaling	0	0.0417	NaN	PLCE1,PRKD1,PRKD3
CNTF Signaling	0	0.0351	NaN	RASD1,RRAS
iCOS-iCOSL Signaling in T Helper Cells	0	0.018	NaN	ITPR3,PLEKHA4
Cell Cycle Regulation by BTG Family Proteins	0	0.027	NaN	BTG2
Mitotic Roles of Polo-Like Kinase	0	0.0152	NaN	PLK2
Maturity Onset Diabetes of Young (MODY) Signaling	0	0.0339	NaN	APOC2,APOD
FLT3 Signaling in Hematopoietic Progenitor Cells	0	0.025	NaN	RASD1,RRAS
ATM Signaling	0	0.0309	NaN	GADD45A,GADD45B,JUN
Prostate Cancer Signaling	0	0.033	NaN	AR,RASD1,RRAS
Small Cell Lung Cancer Signaling	0	0.0141	NaN	PTGS2
Acute Myeloid Leukemia Signaling	0	0.0337	NaN	RASD1,RRAS,TCF7L1
Graft-versus-Host Disease Signaling	0	0.0208	NaN	IL6
Chronic Myeloid Leukemia Signaling	0	0.0388	NaN	RASD1,RRAS,TGFB2,TGFB3
Myc Mediated Apoptosis Signaling	0	0.04	NaN	NGFR,TNFRSF1A
Communication between Innate and Adaptive Immune Cells	0	0.0208	NaN	IL6,TLR3
Systemic Lupus Erythematosus Signaling	0	0.0349	NaN	BDKRB2,C6,CREM,FOS,IL6,JUN,RASD1,RRAS
Cdc42 Signaling	0	0.0419	1.89	FOS,ITGA2,ITGA3,ITGA5,JUN,MYL9,MYLK
EIF2 Signaling	0	0.0404	-0.447	ACTA2,ACTG2,ATF3,NOX4,PPP1R15A,RASD1,RRAS,SREBF1,VEGFA
AMPK Signaling	0	0.00935	NaN	ACACB,ADRA2B
Hereditary Breast Cancer Signaling	0	0.0286	NaN	GADD45A,GADD45B,RASD1,RRAS
Altered T Cell and B Cell Signaling in Rheumatoid Arthritis	0	0.0222	NaN	IL6,TLR3
Regulation of eIF4 and p70S6K Signaling	0	0.0321	2	ITGA2,ITGA3,ITGA5,RASD1,RRAS
Leptin Signaling in Obesity	0	0.0405	NaN	ADCY4,PLCE1,SOCS3
TWEAK Signaling	0	0.0286	NaN	TNFRSF12A
OX40 Signaling Pathway	0	0.0111	NaN	JUN
Cyclins and Cell Cycle Regulation	0	0.0247	NaN	TGFB2,TGFB3
Hematopoiesis from Pluripotent Stem Cells	0	0.0204	NaN	IL6
Netrin Signaling	0	0.0308	NaN	PRKG1,UNC5B
Thyroid Hormone Metabolism II (via Conjugation and/or Degradation)	0	0.0263	NaN	DIO2
Pyridoxal 5'-phosphate Salvage Pathway	0	0.0303	NaN	MAP3K6,MAP3K8
D-myo-inositol (1,4,5)-Trisphosphate Biosynthesis	0	0.04	NaN	PLCE1
Glutathione-mediated Detoxification	0	0.0312	NaN	MGST1
Triacylglycerol Biosynthesis	0	0.0238	NaN	PLPP3
Salvage Pathways of Pyrimidine Ribonucleotides	0	0.0204	NaN	MAP3K6,MAP3K8
Stearate Biosynthesis I (Animals)	0	0.0417	NaN	BDH2,CYP2E1
Superpathway of Methionine Degradation	0	0.027	NaN	BHMT2
Vitamin-C Transport	0	0.0417	NaN	STOM
Oxidative Phosphorylation	0	0.0183	NaN	COX4I2,COX7A1
Cell Cycle: G1/S Checkpoint Regulation	0	0.0299	NaN	TGFB2,TGFB3
Protein Ubiquitination Pathway	0	0.0403	NaN	DNAJB4,DNAJC1,HSPA12B,HSPA1A/HSPA1B,HSPB1,HSPB2,HSPB3,HSPB7,NEDD4,SMO,USP53
FGF Signaling	0	0.0357	NaN	FGFR1,HGF,MAP3K5
Cell Cycle: G2/M DNA Damage Checkpoint Regulation	0	0.0204	NaN	GADD45A
IL-4 Signaling	0	0.0353	NaN	RASD1,RRAS,SYNJ2
Phototransduction Pathway	0	0.0377	NaN	GUCY1A1,GUCY1B1
Glutamate Receptor Signaling	0	0.0351	NaN	GNG11,HOMER3
T Cell Receptor Signaling	0	0.0381	NaN	FOS,JUN,RASD1,RRAS
GPCR-Mediated Integration of Enteroendocrine Signaling Exemplified by an L Cell	0	0.0411	NaN	ADCY4,ITPR3,PLCE1
Phagosome Maturation	0	0.0265	NaN	CTSF,CTSO,NOX4,TUBB6
Th1 Pathway	0	0.0413	1.342	DLL4,IL6,NFIL3,NOTCH1,SOCS3
IL-7 Signaling Pathway	0	0.0256	NaN	HGF,JUN
Th17 Activation Pathway	0	0.033	NaN	IL1R1,IL6,SOCS3
Endocannabinoid Neuronal Synapse Pathway	0	0.0391	1	ADCY4,GNG11,MGLL,PLCE1,PTGS2
Apelin Pancreas Signaling Pathway	0	0.0227	NaN	APLN
IL-23 Signaling Pathway	0	0.0227	NaN	SOCS3
Systemic Lupus Erythematosus In T Cell Signaling Pathway	0	0.0389	0.832	CREM,FOS,GADD45A,IL6,JUN,MSN,RASD1,RDX,RHOB,RHOBTB1,RHOJ,RRAS,YES1
Inhibition of ARE-Mediated mRNA Degradation Pathway	0	0.0246	NaN	NGFR,TNFRSF1A,ZFP36
Insulin Secretion Signaling Pathway	0	0.0329	2.828	ADCY4,GHR,ITPR3,PLCE1,PRKD1,PRKD3,SLC2A14,YES1
Kinetochore Metaphase Signaling Pathway	0	0.0198	NaN	PPP1R14A,PPP1R3C
GM-CSF Signaling	0	0.0286	NaN	RASD1,RRAS

## Sheet: Canonical pathway-brown
¬© 2000-2020 QIAGEN. All rights reserved.
Ingenuity Canonical Pathways	-log(p-value)	Ratio	z-score	Molecules
Th1 and Th2 Activation Pathway	27.3	0.316	NaN	CCR1,CD247,CD28,CD3G,CD4,CD40,CD40LG,CD86,CD8A,CXCR3,CXCR4,CXCR6,GFI1,HAVCR2,HLA-DMA,HLA-DMB,HLA-DOB,HLA-DPA1,HLA-DPB1,HLA-DQB2,HLA-DRA,ICAM1,ICOS,IFNAR1,IFNG,IFNGR1,IFNGR2,IL10RA,IL10RB,IL18,IL18R1,IL27RA,IL2RA,IL2RB,IL4R,IL6R,IRF1,ITGB2,KLRC1,KLRD1,PIK3CD,PIK3CG,RUNX3,STAT3,STAT4,STAT5A,STAT6,TBX21,TGFB1,TGFBR2,TIMD4,TNFRSF4,TNFSF11,VAV1
Systemic Lupus Erythematosus In B Cell Signaling Pathway	25.5	0.24	6.155	BTK,CARD11,CCND2,CD19,CD22,CD40,CD40LG,CD5,CD70,CD72,CD79A,CD79B,FASLG,FCGR2A,FGR,FOXO1,HCK,IFIH1,IFIT2,IFIT3,IFNAR1,IFNAR2,IFNG,IFNGR1,IFNGR2,IL11,IL15,IL18,IL1B,IL6R,IL6ST,INPP5D,IRF5,IRF7,ISG15,LCK,LTB,LYN,MYC,PIK3AP1,PIK3CD,PIK3CG,PIM2,PLAAT4,PLCG2,PRKCD,PRKCH,PTPN6,RAC2,RALB,RAP1A,RASGRP1,RASGRP2,STAT3,SYK,TGFB1,TICAM1,TLR8,TNF,TNFSF10,TNFSF11,TNFSF13B,TNFSF14,TRAF1,TRAF5,VAV1
Th1 Pathway	22.2	0.339	5.014	CD247,CD28,CD3G,CD4,CD40,CD40LG,CD86,CD8A,CXCR3,HAVCR2,HLA-DMA,HLA-DMB,HLA-DOB,HLA-DPA1,HLA-DPB1,HLA-DQB2,HLA-DRA,ICAM1,ICOS,IFNAR1,IFNG,IFNGR1,IFNGR2,IL10RA,IL10RB,IL18,IL18R1,IL27RA,IL6R,IRF1,ITGB2,KLRC1,KLRD1,PIK3CD,PIK3CG,RUNX3,STAT3,STAT4,TBX21,TNFSF11,VAV1
T Helper Cell Differentiation	21.5	0.438	NaN	BCL6,CD28,CD40,CD40LG,CD86,FCER1G,HLA-DMA,HLA-DMB,HLA-DOB,HLA-DRA,ICOS,IFNG,IFNGR1,IFNGR2,IL10RA,IL10RB,IL18,IL18R1,IL21R,IL2RA,IL4R,IL6R,IL6ST,STAT3,STAT4,STAT6,TBX21,TGFB1,TGFBR2,TNF,TNFRSF11B,TNFRSF1B
Altered T Cell and B Cell Signaling in Rheumatoid Arthritis	21.3	0.389	NaN	CCL21,CD28,CD40,CD40LG,CD79A,CD79B,CD86,CXCL13,FAS,FASLG,FCER1G,HLA-DMA,HLA-DMB,HLA-DOB,HLA-DRA,IFNG,IL15,IL18,IL1B,IL1RN,IL23A,LTB,RELB,SLAMF1,SPP1,TGFB1,TLR1,TLR2,TLR4,TLR5,TLR8,TNF,TNFRSF17,TNFSF11,TNFSF13B
Role of Pattern Recognition Receptors in Recognition of Bacteria and Viruses	19.5	0.279	4.796	C1QA,C1QB,C1QC,C3AR1,C5AR1,CCL5,CD40LG,CD70,CLEC7A,DDX58,FASLG,IFIH1,IFNG,IL11,IL15,IL18,IL1B,IRF7,LTB,NLRC4,NLRP3,NOD2,OAS1,OAS2,OAS3,PIK3CD,PIK3CG,PLCG2,PRKCD,PRKCH,SYK,TGFB1,TICAM1,TLR1,TLR2,TLR4,TLR5,TLR8,TNF,TNFSF10,TNFSF11,TNFSF13B,TNFSF14
Neuroinflammation Signaling Pathway	19	0.201	6.532	AGER,B2M,BIRC2,BIRC3,CASP8,CCL5,CD40,CD86,CFLAR,CSF1R,CX3CR1,CXCL10,CXCL12,CYBB,FAS,FASLG,GABRA3,GLUL,HLA-DMA,HLA-DMB,HLA-DOB,HLA-DRA,HLA-E,HLA-F,HMOX1,ICAM1,IFNG,IFNGR1,IFNGR2,IKBKB,IKBKE,IL18,IL1B,IL6R,IRAK3,IRF7,KCNJ5,MMP9,NCF2,NLRP3,PIK3CD,PIK3CG,PLA2G2A,PLA2G4C,PLCG2,PYCARD,SLC1A3,SYK,TGFB1,TGFBR2,TICAM1,TLR1,TLR2,TLR4,TLR5,TLR8,TNF,TREM2,TYROBP,VCAM1
Dendritic Cell Maturation	18.8	0.251	6.481	B2M,CCR7,CD1A,CD1B,CD1C,CD1D,CD40,CD40LG,CD58,CD86,FCER1G,FCGR2A,FCGR3A/FCGR3B,HLA-DMA,HLA-DMB,HLA-DOB,HLA-DRA,HLA-E,HLA-F,ICAM1,IFNAR1,IKBKB,IKBKE,IL15,IL18,IL1B,IL1RN,IL23A,IL32,IRF8,LTB,NFKBIA,NFKBIE,PIK3CD,PIK3CG,PLCD1,PLCG2,RELB,STAT4,TLR2,TLR4,TNF,TNFRSF11B,TNFRSF1B,TREM2,TYROBP
Natural Killer Cell Signaling	18.2	0.239	4.423	B2M,CD247,CD48,FASLG,FCER1G,FCGR2A,FCGR3A/FCGR3B,HCST,HLA-E,HLA-F,HSPA2,HSPA6,IFNG,IL15,IL18,IL18R1,IL18RAP,IL2RB,ITGAL,KLRB1,KLRC1,KLRD1,LAIR1,LCK,LCP2,LILRB1,MICB,NCR1,NCR3,PIK3CD,PIK3CG,PLCG2,PTK2B,PTPN6,RAC2,RALB,RAP1A,SIGLEC7,STAT4,SYK,TNFSF10,TYROBP,VAV1,VAV3,WAS,WIPF1,ZAP70
T Cell Exhaustion Signaling Pathway	17.2	0.246	1.768	BATF,BCL6,BTLA,CD28,CD86,CTLA4,EOMES,FCER1G,FOXO1,GZMB,HAVCR2,HLA-DMA,HLA-DMB,HLA-DOB,HLA-DPA1,HLA-DPB1,HLA-DQB2,HLA-DRA,HLA-E,HLA-F,IFNAR1,IFNAR2,IFNG,IL10RA,IL10RB,IL6R,IRF4,LAG3,PIK3CD,PIK3CG,PLCG2,PPM1J,PTPN6,RALB,RAP1A,SMAD3,STAT3,STAT4,TBX21,TCF7,TGFB1,TGFBR2,ZAP70
Tec Kinase Signaling	16.7	0.25	5.657	BLK,BTK,FAS,FASLG,FCER1A,FCER1G,FGR,GNAI2,GNB4,GNG5,GNG7,HCK,ITGA4,ITK,LCK,LYN,PIK3CD,PIK3CG,PLCG2,PRKCD,PRKCH,PTK2B,RAC2,RHOC,RHOG,RHOH,RND1,STAT3,STAT4,STAT5A,STAT6,TLR4,TNF,TNFRSF10A,TNFRSF10B,TNFRSF21,TNFSF10,TXK,VAV1,VAV3,WAS
Granulocyte Adhesion and Diapedesis	16.7	0.239	NaN	C5AR1,CCL11,CCL13,CCL18,CCL19,CCL21,CCL26,CCL5,CCL8,CLDN23,CXCL1,CXCL10,CXCL11,CXCL12,CXCL13,CXCL14,CXCL9,CXCR4,FPR1,GNAI2,ICAM1,ICAM2,IL18,IL18RAP,IL1B,IL1R2,IL1RN,ITGA4,ITGAL,ITGAM,ITGB2,MMP1,MMP12,MMP25,MMP9,SDC4,SELL,SELP,SELPLG,TNF,TNFRSF11B,TNFRSF1B,VCAM1
Role of Macrophages, Fibroblasts and Endothelial Cells in Rheumatoid Arthritis	16.1	0.183	NaN	C5AR1,CCL5,CEBPA,CXCL12,FCGR3A/FCGR3B,FZD10,FZD6,ICAM1,IKBKB,IKBKE,IL15,IL16,IL18,IL18R1,IL18RAP,IL1B,IL1R2,IL1RN,IL32,IL6R,IL6ST,IL7,IRAK3,LEF1,LTB,MMP1,MYC,NFKBIA,NFKBIE,PIK3CD,PIK3CG,PLCD1,PLCG2,PRKCD,PRKCH,RALB,RAP1A,STAT3,TCF3,TCF7,TGFB1,TLR1,TLR2,TLR4,TLR5,TLR8,TNF,TNFRSF11B,TNFRSF1B,TNFSF11,TNFSF13B,TRADD,TRAF1,TRAF5,VCAM1,WNT10A,WNT5A
Th2 Pathway	15.6	0.265	2.711	CCR1,CD247,CD28,CD3G,CD4,CD40,CD86,CXCR4,CXCR6,GFI1,HLA-DMA,HLA-DMB,HLA-DOB,HLA-DPA1,HLA-DPB1,HLA-DQB2,HLA-DRA,ICAM1,ICOS,IFNG,IL2RA,IL2RB,IL4R,ITGB2,PIK3CD,PIK3CG,RUNX3,STAT4,STAT5A,STAT6,TBX21,TGFB1,TGFBR2,TIMD4,TNFRSF4,VAV1
Crosstalk between Dendritic Cells and Natural Killer Cells	15.3	0.326	5.292	CCR7,CD209,CD28,CD40,CD40LG,CD69,CD86,FAS,FASLG,HLA-DRA,HLA-E,HLA-F,ICAM3,IFNG,IL15,IL18,IL2RB,ITGAL,KLRD1,LTB,MICB,NCR3,PRF1,TLR4,TNF,TNFRSF1B,TNFSF10,TREM2,TYROBP
Leukocyte Extravasation Signaling	15.2	0.218	4.323	ACTN1,ARHGAP4,ARHGAP9,BTK,CLDN23,CXCL12,CXCR4,CYBA,CYBB,GNAI2,ICAM1,ICAM3,ITGA4,ITGAL,ITGAM,ITGB2,ITK,MMP1,MMP12,MMP25,MMP9,NCF2,NCF4,PIK3CD,PIK3CG,PLCG2,PRKCD,PRKCH,PTK2B,RAC2,RAP1A,RASGRP1,RHOH,SELPLG,SIPA1,TIMP2,TXK,VASP,VAV1,VAV3,VCAM1,WAS,WIPF1
iCOS-iCOSL Signaling in T Helper Cells	15.1	0.288	4.379	CD247,CD28,CD3G,CD4,CD40,CD40LG,CD86,FCER1G,GRAP2,HLA-DMA,HLA-DMB,HLA-DOB,HLA-DRA,ICOS,IKBKB,IKBKE,IL2RA,IL2RB,INPP5D,ITK,ITPR1,ITPR2,LCK,LCP2,NFKBIA,NFKBIE,PIK3CD,PIK3CG,PTPRC,TRAT1,VAV1,ZAP70
TREM1 Signaling	14.6	0.347	4.707	CASP5,CD40,CD86,CIITA,ICAM1,IL18,IL1B,ITGAX,MPO,NLRC4,NLRC5,NLRP2,NLRP3,NOD2,PLCG2,SIGIRR,STAT3,STAT5A,TLR1,TLR2,TLR4,TLR5,TLR8,TNF,TREM1,TYROBP
Communication between Innate and Adaptive Immune Cells	14.4	0.302	NaN	B2M,CCL5,CCR7,CD28,CD4,CD40,CD40LG,CD79A,CD79B,CD86,CD8A,CXCL10,FCER1G,HLA-DRA,HLA-E,HLA-F,IFNG,IL15,IL18,IL1B,IL1RN,TLR1,TLR2,TLR4,TLR5,TLR8,TNF,TNFRSF17,TNFSF13B
Atherosclerosis Signaling	14.1	0.26	NaN	ALOX15B,ALOX5,APOE,APOL1,CCL11,CCR2,CD40,CD40LG,CLU,CXCL12,CXCR4,ICAM1,IFNG,IL18,IL1B,IL1RN,ITGA4,ITGB2,LYZ,MMP1,MMP9,MSR1,PLA2G2A,PLA2G4C,PLA2G7,PLAAT4,S100A8,SELP,SELPLG,TGFB1,TNF,TNFSF14,VCAM1
PD-1, PD-L1 cancer immunotherapy pathway	14	0.283	-2.353	B2M,CD247,CD28,HLA-DMA,HLA-DMB,HLA-DOB,HLA-DPA1,HLA-DPB1,HLA-DQB2,HLA-DRA,HLA-E,HLA-F,IFNG,IFNGR1,IFNGR2,IL2RA,IL2RB,LCK,LCP2,MR1,PIK3CD,PIK3CG,RASGRP1,SMAD3,STAT5A,TGFB1,TNF,TNFRSF11B,TNFRSF1B,ZAP70
NF-Œ∫B Signaling	13.1	0.212	4.867	BMP2,CARD11,CASP8,CD40,CD40LG,FCER1G,IKBKB,IL18,IL1B,IL1R2,IL1RN,IRAK3,LCK,NFKBIA,NFKBIE,PIK3CD,PIK3CG,PLCG2,RALB,RAP1A,RELB,SIGIRR,TGFBR2,TLR1,TLR2,TLR4,TLR5,TLR8,TNF,TNFAIP3,TNFRSF11B,TNFRSF17,TNFRSF1B,TNFSF11,TNFSF13B,TRADD,TRAF5,ZAP70
Role of NFAT in Regulation of the Immune Response	12.9	0.21	5.209	BTK,CD247,CD28,CD3G,CD4,CD79A,CD79B,CD86,FCER1A,FCER1G,FCGR2A,FCGR3A/FCGR3B,GNAI2,GNB4,GNG5,GNG7,HLA-DMA,HLA-DMB,HLA-DOB,HLA-DRA,IKBKB,IKBKE,ITK,ITPR1,ITPR2,LCK,LCP2,LYN,NFKBIA,NFKBIE,PIK3CD,PIK3CG,PLCG2,RALB,RAP1A,RCAN3,SYK,ZAP70
Antigen Presentation Pathway	12.8	0.462	NaN	B2M,CD74,CIITA,HLA-DMA,HLA-DMB,HLA-DOB,HLA-DPA1,HLA-DPB1,HLA-DQB2,HLA-DRA,HLA-E,HLA-F,IFNG,MR1,NLRC5,PSMB8,PSMB9,TAP1
Phagosome Formation	12.7	0.248	NaN	C3AR1,C5AR1,CLEC7A,CR2,FCER1A,FCER1G,FCGR2A,FCGR3A/FCGR3B,ITGA4,ITGAM,ITGAX,ITGB2,MARCO,MSR1,PIK3CD,PIK3CG,PLCD1,PLCG2,PRKCD,PRKCH,RAC2,RHOC,RHOG,RHOH,RND1,SYK,TLR1,TLR2,TLR4,TLR5,TLR8
Agranulocyte Adhesion and Diapedesis	12.7	0.202	NaN	C5AR1,CCL11,CCL13,CCL18,CCL19,CCL21,CCL26,CCL5,CCL8,CLDN23,CXCL1,CXCL10,CXCL11,CXCL12,CXCL13,CXCL14,CXCL9,CXCR4,GNAI2,ICAM1,ICAM2,IL18,IL1B,IL1RN,ITGA4,ITGB2,ITGB7,MADCAM1,MMP1,MMP12,MMP25,MMP9,MYL5,SDC4,SELL,SELP,SELPLG,TNF,VCAM1
Type I Diabetes Mellitus Signaling	12.5	0.261	4.472	CASP8,CD247,CD28,CD3G,CD86,FAS,FASLG,FCER1G,GZMB,HLA-DMA,HLA-DMB,HLA-DOB,HLA-DRA,HLA-E,HLA-F,IFNG,IFNGR1,IFNGR2,IKBKB,IKBKE,IL1B,IRF1,NFKBIA,NFKBIE,PRF1,TNF,TNFRSF11B,TNFRSF1B,TRADD
Hepatic Fibrosis / Hepatic Stellate Cell Activation	12.5	0.204	NaN	CCL21,CCL5,CCR7,CD14,CD40,CD40LG,COL4A4,COL8A2,CXCL9,CXCR3,FAS,FASLG,ICAM1,IFNAR1,IFNAR2,IFNG,IFNGR1,IFNGR2,IL10RA,IL18RAP,IL1B,IL1R2,IL4R,IL6R,LHX2,LY96,MMP1,MMP9,MYL5,SMAD3,TGFB1,TGFBR2,TIMP2,TLR4,TNF,TNFRSF11B,TNFRSF1B,VCAM1
CD28 Signaling in T Helper Cells	12.4	0.25	3.71	CARD11,CD247,CD28,CD3G,CD4,CD86,CTLA4,FCER1G,GRAP2,HLA-DMA,HLA-DMB,HLA-DOB,HLA-DRA,IKBKB,IKBKE,ITK,ITPR1,ITPR2,LCK,LCP2,NFKBIA,NFKBIE,PIK3CD,PIK3CG,PTPN6,PTPRC,SYK,VAV1,WAS,ZAP70
Production of Nitric Oxide and Reactive Oxygen Species in Macrophages	12.4	0.202	5.048	APOE,APOL1,CLU,CYBA,CYBB,IFNG,IFNGR1,IFNGR2,IKBKB,IKBKE,IRF1,IRF8,LYZ,MPO,NCF2,NCF4,NFKBIA,NFKBIE,PIK3CD,PIK3CG,PLCG2,PPM1J,PPP1R14C,PRKCD,PRKCH,PTPN6,RAC2,RAP1A,RHOC,RHOG,RHOH,RND1,S100A8,TLR2,TLR4,TNF,TNFRSF11B,TNFRSF1B
Cardiac Hypertrophy Signaling (Enhanced)	12	0.136	7.55	ADRA1B,ADRA2A,ATP2A3,CD40LG,CD70,CYBB,FASLG,FGF7,FZD10,FZD6,GNAI2,GNG5,GNG7,IFNAR1,IFNG,IKBKB,IKBKE,IL10RA,IL10RB,IL11,IL13RA1,IL15,IL18,IL18R1,IL18RAP,IL1B,IL1R2,IL21R,IL27RA,IL2RA,IL2RB,IL4R,IL6R,IL6ST,IL7R,ITGA4,ITPR1,ITPR2,LTB,MKNK2,MYC,PDE4A,PDE4B,PDE6G,PDE7B,PIK3CD,PIK3CG,PLCD1,PLCG2,PRKCD,PRKCH,RALB,RAP1A,SMPDL3A,STAT3,TGFB1,TGFBR2,TNF,TNFRSF11B,TNFRSF1B,TNFSF10,TNFSF11,TNFSF13B,TNFSF14,WN…
Death Receptor Signaling	11.4	0.275	3	ARHGDIB,BIRC2,BIRC3,CASP10,CASP6,CASP7,CASP8,CFLAR,FAS,FASLG,IKBKB,IKBKE,NFKBIA,NFKBIE,PARP12,PARP15,PARP4,PARP9,TNF,TNFRSF10A,TNFRSF10B,TNFRSF1B,TNFRSF21,TNFSF10,TRADD
Hepatic Fibrosis Signaling Pathway	11.3	0.147	6.102	CCL5,CD40,CD40LG,CYBB,FOXO1,FTL,FZD10,FZD6,GNAI2,ICAM1,IKBKB,IKBKE,IL18,IL18RAP,IL1B,IL1R2,IL1RN,IRAK3,ITGA4,LEF1,MMP1,MYC,MYL5,NCF2,NFKBIA,NFKBIE,PIK3CD,PIK3CG,PLCG2,PRKCD,PRKCH,RAC2,RALB,RAP1A,RHOC,RHOG,RHOH,RND1,SMAD3,SPP1,STAT3,SUCNR1,TCF3,TCF7,TGFB1,TGFBR2,TLR4,TNF,TNFRSF11B,TNFRSF1B,TRADD,VCAM1,WNT10A,WNT5A
Interferon Signaling	11.2	0.444	4	IFI35,IFI6,IFIT1,IFIT3,IFITM1,IFNAR1,IFNAR2,IFNG,IFNGR1,IFNGR2,IRF1,ISG15,MX1,OAS1,PSMB8,TAP1
Graft-versus-Host Disease Signaling	10.9	0.375	NaN	CD28,CD86,FAS,FASLG,FCER1G,GZMB,HLA-DMA,HLA-DMB,HLA-DOB,HLA-DRA,HLA-E,HLA-F,IFNG,IL18,IL1B,IL1RN,PRF1,TNF
Role of Osteoblasts, Osteoclasts and Chondrocytes in Rheumatoid Arthritis	10.8	0.177	NaN	ACP5,BIRC2,BIRC3,BMP2,CSF1R,CTSK,FOXO1,FZD10,FZD6,IFNG,IKBKB,IKBKE,IL11,IL18,IL18R1,IL18RAP,IL1B,IL1R2,IL1RN,IL7,LEF1,MMP1,NFKBIA,NFKBIE,PIK3CD,PIK3CG,PTK2B,SPP1,TCF3,TCF7,TGFB1,TNF,TNFRSF11B,TNFRSF1B,TNFSF11,TRADD,TRAF5,WNT10A,WNT5A
T Cell Receptor Signaling	10.7	0.248	NaN	BTK,CARD11,CD247,CD28,CD3G,CD4,CD8A,CTLA4,GRAP2,IKBKB,IKBKE,ITK,LCK,LCP2,NFKBIA,PIK3CD,PIK3CG,PTPN7,PTPRC,RALB,RAP1A,RASGRP1,TXK,VAV1,VAV3,ZAP70
PI3K Signaling in B Lymphocytes	10.7	0.217	4.914	ATF5,BLK,BTK,CD19,CD40,CD79A,CD79B,CR2,DAPP1,IKBKB,IKBKE,IL4R,INPP5D,ITPR1,ITPR2,LYN,NFKBIA,NFKBIE,PIK3AP1,PIK3CD,PIK3CG,PLCD1,PLCG2,PTPRC,RALB,RAP1A,SYK,TLR4,VAV1,VAV3
Role of PKR in Interferon Induction and Antiviral Response	10.4	0.231	2.985	CASP5,CASP8,COLEC12,DDX58,FAS,FASLG,HSPA2,HSPA6,IFIH1,IFNAR1,IFNAR2,IFNG,IFNGR1,IFNGR2,IKBKB,IKBKE,IL18,IL1B,IRF1,MARCO,MSR1,NFKBIA,NFKBIE,PYCARD,STAT3,TLR4,TNF
IL-8 Signaling	10.2	0.18	5.745	ANGPT2,CCND2,CR2,CSTB,CXCL1,CYBB,GNAI2,GNB4,GNG5,GNG7,HMOX1,ICAM1,IKBKB,IKBKE,IQGAP1,IRAK3,ITGAM,ITGAX,ITGB2,MMP9,MPO,NCF2,PIK3CD,PIK3CG,PRKCD,PRKCH,PTK2B,RAC2,RALB,RAP1A,RHOC,RHOG,RHOH,RND1,VASP,VCAM1
Colorectal Cancer Metastasis Signaling	10.1	0.162	5.488	ARRB1,FZD10,FZD6,GNB4,GNG5,GNG7,IFNG,IFNGR1,IL6R,IL6ST,LEF1,MMP1,MMP12,MMP25,MMP9,MYC,PIK3CD,PIK3CG,PTGER2,PTGER4,RAC2,RALB,RAP1A,RHOC,RHOG,RHOH,RND1,SMAD3,STAT3,TCF3,TCF7,TGFB1,TGFBR2,TLR1,TLR2,TLR4,TLR5,TLR8,TNF,WNT10A,WNT5A
HMGB1 Signaling	10	0.194	4.472	AGER,CD40LG,CD70,FASLG,ICAM1,IFNG,IFNGR1,IFNGR2,IL11,IL15,IL18,IL1B,LTB,PIK3CD,PIK3CG,RAC2,RALB,RAP1A,RHOC,RHOG,RHOH,RND1,TGFB1,TLR4,TNF,TNFRSF11B,TNFRSF1B,TNFSF10,TNFSF11,TNFSF13B,TNFSF14,VCAM1
Hepatic Cholestasis	9.95	0.184	NaN	ABCC3,CD14,CD40LG,CD70,CETP,CYP27A1,FASLG,IFNG,IKBKB,IKBKE,IL11,IL15,IL18,IL18RAP,IL1B,IL1R2,IL1RN,IRAK3,LTB,LY96,NFKBIA,NFKBIE,NR1H3,PRKCD,PRKCH,TGFB1,TLR4,TNF,TNFRSF11B,TNFRSF1B,TNFSF10,TNFSF11,TNFSF13B,TNFSF14
Airway Pathology in Chronic Obstructive Pulmonary Disease	9.53	0.22	NaN	CD40LG,CD70,CTSG,CXCL1,FASLG,FGF7,GZMB,IFNG,IL11,IL15,IL18,IL1B,IL23A,LCN2,LTB,MMP1,MMP9,MPO,PRF1,PTGDS,TGFB1,TNF,TNFSF10,TNFSF11,TNFSF13B,TNFSF14
Phospholipase C Signaling	9.29	0.156	4.849	ARHGEF19,ARHGEF2,ARHGEF3,ARHGEF6,BTK,CD247,CD3G,CD79A,CD79B,FCER1G,FCGR2A,GNB4,GNG5,GNG7,GRAP2,HMOX1,ITGA4,ITK,ITPR1,ITPR2,LCK,LCP2,LYN,MYL5,PLA2G2A,PLA2G4C,PLCD1,PLCG2,PRKCD,PRKCH,RAC2,RALB,RAP1A,RHOC,RHOG,RHOH,RND1,SYK,TGM2,ZAP70
CTLA4 Signaling in Cytotoxic T Lymphocytes	9.18	0.247	NaN	AP1G2,B2M,CD247,CD28,CD3G,CD86,CD8A,CTLA4,FCER1G,GRAP2,HLA-E,HLA-F,LCK,LCP2,PIK3CD,PIK3CG,PPM1J,PTPN22,PTPN6,SYK,TRAT1,ZAP70
Inflammasome pathway	9.11	0.55	3.317	AIM2,CASP5,CASP8,CTSB,IL18,IL1B,NLRC4,NLRP3,NOD2,PYCARD,TLR4
IL-10 Signaling	8.87	0.275	NaN	BLVRB,CCR1,CD14,FCGR2A,HMOX1,IKBKB,IKBKE,IL10RA,IL10RB,IL18,IL18RAP,IL1B,IL1R2,IL1RN,IL4R,NFKBIA,NFKBIE,STAT3,TNF
B Cell Receptor Signaling	8.71	0.173	3.9	APBB1IP,BCL2A1,BCL6,BTK,CD19,CD22,CD79A,CD79B,DAPP1,ETS1,FCGR2A,FOXO1,IKBKB,IKBKE,INPP5D,LYN,NFKBIA,NFKBIE,PIK3AP1,PIK3CD,PIK3CG,PLCG2,PTK2B,PTPN6,PTPRC,RAC2,RALB,RAP1A,SYK,TCF3,VAV1,VAV3
Allograft Rejection Signaling	8.69	0.244	NaN	B2M,CD28,CD40,CD40LG,CD86,FAS,FASLG,FCER1G,GZMB,HLA-DMA,HLA-DMB,HLA-DOB,HLA-DPA1,HLA-DPB1,HLA-DQB2,HLA-DRA,HLA-E,HLA-F,IFNG,PRF1,TNF
Primary Immunodeficiency Signaling	8.62	0.32	NaN	ADA,BTK,CD19,CD4,CD40,CD40LG,CD79A,CD8A,CIITA,ICOS,IGLL1/IGLL5,IL7R,LCK,PTPRC,TAP1,ZAP70
IL-12 Signaling and Production in Macrophages	8.42	0.197	NaN	APOE,APOL1,CD40,CD40LG,CLU,IFNG,IFNGR1,IKBKB,IKBKE,IL18,IL23A,IRF1,IRF8,LYZ,PIK3CD,PIK3CG,PRKCD,PRKCH,REL,S100A8,STAT4,STAT6,TGFB1,TLR2,TLR4,TNF
Systemic Lupus Erythematosus In T Cell Signaling Pathway	8.31	0.135	4.422	B2M,BCL6,CASP10,CASP5,CASP6,CASP7,CASP8,CD247,CD28,CD3G,CD40LG,CD70,CD86,FAS,FASLG,FCER1G,GNAI2,HLA-DMA,HLA-DMB,HLA-DOB,HLA-DPA1,HLA-DPB1,HLA-DQB2,HLA-DRA,HLA-E,HLA-F,ICOS,IL23A,IRF4,ITGAL,ITPR1,PIK3CD,PIK3CG,PPM1J,RAC2,RALB,RAP1A,RHOC,RHOG,RHOH,RND1,SELPLG,STAT3,SYK,VAV1
Cytotoxic T Lymphocyte-mediated Apoptosis of Target Cells	8.2	0.382	3.162	B2M,CASP6,CASP7,CASP8,CD247,CD3G,FAS,FASLG,FCER1G,GZMB,HLA-E,HLA-F,PRF1
PKCŒ∏ Signaling in T Lymphocytes	8.14	0.181	5.196	CACNA2D4,CARD11,CD247,CD28,CD3G,CD4,CD86,FCER1G,GRAP2,HLA-DMA,HLA-DMB,HLA-DOB,HLA-DRA,IKBKB,IKBKE,LCK,LCP2,NFKBIA,NFKBIE,PIK3CD,PIK3CG,PLCG2,RAC2,RALB,RAP1A,VAV1,VAV3,ZAP70
Tumoricidal Function of Hepatic Natural Killer Cells	8.02	0.458	2.333	CASP6,CASP7,CASP8,FAS,FASLG,GZMB,ICAM1,ITGAL,PRF1,SERPINB9,SRGN
B Cell Development	7.84	0.361	NaN	CD19,CD40,CD79A,CD79B,CD86,DNTT,HLA-DMA,HLA-DMB,HLA-DOB,HLA-DRA,IL7,IL7R,PTPRC
Autoimmune Thyroid Disease Signaling	7.83	0.306	NaN	CD28,CD40,CD40LG,CD86,FAS,FASLG,FCER1G,GZMB,HLA-DMA,HLA-DMB,HLA-DOB,HLA-DRA,HLA-E,HLA-F,PRF1
Complement System	7.68	0.351	1.89	C1QA,C1QB,C1QC,C2,C3AR1,C5AR1,C7,CD55,CFD,CR2,ITGAM,ITGAX,ITGB2
Necroptosis Signaling Pathway	7.4	0.172	4.811	BIRC2,BIRC3,CASP10,CASP8,CFLAR,CYBB,FAS,FASLG,GLUL,IFNAR1,IKBKB,MLKL,NLRP3,PLA2G2A,PLA2G4C,PYCARD,RIPK3,TICAM1,TLR4,TNF,TNFRSF10A,TNFRSF10B,TNFRSF11B,TNFRSF1B,TNFSF10,TRADD,TSPO
Regulation Of The Epithelial Mesenchymal Transition By Growth Factors Pathway	7.38	0.16	5.014	CD40LG,CD70,ETS1,FASLG,FGF7,FOXO1,GSC,ID2,IKBKB,IKBKE,IL6R,LTB,MMP1,MMP9,PIK3CD,PIK3CG,RALB,RAP1A,SMAD3,STAT3,TCF3,TGFB1,TGFBR2,TNF,TNFRSF11B,TNFRSF1B,TNFSF10,TNFSF11,TNFSF13B,TNFSF14
Toll-like Receptor Signaling	7.32	0.237	2.673	CD14,IKBKB,IL18,IL1B,IL1RN,IRAK3,LY96,NFKBIA,SIGIRR,TICAM1,TLR1,TLR2,TLR4,TLR5,TLR8,TNF,TNFAIP3,TRAF1
Breast Cancer Regulation by Stathmin1	7.26	0.107	NaN	ADGRE1,ADGRE3,ADGRE5,ADGRG2,ADGRG5,ADORA3,ADRA1B,ADRA2A,ARHGEF19,ARHGEF2,ARHGEF3,ARHGEF6,C3AR1,C5AR1,CCND2,CCR1,CCR2,CCR6,CCR7,CELSR1,CMKLR1,CNR2,CX3CR1,CXCR6,FPR1,FZD10,FZD6,GNB4,GNG5,GNG7,GPR108,GPR137B,GPR160,GPR171,GPR18,GPR34,GPR65,GPRC5B,HTR2A,HTR7,MMP9,NPY1R,P2RY10,P2RY13,P2RY14,P2RY6,PIK3CD,PIK3CG,PPM1J,PPP1R14C,PRKCD,PRKCH,PTAFR,PTGER2,PTGER4,RAC2,RALB,RAP1A,STAT3,SUCNR1,TGFB1,TUBA4A,VIP…
Role of JAK1 and JAK3 in Œ≥c Cytokine Signaling	7.22	0.246	NaN	FES,IL15,IL21R,IL2RA,IL2RB,IL4R,IL7,IL7R,PIK3CD,PIK3CG,PTK2B,RALB,RAP1A,STAT3,STAT5A,STAT6,SYK
Systemic Lupus Erythematosus Signaling	6.96	0.144	NaN	C7,CD22,CD247,CD28,CD3G,CD40,CD40LG,CD72,CD79A,CD79B,CD86,FCER1G,FCGR2A,FCGR3A/FCGR3B,HLA-E,HLA-F,IL18,IL1B,IL1RN,IL6R,INPP5D,LCK,LYN,PIK3CD,PIK3CG,PIM2,PLCG2,PTPN6,PTPRC,RALB,RAP1A,TNF,TNFSF13B
PI3K/AKT Signaling	6.96	0.16	2.111	FOXO1,GDF15,IFNAR1,IKBKB,IKBKE,IL10RA,IL10RB,IL13RA1,IL18R1,IL18RAP,IL1R2,IL21R,IL27RA,IL2RA,IL2RB,IL4R,IL6R,IL6ST,IL7R,INPP5D,ITGA4,NFKBIA,NFKBIE,PIK3CD,PIK3CG,PPM1J,RALB,RAP1A
STAT3 Pathway	6.94	0.178	2.496	CISH,IFNAR1,IL10RA,IL10RB,IL13RA1,IL18R1,IL18RAP,IL1B,IL1R2,IL21R,IL27RA,IL2RA,IL2RB,IL4R,IL6R,IL6ST,IL7R,MYC,PTPN6,RALB,RAP1A,STAT3,TGFB1,TGFBR2
Osteoarthritis Pathway	6.77	0.147	4.707	AGER,BMP2,CASP10,CASP5,CASP6,CASP7,CASP8,FZD10,FZD6,IL18RAP,IL1B,IL1R2,ITGA4,LEF1,MMP1,MMP12,MMP9,S100A8,S100A9,SDC4,SLC39A8,SMAD3,SPP1,TCF3,TCF7,TGFB1,TGFBR2,TLR2,TLR4,TNF,TNFRSF1B
GŒ±q Signaling	6.76	0.165	3.71	ADRA1B,BTK,GNB4,GNG5,GNG7,HMOX1,HTR2A,IKBKB,IKBKE,ITPR1,ITPR2,NFKBIA,NFKBIE,PIK3CD,PIK3CG,PLCG2,PRKCD,PRKCH,PTK2B,RAC2,RGS18,RGS2,RHOC,RHOG,RHOH,RND1
FcŒ≥ Receptor-mediated Phagocytosis in Macrophages and Monocytes	6.52	0.202	4.359	FCGR2A,FCGR3A/FCGR3B,FGR,FYB1,HCK,HMOX1,INPP5D,LCP2,LYN,PIK3CG,PRKCD,PRKCH,PTK2B,RAC2,SYK,VASP,VAV1,VAV3,WAS
Induction of Apoptosis by HIV1	6.43	0.246	1.807	BIRC2,BIRC3,CASP8,CXCR4,FAS,FASLG,IKBKB,IKBKE,NFKBIA,NFKBIE,TNF,TNFRSF11B,TNFRSF1B,TRADD,TRAF1
Fc Epsilon RI Signaling	6.22	0.179	3.9	BTK,FCER1A,FCER1G,GRAP2,INPP5D,LCP2,LYN,PIK3CD,PIK3CG,PLA2G2A,PLA2G4C,PLCG2,PRKCD,PRKCH,RAC2,RALB,RAP1A,SYK,TNF,VAV1,VAV3
Regulation of IL-2 Expression in Activated and Anergic T Lymphocytes	6.21	0.202	NaN	CARD11,CD247,CD28,CD3G,IKBKB,IKBKE,NFKBIA,NFKBIE,PLCG2,RALB,RAP1A,SMAD3,TGFB1,TGFBR2,TOB1,VAV1,VAV3,ZAP70
Acute Phase Response Signaling	6.21	0.151	3.838	C2,FTL,HAMP,HMOX1,HP,IKBKB,IKBKE,IL18,IL1B,IL1RN,IL6R,IL6ST,ITIH3,NFKBIA,NFKBIE,NR3C1,PIK3CD,PIK3CG,RALB,RAP1A,RBP5,STAT3,TCF3,TNF,TNFRSF11B,TNFRSF1B,TRADD
OX40 Signaling Pathway	6.14	0.2	0.707	B2M,CD247,CD3G,CD4,FCER1G,HLA-DMA,HLA-DMB,HLA-DOB,HLA-DPA1,HLA-DPB1,HLA-DQB2,HLA-DRA,HLA-E,HLA-F,NFKBIA,NFKBIE,TNFRSF4,TRAF5
TWEAK Signaling	6.03	0.314	0.302	BIRC2,BIRC3,CASP6,CASP7,CASP8,IKBKB,IKBKE,NFKBIA,NFKBIE,TRADD,TRAF1
Glucocorticoid Receptor Signaling	6.02	0.119	NaN	CCL11,CCL13,CCL5,CD163,CD247,CD3G,CEBPA,HSPA2,HSPA6,ICAM1,IFNG,IKBKB,IKBKE,IL1B,IL1R2,IL1RN,KRT72,KRT86,MMP1,NFKBIA,NFKBIE,NR3C1,NR3C2,NRIP1,PIK3CD,PIK3CG,PLAU,POMC,RALB,RAP1A,SMAD3,SMARCA2,STAT3,STAT5A,TGFB1,TGFBR2,TNF,TSC22D3,VCAM1,VIPR1
LXR/RXR Activation	5.97	0.174	-2.065	APOE,APOL1,CD14,CETP,CLU,IL18,IL18RAP,IL1B,IL1R2,IL1RN,LY96,LYZ,MMP9,MSR1,MYLIP,NR1H3,S100A8,TLR4,TNF,TNFRSF11B,TNFRSF1B
Calcium-induced T Lymphocyte Apoptosis	5.95	0.227	3.742	ATP2A3,CD247,CD3G,CD4,FCER1G,HLA-DMA,HLA-DMB,HLA-DOB,HLA-DRA,ITPR1,ITPR2,LCK,PRKCD,PRKCH,ZAP70
Pathogenesis of Multiple Sclerosis	5.84	0.667	NaN	CCL5,CCR1,CXCL10,CXCL11,CXCL9,CXCR3
TNFR2 Signaling	5.79	0.333	1.414	BIRC2,BIRC3,IKBKB,IKBKE,NFKBIA,NFKBIE,TNF,TNFAIP3,TNFRSF1B,TRAF1
G-Protein Coupled Receptor Signaling	5.68	0.125	NaN	ADORA3,ADRA1B,ADRA2A,CNR2,FPR1,GNAI2,HTR2A,HTR7,IKBKB,IKBKE,NFKBIA,NFKBIE,NPY1R,P2RY13,P2RY14,PDE4A,PDE4B,PDE6G,PDE7B,PIK3CD,PIK3CG,PTGER2,PTGER4,PTK2B,RALB,RAP1A,RASGRP1,RGS10,RGS14,RGS18,RGS2,SMPDL3A,STAT3,VIPR1
iNOS Signaling	5.67	0.267	3.317	CD14,IFNG,IFNGR1,IFNGR2,IKBKB,IKBKE,IRAK3,IRF1,LY96,NFKBIA,NFKBIE,TLR4
Lymphotoxin Œ≤ Receptor Signaling	5.64	0.245	2.714	BIRC2,CXCL1,IKBKB,IKBKE,LTB,NFKBIA,PIK3CD,PIK3CG,RELB,TNFSF14,TRAF1,TRAF5,VCAM1
FAT10 Cancer Signaling Pathway	5.56	0.261	3.464	CXCR4,IFNG,IKBKB,IKBKE,NFKBIA,SMAD3,STAT3,TGFB1,TGFBR2,TNF,TNFRSF11B,TNFRSF1B
p38 MAPK Signaling	5.55	0.169	4.359	FAS,FASLG,IL18,IL18RAP,IL1B,IL1R2,IL1RN,IRAK3,MAP4K1,MKNK2,MYC,PLA2G2A,PLA2G4C,RPS6KA4,TGFB1,TGFBR2,TIFA,TNF,TNFRSF1B,TRADD
Apoptosis Signaling	5.51	0.182	0.471	BCL2A1,BIRC2,BIRC3,CASP10,CASP6,CASP7,CASP8,FAS,FASLG,IKBKB,IKBKE,NFKBIA,NFKBIE,PLCG2,RALB,RAP1A,TNF,TNFRSF1B
Molecular Mechanisms of Cancer	5.5	0.11	NaN	ARHGEF19,ARHGEF2,ARHGEF3,ARHGEF6,ATM,BIRC2,BIRC3,BMP2,CASP10,CASP6,CASP7,CASP8,CCND2,CFLAR,FAS,FASLG,FOXO1,FZD10,FZD6,GNAI2,ITGA4,LEF1,MYC,NFKBIA,NFKBIE,PIK3CD,PIK3CG,PRKCD,PRKCH,RAC2,RALB,RAP1A,RASGRP1,RHOC,RHOG,RHOH,RND1,SMAD3,TCF3,TGFB1,TGFBR2,WNT10A,WNT5A
NF-Œ∫B Activation by Viruses	5.38	0.195	4	CD4,CR2,IKBKB,IKBKE,ITGA4,ITGAL,ITGB2,LCK,NFKBIA,NFKBIE,PIK3CD,PIK3CG,PRKCD,PRKCH,RALB,RAP1A
CD40 Signaling	5.31	0.215	1.941	CD40,CD40LG,ICAM1,IKBKB,IKBKE,NFKBIA,NFKBIE,PIK3CD,PIK3CG,PTGS1,STAT3,TNFAIP3,TRAF1,TRAF5
Sperm Motility	5.28	0.13	3.873	BLK,BTK,CSF1R,DYRK3,EPHA1,EPHA4,FES,FGR,HCK,ITK,ITPR1,ITPR2,LCK,LYN,NPPC,PDE4A,PDE4B,PLA2G2A,PLA2G4C,PLA2G7,PLAAT4,PLCD1,PLCG2,PRKCD,PRKCH,PTK2B,SYK,TXK,ZAP70
Cdc42 Signaling	5.22	0.144	3.051	ARHGEF6,B2M,CD247,CD3G,CDC42EP2,FCER1G,FGD3,HLA-DMA,HLA-DMB,HLA-DOB,HLA-DPA1,HLA-DPB1,HLA-DQB2,HLA-DRA,HLA-E,HLA-F,IQGAP1,IQGAP2,ITGA4,ITK,MYL5,VAV1,WAS,WIPF1
IL-4 Signaling	5.17	0.188	NaN	HLA-DMA,HLA-DMB,HLA-DOB,HLA-DRA,IL13RA1,IL4R,INPP5D,IRF4,NR3C1,NR3C2,PIK3CD,PIK3CG,PTPN6,RALB,RAP1A,STAT6
IL-6 Signaling	5.16	0.16	4.359	CD14,IKBKB,IKBKE,IL18,IL18RAP,IL1B,IL1R2,IL1RN,IL6R,IL6ST,NFKBIA,NFKBIE,PIK3CD,PIK3CG,RALB,RAP1A,STAT3,TNF,TNFRSF11B,TNFRSF1B
TNFR1 Signaling	5.15	0.24	2.111	BIRC2,BIRC3,CASP6,CASP7,CASP8,IKBKB,IKBKE,NFKBIA,NFKBIE,TNF,TNFAIP3,TRADD
Virus Entry via Endocytic Pathways	5.01	0.168	NaN	AP1G2,B2M,CD55,FLNC,HLA-E,HLA-F,ITGA4,ITGAL,ITGB2,ITGB7,PIK3CD,PIK3CG,PLCG2,PRKCD,PRKCH,RAC2,RALB,RAP1A
Retinoic acid Mediated Apoptosis Signaling	5	0.217	3.051	CASP8,CFLAR,IFNAR1,IFNG,IRF1,PARP12,PARP15,PARP4,PARP9,TNFRSF10A,TNFRSF10B,TNFRSF10C,TNFSF10
GP6 Signaling Pathway	4.92	0.16	4.243	APBB1IP,BTK,COL4A4,COL8A2,FCER1G,GRAP2,ITPR1,LAMB3,LAMC2,LCP2,LYN,PIK3CD,PIK3CG,PLCG2,PRKCD,PRKCH,RASGRP2,RHOG,SYK
Opioid Signaling Pathway	4.84	0.121	2.556	AP1G2,ARRB1,BLK,CACNA2D4,FGR,GNAI2,GNG5,GNG7,HCK,ITPR1,ITPR2,KCNJ5,LCK,LYN,MYC,NFKBIA,PIK3CG,PNOC,POMC,PRKCD,PRKCH,RAC2,RALB,RAP1A,RGS1,RGS10,RGS13,RGS14,RGS18,RPS6KA4
LPS/IL-1 Mediated Inhibition of RXR Function	4.79	0.125	1.387	ABCC3,ACSL5,ALDH16A1,APOE,CD14,CETP,CHST11,CHST2,FABP4,GSTM5,GSTO1,GSTP1,GSTT1,HS3ST3A1,IL18,IL18RAP,IL1B,IL1R2,IL1RN,LY96,MGST2,NR1H3,PPARGC1B,SULT1C2,TLR4,TNF,TNFRSF11B,TNFRSF1B
Activation of IRF by Cytosolic Pattern Recognition Receptors	4.76	0.206	1.387	CD40,DDX58,DHX58,IFIH1,IFIT2,IFNAR1,IKBKB,IKBKE,IRF7,ISG15,NFKBIA,NFKBIE,TNF
PEDF Signaling	4.73	0.183	3.051	CASP7,CASP8,CFLAR,FAS,FASLG,IKBKB,IKBKE,NFKBIA,NFKBIE,PIK3CD,PIK3CG,PNPLA2,RALB,RAP1A,TCF7
PPAR Signaling	4.6	0.163	-3.638	IKBKB,IKBKE,IL18,IL18RAP,IL1B,IL1R2,IL1RN,NFKBIA,NFKBIE,NR1H3,NRIP1,RALB,RAP1A,STAT5A,TNF,TNFRSF11B,TNFRSF1B
CCR5 Signaling in Macrophages	4.59	0.17	2.449	CACNA2D4,CCL5,CD247,CD3G,CD4,FAS,FASLG,FCER1G,GNAI2,GNB4,GNG5,GNG7,PLCG2,PRKCD,PRKCH,PTK2B
Protein Kinase A Signaling	4.57	0.103	1.671	ADD3,DUSP2,DUSP22,EBI3,FLNC,GNAI2,GNB4,GNG5,GNG7,ITPR1,ITPR2,KDELR2,LEF1,MYL5,NFKBIA,NFKBIE,PDE4A,PDE4B,PDE6G,PDE7B,PLCD1,PLCG2,PPP1R14C,PRKCD,PRKCH,PTK2B,PTPN22,PTPN6,PTPN7,PTPRC,PTPRE,PYGM,RAP1A,SMAD3,SMPDL3A,TCF3,TCF7,TGFB1,TGFBR2,TNNI2,VASP
Eicosanoid Signaling	4.53	0.197	2.449	ALOX15B,ALOX5,ALOX5AP,DPEP1,PLA2G2A,PLA2G4C,PLA2G7,PLAAT4,PTGDS,PTGER2,PTGER4,PTGES,PTGS1
fMLP Signaling in Neutrophils	4.52	0.155	3	CYBB,FPR1,GNAI2,GNB4,GNG5,GNG7,ITPR1,ITPR2,NCF2,NFKBIA,NFKBIE,PIK3CD,PIK3CG,PRKCD,PRKCH,RALB,RAP1A,WAS
Sphingosine-1-phosphate Signaling	4.47	0.154	1.291	ASAH1,CASP10,CASP5,CASP6,CASP7,CASP8,GNAI2,PIK3CD,PIK3CG,PLCD1,PLCG2,PTK2B,RAC2,RHOC,RHOG,RHOH,RND1,SMPD1
Lipid Antigen Presentation by CD1	4.45	0.308	NaN	AP1G2,B2M,CD1A,CD1B,CD1C,CD1D,FCER1G,PSAP
Phagosome Maturation	4.43	0.139	NaN	ATP6V0D2,B2M,CTSA,CTSB,CTSC,CTSG,CTSH,CTSK,CTSS,CTSW,CTSZ,CYBB,HLA-DRA,HLA-E,HLA-F,LAMP2,MPO,NCF2,TAP1,TCIRG1,TUBA4A
Myc Mediated Apoptosis Signaling	4.39	0.22	1.508	CASP8,CFLAR,FAS,FASLG,IKBKB,IKBKE,MYC,TNF,TNFRSF11B,TNFRSF1B,TRADD
MIF-mediated Glucocorticoid Regulation	4.36	0.265	2.333	CD14,CD74,LY96,NFKBIA,NFKBIE,NR3C1,PLA2G2A,PLA2G4C,TLR4
Endothelin-1 Signaling	4.35	0.128	4.491	CASP10,CASP5,CASP6,CASP7,CASP8,GNAI2,HMOX1,ITPR1,ITPR2,MYC,PIK3CD,PIK3CG,PLA2G2A,PLA2G4C,PLA2G7,PLAAT4,PLCD1,PLCG2,PRKCD,PRKCH,PTGER2,PTGS1,RALB,RAP1A
Glioblastoma Multiforme Signaling	4.32	0.133	3.578	FOXO1,FZD10,FZD6,ITPR1,ITPR2,LEF1,MYC,PIK3CD,PIK3CG,PLCD1,PLCG2,PRKCD,RAC2,RALB,RAP1A,RHOC,RHOG,RHOH,RND1,TCF3,WNT10A,WNT5A
IL-15 Production	4.27	0.149	4.243	BLK,BTK,CSF1R,DYRK3,EPHA1,EPHA4,FES,FGR,HCK,IL15,IRF1,ITK,LCK,LYN,PTK2B,SYK,TXK,ZAP70
CXCR4 Signaling	4.24	0.132	4.359	CD4,CXCL12,CXCR4,GNAI2,GNB4,GNG5,GNG7,ITPR1,ITPR2,LYN,MYL5,PIK3CD,PIK3CG,PRKCD,PRKCH,RAC2,RALB,RAP1A,RHOC,RHOG,RHOH,RND1
Th17 Activation Pathway	4.18	0.165	2.84	AHR,BATF,CCR6,FCER1G,IFNG,IL1B,IL21R,IL23A,IL6R,IRAK3,IRF4,PTGER2,PTGER4,STAT3,STAT4
Prolactin Signaling	4.17	0.173	3.464	IRF1,MYC,NMI,NR3C1,PIK3CD,PIK3CG,PLCG2,PRKCD,PRKCH,RALB,RAP1A,STAT3,STAT5A,TCF7
Role of RIG1-like Receptors in Antiviral Innate Immunity	4.16	0.227	2.121	CASP10,CASP8,DDX58,DHX58,IFIH1,IKBKB,IKBKE,IRF7,NFKBIA,NFKBIE
HOTAIR Regulatory Pathway	4.06	0.131	2.837	ELAVL1,ICAM1,IRF1,LEF1,MMP1,MMP12,MMP25,MMP9,MYC,NFKBIA,PIK3CD,PIK3CG,RHOC,SPP1,STAT3,TCF3,TCF7,TGFB1,TLR4,WNT10A,WNT5A
Caveolar-mediated Endocytosis Signaling	4.05	0.178	NaN	B2M,CD48,CD55,DYRK3,FLNC,HLA-E,HLA-F,ITGA4,ITGAL,ITGAM,ITGAX,ITGB2,ITGB7
Glioma Invasiveness Signaling	3.99	0.176	2.714	MMP9,PIK3CD,PIK3CG,PLAU,PLAUR,RAC2,RALB,RAP1A,RHOC,RHOG,RHOH,RND1,TIMP2
Role of Tissue Factor in Cancer	3.94	0.145	NaN	ARRB1,BLK,CXCL1,FGR,HCK,IL1B,LCK,LYN,MMP1,PIK3CD,PIK3CG,PLAUR,PTK2B,RALB,RAP1A,RPS6KA4,STAT5A
IL-15 Signaling	3.92	0.173	3.606	GZMB,IL15,IL2RB,LCK,MYC,PIK3CD,PIK3CG,RALB,RAP1A,STAT3,STAT5A,STAT6,SYK
Antiproliferative Role of TOB in T Cell Signaling	3.86	0.231	0.707	CD247,CD28,CD3G,DPP7,FCER1G,SMAD3,TGFB1,TGFBR2,TOB1
Cholecystokinin/Gastrin-mediated Signaling	3.84	0.143	3.873	EPHA4,IL18,IL1B,IL1RN,ITPR1,ITPR2,PRKCD,PRKCH,PTK2B,RAC2,RALB,RAP1A,RHOC,RHOG,RHOH,RND1,TNF
Role of JAK1, JAK2 and TYK2 in Interferon Signaling	3.8	0.292	1	IFNAR1,IFNAR2,IFNG,IFNGR1,IFNGR2,PTPN6,STAT3
VDR/RXR Activation	3.75	0.167	1.667	CAMP,CCL5,CD14,CEBPA,CXCL10,FOXO1,IFNG,PRKCD,PRKCH,SERPINB1,SPP1,TNFSF11,VDR
Acute Myeloid Leukemia Signaling	3.71	0.157	2.309	CEBPA,CSF1R,FLT3,LEF1,MYC,PIK3CD,PIK3CG,PIM2,RALB,RAP1A,STAT3,STAT5A,TCF3,TCF7
Thrombin Signaling	3.66	0.115	4.243	ARHGEF2,ARHGEF3,ARHGEF6,GNAI2,GNB4,GNG5,GNG7,IKBKB,ITPR1,ITPR2,MYL5,PIK3CD,PIK3CG,PLCD1,PLCG2,PRKCD,PRKCH,RAC2,RALB,RAP1A,RHOC,RHOG,RHOH,RND1
Role of Hypercytokinemia/hyperchemokinemia in the Pathogenesis of Influenza	3.51	0.209	NaN	CCL5,CCR1,CXCL10,IFNG,IL15,IL18,IL1B,IL1RN,TNF
Integrin Signaling	3.5	0.113	3.71	ACTN1,ITGA4,ITGAL,ITGAM,ITGAX,ITGB2,ITGB7,MYL5,PARVB,PIK3CD,PIK3CG,PLCG2,RAC2,RALB,RAP1A,RHOC,RHOG,RHOH,RND1,TSPAN4,VASP,WAS,WIPF1,ZYX
IL-23 Signaling Pathway	3.44	0.205	2.333	IL1B,IL23A,NFKBIA,PIK3CD,PIK3CG,STAT3,STAT4,TNF,TNFSF11
ILK Signaling	3.42	0.116	2.668	ACTN1,ARHGEF6,BMP2,DSP,FLNC,ITGB2,ITGB7,LEF1,MMP9,MYC,MYL5,PARVB,PIK3CD,PIK3CG,PPM1J,RAC2,RHOC,RHOG,RHOH,RND1,RPS6KA4,TNF
Reelin Signaling in Neurons	3.42	0.132	4	APOE,ARHGEF2,ARHGEF3,ARHGEF6,BLK,CNR2,FGR,HCK,ITGA4,ITGAL,ITGB2,LCK,LYN,MAP4K1,PIK3CD,PIK3CG,RAP1A
p70S6K Signaling	3.42	0.132	3.638	BTK,CD19,CD79A,CD79B,GNAI2,IL4R,LYN,PIK3CD,PIK3CG,PLCD1,PLCG2,PPM1J,PRKCD,PRKCH,RALB,RAP1A,SYK
Signaling by Rho Family GTPases	3.36	0.107	4.025	ARHGEF19,ARHGEF2,ARHGEF3,ARHGEF6,CDC42EP2,CYBB,DES,GNAI2,GNB4,GNG5,GNG7,IQGAP1,ITGA4,MYL5,NCF2,PIK3CD,PIK3CG,PIP5K1B,PTK2B,RAC2,RHOC,RHOG,RHOH,RND1,WAS,WIPF1
HIF1Œ± Signaling	3.36	0.112	3.128	ADRA1B,CYBB,HK2,HMOX1,HSPA2,HSPA6,IL6R,MKNK2,MMP1,MMP12,MMP25,MMP9,NCF2,PIK3CD,PIK3CG,PLCG2,PRKCD,PRKCH,RALB,RAP1A,SAT1,STAT3,TGFB1
Aryl Hydrocarbon Receptor Signaling	3.34	0.126	0.905	AHR,ALDH16A1,ATM,CCND2,FAS,FASLG,GSTM5,GSTO1,GSTP1,GSTT1,IL1B,MGST2,MYC,NQO2,NRIP1,TGFB1,TGM2,TNF
Axonal Guidance Signaling	3.34	0.0888	NaN	ADAM12,ADAM28,ADAM8,ADAMDEC1,ARHGEF6,BMP2,CXCL12,CXCR4,EPHA1,EPHA4,FES,FZD10,FZD6,GNAI2,GNB4,GNG5,GNG7,ITGA4,KEL,MME,MMP1,MMP12,MMP25,MMP9,MYL5,PIK3CD,PIK3CG,PLCD1,PLCG2,PRKCD,PRKCH,RAC2,RALB,RAP1A,RND1,SDCBP,SEMA4D,TUBA4A,VASP,WAS,WIPF1,WNT10A,WNT5A
FcŒ≥RIIB Signaling in B Lymphocytes	3.33	0.16	2.714	BTK,CACNA2D4,CD79A,CD79B,INPP5D,LYN,PIK3CD,PIK3CG,PLCG2,RALB,RAP1A,SYK
Angiopoietin Signaling	3.33	0.16	0	ANGPT2,DOK2,FOXO1,IKBKB,IKBKE,NFKBIA,NFKBIE,PIK3CD,PIK3CG,RALB,RAP1A,STAT5A
Antioxidant Action of Vitamin C	3.29	0.138	-3.606	GLRX,GSTO1,HMOX1,IKBKB,IKBKE,NFKBIA,NFKBIE,PLA2G2A,PLA2G4C,PLA2G7,PLAAT4,PLCD1,PLCG2,STAT5A,TNF
CCR3 Signaling in Eosinophils	3.15	0.129	3.162	CCL11,CCL26,GNAI2,GNB4,GNG5,GNG7,ITPR1,ITPR2,PIK3CD,PIK3CG,PLA2G2A,PLA2G4C,PRKCD,PRKCH,RALB,RAP1A
IL-3 Signaling	3.12	0.152	1.732	FOXO1,INPP5D,PIK3CD,PIK3CG,PRKCD,PRKCH,PTPN6,RALB,RAP1A,STAT3,STAT5A,STAT6
GŒ±i Signaling	3.11	0.128	2.324	ADORA3,ADRA2A,CNR2,FPR1,GNAI2,GNB4,GNG5,GNG7,NPY1R,P2RY13,P2RY14,RALB,RAP1A,RGS10,RGS14,STAT3
cAMP-mediated signaling	3.07	0.105	2.858	ADORA3,ADRA2A,CNR2,FPR1,GNAI2,HTR7,NPY1R,P2RY13,P2RY14,PDE4A,PDE4B,PDE6G,PDE7B,PKIG,PTGER2,PTGER4,RAP1A,RGS10,RGS14,RGS18,RGS2,SMPDL3A,STAT3,VIPR1
Sumoylation Pathway	3.05	0.136	-1.414	ARHGDIB,CEBPA,ETS1,FAS,FASLG,NFKBIA,NR3C1,RAC2,RHOC,RHOG,RHOH,RND1,SP100,ZNF217
Differential Regulation of Cytokine Production in Intestinal Epithelial Cells by IL-17A and IL-17F	3.04	0.261	NaN	CCL5,CXCL1,IFNG,IL1B,LCN2,TNF
LPS-stimulated MAPK Signaling	2.98	0.146	3.464	CD14,IKBKB,IKBKE,NFKBIA,NFKBIE,PIK3CD,PIK3CG,PRKCD,PRKCH,RALB,RAP1A,TLR4
B Cell Activating Factor Signaling	2.97	0.195	2.449	IKBKB,IKBKE,NFKBIA,NFKBIE,TNFRSF17,TNFSF13B,TRAF1,TRAF5
IL-2 Signaling	2.95	0.164	3.162	IL2RA,IL2RB,LCK,PIK3CD,PIK3CG,PTK2B,RALB,RAP1A,STAT5A,SYK
Autophagy	2.95	0.164	NaN	CTSA,CTSB,CTSC,CTSG,CTSH,CTSK,CTSS,CTSW,CTSZ,LAMP2
ERK/MAPK Signaling	2.94	0.109	2.837	DUSP2,ELF4,ETS1,ITGA4,MKNK2,MYC,PIK3CD,PIK3CG,PLA2G2A,PLA2G4C,PLCG2,PPM1J,PPP1R14C,PRKCD,PTK2B,RAC2,RALB,RAP1A,RPS6KA4,STAT3,VRK2
Actin Nucleation by ARP-WASP Complex	2.93	0.153	2.828	ITGA4,RAC2,RALB,RAP1A,RHOC,RHOG,RHOH,RND1,VASP,WAS,WIPF1
Renin-Angiotensin Signaling	2.92	0.127	3.606	CCL5,ITPR1,ITPR2,PIK3CD,PIK3CG,PLCG2,PRKCD,PRKCH,PTGER2,PTK2B,PTPN6,RALB,RAP1A,STAT3,TNF
Xenobiotic Metabolism General Signaling Pathway	2.91	0.119	4.123	ABCA4,AHR,FTL,GSTM5,GSTO1,GSTP1,GSTT1,HMOX1,MGST2,NQO2,NR1H3,PIK3CD,PIK3CG,PRKCD,PRKCH,RALB,RAP1A
MIF Regulation of Innate Immunity	2.9	0.19	2.828	CD14,CD74,LY96,NFKBIA,NFKBIE,PLA2G2A,PLA2G4C,TLR4
IL-9 Signaling	2.88	0.212	1.633	BCL3,CISH,PIK3CD,PIK3CG,STAT3,STAT5A,TNF
Œ±-Adrenergic Signaling	2.86	0.135	3.162	ADRA2A,GNAI2,GNB4,GNG5,GNG7,ITPR1,ITPR2,PLCG2,PRKCD,PRKCH,PYGM,RALB,RAP1A
Thrombopoietin Signaling	2.84	0.159	3.162	MYC,PIK3CD,PIK3CG,PLCG2,PRKCD,PRKCH,RALB,RAP1A,STAT3,STAT5A
Oncostatin M Signaling	2.83	0.186	2.828	CHI3L1,IL6ST,MMP1,PLAU,RALB,RAP1A,STAT3,STAT5A
UVA-Induced MAPK Signaling	2.77	0.133	2.646	ATM,PARP12,PARP15,PARP4,PARP9,PIK3CD,PIK3CG,PLCD1,PLCG2,RALB,RAP1A,RPS6KA4,SMPD1
Role of Cytokines in Mediating Communication between Immune Cells	2.76	0.167	NaN	IFNG,IL15,IL18,IL1B,IL1RN,IL23A,IL32,TGFB1,TNF
Erythropoietin Signaling	2.74	0.145	NaN	NFKBIA,NFKBIE,PIK3CD,PIK3CG,PLCG2,PRKCD,PRKCH,PTPN6,RALB,RAP1A,STAT5A
Macropinocytosis Signaling	2.74	0.145	2.828	CD14,CSF1R,ITGB2,ITGB7,PIK3CD,PIK3CG,PLCG2,PRKCD,PRKCH,RALB,RAP1A
Coronavirus Pathogenesis Pathway	2.71	0.114	1.213	CASP8,CCL5,DDX58,FASLG,IFNAR1,IFNAR2,IKBKB,IL1B,IRF7,NFKBIA,NFKBIE,NLRP3,PYCARD,SMAD3,STAT3,TGFB1,TGFBR2
IL-7 Signaling Pathway	2.64	0.141	1.667	BCL6,DNTT,FOXO1,IFNG,IL7,IL7R,LYN,MYC,PIK3CD,PIK3CG,STAT5A
Regulation of the Epithelial-Mesenchymal Transition Pathway	2.61	0.104	NaN	ETS1,FGF7,FZD10,FZD6,GSC,ID2,LEF1,MMP9,PIK3CD,PIK3CG,RALB,RAP1A,SMAD3,STAT3,TCF3,TCF7,TGFB1,TGFBR2,WNT10A,WNT5A
Tryptophan Degradation to 2-amino-3-carboxymuconate Semialdehyde	2.6	0.5	NaN	KMO,KYNU,TDO2
Nur77 Signaling in T Lymphocytes	2.59	0.147	2.53	CD247,CD28,CD3G,CD86,ESRRA,FASLG,FCER1G,PRKCD,PRKCH,TNFSF10
Mouse Embryonic Stem Cell Pluripotency	2.58	0.126	3.464	FZD10,FZD6,ID2,IL6ST,LEF1,MYC,PIK3CD,PIK3CG,RALB,RAP1A,STAT3,TCF3,TCF7
RhoGDI Signaling	2.57	0.106	-3.051	ARHGAP4,ARHGAP9,ARHGDIB,ARHGEF19,ARHGEF2,ARHGEF3,ARHGEF6,GNAI2,GNB4,GNG5,GNG7,ITGA4,MYL5,PIP5K1B,RAC2,RHOC,RHOG,RHOH,RND1
FLT3 Signaling in Hematopoietic Progenitor Cells	2.55	0.138	2.714	FLT3,INPP5D,PIK3CD,PIK3CG,RALB,RAP1A,RPS6KA4,STAT3,STAT4,STAT5A,STAT6
Chemokine Signaling	2.55	0.138	3.317	CCL11,CCL13,CCL5,CXCL12,CXCR4,GNAI2,PIK3CG,PLCG2,PTK2B,RALB,RAP1A
Neuroprotective Role of THOP1 in Alzheimer's Disease	2.55	0.121	2.53	CFD,CTSG,GZMA,GZMB,GZMK,GZMM,HLA-E,HLA-F,IFNG,MME,MMP9,PNOC,ST14,TPP1
MSP-RON Signaling Pathway	2.54	0.155	NaN	CCR2,IFNG,ITGAM,ITGB2,PIK3CD,PIK3CG,TLR2,TLR4,TNF
Docosahexaenoic Acid (DHA) Signaling	2.51	0.184	NaN	BCL2A1,BIK,FOXO1,IL1B,PIK3CD,PIK3CG,PNPLA2
Endocannabinoid Cancer Inhibition Pathway	2.5	0.112	0.775	CASP10,CASP5,CASP6,CASP7,CASP8,CCND2,CNR2,GNAI2,LEF1,MYC,NUPR1,PIK3CD,PIK3CG,SMPD1,TCF3,TCF7
GM-CSF Signaling	2.49	0.143	1.897	BCL2A1,CISH,ETS1,HCK,LYN,PIK3CD,PIK3CG,RALB,RAP1A,STAT3
Growth Hormone Signaling	2.45	0.141	2.53	CEBPA,PIK3CD,PIK3CG,PLCG2,PRKCD,PRKCH,PTPN6,RPS6KA4,STAT3,STAT5A
Small Cell Lung Cancer Signaling	2.45	0.141	2.646	BIRC2,IKBKB,IKBKE,MYC,NFKBIA,NFKBIE,PIK3CD,PIK3CG,TRAF1,TRAF5
April Mediated Signaling	2.44	0.179	1.134	IKBKB,IKBKE,NFKBIA,NFKBIE,TNFRSF17,TRAF1,TRAF5
Inhibition of Matrix Metalloproteases	2.44	0.179	-0.378	ADAM12,MMP1,MMP12,MMP25,MMP9,TFPI2,TIMP2
Paxillin Signaling	2.4	0.12	2.828	ACTN1,ARHGEF6,ITGA4,ITGAL,ITGAM,ITGAX,ITGB2,ITGB7,PIK3CD,PIK3CG,PTK2B,RALB,RAP1A
Adipogenesis pathway	2.38	0.112	NaN	AGPAT2,ARNTL,BMP2,CEBPA,FABP4,FOXO1,FZD10,FZD6,SMAD3,TCF7,TGFB1,TNF,TXNIP,WNT5A,XBP1
G Beta Gamma Signaling	2.35	0.115	3.606	ARHGEF6,BTK,CACNA2D4,GNAI2,GNB4,GNG5,GNG7,KCNJ5,PIK3CG,PLCG2,PRKCD,PRKCH,RALB,RAP1A
Inhibition of ARE-Mediated mRNA Degradation Pathway	2.35	0.115	2.673	CD40LG,CD70,FASLG,LTB,POMC,PPM1J,TNF,TNFRSF11B,TNFRSF1B,TNFSF10,TNFSF11,TNFSF13B,TNFSF14,ZFP36L1
Xenobiotic Metabolism AHR Signaling Pathway	2.35	0.129	3.317	AHR,ALDH16A1,GSTM5,GSTO1,GSTP1,GSTT1,IL1B,MGST2,NQO2,NRIP1,TNF
Relaxin Signaling	2.29	0.107	1.667	GNAI2,GNB4,GNG5,GNG7,MMP9,NFKBIA,NFKBIE,PDE4A,PDE4B,PDE6G,PDE7B,PIK3CD,PIK3CG,RAP1A,RLN2,SMPDL3A
Iron homeostasis signaling pathway	2.29	0.109	NaN	ACO1,ATP6V0D2,BMP2,CD163,FTL,GDF15,HAMP,HMOX1,HP,IL6R,SLC40A1,SMAD3,STAT3,STAT5A,TCIRG1
4-1BB Signaling in T Lymphocytes	2.26	0.188	2	IKBKB,IKBKE,NFKBIA,NFKBIE,TNFRSF9,TRAF1
Glutathione-mediated Detoxification	2.26	0.188	2.449	ANPEP,GSTM5,GSTO1,GSTP1,GSTT1,MGST2
Role of PI3K/AKT Signaling in the Pathogenesis of Influenza	2.25	0.141	1.414	CCL5,GNAI2,IFNAR1,IFNG,NFKBIA,NFKBIE,PIK3CD,PIK3CG,PLAC8
IL-17A Signaling in Airway Cells	2.25	0.141	1.414	CCL11,CXCL1,IKBKB,IKBKE,NFKBIA,NFKBIE,PIK3CD,PIK3CG,STAT3
CD27 Signaling in Lymphocytes	2.24	0.151	1.633	CASP8,CD27,CD70,IKBKB,IKBKE,NFKBIA,NFKBIE,TRAF5
RANK Signaling in Osteoclasts	2.23	0.125	3	BIRC2,BIRC3,IKBKB,IKBKE,NFKBIA,NFKBIE,PIK3CD,PIK3CG,PTK2B,TNFSF11,TRAF5
P2Y Purigenic Receptor Signaling Pathway	2.2	0.11	3.051	GNAI2,GNB4,GNG5,GNG7,MYC,P2RY6,PIK3CD,PIK3CG,PLCD1,PLCG2,PRKCD,PRKCH,RALB,RAP1A
Gustation Pathway	2.19	0.104	NaN	CACNA2D4,GNG5,GNG7,ITPR1,ITPR2,P2RX5,P2RY10,P2RY13,P2RY14,P2RY6,PDE4A,PDE4B,PDE6G,PDE7B,PKD2L1,SMPDL3A
Type II Diabetes Mellitus Signaling	2.15	0.106	3.464	ACSL5,CACNA2D4,IKBKB,IKBKE,NFKBIA,NFKBIE,PIK3CD,PIK3CG,PRKCD,PRKCH,SMPD1,TNF,TNFRSF11B,TNFRSF1B,TRADD
Thyroid Cancer Signaling	2.11	0.127	2.53	CXCR4,FOXO1,LEF1,MYC,PIK3CD,PIK3CG,RALB,RAP1A,TCF3,TCF7
L-serine Degradation	2.11	0.667	NaN	SDS,SDSL
Role of NFAT in Cardiac Hypertrophy	2.08	0.0935	3.441	CACNA2D4,GNAI2,GNB4,GNG5,GNG7,IL11,IL6ST,ITPR1,ITPR2,PIK3CD,PIK3CG,PLCD1,PLCG2,PRKCD,PRKCH,RALB,RAP1A,RCAN3,TGFB1,TGFBR2
Xenobiotic Metabolism Signaling	2.08	0.0871	NaN	ABCC3,AHR,ALDH16A1,CHST11,CHST2,FTL,GSTM5,GSTO1,GSTP1,GSTT1,HMOX1,HS3ST3A1,IL1B,MGST2,NQO2,NRIP1,PIK3CD,PIK3CG,PPM1J,PRKCD,PRKCH,RALB,RAP1A,SULT1C2,TNF
Role of MAPK Signaling in the Pathogenesis of Influenza	2.08	0.125	NaN	CCL5,CXCL10,IFNG,PLA2G2A,PLA2G4C,PLA2G7,PLAAT4,RALB,RAP1A,TNF
IL-17A Signaling in Gastric Cells	2.08	0.2	NaN	CCL5,CXCL1,CXCL10,CXCL11,TNF
JAK/Stat Signaling	2.08	0.125	1.897	CISH,PIK3CD,PIK3CG,PTPN6,RALB,RAP1A,STAT3,STAT4,STAT5A,STAT6
IL-17A Signaling in Fibroblasts	2.06	0.171	NaN	IKBKB,IKBKE,LCN2,MMP1,NFKBIA,NFKBIE
SPINK1 General Cancer Pathway	2.03	0.13	1	GZMA,IL6R,MT1G,MT1X,PIK3CD,PIK3CG,RALB,RAP1A,STAT3
Telomerase Signaling	2.01	0.112	2.714	ELF4,ETS1,IL2RA,IL2RB,MYC,PIK3CD,PIK3CG,PPM1J,RALB,RAP1A,TEP1,TPP1
Actin Cytoskeleton Signaling	2	0.0917	2.668	ACTN1,ARHGEF6,CD14,FGD3,FGF7,IQGAP1,IQGAP2,ITGA4,MYL5,NCKAP1L,PIK3CD,PIK3CG,PIP5K1B,RAC2,RALB,RAP1A,SSH3,VAV1,VAV3,WAS
Human Embryonic Stem Cell Pluripotency	1.97	0.104	NaN	BMP2,FOXO1,FZD10,FZD6,LEF1,PIK3CD,PIK3CG,SMAD3,TCF3,TCF7,TGFB1,TGFBR2,WNT10A,WNT5A
TGF-Œ≤ Signaling	1.95	0.115	2.121	BMP2,GSC,IRF7,MAP4K1,RALB,RAP1A,RUNX3,SMAD3,TGFB1,TGFBR2,VDR
Factors Promoting Cardiogenesis in Vertebrates	1.94	0.1	3.873	BMP2,FZD10,FZD6,LEF1,MYC,PLCD1,PLCG2,PRKCD,PRKCH,TCF3,TCF7,TGFB1,TGFBR2,WNT10A,WNT5A
Ephrin B Signaling	1.92	0.125	2.449	CXCL12,CXCR4,GNAI2,GNB4,GNG5,GNG7,RAC2,VAV1,VAV3
Differential Regulation of Cytokine Production in Macrophages and T Helper Cells by IL-17A and IL-17F	1.91	0.222	NaN	CCL5,CXCL1,IL1B,TNF
Hematopoiesis from Pluripotent Stem Cells	1.89	0.143	NaN	CD247,CD3G,CD4,CD8A,FCER1G,IL11,IL7
Prostanoid Biosynthesis	1.89	0.3	NaN	PTGDS,PTGES,PTGS1
Glycine Betaine Degradation	1.89	0.3	NaN	SARDH,SDS,SDSL
Ephrin Receptor Signaling	1.89	0.0944	3.873	CXCL12,CXCR4,EPHA1,EPHA4,GNAI2,GNB4,GNG5,GNG7,ITGA4,PIK3CG,RAC2,RALB,RAP1A,SDCBP,STAT3,WAS,WIPF1
Ovarian Cancer Signaling	1.87	0.101	2.449	ARRB1,FZD10,FZD6,LEF1,MMP9,PIK3CD,PIK3CG,PTGS1,RALB,RAP1A,TCF3,TCF7,WNT10A,WNT5A
Apelin Cardiomyocyte Signaling Pathway	1.86	0.111	2.714	ATP2A3,GNAI2,ITPR1,MYL5,PIK3CD,PIK3CG,PLCD1,PLCG2,PRKCD,PRKCH,TGFB1
Cardiac Hypertrophy Signaling	1.85	0.0875	3.771	ADRA1B,ADRA2A,GNAI2,GNB4,GNG5,GNG7,IL6R,MYL5,PIK3CD,PIK3CG,PLCD1,PLCG2,RAC2,RALB,RAP1A,RHOC,RHOG,RHOH,RND1,TGFB1,TGFBR2
Heme Degradation	1.82	0.5	NaN	BLVRB,HMOX1
Ascorbate Recycling (Cytosolic)	1.82	0.5	NaN	GLRX,GSTO1
Superpathway of Inositol Phosphate Compounds	1.79	0.0905	4.243	ACP5,DUSP2,INPP5D,ITPKB,NUDT4,PAWR,PIK3CD,PIK3CG,PIP5K1B,PLCD1,PLCG2,PPM1H,PPP1R16B,PTPN22,PTPN6,PTPN7,PTPRC,SSH3
Germ Cell-Sertoli Cell Junction Signaling	1.77	0.0936	NaN	ACTN1,IQGAP1,PIK3CD,PIK3CG,RAC2,RALB,RAP1A,RHOC,RHOG,RHOH,RND1,TGFB1,TGFBR2,TNF,TUBA4A,ZYX
SAPK/JNK Signaling	1.77	0.108	3.317	FCER1G,GNG5,GNG7,LCK,MAP4K1,PIK3CD,PIK3CG,RAC2,RALB,RAP1A,TRADD
Phospholipases	1.76	0.125	2.828	HMOX1,PLA1A,PLA2G2A,PLA2G4C,PLA2G7,PLAAT4,PLCD1,PLCG2
GŒ±12/13 Signaling	1.75	0.1	3.317	BTK,IKBKB,IKBKE,MYL5,NFKBIA,NFKBIE,PIK3CD,PIK3CG,PTK2B,RALB,RAP1A,VAV1,VAV3
Chronic Myeloid Leukemia Signaling	1.74	0.107	NaN	IKBKB,IKBKE,MYC,PIK3CD,PIK3CG,RALB,RAP1A,SMAD3,STAT5A,TGFB1,TGFBR2
ErbB2-ErbB3 Signaling	1.72	0.123	2.121	FOXO1,MYC,PIK3CD,PIK3CG,RALB,RAP1A,STAT3,STAT5A
Role of Wnt/GSK-3Œ≤ Signaling in the Pathogenesis of Influenza	1.71	0.115	2	FZD10,FZD6,IFNAR1,IFNG,LEF1,TCF3,TCF7,WNT10A,WNT5A
NRF2-mediated Oxidative Stress Response	1.7	0.0899	2.646	DNAJB1,DNAJC5B,FTL,GSTM5,GSTO1,GSTP1,GSTT1,HMOX1,MAFG,MGST2,NQO2,PIK3CD,PIK3CG,PRKCD,PRKCH,RALB,RAP1A
G Protein Signaling Mediated by Tubby	1.68	0.161	NaN	GNB4,GNG5,GNG7,LCK,PLCG2
Role of NANOG in Mammalian Embryonic Stem Cell Pluripotency	1.68	0.101	2.646	BMP2,FZD10,FZD6,IL6ST,PIK3CD,PIK3CG,RALB,RAP1A,STAT3,TCL1A,WNT10A,WNT5A
Role of IL-17A in Arthritis	1.67	0.13	NaN	CCL5,CXCL1,MMP1,NFKBIA,NFKBIE,PIK3CD,PIK3CG
NAD biosynthesis II (from tryptophan)	1.66	0.25	NaN	KMO,KYNU,TDO2
GŒ±s Signaling	1.63	0.103	1.897	ADD3,GNB4,GNG5,GNG7,HCK,HTR7,PTGER2,PTGER4,RAP1A,RGS2,VIPR1
Regulation of Actin-based Motility by Rho	1.62	0.106	3	ITGA4,MYL5,PIP5K1B,RAC2,RHOC,RHOG,RHOH,RND1,WAS,WIPF1
Unfolded protein response	1.6	0.125	1.633	CD82,CEBPA,ERO1B,HSPA2,HSPA6,INSIG1,XBP1
Role of IL-17A in Psoriasis	1.57	0.231	NaN	CXCL1,S100A8,S100A9
CNTF Signaling	1.56	0.123	2.646	IL6ST,PIK3CD,PIK3CG,RALB,RAP1A,RPS6KA4,STAT3
Tryptophan Degradation III (Eukaryotic)	1.53	0.174	2	CDYL,KMO,KYNU,TDO2
HGF Signaling	1.53	0.0991	3	ELF4,ETS1,ITGA4,PIK3CD,PIK3CG,PLCG2,PRKCD,PRKCH,RALB,RAP1A,STAT3
HER-2 Signaling in Breast Cancer	1.52	0.107	NaN	FOXO1,ITGB2,ITGB7,PIK3CD,PIK3CG,PRKCD,PRKCH,RALB,RAP1A
VEGF Family Ligand-Receptor Interactions	1.52	0.107	3	PIK3CD,PIK3CG,PLA2G2A,PLA2G4C,PLCG2,PRKCD,PRKCH,RALB,RAP1A
p53 Signaling	1.51	0.102	1.414	ATM,CASP6,CCND2,FAS,PERP,PIK3CD,PIK3CG,TIGAR,TNFRSF10A,TNFRSF10B
FXR/RXR Activation	1.5	0.0952	NaN	APOE,APOL1,CETP,CLU,CYP27A1,FBP1,FOXO1,IL18,IL1B,IL1RN,NR1H3,TNF
PTEN Signaling	1.5	0.0952	-2.309	FASLG,FOXO1,IKBKB,IKBKE,INPP5D,ITGA4,PIK3CD,PIK3CG,RAC2,RALB,RAP1A,TGFBR2
Rac Signaling	1.5	0.0982	3.317	CYBB,IQGAP1,IQGAP2,ITGA4,NCF2,PIK3CD,PIK3CG,PIP5K1B,PTK2B,RALB,RAP1A
Maturity Onset Diabetes of Young (MODY) Signaling	1.49	0.119	NaN	APOE,APOL1,APOL2,APOL3,APOL6,BLK,UCP2
Basal Cell Carcinoma Signaling	1.48	0.111	2.449	BMP2,FZD10,FZD6,LEF1,TCF3,TCF7,WNT10A,WNT5A
VEGF Signaling	1.48	0.101	2.121	ACTN1,ELAVL1,FOXO1,PIK3CD,PIK3CG,PLCG2,PTK2B,PTPN6,RALB,RAP1A
Leukotriene Biosynthesis	1.48	0.214	NaN	ALOX5,DPEP1,MGST2
Coagulation System	1.47	0.143	0.447	F5,PLAU,PLAUR,PROC,TFPI
Glutathione Redox Reactions I	1.47	0.167	2	GPX1,GSTP1,GSTT1,MGST2
Ephrin A Signaling	1.47	0.128	NaN	EPHA1,EPHA4,PIK3CD,PIK3CG,VAV1,VAV3
NGF Signaling	1.45	0.0965	3.317	IKBKB,IKBKE,PIK3CD,PIK3CG,PLCG2,PRKCD,RALB,RAP1A,RHOG,RPS6KA4,SMPD1
Semaphorin Signaling in Neurons	1.45	0.117	NaN	FES,RAC2,RHOC,RHOG,RHOH,RND1,SEMA4D
SPINK1 Pancreatic Cancer Pathway	1.45	0.117	-1.89	CPA3,CTSA,CTSB,MMP12,SMAD3,TGFB1,TGFBR2
Aldosterone Signaling in Epithelial Cells	1.44	0.0886	3.162	DNAJB1,DNAJC5B,HSPA2,HSPA6,ITPR1,ITPR2,NR3C2,PIK3CD,PIK3CG,PIP5K1B,PLCD1,PLCG2,PRKCD,PRKCH
Apelin Endothelial Signaling Pathway	1.43	0.0957	3.162	GNAI2,ICAM1,KLF2,PIK3CD,PIK3CG,PRKCD,PRKCH,RALB,RAP1A,SMAD3,VCAM1
Leptin Signaling in Obesity	1.42	0.108	1.342	FOXO1,GHRL,PIK3CD,PIK3CG,PLCD1,PLCG2,POMC,STAT3
Synaptic Long Term Depression	1.42	0.0847	3.5	CACNA2D4,GNAI2,ITPR1,ITPR2,LYN,PLA2G2A,PLA2G4C,PLA2G7,PLAAT4,PLCD1,PLCG2,PPM1J,PRKCD,PRKCH,RALB,RAP1A
Role of JAK family kinases in IL-6-type Cytokine Signaling	1.41	0.16	NaN	IL6R,IL6ST,STAT3,STAT5A
Ceramide Signaling	1.41	0.102	1.414	PIK3CD,PIK3CG,PPM1J,RALB,RAP1A,SMPD1,TNF,TNFRSF11B,TNFRSF1B
GDNF Family Ligand-Receptor Interactions	1.36	0.105	2.449	DOK2,ITPR1,ITPR2,PIK3CD,PIK3CG,PLCG2,RALB,RAP1A
Antiproliferative Role of Somatostatin Receptor 2	1.33	0.104	2.646	GNB4,GNG5,GNG7,PIK3CD,PIK3CG,PTPN6,RALB,RAP1A
RAR Activation	1.33	0.0825	NaN	BMP2,DHRS9,MMP1,NRIP1,PIK3CD,PIK3CG,PNRC1,PRKCD,PRKCH,RBP5,REL,RELB,SMAD3,SMARCA2,STAT5A,TGFB1
Prostate Cancer Signaling	1.33	0.0989	NaN	FOXO1,GSTP1,LEF1,NFKBIA,NFKBIE,PIK3CD,PIK3CG,RALB,RAP1A
IL-1 Signaling	1.33	0.0989	2.236	GNAI2,GNB4,GNG5,GNG7,IKBKB,IKBKE,IRAK3,NFKBIA,NFKBIE
Granzyme B Signaling	1.33	0.188	NaN	CASP8,GZMB,PRF1
Extrinsic Prothrombin Activation Pathway	1.33	0.188	NaN	F5,PROC,TFPI
Agrin Interactions at Neuromuscular Junction	1.31	0.103	2.646	ARHGEF6,ITGA4,ITGAL,ITGB2,RAC2,RALB,RAP1A,UTRN
Insulin Secretion Signaling Pathway	1.3	0.0782	4.359	FGR,HCK,ITPR1,ITPR2,LCK,LYN,PIK3CD,PIK3CG,PLCD1,PLCG2,PRKCD,PRKCH,RAP1A,SPCS3,STAT3,STAT4,STAT5A,STAT6,TCF3
3-phosphoinositide Biosynthesis	1.29	0.0843	3.742	ACP5,DUSP2,NUDT4,PAWR,PIK3CD,PIK3CG,PIP5K1B,PPM1H,PPP1R16B,PTPN22,PTPN6,PTPN7,PTPRC,SSH3
Melatonin Degradation III	1.28	1	NaN	MPO
Glutamine Biosynthesis I	1.28	1	NaN	GLUL
Histamine Biosynthesis	1.28	1	NaN	HDC
IL-17 Signaling	1.25	0.1	NaN	CCL11,CXCL1,CXCL10,CXCL11,PIK3CD,PIK3CG,RALB,RAP1A
ErbB4 Signaling	1.23	0.104	2.646	PIK3CD,PIK3CG,PLCG2,PRKCD,PRKCH,RALB,RAP1A
Cardiac Œ≤-adrenergic Signaling	1.19	0.0851	1	ATP2A3,GNB4,GNG5,GNG7,PDE4A,PDE4B,PDE6G,PDE7B,PKIG,PPM1J,PPP1R14C,SMPDL3A
PAK Signaling	1.19	0.0928	3	ARHGEF6,ITGA4,MYL5,PIK3CD,PIK3CG,PTK2B,RALB,RAP1A,TNF
Role of IL-17F in Allergic Inflammatory Airway Diseases	1.18	0.119	NaN	CXCL1,CXCL10,IL11,IL1B,RPS6KA4
D-myo-inositol-5-phosphate Metabolism	1.18	0.0828	3.606	ACP5,DUSP2,NUDT4,PAWR,PLCD1,PLCG2,PPM1H,PPP1R16B,PTPN22,PTPN6,PTPN7,PTPRC,SSH3
Xenobiotic Metabolism CAR Signaling Pathway	1.18	0.0798	2.84	ABCC3,ALDH16A1,CHST11,CHST2,GSTM5,GSTO1,GSTP1,GSTT1,HS3ST3A1,MGST2,NRIP1,PPM1J,PRKCD,PRKCH,SULT1C2
GPCR-Mediated Nutrient Sensing in Enteroendocrine Cells	1.18	0.0893	2.53	CACNA2D4,GNAI2,GNG5,GNG7,ITPR1,ITPR2,PLCD1,PLCG2,PRKCD,PRKCH
14-3-3-mediated Signaling	1.17	0.0866	3	FOXO1,PIK3CD,PIK3CG,PLCD1,PLCG2,PRKCD,PRKCH,RALB,RAP1A,TNF,TUBA4A
Huntington's Disease Signaling	1.16	0.0759	0.277	CASP10,CASP5,CASP6,CASP7,CASP8,DNAJB1,GNB4,GNG5,GNG7,HSPA2,HSPA6,ITPR1,PACSIN1,PIK3CD,PIK3CG,PRKCD,PRKCH,TGM2
Regulation Of The Epithelial Mesenchymal Transition In Development Pathway	1.15	0.0952	2.236	FZD10,FZD6,GSC,LEF1,TCF3,TCF7,WNT10A,WNT5A
tRNA Splicing	1.15	0.116	2.236	PDE4A,PDE4B,PDE6G,PDE7B,SMPDL3A
PPARŒ±/RXRŒ± Activation	1.15	0.0789	-2.714	BCL3,IKBKB,IKBKE,IL18RAP,IL1B,IL1R2,NFKBIA,NFKBIE,PLCD1,PLCG2,RALB,RAP1A,SMAD3,TGFB1,TGFBR2
Xenobiotic Metabolism PXR Signaling Pathway	1.12	0.0781	2.84	ABCC3,ALDH16A1,CHST11,CHST2,GSTM5,GSTO1,GSTP1,GSTT1,HS3ST3A1,MGST2,NRIP1,PPP1R14C,PRKCD,PRKCH,SULT1C2
Semaphorin Neuronal Repulsive Signaling Pathway	1.12	0.0846	1.508	BCAN,FES,ITGA4,MYL5,PDE4A,PDE4B,PIK3CD,PIK3CG,PLCG2,RND1,SEMA4D
Endocannabinoid Developing Neuron Pathway	1.12	0.087	3.162	CNR2,GNAI2,GNG5,GNG7,PIK3CD,PIK3CG,RAC2,RALB,RAP1A,STAT3
PDGF Signaling	1.11	0.093	2.828	INPP5D,MYC,PIK3CD,PIK3CG,PLCG2,RALB,RAP1A,STAT3
Neuropathic Pain Signaling In Dorsal Horn Neurons	1.1	0.0891	3	ITPR1,ITPR2,KCNN4,PIK3CD,PIK3CG,PLCD1,PLCG2,PRKCD,PRKCH
Dopamine-DARPP32 Feedback in cAMP Signaling	1.08	0.0798	1.667	ATP2A3,GNAI2,ITPR1,ITPR2,KCNJ10,KCNJ5,PAWR,PLCD1,PLCG2,PPM1J,PPP1R14C,PRKCD,PRKCH
Non-Small Cell Lung Cancer Signaling	1.07	0.0959	1.89	ITPR1,ITPR2,PIK3CD,PIK3CG,RALB,RAP1A,STK4
Endometrial Cancer Signaling	1.04	0.1	2.236	LEF1,MYC,PIK3CD,PIK3CG,RALB,RAP1A
Epithelial Adherens Junction Signaling	1.01	0.0789	NaN	ACTN1,IQGAP1,LEF1,MYL5,RALB,RAP1A,TCF3,TCF7,TGFBR2,TUBA4A,WAS,ZYX
Adenine and Adenosine Salvage I	0.996	0.5	NaN	APRT
Wnt/Ca+ pathway	0.991	0.0968	2.449	FZD10,FZD6,PDE6G,PLCD1,PLCG2,WNT5A
3-phosphoinositide Degradation	0.943	0.0769	3.464	ACP5,DUSP2,INPP5D,NUDT4,PAWR,PPM1H,PPP1R16B,PTPN22,PTPN6,PTPN7,PTPRC,SSH3
Melanocyte Development and Pigmentation Signaling	0.936	0.0851	2.121	PIK3CD,PIK3CG,PLCG2,POMC,PTPN6,RALB,RAP1A,RPS6KA4
ErbB Signaling	0.936	0.0851	2.121	FOXO1,PIK3CD,PIK3CG,PLCG2,PRKCD,PRKCH,RALB,RAP1A
BEX2 Signaling Pathway	0.936	0.0886	1.134	LEF1,NFKBIA,PPM1J,SPP1,STAT3,TCF3,TCF7
FAK Signaling	0.917	0.0842	NaN	ARHGEF6,ITGA4,PIK3CD,PIK3CG,PLCG2,RALB,RAP1A,WAS
CREB Signaling in Neurons	0.914	0.0725	3.317	CACNA2D4,GNAI2,GNB4,GNG5,GNG7,ITPR1,ITPR2,PIK3CD,PIK3CG,PLCD1,PLCG2,PRKCD,PRKCH,RALB,RAP1A
D-myo-inositol (1,4,5,6)-Tetrakisphosphate Biosynthesis	0.914	0.0775	3.317	ACP5,DUSP2,NUDT4,PAWR,PPM1H,PPP1R16B,PTPN22,PTPN6,PTPN7,PTPRC,SSH3
D-myo-inositol (3,4,5,6)-tetrakisphosphate Biosynthesis	0.914	0.0775	3.317	ACP5,DUSP2,NUDT4,PAWR,PPM1H,PPP1R16B,PTPN22,PTPN6,PTPN7,PTPRC,SSH3
UVC-Induced MAPK Signaling	0.903	0.098	2.236	PRKCD,PRKCH,RALB,RAP1A,SMPD1
Neuregulin Signaling	0.9	0.0833	2.646	ITGA4,MYC,PLCG2,PRKCD,PRKCH,RALB,RAP1A,STAT5A
IL-22 Signaling	0.9	0.125	NaN	IL10RB,STAT3,STAT5A
Hematopoiesis from Multipotent Stem Cells	0.9	0.167	NaN	IL15,IL7
eNOS Signaling	0.9	0.0755	1.414	AQP3,AQP9,CASP8,HSPA2,HSPA6,ITPR1,ITPR2,PIK3CD,PIK3CG,PLCG2,PRKCD,PRKCH
Bladder Cancer Signaling	0.879	0.0825	2	FGF7,MMP1,MMP12,MMP25,MMP9,MYC,RALB,RAP1A
Apelin Adipocyte Signaling Pathway	0.873	0.0854	1.134	CYBB,GNAI2,GPX1,GSTP1,GSTT1,MGST2,NCF2
Cell Cycle: G1/S Checkpoint Regulation	0.87	0.0896	0.447	ATM,CCND2,FOXO1,MYC,SMAD3,TGFB1
D-myo-inositol (1,4,5)-Trisphosphate Biosynthesis	0.86	0.12	NaN	PIP5K1B,PLCD1,PLCG2
Adrenomedullin signaling pathway	0.833	0.0711	3.742	IL18,IL1B,IL1RN,ITPR1,ITPR2,KCNN4,PIK3CD,PIK3CG,PLCD1,PLCG2,PTK2B,RALB,RAP1A,TNF
Uracil Degradation II (Reductive)	0.83	0.333	NaN	DPYD
Tetrahydrobiopterin Biosynthesis I	0.83	0.333	NaN	SPR
Thymine Degradation	0.83	0.333	NaN	DPYD
Anandamide Degradation	0.83	0.333	NaN	FAAH2
Tetrahydrobiopterin Biosynthesis II	0.83	0.333	NaN	SPR
4-aminobutyrate Degradation I	0.83	0.333	NaN	SUCLG2
EGF Signaling	0.804	0.0909	2.236	ITPR1,ITPR2,PIK3CD,PIK3CG,STAT3
Glycogen Degradation III	0.788	0.143	NaN	GAA,PYGM
Chondroitin Sulfate Biosynthesis	0.783	0.0893	2.236	B3GALT6,CHST11,CHST2,HS3ST3A1,SULT1C2
GPCR-Mediated Integration of Enteroendocrine Signaling Exemplified by an L Cell	0.747	0.0822	0	GNAI2,ITPR1,ITPR2,PLCD1,PLCG2,VIPR1
Adenosine Nucleotides Degradation II	0.74	0.133	NaN	ADA,NT5E
Cancer Drug Resistance By Drug Efflux	0.738	0.0862	NaN	FOXO1,PIK3CD,PIK3CG,RALB,RAP1A
BAG2 Signaling Pathway	0.738	0.093	1	CTSB,HSPA2,HSPA6,MYC
Wnt/Œ≤-catenin Signaling	0.719	0.0694	0.905	FZD10,FZD6,LEF1,MAP4K1,MYC,PPM1J,TCF3,TCF7,TGFB1,TGFBR2,WNT10A,WNT5A
Airway Inflammation in Asthma	0.717	0.25	NaN	TNF
Arsenate Detoxification I (Glutaredoxin)	0.717	0.25	NaN	GSTO1
Retinoate Biosynthesis II	0.717	0.25	NaN	RBP5
PRPP Biosynthesis I	0.717	0.25	NaN	PRPS2
Spermine and Spermidine Degradation I	0.717	0.25	NaN	SAT1
Dermatan Sulfate Biosynthesis	0.717	0.0847	2.236	B3GALT6,CHST11,CHST2,HS3ST3A1,SULT1C2
Glutathione Redox Reactions II	0.717	0.25	NaN	GLRX
Acetate Conversion to Acetyl-CoA	0.717	0.25	NaN	ACSS1
Synaptogenesis Signaling Pathway	0.706	0.0641	4.025	AP1G2,APOE,EPHA1,EPHA4,FGR,HCK,ITPR1,LCK,LYN,PIK3CD,PIK3CG,PLCG2,PRKCD,RALB,RAP1A,RASGRP1,RASGRP2,SNCG,STXBP6,WAS
mTOR Signaling	0.697	0.067	2.887	HMOX1,PIK3CD,PIK3CG,PPM1J,PRKCD,PRKCH,RAC2,RALB,RAP1A,RHOC,RHOG,RHOH,RND1,RPS6KA4
Chondroitin Sulfate Degradation (Metazoa)	0.697	0.125	NaN	CEMIP2,HEXB
PCP pathway	0.697	0.0833	2	CELSR1,FZD10,FZD6,WNT10A,WNT5A
Clathrin-mediated Endocytosis Signaling	0.686	0.0674	NaN	AP1G2,APOE,APOL1,ARRB1,CLU,FGF7,ITGB2,ITGB7,LDLRAP1,LYZ,PIK3CD,PIK3CG,S100A8
Pancreatic Adenocarcinoma Signaling	0.684	0.0734	2.236	HMOX1,MMP9,PIK3CD,PIK3CG,SMAD3,STAT3,TGFB1,TGFBR2
Dermatan Sulfate Biosynthesis (Late Stages)	0.666	0.087	2	CHST11,CHST2,HS3ST3A1,SULT1C2
Heparan Sulfate Biosynthesis	0.66	0.0769	2.449	B3GALT6,CHST11,CHST2,HS3ST3A1,PLA1A,SULT1C2
Dermatan Sulfate Degradation (Metazoa)	0.658	0.118	NaN	CEMIP2,HEXB
Endocannabinoid Neuronal Synapse Pathway	0.654	0.0703	3	CACNA2D4,CNR2,GNAI2,GNG5,GNG7,ITPR1,KCNJ5,PLCD1,PLCG2
Corticotropin Releasing Hormone Signaling	0.652	0.069	1.89	CACNA2D4,FASLG,GNAI2,ITPR1,ITPR2,PLCG2,POMC,PRKCD,PRKCH,RAP1A
Synaptic Long Term Potentiation	0.64	0.0698	2.333	ITPR1,ITPR2,PLCD1,PLCG2,PPP1R14C,PRKCD,PRKCH,RALB,RAP1A
Ethanol Degradation II	0.636	0.0938	NaN	ACSS1,ADHFE1,DHRS9
Gap Junction Signaling	0.635	0.0657	NaN	GNAI2,HTR2A,ITPR1,ITPR2,PIK3CD,PIK3CG,PLCD1,PLCG2,PRKCD,PRKCH,RALB,RAP1A,TUBA4A
Galactose Degradation I (Leloir Pathway)	0.631	0.2	NaN	GALM
Tyrosine Degradation I	0.631	0.2	NaN	FAH
Glutamate Degradation III (via 4-aminobutyrate)	0.631	0.2	NaN	SUCLG2
Renal Cell Carcinoma Signaling	0.627	0.075	2.236	ETS1,PIK3CD,PIK3CG,RALB,RAP1A,TGFB1
Chondroitin Sulfate Biosynthesis (Late Stages)	0.623	0.0833	2	CHST11,CHST2,HS3ST3A1,SULT1C2
Amyotrophic Lateral Sclerosis Signaling	0.62	0.0722	0	BIRC2,BIRC3,CASP7,GLUL,GPX1,PIK3CD,PIK3CG
1D-myo-inositol Hexakisphosphate Biosynthesis II (Mammalian)	0.62	0.111	NaN	INPP5D,ITPKB
Purine Nucleotides Degradation II (Aerobic)	0.62	0.111	NaN	ADA,NT5E
D-myo-inositol (1,3,4)-trisphosphate Biosynthesis	0.62	0.111	NaN	INPP5D,ITPKB
FAT10 Signaling Pathway	0.62	0.111	NaN	IFNG,TNF
Regulation of Cellular Mechanics by Calpain Protease	0.604	0.0769	1	ACTN1,CAST,ITGA4,RALB,RAP1A
Nitric Oxide Signaling in the Cardiovascular System	0.592	0.0707	1.89	ATP2A3,ITPR1,ITPR2,PIK3CD,PIK3CG,PRKCD,PRKCH
Tight Junction Signaling	0.587	0.0655	NaN	ARHGEF2,CEBPA,CLDN23,MYL5,PPM1J,TGFB1,TGFBR2,TNF,TNFRSF11B,TNFRSF1B,VASP
Inhibition of Angiogenesis by TSP1	0.587	0.0882	NaN	MMP9,TGFB1,TGFBR2
Role of JAK2 in Hormone-like Cytokine Signaling	0.587	0.0882	NaN	PTPN6,STAT3,STAT5A
Retinoate Biosynthesis I	0.587	0.0882	NaN	BMP2,DHRS9,RBP5
Granzyme A Signaling	0.585	0.105	NaN	GZMA,PRF1
GADD45 Signaling	0.585	0.105	NaN	ATM,CCND2
Melanoma Signaling	0.583	0.08	2	PIK3CD,PIK3CG,RALB,RAP1A
Estrogen Receptor Signaling	0.58	0.061	3.13	FOXO1,GNAI2,GNG5,GNG7,MMP1,MMP12,MMP25,MMP9,MYC,MYL5,NR3C1,NRIP1,PIK3CD,PIK3CG,PLCD1,PLCG2,PRKCD,PRKCH,RALB,RAP1A
Senescence Pathway	0.577	0.0618	3.638	ATM,ELF4,ETS1,IKBKB,IKBKE,ITPR2,PIK3CD,PIK3CG,PPM1J,RALB,RAP1A,RPS6KA4,SMAD3,TGFB1,TGFBR2,TLR2,ZFP36L1
FGF Signaling	0.565	0.0714	1.633	FGF7,ITPR1,PIK3CD,PIK3CG,PTPN6,STAT3
Glycine Cleavage Complex	0.562	0.167	NaN	OCA2
UDP-N-acetyl-D-glucosamine Biosynthesis II	0.562	0.167	NaN	GFPT2
Adenine and Adenosine Salvage III	0.562	0.167	NaN	ADA
Ceramide Degradation	0.562	0.167	NaN	ASAH1
Rapoport-Luebering Glycolytic Shunt	0.562	0.167	NaN	TIGAR
Lactose Degradation III	0.562	0.167	NaN	PSAP
Androgen Signaling	0.558	0.0662	1	CACNA2D4,DNAJB1,GNAI2,GNB4,GNG5,GNG7,PRKCD,PRKCH,SMAD3
CDP-diacylglycerol Biosynthesis I	0.554	0.1	NaN	AGPAT2,AGPAT3
The Visual Cycle	0.554	0.1	NaN	DHRS9,RBP5
UVB-Induced MAPK Signaling	0.545	0.0769	2	PIK3CD,PIK3CG,PRKCD,PRKCH
GNRH Signaling	0.538	0.0636	3.162	CACNA2D4,GNAI2,GNG5,GNG7,ITPR1,ITPR2,PRKCD,PRKCH,PTK2B,RALB,RAP1A
Endoplasmic Reticulum Stress Pathway	0.524	0.0952	NaN	CASP7,XBP1
Transcriptional Regulatory Network in Embryonic Stem Cells	0.51	0.0741	NaN	CDYL,EOMES,SKIL,STAT3
Heparan Sulfate Biosynthesis (Late Stages)	0.51	0.0704	2.236	CHST11,CHST2,HS3ST3A1,PLA1A,SULT1C2
Trehalose Degradation II (Trehalase)	0.506	0.143	NaN	HK2
Purine Ribonucleosides Degradation to Ribose-1-phosphate	0.506	0.143	NaN	ADA
Glycoaminoglycan-protein Linkage Region Biosynthesis	0.506	0.143	NaN	B3GALT6
Polyamine Regulation in Colon Cancer	0.498	0.0909	NaN	MYC,SAT1
Phosphatidylglycerol Biosynthesis II (Non-plastidic)	0.498	0.0909	NaN	AGPAT2,AGPAT3
Melatonin Signaling	0.495	0.0694	2.236	GNAI2,PLCD1,PLCG2,PRKCD,PRKCH
ERK5 Signaling	0.495	0.0694	2.236	IL6ST,MYC,RALB,RAP1A,RPS6KA4
Role of Lipids/Lipid Rafts in the Pathogenesis of Influenza	0.471	0.087	NaN	IFNAR1,IFNG
Superpathway of D-myo-inositol (1,4,5)-trisphosphate Metabolism	0.471	0.087	NaN	INPP5D,ITPKB
Apelin Cardiac Fibroblast Signaling Pathway	0.471	0.087	NaN	ANGPT2,TGFB1
Estrogen-Dependent Breast Cancer Signaling	0.467	0.0676	2.236	PIK3CD,PIK3CG,RALB,RAP1A,STAT5A
Glutamate Receptor Signaling	0.463	0.0702	NaN	GLUL,GNG5,GNG7,SLC1A3
Glioma Signaling	0.46	0.0636	2.646	PIK3CD,PIK3CG,PLCG2,PRKCD,PRKCH,RALB,RAP1A
Sphingosine and Sphingosine-1-phosphate Metabolism	0.458	0.125	NaN	ASAH1
Sphingomyelin Metabolism	0.458	0.125	NaN	SMPD1
Vitamin-C Transport	0.447	0.0833	NaN	GLRX,GSTO1
Mechanisms of Viral Exit from Host Cells	0.444	0.0732	NaN	CHMP2B,PRKCD,PRKCH
Cellular Effects of Sildenafil (Viagra)	0.429	0.0611	NaN	ITPR1,ITPR2,KCNN4,MYL5,PDE4A,PDE4B,PLCD1,PLCG2
Retinol Biosynthesis	0.427	0.0714	NaN	DHRS9,PNPLA2,RBP5
Sucrose Degradation V (Mammalian)	0.418	0.111	NaN	GALM
Serotonin Receptor Signaling	0.41	0.0698	NaN	HTR2A,HTR7,SPR
NAD Salvage Pathway II	0.403	0.0769	NaN	ACP5,NT5E
Apelin Liver Signaling Pathway	0.403	0.0769	NaN	FAS,TNF
Calcium Transport I	0.383	0.1	NaN	ATP2A3
Role of Oct4 in Mammalian Embryonic Stem Cell Pluripotency	0.366	0.0652	NaN	CASP6,PHC3,SPP1
PFKFB4 Signaling Pathway	0.366	0.0652	NaN	FBP1,HK2,TGFB1
PXR/RXR Activation	0.357	0.0615	NaN	ABCC3,FOXO1,NR3C1,TNF
Œ≥-glutamyl Cycle	0.353	0.0909	NaN	ANPEP
GDP-glucose Biosynthesis	0.353	0.0909	NaN	HK2
TR/RXR Activation	0.352	0.0595	NaN	BCL3,HP,PIK3CD,PIK3CG,UCP2
Role of p14/p19ARF in Tumor Suppression	0.348	0.069	NaN	PIK3CD,PIK3CG
IGF-1 Signaling	0.34	0.0577	2.236	FOXO1,PIK3CD,PIK3CG,RALB,RAP1A,STAT3
RhoA Signaling	0.338	0.0569	0.816	ARHGAP4,ARHGAP9,CDC42EP2,EPHA1,MYL5,PIP5K1B,PTK2B
Glucose and Glucose-1-phosphate Degradation	0.325	0.0833	NaN	HK2
Glycogen Degradation II	0.325	0.0833	NaN	PYGM
Guanosine Nucleotides Degradation III	0.325	0.0833	NaN	NT5E
Remodeling of Epithelial Adherens Junctions	0.324	0.0588	NaN	ACTN1,IQGAP1,TUBA4A,ZYX
Fatty Acid Activation	0.3	0.0769	NaN	ACSL5
Urate Biosynthesis/Inosine 5'-phosphate Degradation	0.3	0.0769	NaN	NT5E
NAD Phosphorylation and Dephosphorylation	0.3	0.0769	NaN	ACP5
Bile Acid Biosynthesis, Neutral Pathway	0.3	0.0769	NaN	CYP27A1
Pregnenolone Biosynthesis	0.3	0.0769	NaN	CYP27A1
UDP-N-acetyl-D-galactosamine Biosynthesis II	0.3	0.0769	NaN	HK2
Fatty Acid Œ≤-oxidation I	0.3	0.0625	NaN	ACSL5,SDS
DNA Double-Strand Break Repair by Homologous Recombination	0.278	0.0714	NaN	ATM
DNA Double-Strand Break Repair by Non-Homologous End Joining	0.278	0.0714	NaN	ATM
Noradrenaline and Adrenaline Degradation	0.26	0.0571	NaN	ADHFE1,DHRS9
Choline Biosynthesis III	0.259	0.0667	NaN	HMOX1
Neurotrophin/TRK Signaling	0.25	0.0526	2	PIK3CD,PIK3CG,RALB,RAP1A
Glutaryl-CoA Degradation	0.24	0.0625	NaN	CDYL
Isoleucine Degradation I	0.24	0.0625	NaN	SDS
Notch Signaling	0.237	0.0541	NaN	LFNG,MFNG
Œ≥-linolenate Biosynthesis II (Animals)	0.224	0.0588	NaN	ACSL5
Mitochondrial L-carnitine Shuttle Pathway	0.224	0.0588	NaN	ACSL5
D-myo-inositol (1,4,5)-trisphosphate Degradation	0.224	0.0588	NaN	INPP5D
Histamine Degradation	0.224	0.0588	NaN	HNMT
Valine Degradation I	0.195	0.0526	NaN	SDS
Oxidative Ethanol Degradation III	0.195	0.0526	NaN	ACSS1
DNA damage-induced 14-3-3œÉ Signaling	0.195	0.0526	NaN	ATM
Circadian Rhythm Signaling	0	0.0303	NaN	ARNTL
Mitochondrial Dysfunction	0	0.0175	NaN	ACO1,CASP8,UCP2
Role of BRCA1 in DNA Damage Response	0	0.0375	NaN	ATM,IFNG,SMARCA2
Cardiomyocyte Differentiation via BMP Receptors	0	0.05	NaN	BMP2
CDK5 Signaling	0	0.037	1	PPM1J,PPP1R14C,RALB,RAP1A
Cell Cycle Regulation by BTG Family Proteins	0	0.027	NaN	PPM1J
Mitotic Roles of Polo-Like Kinase	0	0.0303	NaN	PPM1J,TGFB1
Role of CHK Proteins in Cell Cycle Checkpoint Control	0	0.0351	NaN	ATM,PPM1J
ATM Signaling	0	0.0309	NaN	ATM,NFKBIA,PPM1J
EIF2 Signaling	0	0.0269	0.816	ATF5,MYC,PIK3CD,PIK3CG,RALB,RAP1A
AMPK Signaling	0	0.0421	0.816	ADRA1B,ADRA2A,ELAVL1,FOXO1,PIK3CD,PIK3CG,PPM1H,PPM1J,SMARCA2
Hereditary Breast Cancer Signaling	0	0.0429	NaN	ATM,PIK3CD,PIK3CG,RALB,RAP1A,SMARCA2
Regulation of eIF4 and p70S6K Signaling	0	0.0385	1.633	ITGA4,PIK3CD,PIK3CG,PPM1J,RALB,RAP1A
Intrinsic Prothrombin Activation Pathway	0	0.0476	NaN	F5,PROC
Cyclins and Cell Cycle Regulation	0	0.0494	-1	ATM,CCND2,PPM1J,TGFB1
Cell Cycle Control of Chromosomal Replication	0	0.0179	NaN	RPA4
Spliceosomal Cycle	0	0.0208	NaN	SF1
Sertoli Cell-Sertoli Cell Junction Signaling	0	0.0432	NaN	ACTN1,CLDN23,ITGA4,RALB,RAP1A,TNF,TUBA4A,WAS
nNOS Signaling in Neurons	0	0.0426	NaN	PRKCD,PRKCH
nNOS Signaling in Skeletal Muscle Cells	0	0.0244	NaN	CACNA2D4
Estrogen-mediated S-phase Entry	0	0.0385	NaN	MYC
Netrin Signaling	0	0.0308	NaN	CACNA2D4,RAC2
Bupropion Degradation	0	0.04	NaN	CYP4X1
Nicotine Degradation III	0	0.0175	NaN	CYP4X1
Pyrimidine Ribonucleotides De Novo Biosynthesis	0	0.0227	NaN	NUDT18
Melatonin Degradation I	0	0.0167	NaN	CYP4X1
Pyridoxal 5'-phosphate Salvage Pathway	0	0.0303	NaN	PRKCD,PRKCH
Triacylglycerol Degradation	0	0.0426	NaN	PLA1A,PNPLA2
Estrogen Biosynthesis	0	0.0244	NaN	CYP4X1
Nicotine Degradation II	0	0.0154	NaN	CYP4X1
Serotonin Degradation	0	0.0299	NaN	ADHFE1,DHRS9
TCA Cycle II (Eukaryotic)	0	0.0417	NaN	ACO1
Triacylglycerol Biosynthesis	0	0.0476	NaN	AGPAT2,AGPAT3
Salvage Pathways of Pyrimidine Ribonucleotides	0	0.0306	NaN	PRKCD,PRKCH,UPP1
Pyrimidine Ribonucleotides Interconversion	0	0.0238	NaN	NUDT18
Glycolysis I	0	0.0385	NaN	FBP1
Gluconeogenesis I	0	0.0385	NaN	FBP1
Superpathway of Melatonin Degradation	0	0.0308	NaN	CYP4X1,MPO
Stearate Biosynthesis I (Animals)	0	0.0208	NaN	ACSL5
Acetone Degradation I (to Methylglyoxal)	0	0.0323	NaN	CYP4X1
Putrescine Degradation III	0	0.0476	NaN	SAT1
Ethanol Degradation IV	0	0.0435	NaN	ACSS1
HIPPO signaling	0	0.0471	NaN	PPM1J,PPP1R14C,SMAD3,STK4
Nucleotide Excision Repair Pathway	0	0.0286	NaN	RPA4
Protein Ubiquitination Pathway	0	0.0476	NaN	B2M,BIRC2,BIRC3,DNAJB1,DNAJC5B,HLA-E,HLA-F,HSPA2,HSPA6,IFNG,PSMB8,PSMB9,TAP1
Cell Cycle: G2/M DNA Damage Checkpoint Regulation	0	0.0204	NaN	ATM
GABA Receptor Signaling	0	0.0421	NaN	AP1G2,CACNA2D4,GABRA3,KCNN4
Insulin Receptor Signaling	0	0.05	1.134	FOXO1,INPP5D,PIK3CD,PIK3CG,PPP1R14C,RALB,RAP1A
Phototransduction Pathway	0	0.0377	NaN	GNGT2,PDE6G
Dopamine Receptor Signaling	0	0.039	NaN	PPM1J,PPP1R14C,SPR
Hypoxia Signaling in the Cardiovascular System	0	0.0405	NaN	ATM,NFKBIA,NFKBIE
BMP signaling pathway	0	0.0353	NaN	BMP2,RALB,RAP1A
Sirtuin Signaling Pathway	0	0.0344	-0.333	ARNTL,ESRRA,FOXO1,MYC,NR1H3,STAT3,TNF,TSPO,TUBA4A,UCP2
NER Pathway	0	0.0194	NaN	POLE4,RPA4
Apelin Pancreas Signaling Pathway	0	0.0455	NaN	PIK3CD,PIK3CG
White Adipose Tissue Browning Pathway	0	0.0388	2.236	ANGPT2,CACNA2D4,CAMP,FCER1A,FCER1G
Kinetochore Metaphase Signaling Pathway	0	0.0198	NaN	PPP1R14C,STAG3
Calcium Signaling	0	0.0437	2.449	ATP2A3,CACNA2D4,ITPR1,ITPR2,MYL5,RAP1A,RCAN3,TNNC2,TNNI2
