# Supplementary material for: Identification of MYCN non-amplified neuroblastoma subgroups points towards molecular signatures for precision prognosis and therapy stratification
Source: Research Square preprint supplement (doi:10.21203/rs.3.rs-478917/v1), 2021-05-28
Supplement: Supplementary file 8 [file a1cfa429e044937d51739ebd.xlsx]

## Sheet: Immune Related Pathway
Table S8. List of 46 immune-related gene sets.
Antigen Processing and Presentation	Antimicrobials	BCR Signaling Pathway	Chemokines	Chemokine Receptors	Cytokines	Cytokine Receptors	Interferons	Interferon Receptor	Interleukins	Interleukins Receptor	Natural Killer Cell Cytotoxicity	TCR signaling Pathway	TGFb Family Member	TGFb Family Member Receptor	TNF Family Members	TNF Family Members Receptors	aDCs	APC_co_inhibition	APC_co_stimulation	B_cells	CCR	CD8+_T_cells	Check-point	Cytolytic_activity	DCs	HLA	iDCs	Inflammation-promoting	Macrophages	Mast_cells	MHC_class_I	Neutrophils	NK_cells	Parainflammation	pDCs	T_cell_co-inhibition	T_cell_co-stimulation	T_helper_cells	Tfh	Th1_cells	Th2_cells	TIL	Treg	Type_I_IFN_Reponse	Type_II_IFN_Reponse
AZGP1	HAMP	CD79A	C3	C5AR1	ADIPOQ	ACVR1B	IFNA10	IFNAR2	IL11	IL10RA	HLA-A	CD3D	BMP1	ACVR1B	TNFRSF11B	TNFRSF10B	CD83	C10orf54	CD40	BACH2	CCL16	CD8A	IDO1	PRF1	CCL17	HLA-E	CD1A	CCL5	C11orf45	CMA1	B2M	EVI2B	KLRC1	CXCL10	CLEC4C	BTLA	CD2	CD4	PDCD1	IFNG	PMCH	ITM2C	IL12RB2	DDX4	GPR146
B2M	PI3	CD79B	C5	CCR1	ADM	ACVR1C	IFNA13	IFNGR1	IL12A	IL10RB	HLA-B	CD3E	BMP10	ACVR1C	TNFSF10	TNFRSF10C	LAMP3	CD274	CD58	BANK1	TPO		LAG3	GZMA	CCL22	HLA-DPB2	CD1E	CD19	CD68	MS4A2	HLA-A	HSD17B11	KLRF1	PLAT	CXCR3	C10orf54	CD226		CXCL13	TBX21	LAIR2	CD38	TMPRSS6	IFIT1	SELP
CALR	CAMP	LYN	CAMP	CCR10	ADM2	ACVR2A	IFNA14	IFNGR2	IL12B	IL11RA	HLA-C	CD3G	BMP15	ACVR2A	TNFSF11	TNFRSF10D	CCL1	LGALS9	CD70	BLK	TGFBR2		CTLA4		CD209	HLA-C		CD8B	CLEC5A	TPSAB1	TAP1	KDM6B		CCND1	GZMB	CD160	CD27		CXCR5	CTLA4	SMAD2	THEMIS2	CTSC	IFIT2	AHR
CANX	PPBP	SYK	CCL1	CCR3	AGRP	ACVR2B	IFNA16		IL13	IL12RB1	HLA-E	CD247	BMP2	ACVR2B	TNFSF12	TNFRSF11A		PDCD1LG2	ICOSLG	BTLA	CXCL2		TNFRSF9		CCL13	HLA-J		CXCL10	CYBB			MEGF9		LGMN	IL3RA	CD244	CD28			STAT4	CXCR6	GLYR1	LAPTM4B	IFIT3
CD1A	REG3G	BTK	CCL11	CCR4	AGT	ACVRL1	IFNA17		IL15	IL12RB2	HLA-G	CD4	BMP3	ACVRL1	TNFSF13	TNFRSF12A		PVRL3	SLAMF1	CD79A	CCL14		ICOS			HLA-DQB1		CXCL13	FUCA1			MNDA		PLAUR	IRF7	CD274	CD40LG			CD38	GATA3	ICOS	TFRC	IRF7
CD1B	CXCL14	BLNK	CCL13	CCR5	AMBN	ADCYAP1R1	IFNA2		IL16	IL13RA1	KIR3DL1	CD8A	BMP4	AMHR2	TNFSF13B	TNFRSF13B			TNFSF14	CD79B	TGFBR3		CD80			HLA-DQB2		CXCL9	GPNMB			NLRP12		AIM2	IRF8	CTLA4	ICOS			IL12RB2	IL26	F5	RNF145	ISG20
CD1C	CXCL16	VAV3	CCL14	CCR6	AMELX	ADIPOR1	IFNA21		IL17A	IL13RA2	KIR3DL2	CD8B	BMP5	BMPR1A	TNFSF14	TNFRSF13C			TNFSF15	FCRL1	IL11RA		PDCD1LG2			HLA-DQA2		GNLY	HS3ST2			PADI4		MMP7	LILRA4	HAVCR2	SLAMF1			LTA		TIGIT	NETO2	MX1
CD1D	SLPI	VAV1	CCL15	CCR7	AMH	ADIPOR2	IFNA4		IL17B	IL15RA	KIR2DL1	PTPRC	BMP6	BMPR1B	TNFSF15	TNFRSF14			TNFSF18	FCRL3	CCL11		TIGIT			HLA-DQA1		GZMB	LGMN			SELL		ICAM1	PHEX	LAG3	TNFRSF18			CSF2		KLRD1	ADAT2	MX2
CD1E	CXCL10	VAV2	CCL16	CCR8	ANGPTL5	ADRB1	IFNA5		IL17C	IL17RA	KIR2DL3	LCK	BMP7	BMPR2	TNFSF18	TNFRSF17			TNFSF4	HVCN1	IL4I1		CD70			HLA-A		IFNG	MMP9			TRANK1		MX2	PLD4	LAIR1	TNFRSF25					IRF4	CHST2	RSAD2
CD4	CXCL9	RAC1	CCL17	CCR9	ANGPTL7	ADRB2	IFNA6		IL17D	IL17RB	KIR2DL4	FYN	BMP8A	TGFBR1	TNFSF4	TNFRSF18			TNFSF8	RALGPS2	IL33		TNFSF9			HLA-DMA		IL12A	TM4SF19			VNN3		CXCL9	PTCRA	TIGIT	TNFRSF4					PRKCQ	CTLA4	TNFSF10
CD8A	CXCL5	RAC2	CCL18	CCRL2	APLN	AGTR1	IFNA7		IL17F	IL17RC	KLRC1	ZAP70	BMP8B	TGFBR2	TNFSF8	TNFRSF19			TNFSF9		CXCL12		ICOSLG			HLA-DOB		IL12B						ANXA1			TNFRSF8					FCRL5	NFE2L3
CD8B	CXCL11	RAC3	CCL19	CMKLR1	AREG	AGTR2	IFNA8		IL18	IL17RD	KLRC2	LCP2	GDF1	TGFBR3	TNFSF9	TNFRSF1A					CXCL10		KIR3DL1			HLA-DRB1		IRF1						TLR2			TNFRSF9					SIRPG	LIMA1
CD74	CXCL6	PPP3CA	CCL2	CX3CR1	ARTN	AMHR2	IFNB1		IL19	IL17RE	KLRC3	LAT	GDF10			TNFRSF1B					BMPER		CD86			HLA-H		PRF1						PLA2G2D			TNFSF14					LPXN	IL1R2
CREB1	CXCL1	PPP3CB	CCL20	CXCR3	AVP	ANGPT1	IFNE		IL1A	IL18R1	KLRD1	ITK	GDF11			TNFRSF21					BMP8A		PDCD1			HLA-B		STAT1						ITGA2								IL2RG	ICOS
CTSB	CXCL12	PPP3CC	CCL21	CXCR4	AZU1	ANGPT4	IFNG		IL1B	IL18RAP	PTPN6	TEC	GDF15			TNFRSF25					CXCL11		LAIR1			HLA-DRB5		TBX21						MX1								CCL5	HSDL2
CTSE	CXCL13	PPP3R1	CCL22	CXCR5	BDNF	ANGPTL1	IFNK		IL1F10	IL1R1	PTPN11	NCK1	GDF2			TNFRSF4					IL21R		TNFRSF8			HLA-DOA								HMOX1								LCK	HTATIP2
CTSS	CXCL2	PPP3R2	CCL23	CXCR6	BMP1	ANGPTL2	IFNW1		IL1RN	IL1R2	ICAM1	NCK2	GDF3			TNFRSF6B					IL17B		TNFSF15			HLA-DPB1								CD276								TRAF3IP3	FKBP1A
FCER1G	PF4	CHP2	CCL24	CYSLTR1	BMP10	ANGPTL3			IL2	IL1RAP	ICAM2	VAV3	GDF5			TNFRSF8					TNFRSF9		TNFRSF14			HLA-DRA								TIRAP								CD86	TIGIT
FCGRT	XCL1	NFAT5	CCL25	CYSLTR2	BMP15	ANGPTL4			IL20	IL1RL1	ITGAL	VAV1	GDF6			TNFRSF9					ILF2		IDO2			HLA-DRB6								IL33								MAL	CCR8
PDIA3	CXCL3	NFATC1	CCL26	EDNRA	BMP2	ANGPTL6			IL21	IL1RL2	ITGB2	VAV2	GDF7								CX3CR1		CD276			HLA-L								PTGES								LILRB1	LTA
HFE	DEFB103A	NFATC2	CCL27	EDNRB	BMP3	APLNR			IL22	IL20RA	PTK2B	GRAP2	GDF9								CCR8		CD40			HLA-F								TNFRSF12A								DOK2	SLC35F2
HLA-A	CCL13	NFATC3	CCL28	FPR1	BMP4	AR			IL23A	IL20RB	VAV3	GRB2	GDNF								TNFSF12		TNFRSF4			HLA-G								SCARB1								CD6	IL21R
HLA-B	CCL1	NFATC4	CCL3	FPR2	BMP5	AVPR1A			IL24	IL21R	VAV1	PAK1	INHA								CSF3		TNFSF14			HLA-DMB								CD14								PAG1	AHCYL1
HLA-C	DEFB1	HRAS	CCL3L3	GPR17	BMP6	AVPR1B			IL25	IL22RA1	VAV2	PAK2	INHBA								TNFSF4		HHLA2			HLA-DPA1								BLNK								LAX1	SOCS2
HLA-DMA	CCL8	KRAS	CCL4	GPR32	BMP7	AVPR2			IL26	IL22RA2	RAC1	PAK3	INHBB								BMP3		CD244											IFIT3								PLEK	ETV7
HLA-DMB	ELANE	NRAS	CCL4L2	GPR33	BMP8A	BMPR1A			IL27	IL23R	RAC2	PAK4	INHBC								CX3CL1		CD274											RETNLB								PIK3CD	BCL2L1
HLA-DOA	DEFB103B	FOS	CCL5	LTB4R	BMP8B	BMPR1B			IL3	IL27RA	RAC3	PAK6	INHBE								BMP5		HAVCR2											IFIT2								SLAMF1	RRAGB
HLA-DOB	DEFA3	JUN	CCL7	LTB4R2	BTC	BMPR2			IL31	IL2RA	PAK1	RHOA	LEFTY1								CXCR2		CD27											ISG15								XCL1	ACSL4
HLA-DPA1	DEFA1	CARD11	CCL8	PLAUR	C3	BRD8			IL32	IL2RB	MAP2K1	CDC42	LEFTY2								TNFRSF10D		BTLA											OAS2								GPR171	CHRNA6
HLA-DPB1	TMSB10	BCL10	CKLF	PLXNA1	C5	C3AR1			IL33	IL2RG	MAP2K2	PPP3CA	NODAL								BMP2		LGALS9											REL								XCL2	BATF
HLA-DQA1	DEFA6	MALT1	CMA1	PLXNA2	CALCA	C5AR1			IL34	IL31RA	MAPK1	PPP3CB	TGFB1								CXCL14		TMIGD2											OAS3								TBX21	LAX1
HLA-DQA2	DEFA5	CHUK	CTSG	PLXNA3	CALCB	CALCR			IL4	IL3RA	MAPK3	PPP3CC	TGFB2								CCL28		CD28											CD44								CD2	ADPRH
HLA-DQB1	DEFA4	IKBKB	CX3CL1	PLXNA4	CAMP	CALCRL			IL5	IL4R	TNF	PPP3R1	TGFB3								CXCL3		CD48											PPARG								CD53	TNFRSF4
HLA-DRA	LCN2	IKBKG	CXCL1	PLXNB1	CAT	CCR1			IL6	IL5RA	CSF2	PPP3R2									BMP6		TNFRSF25											BST2								KLHL6	ANKRD10
HLA-DRB1	LCN1	NFKB1	CXCL10	PLXNB2	CCK	CCR10			IL6ST	IL6R	IFNG	CHP2									CCL21		CD40LG											OAS1								SLAMF6	CD274
HLA-DRB5	COLEC10	RELA	CXCL11	PLXNB3	CCL1	CCR3			IL7	IL7R	NCR2	NFAT5									CXCL9		ADORA2A											NOX1								CD40	CASP1
HLA-E	BPI	NFKBIA	CXCL12	PLXNC1	CCL11	CCR4			IL9	IL9R	TYROBP	NFATC1									CCL23		VTCN1											PLA2G2A								SIT1	LY75
HLA-F	S100A9	NFKBIB	CXCL13	PLXND1	CCL13	CCR5			TXLNA		LCK	NFATC2									IL6		CD160											IFIT1								TNFRSF4	NPTN
HLA-G	S100A8	NFKBIE	CXCL14	PTAFR	CCL14	CCR6					FCGR3A	NFATC3									TNFRSF18		CD44											IFITM3								CD79A	SSTR3
MR1	DCD	CD81	CXCL16	ROBO1	CCL15	CCR7					FCGR3B	NFATC4									IL17RD		TNFSF18											IL1RN								CD247	GRSF1
HSPA1A	LCN6	CD19	CXCL17	ROBO2	CCL16	CCR8					NCR1	SOS1									IL17D		TNFRSF18																			LCP2	CSF2RB
HSPA1B	S100A12	CR2	CXCL2	ROBO3	CCL17	CCR9					NCR3	SOS2									IL27		BTNL2																			CD3D	TMEM184C
HSPA1L	HTN3	PIK3R5	CXCL3	RXFP3	CCL18	CCRL2					FCER1G	HRAS									CCL7		C10orf54																			CD27	NDFIP2
HSPA2	LCN8	PIK3R1	CXCL5	XCR1	CCL19	CD40					CD247	KRAS									IL1R1		CD200R1																			SH2D1A	ZBTB38
HSPA4	CCR10	PIK3R2	CXCL6		CCL2	CMKLR1					ZAP70	NRAS									CXCR4		TNFSF4																			FYB	ERI1
HSPA5	CELA1	PIK3R3	CXCL9		CCL20	CNTFR					SYK	FOS									CXCR2P1		CD200																			ARHGAP30	TRAF3
HSPA6	DEFB106A	PIK3CA	CYR61		CCL21	CRHR1					LCP2	JUN									TGFB1I1		NRP1																			ACAP1	NAB1
HSPA8	PENK	PIK3CB	DEFA1		CCL22	CRHR2					LAT	CARD11									IFNGR1																					CST7	HS3ST3B1
HSP90AA1	MMP12	PIK3CD	DEFA3		CCL23	CRIM1					PLCG1	BCL10									IL9R																					CD3G	LAYN
HSP90AB1	LEAP2	PIK3CG	DEFA5		CCL24	CRLF1					PLCG2	MALT1									IL1RAPL1																					IL2RB	JAK1
ICAM1	SFTPD	AKT3	DEFB1		CCL25	CRLF2					SH3BP2	CHUK									IL11																					CD3E	VDR
IFNA1	LCN9	AKT1	DEFB103A		CCL26	CRLF3					PIK3CA	IKBKB									CSF1																					FCRL3	LEPROT
IFNA2	PTGDS	AKT2	DEFB104A		CCL27	CSF1R					PIK3CB	IKBKG									IL20RA																					CORO1A	GCNT1
IFNA4	TMSB4X	GSK3B	EDN1		CCL28	CSF2RA					PIK3CD	NFKB1									IL25																					ITK	PTPRJ
IFNA5	PGLYRP1	INPP5D	EDN2		CCL3	CSF2RB					PIK3CG	RELA									TNFRSF4																					TCL1A	IKZF2
IFNA6	ZC3HAV1	CD22	EDN3		CCL3L3	CSF3R					PIK3R5	NFKBIA									IL18																					CYBB	CSF1
IFNA7	TMSB15A	CD72	FGF10		CCL4	CX3CR1					PIK3R1	NFKBIB									ILF3																					CSF2RB	ENTPD1
IFNA8	S100B	PTPN6	FGF2		CCL4L2	CXCR3					PIK3R2	NFKBIE									CCL20																					IKZF1	TNFRSF18
IFNA10	S100A13	LILRB3	HTN3		CCL5	CXCR4					PIK3R3	CD28									TNFRSF12A																					NCF4	METTL7A
IFNA13	S100A6	FCGR2B	LECT2		CCL7	CXCR5					FYN	ICOS									IL6ST																					DOCK2	KSR1
IFNA14	DEFB119	RASGRP3	PF4		CCL8	CXCR6					SHC2	CD40LG									CXCL13																					CCR2	SSH1
IFNA16	DEFB107A	PLCG2	PF4V1		CD320	CYSLTR1					SHC4	PIK3R5									IL12B																					PTPRC	CADM1
IFNA17	DEFB105A	PRKCB	PLAU		CD40LG	CYSLTR2					SHC3	PIK3R1									TNFRSF8																					PLAC8	IL1R1
IFNA21	SERPIND1	IFITM1	PPBP		CD70	EDNRA					SHC1	PIK3R2									IL6R																					NCKAP1L	ACP5
IFNG	DEFB129		PROK2		CECR1	EDNRB					GRB2	PIK3R3									BMPR2																					IL7R	CHST7
KIR2DL1	DEFB127		RNASE2		CER1	EGFR					SOS1	PIK3CA									IFNE																					2021-09-06	THADA
KIR2DL3	S100P		SAA1		CGA	ENG					SOS2	PIK3CB									IL1RAPL2																					CD28	CD177
KIR2DL4	S100A7		SAA2		CGB1	EPOR					HRAS	PIK3CD									IL3RA																					STAT4	NFAT5
KIR3DL1	DEFB104A		SBDS		CGB2	ESR1					KRAS	PIK3CG									BMP4																					CD8A	ZNF282
KIR3DL2	DEFB126		SEMA3A		CGB5	ESR2					NRAS	AKT3									CCL24																					LY9	MAGEH1
KLRC1	DEFB106B		SEMA3B		CGB7	ESRRA					ARAF	AKT1									TNFSF13B																					CD48
KLRC2	DEFB104B		SEMA3C		CGB8	ESRRB					BRAF	AKT2									CCR4																					HCST
KLRC3	DEFB107B		SEMA3D		CHGA	ESRRG					RAF1	MAP3K8									IL2RA																					PTPRCAP
KLRD1	PGLYRP3		SEMA3E		CHGB	FGFR1					MICA	MAP3K14									IL32																					SASH3
LTA	PGLYRP2		SEMA3F		CKLF	FGFR2					MICB	PDCD1									TNFRSF10C																					ARHGAP25
CIITA	S100A10		SEMA3G		CLCF1	FGFR3					ULBP3	CTLA4									IL22RA1																					LAT
MICA	S100A2		SEMA4A		CLEC11A	FGFR4					ULBP2	PTPN6									BMPR1A																					TRAT1
MICB	DEFB125		SEMA4B		CMA1	FGFRL1					ULBP1	CBLC									CXCR5																					IL10RA
NFYA	DEFB123		SEMA4C		CMTM1	FLT1					KLRK1	CBL									CXCR3																					PAX5
NFYB	DEFB105B		SEMA4D		CMTM2	FLT3					HCST	CBLB									IFNA8																					CCR7
NFYC	DEFB132		SEMA4F		CMTM3	FLT4					CD48	IL2									IL17REL																					DOCK11
LGMN	LCN12		SEMA4G		CMTM4	FPR1					CD244	IL4									IFNB1																					PARVG
PSMB8	PGLYRP4		SEMA5A		CMTM5	FPR2					PPP3CA	IL5									IFNAR1																					SPNS1
PSMC1	S100A11		SEMA5B		CMTM6	FSHR					PPP3CB	IL10									TNFRSF1B																					CD52
PSMC2	S100A5		SEMA6A		CMTM7	GALR2					PPP3CC	IFNG									CCL17																					HCLS1
PSMC3	S100A3		SEMA6B		CMTM8	GALR3					PPP3R1	CSF2									IFNL1																					ARHGAP9
PSMC4	S100A1		SEMA6C		CNTF	GCGR					PPP3R2	TNF									IL16																					GIMAP6
PSMC5	DEFB128		SEMA6D		CORT	GHR					CHP2	CDK4									IL1RL1																					PRKCB
PSMC6	DEFB108B		SEMA7A		CRH	GHRHR					NFAT5	RASGRP1									ILK																					MS4A1
PSMD1	HTN1		SLIT1		CSF1	GHSR					NFATC1	PDK1									CCL25																					GPR18
PSMD2	LMBR1L		SLIT2		CSF2	GIPR					NFATC2	PLCG1									ILDR2																					TBC1D10C
PSMD3	S100A7A		TNC		CSF3	GLP1R					NFATC3	PRKCQ									CXCR1																					GVINP1
PSMD4	DEFB118		TYMP		CSH1	GLP2R					NFATC4										IL36RN																					P2RY8
PSMD5	COLEC12		XCL1		CSH2	GNRHR					PRKCA										IL34																					EVI2B
PSMD7	TMSB4Y		XCL2		CSHL1	GPR17					PRKCB										TGFB1																					VAMP5
PSMD8	DEFB131				CSPG5	GPR32					PRKCG										IFNG																					KLRK1
PSMD10	DEFB134				CTF1	GPR33					SH2D1B										IL19																					SELL
PSMD11	DEFB130				CTGF	HNF4A					SH2D1A										ILKAP																					MPEG1
PSMD13	DEFB124				CTSG	HNF4G					IFNGR1										BMP2K																					MS4A6A
PSME1	DEFB121				CX3CL1	HTR3A					IFNGR2										CCR10																					ARHGAP15
PSME2	DEFB116				CXCL1	HTR3B					IFNA1										ILDR1																					MFNG
RELB	DEFB115				CXCL10	HTR3C					IFNA2										EPO																					GZMK
RFX5	DEFB114				CXCL11	HTR3D					IFNA4										CCR7																					SELPLG
RFXAP	DEFB113				CXCL12	HTR3E					IFNA5										IL17C																					TARP
SLC10A2	DEFB112				CXCL13	IFNAR1					IFNA6										IL23A																					GIMAP7
TAP1	DEFB110				CXCL14	IFNAR2					IFNA7										CCR5																					FAM65B
TAP2	TMSB15B				CXCL16	IFNGR1					IFNA8										IL7																					INPP5D
TAPBP	DEFB133				CXCL17	IFNGR2					IFNA10										EPOR																					ITGA4
THBS1	S100Z				CXCL2	IGF1R					IFNA13										CCL13																					MZB1
KLRC4	MAVS				CXCL3	IGF2R					IFNA14										IL2RG																					GPSM3
AP3B1	S100A14				CXCL5	IL10RA					IFNA16										IL31RA																					STK10
RFXANK	LCN10				CXCL6	IL10RB					IFNA17										TNFAIP6																					CLEC2D
PSMD6	S100A16				CXCL9	IL11RA					IFNA21										IFNL2																					IL16
PSME3	DEFB136				CYR61	IL12RB1					IFNB1										BMP1																					NLRC3
PSMD14	ZC3HAV1L				DEFA1	IL12RB2					IFNAR1										IL12RB1																					GIMAP5
CLEC4M	S100A7L2				DEFA3	IL13RA1					IFNAR2										TNFAIP8																					GIMAP4
IFI30	IFNAR1				DEFA5	IL13RA2					TNFSF10										IL4R																					IFFO1
PROCR	AZU1				DEFB1	IL15RA					TNFRSF10D										TNFRSF6B																					CFH
ADRM1	S100G				DEFB103A	IL17RA					TNFRSF10C										TNFAIP8L1																					PVRIG
KIAA0368	TCHHL1				DEFB104A	IL17RB					TNFRSF10B										TNFRSF10B																					CFHR1
TRPC4AP	TINAGL1				DKK1	IL17RC					TNFRSF10A										IFNL3
CD209	IFNGR1				EBI3	IL17RD					FASLG										CCL5
UBXN1	SLC22A17				EDN1	IL17RE					FAS										CXCL6
ERAP1	WFIKKN1				EDN2	IL18R1					GZMB										CXCL1
TAPBPL	WFDC2				EDN3	IL18RAP					PRF1										CCR3
ERAP2	IL6				EGF	IL1R1					CASP3										TNFSF11
ULBP3	UMODL1				EPGN	IL1R2					BID										CSF1R
ULBP2	TGFB1				EPO	IL1RAP															IL21
ULBP1	PF4V1				EREG	IL1RL1															IL1RAP
KIR3DL3	MMP9				ESM1	IL1RL2															IL12RB2
RAET1E	TLR4				FAM3B	IL20RA															CCL1
RAET1L	IFNG				FAM3C	IL20RB															IL17RA
UBR1	SPAG11B				FAM3D	IL21R															CCR1
RAET1G	A2M				FASLG	IL22RA1															IL1RN
PDIA2	NFKB1				FGF1	IL22RA2															TNFRSF11B
	APOBEC3G				FGF10	IL23R															TNFRSF14
	FABP6				FGF11	IL27RA															IL13
	NOD2				FGF12	IL2RA															IL2RB
	MBL2				FGF13	IL2RB															BMP8B
	RBP1				FGF14	IL2RG															CCL2
	TLR2				FGF16	IL31RA															IL24
	SLC40A1				FGF17	IL3RA															IL18RAP
	PLAU				FGF18	IL4R															TGFBI
	IL1B				FGF19	IL5RA															TNFSF10
	PAEP				FGF2	IL6R															TNFRSF11A
	HFE2				FGF20	IL7R															CXCL5
	MUC5AC				FGF21	IL9R															IL5RA
	CTSS				FGF22	INSR															TNFSF9
	OBP2A				FGF23	KDR															IL1RL2
	PLTP				FGF3	LEPR															TNFRSF13C
	MX1				FGF4	LGR4															IL36G
	DDX58				FGF5	LGR5															IL15RA
	IRF3				FGF6	LGR6															TNFRSF21
	SFTPA2				FGF7	LHCGR															CXCL8
	LPA				FGF8	LIFR															IL22RA2
	LBP				FGF9	LTB4R															TNFAIP8L2
	RBP4				FIGNL2	LTB4R2															IL18R1
	SFTPA1				FLT3LG	LTBR															IFNLR1
	NOX4				FSHB	MC1R															CXCR6
	LTF				GAL	MC2R															CCL3L3
	IFNB1				GALP	MC3R															TNFRSF1A
	RBP5				GAST	MC4R															IL17RE
	FABP7				GCG	MCHR1															IFNGR2
	FABP5				GDF1	MCHR2															IL17RC
	FABP3				GDF10	MET															TNFAIP8L3
	FABP2				GDF11	MLNR															ILVBL
	FABP4				GDF15	MPL															TGFBRAP1
	R3HDML				GDF2	MTNR1A															CCL4L1
	OASL				GDF3	MTNR1B															CSF2RA
	CRABP2				GDF5	NGFR															CCRN4L
	CRABP1				GDF6	NMBR															CCL26
	RBP7				GDF7	NPR1															TNFAIP1
	DUOX1				GDF9	NPR3															CCRL2
	OBP2B				GDNF	NR0B1															IFNA10
	RBP2				GH1	NR0B2															TNFRSF17
	LCN15				GH2	NR1D1															IFNA13
	CETP				GHRH	NR1D2															IL20
	FABP12				GHRL	NR1H2															IL18BP
	FABP9				GIP	NR1H3															CCL3L1
	LCNL1				GKN1	NR1H4															TNFSF12-TNFSF13
	C8G				GMFB	NR1I2															IL5
	SPAG11A				GMFG	NR1I3															IL23R
	PI15				GNRH1	NR2C1															IL26
	NOX1				GNRH2	NR2C2															TNF
	PMP2				GPHA2	NR2E1															TGFA
	APOD				GPHB5	NR2E3															CSF2
	ORM2				GPI	NR2F1															IL1F10
	ORM1				GREM1	NR2F2															CXCL17
	TNF				GREM2	NR2F6															TNFSF13
	CTSG				GRN	NR3C1															IFNA4
	PRTN3				GRP	NR3C2															IL37
	MAPK1				GUCA2A	NR4A1															IL12A
	PML				HAMP	NR4A2															IL7R
	AEN				HBEGF	NR4A3															IFNA1
	CYBB				HDGF	NR5A1															IL1A
	ISG20				HGF	NR5A2															IL4
	BCL3				HTN3	NR6A1															IL2
	ISG20L2				IAPP	NRP1															CCL22
	NOX5				IFNA1	NRP2															CSF3R
	NOX3				IFNA10	OGFR															IL10
	DUOX2				IFNA13	OPRD1															IFNK
	TLR3				IFNA14	OPRK1															TGFB2
	TFRC				IFNA16	OPRL1															IL1R2
	IFIH1				IFNA17	OPRM1															IL1B
	LRP1				IFNA2	OSMR															IL17F
	TRIM5				IFNA21	OXTR															IL27RA
	IDO1				IFNA4	PGR															IL15
	GDF15				IFNA5	PGRMC2															TNFSF8
	NEDD4				IFNA6	PLAUR															IL36B
	ADIPOQ				IFNA7	PLXNA1															XCL1
	STAT3				IFNA8	PLXNA2															CXCL16
	STAT1				IFNB1	PLXNA3															TNFRSF19
	SOCS3				IFNE	PLXNA4															IL3
	SEMG1				IFNG	PLXNB1															CCL3
	TNFSF10				IFNK	PLXNB2															IFNA2
	CCL20				IFNW1	PLXNB3															BMPR1B
	SOCS1				IGF1	PLXNC1															IFNA21
	RNASEL				IGF2	PLXND1															TNFSF18
	IRF1				IL10	PPARA															CCL8
	IL15				IL11	PPARD															IL17RB
	APOBEC3F				IL12A	PPARG															TNFRSF25
	RARRES3				IL12B	PRLHR															IL22
	CHIT1				IL13	PRLR															IL10RB
	IFNA1				IL15	PTAFR															IFNAR2
	CD40				IL16	PTGDR															CCL18
	TLR7				IL17A	PTGDS															IFNA16
	PPIA				IL17B	PTGER1															CSF2RB
	HFE				IL17C	PTGER2															IL36A
	ZYX				IL17D	PTGER3															TNFAIP3
	NLRX1				IL17F	PTGER4															IL13RA2
	PGC				IL18	PTGFR															IL13RA1
	VEGFA				IL19	PTH1R															CCR9
	IKBKE				IL1A	PTH2R															TNFRSF10A
	ISG15				IL1B	RARA															IFNA7
	DHX58				IL1F10	RARB															IFNW1
	TNFAIP3				IL1RN	RARG															XCL2
	TFR2				IL2	ROBO1															TNFSF14
	FCN2				IL20	ROBO2															CCR2
	MUC4				IL21	ROBO3															BMP15
	F2R				IL22	RORA															BMP10
	ELN				IL23A	RORB															CCL15-CCL14
	IL27				IL24	RORC															TGFBR1
	MAPT				IL25	RXFP1															IFNA5
	LYZ				IL26	RXFP2															BMP7
	CCL5				IL27	RXFP3															IFNA14
	LEP				IL3	RXRA															IL20RB
	CYLD				IL31	RXRB															IL10RA
	KLKB1				IL32	RXRG															IFNA17
	CST4				IL33	S1PR1															CCR6
	CSRP1				IL34	S1PR2															TGFB3
	MAPK14				IL4	SCTR															CCL15
	JUN				IL5	SDC1															CCL4
	ITGAV				IL6	SDC2															CCL27
	IRF5				IL6ST	SDC3															TNFRSF13B
	CCR6				IL7	SDC4															TNFAIP2
	IL12B				IL9	SORT1															IL31
	TLR8				INHA	SSTR1															IL17A
	GNLY				INHBA	SSTR2															TNFSF15
	CD81				INHBB	SSTR5															CCL19
	EIF2AK2				INHBC	TACR1															IFNA6
	APOM				INHBE	TEK															IL9
	CACYBP				INS	TGFBR1
	NOD1				INS-IGF2	TGFBR2
	MAPK8				INSL3	TGFBR3
	MAPK3				INSL4	THRA
	BST2				INSL5	THRB
	BPHL				INSL6	TIE1
	PLA2G2A				JAG1	TNFRSF10A
	GRN				JAG2	TNFRSF10B
	PDGFRA				KITLG	TNFRSF10C
	GNAI1				KL	TNFRSF10D
	WNT5A				LACRT	TNFRSF11A
	FURIN				LECT2	TNFRSF12A
	ADAR				LEFTY1	TNFRSF13B
	TYK2				LEFTY2	TNFRSF13C
	NOS2				LEP	TNFRSF14
	TRAF3				LHB	TNFRSF17
	TPT1				LIF	TNFRSF18
	TPM2				LRSAM1	TNFRSF19
	NEO1				LTA	TNFRSF1A
	AHNAK				LTB	TNFRSF1B
	TLR1				LTBP1	TNFRSF21
	TK2				LTBP2	TNFRSF25
	PRDX2				LTBP3	TNFRSF4
	MX2				LTBP4	TNFRSF6B
	FGF2				MDK	TNFRSF8
	FGA				MIA	TNFRSF9
	TCF7L2				MIF	TRHR
	F2RL1				MLN	TSHR
	MSR1				MSTN	TUBB3
	NFKBIZ				NAMPT	VDR
	LMBR1				NDP	VIPR1
	SRC				NENF	VIPR2
	MPO				NGF	XCR1
	ELAVL1				NMB
	ROBO3				NODAL
	SP1				NOV
	SOD1				NPFF
	PDF				NPPA
	DLL4				NPPB
	ECD				NPPC
	SLC11A1				NPY
	DMBT1				NRG1
	TMEM173				NRG2
	SKIV2L				NRG3
	SEMG2				NRG4
	LTA				NRTN
	DES				NTF3
	DCK				NTF4
	DAXX				NTS
	TNFRSF10A				NUDT6
	TNFRSF10B				OGN
	EED				OSGIN1
	CCL4				OSM
	LIMS1				OSTN
	LALBA				OXT
	APOBEC3H				PDGFA
	TMPRSS6				PDGFB
	SPINK5				PDGFC
	MARCO				PDGFD
	BECN1				PDGFRA
	TNFSF11				PDGFRB
	KNG1				PDGFRL
	CSK				PDYN
	KLRK1				PENK
	KCNH2				PF4
	JUND				PF4V1
	JAK1				PGF
	CREB1				PLAU
	CLDN4				PMCH
	CCL28				PNOC
	RNASE3				POMC
	IRF7				PPBP
	IREB2				PPY
	ILK				PRL
	IL18				PRLH
	IL17A				PROK1
	LTB4R				PROK2
	APOBEC3A				PSPN
	MASP2				PTH
	TRIM27				PTH2
	RELA				PTHLH
	IL7R				PTN
	IL1A				PYY
	PTX3				QRFP
	IFNAR2				RABEP1
	SYTL1				RABEP2
	APOBEC3C				REG1A
	DDX17				RETN
	PTGS2				RETNLB
	HTR1A				RLN1
	CD40LG				RLN2
	CD14				RLN3
	CD8A				RNASE2
	CD4				S100A6
	MASP1				SAA1
	PROC				SAA2
	MAP2K2				SBDS
	MAP2K1				SCG2
	HRG				SCGB3A1
	NDRG1				SCT
	IRF9				SECTM1
	TRIM22				SEMA3A
	LANCL1				SEMA3B
	PPP4C				SEMA3C
	HMOX1				SEMA3D
	HMGB1				SEMA3E
	HLA-B				SEMA3F
	RNASE7				SEMA3G
	ABCC4				SEMA4A
	HGF				SEMA4B
	HDAC1				SEMA4C
	PLSCR1				SEMA4D
	B2M				SEMA4F
	BACH2				SEMA4G
	TANK				SEMA5A
	PIK3CG				SEMA5B
	ARRB1				SEMA6A
	RSAD2				SEMA6B
	STAB2				SEMA6C
	TBK1				SEMA6D
	PDYN				SEMA7A
	PDGFRB				SLIT1
	PDCD1				SLIT2
	PCSK2				SLURP1
	PCSK1				SPP1
	ARG2				SST
	AQP9				STC1
	FASLG				STC2
	APOH				TAC1
	BIRC5				TDGF1
	ANXA6				TG
	IL22				TGFA
	VTN				TGFB1
	VIM				TGFB2
	VCAM1				TGFB3
	PRDX1				THPO
	GFAP				TNC
	GBP2				TNF
	ALB				TNFRSF11B
	SLC29A3				TNFSF10
	OAS1				TNFSF11
	AGER				TNFSF12
	UNC93B1				TNFSF13
	TNFSF4				TNFSF13B
	NOS1				TNFSF14
	ACTG1				TNFSF15
	ACTA1				TNFSF18
	ACO1				TNFSF4
	SERPINA3				TNFSF8
	CCL15				TNFSF9
	CCL14				TOR2A
	CCL16				TRH
	CCL19				TSHB
	CCL18				TSLP
	CCL17				TXLNA
	CCL26				TYMP
	CCL22				UCN
	CCR3				UCN2
	CCL4L2				UCN3
	CCR7				UTS2
	CCL27				VEGFA
	CCR8				VEGFB
	CCL2				VEGFC
	CCL21				VGF
	CCL7				VIP
	CCL3				XCL1
	CCL11				XCL2
	CCR5
	CCL23
	CCL25
	CCL3L3
	CCR1
	CCL24
	XCL2
	CXCR4
	CXCR6
	CCR4
	FAM19A5
	FAM19A3
	FAM19A4
	FAM19A1
	FAM19A2
	PTK2B
	IL4
	CDH1
	LTBP1
	IL13
	IL10
	IL2
	PPARG
	FGR
	MIF
	CRP
	JAK2
	PTK2
	PTGDR
	CD86
	HCK
	VDR
	OLR1
	TXK
	RNASE2
