# Supplementary material for: Identification of MYCN non-amplified neuroblastoma subgroups points towards molecular signatures for precision prognosis and therapy stratification
Source: Research Square preprint supplement (doi:10.21203/rs.3.rs-478917/v1), 2021-05-28
Supplement: Supplementary file 9 [file c2a6d18738f147381f09690f.xlsx]

## Sheet: Subgroup1 Potential Targets
Table S9. Analysis of clinically actionable genes and drug response.
Gene	Drug	Spearman.Correlation.Coefficent	P.value	Group	logFCsub1	adj.P.Valsub1	logFCsub2	adj.P.Valsub2	logFCsub3	adj.P.Valsub3	drug_id	synonyms	pathway_name	targets	pubchem	Mean_CERES	ACH.000078	ACH.000099	ACH.000120	ACH.000227	ACH.000259	ACH.000260	ACH.000310	ACH.000312	ACH.000341	ACH.000366	ACH.000804	ACH.001300	ACH.001301	ACH.001302	ACH.001303	ACH.001344	ACH.001354	ACH.001366	ACH.001548	ACH.001674
DNM1L	Wee1 Inhibitor	-0.546443	0.00784173	Subgroup1	0.630216	1.12e-119	-0.376757	8.51e-25	-0.560309	5.84e-63	1046	681640, Wee1 Inhibitor	Cell cycle	WEE1, CHEK1	10384072	-0.640213	-0.861902	-0.862962	-0.381928	-0.550021	-0.955762	-0.567517	-0.392422	-0.562781	-0.286115	-0.526229	-0.86285	-0.781894	-0.491909	-0.553109	-1.15691	-0.684689	-0.533989	-0.724575	-0.742382	-0.324315
DNM1L	Dasatinib	0.598814	0.00305681	Subgroup1	0.630216	1.12e-119	-0.376757	8.51e-25	-0.560309	5.84e-63	1079	BMS-354825-03, BMS-354825, Sprycel	Other, kinases	ABL, SRC, Ephrins, PDGFR, KIT	3062316	-0.640213	-0.861902	-0.862962	-0.381928	-0.550021	-0.955762	-0.567517	-0.392422	-0.562781	-0.286115	-0.526229	-0.86285	-0.781894	-0.491909	-0.553109	-1.15691	-0.684689	-0.533989	-0.724575	-0.742382	-0.324315
EXOC4	Navitoclax	-0.581818	0.00655376	Subgroup1	0.713595	3.58e-96	-0.495379	1.61e-27	-0.57335	8.71e-42	1011	ABT-263, ABT263, ABT 263	Apoptosis regulation	BCL2, BCL-XL, BCL-W	24978538	-0.707663	-0.750906	-0.710744	-0.726775	-0.669212	-0.594138	-0.707772	-0.807543	-0.776622	-0.994018	-0.672938	-0.628024	-1.01293	-0.865849	-0.680375	-0.741108	-0.0960205	-0.739724	-0.632299	-0.703205	-0.643066
EXOC4	Telomerase Inhibitor IX	-0.591897	0.00349107	Subgroup1	0.713595	3.58e-96	-0.495379	1.61e-27	-0.57335	8.71e-42	1930	MST-312, MST 312, MST312	Genome integrity	Telomerase	10385095	-0.707663	-0.750906	-0.710744	-0.726775	-0.669212	-0.594138	-0.707772	-0.807543	-0.776622	-0.994018	-0.672938	-0.628024	-1.01293	-0.865849	-0.680375	-0.741108	-0.0960205	-0.739724	-0.632299	-0.703205	-0.643066
EXOC4	Mirin	-0.591228	0.00886209	Subgroup1	0.713595	3.58e-96	-0.495379	1.61e-27	-0.57335	8.71e-42	1048	-	Genome integrity	MRE11	none	-0.707663	-0.750906	-0.710744	-0.726775	-0.669212	-0.594138	-0.707772	-0.807543	-0.776622	-0.994018	-0.672938	-0.628024	-1.01293	-0.865849	-0.680375	-0.741108	-0.0960205	-0.739724	-0.632299	-0.703205	-0.643066
EXOC4	PCI-34051	-0.691228	0.00143375	Subgroup1	0.713595	3.58e-96	-0.495379	1.61e-27	-0.57335	8.71e-42	1621	AK298746	Chromatin histone acetylation	HDAC8, HDAC6, HDAC1	24753719	-0.707663	-0.750906	-0.710744	-0.726775	-0.669212	-0.594138	-0.707772	-0.807543	-0.776622	-0.994018	-0.672938	-0.628024	-1.01293	-0.865849	-0.680375	-0.741108	-0.0960205	-0.739724	-0.632299	-0.703205	-0.643066
ISL1	Venetoclax	-0.66502	0.000728653	Subgroup1	0.740574	1.13e-45	0.150012	0.0333265	-1.18491	1.4e-85	1909	ABT-199, Veneclexta, GDC-0199	Apoptosis regulation	BCL2	49846579	-0.671073	-1.09896	-1.04498	-0.477895	-1.69596	-0.858859	-0.572923	-0.38332	-0.979561	-1.07572	-0.602544	-0.267649	-1.21527	-0.912925	0.290603	-0.845189	0.0311112	0.28146	-0.530937	-0.335109	-1.12683
ISL1	Navitoclax	-0.655844	0.0016277	Subgroup1	0.740574	1.13e-45	0.150012	0.0333265	-1.18491	1.4e-85	1011	ABT-263, ABT263, ABT 263	Apoptosis regulation	BCL2, BCL-XL, BCL-W	24978538	-0.671073	-1.09896	-1.04498	-0.477895	-1.69596	-0.858859	-0.572923	-0.38332	-0.979561	-1.07572	-0.602544	-0.267649	-1.21527	-0.912925	0.290603	-0.845189	0.0311112	0.28146	-0.530937	-0.335109	-1.12683
ISL1	ABT737	-0.72332	0.000146238	Subgroup1	0.740574	1.13e-45	0.150012	0.0333265	-1.18491	1.4e-85	1910	-	Apoptosis regulation	BCL2, BCL-XL, BCL-W, BCL-B, BFL1	11228183	-0.671073	-1.09896	-1.04498	-0.477895	-1.69596	-0.858859	-0.572923	-0.38332	-0.979561	-1.07572	-0.602544	-0.267649	-1.21527	-0.912925	0.290603	-0.845189	0.0311112	0.28146	-0.530937	-0.335109	-1.12683
ISL1	PCI-34051	-0.703509	0.00109104	Subgroup1	0.740574	1.13e-45	0.150012	0.0333265	-1.18491	1.4e-85	1621	AK298746	Chromatin histone acetylation	HDAC8, HDAC6, HDAC1	24753719	-0.671073	-1.09896	-1.04498	-0.477895	-1.69596	-0.858859	-0.572923	-0.38332	-0.979561	-1.07572	-0.602544	-0.267649	-1.21527	-0.912925	0.290603	-0.845189	0.0311112	0.28146	-0.530937	-0.335109	-1.12683
JAZF1	BMS-345541	-0.752632	0.000304546	Subgroup1	0.644962	2.17e-114	-0.413556	2.29e-27	-0.548563	4.96e-55	1249	-	Other	IKK-1, IKK-2	9926054	-1.12405	-1.1882	-1.05674	-0.816171	-1.69252	-1.2948	-0.823678	-1.57516	-1.05013	-1.37255	-0.855259	-1.23783	-0.959033	-0.785523	-1.16211	-1.21926	-1.05591	-0.961472	-0.949021	-1.32914	-1.09644
REV3L	NVP-ADW742	-0.633399	0.00150431	Subgroup1	0.738616	1.88e-174	-0.512244	1.27e-45	-0.593902	6.15e-71	1932	NVP ADW742, NVPADW742	IGF1R signaling	IGF1R	9825149	-0.786545	-0.569607	-0.742811	-0.850908	-0.960447	-0.795889	-0.969942	-0.826632	-0.714235	-0.927882	-0.687372	-0.502237	-0.783529	-0.677478	-0.701998	-0.768153	-1.273	-0.597412	-1.07408	-0.598062	-0.709239
REV3L	Venetoclax	-0.533597	0.00968012	Subgroup1	0.738616	1.88e-174	-0.512244	1.27e-45	-0.593902	6.15e-71	1909	ABT-199, Veneclexta, GDC-0199	Apoptosis regulation	BCL2	49846579	-0.786545	-0.569607	-0.742811	-0.850908	-0.960447	-0.795889	-0.969942	-0.826632	-0.714235	-0.927882	-0.687372	-0.502237	-0.783529	-0.677478	-0.701998	-0.768153	-1.273	-0.597412	-1.07408	-0.598062	-0.709239
REV3L	Taselisib	-0.583992	0.00404989	Subgroup1	0.738616	1.88e-174	-0.512244	1.27e-45	-0.593902	6.15e-71	1561	GDC-0032, GDC0032, RG7604	PI3K/MTOR signaling	PI3K (beta sparing)	51001932	-0.786545	-0.569607	-0.742811	-0.850908	-0.960447	-0.795889	-0.969942	-0.826632	-0.714235	-0.927882	-0.687372	-0.502237	-0.783529	-0.677478	-0.701998	-0.768153	-1.273	-0.597412	-1.07408	-0.598062	-0.709239

## Sheet: Subgroup2 Potential Targets
Gene	Drug	Spearman.Correlation.Coefficent	P.value	Group	logFCsub1	adj.P.Valsub1	logFCsub2	adj.P.Valsub2	logFCsub3	adj.P.Valsub3	drug_id	synonyms	pathway_name	targets	pubchem	Mean_CERES	ACH.000078	ACH.000099	ACH.000120	ACH.000227	ACH.000259	ACH.000260	ACH.000310	ACH.000312	ACH.000341	ACH.000366	ACH.000804	ACH.001300	ACH.001301	ACH.001302	ACH.001303	ACH.001344	ACH.001354	ACH.001366	ACH.001548	ACH.001674
ACTL6A	MK-1775	-0.571146	0.0051179	Subgroup2	-0.213687	2.51e-23	0.594049	3.76e-121	-0.224195	2.52e-18	1179	AZD1775	Cell cycle	WEE1, PLK1	24856436	-1.20633	-0.935524	-0.4852	-1.63061	-0.980108	-1.05242	-1.49296	-1.19984	-0.895816	-0.708533	-1.28595	-1.32142	-1.22112	-1.32462	-1.25648	-1.03944	-1.98485	-0.719466	-1.49553	-1.44285	-1.65382
ACTL6A	MK-8776	-0.552372	0.00709734	Subgroup2	-0.213687	2.51e-23	0.594049	3.76e-121	-0.224195	2.52e-18	2046	SCH900776	Cell cycle	CHEK1, CHEK2, CDK2	16224745	-1.20633	-0.935524	-0.4852	-1.63061	-0.980108	-1.05242	-1.49296	-1.19984	-0.895816	-0.708533	-1.28595	-1.32142	-1.22112	-1.32462	-1.25648	-1.03944	-1.98485	-0.719466	-1.49553	-1.44285	-1.65382
ACTL6A	AZD7762	-0.618577	0.00205824	Subgroup2	-0.213687	2.51e-23	0.594049	3.76e-121	-0.224195	2.52e-18	1022	AZD-7762, AZD 7762	Cell cycle	CHEK1, CHEK2	11152667	-1.20633	-0.935524	-0.4852	-1.63061	-0.980108	-1.05242	-1.49296	-1.19984	-0.895816	-0.708533	-1.28595	-1.32142	-1.22112	-1.32462	-1.25648	-1.03944	-1.98485	-0.719466	-1.49553	-1.44285	-1.65382
ACTL6A	WZ4003	-0.607018	0.00690085	Subgroup2	-0.213687	2.51e-23	0.594049	3.76e-121	-0.224195	2.52e-18	1614	WZ 4003	Other, kinases	NUAK1, NUAK2	72200024	-1.20633	-0.935524	-0.4852	-1.63061	-0.980108	-1.05242	-1.49296	-1.19984	-0.895816	-0.708533	-1.28595	-1.32142	-1.22112	-1.32462	-1.25648	-1.03944	-1.98485	-0.719466	-1.49553	-1.44285	-1.65382
AHCY	AZD7762	-0.539526	0.00879148	Subgroup2	-0.386706	3.04e-41	0.729023	3.53e-96	-0.0983811	0.00610845	1022	AZD-7762, AZD 7762	Cell cycle	CHEK1, CHEK2	11152667	-0.895879	-0.850935	-1.15681	-0.470424	-1.1605	-1.18267	-0.596247	-0.596322	-0.948791	-0.68012	-0.999612	-1.06402	-0.859524	-0.886094	-0.888639	-0.317751	-1.36527	-0.850979	-0.866855	-0.986298	-1.18973
ANLN	AZD5991	-0.640351	0.00390643	Subgroup2	-0.46405	3.5e-19	1.59057	1.22e-156	-0.753784	3.58e-35	1720	SN1049446612, AZD5991	Apoptosis regulation	MCL1	-	-0.726988	-0.692856	-0.730182	-0.758891	-0.968166	-0.7455	-0.832596	-1.08754	-0.684892	-0.784506	-0.478022	-0.480577	-0.549888	-0.779682	-0.615765	-0.796724	-0.351854	-0.494802	-0.895004	-0.895655	-0.916667
ANLN	MK-1775	-0.664032	0.00074631	Subgroup2	-0.46405	3.5e-19	1.59057	1.22e-156	-0.753784	3.58e-35	1179	AZD1775	Cell cycle	WEE1, PLK1	24856436	-0.726988	-0.692856	-0.730182	-0.758891	-0.968166	-0.7455	-0.832596	-1.08754	-0.684892	-0.784506	-0.478022	-0.480577	-0.549888	-0.779682	-0.615765	-0.796724	-0.351854	-0.494802	-0.895004	-0.895655	-0.916667
ANLN	Docetaxel	-0.549407	0.00746178	Subgroup2	-0.46405	3.5e-19	1.59057	1.22e-156	-0.753784	3.58e-35	1007	RP-56976, Taxotere	Mitosis	Microtubule stabiliser	148124	-0.726988	-0.692856	-0.730182	-0.758891	-0.968166	-0.7455	-0.832596	-1.08754	-0.684892	-0.784506	-0.478022	-0.480577	-0.549888	-0.779682	-0.615765	-0.796724	-0.351854	-0.494802	-0.895004	-0.895655	-0.916667
ANLN	AMG-319	0.5583	0.00641299	Subgroup2	-0.46405	3.5e-19	1.59057	1.22e-156	-0.753784	3.58e-35	2045	AMG319	PI3K/MTOR signaling	PI3K (beta sparing)	68947304	-0.726988	-0.692856	-0.730182	-0.758891	-0.968166	-0.7455	-0.832596	-1.08754	-0.684892	-0.784506	-0.478022	-0.480577	-0.549888	-0.779682	-0.615765	-0.796724	-0.351854	-0.494802	-0.895004	-0.895655	-0.916667
ANLN	AZD7762	-0.597826	0.0031159	Subgroup2	-0.46405	3.5e-19	1.59057	1.22e-156	-0.753784	3.58e-35	1022	AZD-7762, AZD 7762	Cell cycle	CHEK1, CHEK2	11152667	-0.726988	-0.692856	-0.730182	-0.758891	-0.968166	-0.7455	-0.832596	-1.08754	-0.684892	-0.784506	-0.478022	-0.480577	-0.549888	-0.779682	-0.615765	-0.796724	-0.351854	-0.494802	-0.895004	-0.895655	-0.916667
ANLN	Entinostat	-0.584211	0.00986849	Subgroup2	-0.46405	3.5e-19	1.59057	1.22e-156	-0.753784	3.58e-35	1593	MS-275	Chromatin histone acetylation	HDAC1, HDAC3	4261	-0.726988	-0.692856	-0.730182	-0.758891	-0.968166	-0.7455	-0.832596	-1.08754	-0.684892	-0.784506	-0.478022	-0.480577	-0.549888	-0.779682	-0.615765	-0.796724	-0.351854	-0.494802	-0.895004	-0.895655	-0.916667
ANLN	Docetaxel	-0.549407	0.00746178	Subgroup2	-0.46405	3.5e-19	1.59057	1.22e-156	-0.753784	3.58e-35	1819	RP-56976, Taxotere	Mitosis	Microtubule stabiliser	-	-0.726988	-0.692856	-0.730182	-0.758891	-0.968166	-0.7455	-0.832596	-1.08754	-0.684892	-0.784506	-0.478022	-0.480577	-0.549888	-0.779682	-0.615765	-0.796724	-0.351854	-0.494802	-0.895004	-0.895655	-0.916667
AURKA	AMG-319	0.620553	0.0019757	Subgroup2	-0.77766	3.32e-62	1.72869	7.16e-234	-0.431123	7.95e-14	2045	AMG319	PI3K/MTOR signaling	PI3K (beta sparing)	68947304	-1.24717	-1.28686	-1.2017	-1.22311	-1.52849	-1.15378	-1.24041	-1.35282	-1.24707	-1.18744	-1.30903	-1.06095	-1.46707	-1.46132	-1.39733	-0.973528	-1.37499	-0.97536	-1.07811	-1.1241	-1.30002
AURKA	AZD7762	-0.568182	0.00539533	Subgroup2	-0.77766	3.32e-62	1.72869	7.16e-234	-0.431123	7.95e-14	1022	AZD-7762, AZD 7762	Cell cycle	CHEK1, CHEK2	11152667	-1.24717	-1.28686	-1.2017	-1.22311	-1.52849	-1.15378	-1.24041	-1.35282	-1.24707	-1.18744	-1.30903	-1.06095	-1.46707	-1.46132	-1.39733	-0.973528	-1.37499	-0.97536	-1.07811	-1.1241	-1.30002
AURKA	Alpelisib	0.568182	0.00539533	Subgroup2	-0.77766	3.32e-62	1.72869	7.16e-234	-0.431123	7.95e-14	1560	BYL719, BYL-719, NVP-BYL719	PI3K/MTOR signaling	PI3Kalpha	56649450	-1.24717	-1.28686	-1.2017	-1.22311	-1.52849	-1.15378	-1.24041	-1.35282	-1.24707	-1.18744	-1.30903	-1.06095	-1.46707	-1.46132	-1.39733	-0.973528	-1.37499	-0.97536	-1.07811	-1.1241	-1.30002
AURKA	Pevonedistat	-0.598814	0.00305681	Subgroup2	-0.77766	3.32e-62	1.72869	7.16e-234	-0.431123	7.95e-14	1529	MLN4924, MLN 4924, MLN-4924	Other	NAE	16720766	-1.24717	-1.28686	-1.2017	-1.22311	-1.52849	-1.15378	-1.24041	-1.35282	-1.24707	-1.18744	-1.30903	-1.06095	-1.46707	-1.46132	-1.39733	-0.973528	-1.37499	-0.97536	-1.07811	-1.1241	-1.30002
AURKA	Taselisib	0.562253	0.00598818	Subgroup2	-0.77766	3.32e-62	1.72869	7.16e-234	-0.431123	7.95e-14	1561	GDC-0032, GDC0032, RG7604	PI3K/MTOR signaling	PI3K (beta sparing)	51001932	-1.24717	-1.28686	-1.2017	-1.22311	-1.52849	-1.15378	-1.24041	-1.35282	-1.24707	-1.18744	-1.30903	-1.06095	-1.46707	-1.46132	-1.39733	-0.973528	-1.37499	-0.97536	-1.07811	-1.1241	-1.30002
AURKA	Selumetinib	0.696491	0.0012776	Subgroup2	-0.77766	3.32e-62	1.72869	7.16e-234	-0.431123	7.95e-14	1736	SN1103949345, AZD1480	ERK MAPK signaling	MEK1, MEK2	-	-1.24717	-1.28686	-1.2017	-1.22311	-1.52849	-1.15378	-1.24041	-1.35282	-1.24707	-1.18744	-1.30903	-1.06095	-1.46707	-1.46132	-1.39733	-0.973528	-1.37499	-0.97536	-1.07811	-1.1241	-1.30002
BANF1	Teniposide	0.685965	0.00160499	Subgroup2	-0.457795	2.79e-77	0.755767	5.74e-142	-0.0211842	0.517672	1809	Vumon	DNA replication	-	-	-1.28525	-1.3149	-1.32636	-1.05715	-1.48812	-1.11702	-1.1799	-1.33831	-1.14	-1.46901	-1.34788	-1.36997	-1.23291	-1.03621	-1.44677	-1.33182	-1.84091	-1.18935	-1.17282	-1.13014	-1.17544
BANF1	Topotecan	0.673684	0.00206967	Subgroup2	-0.457795	2.79e-77	0.755767	5.74e-142	-0.0211842	0.517672	1808	-	DNA replication	-	-	-1.28525	-1.3149	-1.32636	-1.05715	-1.48812	-1.11702	-1.1799	-1.33831	-1.14	-1.46901	-1.34788	-1.36997	-1.23291	-1.03621	-1.44677	-1.33182	-1.84091	-1.18935	-1.17282	-1.13014	-1.17544
BIRC5	Vorinostat	-0.563241	0.00588575	Subgroup2	-0.928371	6.76e-56	2.08288	2.57e-209	-0.531698	2.27e-13	1012	Zolinza, SAHA, suberanilohydroxamic acid, suberoylanilide hydroxamic acid, MK-0683	Chromatin histone acetylation	HDAC inhibitor Class I, IIa, IIb, IV	5311	-1.58461	-1.59214	-1.53591	-1.17056	-2.42909	-1.55054	-1.5008	-1.5612	-1.5317	-2.40548	-1.784	-1.43328	-1.40921	-1.45389	-1.66357	-1.5424	-1.00229	-2.03184	-1.32031	-1.19138	-1.58257
BIRC5	AZD7762	-0.600791	0.00294145	Subgroup2	-0.928371	6.76e-56	2.08288	2.57e-209	-0.531698	2.27e-13	1022	AZD-7762, AZD 7762	Cell cycle	CHEK1, CHEK2	11152667	-1.58461	-1.59214	-1.53591	-1.17056	-2.42909	-1.55054	-1.5008	-1.5612	-1.5317	-2.40548	-1.784	-1.43328	-1.40921	-1.45389	-1.66357	-1.5424	-1.00229	-2.03184	-1.32031	-1.19138	-1.58257
BIRC5	AZD6738	-0.704545	0.000257183	Subgroup2	-0.928371	6.76e-56	2.08288	2.57e-209	-0.531698	2.27e-13	1917	AZD 6738, AZD-6738	Genome integrity	ATR	54761306	-1.58461	-1.59214	-1.53591	-1.17056	-2.42909	-1.55054	-1.5008	-1.5612	-1.5317	-2.40548	-1.784	-1.43328	-1.40921	-1.45389	-1.66357	-1.5424	-1.00229	-2.03184	-1.32031	-1.19138	-1.58257
BIRC5	MK-1775	-0.681818	0.000478019	Subgroup2	-0.928371	6.76e-56	2.08288	2.57e-209	-0.531698	2.27e-13	1179	AZD1775	Cell cycle	WEE1, PLK1	24856436	-1.58461	-1.59214	-1.53591	-1.17056	-2.42909	-1.55054	-1.5008	-1.5612	-1.5317	-2.40548	-1.784	-1.43328	-1.40921	-1.45389	-1.66357	-1.5424	-1.00229	-2.03184	-1.32031	-1.19138	-1.58257
BUB1	AZD7762	-0.609684	0.00246666	Subgroup2	-0.504939	3.55e-24	1.5331	2.06e-156	-0.644681	1.02e-27	1022	AZD-7762, AZD 7762	Cell cycle	CHEK1, CHEK2	11152667	-0.783407	-0.555029	-0.63829	-0.927244	-0.800928	-1.03283	-0.817366	-0.885755	-0.81751	-1.27392	-0.624596	-0.657676	-0.667526	-0.936972	-0.761357	-0.776194	-0.878205	-0.410767	-0.705369	-0.720865	-0.779746
BUB1	MK-1775	-0.58498	0.00397617	Subgroup2	-0.504939	3.55e-24	1.5331	2.06e-156	-0.644681	1.02e-27	1179	AZD1775	Cell cycle	WEE1, PLK1	24856436	-0.783407	-0.555029	-0.63829	-0.927244	-0.800928	-1.03283	-0.817366	-0.885755	-0.81751	-1.27392	-0.624596	-0.657676	-0.667526	-0.936972	-0.761357	-0.776194	-0.878205	-0.410767	-0.705369	-0.720865	-0.779746
CBX1	AMG-319	0.684783	0.000442408	Subgroup2	-0.150183	3.71e-06	0.648382	1.59e-61	-0.362633	1.16e-21	2045	AMG319	PI3K/MTOR signaling	PI3K (beta sparing)	68947304	-0.634591	-0.717789	-0.634525	-0.461435	-0.932847	-0.560178	-0.382255	-0.916188	-0.807052	-0.665387	-0.464147	-0.57386	-0.450367	-0.632914	-0.411135	-0.281584	-0.741452	-0.824756	-0.623429	-0.881616	-0.728901
CBX1	GSK2578215A	0.533597	0.00968012	Subgroup2	-0.150183	3.71e-06	0.648382	1.59e-61	-0.362633	1.16e-21	1927	GSK 2578215A, GSK-2578215A	Other, kinases	LRRK2	68107965	-0.634591	-0.717789	-0.634525	-0.461435	-0.932847	-0.560178	-0.382255	-0.916188	-0.807052	-0.665387	-0.464147	-0.57386	-0.450367	-0.632914	-0.411135	-0.281584	-0.741452	-0.824756	-0.623429	-0.881616	-0.728901
CCNA2	MK-1775	-0.596838	0.00317596	Subgroup2	-0.641636	4.06e-40	1.69805	2.28e-211	-0.597068	1.27e-24	1179	AZD1775	Cell cycle	WEE1, PLK1	24856436	-1.31206	-1.08406	-1.18766	-1.32768	-1.40829	-1.18886	-1.12298	-1.32073	-1.05718	-1.45405	-1.0164	-0.855644	-1.41707	-1.31261	-1.22372	-1.72189	-1.89296	-1.73604	-1.20353	-1.53628	-1.17349
CCNA2	MK-8776	-0.572134	0.00502812	Subgroup2	-0.641636	4.06e-40	1.69805	2.28e-211	-0.597068	1.27e-24	2046	SCH900776	Cell cycle	CHEK1, CHEK2, CDK2	16224745	-1.31206	-1.08406	-1.18766	-1.32768	-1.40829	-1.18886	-1.12298	-1.32073	-1.05718	-1.45405	-1.0164	-0.855644	-1.41707	-1.31261	-1.22372	-1.72189	-1.89296	-1.73604	-1.20353	-1.53628	-1.17349
CCNA2	AZD6738	-0.548419	0.00758668	Subgroup2	-0.641636	4.06e-40	1.69805	2.28e-211	-0.597068	1.27e-24	1917	AZD 6738, AZD-6738	Genome integrity	ATR	54761306	-1.31206	-1.08406	-1.18766	-1.32768	-1.40829	-1.18886	-1.12298	-1.32073	-1.05718	-1.45405	-1.0164	-0.855644	-1.41707	-1.31261	-1.22372	-1.72189	-1.89296	-1.73604	-1.20353	-1.53628	-1.17349
CCNA2	AZD7762	-0.607708	0.00256615	Subgroup2	-0.641636	4.06e-40	1.69805	2.28e-211	-0.597068	1.27e-24	1022	AZD-7762, AZD 7762	Cell cycle	CHEK1, CHEK2	11152667	-1.31206	-1.08406	-1.18766	-1.32768	-1.40829	-1.18886	-1.12298	-1.32073	-1.05718	-1.45405	-1.0164	-0.855644	-1.41707	-1.31261	-1.22372	-1.72189	-1.89296	-1.73604	-1.20353	-1.53628	-1.17349
CCNB1	MK-1775	-0.590909	0.00355715	Subgroup2	-0.499365	4.45e-24	1.57136	5.78e-170	-0.686572	6.07e-32	1179	AZD1775	Cell cycle	WEE1, PLK1	24856436	-0.702761	-0.757834	-0.195129	-0.793299	-0.719877	-0.403127	-0.88335	-0.872175	-0.685958	-0.947546	-0.491333	-0.699476	-0.828566	-0.604076	-0.907371	-0.833063	-0.811801	-0.536335	-0.702642	-0.856303	-0.525954
CCND1	Erlotinib	-0.645257	0.00115722	Subgroup2	0.0430354	0.33407	0.669846	4.1e-37	-0.656081	2.18e-40	1168	Tarceva, RG-1415, CP-358774, OSI-774, Ro-508231, R-1415	EGFR signaling	EGFR	176870	-1.71819	-1.59073	-1.70206	-1.569	-2.02529	-1.65304	-1.63129	-1.58345	-1.3967	-2.6645	-1.78904	-1.90864	-2.07153	-1.23475	-1.79667	-2.05114	-0.821719	-2.02693	-1.68171	-1.25871	-1.90682
CDC20	WEHI-539	-0.543478	0.00823769	Subgroup2	-0.594645	8.18e-40	1.44313	1.52e-167	-0.437372	1.23e-15	1997	WEHI539, WEHI-539	Apoptosis regulation	BCL-XL	71297207	-1.62423	-1.4299	-1.52627	-1.75357	-2.28787	-1.6541	-1.61138	-1.93985	-1.58219	-1.54868	-1.62079	-1.47522	-1.71121	-1.54424	-1.80674	-1.20004	-1.6897	-1.55214	-1.51762	-1.42558	-1.60745
CDC6	Vorinostat	-0.562253	0.00598818	Subgroup2	-0.56952	1.11e-28	1.65995	1.46e-175	-0.665639	1.15e-27	1012	Zolinza, SAHA, suberanilohydroxamic acid, suberoylanilide hydroxamic acid, MK-0683	Chromatin histone acetylation	HDAC inhibitor Class I, IIa, IIb, IV	5311	-1.30699	-1.31088	-1.21433	-1.01023	-1.6984	-1.29889	-1.11524	-1.44077	-1.20846	-1.513	-1.11827	-1.42576	-1.23568	-1.10069	-1.15716	-1.31685	-1.58424	-1.48352	-1.23773	-1.38068	-1.28894
CDC7	Navitoclax	-0.612987	0.00379199	Subgroup2	-0.290817	5.48e-19	0.846671	3.96e-105	-0.339048	2.97e-18	1011	ABT-263, ABT263, ABT 263	Apoptosis regulation	BCL2, BCL-XL, BCL-W	24978538	-1.55381	-1.34388	-1.52451	-1.59195	-2.12079	-1.46162	-1.43496	-1.75218	-1.57679	-1.63111	-1.43565	-1.3817	-1.628	-1.3042	-1.83149	-1.65067	-1.5289	-1.14463	-1.64356	-1.69028	-1.3993
CDCA5	ERK_2440	0.642105	0.00378473	Subgroup2	-0.945408	6.45e-53	2.21392	1.31e-218	-0.623895	1.52e-16	1713	SN1051032892, ERK_2440	ERK MAPK signaling	ERK1,ERK2	-	-1.10507	-1.12704	-0.927743	-1.15589	-1.26496	-1.12405	-1.11388	-1.26316	-1.00737	-1.10531	-0.856137	-1.09335	-1.09516	-0.973321	-1.35808	-0.83951	-0.927474	-1.2997	-1.23144	-1.23745	-1.10033
CDCA5	BMS-536924	0.544466	0.00810389	Subgroup2	-0.945408	6.45e-53	2.21392	1.31e-218	-0.623895	1.52e-16	1091	BMS 536924	IGF1R signaling	IGF1R, IR	10390396	-1.10507	-1.12704	-0.927743	-1.15589	-1.26496	-1.12405	-1.11388	-1.26316	-1.00737	-1.10531	-0.856137	-1.09335	-1.09516	-0.973321	-1.35808	-0.83951	-0.927474	-1.2997	-1.23144	-1.23745	-1.10033
CDCA5	AZD7762	-0.543478	0.00823769	Subgroup2	-0.945408	6.45e-53	2.21392	1.31e-218	-0.623895	1.52e-16	1022	AZD-7762, AZD 7762	Cell cycle	CHEK1, CHEK2	11152667	-1.10507	-1.12704	-0.927743	-1.15589	-1.26496	-1.12405	-1.11388	-1.26316	-1.00737	-1.10531	-0.856137	-1.09335	-1.09516	-0.973321	-1.35808	-0.83951	-0.927474	-1.2997	-1.23144	-1.23745	-1.10033
CDCA8	MK-1775	-0.567194	0.00549057	Subgroup2	-0.678399	5.94e-35	1.78753	4.33e-175	-0.624341	4.03e-21	1179	AZD1775	Cell cycle	WEE1, PLK1	24856436	-1.92268	-1.72304	-2.07572	-2.06454	-2.5583	-1.65994	-1.77077	-2.49158	-1.8754	-1.94785	-1.8004	-2.03059	-1.30017	-1.86192	-2.08147	-2.28227	-1.67567	-1.82288	-1.69444	-1.83126	-1.90535
CDCA8	Obatoclax Mesylate	-0.666667	0.00238082	Subgroup2	-0.678399	5.94e-35	1.78753	4.33e-175	-0.624341	4.03e-21	1068	GX15-070MS, Obatoclax, GX15-070	Apoptosis regulation	BCL2, BCL-XL, BCL-W, MCL1	11404337	-1.92268	-1.72304	-2.07572	-2.06454	-2.5583	-1.65994	-1.77077	-2.49158	-1.8754	-1.94785	-1.8004	-2.03059	-1.30017	-1.86192	-2.08147	-2.28227	-1.67567	-1.82288	-1.69444	-1.83126	-1.90535
CDCA8	Wee1 Inhibitor	-0.681818	0.000478019	Subgroup2	-0.678399	5.94e-35	1.78753	4.33e-175	-0.624341	4.03e-21	1046	681640, Wee1 Inhibitor	Cell cycle	WEE1, CHEK1	10384072	-1.92268	-1.72304	-2.07572	-2.06454	-2.5583	-1.65994	-1.77077	-2.49158	-1.8754	-1.94785	-1.8004	-2.03059	-1.30017	-1.86192	-2.08147	-2.28227	-1.67567	-1.82288	-1.69444	-1.83126	-1.90535
CDCA8	AZD7762	-0.610672	0.00241815	Subgroup2	-0.678399	5.94e-35	1.78753	4.33e-175	-0.624341	4.03e-21	1022	AZD-7762, AZD 7762	Cell cycle	CHEK1, CHEK2	11152667	-1.92268	-1.72304	-2.07572	-2.06454	-2.5583	-1.65994	-1.77077	-2.49158	-1.8754	-1.94785	-1.8004	-2.03059	-1.30017	-1.86192	-2.08147	-2.28227	-1.67567	-1.82288	-1.69444	-1.83126	-1.90535
CDK2	AMG-319	0.570158	0.00520901	Subgroup2	-0.492005	1.29e-88	0.772907	1.91e-146	0.0121712	0.715481	2045	AMG319	PI3K/MTOR signaling	PI3K (beta sparing)	68947304	-0.644888	-0.580567	-0.479339	-0.68985	-0.133601	-0.798389	-0.877736	-0.210345	-0.453436	-0.851158	-0.620461	-0.844149	-0.644096	-0.312449	-0.983725	-0.429509	-0.972184	-0.808228	-0.434297	-0.935651	-0.838587
CDK2	AZD5991	-0.601754	0.00751056	Subgroup2	-0.492005	1.29e-88	0.772907	1.91e-146	0.0121712	0.715481	1720	SN1049446612, AZD5991	Apoptosis regulation	MCL1	-	-0.644888	-0.580567	-0.479339	-0.68985	-0.133601	-0.798389	-0.877736	-0.210345	-0.453436	-0.851158	-0.620461	-0.844149	-0.644096	-0.312449	-0.983725	-0.429509	-0.972184	-0.808228	-0.434297	-0.935651	-0.838587
CDT1	PCI-34051	-0.677193	0.00192701	Subgroup2	-0.536011	1.03e-31	1.42334	4.32e-158	-0.503063	5.65e-20	1621	AK298746	Chromatin histone acetylation	HDAC8, HDAC6, HDAC1	24753719	-1.45925	-1.04977	-1.33236	-1.53537	-2.11773	-1.51785	-1.56808	-1.97788	-1.30663	-1.28324	-1.23121	-1.63788	-1.50159	-1.40383	-1.61782	-1.53401	-1.59773	-1.2998	-1.35697	-1.25003	-1.06514
CDT1	Vorinostat	-0.54249	0.00837334	Subgroup2	-0.536011	1.03e-31	1.42334	4.32e-158	-0.503063	5.65e-20	1012	Zolinza, SAHA, suberanilohydroxamic acid, suberoylanilide hydroxamic acid, MK-0683	Chromatin histone acetylation	HDAC inhibitor Class I, IIa, IIb, IV	5311	-1.45925	-1.04977	-1.33236	-1.53537	-2.11773	-1.51785	-1.56808	-1.97788	-1.30663	-1.28324	-1.23121	-1.63788	-1.50159	-1.40383	-1.61782	-1.53401	-1.59773	-1.2998	-1.35697	-1.25003	-1.06514
CDT1	WEHI-539	-0.585968	0.00390359	Subgroup2	-0.536011	1.03e-31	1.42334	4.32e-158	-0.503063	5.65e-20	1997	WEHI539, WEHI-539	Apoptosis regulation	BCL-XL	71297207	-1.45925	-1.04977	-1.33236	-1.53537	-2.11773	-1.51785	-1.56808	-1.97788	-1.30663	-1.28324	-1.23121	-1.63788	-1.50159	-1.40383	-1.61782	-1.53401	-1.59773	-1.2998	-1.35697	-1.25003	-1.06514
CDT1	MK-1775	-0.642292	0.0012369	Subgroup2	-0.536011	1.03e-31	1.42334	4.32e-158	-0.503063	5.65e-20	1179	AZD1775	Cell cycle	WEE1, PLK1	24856436	-1.45925	-1.04977	-1.33236	-1.53537	-2.11773	-1.51785	-1.56808	-1.97788	-1.30663	-1.28324	-1.23121	-1.63788	-1.50159	-1.40383	-1.61782	-1.53401	-1.59773	-1.2998	-1.35697	-1.25003	-1.06514
CDT1	Pevonedistat	-0.605731	0.002669	Subgroup2	-0.536011	1.03e-31	1.42334	4.32e-158	-0.503063	5.65e-20	1529	MLN4924, MLN 4924, MLN-4924	Other	NAE	16720766	-1.45925	-1.04977	-1.33236	-1.53537	-2.11773	-1.51785	-1.56808	-1.97788	-1.30663	-1.28324	-1.23121	-1.63788	-1.50159	-1.40383	-1.61782	-1.53401	-1.59773	-1.2998	-1.35697	-1.25003	-1.06514
CDT1	AZD7762	-0.653162	0.000965591	Subgroup2	-0.536011	1.03e-31	1.42334	4.32e-158	-0.503063	5.65e-20	1022	AZD-7762, AZD 7762	Cell cycle	CHEK1, CHEK2	11152667	-1.45925	-1.04977	-1.33236	-1.53537	-2.11773	-1.51785	-1.56808	-1.97788	-1.30663	-1.28324	-1.23121	-1.63788	-1.50159	-1.40383	-1.61782	-1.53401	-1.59773	-1.2998	-1.35697	-1.25003	-1.06514
CENPA	Vorinostat	-0.54249	0.00837334	Subgroup2	-0.806008	3.71e-47	1.99173	1.67e-217	-0.624503	3.68e-20	1012	Zolinza, SAHA, suberanilohydroxamic acid, suberoylanilide hydroxamic acid, MK-0683	Chromatin histone acetylation	HDAC inhibitor Class I, IIa, IIb, IV	5311	-1.09906	-0.992284	-1.09662	-1.27857	-1.14789	-1.18826	-1.12063	-0.820251	-1.37883	-1.11088	-1.44201	-1.09568	-0.995869	-1.12327	-1.03201	-0.935808	-1.16973	-0.89798	-1.05943	-1.0132	-1.08205
CENPA	MK-1775	-0.616601	0.00214367	Subgroup2	-0.806008	3.71e-47	1.99173	1.67e-217	-0.624503	3.68e-20	1179	AZD1775	Cell cycle	WEE1, PLK1	24856436	-1.09906	-0.992284	-1.09662	-1.27857	-1.14789	-1.18826	-1.12063	-0.820251	-1.37883	-1.11088	-1.44201	-1.09568	-0.995869	-1.12327	-1.03201	-0.935808	-1.16973	-0.89798	-1.05943	-1.0132	-1.08205
CENPA	AZD7762	-0.579051	0.00443597	Subgroup2	-0.806008	3.71e-47	1.99173	1.67e-217	-0.624503	3.68e-20	1022	AZD-7762, AZD 7762	Cell cycle	CHEK1, CHEK2	11152667	-1.09906	-0.992284	-1.09662	-1.27857	-1.14789	-1.18826	-1.12063	-0.820251	-1.37883	-1.11088	-1.44201	-1.09568	-0.995869	-1.12327	-1.03201	-0.935808	-1.16973	-0.89798	-1.05943	-1.0132	-1.08205
CENPH	Navitoclax	-0.653247	0.00171945	Subgroup2	-0.346427	1.08e-13	1.30812	6.44e-128	-0.669943	1.02e-34	1011	ABT-263, ABT263, ABT 263	Apoptosis regulation	BCL2, BCL-XL, BCL-W	24978538	-0.862539	-0.943847	-0.88369	-1.07184	-0.667331	-0.815819	-0.824042	-1.25256	-0.793633	-1.11923	-0.733683	-0.830822	-0.831073	-0.796969	-0.755946	-0.951164	-0.380628	-0.968094	-0.814004	-0.990143	-0.826256
CENPH	MK-1775	-0.605731	0.002669	Subgroup2	-0.346427	1.08e-13	1.30812	6.44e-128	-0.669943	1.02e-34	1179	AZD1775	Cell cycle	WEE1, PLK1	24856436	-0.862539	-0.943847	-0.88369	-1.07184	-0.667331	-0.815819	-0.824042	-1.25256	-0.793633	-1.11923	-0.733683	-0.830822	-0.831073	-0.796969	-0.755946	-0.951164	-0.380628	-0.968094	-0.814004	-0.990143	-0.826256
CENPH	WEHI-539	-0.602767	0.00282979	Subgroup2	-0.346427	1.08e-13	1.30812	6.44e-128	-0.669943	1.02e-34	1997	WEHI539, WEHI-539	Apoptosis regulation	BCL-XL	71297207	-0.862539	-0.943847	-0.88369	-1.07184	-0.667331	-0.815819	-0.824042	-1.25256	-0.793633	-1.11923	-0.733683	-0.830822	-0.831073	-0.796969	-0.755946	-0.951164	-0.380628	-0.968094	-0.814004	-0.990143	-0.826256
CENPH	ABT737	-0.603755	0.00277531	Subgroup2	-0.346427	1.08e-13	1.30812	6.44e-128	-0.669943	1.02e-34	1910	-	Apoptosis regulation	BCL2, BCL-XL, BCL-W, BCL-B, BFL1	11228183	-0.862539	-0.943847	-0.88369	-1.07184	-0.667331	-0.815819	-0.824042	-1.25256	-0.793633	-1.11923	-0.733683	-0.830822	-0.831073	-0.796969	-0.755946	-0.951164	-0.380628	-0.968094	-0.814004	-0.990143	-0.826256
CENPH	Ibrutinib	-0.594737	0.00839121	Subgroup2	-0.346427	1.08e-13	1.30812	6.44e-128	-0.669943	1.02e-34	1799	PCI-32765, CRA-032765, PCI-32765-00	Other, kinases	BTK	24821094	-0.862539	-0.943847	-0.88369	-1.07184	-0.667331	-0.815819	-0.824042	-1.25256	-0.793633	-1.11923	-0.733683	-0.830822	-0.831073	-0.796969	-0.755946	-0.951164	-0.380628	-0.968094	-0.814004	-0.990143	-0.826256
CENPH	PCI-34051	-0.703509	0.00109104	Subgroup2	-0.346427	1.08e-13	1.30812	6.44e-128	-0.669943	1.02e-34	1621	AK298746	Chromatin histone acetylation	HDAC8, HDAC6, HDAC1	24753719	-0.862539	-0.943847	-0.88369	-1.07184	-0.667331	-0.815819	-0.824042	-1.25256	-0.793633	-1.11923	-0.733683	-0.830822	-0.831073	-0.796969	-0.755946	-0.951164	-0.380628	-0.968094	-0.814004	-0.990143	-0.826256
CENPH	AZD7762	-0.686759	0.000419928	Subgroup2	-0.346427	1.08e-13	1.30812	6.44e-128	-0.669943	1.02e-34	1022	AZD-7762, AZD 7762	Cell cycle	CHEK1, CHEK2	11152667	-0.862539	-0.943847	-0.88369	-1.07184	-0.667331	-0.815819	-0.824042	-1.25256	-0.793633	-1.11923	-0.733683	-0.830822	-0.831073	-0.796969	-0.755946	-0.951164	-0.380628	-0.968094	-0.814004	-0.990143	-0.826256
CENPI	Entinostat	-0.77193	0.000163189	Subgroup2	-0.365149	5.03e-45	0.945641	4.6e-232	-0.321398	1.14e-24	1593	MS-275	Chromatin histone acetylation	HDAC1, HDAC3	4261	-0.82299	-1.06438	-0.797345	-0.664899	-1.21857	-0.6628	-1.04306	-1.10314	-0.991079	-1.32194	-0.570549	-0.642495	-0.812387	-0.85211	-0.735776	-0.780673	-0.198486	-0.818753	-0.971017	-0.449024	-0.761325
CENPI	ABT737	-0.565217	0.00568528	Subgroup2	-0.365149	5.03e-45	0.945641	4.6e-232	-0.321398	1.14e-24	1910	-	Apoptosis regulation	BCL2, BCL-XL, BCL-W, BCL-B, BFL1	11228183	-0.82299	-1.06438	-0.797345	-0.664899	-1.21857	-0.6628	-1.04306	-1.10314	-0.991079	-1.32194	-0.570549	-0.642495	-0.812387	-0.85211	-0.735776	-0.780673	-0.198486	-0.818753	-0.971017	-0.449024	-0.761325
CENPI	Navitoclax	-0.623377	0.00312255	Subgroup2	-0.365149	5.03e-45	0.945641	4.6e-232	-0.321398	1.14e-24	1011	ABT-263, ABT263, ABT 263	Apoptosis regulation	BCL2, BCL-XL, BCL-W	24978538	-0.82299	-1.06438	-0.797345	-0.664899	-1.21857	-0.6628	-1.04306	-1.10314	-0.991079	-1.32194	-0.570549	-0.642495	-0.812387	-0.85211	-0.735776	-0.780673	-0.198486	-0.818753	-0.971017	-0.449024	-0.761325
CENPI	Sorafenib	-0.583004	0.00412476	Subgroup2	-0.365149	5.03e-45	0.945641	4.6e-232	-0.321398	1.14e-24	1085	Nexavar, 284461-73-0, BAY 43-9006	Other, kinases	PDGFR, KIT, VEGFR, RAF	216239	-0.82299	-1.06438	-0.797345	-0.664899	-1.21857	-0.6628	-1.04306	-1.10314	-0.991079	-1.32194	-0.570549	-0.642495	-0.812387	-0.85211	-0.735776	-0.780673	-0.198486	-0.818753	-0.971017	-0.449024	-0.761325
CENPI	WEHI-539	-0.657115	0.000880303	Subgroup2	-0.365149	5.03e-45	0.945641	4.6e-232	-0.321398	1.14e-24	1997	WEHI539, WEHI-539	Apoptosis regulation	BCL-XL	71297207	-0.82299	-1.06438	-0.797345	-0.664899	-1.21857	-0.6628	-1.04306	-1.10314	-0.991079	-1.32194	-0.570549	-0.642495	-0.812387	-0.85211	-0.735776	-0.780673	-0.198486	-0.818753	-0.971017	-0.449024	-0.761325
CENPN	AZD7762	-0.592885	0.00342603	Subgroup2	-0.667108	2.01e-44	1.48511	1.16e-154	-0.371763	2.03e-10	1022	AZD-7762, AZD 7762	Cell cycle	CHEK1, CHEK2	11152667	-1.33965	-1.44593	-1.3682	-1.29121	-1.71006	-1.08579	-1.2925	-2.01073	-1.14469	-1.53166	-1.3422	-1.49208	-1.31212	-1.31624	-1.3844	-1.34838	-1.35885	-1.55962	-0.916621	-0.66421	-1.21753
CENPN	Fulvestrant	-0.646245	0.00113164	Subgroup2	-0.667108	2.01e-44	1.48511	1.16e-154	-0.371763	2.03e-10	1200	Faslodex, ICI-182780	Hormone-related	ESR	104741	-1.33965	-1.44593	-1.3682	-1.29121	-1.71006	-1.08579	-1.2925	-2.01073	-1.14469	-1.53166	-1.3422	-1.49208	-1.31212	-1.31624	-1.3844	-1.34838	-1.35885	-1.55962	-0.916621	-0.66421	-1.21753
CENPN	Ibrutinib	-0.635088	0.00429089	Subgroup2	-0.667108	2.01e-44	1.48511	1.16e-154	-0.371763	2.03e-10	1799	PCI-32765, CRA-032765, PCI-32765-00	Other, kinases	BTK	24821094	-1.33965	-1.44593	-1.3682	-1.29121	-1.71006	-1.08579	-1.2925	-2.01073	-1.14469	-1.53166	-1.3422	-1.49208	-1.31212	-1.31624	-1.3844	-1.34838	-1.35885	-1.55962	-0.916621	-0.66421	-1.21753
CENPN	Fulvestrant	-0.646245	0.00113164	Subgroup2	-0.667108	2.01e-44	1.48511	1.16e-154	-0.371763	2.03e-10	1816	-	Hormone-related	-	-	-1.33965	-1.44593	-1.3682	-1.29121	-1.71006	-1.08579	-1.2925	-2.01073	-1.14469	-1.53166	-1.3422	-1.49208	-1.31212	-1.31624	-1.3844	-1.34838	-1.35885	-1.55962	-0.916621	-0.66421	-1.21753
CEP55	MK-1775	-0.532609	0.00983525	Subgroup2	-0.748724	3.15e-41	1.83874	2.9e-180	-0.569957	3.24e-17	1179	AZD1775	Cell cycle	WEE1, PLK1	24856436	-0.626062	-0.456245	-0.454013	-0.790569	-0.695035	-0.676057	-0.5924	-0.577819	-0.728157	-0.804505	-0.796281	-0.562361	-0.544779	-0.587891	-0.633312	-0.496986	-0.418234	-0.91518	-0.494641	-0.502043	-0.794733
CEP55	Entinostat	-0.622807	0.00530932	Subgroup2	-0.748724	3.15e-41	1.83874	2.9e-180	-0.569957	3.24e-17	1593	MS-275	Chromatin histone acetylation	HDAC1, HDAC3	4261	-0.626062	-0.456245	-0.454013	-0.790569	-0.695035	-0.676057	-0.5924	-0.577819	-0.728157	-0.804505	-0.796281	-0.562361	-0.544779	-0.587891	-0.633312	-0.496986	-0.418234	-0.91518	-0.494641	-0.502043	-0.794733
CHAF1A	AZD7762	-0.592885	0.00342603	Subgroup2	-0.564974	4.64e-50	1.32878	5.19e-206	-0.377944	3.83e-16	1022	AZD-7762, AZD 7762	Cell cycle	CHEK1, CHEK2	11152667	-1.26943	-1.3491	-1.34252	-1.31324	-1.2902	-1.23246	-1.33644	-1.28367	-1.2145	-1.73275	-1.37826	-1.31769	-1.16068	-1.17269	-0.92076	-1.34356	-0.7236	-1.412	-1.23936	-1.38385	-1.24116
CHAF1A	MK-1775	-0.566206	0.00558721	Subgroup2	-0.564974	4.64e-50	1.32878	5.19e-206	-0.377944	3.83e-16	1179	AZD1775	Cell cycle	WEE1, PLK1	24856436	-1.26943	-1.3491	-1.34252	-1.31324	-1.2902	-1.23246	-1.33644	-1.28367	-1.2145	-1.73275	-1.37826	-1.31769	-1.16068	-1.17269	-0.92076	-1.34356	-0.7236	-1.412	-1.23936	-1.38385	-1.24116
CHAF1A	AZD6738	-0.599802	0.00299866	Subgroup2	-0.564974	4.64e-50	1.32878	5.19e-206	-0.377944	3.83e-16	1917	AZD 6738, AZD-6738	Genome integrity	ATR	54761306	-1.26943	-1.3491	-1.34252	-1.31324	-1.2902	-1.23246	-1.33644	-1.28367	-1.2145	-1.73275	-1.37826	-1.31769	-1.16068	-1.17269	-0.92076	-1.34356	-0.7236	-1.412	-1.23936	-1.38385	-1.24116
CHAF1B	Pevonedistat	-0.547431	0.00771332	Subgroup2	-0.275041	1.25e-14	0.989003	4.28e-124	-0.487871	2.13e-31	1529	MLN4924, MLN 4924, MLN-4924	Other	NAE	16720766	-1.99226	-1.89771	-2.08187	-1.96956	-1.98246	-2.06213	-1.81182	-2.26037	-1.65257	-2.29067	-1.86616	-2.21933	-1.98977	-1.93336	-2.02536	-1.83873	-1.75933	-2.02596	-2.18887	-1.92951	-2.05971
CHAF1B	Trametinib	0.610672	0.00241815	Subgroup2	-0.275041	1.25e-14	0.989003	4.28e-124	-0.487871	2.13e-31	1372	GSK1120212, Mekinist	ERK MAPK signaling	MEK1, MEK2	11707110	-1.99226	-1.89771	-2.08187	-1.96956	-1.98246	-2.06213	-1.81182	-2.26037	-1.65257	-2.29067	-1.86616	-2.21933	-1.98977	-1.93336	-2.02536	-1.83873	-1.75933	-2.02596	-2.18887	-1.92951	-2.05971
CHAF1B	Sepantronium bromide	-0.58004	0.00435638	Subgroup2	-0.275041	1.25e-14	0.989003	4.28e-124	-0.487871	2.13e-31	1941	YM155, YM-155, YM 155	Apoptosis regulation	BIRC5	11178236	-1.99226	-1.89771	-2.08187	-1.96956	-1.98246	-2.06213	-1.81182	-2.26037	-1.65257	-2.29067	-1.86616	-2.21933	-1.98977	-1.93336	-2.02536	-1.83873	-1.75933	-2.02596	-2.18887	-1.92951	-2.05971
CHAF1B	ERK_6604	0.649123	0.00332846	Subgroup2	-0.275041	1.25e-14	0.989003	4.28e-124	-0.487871	2.13e-31	1714	SN1047587618, ERK_6604	ERK MAPK signaling	ERK1,ERK2	-	-1.99226	-1.89771	-2.08187	-1.96956	-1.98246	-2.06213	-1.81182	-2.26037	-1.65257	-2.29067	-1.86616	-2.21933	-1.98977	-1.93336	-2.02536	-1.83873	-1.75933	-2.02596	-2.18887	-1.92951	-2.05971
CHAF1B	ERK_2440	0.605263	0.00709942	Subgroup2	-0.275041	1.25e-14	0.989003	4.28e-124	-0.487871	2.13e-31	1713	SN1051032892, ERK_2440	ERK MAPK signaling	ERK1,ERK2	-	-1.99226	-1.89771	-2.08187	-1.96956	-1.98246	-2.06213	-1.81182	-2.26037	-1.65257	-2.29067	-1.86616	-2.21933	-1.98977	-1.93336	-2.02536	-1.83873	-1.75933	-2.02596	-2.18887	-1.92951	-2.05971
CHAF1B	SCH772984	0.576087	0.00468214	Subgroup2	-0.275041	1.25e-14	0.989003	4.28e-124	-0.487871	2.13e-31	1564	CS-1421	ERK MAPK signaling	ERK1, ERK2	24866313	-1.99226	-1.89771	-2.08187	-1.96956	-1.98246	-2.06213	-1.81182	-2.26037	-1.65257	-2.29067	-1.86616	-2.21933	-1.98977	-1.93336	-2.02536	-1.83873	-1.75933	-2.02596	-2.18887	-1.92951	-2.05971
CIT	PRIMA-1MET	-0.605263	0.00709942	Subgroup2	-0.412328	4.54e-30	0.826387	1.2e-77	-0.148476	0.000864411	1131	Prima 1MET, APR-246	p53 pathway	TP53 activation	52918385	-0.612188	-0.591773	-0.565918	-0.750122	-1.08224	-0.690298	-0.327001	-0.75973	-0.863647	-0.890864	-0.706036	-0.79352	-0.508545	-0.821521	-0.275135	-0.540166	-0.0899658	-0.176205	-0.521774	-0.37619	-0.913108
CIT	ABT737	-0.578063	0.00451679	Subgroup2	-0.412328	4.54e-30	0.826387	1.2e-77	-0.148476	0.000864411	1910	-	Apoptosis regulation	BCL2, BCL-XL, BCL-W, BCL-B, BFL1	11228183	-0.612188	-0.591773	-0.565918	-0.750122	-1.08224	-0.690298	-0.327001	-0.75973	-0.863647	-0.890864	-0.706036	-0.79352	-0.508545	-0.821521	-0.275135	-0.540166	-0.0899658	-0.176205	-0.521774	-0.37619	-0.913108
CIT	Navitoclax	-0.677922	0.000999153	Subgroup2	-0.412328	4.54e-30	0.826387	1.2e-77	-0.148476	0.000864411	1011	ABT-263, ABT263, ABT 263	Apoptosis regulation	BCL2, BCL-XL, BCL-W	24978538	-0.612188	-0.591773	-0.565918	-0.750122	-1.08224	-0.690298	-0.327001	-0.75973	-0.863647	-0.890864	-0.706036	-0.79352	-0.508545	-0.821521	-0.275135	-0.540166	-0.0899658	-0.176205	-0.521774	-0.37619	-0.913108
CIT	WEHI-539	-0.675889	0.000556503	Subgroup2	-0.412328	4.54e-30	0.826387	1.2e-77	-0.148476	0.000864411	1997	WEHI539, WEHI-539	Apoptosis regulation	BCL-XL	71297207	-0.612188	-0.591773	-0.565918	-0.750122	-1.08224	-0.690298	-0.327001	-0.75973	-0.863647	-0.890864	-0.706036	-0.79352	-0.508545	-0.821521	-0.275135	-0.540166	-0.0899658	-0.176205	-0.521774	-0.37619	-0.913108
CLSPN	Acetalax	0.591228	0.00886209	Subgroup2	-0.492142	4.5e-38	1.19697	1.8e-159	-0.364294	3.47e-15	1804	Oxyphenisatin acetate	Unclassified	-	-	-0.87769	-0.952682	-1.13544	-1.13268	-1.12512	-0.869179	-0.626981	-1.38684	-1.05581	-0.386024	-0.753408	-0.219064	-1.06372	-1.06149	-0.455403	-1.6442	-0.798737	-0.597047	-0.920203	-0.977658	-0.392121
CNIH4	Dabrafenib	0.603755	0.00277531	Subgroup2	-0.54319	5.45e-125	0.725799	7.49e-143	0.1267	2.12e-05	1373	GSK2118436, Tafinlar	ERK MAPK signaling	BRAF	44462760	-1.33267	-1.34491	-1.53302	-0.87881	-2.04024	-1.27861	-1.29621	-1.5186	-1.16218	-1.62819	-1.26007	-1.32909	-1.69662	-1.25976	-1.11136	-1.46187	-0.828754	-1.396	-1.4211	-1.01193	-1.19607
CPSF3	Telomerase Inhibitor IX	-0.559289	0.00630449	Subgroup2	-0.213012	6.58e-14	0.75573	8.15e-113	-0.368759	2.41e-28	1930	MST-312, MST 312, MST312	Genome integrity	Telomerase	10385095	-1.19878	-1.35806	-1.16918	-1.17224	-1.42876	-0.6739	-1.1785	-1.1017	-0.967047	-1.06991	-1.09731	-1.71567	-1.22561	-1.27391	-1.18161	-1.06476	-1.07638	-1.53329	-0.885054	-1.4707	-1.33194
CPSF3	Podophyllotoxin bromide	-0.591228	0.00886209	Subgroup2	-0.213012	6.58e-14	0.75573	8.15e-113	-0.368759	2.41e-28	1825	-	Unclassified	-	-	-1.19878	-1.35806	-1.16918	-1.17224	-1.42876	-0.6739	-1.1785	-1.1017	-0.967047	-1.06991	-1.09731	-1.71567	-1.22561	-1.27391	-1.18161	-1.06476	-1.07638	-1.53329	-0.885054	-1.4707	-1.33194
CPSF3	Mirin	-0.614035	0.00615134	Subgroup2	-0.213012	6.58e-14	0.75573	8.15e-113	-0.368759	2.41e-28	1048	-	Genome integrity	MRE11	none	-1.19878	-1.35806	-1.16918	-1.17224	-1.42876	-0.6739	-1.1785	-1.1017	-0.967047	-1.06991	-1.09731	-1.71567	-1.22561	-1.27391	-1.18161	-1.06476	-1.07638	-1.53329	-0.885054	-1.4707	-1.33194
CPSF3	Fulvestrant	-0.642292	0.0012369	Subgroup2	-0.213012	6.58e-14	0.75573	8.15e-113	-0.368759	2.41e-28	1200	Faslodex, ICI-182780	Hormone-related	ESR	104741	-1.19878	-1.35806	-1.16918	-1.17224	-1.42876	-0.6739	-1.1785	-1.1017	-0.967047	-1.06991	-1.09731	-1.71567	-1.22561	-1.27391	-1.18161	-1.06476	-1.07638	-1.53329	-0.885054	-1.4707	-1.33194
CPSF3	Fulvestrant	-0.642292	0.0012369	Subgroup2	-0.213012	6.58e-14	0.75573	8.15e-113	-0.368759	2.41e-28	1816	-	Hormone-related	-	-	-1.19878	-1.35806	-1.16918	-1.17224	-1.42876	-0.6739	-1.1785	-1.1017	-0.967047	-1.06991	-1.09731	-1.71567	-1.22561	-1.27391	-1.18161	-1.06476	-1.07638	-1.53329	-0.885054	-1.4707	-1.33194
CPSF3	Vincristine	-0.584211	0.00986849	Subgroup2	-0.213012	6.58e-14	0.75573	8.15e-113	-0.368759	2.41e-28	1818	-	Mitosis	-	-	-1.19878	-1.35806	-1.16918	-1.17224	-1.42876	-0.6739	-1.1785	-1.1017	-0.967047	-1.06991	-1.09731	-1.71567	-1.22561	-1.27391	-1.18161	-1.06476	-1.07638	-1.53329	-0.885054	-1.4707	-1.33194
CPSF3	Topotecan	-0.589474	0.00910547	Subgroup2	-0.213012	6.58e-14	0.75573	8.15e-113	-0.368759	2.41e-28	1808	-	DNA replication	-	-	-1.19878	-1.35806	-1.16918	-1.17224	-1.42876	-0.6739	-1.1785	-1.1017	-0.967047	-1.06991	-1.09731	-1.71567	-1.22561	-1.27391	-1.18161	-1.06476	-1.07638	-1.53329	-0.885054	-1.4707	-1.33194
CPSF3	PCI-34051	-0.64386	0.00366614	Subgroup2	-0.213012	6.58e-14	0.75573	8.15e-113	-0.368759	2.41e-28	1621	AK298746	Chromatin histone acetylation	HDAC8, HDAC6, HDAC1	24753719	-1.19878	-1.35806	-1.16918	-1.17224	-1.42876	-0.6739	-1.1785	-1.1017	-0.967047	-1.06991	-1.09731	-1.71567	-1.22561	-1.27391	-1.18161	-1.06476	-1.07638	-1.53329	-0.885054	-1.4707	-1.33194
DBF4	AZD7762	-0.552372	0.00709734	Subgroup2	-0.283831	3.05e-16	1.03032	3.11e-145	-0.512091	2.31e-36	1022	AZD-7762, AZD 7762	Cell cycle	CHEK1, CHEK2	11152667	-0.645933	-0.378365	-0.650962	-0.585993	-1.0632	-0.17612	-0.336355	-0.570995	-0.562496	-0.318307	-0.621531	-0.77819	-0.870731	-0.772167	-0.374018	-0.698473	-1.51986	-1.12003	-0.84956	-0.471671	-0.199626
DONSON	PD173074	0.73419	0.000102708	Subgroup2	-0.183095	8.18e-12	0.64353	4.59e-90	-0.311587	5.2e-23	1049	PD-173074, PD 173074	RTK signaling	FGFR1, FGFR2, FGFR3	1401	-1.9477	-2.11953	-1.63482	-1.77136	-2.34038	-2.04818	-2.00483	-2.24546	-1.86427	-2.1041	-1.79113	-1.78224	-1.80675	-1.64854	-1.8446	-1.94432	-2.50048	-1.70318	-2.22219	-1.71674	-1.86095
DONSON	BMS-536924	0.544466	0.00810389	Subgroup2	-0.183095	8.18e-12	0.64353	4.59e-90	-0.311587	5.2e-23	1091	BMS 536924	IGF1R signaling	IGF1R, IR	10390396	-1.9477	-2.11953	-1.63482	-1.77136	-2.34038	-2.04818	-2.00483	-2.24546	-1.86427	-2.1041	-1.79113	-1.78224	-1.80675	-1.64854	-1.8446	-1.94432	-2.50048	-1.70318	-2.22219	-1.71674	-1.86095
DONSON	MIRA-1	0.637352	0.00137999	Subgroup2	-0.183095	8.18e-12	0.64353	4.59e-90	-0.311587	5.2e-23	1931	MIRA 1, MIRA1, NSC19630, NSC-19630, NSC 19630	p53 pathway	TP53	227681	-1.9477	-2.11953	-1.63482	-1.77136	-2.34038	-2.04818	-2.00483	-2.24546	-1.86427	-2.1041	-1.79113	-1.78224	-1.80675	-1.64854	-1.8446	-1.94432	-2.50048	-1.70318	-2.22219	-1.71674	-1.86095
DONSON	NVP-ADW742	0.636364	0.00141023	Subgroup2	-0.183095	8.18e-12	0.64353	4.59e-90	-0.311587	5.2e-23	1932	NVP ADW742, NVPADW742	IGF1R signaling	IGF1R	9825149	-1.9477	-2.11953	-1.63482	-1.77136	-2.34038	-2.04818	-2.00483	-2.24546	-1.86427	-2.1041	-1.79113	-1.78224	-1.80675	-1.64854	-1.8446	-1.94432	-2.50048	-1.70318	-2.22219	-1.71674	-1.86095
DSN1	WEHI-539	-0.548419	0.00758668	Subgroup2	-0.373721	2.35e-29	0.975388	7.6e-138	-0.335646	4.52e-17	1997	WEHI539, WEHI-539	Apoptosis regulation	BCL-XL	71297207	-0.986059	-0.917037	-0.959197	-0.948408	-1.20326	-0.805419	-0.903416	-1.32642	-1.09993	-1.21059	-0.725516	-0.869377	-1.00621	-1.26556	-0.993646	-0.97377	-0.979976	-0.904995	-0.653287	-0.814892	-1.16027
DTL	AZD6738	-0.563241	0.00588575	Subgroup2	-0.589661	1.19e-19	1.95863	1.24e-149	-0.902326	5.11e-32	1917	AZD 6738, AZD-6738	Genome integrity	ATR	54761306	-1.50042	-1.37193	-1.58873	-1.41311	-1.58469	-1.6104	-1.23825	-1.7181	-1.37038	-1.81379	-1.52733	-1.46625	-1.33439	-1.49791	-1.79389	-1.40494	-2.01342	-1.25593	-1.45379	-1.1538	-1.39727
DTL	Vorinostat	-0.672925	0.000599638	Subgroup2	-0.589661	1.19e-19	1.95863	1.24e-149	-0.902326	5.11e-32	1012	Zolinza, SAHA, suberanilohydroxamic acid, suberoylanilide hydroxamic acid, MK-0683	Chromatin histone acetylation	HDAC inhibitor Class I, IIa, IIb, IV	5311	-1.50042	-1.37193	-1.58873	-1.41311	-1.58469	-1.6104	-1.23825	-1.7181	-1.37038	-1.81379	-1.52733	-1.46625	-1.33439	-1.49791	-1.79389	-1.40494	-2.01342	-1.25593	-1.45379	-1.1538	-1.39727
DTL	MK-1775	-0.694664	0.000339333	Subgroup2	-0.589661	1.19e-19	1.95863	1.24e-149	-0.902326	5.11e-32	1179	AZD1775	Cell cycle	WEE1, PLK1	24856436	-1.50042	-1.37193	-1.58873	-1.41311	-1.58469	-1.6104	-1.23825	-1.7181	-1.37038	-1.81379	-1.52733	-1.46625	-1.33439	-1.49791	-1.79389	-1.40494	-2.01342	-1.25593	-1.45379	-1.1538	-1.39727
DTL	Vinorelbine	-0.557143	0.00977181	Subgroup2	-0.589661	1.19e-19	1.95863	1.24e-149	-0.902326	5.11e-32	2048	vinorelbine tartrate, Navelbine, Exelbine	Mitosis	Microtubule destabiliser	5311497	-1.50042	-1.37193	-1.58873	-1.41311	-1.58469	-1.6104	-1.23825	-1.7181	-1.37038	-1.81379	-1.52733	-1.46625	-1.33439	-1.49791	-1.79389	-1.40494	-2.01342	-1.25593	-1.45379	-1.1538	-1.39727
DTL	AZD7762	-0.607708	0.00256615	Subgroup2	-0.589661	1.19e-19	1.95863	1.24e-149	-0.902326	5.11e-32	1022	AZD-7762, AZD 7762	Cell cycle	CHEK1, CHEK2	11152667	-1.50042	-1.37193	-1.58873	-1.41311	-1.58469	-1.6104	-1.23825	-1.7181	-1.37038	-1.81379	-1.52733	-1.46625	-1.33439	-1.49791	-1.79389	-1.40494	-2.01342	-1.25593	-1.45379	-1.1538	-1.39727
E2F6	PCI-34051	-0.659649	0.00272906	Subgroup2	-0.134459	7.71e-08	0.630799	1.16e-101	-0.369345	3.25e-37	1621	AK298746	Chromatin histone acetylation	HDAC8, HDAC6, HDAC1	24753719	-0.631279	-0.756656	-0.520921	-0.759326	-0.73653	-0.984512	-0.534114	-0.551523	-0.653131	-0.392811	-0.63988	-0.413734	-0.728953	-0.480921	-0.797424	-0.752089	-0.159207	-0.60639	-0.859922	-0.622103	-0.675438
E2F6	Telomerase Inhibitor IX	-0.676877	0.000542718	Subgroup2	-0.134459	7.71e-08	0.630799	1.16e-101	-0.369345	3.25e-37	1930	MST-312, MST 312, MST312	Genome integrity	Telomerase	10385095	-0.631279	-0.756656	-0.520921	-0.759326	-0.73653	-0.984512	-0.534114	-0.551523	-0.653131	-0.392811	-0.63988	-0.413734	-0.728953	-0.480921	-0.797424	-0.752089	-0.159207	-0.60639	-0.859922	-0.622103	-0.675438
E2F6	AZ6102	-0.642857	0.00213059	Subgroup2	-0.134459	7.71e-08	0.630799	1.16e-101	-0.369345	3.25e-37	2109	-	WNT signaling	TNKS1, TNKS2	91663328	-0.631279	-0.756656	-0.520921	-0.759326	-0.73653	-0.984512	-0.534114	-0.551523	-0.653131	-0.392811	-0.63988	-0.413734	-0.728953	-0.480921	-0.797424	-0.752089	-0.159207	-0.60639	-0.859922	-0.622103	-0.675438
E2F6	Camptothecin	-0.557312	0.00652305	Subgroup2	-0.134459	7.71e-08	0.630799	1.16e-101	-0.369345	3.25e-37	1003	Camptothecine, (+)-Camptothecin	DNA replication	TOP1	24360	-0.631279	-0.756656	-0.520921	-0.759326	-0.73653	-0.984512	-0.534114	-0.551523	-0.653131	-0.392811	-0.63988	-0.413734	-0.728953	-0.480921	-0.797424	-0.752089	-0.159207	-0.60639	-0.859922	-0.622103	-0.675438
ECT2	Pevonedistat	-0.631423	0.00156993	Subgroup2	-0.293314	1.11e-13	1.19871	1.43e-154	-0.648185	1.89e-45	1529	MLN4924, MLN 4924, MLN-4924	Other	NAE	16720766	-1.4192	-1.47303	-1.41059	-1.226	-2.07716	-1.12478	-1.33048	-1.82251	-1.309	-1.70891	-1.25691	-0.925576	-1.57668	-1.33211	-1.67097	-1.32963	-0.927215	-1.19759	-1.63952	-1.61381	-1.43152
ECT2	AZD7762	-0.641304	0.00126447	Subgroup2	-0.293314	1.11e-13	1.19871	1.43e-154	-0.648185	1.89e-45	1022	AZD-7762, AZD 7762	Cell cycle	CHEK1, CHEK2	11152667	-1.4192	-1.47303	-1.41059	-1.226	-2.07716	-1.12478	-1.33048	-1.82251	-1.309	-1.70891	-1.25691	-0.925576	-1.57668	-1.33211	-1.67097	-1.32963	-0.927215	-1.19759	-1.63952	-1.61381	-1.43152
ECT2	Navitoclax	-0.557143	0.00977181	Subgroup2	-0.293314	1.11e-13	1.19871	1.43e-154	-0.648185	1.89e-45	1011	ABT-263, ABT263, ABT 263	Apoptosis regulation	BCL2, BCL-XL, BCL-W	24978538	-1.4192	-1.47303	-1.41059	-1.226	-2.07716	-1.12478	-1.33048	-1.82251	-1.309	-1.70891	-1.25691	-0.925576	-1.57668	-1.33211	-1.67097	-1.32963	-0.927215	-1.19759	-1.63952	-1.61381	-1.43152
ECT2	MK-1775	-0.623518	0.00185714	Subgroup2	-0.293314	1.11e-13	1.19871	1.43e-154	-0.648185	1.89e-45	1179	AZD1775	Cell cycle	WEE1, PLK1	24856436	-1.4192	-1.47303	-1.41059	-1.226	-2.07716	-1.12478	-1.33048	-1.82251	-1.309	-1.70891	-1.25691	-0.925576	-1.57668	-1.33211	-1.67097	-1.32963	-0.927215	-1.19759	-1.63952	-1.61381	-1.43152
ECT2	AZD6738	-0.537549	0.00907981	Subgroup2	-0.293314	1.11e-13	1.19871	1.43e-154	-0.648185	1.89e-45	1917	AZD 6738, AZD-6738	Genome integrity	ATR	54761306	-1.4192	-1.47303	-1.41059	-1.226	-2.07716	-1.12478	-1.33048	-1.82251	-1.309	-1.70891	-1.25691	-0.925576	-1.57668	-1.33211	-1.67097	-1.32963	-0.927215	-1.19759	-1.63952	-1.61381	-1.43152
ECT2	Entinostat	-0.584211	0.00986849	Subgroup2	-0.293314	1.11e-13	1.19871	1.43e-154	-0.648185	1.89e-45	1593	MS-275	Chromatin histone acetylation	HDAC1, HDAC3	4261	-1.4192	-1.47303	-1.41059	-1.226	-2.07716	-1.12478	-1.33048	-1.82251	-1.309	-1.70891	-1.25691	-0.925576	-1.57668	-1.33211	-1.67097	-1.32963	-0.927215	-1.19759	-1.63952	-1.61381	-1.43152
ECT2	Acetalax	0.591228	0.00886209	Subgroup2	-0.293314	1.11e-13	1.19871	1.43e-154	-0.648185	1.89e-45	1804	Oxyphenisatin acetate	Unclassified	-	-	-1.4192	-1.47303	-1.41059	-1.226	-2.07716	-1.12478	-1.33048	-1.82251	-1.309	-1.70891	-1.25691	-0.925576	-1.57668	-1.33211	-1.67097	-1.32963	-0.927215	-1.19759	-1.63952	-1.61381	-1.43152
ECT2	Dihydrorotenone	0.626316	0.00500009	Subgroup2	-0.293314	1.11e-13	1.19871	1.43e-154	-0.648185	1.89e-45	1827	-	Unclassified	-	-	-1.4192	-1.47303	-1.41059	-1.226	-2.07716	-1.12478	-1.33048	-1.82251	-1.309	-1.70891	-1.25691	-0.925576	-1.57668	-1.33211	-1.67097	-1.32963	-0.927215	-1.19759	-1.63952	-1.61381	-1.43152
ESPL1	AZD6738	-0.585968	0.00390359	Subgroup2	-0.404994	4.35e-33	1.04077	9.08e-154	-0.349314	9.98e-18	1917	AZD 6738, AZD-6738	Genome integrity	ATR	54761306	-1.74102	-1.8061	-1.6527	-1.88	-2.21229	-1.74886	-1.55505	-1.93213	-1.77099	-1.8178	-1.77264	-1.79659	-1.69769	-1.69205	-1.68412	-1.81874	-1.17331	-1.83411	-1.80076	-1.34895	-1.82551
ESPL1	MK-1775	-0.634387	0.00147238	Subgroup2	-0.404994	4.35e-33	1.04077	9.08e-154	-0.349314	9.98e-18	1179	AZD1775	Cell cycle	WEE1, PLK1	24856436	-1.74102	-1.8061	-1.6527	-1.88	-2.21229	-1.74886	-1.55505	-1.93213	-1.77099	-1.8178	-1.77264	-1.79659	-1.69769	-1.69205	-1.68412	-1.81874	-1.17331	-1.83411	-1.80076	-1.34895	-1.82551
ESPL1	AZD7762	-0.589921	0.00362429	Subgroup2	-0.404994	4.35e-33	1.04077	9.08e-154	-0.349314	9.98e-18	1022	AZD-7762, AZD 7762	Cell cycle	CHEK1, CHEK2	11152667	-1.74102	-1.8061	-1.6527	-1.88	-2.21229	-1.74886	-1.55505	-1.93213	-1.77099	-1.8178	-1.77264	-1.79659	-1.69769	-1.69205	-1.68412	-1.81874	-1.17331	-1.83411	-1.80076	-1.34895	-1.82551
FBXO5	PAK_5339	-0.608772	0.00670683	Subgroup2	-0.255724	5.8e-09	1.21245	7.39e-125	-0.713775	4.35e-45	1730	SN1046290829, PAK_5339	Cytoskeleton	PAK1, PAK2	-	-1.02055	-1.07821	-1.16627	-0.839637	-1.29697	-1.03469	-1.20648	-0.957057	-1.01716	-0.866884	-0.67903	-0.718324	-1.1313	-0.932224	-1.32307	-1.36867	-0.747201	-1.13002	-1.0449	-1.07092	-0.80202
FBXO5	AZD7762	-0.550395	0.0073386	Subgroup2	-0.255724	5.8e-09	1.21245	7.39e-125	-0.713775	4.35e-45	1022	AZD-7762, AZD 7762	Cell cycle	CHEK1, CHEK2	11152667	-1.02055	-1.07821	-1.16627	-0.839637	-1.29697	-1.03469	-1.20648	-0.957057	-1.01716	-0.866884	-0.67903	-0.718324	-1.1313	-0.932224	-1.32307	-1.36867	-0.747201	-1.13002	-1.0449	-1.07092	-0.80202
GINS1	AZD7762	-0.603755	0.00277531	Subgroup2	-0.248875	2.25e-12	1.00128	2.82e-130	-0.535936	1.55e-38	1022	AZD-7762, AZD 7762	Cell cycle	CHEK1, CHEK2	11152667	-1.67433	-1.75958	-1.8956	-1.50047	-1.5589	-1.57394	-1.66633	-1.96448	-1.50606	-1.29257	-1.50809	-1.62185	-1.76263	-1.61362	-1.71404	-1.9864	-1.95994	-1.89696	-1.64692	-1.52171	-1.53651
GINS1	MK-1775	-0.576087	0.00468214	Subgroup2	-0.248875	2.25e-12	1.00128	2.82e-130	-0.535936	1.55e-38	1179	AZD1775	Cell cycle	WEE1, PLK1	24856436	-1.67433	-1.75958	-1.8956	-1.50047	-1.5589	-1.57394	-1.66633	-1.96448	-1.50606	-1.29257	-1.50809	-1.62185	-1.76263	-1.61362	-1.71404	-1.9864	-1.95994	-1.89696	-1.64692	-1.52171	-1.53651
GINS1	VE821	-0.677922	0.000999153	Subgroup2	-0.248875	2.25e-12	1.00128	2.82e-130	-0.535936	1.55e-38	2111	VE 821, VE-821	Genome integrity	ATR	51000408	-1.67433	-1.75958	-1.8956	-1.50047	-1.5589	-1.57394	-1.66633	-1.96448	-1.50606	-1.29257	-1.50809	-1.62185	-1.76263	-1.61362	-1.71404	-1.9864	-1.95994	-1.89696	-1.64692	-1.52171	-1.53651
GINS1	AZD6738	-0.589921	0.00362429	Subgroup2	-0.248875	2.25e-12	1.00128	2.82e-130	-0.535936	1.55e-38	1917	AZD 6738, AZD-6738	Genome integrity	ATR	54761306	-1.67433	-1.75958	-1.8956	-1.50047	-1.5589	-1.57394	-1.66633	-1.96448	-1.50606	-1.29257	-1.50809	-1.62185	-1.76263	-1.61362	-1.71404	-1.9864	-1.95994	-1.89696	-1.64692	-1.52171	-1.53651
GINS2	AZD7762	-0.630435	0.00160363	Subgroup2	-0.492804	3.73e-18	1.78772	1.04e-167	-0.888071	6.75e-41	1022	AZD-7762, AZD 7762	Cell cycle	CHEK1, CHEK2	11152667	-1.96865	-1.99678	-1.92106	-1.99668	-1.99169	-1.97939	-1.82715	-2.24905	-1.71579	-1.42358	-1.91742	-1.96786	-2.19433	-1.5657	-2.33255	-1.87879	-2.11413	-2.65474	-2.09237	-1.77609	-1.77785
HIST1H2BE	EPZ004777	-0.621542	0.00193549	Subgroup2	-0.511282	6.16e-49	0.855509	8.38e-89	-0.0338223	0.454525	1237	EPZ-004777	Chromatin histone methylation	DOT1L	56962336	-0.807898	-1.11056	-1.01193	-0.716071	-1.04294	-0.730653	-0.942363	-1.04475	-0.691663	-0.803594	-0.587969	-0.767051	-1.11135	-0.625452	-1.15958	-0.563255	0.145449	-0.850885	-1.03533	-0.876272	-0.631752
HIST1H2BE	P22077	-0.600791	0.00294145	Subgroup2	-0.511282	6.16e-49	0.855509	8.38e-89	-0.0338223	0.454525	1933	P 22077, P-22077	Protein stability and degradation	USP7, USP47	46931953	-0.807898	-1.11056	-1.01193	-0.716071	-1.04294	-0.730653	-0.942363	-1.04475	-0.691663	-0.803594	-0.587969	-0.767051	-1.11135	-0.625452	-1.15958	-0.563255	0.145449	-0.850885	-1.03533	-0.876272	-0.631752
HIST1H2BE	AMG-319	-0.620553	0.0019757	Subgroup2	-0.511282	6.16e-49	0.855509	8.38e-89	-0.0338223	0.454525	2045	AMG319	PI3K/MTOR signaling	PI3K (beta sparing)	68947304	-0.807898	-1.11056	-1.01193	-0.716071	-1.04294	-0.730653	-0.942363	-1.04475	-0.691663	-0.803594	-0.587969	-0.767051	-1.11135	-0.625452	-1.15958	-0.563255	0.145449	-0.850885	-1.03533	-0.876272	-0.631752
HIST1H2BM	PFI3	-0.659649	0.00272906	Subgroup2	-0.565686	4.07e-54	0.97596	3.61e-106	-0.0635516	0.17625	1620	PFI-3, PFI 3, AOB2221	Chromatin other	Polybromo 1, SMARCA4, SMARCA2	78243717	-0.801317	-0.928469	-0.958951	-0.590886	-0.980005	-0.824595	-0.768325	-1.04135	-0.695802	-0.779833	-0.609008	-0.677383	-0.88552	-0.805248	-0.861319	-0.826461	-0.757205	-1.1666	-0.673137	-0.73718	-0.459062
HIST1H2BM	EPZ5676	-0.616601	0.00214367	Subgroup2	-0.565686	4.07e-54	0.97596	3.61e-106	-0.0635516	0.17625	1563	EPZ-5676, Pinometostat	Chromatin histone methylation	DOT1L	57345410	-0.801317	-0.928469	-0.958951	-0.590886	-0.980005	-0.824595	-0.768325	-1.04135	-0.695802	-0.779833	-0.609008	-0.677383	-0.88552	-0.805248	-0.861319	-0.826461	-0.757205	-1.1666	-0.673137	-0.73718	-0.459062
HIST1H2BM	Fludarabine	-0.621053	0.0054697	Subgroup2	-0.565686	4.07e-54	0.97596	3.61e-106	-0.0635516	0.17625	1813	Fludara	Unclassified	-	-	-0.801317	-0.928469	-0.958951	-0.590886	-0.980005	-0.824595	-0.768325	-1.04135	-0.695802	-0.779833	-0.609008	-0.677383	-0.88552	-0.805248	-0.861319	-0.826461	-0.757205	-1.1666	-0.673137	-0.73718	-0.459062
HSD17B10	Sinularin	-0.657895	0.00282232	Subgroup2	-0.371188	1.43e-57	0.618825	4.73e-105	-0.0225383	0.458016	1838	-	Unclassified	-	-	-0.643848	-0.789275	-0.791966	-0.669194	-0.79644	-0.682014	-0.458177	-0.460228	-1.09302	-1.04084	-0.417134	-0.75049	-0.509036	-0.30571	-0.562303	-0.366338	-0.108254	-0.989745	-0.978562	-0.371699	-0.736529
HSD17B10	Mirin	-0.74386	0.000393093	Subgroup2	-0.371188	1.43e-57	0.618825	4.73e-105	-0.0225383	0.458016	1048	-	Genome integrity	MRE11	none	-0.643848	-0.789275	-0.791966	-0.669194	-0.79644	-0.682014	-0.458177	-0.460228	-1.09302	-1.04084	-0.417134	-0.75049	-0.509036	-0.30571	-0.562303	-0.366338	-0.108254	-0.989745	-0.978562	-0.371699	-0.736529
HSD17B10	VE-822	-0.589474	0.00910547	Subgroup2	-0.371188	1.43e-57	0.618825	4.73e-105	-0.0225383	0.458016	1613	VE 822, VE822, Berzosertib	Genome integrity	ATR	59472121	-0.643848	-0.789275	-0.791966	-0.669194	-0.79644	-0.682014	-0.458177	-0.460228	-1.09302	-1.04084	-0.417134	-0.75049	-0.509036	-0.30571	-0.562303	-0.366338	-0.108254	-0.989745	-0.978562	-0.371699	-0.736529
HSD17B10	GSK2578215A	-0.539526	0.00879148	Subgroup2	-0.371188	1.43e-57	0.618825	4.73e-105	-0.0225383	0.458016	1927	GSK 2578215A, GSK-2578215A	Other, kinases	LRRK2	68107965	-0.643848	-0.789275	-0.791966	-0.669194	-0.79644	-0.682014	-0.458177	-0.460228	-1.09302	-1.04084	-0.417134	-0.75049	-0.509036	-0.30571	-0.562303	-0.366338	-0.108254	-0.989745	-0.978562	-0.371699	-0.736529
INCENP	MK-1775	-0.62253	0.00189597	Subgroup2	-0.438326	1.07e-44	0.968816	4.34e-153	-0.238066	5.2e-10	1179	AZD1775	Cell cycle	WEE1, PLK1	24856436	-1.18793	-1.33417	-1.28066	-1.35145	-1.80627	-1.08852	-1.05871	-1.34327	-1.31421	-1.20457	-1.19471	-1.40573	-1.06518	-1.16617	-0.815277	-1.2469	-0.633724	-1.29936	-1.04491	-0.821459	-1.28343
INCENP	ERK_2440	0.6	0.0077233	Subgroup2	-0.438326	1.07e-44	0.968816	4.34e-153	-0.238066	5.2e-10	1713	SN1051032892, ERK_2440	ERK MAPK signaling	ERK1,ERK2	-	-1.18793	-1.33417	-1.28066	-1.35145	-1.80627	-1.08852	-1.05871	-1.34327	-1.31421	-1.20457	-1.19471	-1.40573	-1.06518	-1.16617	-0.815277	-1.2469	-0.633724	-1.29936	-1.04491	-0.821459	-1.28343
INCENP	AZD6738	-0.731225	0.000113342	Subgroup2	-0.438326	1.07e-44	0.968816	4.34e-153	-0.238066	5.2e-10	1917	AZD 6738, AZD-6738	Genome integrity	ATR	54761306	-1.18793	-1.33417	-1.28066	-1.35145	-1.80627	-1.08852	-1.05871	-1.34327	-1.31421	-1.20457	-1.19471	-1.40573	-1.06518	-1.16617	-0.815277	-1.2469	-0.633724	-1.29936	-1.04491	-0.821459	-1.28343
INCENP	Vorinostat	-0.578063	0.00451679	Subgroup2	-0.438326	1.07e-44	0.968816	4.34e-153	-0.238066	5.2e-10	1012	Zolinza, SAHA, suberanilohydroxamic acid, suberoylanilide hydroxamic acid, MK-0683	Chromatin histone acetylation	HDAC inhibitor Class I, IIa, IIb, IV	5311	-1.18793	-1.33417	-1.28066	-1.35145	-1.80627	-1.08852	-1.05871	-1.34327	-1.31421	-1.20457	-1.19471	-1.40573	-1.06518	-1.16617	-0.815277	-1.2469	-0.633724	-1.29936	-1.04491	-0.821459	-1.28343
INCENP	Cisplatin	-0.623518	0.00185714	Subgroup2	-0.438326	1.07e-44	0.968816	4.34e-153	-0.238066	5.2e-10	1005	cis-Diammineplatinum(II) dichloride, Platinol, CIS-DDP	DNA replication	DNA crosslinker	84691	-1.18793	-1.33417	-1.28066	-1.35145	-1.80627	-1.08852	-1.05871	-1.34327	-1.31421	-1.20457	-1.19471	-1.40573	-1.06518	-1.16617	-0.815277	-1.2469	-0.633724	-1.29936	-1.04491	-0.821459	-1.28343
INCENP	Entospletinib	0.670175	0.00222081	Subgroup2	-0.438326	1.07e-44	0.968816	4.34e-153	-0.238066	5.2e-10	1630	GS-9973	Other, kinases	SYK	59473233	-1.18793	-1.33417	-1.28066	-1.35145	-1.80627	-1.08852	-1.05871	-1.34327	-1.31421	-1.20457	-1.19471	-1.40573	-1.06518	-1.16617	-0.815277	-1.2469	-0.633724	-1.29936	-1.04491	-0.821459	-1.28343
INCENP	AZD7762	-0.581028	0.00427799	Subgroup2	-0.438326	1.07e-44	0.968816	4.34e-153	-0.238066	5.2e-10	1022	AZD-7762, AZD 7762	Cell cycle	CHEK1, CHEK2	11152667	-1.18793	-1.33417	-1.28066	-1.35145	-1.80627	-1.08852	-1.05871	-1.34327	-1.31421	-1.20457	-1.19471	-1.40573	-1.06518	-1.16617	-0.815277	-1.2469	-0.633724	-1.29936	-1.04491	-0.821459	-1.28343
INCENP	Sapitinib	0.571146	0.0051179	Subgroup2	-0.438326	1.07e-44	0.968816	4.34e-153	-0.238066	5.2e-10	1549	AZD8931	EGFR signaling	EGFR, ERBB2, ERBB3	11488320	-1.18793	-1.33417	-1.28066	-1.35145	-1.80627	-1.08852	-1.05871	-1.34327	-1.31421	-1.20457	-1.19471	-1.40573	-1.06518	-1.16617	-0.815277	-1.2469	-0.633724	-1.29936	-1.04491	-0.821459	-1.28343
KIF11	Entinostat	-0.592982	0.00862403	Subgroup2	-0.454962	1.62e-20	1.55845	1.08e-170	-0.738166	1.13e-37	1593	MS-275	Chromatin histone acetylation	HDAC1, HDAC3	4261	-1.92426	-2.02789	-1.82625	-1.84598	-2.37979	-2.04014	-1.89242	-1.9561	-1.74114	-2.17769	-1.75643	-1.96741	-2.04134	-1.59874	-1.75598	-2.06714	-1.33158	-2.23694	-2.07909	-1.86198	-1.90123
KIF11	Vorinostat	-0.531621	0.00999245	Subgroup2	-0.454962	1.62e-20	1.55845	1.08e-170	-0.738166	1.13e-37	1012	Zolinza, SAHA, suberanilohydroxamic acid, suberoylanilide hydroxamic acid, MK-0683	Chromatin histone acetylation	HDAC inhibitor Class I, IIa, IIb, IV	5311	-1.92426	-2.02789	-1.82625	-1.84598	-2.37979	-2.04014	-1.89242	-1.9561	-1.74114	-2.17769	-1.75643	-1.96741	-2.04134	-1.59874	-1.75598	-2.06714	-1.33158	-2.23694	-2.07909	-1.86198	-1.90123
KIF11	MK-1775	-0.586957	0.00383212	Subgroup2	-0.454962	1.62e-20	1.55845	1.08e-170	-0.738166	1.13e-37	1179	AZD1775	Cell cycle	WEE1, PLK1	24856436	-1.92426	-2.02789	-1.82625	-1.84598	-2.37979	-2.04014	-1.89242	-1.9561	-1.74114	-2.17769	-1.75643	-1.96741	-2.04134	-1.59874	-1.75598	-2.06714	-1.33158	-2.23694	-2.07909	-1.86198	-1.90123
KIF14	Gallibiscoquinazole	0.605263	0.00709942	Subgroup2	-0.399418	2.29e-19	1.37128	3.35e-159	-0.650791	9.53e-36	1830	-	Unclassified	-	-	-0.737833	-0.676692	-1.05921	-0.46216	-1.17477	-0.711372	-0.53005	-0.930384	-0.795276	-0.801577	-0.822459	-0.492369	-0.942792	-0.717074	-1.04285	-0.629455	-0.0679554	-0.942223	-0.418686	-0.765378	-0.773928
KIF18A	MK-1775	-0.535573	0.00937597	Subgroup2	-0.673273	8.61e-36	1.87515	2.47e-208	-0.709448	4.21e-28	1179	AZD1775	Cell cycle	WEE1, PLK1	24856436	-1.26261	-1.76524	-1.0181	-1.53241	-1.00549	-1.27802	-1.33503	-1.65256	-0.781444	-1.15401	-1.56637	-1.207	-1.46271	-1.45844	-1.22012	-1.41	-0.951112	-1.75726	-1.28034	-1.17323	-0.243326
KIF18A	AZD6738	-0.599802	0.00299866	Subgroup2	-0.673273	8.61e-36	1.87515	2.47e-208	-0.709448	4.21e-28	1917	AZD 6738, AZD-6738	Genome integrity	ATR	54761306	-1.26261	-1.76524	-1.0181	-1.53241	-1.00549	-1.27802	-1.33503	-1.65256	-0.781444	-1.15401	-1.56637	-1.207	-1.46271	-1.45844	-1.22012	-1.41	-0.951112	-1.75726	-1.28034	-1.17323	-0.243326
KIF18A	AZD7762	-0.610672	0.00241815	Subgroup2	-0.673273	8.61e-36	1.87515	2.47e-208	-0.709448	4.21e-28	1022	AZD-7762, AZD 7762	Cell cycle	CHEK1, CHEK2	11152667	-1.26261	-1.76524	-1.0181	-1.53241	-1.00549	-1.27802	-1.33503	-1.65256	-0.781444	-1.15401	-1.56637	-1.207	-1.46271	-1.45844	-1.22012	-1.41	-0.951112	-1.75726	-1.28034	-1.17323	-0.243326
KPNB1	ML323	-0.596491	0.00816354	Subgroup2	-0.248774	7.1e-24	0.6024	7.49e-91	-0.181785	1.09e-09	1629	GTPL7898, AOB2313,	Protein stability and degradation	USP1, UAF1	60167849	-1.79558	-1.77706	-2.11024	-1.76208	-2.21704	-1.78822	-1.69285	-1.83526	-1.84702	-1.49605	-1.6896	-1.80296	-1.71694	-1.70718	-1.38723	-2.04703	-1.76135	-1.84501	-1.67258	-1.97945	-1.77647
LSM4	ABT737	-0.536561	0.0092269	Subgroup2	-0.418318	1.05e-55	0.85949	2.6e-166	-0.169373	2.91e-07	1910	-	Apoptosis regulation	BCL2, BCL-XL, BCL-W, BCL-B, BFL1	11228183	-0.996826	-1.17343	-1.13553	-1.15582	-1.10127	-1.08472	-0.994779	-1.22073	-1.09572	-1.33503	-1.32572	-1.1303	-0.877727	-1.04347	-0.768537	-0.985484	0.0680341	-1.01209	-0.88581	-0.787467	-0.890932
LSM4	WEHI-539	-0.650198	0.00103404	Subgroup2	-0.418318	1.05e-55	0.85949	2.6e-166	-0.169373	2.91e-07	1997	WEHI539, WEHI-539	Apoptosis regulation	BCL-XL	71297207	-0.996826	-1.17343	-1.13553	-1.15582	-1.10127	-1.08472	-0.994779	-1.22073	-1.09572	-1.33503	-1.32572	-1.1303	-0.877727	-1.04347	-0.768537	-0.985484	0.0680341	-1.01209	-0.88581	-0.787467	-0.890932
LSM4	MK-2206	-0.62253	0.00189597	Subgroup2	-0.418318	1.05e-55	0.85949	2.6e-166	-0.169373	2.91e-07	1053	MK 2206, MK2206	PI3K/MTOR signaling	AKT1, AKT2	46930998	-0.996826	-1.17343	-1.13553	-1.15582	-1.10127	-1.08472	-0.994779	-1.22073	-1.09572	-1.33503	-1.32572	-1.1303	-0.877727	-1.04347	-0.768537	-0.985484	0.0680341	-1.01209	-0.88581	-0.787467	-0.890932
LSM4	PCI-34051	-0.633333	0.00442571	Subgroup2	-0.418318	1.05e-55	0.85949	2.6e-166	-0.169373	2.91e-07	1621	AK298746	Chromatin histone acetylation	HDAC8, HDAC6, HDAC1	24753719	-0.996826	-1.17343	-1.13553	-1.15582	-1.10127	-1.08472	-0.994779	-1.22073	-1.09572	-1.33503	-1.32572	-1.1303	-0.877727	-1.04347	-0.768537	-0.985484	0.0680341	-1.01209	-0.88581	-0.787467	-0.890932
LSM5	BIBR-1532	0.540514	0.00865021	Subgroup2	-0.157021	4.4e-10	0.594909	2.53e-87	-0.305427	4.32e-25	2043	-	Genome integrity	TERT	9927531	-0.815537	-0.70489	-0.799776	-1.03354	-0.776894	-0.563202	-0.774407	-1.28326	-0.849251	-0.814497	-0.562804	-1.20836	-0.590418	-0.737598	-1.04132	-0.89266	-0.789876	-0.936603	-0.479845	-0.885062	-0.586474
LSM5	Ibrutinib	-0.717544	0.000783412	Subgroup2	-0.157021	4.4e-10	0.594909	2.53e-87	-0.305427	4.32e-25	1799	PCI-32765, CRA-032765, PCI-32765-00	Other, kinases	BTK	24821094	-0.815537	-0.70489	-0.799776	-1.03354	-0.776894	-0.563202	-0.774407	-1.28326	-0.849251	-0.814497	-0.562804	-1.20836	-0.590418	-0.737598	-1.04132	-0.89266	-0.789876	-0.936603	-0.479845	-0.885062	-0.586474
LSM5	Gallibiscoquinazole	0.684211	0.00166562	Subgroup2	-0.157021	4.4e-10	0.594909	2.53e-87	-0.305427	4.32e-25	1830	-	Unclassified	-	-	-0.815537	-0.70489	-0.799776	-1.03354	-0.776894	-0.563202	-0.774407	-1.28326	-0.849251	-0.814497	-0.562804	-1.20836	-0.590418	-0.737598	-1.04132	-0.89266	-0.789876	-0.936603	-0.479845	-0.885062	-0.586474
MAD2L1	MK-1775	-0.579051	0.00443597	Subgroup2	-0.542173	2.55e-22	1.76166	5.89e-167	-0.794811	1.45e-33	1179	AZD1775	Cell cycle	WEE1, PLK1	24856436	-0.901687	-1.16857	-0.959744	-0.75903	-1.38845	-0.737382	-0.751813	-1.4015	-0.927011	-0.555304	-1.00815	-0.827971	-0.884192	-0.877126	-0.638022	-1.18493	-1.23736	-0.35566	-0.566707	-0.931168	-0.873648
MAD2L1	MK-8776	-0.541502	0.00851083	Subgroup2	-0.542173	2.55e-22	1.76166	5.89e-167	-0.794811	1.45e-33	2046	SCH900776	Cell cycle	CHEK1, CHEK2, CDK2	16224745	-0.901687	-1.16857	-0.959744	-0.75903	-1.38845	-0.737382	-0.751813	-1.4015	-0.927011	-0.555304	-1.00815	-0.827971	-0.884192	-0.877126	-0.638022	-1.18493	-1.23736	-0.35566	-0.566707	-0.931168	-0.873648
MAD2L1	AZD7762	-0.592885	0.00342603	Subgroup2	-0.542173	2.55e-22	1.76166	5.89e-167	-0.794811	1.45e-33	1022	AZD-7762, AZD 7762	Cell cycle	CHEK1, CHEK2	11152667	-0.901687	-1.16857	-0.959744	-0.75903	-1.38845	-0.737382	-0.751813	-1.4015	-0.927011	-0.555304	-1.00815	-0.827971	-0.884192	-0.877126	-0.638022	-1.18493	-1.23736	-0.35566	-0.566707	-0.931168	-0.873648
MASTL	PCI-34051	-0.659649	0.00272906	Subgroup2	-0.302356	2.78e-23	0.953627	1.01e-163	-0.417662	3.78e-31	1621	AK298746	Chromatin histone acetylation	HDAC8, HDAC6, HDAC1	24753719	-1.82746	-1.77981	-1.80012	-1.59626	-2.71222	-2.01891	-1.80278	-2.39534	-1.68249	-2.27607	-1.79842	-1.50375	-2.11681	-1.65056	-1.5415	-1.71862	-1.19504	-1.69129	-1.93755	-1.66166	-1.67003
MASTL	Vorinostat	-0.534585	0.00952703	Subgroup2	-0.302356	2.78e-23	0.953627	1.01e-163	-0.417662	3.78e-31	1012	Zolinza, SAHA, suberanilohydroxamic acid, suberoylanilide hydroxamic acid, MK-0683	Chromatin histone acetylation	HDAC inhibitor Class I, IIa, IIb, IV	5311	-1.82746	-1.77981	-1.80012	-1.59626	-2.71222	-2.01891	-1.80278	-2.39534	-1.68249	-2.27607	-1.79842	-1.50375	-2.11681	-1.65056	-1.5415	-1.71862	-1.19504	-1.69129	-1.93755	-1.66166	-1.67003
MASTL	MK-1775	-0.54249	0.00837334	Subgroup2	-0.302356	2.78e-23	0.953627	1.01e-163	-0.417662	3.78e-31	1179	AZD1775	Cell cycle	WEE1, PLK1	24856436	-1.82746	-1.77981	-1.80012	-1.59626	-2.71222	-2.01891	-1.80278	-2.39534	-1.68249	-2.27607	-1.79842	-1.50375	-2.11681	-1.65056	-1.5415	-1.71862	-1.19504	-1.69129	-1.93755	-1.66166	-1.67003
MCM2	MK-1775	-0.538538	0.00893468	Subgroup2	-0.636841	2.54e-52	1.5472	7.88e-238	-0.46989	3.24e-20	1179	AZD1775	Cell cycle	WEE1, PLK1	24856436	-1.35453	-1.47209	-1.38367	-1.39197	-1.63965	-1.35163	-1.24885	-1.63751	-1.28064	-1.26597	-1.13644	-1.6731	-1.35684	-0.989899	-1.66319	-1.58183	-1.02626	-1.13998	-1.45913	-0.954498	-1.43748
MCM2	WZ4003	-0.62807	0.00485109	Subgroup2	-0.636841	2.54e-52	1.5472	7.88e-238	-0.46989	3.24e-20	1614	WZ 4003	Other, kinases	NUAK1, NUAK2	72200024	-1.35453	-1.47209	-1.38367	-1.39197	-1.63965	-1.35163	-1.24885	-1.63751	-1.28064	-1.26597	-1.13644	-1.6731	-1.35684	-0.989899	-1.66319	-1.58183	-1.02626	-1.13998	-1.45913	-0.954498	-1.43748
MCM4	AZD7762	-0.641304	0.00126447	Subgroup2	-0.107876	0.000948651	0.845192	1.13e-110	-0.597522	3.26e-59	1022	AZD-7762, AZD 7762	Cell cycle	CHEK1, CHEK2	11152667	-1.27987	-1.38495	-1.4703	-1.05354	-1.71385	-0.98069	-1.08419	-1.54245	-1.32733	-1.22075	-1.26159	-1.38214	-1.44284	-1.36208	-1.36892	-1.12289	-1.4068	-1.30226	-0.971299	-1.11347	-1.08507
MCM6	Ibrutinib	-0.636842	0.00415945	Subgroup2	-0.449704	3.55e-31	1.19225	3.41e-154	-0.42037	1.68e-19	1799	PCI-32765, CRA-032765, PCI-32765-00	Other, kinases	BTK	24821094	-1.05377	-1.07181	-1.13339	-1.15563	-0.832024	-1.10248	-0.951862	-1.22209	-1.04539	-0.688271	-0.94119	-1.07419	-1.03151	-0.947066	-1.22071	-1.1146	-1.02987	-0.958345	-1.31428	-1.1834	-1.05728
MCM6	Navitoclax	-0.623377	0.00312255	Subgroup2	-0.449704	3.55e-31	1.19225	3.41e-154	-0.42037	1.68e-19	1011	ABT-263, ABT263, ABT 263	Apoptosis regulation	BCL2, BCL-XL, BCL-W	24978538	-1.05377	-1.07181	-1.13339	-1.15563	-0.832024	-1.10248	-0.951862	-1.22209	-1.04539	-0.688271	-0.94119	-1.07419	-1.03151	-0.947066	-1.22071	-1.1146	-1.02987	-0.958345	-1.31428	-1.1834	-1.05728
MCM6	ABT737	-0.605731	0.002669	Subgroup2	-0.449704	3.55e-31	1.19225	3.41e-154	-0.42037	1.68e-19	1910	-	Apoptosis regulation	BCL2, BCL-XL, BCL-W, BCL-B, BFL1	11228183	-1.05377	-1.07181	-1.13339	-1.15563	-0.832024	-1.10248	-0.951862	-1.22209	-1.04539	-0.688271	-0.94119	-1.07419	-1.03151	-0.947066	-1.22071	-1.1146	-1.02987	-0.958345	-1.31428	-1.1834	-1.05728
MCM6	Gallibiscoquinazole	0.591228	0.00886209	Subgroup2	-0.449704	3.55e-31	1.19225	3.41e-154	-0.42037	1.68e-19	1830	-	Unclassified	-	-	-1.05377	-1.07181	-1.13339	-1.15563	-0.832024	-1.10248	-0.951862	-1.22209	-1.04539	-0.688271	-0.94119	-1.07419	-1.03151	-0.947066	-1.22071	-1.1146	-1.02987	-0.958345	-1.31428	-1.1834	-1.05728
MCM6	PCI-34051	-0.585965	0.00960858	Subgroup2	-0.449704	3.55e-31	1.19225	3.41e-154	-0.42037	1.68e-19	1621	AK298746	Chromatin histone acetylation	HDAC8, HDAC6, HDAC1	24753719	-1.05377	-1.07181	-1.13339	-1.15563	-0.832024	-1.10248	-0.951862	-1.22209	-1.04539	-0.688271	-0.94119	-1.07419	-1.03151	-0.947066	-1.22071	-1.1146	-1.02987	-0.958345	-1.31428	-1.1834	-1.05728
MCM6	WEHI-539	-0.562253	0.00598818	Subgroup2	-0.449704	3.55e-31	1.19225	3.41e-154	-0.42037	1.68e-19	1997	WEHI539, WEHI-539	Apoptosis regulation	BCL-XL	71297207	-1.05377	-1.07181	-1.13339	-1.15563	-0.832024	-1.10248	-0.951862	-1.22209	-1.04539	-0.688271	-0.94119	-1.07419	-1.03151	-0.947066	-1.22071	-1.1146	-1.02987	-0.958345	-1.31428	-1.1834	-1.05728
MCM7	WEHI-539	-0.610672	0.00241815	Subgroup2	0.123061	0.000229855	0.618086	6.84e-53	-0.723749	1.21e-84	1997	WEHI539, WEHI-539	Apoptosis regulation	BCL-XL	71297207	-1.43289	-1.57396	-1.50773	-1.43867	-1.59036	-1.37153	-1.2887	-1.63816	-1.47313	-1.67625	-1.39474	-1.27497	-1.41605	-1.66268	-1.5837	-1.17124	-1.01841	-1.3564	-1.51901	-1.35467	-1.34742
MRPL21	MK-2206	0.579051	0.00443597	Subgroup2	-0.339945	5.38e-39	0.65828	5.44e-96	-0.101949	0.00159771	1053	MK 2206, MK2206	PI3K/MTOR signaling	AKT1, AKT2	46930998	-1.19447	-1.14109	-1.31262	-0.919483	-1.33886	-1.35243	-0.938077	-1.14058	-1.28495	-1.16045	-1.4012	-1.40737	-1.3879	-0.898717	-0.87728	-1.1717	-1.28986	-1.40686	-1.19103	-1.05522	-1.21365
MRPS23	Venetoclax	0.587945	0.00376175	Subgroup2	-0.279152	2.06e-24	0.74952	5.11e-118	-0.26932	2.3e-16	1909	ABT-199, Veneclexta, GDC-0199	Apoptosis regulation	BCL2	49846579	-0.984154	-0.900773	-1.02146	-0.704128	-1.13372	-1.02619	-0.757575	-0.936277	-1.13083	-0.726225	-0.670167	-1.33204	-1.03039	-0.714226	-0.994094	-0.883662	-0.742192	-1.61345	-1.36584	-0.845325	-1.15451
MRPS23	ABT737	0.536561	0.0092269	Subgroup2	-0.279152	2.06e-24	0.74952	5.11e-118	-0.26932	2.3e-16	1910	-	Apoptosis regulation	BCL2, BCL-XL, BCL-W, BCL-B, BFL1	11228183	-0.984154	-0.900773	-1.02146	-0.704128	-1.13372	-1.02619	-0.757575	-0.936277	-1.13083	-0.726225	-0.670167	-1.33204	-1.03039	-0.714226	-0.994094	-0.883662	-0.742192	-1.61345	-1.36584	-0.845325	-1.15451
MRPS23	AMG-319	0.541502	0.00851083	Subgroup2	-0.279152	2.06e-24	0.74952	5.11e-118	-0.26932	2.3e-16	2045	AMG319	PI3K/MTOR signaling	PI3K (beta sparing)	68947304	-0.984154	-0.900773	-1.02146	-0.704128	-1.13372	-1.02619	-0.757575	-0.936277	-1.13083	-0.726225	-0.670167	-1.33204	-1.03039	-0.714226	-0.994094	-0.883662	-0.742192	-1.61345	-1.36584	-0.845325	-1.15451
MYBL2	MK-1775	-0.574111	0.00485254	Subgroup2	-0.74841	5.39e-47	1.73566	1.86e-183	-0.478846	4.78e-14	1179	AZD1775	Cell cycle	WEE1, PLK1	24856436	-0.812053	-0.736584	-1.03159	-1.04615	-0.896479	-0.799585	-1.17423	-0.910578	-0.729691	-0.716935	-0.796028	-0.314099	-0.455381	-0.880471	-0.754356	-0.749696	-1.20066	-0.527067	-0.828304	-0.653442	-1.03972
MYBL2	AZD7762	-0.576087	0.00468214	Subgroup2	-0.74841	5.39e-47	1.73566	1.86e-183	-0.478846	4.78e-14	1022	AZD-7762, AZD 7762	Cell cycle	CHEK1, CHEK2	11152667	-0.812053	-0.736584	-1.03159	-1.04615	-0.896479	-0.799585	-1.17423	-0.910578	-0.729691	-0.716935	-0.796028	-0.314099	-0.455381	-0.880471	-0.754356	-0.749696	-1.20066	-0.527067	-0.828304	-0.653442	-1.03972
MYBL2	AZD6738	-0.576087	0.00468214	Subgroup2	-0.74841	5.39e-47	1.73566	1.86e-183	-0.478846	4.78e-14	1917	AZD 6738, AZD-6738	Genome integrity	ATR	54761306	-0.812053	-0.736584	-1.03159	-1.04615	-0.896479	-0.799585	-1.17423	-0.910578	-0.729691	-0.716935	-0.796028	-0.314099	-0.455381	-0.880471	-0.754356	-0.749696	-1.20066	-0.527067	-0.828304	-0.653442	-1.03972
NDC80	AZD7762	-0.550395	0.0073386	Subgroup2	-0.583705	1.19e-28	1.62036	2.29e-155	-0.610327	2.95e-22	1022	AZD-7762, AZD 7762	Cell cycle	CHEK1, CHEK2	11152667	-1.4907	-1.62778	-1.51991	-1.28445	-1.6424	-1.66846	-1.35154	-1.72784	-1.558	-1.86175	-1.21499	-1.12234	-1.39355	-1.64015	-1.70257	-1.42995	-1.00365	-1.49404	-1.50117	-1.62612	-1.44333
NDC80	AZD6738	-0.619565	0.00201661	Subgroup2	-0.583705	1.19e-28	1.62036	2.29e-155	-0.610327	2.95e-22	1917	AZD 6738, AZD-6738	Genome integrity	ATR	54761306	-1.4907	-1.62778	-1.51991	-1.28445	-1.6424	-1.66846	-1.35154	-1.72784	-1.558	-1.86175	-1.21499	-1.12234	-1.39355	-1.64015	-1.70257	-1.42995	-1.00365	-1.49404	-1.50117	-1.62612	-1.44333
NUF2	AZD7762	-0.571146	0.0051179	Subgroup2	-0.517808	2.69e-15	1.97262	5.53e-151	-1.01679	2.02e-40	1022	AZD-7762, AZD 7762	Cell cycle	CHEK1, CHEK2	11152667	-1.37071	-1.51955	-1.4826	-1.13042	-1.84405	-1.05984	-1.13788	-1.65205	-1.26902	-1.36975	-1.44468	-1.25903	-1.57814	-1.41844	-1.3484	-1.35425	-1.45654	-1.31629	-1.11348	-1.22842	-1.43144
NUF2	Gallibiscoquinazole	0.615789	0.00597476	Subgroup2	-0.517808	2.69e-15	1.97262	5.53e-151	-1.01679	2.02e-40	1830	-	Unclassified	-	-	-1.37071	-1.51955	-1.4826	-1.13042	-1.84405	-1.05984	-1.13788	-1.65205	-1.26902	-1.36975	-1.44468	-1.25903	-1.57814	-1.41844	-1.3484	-1.35425	-1.45654	-1.31629	-1.11348	-1.22842	-1.43144
NUF2	Navitoclax	-0.611688	0.00388348	Subgroup2	-0.517808	2.69e-15	1.97262	5.53e-151	-1.01679	2.02e-40	1011	ABT-263, ABT263, ABT 263	Apoptosis regulation	BCL2, BCL-XL, BCL-W	24978538	-1.37071	-1.51955	-1.4826	-1.13042	-1.84405	-1.05984	-1.13788	-1.65205	-1.26902	-1.36975	-1.44468	-1.25903	-1.57814	-1.41844	-1.3484	-1.35425	-1.45654	-1.31629	-1.11348	-1.22842	-1.43144
NUF2	Vorinostat	-0.587945	0.00376175	Subgroup2	-0.517808	2.69e-15	1.97262	5.53e-151	-1.01679	2.02e-40	1012	Zolinza, SAHA, suberanilohydroxamic acid, suberoylanilide hydroxamic acid, MK-0683	Chromatin histone acetylation	HDAC inhibitor Class I, IIa, IIb, IV	5311	-1.37071	-1.51955	-1.4826	-1.13042	-1.84405	-1.05984	-1.13788	-1.65205	-1.26902	-1.36975	-1.44468	-1.25903	-1.57814	-1.41844	-1.3484	-1.35425	-1.45654	-1.31629	-1.11348	-1.22842	-1.43144
NUF2	Entinostat	-0.705263	0.00104802	Subgroup2	-0.517808	2.69e-15	1.97262	5.53e-151	-1.01679	2.02e-40	1593	MS-275	Chromatin histone acetylation	HDAC1, HDAC3	4261	-1.37071	-1.51955	-1.4826	-1.13042	-1.84405	-1.05984	-1.13788	-1.65205	-1.26902	-1.36975	-1.44468	-1.25903	-1.57814	-1.41844	-1.3484	-1.35425	-1.45654	-1.31629	-1.11348	-1.22842	-1.43144
NUF2	MK-1775	-0.608696	0.00251599	Subgroup2	-0.517808	2.69e-15	1.97262	5.53e-151	-1.01679	2.02e-40	1179	AZD1775	Cell cycle	WEE1, PLK1	24856436	-1.37071	-1.51955	-1.4826	-1.13042	-1.84405	-1.05984	-1.13788	-1.65205	-1.26902	-1.36975	-1.44468	-1.25903	-1.57814	-1.41844	-1.3484	-1.35425	-1.45654	-1.31629	-1.11348	-1.22842	-1.43144
NUF2	Acetalax	0.642105	0.00378473	Subgroup2	-0.517808	2.69e-15	1.97262	5.53e-151	-1.01679	2.02e-40	1804	Oxyphenisatin acetate	Unclassified	-	-	-1.37071	-1.51955	-1.4826	-1.13042	-1.84405	-1.05984	-1.13788	-1.65205	-1.26902	-1.36975	-1.44468	-1.25903	-1.57814	-1.41844	-1.3484	-1.35425	-1.45654	-1.31629	-1.11348	-1.22842	-1.43144
NUP107	AMG-319	0.579051	0.00443597	Subgroup2	-0.139441	1.13e-07	0.618307	4.64e-87	-0.351174	1.66e-30	2045	AMG319	PI3K/MTOR signaling	PI3K (beta sparing)	68947304	-0.780594	-0.665439	-0.722723	-0.791101	-0.96948	-0.838565	-0.860943	-0.775609	-0.803272	-0.829573	-0.749431	-0.600561	-0.735218	-1.02818	-0.341747	-1.01814	-0.810413	-0.791817	-0.397963	-1.06781	-0.813888
NUP93	Vincristine	-0.666667	0.00238082	Subgroup2	-0.351103	8.38e-58	0.598956	3.2e-111	-0.0334132	0.238859	1818	-	Mitosis	-	-	-1.40672	-1.33806	-1.41933	-1.19651	-1.43476	-1.36304	-1.30658	-1.81929	-1.45879	-1.44348	-1.14706	-1.56805	-1.6768	-1.61411	-1.55223	-1.15696	-0.919653	-1.65937	-1.18469	-1.65594	-1.21961
NUP93	AMG-319	0.537549	0.00907981	Subgroup2	-0.351103	8.38e-58	0.598956	3.2e-111	-0.0334132	0.238859	2045	AMG319	PI3K/MTOR signaling	PI3K (beta sparing)	68947304	-1.40672	-1.33806	-1.41933	-1.19651	-1.43476	-1.36304	-1.30658	-1.81929	-1.45879	-1.44348	-1.14706	-1.56805	-1.6768	-1.61411	-1.55223	-1.15696	-0.919653	-1.65937	-1.18469	-1.65594	-1.21961
NUP93	Obatoclax Mesylate	-0.638596	0.00403132	Subgroup2	-0.351103	8.38e-58	0.598956	3.2e-111	-0.0334132	0.238859	1068	GX15-070MS, Obatoclax, GX15-070	Apoptosis regulation	BCL2, BCL-XL, BCL-W, MCL1	11404337	-1.40672	-1.33806	-1.41933	-1.19651	-1.43476	-1.36304	-1.30658	-1.81929	-1.45879	-1.44348	-1.14706	-1.56805	-1.6768	-1.61411	-1.55223	-1.15696	-0.919653	-1.65937	-1.18469	-1.65594	-1.21961
NUP93	AZ960	-0.605263	0.00709942	Subgroup2	-0.351103	8.38e-58	0.598956	3.2e-111	-0.0334132	0.238859	1250	AZ 960, AZ-960	Other, kinases	JAK2, JAK3	25099184	-1.40672	-1.33806	-1.41933	-1.19651	-1.43476	-1.36304	-1.30658	-1.81929	-1.45879	-1.44348	-1.14706	-1.56805	-1.6768	-1.61411	-1.55223	-1.15696	-0.919653	-1.65937	-1.18469	-1.65594	-1.21961
NUP93	CDK9_5576	-0.626316	0.00500009	Subgroup2	-0.351103	8.38e-58	0.598956	3.2e-111	-0.0334132	0.238859	1708	SN1047226266, CDK9_5576	Cell cycle	CDK9	-	-1.40672	-1.33806	-1.41933	-1.19651	-1.43476	-1.36304	-1.30658	-1.81929	-1.45879	-1.44348	-1.14706	-1.56805	-1.6768	-1.61411	-1.55223	-1.15696	-0.919653	-1.65937	-1.18469	-1.65594	-1.21961
NUP93	AZD5991	-0.617544	0.00580234	Subgroup2	-0.351103	8.38e-58	0.598956	3.2e-111	-0.0334132	0.238859	1720	SN1049446612, AZD5991	Apoptosis regulation	MCL1	-	-1.40672	-1.33806	-1.41933	-1.19651	-1.43476	-1.36304	-1.30658	-1.81929	-1.45879	-1.44348	-1.14706	-1.56805	-1.6768	-1.61411	-1.55223	-1.15696	-0.919653	-1.65937	-1.18469	-1.65594	-1.21961
NUP93	Alisertib	-0.65614	0.00291815	Subgroup2	-0.351103	8.38e-58	0.598956	3.2e-111	-0.0334132	0.238859	1051	MLN8237	Mitosis	AURKA	24771867	-1.40672	-1.33806	-1.41933	-1.19651	-1.43476	-1.36304	-1.30658	-1.81929	-1.45879	-1.44348	-1.14706	-1.56805	-1.6768	-1.61411	-1.55223	-1.15696	-0.919653	-1.65937	-1.18469	-1.65594	-1.21961
NUP93	Podophyllotoxin bromide	-0.692982	0.00138008	Subgroup2	-0.351103	8.38e-58	0.598956	3.2e-111	-0.0334132	0.238859	1825	-	Unclassified	-	-	-1.40672	-1.33806	-1.41933	-1.19651	-1.43476	-1.36304	-1.30658	-1.81929	-1.45879	-1.44348	-1.14706	-1.56805	-1.6768	-1.61411	-1.55223	-1.15696	-0.919653	-1.65937	-1.18469	-1.65594	-1.21961
OIP5	PD0325901	0.545455	0.00797191	Subgroup2	-0.65657	1.34e-41	1.65221	4.66e-194	-0.53515	9.47e-20	1060	PD-0325901, PD 0325901	ERK MAPK signaling	MEK1, MEK2	9826528	-1.20937	-1.27482	-1.06141	-0.969991	-1.41374	-1.24912	-1.16102	-1.14971	-1.16563	-1.40291	-1.28525	-1.66656	-1.32337	-1.2923	-1.17663	-1.04292	-0.354177	-1.36881	-1.16359	-1.24015	-1.42524
OIP5	RVX-208	0.6	0.0077233	Subgroup2	-0.65657	1.34e-41	1.65221	4.66e-194	-0.53515	9.47e-20	1625	1044870-39-4, Apabetalone	Chromatin other	BRD4	24871506	-1.20937	-1.27482	-1.06141	-0.969991	-1.41374	-1.24912	-1.16102	-1.14971	-1.16563	-1.40291	-1.28525	-1.66656	-1.32337	-1.2923	-1.17663	-1.04292	-0.354177	-1.36881	-1.16359	-1.24015	-1.42524
OIP5	Selumetinib	0.747368	0.000355578	Subgroup2	-0.65657	1.34e-41	1.65221	4.66e-194	-0.53515	9.47e-20	1736	SN1103949345, AZD1480	ERK MAPK signaling	MEK1, MEK2	-	-1.20937	-1.27482	-1.06141	-0.969991	-1.41374	-1.24912	-1.16102	-1.14971	-1.16563	-1.40291	-1.28525	-1.66656	-1.32337	-1.2923	-1.17663	-1.04292	-0.354177	-1.36881	-1.16359	-1.24015	-1.42524
OIP5	MIRA-1	0.550395	0.0073386	Subgroup2	-0.65657	1.34e-41	1.65221	4.66e-194	-0.53515	9.47e-20	1931	MIRA 1, MIRA1, NSC19630, NSC-19630, NSC 19630	p53 pathway	TP53	227681	-1.20937	-1.27482	-1.06141	-0.969991	-1.41374	-1.24912	-1.16102	-1.14971	-1.16563	-1.40291	-1.28525	-1.66656	-1.32337	-1.2923	-1.17663	-1.04292	-0.354177	-1.36881	-1.16359	-1.24015	-1.42524
OIP5	Sapitinib	0.582016	0.00420078	Subgroup2	-0.65657	1.34e-41	1.65221	4.66e-194	-0.53515	9.47e-20	1549	AZD8931	EGFR signaling	EGFR, ERBB2, ERBB3	11488320	-1.20937	-1.27482	-1.06141	-0.969991	-1.41374	-1.24912	-1.16102	-1.14971	-1.16563	-1.40291	-1.28525	-1.66656	-1.32337	-1.2923	-1.17663	-1.04292	-0.354177	-1.36881	-1.16359	-1.24015	-1.42524
OIP5	AZD7762	-0.555336	0.00674791	Subgroup2	-0.65657	1.34e-41	1.65221	4.66e-194	-0.53515	9.47e-20	1022	AZD-7762, AZD 7762	Cell cycle	CHEK1, CHEK2	11152667	-1.20937	-1.27482	-1.06141	-0.969991	-1.41374	-1.24912	-1.16102	-1.14971	-1.16563	-1.40291	-1.28525	-1.66656	-1.32337	-1.2923	-1.17663	-1.04292	-0.354177	-1.36881	-1.16359	-1.24015	-1.42524
OIP5	CZC24832	0.666667	0.00238082	Subgroup2	-0.65657	1.34e-41	1.65221	4.66e-194	-0.53515	9.47e-20	1615	GTPL6653	PI3K/MTOR signaling	PI3Kgamma	42623951	-1.20937	-1.27482	-1.06141	-0.969991	-1.41374	-1.24912	-1.16102	-1.14971	-1.16563	-1.40291	-1.28525	-1.66656	-1.32337	-1.2923	-1.17663	-1.04292	-0.354177	-1.36881	-1.16359	-1.24015	-1.42524
OIP5	SCH772984	0.650198	0.00103404	Subgroup2	-0.65657	1.34e-41	1.65221	4.66e-194	-0.53515	9.47e-20	1564	CS-1421	ERK MAPK signaling	ERK1, ERK2	24866313	-1.20937	-1.27482	-1.06141	-0.969991	-1.41374	-1.24912	-1.16102	-1.14971	-1.16563	-1.40291	-1.28525	-1.66656	-1.32337	-1.2923	-1.17663	-1.04292	-0.354177	-1.36881	-1.16359	-1.24015	-1.42524
OIP5	Trametinib	0.623518	0.00185714	Subgroup2	-0.65657	1.34e-41	1.65221	4.66e-194	-0.53515	9.47e-20	1372	GSK1120212, Mekinist	ERK MAPK signaling	MEK1, MEK2	11707110	-1.20937	-1.27482	-1.06141	-0.969991	-1.41374	-1.24912	-1.16102	-1.14971	-1.16563	-1.40291	-1.28525	-1.66656	-1.32337	-1.2923	-1.17663	-1.04292	-0.354177	-1.36881	-1.16359	-1.24015	-1.42524
OIP5	EPZ5676	0.568182	0.00539533	Subgroup2	-0.65657	1.34e-41	1.65221	4.66e-194	-0.53515	9.47e-20	1563	EPZ-5676, Pinometostat	Chromatin histone methylation	DOT1L	57345410	-1.20937	-1.27482	-1.06141	-0.969991	-1.41374	-1.24912	-1.16102	-1.14971	-1.16563	-1.40291	-1.28525	-1.66656	-1.32337	-1.2923	-1.17663	-1.04292	-0.354177	-1.36881	-1.16359	-1.24015	-1.42524
OIP5	ERK_2440	0.594737	0.00839121	Subgroup2	-0.65657	1.34e-41	1.65221	4.66e-194	-0.53515	9.47e-20	1713	SN1051032892, ERK_2440	ERK MAPK signaling	ERK1,ERK2	-	-1.20937	-1.27482	-1.06141	-0.969991	-1.41374	-1.24912	-1.16102	-1.14971	-1.16563	-1.40291	-1.28525	-1.66656	-1.32337	-1.2923	-1.17663	-1.04292	-0.354177	-1.36881	-1.16359	-1.24015	-1.42524
OIP5	ERK_6604	0.663158	0.0025501	Subgroup2	-0.65657	1.34e-41	1.65221	4.66e-194	-0.53515	9.47e-20	1714	SN1047587618, ERK_6604	ERK MAPK signaling	ERK1,ERK2	-	-1.20937	-1.27482	-1.06141	-0.969991	-1.41374	-1.24912	-1.16102	-1.14971	-1.16563	-1.40291	-1.28525	-1.66656	-1.32337	-1.2923	-1.17663	-1.04292	-0.354177	-1.36881	-1.16359	-1.24015	-1.42524
PCNA	Navitoclax	-0.593506	0.0053697	Subgroup2	-0.368956	1.99e-21	1.20137	3.19e-159	-0.543137	1.92e-32	1011	ABT-263, ABT263, ABT 263	Apoptosis regulation	BCL2, BCL-XL, BCL-W	24978538	-1.88239	-1.79137	-1.98755	-1.53374	-1.92073	-2.07472	-1.69014	-1.94818	-1.75612	-2.20304	-1.83124	-1.62537	-2.0507	-1.6362	-2.01343	-2.05846	-2.10382	-2.0699	-1.96769	-1.51455	-1.87079
PCNA	AZD7762	-0.540514	0.00865021	Subgroup2	-0.368956	1.99e-21	1.20137	3.19e-159	-0.543137	1.92e-32	1022	AZD-7762, AZD 7762	Cell cycle	CHEK1, CHEK2	11152667	-1.88239	-1.79137	-1.98755	-1.53374	-1.92073	-2.07472	-1.69014	-1.94818	-1.75612	-2.20304	-1.83124	-1.62537	-2.0507	-1.6362	-2.01343	-2.05846	-2.10382	-2.0699	-1.96769	-1.51455	-1.87079
PCNA	MK-1775	-0.585968	0.00390359	Subgroup2	-0.368956	1.99e-21	1.20137	3.19e-159	-0.543137	1.92e-32	1179	AZD1775	Cell cycle	WEE1, PLK1	24856436	-1.88239	-1.79137	-1.98755	-1.53374	-1.92073	-2.07472	-1.69014	-1.94818	-1.75612	-2.20304	-1.83124	-1.62537	-2.0507	-1.6362	-2.01343	-2.05846	-2.10382	-2.0699	-1.96769	-1.51455	-1.87079
PCNA	MK-8776	-0.585968	0.00390359	Subgroup2	-0.368956	1.99e-21	1.20137	3.19e-159	-0.543137	1.92e-32	2046	SCH900776	Cell cycle	CHEK1, CHEK2, CDK2	16224745	-1.88239	-1.79137	-1.98755	-1.53374	-1.92073	-2.07472	-1.69014	-1.94818	-1.75612	-2.20304	-1.83124	-1.62537	-2.0507	-1.6362	-2.01343	-2.05846	-2.10382	-2.0699	-1.96769	-1.51455	-1.87079
PCNA	ABT737	-0.574111	0.00485254	Subgroup2	-0.368956	1.99e-21	1.20137	3.19e-159	-0.543137	1.92e-32	1910	-	Apoptosis regulation	BCL2, BCL-XL, BCL-W, BCL-B, BFL1	11228183	-1.88239	-1.79137	-1.98755	-1.53374	-1.92073	-2.07472	-1.69014	-1.94818	-1.75612	-2.20304	-1.83124	-1.62537	-2.0507	-1.6362	-2.01343	-2.05846	-2.10382	-2.0699	-1.96769	-1.51455	-1.87079
PKMYT1	VE821	-0.614286	0.00370231	Subgroup2	-0.434352	1.11e-25	1.31582	6.73e-168	-0.55192	3.49e-29	2111	VE 821, VE-821	Genome integrity	ATR	51000408	-1.04536	-1.19712	-1.2371	-0.876443	-1.12805	-1.14976	-1.23729	-0.739814	-0.709408	-0.426344	-1.2222	-0.864271	-0.791475	-1.32097	-1.06758	-1.47227	-1.34106	-1.28177	-0.881424	-1.05498	-0.907787
PKMYT1	Dactolisib	-0.545455	0.00797191	Subgroup2	-0.434352	1.11e-25	1.31582	6.73e-168	-0.55192	3.49e-29	1057	NVP-BEZ235, BEZ235	PI3K/MTOR signaling	PI3K (class 1), MTORC1, MTORC2	11977753	-1.04536	-1.19712	-1.2371	-0.876443	-1.12805	-1.14976	-1.23729	-0.739814	-0.709408	-0.426344	-1.2222	-0.864271	-0.791475	-1.32097	-1.06758	-1.47227	-1.34106	-1.28177	-0.881424	-1.05498	-0.907787
PKMYT1	AZD6738	-0.690711	0.000377832	Subgroup2	-0.434352	1.11e-25	1.31582	6.73e-168	-0.55192	3.49e-29	1917	AZD 6738, AZD-6738	Genome integrity	ATR	54761306	-1.04536	-1.19712	-1.2371	-0.876443	-1.12805	-1.14976	-1.23729	-0.739814	-0.709408	-0.426344	-1.2222	-0.864271	-0.791475	-1.32097	-1.06758	-1.47227	-1.34106	-1.28177	-0.881424	-1.05498	-0.907787
PKMYT1	PCI-34051	-0.650877	0.00322172	Subgroup2	-0.434352	1.11e-25	1.31582	6.73e-168	-0.55192	3.49e-29	1621	AK298746	Chromatin histone acetylation	HDAC8, HDAC6, HDAC1	24753719	-1.04536	-1.19712	-1.2371	-0.876443	-1.12805	-1.14976	-1.23729	-0.739814	-0.709408	-0.426344	-1.2222	-0.864271	-0.791475	-1.32097	-1.06758	-1.47227	-1.34106	-1.28177	-0.881424	-1.05498	-0.907787
PKMYT1	MK-8776	-0.578063	0.00451679	Subgroup2	-0.434352	1.11e-25	1.31582	6.73e-168	-0.55192	3.49e-29	2046	SCH900776	Cell cycle	CHEK1, CHEK2, CDK2	16224745	-1.04536	-1.19712	-1.2371	-0.876443	-1.12805	-1.14976	-1.23729	-0.739814	-0.709408	-0.426344	-1.2222	-0.864271	-0.791475	-1.32097	-1.06758	-1.47227	-1.34106	-1.28177	-0.881424	-1.05498	-0.907787
PKMYT1	MK-1775	-0.650198	0.00103404	Subgroup2	-0.434352	1.11e-25	1.31582	6.73e-168	-0.55192	3.49e-29	1179	AZD1775	Cell cycle	WEE1, PLK1	24856436	-1.04536	-1.19712	-1.2371	-0.876443	-1.12805	-1.14976	-1.23729	-0.739814	-0.709408	-0.426344	-1.2222	-0.864271	-0.791475	-1.32097	-1.06758	-1.47227	-1.34106	-1.28177	-0.881424	-1.05498	-0.907787
PKMYT1	AZD7762	-0.629447	0.00163795	Subgroup2	-0.434352	1.11e-25	1.31582	6.73e-168	-0.55192	3.49e-29	1022	AZD-7762, AZD 7762	Cell cycle	CHEK1, CHEK2	11152667	-1.04536	-1.19712	-1.2371	-0.876443	-1.12805	-1.14976	-1.23729	-0.739814	-0.709408	-0.426344	-1.2222	-0.864271	-0.791475	-1.32097	-1.06758	-1.47227	-1.34106	-1.28177	-0.881424	-1.05498	-0.907787
PLK1	Tamoxifen	-0.541502	0.00851083	Subgroup2	-0.551731	2.52e-40	1.44227	5.27e-206	-0.497549	2.78e-23	1199	Nolvadex, Soltamox, Zynoplex, ICI-46474, Kessar	Hormone-related	ESR1	2733526	-1.74727	-1.86941	-1.77857	-1.57716	-1.91966	-1.90342	-1.65305	-1.85673	-1.67613	-2.04601	-1.6325	-1.64961	-1.95315	-1.45421	-1.87335	-1.73923	-1.92128	-1.9862	-1.72167	-1.20598	-1.52804
PLK1	MK-1775	-0.541502	0.00851083	Subgroup2	-0.551731	2.52e-40	1.44227	5.27e-206	-0.497549	2.78e-23	1179	AZD1775	Cell cycle	WEE1, PLK1	24856436	-1.74727	-1.86941	-1.77857	-1.57716	-1.91966	-1.90342	-1.65305	-1.85673	-1.67613	-2.04601	-1.6325	-1.64961	-1.95315	-1.45421	-1.87335	-1.73923	-1.92128	-1.9862	-1.72167	-1.20598	-1.52804
PLK4	ABT737	-0.58004	0.00435638	Subgroup2	-0.353703	2.71e-22	1.20422	1.46e-187	-0.567328	3.53e-40	1910	-	Apoptosis regulation	BCL2, BCL-XL, BCL-W, BCL-B, BFL1	11228183	-1.15167	-1.30655	-1.10486	-1.10744	-1.18783	-1.08127	-0.923392	-1.41659	-1.20728	-1.46731	-1.32705	-0.902587	-1.06505	-1.11123	-1.08017	-1.13586	-0.81691	-1.21221	-1.2861	-1.18424	-1.10935
PLK4	Navitoclax	-0.592208	0.00549177	Subgroup2	-0.353703	2.71e-22	1.20422	1.46e-187	-0.567328	3.53e-40	1011	ABT-263, ABT263, ABT 263	Apoptosis regulation	BCL2, BCL-XL, BCL-W	24978538	-1.15167	-1.30655	-1.10486	-1.10744	-1.18783	-1.08127	-0.923392	-1.41659	-1.20728	-1.46731	-1.32705	-0.902587	-1.06505	-1.11123	-1.08017	-1.13586	-0.81691	-1.21221	-1.2861	-1.18424	-1.10935
POLD1	Docetaxel	-0.567194	0.00549057	Subgroup2	-0.442217	1.87e-38	1.07532	2.42e-161	-0.327141	2.62e-15	1007	RP-56976, Taxotere	Mitosis	Microtubule stabiliser	148124	-1.30381	-1.18622	-1.30659	-1.31047	-1.64699	-1.08511	-1.20221	-1.46876	-1.15832	-1.2092	-1.45068	-1.34185	-1.25003	-1.07848	-1.40349	-1.27915	-1.83245	-1.30443	-1.18745	-1.11336	-1.26097
POLD1	Entinostat	-0.687719	0.00154617	Subgroup2	-0.442217	1.87e-38	1.07532	2.42e-161	-0.327141	2.62e-15	1593	MS-275	Chromatin histone acetylation	HDAC1, HDAC3	4261	-1.30381	-1.18622	-1.30659	-1.31047	-1.64699	-1.08511	-1.20221	-1.46876	-1.15832	-1.2092	-1.45068	-1.34185	-1.25003	-1.07848	-1.40349	-1.27915	-1.83245	-1.30443	-1.18745	-1.11336	-1.26097
POLD1	AZD6738	-0.600791	0.00294145	Subgroup2	-0.442217	1.87e-38	1.07532	2.42e-161	-0.327141	2.62e-15	1917	AZD 6738, AZD-6738	Genome integrity	ATR	54761306	-1.30381	-1.18622	-1.30659	-1.31047	-1.64699	-1.08511	-1.20221	-1.46876	-1.15832	-1.2092	-1.45068	-1.34185	-1.25003	-1.07848	-1.40349	-1.27915	-1.83245	-1.30443	-1.18745	-1.11336	-1.26097
POLD1	Staurosporine	-0.576087	0.00468214	Subgroup2	-0.442217	1.87e-38	1.07532	2.42e-161	-0.327141	2.62e-15	1034	-	RTK signaling	Broad spectrum kinase inhibitor	several	-1.30381	-1.18622	-1.30659	-1.31047	-1.64699	-1.08511	-1.20221	-1.46876	-1.15832	-1.2092	-1.45068	-1.34185	-1.25003	-1.07848	-1.40349	-1.27915	-1.83245	-1.30443	-1.18745	-1.11336	-1.26097
POLD1	AZD7762	-0.755929	4.71e-05	Subgroup2	-0.442217	1.87e-38	1.07532	2.42e-161	-0.327141	2.62e-15	1022	AZD-7762, AZD 7762	Cell cycle	CHEK1, CHEK2	11152667	-1.30381	-1.18622	-1.30659	-1.31047	-1.64699	-1.08511	-1.20221	-1.46876	-1.15832	-1.2092	-1.45068	-1.34185	-1.25003	-1.07848	-1.40349	-1.27915	-1.83245	-1.30443	-1.18745	-1.11336	-1.26097
POLD1	VE821	-0.614286	0.00370231	Subgroup2	-0.442217	1.87e-38	1.07532	2.42e-161	-0.327141	2.62e-15	2111	VE 821, VE-821	Genome integrity	ATR	51000408	-1.30381	-1.18622	-1.30659	-1.31047	-1.64699	-1.08511	-1.20221	-1.46876	-1.15832	-1.2092	-1.45068	-1.34185	-1.25003	-1.07848	-1.40349	-1.27915	-1.83245	-1.30443	-1.18745	-1.11336	-1.26097
POLD1	Acetalax	0.670175	0.00222081	Subgroup2	-0.442217	1.87e-38	1.07532	2.42e-161	-0.327141	2.62e-15	1804	Oxyphenisatin acetate	Unclassified	-	-	-1.30381	-1.18622	-1.30659	-1.31047	-1.64699	-1.08511	-1.20221	-1.46876	-1.15832	-1.2092	-1.45068	-1.34185	-1.25003	-1.07848	-1.40349	-1.27915	-1.83245	-1.30443	-1.18745	-1.11336	-1.26097
POLD1	Docetaxel	-0.567194	0.00549057	Subgroup2	-0.442217	1.87e-38	1.07532	2.42e-161	-0.327141	2.62e-15	1819	RP-56976, Taxotere	Mitosis	Microtubule stabiliser	-	-1.30381	-1.18622	-1.30659	-1.31047	-1.64699	-1.08511	-1.20221	-1.46876	-1.15832	-1.2092	-1.45068	-1.34185	-1.25003	-1.07848	-1.40349	-1.27915	-1.83245	-1.30443	-1.18745	-1.11336	-1.26097
POLD1	MIRA-1	0.571146	0.0051179	Subgroup2	-0.442217	1.87e-38	1.07532	2.42e-161	-0.327141	2.62e-15	1931	MIRA 1, MIRA1, NSC19630, NSC-19630, NSC 19630	p53 pathway	TP53	227681	-1.30381	-1.18622	-1.30659	-1.31047	-1.64699	-1.08511	-1.20221	-1.46876	-1.15832	-1.2092	-1.45068	-1.34185	-1.25003	-1.07848	-1.40349	-1.27915	-1.83245	-1.30443	-1.18745	-1.11336	-1.26097
POLD1	Vorinostat	-0.544466	0.00810389	Subgroup2	-0.442217	1.87e-38	1.07532	2.42e-161	-0.327141	2.62e-15	1012	Zolinza, SAHA, suberanilohydroxamic acid, suberoylanilide hydroxamic acid, MK-0683	Chromatin histone acetylation	HDAC inhibitor Class I, IIa, IIb, IV	5311	-1.30381	-1.18622	-1.30659	-1.31047	-1.64699	-1.08511	-1.20221	-1.46876	-1.15832	-1.2092	-1.45068	-1.34185	-1.25003	-1.07848	-1.40349	-1.27915	-1.83245	-1.30443	-1.18745	-1.11336	-1.26097
POLD1	MK-1775	-0.748024	6.33e-05	Subgroup2	-0.442217	1.87e-38	1.07532	2.42e-161	-0.327141	2.62e-15	1179	AZD1775	Cell cycle	WEE1, PLK1	24856436	-1.30381	-1.18622	-1.30659	-1.31047	-1.64699	-1.08511	-1.20221	-1.46876	-1.15832	-1.2092	-1.45068	-1.34185	-1.25003	-1.07848	-1.40349	-1.27915	-1.83245	-1.30443	-1.18745	-1.11336	-1.26097
POLD1	MK-8776	-0.63834	0.00135031	Subgroup2	-0.442217	1.87e-38	1.07532	2.42e-161	-0.327141	2.62e-15	2046	SCH900776	Cell cycle	CHEK1, CHEK2, CDK2	16224745	-1.30381	-1.18622	-1.30659	-1.31047	-1.64699	-1.08511	-1.20221	-1.46876	-1.15832	-1.2092	-1.45068	-1.34185	-1.25003	-1.07848	-1.40349	-1.27915	-1.83245	-1.30443	-1.18745	-1.11336	-1.26097
POLE2	MK-1775	-0.550395	0.0073386	Subgroup2	-0.439217	2.17e-29	1.29319	6.13e-186	-0.524913	1.28e-29	1179	AZD1775	Cell cycle	WEE1, PLK1	24856436	-1.66	-1.80324	-1.57642	-1.49231	-2.12639	-1.57574	-1.77508	-1.77868	-1.52672	-1.25761	-1.56057	-1.43589	-1.87175	-1.70395	-1.65079	-1.87402	-2.08996	-1.45245	-1.70038	-1.32597	-1.62217
POLE2	AZD7762	-0.554348	0.00686275	Subgroup2	-0.439217	2.17e-29	1.29319	6.13e-186	-0.524913	1.28e-29	1022	AZD-7762, AZD 7762	Cell cycle	CHEK1, CHEK2	11152667	-1.66	-1.80324	-1.57642	-1.49231	-2.12639	-1.57574	-1.77508	-1.77868	-1.52672	-1.25761	-1.56057	-1.43589	-1.87175	-1.70395	-1.65079	-1.87402	-2.08996	-1.45245	-1.70038	-1.32597	-1.62217
POLE2	MIM1	-0.541502	0.00851083	Subgroup2	-0.439217	2.17e-29	1.29319	6.13e-186	-0.524913	1.28e-29	1996	MIM 1, MIM-1	Apoptosis regulation	MCL1	16241412	-1.66	-1.80324	-1.57642	-1.49231	-2.12639	-1.57574	-1.77508	-1.77868	-1.52672	-1.25761	-1.56057	-1.43589	-1.87175	-1.70395	-1.65079	-1.87402	-2.08996	-1.45245	-1.70038	-1.32597	-1.62217
PRC1	MK-8776	-0.623518	0.00185714	Subgroup2	-0.135301	0.00611358	1.2386	5.04e-104	-0.908008	2.25e-60	2046	SCH900776	Cell cycle	CHEK1, CHEK2, CDK2	16224745	-1.45595	-1.45001	-1.3715	-1.44092	-2.04569	-1.24466	-1.40097	-1.51964	-1.37275	-1.40473	-1.32968	-1.27654	-1.39423	-1.39801	-1.4654	-1.53513	-1.92192	-1.3176	-1.58786	-1.47316	-1.16867
PRC1	Vorinostat	-0.564229	0.00578478	Subgroup2	-0.135301	0.00611358	1.2386	5.04e-104	-0.908008	2.25e-60	1012	Zolinza, SAHA, suberanilohydroxamic acid, suberoylanilide hydroxamic acid, MK-0683	Chromatin histone acetylation	HDAC inhibitor Class I, IIa, IIb, IV	5311	-1.45595	-1.45001	-1.3715	-1.44092	-2.04569	-1.24466	-1.40097	-1.51964	-1.37275	-1.40473	-1.32968	-1.27654	-1.39423	-1.39801	-1.4654	-1.53513	-1.92192	-1.3176	-1.58786	-1.47316	-1.16867
PRC1	AZD7762	-0.732213	0.000109701	Subgroup2	-0.135301	0.00611358	1.2386	5.04e-104	-0.908008	2.25e-60	1022	AZD-7762, AZD 7762	Cell cycle	CHEK1, CHEK2	11152667	-1.45595	-1.45001	-1.3715	-1.44092	-2.04569	-1.24466	-1.40097	-1.51964	-1.37275	-1.40473	-1.32968	-1.27654	-1.39423	-1.39801	-1.4654	-1.53513	-1.92192	-1.3176	-1.58786	-1.47316	-1.16867
PRC1	MK-1775	-0.705534	0.000249975	Subgroup2	-0.135301	0.00611358	1.2386	5.04e-104	-0.908008	2.25e-60	1179	AZD1775	Cell cycle	WEE1, PLK1	24856436	-1.45595	-1.45001	-1.3715	-1.44092	-2.04569	-1.24466	-1.40097	-1.51964	-1.37275	-1.40473	-1.32968	-1.27654	-1.39423	-1.39801	-1.4654	-1.53513	-1.92192	-1.3176	-1.58786	-1.47316	-1.16867
PRC1	Dihydrorotenone	0.598246	0.00794093	Subgroup2	-0.135301	0.00611358	1.2386	5.04e-104	-0.908008	2.25e-60	1827	-	Unclassified	-	-	-1.45595	-1.45001	-1.3715	-1.44092	-2.04569	-1.24466	-1.40097	-1.51964	-1.37275	-1.40473	-1.32968	-1.27654	-1.39423	-1.39801	-1.4654	-1.53513	-1.92192	-1.3176	-1.58786	-1.47316	-1.16867
PRC1	Entinostat	-0.624561	0.00515281	Subgroup2	-0.135301	0.00611358	1.2386	5.04e-104	-0.908008	2.25e-60	1593	MS-275	Chromatin histone acetylation	HDAC1, HDAC3	4261	-1.45595	-1.45001	-1.3715	-1.44092	-2.04569	-1.24466	-1.40097	-1.51964	-1.37275	-1.40473	-1.32968	-1.27654	-1.39423	-1.39801	-1.4654	-1.53513	-1.92192	-1.3176	-1.58786	-1.47316	-1.16867
PRC1	AZD6738	-0.750988	5.68e-05	Subgroup2	-0.135301	0.00611358	1.2386	5.04e-104	-0.908008	2.25e-60	1917	AZD 6738, AZD-6738	Genome integrity	ATR	54761306	-1.45595	-1.45001	-1.3715	-1.44092	-2.04569	-1.24466	-1.40097	-1.51964	-1.37275	-1.40473	-1.32968	-1.27654	-1.39423	-1.39801	-1.4654	-1.53513	-1.92192	-1.3176	-1.58786	-1.47316	-1.16867
PRIM1	MK-1775	-0.601779	0.00288516	Subgroup2	0.0379345	0.288668	0.819537	7.53e-90	-0.781795	9.11e-93	1179	AZD1775	Cell cycle	WEE1, PLK1	24856436	-1.4493	-1.68923	-1.4935	-1.23369	-2.13306	-1.352	-1.30665	-1.76168	-1.36549	-1.19637	-1.38714	-1.41605	-1.55683	-1.4355	-1.61091	-1.64706	-1.16172	-1.30794	-1.2808	-1.32322	-1.32718
PRIM1	WEHI-539	-0.56917	0.00530149	Subgroup2	0.0379345	0.288668	0.819537	7.53e-90	-0.781795	9.11e-93	1997	WEHI539, WEHI-539	Apoptosis regulation	BCL-XL	71297207	-1.4493	-1.68923	-1.4935	-1.23369	-2.13306	-1.352	-1.30665	-1.76168	-1.36549	-1.19637	-1.38714	-1.41605	-1.55683	-1.4355	-1.61091	-1.64706	-1.16172	-1.30794	-1.2808	-1.32322	-1.32718
PRIM1	Pevonedistat	-0.561265	0.0060921	Subgroup2	0.0379345	0.288668	0.819537	7.53e-90	-0.781795	9.11e-93	1529	MLN4924, MLN 4924, MLN-4924	Other	NAE	16720766	-1.4493	-1.68923	-1.4935	-1.23369	-2.13306	-1.352	-1.30665	-1.76168	-1.36549	-1.19637	-1.38714	-1.41605	-1.55683	-1.4355	-1.61091	-1.64706	-1.16172	-1.30794	-1.2808	-1.32322	-1.32718
PRIM1	Cisplatin	-0.560277	0.00619754	Subgroup2	0.0379345	0.288668	0.819537	7.53e-90	-0.781795	9.11e-93	1005	cis-Diammineplatinum(II) dichloride, Platinol, CIS-DDP	DNA replication	DNA crosslinker	84691	-1.4493	-1.68923	-1.4935	-1.23369	-2.13306	-1.352	-1.30665	-1.76168	-1.36549	-1.19637	-1.38714	-1.41605	-1.55683	-1.4355	-1.61091	-1.64706	-1.16172	-1.30794	-1.2808	-1.32322	-1.32718
PRIM1	Vorinostat	-0.676877	0.000542718	Subgroup2	0.0379345	0.288668	0.819537	7.53e-90	-0.781795	9.11e-93	1012	Zolinza, SAHA, suberanilohydroxamic acid, suberoylanilide hydroxamic acid, MK-0683	Chromatin histone acetylation	HDAC inhibitor Class I, IIa, IIb, IV	5311	-1.4493	-1.68923	-1.4935	-1.23369	-2.13306	-1.352	-1.30665	-1.76168	-1.36549	-1.19637	-1.38714	-1.41605	-1.55683	-1.4355	-1.61091	-1.64706	-1.16172	-1.30794	-1.2808	-1.32322	-1.32718
PRMT5	AZD5438	-0.726316	0.000629407	Subgroup2	-0.335526	7.61e-41	0.622949	5.99e-92	-0.0768443	0.0143302	1401	SN1057898678	Cell cycle	CDK2	-	-1.27598	-1.59219	-1.29198	-1.16123	-0.850307	-1.28194	-1.23879	-0.807745	-1.34116	-1.06163	-1.48678	-1.18238	-1.14494	-1.20795	-1.07512	-1.56224	-1.74673	-1.08265	-1.20781	-1.66587	-1.5301
PRMT5	EPZ004777	0.570158	0.00520901	Subgroup2	-0.335526	7.61e-41	0.622949	5.99e-92	-0.0768443	0.0143302	1237	EPZ-004777	Chromatin histone methylation	DOT1L	56962336	-1.27598	-1.59219	-1.29198	-1.16123	-0.850307	-1.28194	-1.23879	-0.807745	-1.34116	-1.06163	-1.48678	-1.18238	-1.14494	-1.20795	-1.07512	-1.56224	-1.74673	-1.08265	-1.20781	-1.66587	-1.5301
PRMT5	Afuresertib	0.559289	0.00630449	Subgroup2	-0.335526	7.61e-41	0.622949	5.99e-92	-0.0768443	0.0143302	1912	GSK2110183, GSK2110183C	PI3K/MTOR signaling	AKT1, AKT2, AKT3	46843057	-1.27598	-1.59219	-1.29198	-1.16123	-0.850307	-1.28194	-1.23879	-0.807745	-1.34116	-1.06163	-1.48678	-1.18238	-1.14494	-1.20795	-1.07512	-1.56224	-1.74673	-1.08265	-1.20781	-1.66587	-1.5301
PRMT5	CDK9_5576	-0.598246	0.00794093	Subgroup2	-0.335526	7.61e-41	0.622949	5.99e-92	-0.0768443	0.0143302	1708	SN1047226266, CDK9_5576	Cell cycle	CDK9	-	-1.27598	-1.59219	-1.29198	-1.16123	-0.850307	-1.28194	-1.23879	-0.807745	-1.34116	-1.06163	-1.48678	-1.18238	-1.14494	-1.20795	-1.07512	-1.56224	-1.74673	-1.08265	-1.20781	-1.66587	-1.5301
RACGAP1	Entinostat	-0.629825	0.00470573	Subgroup2	-0.165051	4.19e-05	1.06888	7.69e-116	-0.715016	5.91e-55	1593	MS-275	Chromatin histone acetylation	HDAC1, HDAC3	4261	-1.48805	-1.58437	-1.21066	-1.4081	-2.01731	-1.44279	-1.38072	-1.84785	-1.48036	-1.39435	-1.44796	-1.44652	-1.59259	-1.43771	-1.27977	-1.76924	-1.58657	-1.41466	-1.35264	-1.38292	-1.28389
RACGAP1	Wee1 Inhibitor	-0.681818	0.000478019	Subgroup2	-0.165051	4.19e-05	1.06888	7.69e-116	-0.715016	5.91e-55	1046	681640, Wee1 Inhibitor	Cell cycle	WEE1, CHEK1	10384072	-1.48805	-1.58437	-1.21066	-1.4081	-2.01731	-1.44279	-1.38072	-1.84785	-1.48036	-1.39435	-1.44796	-1.44652	-1.59259	-1.43771	-1.27977	-1.76924	-1.58657	-1.41466	-1.35264	-1.38292	-1.28389
RACGAP1	MK-1775	-0.555336	0.00674791	Subgroup2	-0.165051	4.19e-05	1.06888	7.69e-116	-0.715016	5.91e-55	1179	AZD1775	Cell cycle	WEE1, PLK1	24856436	-1.48805	-1.58437	-1.21066	-1.4081	-2.01731	-1.44279	-1.38072	-1.84785	-1.48036	-1.39435	-1.44796	-1.44652	-1.59259	-1.43771	-1.27977	-1.76924	-1.58657	-1.41466	-1.35264	-1.38292	-1.28389
RAD51	AZD7762	-0.576087	0.00468214	Subgroup2	-0.588173	1.56e-27	1.72174	1.94e-168	-0.694032	4.64e-27	1022	AZD-7762, AZD 7762	Cell cycle	CHEK1, CHEK2	11152667	-1.04159	-0.848705	-0.889601	-1.11352	-1.33313	-0.839085	-1.03679	-1.11942	-0.951201	-0.756941	-0.871612	-1.02161	-1.11769	-0.843136	-0.94873	-1.18113	-1.9373	-0.838715	-1.06971	-1.00482	-1.1089
RAD51C	AZD7762	-0.597826	0.0031159	Subgroup2	-0.454349	2.4e-47	1.13314	4.92e-224	-0.361271	2.91e-21	1022	AZD-7762, AZD 7762	Cell cycle	CHEK1, CHEK2	11152667	-0.716583	-0.620136	-0.634653	-0.307792	-1.23053	-0.555881	-0.589613	-0.767371	-0.816586	-0.728918	-0.621715	-0.737399	-0.645834	-0.65803	-0.495571	-0.387815	-0.645114	-1.47841	-1.15557	-0.561153	-0.693567
RAD51C	VSP34_8731	-0.642105	0.00378473	Subgroup2	-0.454349	2.4e-47	1.13314	4.92e-224	-0.361271	2.91e-21	1734	SN1049998399, VSP34_8731	Other	VSP34	-	-0.716583	-0.620136	-0.634653	-0.307792	-1.23053	-0.555881	-0.589613	-0.767371	-0.816586	-0.728918	-0.621715	-0.737399	-0.645834	-0.65803	-0.495571	-0.387815	-0.645114	-1.47841	-1.15557	-0.561153	-0.693567
RAN	Navitoclax	-0.651948	0.00176691	Subgroup2	-0.163132	1.55e-11	0.594161	1.09e-94	-0.296085	2.08e-25	1011	ABT-263, ABT263, ABT 263	Apoptosis regulation	BCL2, BCL-XL, BCL-W	24978538	-2.35702	-2.45044	-2.43996	-2.2809	-2.44129	-2.68737	-2.2736	-2.4003	-2.02767	-2.42337	-2.31697	-2.45799	-2.14416	-2.22038	-2.19985	-2.63808	-2.28449	-2.73284	-2.16851	-2.26641	-2.28576
RAN	Gallibiscoquinazole	0.605263	0.00709942	Subgroup2	-0.163132	1.55e-11	0.594161	1.09e-94	-0.296085	2.08e-25	1830	-	Unclassified	-	-	-2.35702	-2.45044	-2.43996	-2.2809	-2.44129	-2.68737	-2.2736	-2.4003	-2.02767	-2.42337	-2.31697	-2.45799	-2.14416	-2.22038	-2.19985	-2.63808	-2.28449	-2.73284	-2.16851	-2.26641	-2.28576
RBBP8	MK-2206	-0.562253	0.00598818	Subgroup2	-0.196894	2.16e-10	0.679049	8.82e-74	-0.32354	9.3e-19	1053	MK 2206, MK2206	PI3K/MTOR signaling	AKT1, AKT2	46930998	-1.1061	-1.13613	-1.11485	-1.1394	-1.43129	-1.02524	-0.853449	-1.41221	-1.1961	-0.812376	-0.908327	-1.03313	-0.948468	-1.2245	-1.32527	-1.06994	-1.23072	-1.17545	-1.06688	-1.12834	-0.889983
RBBP8	WEHI-539	-0.738142	8.98e-05	Subgroup2	-0.196894	2.16e-10	0.679049	8.82e-74	-0.32354	9.3e-19	1997	WEHI539, WEHI-539	Apoptosis regulation	BCL-XL	71297207	-1.1061	-1.13613	-1.11485	-1.1394	-1.43129	-1.02524	-0.853449	-1.41221	-1.1961	-0.812376	-0.908327	-1.03313	-0.948468	-1.2245	-1.32527	-1.06994	-1.23072	-1.17545	-1.06688	-1.12834	-0.889983
RBBP8	PCI-34051	-0.763158	0.000219354	Subgroup2	-0.196894	2.16e-10	0.679049	8.82e-74	-0.32354	9.3e-19	1621	AK298746	Chromatin histone acetylation	HDAC8, HDAC6, HDAC1	24753719	-1.1061	-1.13613	-1.11485	-1.1394	-1.43129	-1.02524	-0.853449	-1.41221	-1.1961	-0.812376	-0.908327	-1.03313	-0.948468	-1.2245	-1.32527	-1.06994	-1.23072	-1.17545	-1.06688	-1.12834	-0.889983
RBBP8	Navitoclax	-0.806494	1.09e-05	Subgroup2	-0.196894	2.16e-10	0.679049	8.82e-74	-0.32354	9.3e-19	1011	ABT-263, ABT263, ABT 263	Apoptosis regulation	BCL2, BCL-XL, BCL-W	24978538	-1.1061	-1.13613	-1.11485	-1.1394	-1.43129	-1.02524	-0.853449	-1.41221	-1.1961	-0.812376	-0.908327	-1.03313	-0.948468	-1.2245	-1.32527	-1.06994	-1.23072	-1.17545	-1.06688	-1.12834	-0.889983
RBBP8	PRT062607	-0.612281	0.00633216	Subgroup2	-0.196894	2.16e-10	0.679049	8.82e-74	-0.32354	9.3e-19	1631	P505-15, PRT-2607, BIIB-057	Other, kinases	SYK	44462758	-1.1061	-1.13613	-1.11485	-1.1394	-1.43129	-1.02524	-0.853449	-1.41221	-1.1961	-0.812376	-0.908327	-1.03313	-0.948468	-1.2245	-1.32527	-1.06994	-1.23072	-1.17545	-1.06688	-1.12834	-0.889983
RBBP8	ABT737	-0.822134	2.29e-06	Subgroup2	-0.196894	2.16e-10	0.679049	8.82e-74	-0.32354	9.3e-19	1910	-	Apoptosis regulation	BCL2, BCL-XL, BCL-W, BCL-B, BFL1	11228183	-1.1061	-1.13613	-1.11485	-1.1394	-1.43129	-1.02524	-0.853449	-1.41221	-1.1961	-0.812376	-0.908327	-1.03313	-0.948468	-1.2245	-1.32527	-1.06994	-1.23072	-1.17545	-1.06688	-1.12834	-0.889983
RBM28	CDK9_5576	-0.652632	0.0031178	Subgroup2	-0.441202	2.92e-76	0.62898	2.11e-99	0.0678665	0.0269888	1708	SN1047226266, CDK9_5576	Cell cycle	CDK9	-	-1.11339	-1.01314	-1.14706	-0.997884	-1.06779	-0.838962	-0.893835	-1.26124	-1.08904	-1.31864	-0.979537	-0.980812	-0.854375	-1.40033	-1.5227	-1.10874	-1.51762	-0.870303	-1.18186	-1.17012	-1.05385
RBM28	Sinularin	-0.735088	0.000500396	Subgroup2	-0.441202	2.92e-76	0.62898	2.11e-99	0.0678665	0.0269888	1838	-	Unclassified	-	-	-1.11339	-1.01314	-1.14706	-0.997884	-1.06779	-0.838962	-0.893835	-1.26124	-1.08904	-1.31864	-0.979537	-0.980812	-0.854375	-1.40033	-1.5227	-1.10874	-1.51762	-0.870303	-1.18186	-1.17012	-1.05385
RBM28	WZ4003	-0.594737	0.00839121	Subgroup2	-0.441202	2.92e-76	0.62898	2.11e-99	0.0678665	0.0269888	1614	WZ 4003	Other, kinases	NUAK1, NUAK2	72200024	-1.11339	-1.01314	-1.14706	-0.997884	-1.06779	-0.838962	-0.893835	-1.26124	-1.08904	-1.31864	-0.979537	-0.980812	-0.854375	-1.40033	-1.5227	-1.10874	-1.51762	-0.870303	-1.18186	-1.17012	-1.05385
RBM28	Dinaciclib	-0.678947	0.00185874	Subgroup2	-0.441202	2.92e-76	0.62898	2.11e-99	0.0678665	0.0269888	1180	SCH727965, SCH 727965, SCH-727-965, MK-7965	Cell cycle	CDK1, CDK2, CDK5, CDK9	46926350	-1.11339	-1.01314	-1.14706	-0.997884	-1.06779	-0.838962	-0.893835	-1.26124	-1.08904	-1.31864	-0.979537	-0.980812	-0.854375	-1.40033	-1.5227	-1.10874	-1.51762	-0.870303	-1.18186	-1.17012	-1.05385
RBM28	VSP34_8731	-0.638596	0.00403132	Subgroup2	-0.441202	2.92e-76	0.62898	2.11e-99	0.0678665	0.0269888	1734	SN1049998399, VSP34_8731	Other	VSP34	-	-1.11339	-1.01314	-1.14706	-0.997884	-1.06779	-0.838962	-0.893835	-1.26124	-1.08904	-1.31864	-0.979537	-0.980812	-0.854375	-1.40033	-1.5227	-1.10874	-1.51762	-0.870303	-1.18186	-1.17012	-1.05385
RBM28	Fludarabine	0.592982	0.00862403	Subgroup2	-0.441202	2.92e-76	0.62898	2.11e-99	0.0678665	0.0269888	1813	Fludara	Unclassified	-	-	-1.11339	-1.01314	-1.14706	-0.997884	-1.06779	-0.838962	-0.893835	-1.26124	-1.08904	-1.31864	-0.979537	-0.980812	-0.854375	-1.40033	-1.5227	-1.10874	-1.51762	-0.870303	-1.18186	-1.17012	-1.05385
RBM28	EPZ004777	0.556324	0.00663468	Subgroup2	-0.441202	2.92e-76	0.62898	2.11e-99	0.0678665	0.0269888	1237	EPZ-004777	Chromatin histone methylation	DOT1L	56962336	-1.11339	-1.01314	-1.14706	-0.997884	-1.06779	-0.838962	-0.893835	-1.26124	-1.08904	-1.31864	-0.979537	-0.980812	-0.854375	-1.40033	-1.5227	-1.10874	-1.51762	-0.870303	-1.18186	-1.17012	-1.05385
RBM28	CDK9_5038	-0.694737	0.00132804	Subgroup2	-0.441202	2.92e-76	0.62898	2.11e-99	0.0678665	0.0269888	1709	SN1047483750, CDK9_5038	Cell cycle	CDK9	-	-1.11339	-1.01314	-1.14706	-0.997884	-1.06779	-0.838962	-0.893835	-1.26124	-1.08904	-1.31864	-0.979537	-0.980812	-0.854375	-1.40033	-1.5227	-1.10874	-1.51762	-0.870303	-1.18186	-1.17012	-1.05385
RBM28	AZD5438	-0.768421	0.000184191	Subgroup2	-0.441202	2.92e-76	0.62898	2.11e-99	0.0678665	0.0269888	1401	SN1057898678	Cell cycle	CDK2	-	-1.11339	-1.01314	-1.14706	-0.997884	-1.06779	-0.838962	-0.893835	-1.26124	-1.08904	-1.31864	-0.979537	-0.980812	-0.854375	-1.40033	-1.5227	-1.10874	-1.51762	-0.870303	-1.18186	-1.17012	-1.05385
RBM28	GSK1904529A	-0.702569	0.00027212	Subgroup2	-0.441202	2.92e-76	0.62898	2.11e-99	0.0678665	0.0269888	1093	GSK-1904529A, GSK 1904529A	IGF1R signaling	IGF1R, IR	25124816	-1.11339	-1.01314	-1.14706	-0.997884	-1.06779	-0.838962	-0.893835	-1.26124	-1.08904	-1.31864	-0.979537	-0.980812	-0.854375	-1.40033	-1.5227	-1.10874	-1.51762	-0.870303	-1.18186	-1.17012	-1.05385
RBM28	AMG-319	0.624506	0.00181898	Subgroup2	-0.441202	2.92e-76	0.62898	2.11e-99	0.0678665	0.0269888	2045	AMG319	PI3K/MTOR signaling	PI3K (beta sparing)	68947304	-1.11339	-1.01314	-1.14706	-0.997884	-1.06779	-0.838962	-0.893835	-1.26124	-1.08904	-1.31864	-0.979537	-0.980812	-0.854375	-1.40033	-1.5227	-1.10874	-1.51762	-0.870303	-1.18186	-1.17012	-1.05385
RFC3	AZD7762	-0.568182	0.00539533	Subgroup2	-0.122758	0.000252245	0.96174	6.44e-140	-0.679909	3.07e-73	1022	AZD-7762, AZD 7762	Cell cycle	CHEK1, CHEK2	11152667	-1.68606	-1.74853	-1.71403	-1.56835	-2.10298	-1.65187	-1.59273	-1.91983	-1.64942	-1.98281	-1.80921	-1.68697	-1.40799	-1.64891	-1.54772	-1.67799	-1.64199	-1.76736	-1.47745	-1.4934	-1.63169
RFC5	MK-8776	-0.548419	0.00758668	Subgroup2	-0.364361	2.03e-23	1.13233	4.84e-159	-0.488339	1.6e-29	2046	SCH900776	Cell cycle	CHEK1, CHEK2, CDK2	16224745	-1.10181	-1.11549	-1.18111	-1.18952	-1.67034	-1.00332	-0.895762	-1.09805	-1.09261	-1.00314	-1.13497	-0.906269	-0.98359	-1.07596	-0.898075	-1.03986	-1.04553	-1.37189	-1.08451	-1.27341	-0.972704
RFC5	AZD7762	-0.628458	0.00167288	Subgroup2	-0.364361	2.03e-23	1.13233	4.84e-159	-0.488339	1.6e-29	1022	AZD-7762, AZD 7762	Cell cycle	CHEK1, CHEK2	11152667	-1.10181	-1.11549	-1.18111	-1.18952	-1.67034	-1.00332	-0.895762	-1.09805	-1.09261	-1.00314	-1.13497	-0.906269	-0.98359	-1.07596	-0.898075	-1.03986	-1.04553	-1.37189	-1.08451	-1.27341	-0.972704
RFC5	Rapamycin	0.663636	0.00137649	Subgroup2	-0.364361	2.03e-23	1.13233	4.84e-159	-0.488339	1.6e-29	1084	AY-22989, Sirolimus, WY-090217, Torisel, Rapamune	PI3K/MTOR signaling	MTORC1	5384616	-1.10181	-1.11549	-1.18111	-1.18952	-1.67034	-1.00332	-0.895762	-1.09805	-1.09261	-1.00314	-1.13497	-0.906269	-0.98359	-1.07596	-0.898075	-1.03986	-1.04553	-1.37189	-1.08451	-1.27341	-0.972704
RPA3	Fulvestrant	-0.548419	0.00758668	Subgroup2	-0.354095	3.04e-33	0.703521	3.84e-85	-0.12204	0.000794146	1200	Faslodex, ICI-182780	Hormone-related	ESR	104741	-1.33637	-1.34565	-1.45281	-1.18965	-1.64392	-0.985019	-1.16267	-1.61001	-1.2482	-1.3281	-1.43599	-1.1923	-1.20951	-1.48533	-1.53136	-1.50974	-1.53222	-1.05217	-1.32168	-1.21695	-1.27421
RPA3	WZ4003	-0.589474	0.00910547	Subgroup2	-0.354095	3.04e-33	0.703521	3.84e-85	-0.12204	0.000794146	1614	WZ 4003	Other, kinases	NUAK1, NUAK2	72200024	-1.33637	-1.34565	-1.45281	-1.18965	-1.64392	-0.985019	-1.16267	-1.61001	-1.2482	-1.3281	-1.43599	-1.1923	-1.20951	-1.48533	-1.53136	-1.50974	-1.53222	-1.05217	-1.32168	-1.21695	-1.27421
RPA3	Fulvestrant	-0.548419	0.00758668	Subgroup2	-0.354095	3.04e-33	0.703521	3.84e-85	-0.12204	0.000794146	1816	-	Hormone-related	-	-	-1.33637	-1.34565	-1.45281	-1.18965	-1.64392	-0.985019	-1.16267	-1.61001	-1.2482	-1.3281	-1.43599	-1.1923	-1.20951	-1.48533	-1.53136	-1.50974	-1.53222	-1.05217	-1.32168	-1.21695	-1.27421
RPL27A	AZD2014	0.624561	0.00515281	Subgroup2	-0.334884	5.45e-43	0.59163	4.64e-87	-0.0499383	0.106419	1441	SN1103949359	PI3K/MTOR signaling	mTORC1, mTORC2	-	-1.4546	-1.6555	-1.73137	-1.38058	-1.55599	-1.69546	-1.23937	-1.64558	-1.41075	-1.60872	-1.50825	-1.55931	-1.6827	-1.4459	-1.47708	-1.91518	-1.11766	-0.98037	-1.22198	-0.998753	-1.26154
RPL27A	Dinaciclib	0.596491	0.00816354	Subgroup2	-0.334884	5.45e-43	0.59163	4.64e-87	-0.0499383	0.106419	1180	SCH727965, SCH 727965, SCH-727-965, MK-7965	Cell cycle	CDK1, CDK2, CDK5, CDK9	46926350	-1.4546	-1.6555	-1.73137	-1.38058	-1.55599	-1.69546	-1.23937	-1.64558	-1.41075	-1.60872	-1.50825	-1.55931	-1.6827	-1.4459	-1.47708	-1.91518	-1.11766	-0.98037	-1.22198	-0.998753	-1.26154
RRM1	Navitoclax	-0.603896	0.00447178	Subgroup2	-0.485794	1.47e-45	1.18375	1.83e-200	-0.361565	4.29e-18	1011	ABT-263, ABT263, ABT 263	Apoptosis regulation	BCL2, BCL-XL, BCL-W	24978538	-1.84677	-2.11168	-1.83054	-1.85997	-1.79059	-1.91891	-1.62712	-1.96842	-1.73448	-1.89546	-1.61459	-1.86945	-1.74753	-1.7967	-1.57103	-1.83437	-2.39665	-2.0416	-1.86666	-1.70005	-1.75957
RRM1	WEHI-539	-0.601779	0.00288516	Subgroup2	-0.485794	1.47e-45	1.18375	1.83e-200	-0.361565	4.29e-18	1997	WEHI539, WEHI-539	Apoptosis regulation	BCL-XL	71297207	-1.84677	-2.11168	-1.83054	-1.85997	-1.79059	-1.91891	-1.62712	-1.96842	-1.73448	-1.89546	-1.61459	-1.86945	-1.74753	-1.7967	-1.57103	-1.83437	-2.39665	-2.0416	-1.86666	-1.70005	-1.75957
RRM1	Rapamycin	0.606494	0.00426798	Subgroup2	-0.485794	1.47e-45	1.18375	1.83e-200	-0.361565	4.29e-18	1084	AY-22989, Sirolimus, WY-090217, Torisel, Rapamune	PI3K/MTOR signaling	MTORC1	5384616	-1.84677	-2.11168	-1.83054	-1.85997	-1.79059	-1.91891	-1.62712	-1.96842	-1.73448	-1.89546	-1.61459	-1.86945	-1.74753	-1.7967	-1.57103	-1.83437	-2.39665	-2.0416	-1.86666	-1.70005	-1.75957
RRM1	ABT737	-0.615613	0.0021875	Subgroup2	-0.485794	1.47e-45	1.18375	1.83e-200	-0.361565	4.29e-18	1910	-	Apoptosis regulation	BCL2, BCL-XL, BCL-W, BCL-B, BFL1	11228183	-1.84677	-2.11168	-1.83054	-1.85997	-1.79059	-1.91891	-1.62712	-1.96842	-1.73448	-1.89546	-1.61459	-1.86945	-1.74753	-1.7967	-1.57103	-1.83437	-2.39665	-2.0416	-1.86666	-1.70005	-1.75957
RRM2	KRAS (G12C) Inhibitor-12	-0.614035	0.00615134	Subgroup2	-0.54478	5.58e-22	1.70392	4.4e-149	-0.739826	2.15e-28	1855	GTPL8020	ERK MAPK signaling	KRAS (G12C)	73555129	-2.05715	-1.94758	-2.16636	-1.95771	-2.23687	-2.16828	-1.90647	-2.1796	-1.71887	-2.6746	-2.08575	-2.31238	-2.17203	-1.59587	-1.90905	-1.87164	-1.46431	-2.93579	-2.13833	-1.72269	-1.97888
RRM2	Vorinostat	-0.591897	0.00349107	Subgroup2	-0.54478	5.58e-22	1.70392	4.4e-149	-0.739826	2.15e-28	1012	Zolinza, SAHA, suberanilohydroxamic acid, suberoylanilide hydroxamic acid, MK-0683	Chromatin histone acetylation	HDAC inhibitor Class I, IIa, IIb, IV	5311	-2.05715	-1.94758	-2.16636	-1.95771	-2.23687	-2.16828	-1.90647	-2.1796	-1.71887	-2.6746	-2.08575	-2.31238	-2.17203	-1.59587	-1.90905	-1.87164	-1.46431	-2.93579	-2.13833	-1.72269	-1.97888
RRM2	WEHI-539	-0.551383	0.00721713	Subgroup2	-0.54478	5.58e-22	1.70392	4.4e-149	-0.739826	2.15e-28	1997	WEHI539, WEHI-539	Apoptosis regulation	BCL-XL	71297207	-2.05715	-1.94758	-2.16636	-1.95771	-2.23687	-2.16828	-1.90647	-2.1796	-1.71887	-2.6746	-2.08575	-2.31238	-2.17203	-1.59587	-1.90905	-1.87164	-1.46431	-2.93579	-2.13833	-1.72269	-1.97888
RRM2	Fulvestrant	-0.540514	0.00865021	Subgroup2	-0.54478	5.58e-22	1.70392	4.4e-149	-0.739826	2.15e-28	1816	-	Hormone-related	-	-	-2.05715	-1.94758	-2.16636	-1.95771	-2.23687	-2.16828	-1.90647	-2.1796	-1.71887	-2.6746	-2.08575	-2.31238	-2.17203	-1.59587	-1.90905	-1.87164	-1.46431	-2.93579	-2.13833	-1.72269	-1.97888
RRM2	PCI-34051	-0.598246	0.00794093	Subgroup2	-0.54478	5.58e-22	1.70392	4.4e-149	-0.739826	2.15e-28	1621	AK298746	Chromatin histone acetylation	HDAC8, HDAC6, HDAC1	24753719	-2.05715	-1.94758	-2.16636	-1.95771	-2.23687	-2.16828	-1.90647	-2.1796	-1.71887	-2.6746	-2.08575	-2.31238	-2.17203	-1.59587	-1.90905	-1.87164	-1.46431	-2.93579	-2.13833	-1.72269	-1.97888
RRM2	AGI-6780	-0.592982	0.00862403	Subgroup2	-0.54478	5.58e-22	1.70392	4.4e-149	-0.739826	2.15e-28	1634	AK162157	Metabolism	IDH2 R140Q mutant	71299339	-2.05715	-1.94758	-2.16636	-1.95771	-2.23687	-2.16828	-1.90647	-2.1796	-1.71887	-2.6746	-2.08575	-2.31238	-2.17203	-1.59587	-1.90905	-1.87164	-1.46431	-2.93579	-2.13833	-1.72269	-1.97888
RRM2	Fulvestrant	-0.540514	0.00865021	Subgroup2	-0.54478	5.58e-22	1.70392	4.4e-149	-0.739826	2.15e-28	1200	Faslodex, ICI-182780	Hormone-related	ESR	104741	-2.05715	-1.94758	-2.16636	-1.95771	-2.23687	-2.16828	-1.90647	-2.1796	-1.71887	-2.6746	-2.08575	-2.31238	-2.17203	-1.59587	-1.90905	-1.87164	-1.46431	-2.93579	-2.13833	-1.72269	-1.97888
RUVBL1	VE-822	-0.642105	0.00378473	Subgroup2	-0.303311	2.24e-35	0.742715	2.67e-148	-0.228968	1.02e-14	1613	VE 822, VE822, Berzosertib	Genome integrity	ATR	59472121	-1.87538	-1.91021	-1.94053	-1.59579	-2.11517	-1.66407	-1.58078	-1.80947	-1.68644	-2.26008	-1.93081	-1.60602	-2.09481	-2.15702	-1.83608	-1.95078	-2.17955	-1.67157	-2.04733	-1.70353	-1.76762
RUVBL1	MN-64	-0.598246	0.00794093	Subgroup2	-0.303311	2.24e-35	0.742715	2.67e-148	-0.228968	1.02e-14	1854	-	WNT signaling	TNKS1, TNKS2	2802462	-1.87538	-1.91021	-1.94053	-1.59579	-2.11517	-1.66407	-1.58078	-1.80947	-1.68644	-2.26008	-1.93081	-1.60602	-2.09481	-2.15702	-1.83608	-1.95078	-2.17955	-1.67157	-2.04733	-1.70353	-1.76762
SASS6	MK-8776	-0.597826	0.0031159	Subgroup2	-0.019504	0.514678	0.643545	1.67e-80	-0.54391	5.38e-64	2046	SCH900776	Cell cycle	CHEK1, CHEK2, CDK2	16224745	-1.11637	-0.790723	-0.845817	-1.31379	-1.09268	-0.962737	-1.22538	-1.36994	-1.17084	-1.5228	-1.33259	-1.38905	-0.890184	-1.04649	-0.967519	-0.668488	-1.35407	-0.761374	-1.09847	-1.20719	-1.31728
SASS6	Wee1 Inhibitor	-0.738142	8.98e-05	Subgroup2	-0.019504	0.514678	0.643545	1.67e-80	-0.54391	5.38e-64	1046	681640, Wee1 Inhibitor	Cell cycle	WEE1, CHEK1	10384072	-1.11637	-0.790723	-0.845817	-1.31379	-1.09268	-0.962737	-1.22538	-1.36994	-1.17084	-1.5228	-1.33259	-1.38905	-0.890184	-1.04649	-0.967519	-0.668488	-1.35407	-0.761374	-1.09847	-1.20719	-1.31728
SASS6	MK-1775	-0.610672	0.00241815	Subgroup2	-0.019504	0.514678	0.643545	1.67e-80	-0.54391	5.38e-64	1179	AZD1775	Cell cycle	WEE1, PLK1	24856436	-1.11637	-0.790723	-0.845817	-1.31379	-1.09268	-0.962737	-1.22538	-1.36994	-1.17084	-1.5228	-1.33259	-1.38905	-0.890184	-1.04649	-0.967519	-0.668488	-1.35407	-0.761374	-1.09847	-1.20719	-1.31728
SASS6	AZD6738	-0.532609	0.00983525	Subgroup2	-0.019504	0.514678	0.643545	1.67e-80	-0.54391	5.38e-64	1917	AZD 6738, AZD-6738	Genome integrity	ATR	54761306	-1.11637	-0.790723	-0.845817	-1.31379	-1.09268	-0.962737	-1.22538	-1.36994	-1.17084	-1.5228	-1.33259	-1.38905	-0.890184	-1.04649	-0.967519	-0.668488	-1.35407	-0.761374	-1.09847	-1.20719	-1.31728
SASS6	Obatoclax Mesylate	-0.603509	0.00730263	Subgroup2	-0.019504	0.514678	0.643545	1.67e-80	-0.54391	5.38e-64	1068	GX15-070MS, Obatoclax, GX15-070	Apoptosis regulation	BCL2, BCL-XL, BCL-W, MCL1	11404337	-1.11637	-0.790723	-0.845817	-1.31379	-1.09268	-0.962737	-1.22538	-1.36994	-1.17084	-1.5228	-1.33259	-1.38905	-0.890184	-1.04649	-0.967519	-0.668488	-1.35407	-0.761374	-1.09847	-1.20719	-1.31728
SASS6	AZD7762	-0.726285	0.000133083	Subgroup2	-0.019504	0.514678	0.643545	1.67e-80	-0.54391	5.38e-64	1022	AZD-7762, AZD 7762	Cell cycle	CHEK1, CHEK2	11152667	-1.11637	-0.790723	-0.845817	-1.31379	-1.09268	-0.962737	-1.22538	-1.36994	-1.17084	-1.5228	-1.33259	-1.38905	-0.890184	-1.04649	-0.967519	-0.668488	-1.35407	-0.761374	-1.09847	-1.20719	-1.31728
SF3B3	CDK9_5576	0.594737	0.00839121	Subgroup2	-0.139339	1.36e-06	0.622315	2.11e-72	-0.35488	4.64e-26	1708	SN1047226266, CDK9_5576	Cell cycle	CDK9	-	-1.67801	-1.83535	-1.56714	-1.74089	-1.84116	-1.54797	-1.49384	-2.3011	-1.48885	-1.66903	-1.57953	-1.73525	-1.69743	-1.64383	-1.82525	-1.5734	-1.5597	-1.31136	-1.70412	-1.60766	-1.83728
SF3B3	Sabutoclax	0.585965	0.00960858	Subgroup2	-0.139339	1.36e-06	0.622315	2.11e-72	-0.35488	4.64e-26	1849	BI-97C1	Apoptosis regulation	BCL2, BCL-XL, BFL1, MCL1	46236925	-1.67801	-1.83535	-1.56714	-1.74089	-1.84116	-1.54797	-1.49384	-2.3011	-1.48885	-1.66903	-1.57953	-1.73525	-1.69743	-1.64383	-1.82525	-1.5734	-1.5597	-1.31136	-1.70412	-1.60766	-1.83728
SKP2	Pevonedistat	-0.561265	0.0060921	Subgroup2	-0.218656	1.28e-17	0.7147	1.97e-125	-0.324301	7.07e-27	1529	MLN4924, MLN 4924, MLN-4924	Other	NAE	16720766	-0.825022	-0.708321	-0.764547	-0.705444	-0.647227	-0.977042	-0.833709	-0.464258	-0.79106	-1.22834	-1.15318	-0.56668	-1.17965	-0.635702	-1.22825	-0.987472	-0.741055	-0.754209	-0.508143	-0.836215	-0.789955
SKP2	Vincristine	-0.584211	0.00986849	Subgroup2	-0.218656	1.28e-17	0.7147	1.97e-125	-0.324301	7.07e-27	1818	-	Mitosis	-	-	-0.825022	-0.708321	-0.764547	-0.705444	-0.647227	-0.977042	-0.833709	-0.464258	-0.79106	-1.22834	-1.15318	-0.56668	-1.17965	-0.635702	-1.22825	-0.987472	-0.741055	-0.754209	-0.508143	-0.836215	-0.789955
SKP2	AZD7762	-0.567194	0.00549057	Subgroup2	-0.218656	1.28e-17	0.7147	1.97e-125	-0.324301	7.07e-27	1022	AZD-7762, AZD 7762	Cell cycle	CHEK1, CHEK2	11152667	-0.825022	-0.708321	-0.764547	-0.705444	-0.647227	-0.977042	-0.833709	-0.464258	-0.79106	-1.22834	-1.15318	-0.56668	-1.17965	-0.635702	-1.22825	-0.987472	-0.741055	-0.754209	-0.508143	-0.836215	-0.789955
SKP2	Obatoclax Mesylate	-0.624561	0.00515281	Subgroup2	-0.218656	1.28e-17	0.7147	1.97e-125	-0.324301	7.07e-27	1068	GX15-070MS, Obatoclax, GX15-070	Apoptosis regulation	BCL2, BCL-XL, BCL-W, MCL1	11404337	-0.825022	-0.708321	-0.764547	-0.705444	-0.647227	-0.977042	-0.833709	-0.464258	-0.79106	-1.22834	-1.15318	-0.56668	-1.17965	-0.635702	-1.22825	-0.987472	-0.741055	-0.754209	-0.508143	-0.836215	-0.789955
SKP2	Docetaxel	-0.609684	0.00246666	Subgroup2	-0.218656	1.28e-17	0.7147	1.97e-125	-0.324301	7.07e-27	1819	RP-56976, Taxotere	Mitosis	Microtubule stabiliser	-	-0.825022	-0.708321	-0.764547	-0.705444	-0.647227	-0.977042	-0.833709	-0.464258	-0.79106	-1.22834	-1.15318	-0.56668	-1.17965	-0.635702	-1.22825	-0.987472	-0.741055	-0.754209	-0.508143	-0.836215	-0.789955
SKP2	MK-1775	-0.643281	0.00120984	Subgroup2	-0.218656	1.28e-17	0.7147	1.97e-125	-0.324301	7.07e-27	1179	AZD1775	Cell cycle	WEE1, PLK1	24856436	-0.825022	-0.708321	-0.764547	-0.705444	-0.647227	-0.977042	-0.833709	-0.464258	-0.79106	-1.22834	-1.15318	-0.56668	-1.17965	-0.635702	-1.22825	-0.987472	-0.741055	-0.754209	-0.508143	-0.836215	-0.789955
SKP2	AZD6738	-0.566206	0.00558721	Subgroup2	-0.218656	1.28e-17	0.7147	1.97e-125	-0.324301	7.07e-27	1917	AZD 6738, AZD-6738	Genome integrity	ATR	54761306	-0.825022	-0.708321	-0.764547	-0.705444	-0.647227	-0.977042	-0.833709	-0.464258	-0.79106	-1.22834	-1.15318	-0.56668	-1.17965	-0.635702	-1.22825	-0.987472	-0.741055	-0.754209	-0.508143	-0.836215	-0.789955
SKP2	Vinblastine	-0.583004	0.00412476	Subgroup2	-0.218656	1.28e-17	0.7147	1.97e-125	-0.324301	7.07e-27	1004	Velban	Mitosis	Microtubule destabiliser	6710780	-0.825022	-0.708321	-0.764547	-0.705444	-0.647227	-0.977042	-0.833709	-0.464258	-0.79106	-1.22834	-1.15318	-0.56668	-1.17965	-0.635702	-1.22825	-0.987472	-0.741055	-0.754209	-0.508143	-0.836215	-0.789955
SKP2	Docetaxel	-0.609684	0.00246666	Subgroup2	-0.218656	1.28e-17	0.7147	1.97e-125	-0.324301	7.07e-27	1007	RP-56976, Taxotere	Mitosis	Microtubule stabiliser	148124	-0.825022	-0.708321	-0.764547	-0.705444	-0.647227	-0.977042	-0.833709	-0.464258	-0.79106	-1.22834	-1.15318	-0.56668	-1.17965	-0.635702	-1.22825	-0.987472	-0.741055	-0.754209	-0.508143	-0.836215	-0.789955
SMC1A	ABT737	-0.55336	0.00697922	Subgroup2	-0.139871	2.59e-08	0.639582	9.66e-104	-0.369461	7.15e-37	1910	-	Apoptosis regulation	BCL2, BCL-XL, BCL-W, BCL-B, BFL1	11228183	-1.5191	-1.86632	-1.69331	-1.43591	-2.03047	-1.40434	-1.20941	-1.57086	-1.63121	-1.62843	-1.4216	-1.28625	-1.38927	-1.43394	-1.71521	-1.54413	-1.41564	-1.3338	-1.60136	-1.43476	-1.33582
SMC1A	Gallibiscoquinazole	0.692982	0.00138008	Subgroup2	-0.139871	2.59e-08	0.639582	9.66e-104	-0.369461	7.15e-37	1830	-	Unclassified	-	-	-1.5191	-1.86632	-1.69331	-1.43591	-2.03047	-1.40434	-1.20941	-1.57086	-1.63121	-1.62843	-1.4216	-1.28625	-1.38927	-1.43394	-1.71521	-1.54413	-1.41564	-1.3338	-1.60136	-1.43476	-1.33582
SMC1A	Navitoclax	-0.641558	0.00218729	Subgroup2	-0.139871	2.59e-08	0.639582	9.66e-104	-0.369461	7.15e-37	1011	ABT-263, ABT263, ABT 263	Apoptosis regulation	BCL2, BCL-XL, BCL-W	24978538	-1.5191	-1.86632	-1.69331	-1.43591	-2.03047	-1.40434	-1.20941	-1.57086	-1.63121	-1.62843	-1.4216	-1.28625	-1.38927	-1.43394	-1.71521	-1.54413	-1.41564	-1.3338	-1.60136	-1.43476	-1.33582
SMC1A	SCH772984	0.597826	0.0031159	Subgroup2	-0.139871	2.59e-08	0.639582	9.66e-104	-0.369461	7.15e-37	1564	CS-1421	ERK MAPK signaling	ERK1, ERK2	24866313	-1.5191	-1.86632	-1.69331	-1.43591	-2.03047	-1.40434	-1.20941	-1.57086	-1.63121	-1.62843	-1.4216	-1.28625	-1.38927	-1.43394	-1.71521	-1.54413	-1.41564	-1.3338	-1.60136	-1.43476	-1.33582
SMC1A	EPZ5676	0.588933	0.00369248	Subgroup2	-0.139871	2.59e-08	0.639582	9.66e-104	-0.369461	7.15e-37	1563	EPZ-5676, Pinometostat	Chromatin histone methylation	DOT1L	57345410	-1.5191	-1.86632	-1.69331	-1.43591	-2.03047	-1.40434	-1.20941	-1.57086	-1.63121	-1.62843	-1.4216	-1.28625	-1.38927	-1.43394	-1.71521	-1.54413	-1.41564	-1.3338	-1.60136	-1.43476	-1.33582
SMC4	AZD7762	-0.641304	0.00126447	Subgroup2	-0.573275	2.1e-59	1.21817	8.11e-196	-0.267907	8.74e-10	1022	AZD-7762, AZD 7762	Cell cycle	CHEK1, CHEK2	11152667	-1.2222	-1.29491	-1.20545	-0.968643	-1.4029	-1.16473	-1.47092	-1.34721	-1.09433	-1.41635	-1.18941	-1.43691	-1.07524	-1.0702	-1.16409	-1.30101	-0.898792	-1.29772	-1.321	-1.07045	-1.25374
SMC4	MK-1775	-0.564229	0.00578478	Subgroup2	-0.573275	2.1e-59	1.21817	8.11e-196	-0.267907	8.74e-10	1179	AZD1775	Cell cycle	WEE1, PLK1	24856436	-1.2222	-1.29491	-1.20545	-0.968643	-1.4029	-1.16473	-1.47092	-1.34721	-1.09433	-1.41635	-1.18941	-1.43691	-1.07524	-1.0702	-1.16409	-1.30101	-0.898792	-1.29772	-1.321	-1.07045	-1.25374
SMC4	ERK_2440	0.596491	0.00816354	Subgroup2	-0.573275	2.1e-59	1.21817	8.11e-196	-0.267907	8.74e-10	1713	SN1051032892, ERK_2440	ERK MAPK signaling	ERK1,ERK2	-	-1.2222	-1.29491	-1.20545	-0.968643	-1.4029	-1.16473	-1.47092	-1.34721	-1.09433	-1.41635	-1.18941	-1.43691	-1.07524	-1.0702	-1.16409	-1.30101	-0.898792	-1.29772	-1.321	-1.07045	-1.25374
SMC4	AZD6738	-0.55336	0.00697922	Subgroup2	-0.573275	2.1e-59	1.21817	8.11e-196	-0.267907	8.74e-10	1917	AZD 6738, AZD-6738	Genome integrity	ATR	54761306	-1.2222	-1.29491	-1.20545	-0.968643	-1.4029	-1.16473	-1.47092	-1.34721	-1.09433	-1.41635	-1.18941	-1.43691	-1.07524	-1.0702	-1.16409	-1.30101	-0.898792	-1.29772	-1.321	-1.07045	-1.25374
SNRPB	MN-64	-0.610526	0.0065173	Subgroup2	-0.343795	1.32e-44	0.708986	3.02e-129	-0.141521	2.97e-06	1854	-	WNT signaling	TNKS1, TNKS2	2802462	-1.81243	-2.0363	-1.57329	-1.79501	-2.24104	-1.92423	-1.74914	-2.10611	-1.65312	-2.36236	-1.75164	-1.8897	-1.79052	-1.55151	-1.84673	-1.90914	-1.1986	-1.23531	-1.88117	-1.89414	-1.85959
SNRPD1	MK-1775	-0.616601	0.00214367	Subgroup2	-0.197472	7.84e-20	0.611666	5.01e-128	-0.262868	1.38e-24	1179	AZD1775	Cell cycle	WEE1, PLK1	24856436	-2.19463	-2.41106	-2.15358	-1.89438	-2.19383	-2.0713	-1.91699	-2.36338	-1.98172	-2.08178	-2.1459	-2.62838	-2.35788	-2.03392	-1.85252	-2.10718	-2.72582	-2.30604	-2.28265	-2.14276	-2.24143
SNRPD1	Ibrutinib	-0.612281	0.00633216	Subgroup2	-0.197472	7.84e-20	0.611666	5.01e-128	-0.262868	1.38e-24	1799	PCI-32765, CRA-032765, PCI-32765-00	Other, kinases	BTK	24821094	-2.19463	-2.41106	-2.15358	-1.89438	-2.19383	-2.0713	-1.91699	-2.36338	-1.98172	-2.08178	-2.1459	-2.62838	-2.35788	-2.03392	-1.85252	-2.10718	-2.72582	-2.30604	-2.28265	-2.14276	-2.24143
SNRPD1	AZD7762	-0.684783	0.000442408	Subgroup2	-0.197472	7.84e-20	0.611666	5.01e-128	-0.262868	1.38e-24	1022	AZD-7762, AZD 7762	Cell cycle	CHEK1, CHEK2	11152667	-2.19463	-2.41106	-2.15358	-1.89438	-2.19383	-2.0713	-1.91699	-2.36338	-1.98172	-2.08178	-2.1459	-2.62838	-2.35788	-2.03392	-1.85252	-2.10718	-2.72582	-2.30604	-2.28265	-2.14276	-2.24143
SNRPD1	PCI-34051	-0.707018	0.00100637	Subgroup2	-0.197472	7.84e-20	0.611666	5.01e-128	-0.262868	1.38e-24	1621	AK298746	Chromatin histone acetylation	HDAC8, HDAC6, HDAC1	24753719	-2.19463	-2.41106	-2.15358	-1.89438	-2.19383	-2.0713	-1.91699	-2.36338	-1.98172	-2.08178	-2.1459	-2.62838	-2.35788	-2.03392	-1.85252	-2.10718	-2.72582	-2.30604	-2.28265	-2.14276	-2.24143
SNRPD1	KRAS (G12C) Inhibitor-12	-0.601754	0.00751056	Subgroup2	-0.197472	7.84e-20	0.611666	5.01e-128	-0.262868	1.38e-24	1855	GTPL8020	ERK MAPK signaling	KRAS (G12C)	73555129	-2.19463	-2.41106	-2.15358	-1.89438	-2.19383	-2.0713	-1.91699	-2.36338	-1.98172	-2.08178	-2.1459	-2.62838	-2.35788	-2.03392	-1.85252	-2.10718	-2.72582	-2.30604	-2.28265	-2.14276	-2.24143
SNRPD1	MK-8776	-0.555336	0.00674791	Subgroup2	-0.197472	7.84e-20	0.611666	5.01e-128	-0.262868	1.38e-24	2046	SCH900776	Cell cycle	CHEK1, CHEK2, CDK2	16224745	-2.19463	-2.41106	-2.15358	-1.89438	-2.19383	-2.0713	-1.91699	-2.36338	-1.98172	-2.08178	-2.1459	-2.62838	-2.35788	-2.03392	-1.85252	-2.10718	-2.72582	-2.30604	-2.28265	-2.14276	-2.24143
SNRPF	Pevonedistat	-0.630435	0.00160363	Subgroup2	-0.30083	6.75e-44	0.602503	1.72e-118	-0.107954	5.62e-05	1529	MLN4924, MLN 4924, MLN-4924	Other	NAE	16720766	-1.88703	-2.00354	-1.96893	-1.95074	-1.86172	-1.9013	-1.88461	-2.07084	-1.82479	-1.93518	-1.82404	-1.71798	-1.75345	-1.90121	-2.20174	-2.26648	-1.57663	-1.77048	-1.71784	-1.89344	-1.71563
SPC25	MK-8776	-0.559289	0.00630449	Subgroup2	-0.744166	6.64e-37	1.87625	8.64e-168	-0.609754	7.77e-18	2046	SCH900776	Cell cycle	CHEK1, CHEK2, CDK2	16224745	-1.25674	-1.24121	-1.06975	-1.21985	-1.66261	-1.41423	-1.23764	-1.58386	-1.18763	-1.36827	-1.18186	-1.27944	-1.29115	-1.22502	-1.19409	-1.27635	-0.97675	-1.26372	-1.26486	-0.878962	-1.31754
SPC25	Fulvestrant	-0.556324	0.00663468	Subgroup2	-0.744166	6.64e-37	1.87625	8.64e-168	-0.609754	7.77e-18	1816	-	Hormone-related	-	-	-1.25674	-1.24121	-1.06975	-1.21985	-1.66261	-1.41423	-1.23764	-1.58386	-1.18763	-1.36827	-1.18186	-1.27944	-1.29115	-1.22502	-1.19409	-1.27635	-0.97675	-1.26372	-1.26486	-0.878962	-1.31754
SPC25	AZD7762	-0.590909	0.00355715	Subgroup2	-0.744166	6.64e-37	1.87625	8.64e-168	-0.609754	7.77e-18	1022	AZD-7762, AZD 7762	Cell cycle	CHEK1, CHEK2	11152667	-1.25674	-1.24121	-1.06975	-1.21985	-1.66261	-1.41423	-1.23764	-1.58386	-1.18763	-1.36827	-1.18186	-1.27944	-1.29115	-1.22502	-1.19409	-1.27635	-0.97675	-1.26372	-1.26486	-0.878962	-1.31754
SPC25	Fulvestrant	-0.556324	0.00663468	Subgroup2	-0.744166	6.64e-37	1.87625	8.64e-168	-0.609754	7.77e-18	1200	Faslodex, ICI-182780	Hormone-related	ESR	104741	-1.25674	-1.24121	-1.06975	-1.21985	-1.66261	-1.41423	-1.23764	-1.58386	-1.18763	-1.36827	-1.18186	-1.27944	-1.29115	-1.22502	-1.19409	-1.27635	-0.97675	-1.26372	-1.26486	-0.878962	-1.31754
SSRP1	BIBR-1532	0.571146	0.0051179	Subgroup2	-0.34429	2.87e-43	0.836458	2.62e-186	-0.25404	5.61e-17	2043	-	Genome integrity	TERT	9927531	-1.36892	-1.45744	-1.52665	-1.37697	-1.42534	-1.35685	-1.22284	-1.53501	-1.32146	-1.35315	-1.39161	-1.45458	-1.53557	-1.11726	-1.21819	-1.27541	-1.43331	-1.60009	-1.30954	-1.35319	-1.1139
SSRP1	Linsitinib	0.570158	0.00520901	Subgroup2	-0.34429	2.87e-43	0.836458	2.62e-186	-0.25404	5.61e-17	1510	OSI-906, ASP-7487	IGF1R signaling	IGF1R	11640390	-1.36892	-1.45744	-1.52665	-1.37697	-1.42534	-1.35685	-1.22284	-1.53501	-1.32146	-1.35315	-1.39161	-1.45458	-1.53557	-1.11726	-1.21819	-1.27541	-1.43331	-1.60009	-1.30954	-1.35319	-1.1139
STIL	Pevonedistat	-0.548419	0.00758668	Subgroup2	-0.276616	1.39e-16	1.00492	1.61e-149	-0.499774	2.7e-37	1529	MLN4924, MLN 4924, MLN-4924	Other	NAE	16720766	-0.853429	-0.588166	-0.663615	-1.06334	-0.774063	-0.768267	-0.904347	-1.43526	-0.999935	-0.95612	-0.89767	-0.703423	-0.547624	-0.837659	-0.917179	-1.40017	-0.428129	-0.511603	-0.762702	-1.00074	-0.908577
STIL	Navitoclax	-0.558442	0.00957501	Subgroup2	-0.276616	1.39e-16	1.00492	1.61e-149	-0.499774	2.7e-37	1011	ABT-263, ABT263, ABT 263	Apoptosis regulation	BCL2, BCL-XL, BCL-W	24978538	-0.853429	-0.588166	-0.663615	-1.06334	-0.774063	-0.768267	-0.904347	-1.43526	-0.999935	-0.95612	-0.89767	-0.703423	-0.547624	-0.837659	-0.917179	-1.40017	-0.428129	-0.511603	-0.762702	-1.00074	-0.908577
STIL	Obatoclax Mesylate	-0.684211	0.00166562	Subgroup2	-0.276616	1.39e-16	1.00492	1.61e-149	-0.499774	2.7e-37	1068	GX15-070MS, Obatoclax, GX15-070	Apoptosis regulation	BCL2, BCL-XL, BCL-W, MCL1	11404337	-0.853429	-0.588166	-0.663615	-1.06334	-0.774063	-0.768267	-0.904347	-1.43526	-0.999935	-0.95612	-0.89767	-0.703423	-0.547624	-0.837659	-0.917179	-1.40017	-0.428129	-0.511603	-0.762702	-1.00074	-0.908577
TAF10	Sepantronium bromide	0.568182	0.00539533	Subgroup2	-0.703097	2.53e-155	0.649302	1.16e-75	0.421725	4.36e-35	1941	YM155, YM-155, YM 155	Apoptosis regulation	BIRC5	11178236	-0.859984	-0.811746	-0.866351	-1.07775	-0.584045	-1.19002	-0.738104	-0.882023	-0.897101	-1.03977	-1.00866	-0.991834	-0.667396	-0.607381	-0.730177	-0.619765	-1.33162	-0.79175	-0.815918	-0.877618	-0.67065
TAF10	PD173074	-0.596838	0.00317596	Subgroup2	-0.703097	2.53e-155	0.649302	1.16e-75	0.421725	4.36e-35	1049	PD-173074, PD 173074	RTK signaling	FGFR1, FGFR2, FGFR3	1401	-0.859984	-0.811746	-0.866351	-1.07775	-0.584045	-1.19002	-0.738104	-0.882023	-0.897101	-1.03977	-1.00866	-0.991834	-0.667396	-0.607381	-0.730177	-0.619765	-1.33162	-0.79175	-0.815918	-0.877618	-0.67065
TFRC	BIBR-1532	0.555336	0.00674791	Subgroup2	-0.559966	2e-54	0.70007	5.29e-53	0.173375	0.000116363	2043	-	Genome integrity	TERT	9927531	-0.846644	-0.991495	-1.1046	-0.365926	-1.54577	-0.807908	-0.756968	-0.495132	-0.958785	-0.227484	-0.960805	-0.945044	-0.583644	-0.2449	-0.8592	-0.567811	-1.18024	-1.2947	-0.81646	-1.14143	-1.08459
TFRC	BDP-00009066	-0.538538	0.00893468	Subgroup2	-0.559966	2e-54	0.70007	5.29e-53	0.173375	0.000116363	1866	-	Cytoskeleton	MRCKB_HUMAN	-	-0.846644	-0.991495	-1.1046	-0.365926	-1.54577	-0.807908	-0.756968	-0.495132	-0.958785	-0.227484	-0.960805	-0.945044	-0.583644	-0.2449	-0.8592	-0.567811	-1.18024	-1.2947	-0.81646	-1.14143	-1.08459
TFRC	MIM1	-0.733202	0.000106157	Subgroup2	-0.559966	2e-54	0.70007	5.29e-53	0.173375	0.000116363	1996	MIM 1, MIM-1	Apoptosis regulation	MCL1	16241412	-0.846644	-0.991495	-1.1046	-0.365926	-1.54577	-0.807908	-0.756968	-0.495132	-0.958785	-0.227484	-0.960805	-0.945044	-0.583644	-0.2449	-0.8592	-0.567811	-1.18024	-1.2947	-0.81646	-1.14143	-1.08459
TFRC	EPZ5676	0.541502	0.00851083	Subgroup2	-0.559966	2e-54	0.70007	5.29e-53	0.173375	0.000116363	1563	EPZ-5676, Pinometostat	Chromatin histone methylation	DOT1L	57345410	-0.846644	-0.991495	-1.1046	-0.365926	-1.54577	-0.807908	-0.756968	-0.495132	-0.958785	-0.227484	-0.960805	-0.945044	-0.583644	-0.2449	-0.8592	-0.567811	-1.18024	-1.2947	-0.81646	-1.14143	-1.08459
TOPBP1	Wee1 Inhibitor	-0.655138	0.000922116	Subgroup2	-0.240001	5.71e-15	0.862358	1.4e-127	-0.425143	4.21e-32	1046	681640, Wee1 Inhibitor	Cell cycle	WEE1, CHEK1	10384072	-0.967682	-0.665456	-1.03349	-1.06344	-0.815904	-0.728716	-1.08719	-1.04918	-0.98957	-0.794291	-0.99603	-0.977494	-0.774695	-1.1917	-0.70192	-1.16454	-1.09372	-0.96665	-0.969419	-1.2558	-1.03443
TOPBP1	AZD7762	-0.679842	0.000503073	Subgroup2	-0.240001	5.71e-15	0.862358	1.4e-127	-0.425143	4.21e-32	1022	AZD-7762, AZD 7762	Cell cycle	CHEK1, CHEK2	11152667	-0.967682	-0.665456	-1.03349	-1.06344	-0.815904	-0.728716	-1.08719	-1.04918	-0.98957	-0.794291	-0.99603	-0.977494	-0.774695	-1.1917	-0.70192	-1.16454	-1.09372	-0.96665	-0.969419	-1.2558	-1.03443
TOPBP1	MK-8776	-0.538538	0.00893468	Subgroup2	-0.240001	5.71e-15	0.862358	1.4e-127	-0.425143	4.21e-32	2046	SCH900776	Cell cycle	CHEK1, CHEK2, CDK2	16224745	-0.967682	-0.665456	-1.03349	-1.06344	-0.815904	-0.728716	-1.08719	-1.04918	-0.98957	-0.794291	-0.99603	-0.977494	-0.774695	-1.1917	-0.70192	-1.16454	-1.09372	-0.96665	-0.969419	-1.2558	-1.03443
TOPBP1	MK-1775	-0.54249	0.00837334	Subgroup2	-0.240001	5.71e-15	0.862358	1.4e-127	-0.425143	4.21e-32	1179	AZD1775	Cell cycle	WEE1, PLK1	24856436	-0.967682	-0.665456	-1.03349	-1.06344	-0.815904	-0.728716	-1.08719	-1.04918	-0.98957	-0.794291	-0.99603	-0.977494	-0.774695	-1.1917	-0.70192	-1.16454	-1.09372	-0.96665	-0.969419	-1.2558	-1.03443
TOPBP1	ERK_2440	0.596491	0.00816354	Subgroup2	-0.240001	5.71e-15	0.862358	1.4e-127	-0.425143	4.21e-32	1713	SN1051032892, ERK_2440	ERK MAPK signaling	ERK1,ERK2	-	-0.967682	-0.665456	-1.03349	-1.06344	-0.815904	-0.728716	-1.08719	-1.04918	-0.98957	-0.794291	-0.99603	-0.977494	-0.774695	-1.1917	-0.70192	-1.16454	-1.09372	-0.96665	-0.969419	-1.2558	-1.03443
TPX2	MK-1775	-0.544466	0.00810389	Subgroup2	-0.649765	4.53e-34	1.79241	1.77e-190	-0.669338	1.28e-25	1179	AZD1775	Cell cycle	WEE1, PLK1	24856436	-1.28807	-1.57285	-1.46004	-1.33396	-1.51323	-1.21964	-1.50491	-1.40794	-1.35629	-1.31513	-1.22128	-1.43824	-1.24039	-1.27966	-0.835101	-1.29942	-1.34917	-1.0438	-0.900206	-1.25266	-1.21737
TPX2	AZD7762	-0.547431	0.00771332	Subgroup2	-0.649765	4.53e-34	1.79241	1.77e-190	-0.669338	1.28e-25	1022	AZD-7762, AZD 7762	Cell cycle	CHEK1, CHEK2	11152667	-1.28807	-1.57285	-1.46004	-1.33396	-1.51323	-1.21964	-1.50491	-1.40794	-1.35629	-1.31513	-1.22128	-1.43824	-1.24039	-1.27966	-0.835101	-1.29942	-1.34917	-1.0438	-0.900206	-1.25266	-1.21737
TPX2	WEHI-539	-0.56917	0.00530149	Subgroup2	-0.649765	4.53e-34	1.79241	1.77e-190	-0.669338	1.28e-25	1997	WEHI539, WEHI-539	Apoptosis regulation	BCL-XL	71297207	-1.28807	-1.57285	-1.46004	-1.33396	-1.51323	-1.21964	-1.50491	-1.40794	-1.35629	-1.31513	-1.22128	-1.43824	-1.24039	-1.27966	-0.835101	-1.29942	-1.34917	-1.0438	-0.900206	-1.25266	-1.21737
TRAIP	Vorinostat	-0.551383	0.00721713	Subgroup2	-0.246698	4.12e-14	1.01343	3.44e-163	-0.549817	6.9e-48	1012	Zolinza, SAHA, suberanilohydroxamic acid, suberoylanilide hydroxamic acid, MK-0683	Chromatin histone acetylation	HDAC inhibitor Class I, IIa, IIb, IV	5311	-0.987197	-1.03089	-1.1953	-0.647418	-1.49635	-0.590732	-1.16589	-1.05943	-1.05163	-0.971127	-0.428195	-0.701582	-1.07369	-0.805728	-1.21879	-1.05849	-1.08153	-1.09437	-1.2131	-0.871128	-0.988557
TRAIP	Cisplatin	-0.555336	0.00674791	Subgroup2	-0.246698	4.12e-14	1.01343	3.44e-163	-0.549817	6.9e-48	1005	cis-Diammineplatinum(II) dichloride, Platinol, CIS-DDP	DNA replication	DNA crosslinker	84691	-0.987197	-1.03089	-1.1953	-0.647418	-1.49635	-0.590732	-1.16589	-1.05943	-1.05163	-0.971127	-0.428195	-0.701582	-1.07369	-0.805728	-1.21879	-1.05849	-1.08153	-1.09437	-1.2131	-0.871128	-0.988557
TRAIP	AZD6738	-0.624506	0.00181898	Subgroup2	-0.246698	4.12e-14	1.01343	3.44e-163	-0.549817	6.9e-48	1917	AZD 6738, AZD-6738	Genome integrity	ATR	54761306	-0.987197	-1.03089	-1.1953	-0.647418	-1.49635	-0.590732	-1.16589	-1.05943	-1.05163	-0.971127	-0.428195	-0.701582	-1.07369	-0.805728	-1.21879	-1.05849	-1.08153	-1.09437	-1.2131	-0.871128	-0.988557
TSEN54	Dabrafenib	0.551383	0.00721713	Subgroup2	-0.268244	1.26e-22	0.585652	3.6e-68	-0.13926	2.98e-05	1373	GSK2118436, Tafinlar	ERK MAPK signaling	BRAF	44462760	-0.899033	-0.849899	-0.850357	-0.659087	-0.758203	-0.900169	-0.926891	-0.764504	-1.09464	-1.05446	-1.179	-0.967965	-0.945398	-0.884255	-0.916065	-0.97363	-0.327952	-1.2877	-0.816287	-0.692853	-1.13135
TSEN54	Dactolisib	-0.62253	0.00189597	Subgroup2	-0.268244	1.26e-22	0.585652	3.6e-68	-0.13926	2.98e-05	1057	NVP-BEZ235, BEZ235	PI3K/MTOR signaling	PI3K (class 1), MTORC1, MTORC2	11977753	-0.899033	-0.849899	-0.850357	-0.659087	-0.758203	-0.900169	-0.926891	-0.764504	-1.09464	-1.05446	-1.179	-0.967965	-0.945398	-0.884255	-0.916065	-0.97363	-0.327952	-1.2877	-0.816287	-0.692853	-1.13135
TTF2	WZ4003	-0.589474	0.00910547	Subgroup2	-0.326053	3.18e-49	0.639315	1.68e-128	-0.104832	0.000138343	1614	WZ 4003	Other, kinases	NUAK1, NUAK2	72200024	-0.814998	-0.816462	-1.08916	-0.805412	-1.29738	-0.786906	-0.950198	-0.941904	-0.701782	-0.695894	-0.842158	-0.722241	-0.768964	-0.731843	-0.71379	-0.840698	-0.630091	-0.38451	-0.794549	-0.732914	-1.05311
TTF2	Nelarabine	0.615789	0.00597476	Subgroup2	-0.326053	3.18e-49	0.639315	1.68e-128	-0.104832	0.000138343	1814	Atriance, Arranon	DNA replication	-	-	-0.814998	-0.816462	-1.08916	-0.805412	-1.29738	-0.786906	-0.950198	-0.941904	-0.701782	-0.695894	-0.842158	-0.722241	-0.768964	-0.731843	-0.71379	-0.840698	-0.630091	-0.38451	-0.794549	-0.732914	-1.05311
TTF2	Acetalax	0.631579	0.00456396	Subgroup2	-0.326053	3.18e-49	0.639315	1.68e-128	-0.104832	0.000138343	1804	Oxyphenisatin acetate	Unclassified	-	-	-0.814998	-0.816462	-1.08916	-0.805412	-1.29738	-0.786906	-0.950198	-0.941904	-0.701782	-0.695894	-0.842158	-0.722241	-0.768964	-0.731843	-0.71379	-0.840698	-0.630091	-0.38451	-0.794549	-0.732914	-1.05311
TTF2	Gallibiscoquinazole	0.603509	0.00730263	Subgroup2	-0.326053	3.18e-49	0.639315	1.68e-128	-0.104832	0.000138343	1830	-	Unclassified	-	-	-0.814998	-0.816462	-1.08916	-0.805412	-1.29738	-0.786906	-0.950198	-0.941904	-0.701782	-0.695894	-0.842158	-0.722241	-0.768964	-0.731843	-0.71379	-0.840698	-0.630091	-0.38451	-0.794549	-0.732914	-1.05311
TTF2	Vincristine	-0.682456	0.00172809	Subgroup2	-0.326053	3.18e-49	0.639315	1.68e-128	-0.104832	0.000138343	1818	-	Mitosis	-	-	-0.814998	-0.816462	-1.08916	-0.805412	-1.29738	-0.786906	-0.950198	-0.941904	-0.701782	-0.695894	-0.842158	-0.722241	-0.768964	-0.731843	-0.71379	-0.840698	-0.630091	-0.38451	-0.794549	-0.732914	-1.05311
TTF2	Navitoclax	-0.572727	0.00761749	Subgroup2	-0.326053	3.18e-49	0.639315	1.68e-128	-0.104832	0.000138343	1011	ABT-263, ABT263, ABT 263	Apoptosis regulation	BCL2, BCL-XL, BCL-W	24978538	-0.814998	-0.816462	-1.08916	-0.805412	-1.29738	-0.786906	-0.950198	-0.941904	-0.701782	-0.695894	-0.842158	-0.722241	-0.768964	-0.731843	-0.71379	-0.840698	-0.630091	-0.38451	-0.794549	-0.732914	-1.05311
TTK	Navitoclax	-0.571429	0.00778049	Subgroup2	-0.266122	6.15e-06	1.61643	5.96e-125	-1.05783	3.54e-56	1011	ABT-263, ABT263, ABT 263	Apoptosis regulation	BCL2, BCL-XL, BCL-W	24978538	-0.92994	-0.769297	-0.875629	-0.876866	-1.4353	-0.742283	-0.82908	-0.88973	-0.693961	-0.860868	-0.92179	-0.984829	-1.09778	-1.0045	-1.05017	-1.16909	-1.31912	-0.723345	-0.83294	-0.753679	-0.768527
TTK	AZD7762	-0.602767	0.00282979	Subgroup2	-0.266122	6.15e-06	1.61643	5.96e-125	-1.05783	3.54e-56	1022	AZD-7762, AZD 7762	Cell cycle	CHEK1, CHEK2	11152667	-0.92994	-0.769297	-0.875629	-0.876866	-1.4353	-0.742283	-0.82908	-0.88973	-0.693961	-0.860868	-0.92179	-0.984829	-1.09778	-1.0045	-1.05017	-1.16909	-1.31912	-0.723345	-0.83294	-0.753679	-0.768527
TTK	MK-1775	-0.540514	0.00865021	Subgroup2	-0.266122	6.15e-06	1.61643	5.96e-125	-1.05783	3.54e-56	1179	AZD1775	Cell cycle	WEE1, PLK1	24856436	-0.92994	-0.769297	-0.875629	-0.876866	-1.4353	-0.742283	-0.82908	-0.88973	-0.693961	-0.860868	-0.92179	-0.984829	-1.09778	-1.0045	-1.05017	-1.16909	-1.31912	-0.723345	-0.83294	-0.753679	-0.768527
TTK	WEHI-539	-0.536561	0.0092269	Subgroup2	-0.266122	6.15e-06	1.61643	5.96e-125	-1.05783	3.54e-56	1997	WEHI539, WEHI-539	Apoptosis regulation	BCL-XL	71297207	-0.92994	-0.769297	-0.875629	-0.876866	-1.4353	-0.742283	-0.82908	-0.88973	-0.693961	-0.860868	-0.92179	-0.984829	-1.09778	-1.0045	-1.05017	-1.16909	-1.31912	-0.723345	-0.83294	-0.753679	-0.768527
TYMS	ABT737	-0.608696	0.00251599	Subgroup2	-0.585222	1.38e-21	1.84489	1.52e-148	-0.807604	9.02e-29	1910	-	Apoptosis regulation	BCL2, BCL-XL, BCL-W, BCL-B, BFL1	11228183	-0.620635	-1.5667	-1.10116	-0.290081	-0.283519	-1.26978	-0.201969	-0.570976	-0.459943	-0.642109	-1.35611	-0.403128	-1.34893	-0.37473	-0.45543	-0.407411	-0.15207	-0.0286143	-1.36254	-0.00758466	-0.129907
TYMS	Ulixertinib	0.567194	0.00549057	Subgroup2	-0.585222	1.38e-21	1.84489	1.52e-148	-0.807604	9.02e-29	2047	BVD-523, VRT752271	ERK MAPK signaling	ERK1, ERK2	11719003, 58641927	-0.620635	-1.5667	-1.10116	-0.290081	-0.283519	-1.26978	-0.201969	-0.570976	-0.459943	-0.642109	-1.35611	-0.403128	-1.34893	-0.37473	-0.45543	-0.407411	-0.15207	-0.0286143	-1.36254	-0.00758466	-0.129907
TYMS	WEHI-539	-0.583992	0.00404989	Subgroup2	-0.585222	1.38e-21	1.84489	1.52e-148	-0.807604	9.02e-29	1997	WEHI539, WEHI-539	Apoptosis regulation	BCL-XL	71297207	-0.620635	-1.5667	-1.10116	-0.290081	-0.283519	-1.26978	-0.201969	-0.570976	-0.459943	-0.642109	-1.35611	-0.403128	-1.34893	-0.37473	-0.45543	-0.407411	-0.15207	-0.0286143	-1.36254	-0.00758466	-0.129907
TYMS	AZD6738	-0.567194	0.00549057	Subgroup2	-0.585222	1.38e-21	1.84489	1.52e-148	-0.807604	9.02e-29	1917	AZD 6738, AZD-6738	Genome integrity	ATR	54761306	-0.620635	-1.5667	-1.10116	-0.290081	-0.283519	-1.26978	-0.201969	-0.570976	-0.459943	-0.642109	-1.35611	-0.403128	-1.34893	-0.37473	-0.45543	-0.407411	-0.15207	-0.0286143	-1.36254	-0.00758466	-0.129907
TYMS	Ulixertinib	0.567194	0.00549057	Subgroup2	-0.585222	1.38e-21	1.84489	1.52e-148	-0.807604	9.02e-29	1908	BVD-523, VRT752271	ERK MAPK signaling	ERK1, ERK2	11719003, 58641927	-0.620635	-1.5667	-1.10116	-0.290081	-0.283519	-1.26978	-0.201969	-0.570976	-0.459943	-0.642109	-1.35611	-0.403128	-1.34893	-0.37473	-0.45543	-0.407411	-0.15207	-0.0286143	-1.36254	-0.00758466	-0.129907
WDHD1	EPZ5676	0.600791	0.00294145	Subgroup2	-0.237382	2e-15	0.956153	3.13e-175	-0.512172	1.79e-49	1563	EPZ-5676, Pinometostat	Chromatin histone methylation	DOT1L	57345410	-1.20086	-1.21752	-0.982056	-1.25533	-1.63498	-1.03243	-1.00002	-1.32427	-0.920741	-1.30445	-1.063	-0.978761	-1.0271	-1.21531	-1.16356	-1.26182	-1.55657	-1.22299	-1.17362	-1.3768	-1.30597
WDHD1	AZD8186	0.563241	0.00588575	Subgroup2	-0.237382	2e-15	0.956153	3.13e-175	-0.512172	1.79e-49	1918	AZD 8186, AZD-8186	PI3K/MTOR signaling	PI3Kalpha, PI3Kbeta	52913813	-1.20086	-1.21752	-0.982056	-1.25533	-1.63498	-1.03243	-1.00002	-1.32427	-0.920741	-1.30445	-1.063	-0.978761	-1.0271	-1.21531	-1.16356	-1.26182	-1.55657	-1.22299	-1.17362	-1.3768	-1.30597
WDHD1	RVX-208	0.684211	0.00166562	Subgroup2	-0.237382	2e-15	0.956153	3.13e-175	-0.512172	1.79e-49	1625	1044870-39-4, Apabetalone	Chromatin other	BRD4	24871506	-1.20086	-1.21752	-0.982056	-1.25533	-1.63498	-1.03243	-1.00002	-1.32427	-0.920741	-1.30445	-1.063	-0.978761	-1.0271	-1.21531	-1.16356	-1.26182	-1.55657	-1.22299	-1.17362	-1.3768	-1.30597
WDHD1	Fludarabine	0.605263	0.00709942	Subgroup2	-0.237382	2e-15	0.956153	3.13e-175	-0.512172	1.79e-49	1813	Fludara	Unclassified	-	-	-1.20086	-1.21752	-0.982056	-1.25533	-1.63498	-1.03243	-1.00002	-1.32427	-0.920741	-1.30445	-1.063	-0.978761	-1.0271	-1.21531	-1.16356	-1.26182	-1.55657	-1.22299	-1.17362	-1.3768	-1.30597
WDHD1	AMG-319	0.597826	0.0031159	Subgroup2	-0.237382	2e-15	0.956153	3.13e-175	-0.512172	1.79e-49	2045	AMG319	PI3K/MTOR signaling	PI3K (beta sparing)	68947304	-1.20086	-1.21752	-0.982056	-1.25533	-1.63498	-1.03243	-1.00002	-1.32427	-0.920741	-1.30445	-1.063	-0.978761	-1.0271	-1.21531	-1.16356	-1.26182	-1.55657	-1.22299	-1.17362	-1.3768	-1.30597
WDHD1	Rapamycin	0.555844	0.00997194	Subgroup2	-0.237382	2e-15	0.956153	3.13e-175	-0.512172	1.79e-49	1084	AY-22989, Sirolimus, WY-090217, Torisel, Rapamune	PI3K/MTOR signaling	MTORC1	5384616	-1.20086	-1.21752	-0.982056	-1.25533	-1.63498	-1.03243	-1.00002	-1.32427	-0.920741	-1.30445	-1.063	-0.978761	-1.0271	-1.21531	-1.16356	-1.26182	-1.55657	-1.22299	-1.17362	-1.3768	-1.30597
WDHD1	Taselisib	0.643281	0.00120984	Subgroup2	-0.237382	2e-15	0.956153	3.13e-175	-0.512172	1.79e-49	1561	GDC-0032, GDC0032, RG7604	PI3K/MTOR signaling	PI3K (beta sparing)	51001932	-1.20086	-1.21752	-0.982056	-1.25533	-1.63498	-1.03243	-1.00002	-1.32427	-0.920741	-1.30445	-1.063	-0.978761	-1.0271	-1.21531	-1.16356	-1.26182	-1.55657	-1.22299	-1.17362	-1.3768	-1.30597
WDHD1	Selumetinib	0.673684	0.00206967	Subgroup2	-0.237382	2e-15	0.956153	3.13e-175	-0.512172	1.79e-49	1736	SN1103949345, AZD1480	ERK MAPK signaling	MEK1, MEK2	-	-1.20086	-1.21752	-0.982056	-1.25533	-1.63498	-1.03243	-1.00002	-1.32427	-0.920741	-1.30445	-1.063	-0.978761	-1.0271	-1.21531	-1.16356	-1.26182	-1.55657	-1.22299	-1.17362	-1.3768	-1.30597
WDHD1	CZC24832	0.654386	0.00301662	Subgroup2	-0.237382	2e-15	0.956153	3.13e-175	-0.512172	1.79e-49	1615	GTPL6653	PI3K/MTOR signaling	PI3Kgamma	42623951	-1.20086	-1.21752	-0.982056	-1.25533	-1.63498	-1.03243	-1.00002	-1.32427	-0.920741	-1.30445	-1.063	-0.978761	-1.0271	-1.21531	-1.16356	-1.26182	-1.55657	-1.22299	-1.17362	-1.3768	-1.30597
WDHD1	BMS-536924	0.546443	0.00784173	Subgroup2	-0.237382	2e-15	0.956153	3.13e-175	-0.512172	1.79e-49	1091	BMS 536924	IGF1R signaling	IGF1R, IR	10390396	-1.20086	-1.21752	-0.982056	-1.25533	-1.63498	-1.03243	-1.00002	-1.32427	-0.920741	-1.30445	-1.063	-0.978761	-1.0271	-1.21531	-1.16356	-1.26182	-1.55657	-1.22299	-1.17362	-1.3768	-1.30597
WDHD1	Alpelisib	0.662055	0.000782707	Subgroup2	-0.237382	2e-15	0.956153	3.13e-175	-0.512172	1.79e-49	1560	BYL719, BYL-719, NVP-BYL719	PI3K/MTOR signaling	PI3Kalpha	56649450	-1.20086	-1.21752	-0.982056	-1.25533	-1.63498	-1.03243	-1.00002	-1.32427	-0.920741	-1.30445	-1.063	-0.978761	-1.0271	-1.21531	-1.16356	-1.26182	-1.55657	-1.22299	-1.17362	-1.3768	-1.30597
WDHD1	ERK_6604	0.687719	0.00154617	Subgroup2	-0.237382	2e-15	0.956153	3.13e-175	-0.512172	1.79e-49	1714	SN1047587618, ERK_6604	ERK MAPK signaling	ERK1,ERK2	-	-1.20086	-1.21752	-0.982056	-1.25533	-1.63498	-1.03243	-1.00002	-1.32427	-0.920741	-1.30445	-1.063	-0.978761	-1.0271	-1.21531	-1.16356	-1.26182	-1.55657	-1.22299	-1.17362	-1.3768	-1.30597
WDHD1	AZD7762	-0.712451	0.000204086	Subgroup2	-0.237382	2e-15	0.956153	3.13e-175	-0.512172	1.79e-49	1022	AZD-7762, AZD 7762	Cell cycle	CHEK1, CHEK2	11152667	-1.20086	-1.21752	-0.982056	-1.25533	-1.63498	-1.03243	-1.00002	-1.32427	-0.920741	-1.30445	-1.063	-0.978761	-1.0271	-1.21531	-1.16356	-1.26182	-1.55657	-1.22299	-1.17362	-1.3768	-1.30597
WEE1	Rapamycin	0.616883	0.00352822	Subgroup2	-0.417409	9.44e-39	0.992298	4.46e-154	-0.288626	1.3e-13	1084	AY-22989, Sirolimus, WY-090217, Torisel, Rapamune	PI3K/MTOR signaling	MTORC1	5384616	-2.11812	-2.15239	-2.30339	-2.2594	-2.69482	-2.20759	-1.826	-2.48748	-1.8955	-2.02807	-2.00916	-2.08815	-2.20387	-2.07163	-2.09126	-2.29012	-1.72202	-2.22656	-1.82949	-2.03531	-1.94021
WEE1	Ibrutinib	-0.647368	0.00343807	Subgroup2	-0.417409	9.44e-39	0.992298	4.46e-154	-0.288626	1.3e-13	1799	PCI-32765, CRA-032765, PCI-32765-00	Other, kinases	BTK	24821094	-2.11812	-2.15239	-2.30339	-2.2594	-2.69482	-2.20759	-1.826	-2.48748	-1.8955	-2.02807	-2.00916	-2.08815	-2.20387	-2.07163	-2.09126	-2.29012	-1.72202	-2.22656	-1.82949	-2.03531	-1.94021
XRCC2	AZD7762	-0.575099	0.0047667	Subgroup2	-0.317549	1.49e-18	1.07405	2.84e-145	-0.503051	2.7e-32	1022	AZD-7762, AZD 7762	Cell cycle	CHEK1, CHEK2	11152667	-0.606963	-0.375029	-0.950672	-0.595629	-0.887369	-0.332536	-0.60613	-0.609829	-0.570902	-0.677105	-0.320497	-0.655283	-0.46883	-0.866467	-0.511306	-0.585201	-0.171253	-0.857288	-0.710777	-0.807791	-0.579371

## Sheet: Subgroup3 Potential Targets
Gene	Drug	Spearman.Correlation.Coefficent	P.value	Group	logFCsub1	adj.P.Valsub1	logFCsub2	adj.P.Valsub2	logFCsub3	adj.P.Valsub3	drug_id	synonyms	pathway_name	targets	pubchem	Mean_CERES	ACH.000078	ACH.000099	ACH.000120	ACH.000227	ACH.000259	ACH.000260	ACH.000310	ACH.000312	ACH.000341	ACH.000366	ACH.000804	ACH.001300	ACH.001301	ACH.001302	ACH.001303	ACH.001344	ACH.001354	ACH.001366	ACH.001548	ACH.001674
CNN2	Temozolomide	-0.594862	0.003299	Subgroup3	-0.71344	1.75e-68	-0.351192	9e-11	1.32507	3.15e-192	1375	Temodar, Temodal, M-39831, SCH 52365	DNA replication	DNA alkylating agent	5394	-0.682452	-0.694357	-0.653178	-0.752254	-0.847711	-0.606192	-0.700907	-1.00379	-0.579038	-0.854243	-0.711152	-0.782267	-0.729101	-0.583131	-0.787246	-0.4477	-0.23258	-0.745061	-0.513218	-0.588672	-0.837251
ELL	XAV939	-0.687719	0.00154617	Subgroup3	-0.524112	8.01e-132	0.0786189	0.00992617	0.674444	1.75e-159	1268	NVP-XAV939, XAV-939, XAV 939	WNT signaling	TNKS1, TNKS2	2726824	-1.32212	-1.45475	-1.23217	-1.29312	-1.5515	-1.23111	-1.33736	-1.32981	-1.37358	-1.47995	-1.59604	-1.27031	-1.0882	-1.40717	-1.48152	-1.09383	-0.871841	-1.31148	-1.40121	-1.28767	-1.34977
HAMP	AMG-319	-0.632411	0.00153682	Subgroup3	-0.70252	1.05e-55	0.214103	0.000346183	0.807456	7.7e-52	2045	AMG319	PI3K/MTOR signaling	PI3K (beta sparing)	68947304	-0.854277	-1.00272	-0.822925	-0.743686	-0.941279	-1.01283	-0.708658	-1.15509	-0.576022	-1.00672	-1.03065	-1.19318	-0.8278	-0.613507	-1.26908	-0.792028	0.354038	-1.22417	-0.795707	-0.813756	-0.909772
HAMP	AZD5991	0.615789	0.00597476	Subgroup3	-0.70252	1.05e-55	0.214103	0.000346183	0.807456	7.7e-52	1720	SN1049446612, AZD5991	Apoptosis regulation	MCL1	-	-0.854277	-1.00272	-0.822925	-0.743686	-0.941279	-1.01283	-0.708658	-1.15509	-0.576022	-1.00672	-1.03065	-1.19318	-0.8278	-0.613507	-1.26908	-0.792028	0.354038	-1.22417	-0.795707	-0.813756	-0.909772
HAMP	Ruxolitinib	-0.598246	0.00794093	Subgroup3	-0.70252	1.05e-55	0.214103	0.000346183	0.807456	7.7e-52	1507	INCB-18424, Ruxolitinib Phosphate, Jakafi	Other, kinases	JAK1, JAK2	25126798	-0.854277	-1.00272	-0.822925	-0.743686	-0.941279	-1.01283	-0.708658	-1.15509	-0.576022	-1.00672	-1.03065	-1.19318	-0.8278	-0.613507	-1.26908	-0.792028	0.354038	-1.22417	-0.795707	-0.813756	-0.909772
IFITM2	Wee1 Inhibitor	0.66502	0.000728653	Subgroup3	-0.83582	2.5e-75	-0.564718	4.82e-21	1.68851	1.14e-272	1046	681640, Wee1 Inhibitor	Cell cycle	WEE1, CHEK1	10384072	-0.795193	-0.977842	-0.771752	-0.701931	-0.958973	-0.734255	-0.63408	-0.833295	-0.734287	-0.89088	-0.930958	-0.647675	-0.775243	-0.720971	-0.875459	-1.21037	-1.15083	-0.510613	-0.65866	-0.46374	-0.72204
IFITM2	BPD-00008900	-0.537549	0.00907981	Subgroup3	-0.83582	2.5e-75	-0.564718	4.82e-21	1.68851	1.14e-272	1998	-	Other	-	-	-0.795193	-0.977842	-0.771752	-0.701931	-0.958973	-0.734255	-0.63408	-0.833295	-0.734287	-0.89088	-0.930958	-0.647675	-0.775243	-0.720971	-0.875459	-1.21037	-1.15083	-0.510613	-0.65866	-0.46374	-0.72204
IFITM2	Dasatinib	-0.591897	0.00349107	Subgroup3	-0.83582	2.5e-75	-0.564718	4.82e-21	1.68851	1.14e-272	1079	BMS-354825-03, BMS-354825, Sprycel	Other, kinases	ABL, SRC, Ephrins, PDGFR, KIT	3062316	-0.795193	-0.977842	-0.771752	-0.701931	-0.958973	-0.734255	-0.63408	-0.833295	-0.734287	-0.89088	-0.930958	-0.647675	-0.775243	-0.720971	-0.875459	-1.21037	-1.15083	-0.510613	-0.65866	-0.46374	-0.72204
IFITM3	AZD1208	0.738596	0.000455042	Subgroup3	-0.819039	6.77e-68	-0.5326	7.68e-18	1.63615	1.16e-230	1449	SN1028350371	Other, kinases	PIM1, PIM2, PIM3	-	-0.922628	-0.86338	-0.984576	-1.05677	-1.17738	-0.73834	-0.770094	-0.72773	-0.595633	-0.951942	-1.03962	-0.722904	-0.887811	-0.751671	-1.19172	-1.01943	-1.32016	-1.04533	-0.830021	-1.03553	-0.742526
OLFML3	BMS-345541	0.67193	0.00214416	Subgroup3	-0.656919	1.06e-52	-0.357593	2.53e-10	1.25049	9.48e-150	1249	-	Other	IKK-1, IKK-2	9926054	-0.650321	-0.580926	-0.601062	-0.408152	-0.675755	-0.759511	-0.554501	-0.687446	-0.491283	-0.682255	-0.641123	-0.584882	-0.658665	-0.592613	-0.950847	-0.528607	-0.865688	-0.902168	-0.70369	-0.542909	-0.594328
OLFML3	PLX-4720	-0.61166	0.00237045	Subgroup3	-0.656919	1.06e-52	-0.357593	2.53e-10	1.25049	9.48e-150	1036	PLX4720, PLX 4720	ERK MAPK signaling	BRAF	24180719	-0.650321	-0.580926	-0.601062	-0.408152	-0.675755	-0.759511	-0.554501	-0.687446	-0.491283	-0.682255	-0.641123	-0.584882	-0.658665	-0.592613	-0.950847	-0.528607	-0.865688	-0.902168	-0.70369	-0.542909	-0.594328
OLFML3	Luminespib	-0.575099	0.0047667	Subgroup3	-0.656919	1.06e-52	-0.357593	2.53e-10	1.25049	9.48e-150	1559	AUY922, VER-52296,NVP-AUY922, AUY	Protein stability and degradation	HSP90	10096043	-0.650321	-0.580926	-0.601062	-0.408152	-0.675755	-0.759511	-0.554501	-0.687446	-0.491283	-0.682255	-0.641123	-0.584882	-0.658665	-0.592613	-0.950847	-0.528607	-0.865688	-0.902168	-0.70369	-0.542909	-0.594328
OLFML3	AZD5363	-0.538538	0.00893468	Subgroup3	-0.656919	1.06e-52	-0.357593	2.53e-10	1.25049	9.48e-150	1916	-	Other, kinases	AKT1, AKT2, AKT3, ROCK2	25227436, 42602260	-0.650321	-0.580926	-0.601062	-0.408152	-0.675755	-0.759511	-0.554501	-0.687446	-0.491283	-0.682255	-0.641123	-0.584882	-0.658665	-0.592613	-0.950847	-0.528607	-0.865688	-0.902168	-0.70369	-0.542909	-0.594328
OLFML3	Afuresertib	-0.593874	0.00336201	Subgroup3	-0.656919	1.06e-52	-0.357593	2.53e-10	1.25049	9.48e-150	1912	GSK2110183, GSK2110183C	PI3K/MTOR signaling	AKT1, AKT2, AKT3	46843057	-0.650321	-0.580926	-0.601062	-0.408152	-0.675755	-0.759511	-0.554501	-0.687446	-0.491283	-0.682255	-0.641123	-0.584882	-0.658665	-0.592613	-0.950847	-0.528607	-0.865688	-0.902168	-0.70369	-0.542909	-0.594328
PSME1	Daporinad	0.842424	0.00445903	Subgroup3	-0.502697	1.5e-101	0.0522505	0.116206	0.667455	5.69e-131	1248	APO866, FK866, FK866	Metabolism	NAMPT	6914657	-0.717638	-0.572062	-0.492611	-0.708638	-1.0295	-0.731902	-0.608059	-0.999024	-0.619257	-1.01107	-0.649519	-0.693889	-0.578396	-0.770433	-0.417604	-0.712663	-0.68298	-0.623096	-0.728095	-1.02059	-0.703372
PSME1	Pevonedistat	0.743083	7.56e-05	Subgroup3	-0.502697	1.5e-101	0.0522505	0.116206	0.667455	5.69e-131	1529	MLN4924, MLN 4924, MLN-4924	Other	NAE	16720766	-0.717638	-0.572062	-0.492611	-0.708638	-1.0295	-0.731902	-0.608059	-0.999024	-0.619257	-1.01107	-0.649519	-0.693889	-0.578396	-0.770433	-0.417604	-0.712663	-0.68298	-0.623096	-0.728095	-1.02059	-0.703372
PSME1	Nelarabine	-0.677193	0.00192701	Subgroup3	-0.502697	1.5e-101	0.0522505	0.116206	0.667455	5.69e-131	1814	Atriance, Arranon	DNA replication	-	-	-0.717638	-0.572062	-0.492611	-0.708638	-1.0295	-0.731902	-0.608059	-0.999024	-0.619257	-1.01107	-0.649519	-0.693889	-0.578396	-0.770433	-0.417604	-0.712663	-0.68298	-0.623096	-0.728095	-1.02059	-0.703372
PSME1	Sapitinib	-0.626482	0.00174464	Subgroup3	-0.502697	1.5e-101	0.0522505	0.116206	0.667455	5.69e-131	1549	AZD8931	EGFR signaling	EGFR, ERBB2, ERBB3	11488320	-0.717638	-0.572062	-0.492611	-0.708638	-1.0295	-0.731902	-0.608059	-0.999024	-0.619257	-1.01107	-0.649519	-0.693889	-0.578396	-0.770433	-0.417604	-0.712663	-0.68298	-0.623096	-0.728095	-1.02059	-0.703372
PSME1	Dasatinib	-0.617589	0.00210059	Subgroup3	-0.502697	1.5e-101	0.0522505	0.116206	0.667455	5.69e-131	1079	BMS-354825-03, BMS-354825, Sprycel	Other, kinases	ABL, SRC, Ephrins, PDGFR, KIT	3062316	-0.717638	-0.572062	-0.492611	-0.708638	-1.0295	-0.731902	-0.608059	-0.999024	-0.619257	-1.01107	-0.649519	-0.693889	-0.578396	-0.770433	-0.417604	-0.712663	-0.68298	-0.623096	-0.728095	-1.02059	-0.703372
REXO2	AZD6738	0.545455	0.00797191	Subgroup3	-0.277642	4.13e-27	-0.34607	3.2e-26	0.701656	6.68e-134	1917	AZD 6738, AZD-6738	Genome integrity	ATR	54761306	-0.626749	-0.452453	-0.787693	-0.553246	-0.700778	-1.2304	-0.485778	-0.524843	-0.665697	-0.410361	-0.485823	-1.36469	-0.67022	-0.430026	-0.493179	-0.35124	-0.394748	-0.730535	-0.564316	-0.365024	-0.873924
REXO2	P22077	0.550395	0.0073386	Subgroup3	-0.277642	4.13e-27	-0.34607	3.2e-26	0.701656	6.68e-134	1933	P 22077, P-22077	Protein stability and degradation	USP7, USP47	46931953	-0.626749	-0.452453	-0.787693	-0.553246	-0.700778	-1.2304	-0.485778	-0.524843	-0.665697	-0.410361	-0.485823	-1.36469	-0.67022	-0.430026	-0.493179	-0.35124	-0.394748	-0.730535	-0.564316	-0.365024	-0.873924
STAT5A	Alisertib	-0.594737	0.00839121	Subgroup3	-0.503631	1.28e-71	-0.201878	8.2e-08	0.894501	6.75e-181	1051	MLN8237	Mitosis	AURKA	24771867	-0.739286	-0.672354	-0.78969	-0.534009	-0.841219	-0.814071	-0.44798	-1.03344	-0.643601	-0.835441	-0.587786	-0.922957	-0.830673	-0.712514	-0.792816	-0.48883	-0.553413	-0.90505	-0.884838	-0.844258	-0.650781
STAT5A	Teniposide	-0.652632	0.0031178	Subgroup3	-0.503631	1.28e-71	-0.201878	8.2e-08	0.894501	6.75e-181	1809	Vumon	DNA replication	-	-	-0.739286	-0.672354	-0.78969	-0.534009	-0.841219	-0.814071	-0.44798	-1.03344	-0.643601	-0.835441	-0.587786	-0.922957	-0.830673	-0.712514	-0.792816	-0.48883	-0.553413	-0.90505	-0.884838	-0.844258	-0.650781
STAT5A	Vincristine	-0.594737	0.00839121	Subgroup3	-0.503631	1.28e-71	-0.201878	8.2e-08	0.894501	6.75e-181	1818	-	Mitosis	-	-	-0.739286	-0.672354	-0.78969	-0.534009	-0.841219	-0.814071	-0.44798	-1.03344	-0.643601	-0.835441	-0.587786	-0.922957	-0.830673	-0.712514	-0.792816	-0.48883	-0.553413	-0.90505	-0.884838	-0.844258	-0.650781
STAT5A	Topotecan	-0.591228	0.00886209	Subgroup3	-0.503631	1.28e-71	-0.201878	8.2e-08	0.894501	6.75e-181	1808	-	DNA replication	-	-	-0.739286	-0.672354	-0.78969	-0.534009	-0.841219	-0.814071	-0.44798	-1.03344	-0.643601	-0.835441	-0.587786	-0.922957	-0.830673	-0.712514	-0.792816	-0.48883	-0.553413	-0.90505	-0.884838	-0.844258	-0.650781
STAT5A	Irinotecan	-0.554348	0.00686275	Subgroup3	-0.503631	1.28e-71	-0.201878	8.2e-08	0.894501	6.75e-181	1088	Camptosar, (+)-Irinotecan, Irinotecanum, irinotecan hydrochloride	DNA replication	TOP1	60838	-0.739286	-0.672354	-0.78969	-0.534009	-0.841219	-0.814071	-0.44798	-1.03344	-0.643601	-0.835441	-0.587786	-0.922957	-0.830673	-0.712514	-0.792816	-0.48883	-0.553413	-0.90505	-0.884838	-0.844258	-0.650781
STAT5A	LCL161	0.605263	0.00709942	Subgroup3	-0.503631	1.28e-71	-0.201878	8.2e-08	0.894501	6.75e-181	1557	-	Apoptosis regulation	XIAP, IAP1, IAP2	24737642	-0.739286	-0.672354	-0.78969	-0.534009	-0.841219	-0.814071	-0.44798	-1.03344	-0.643601	-0.835441	-0.587786	-0.922957	-0.830673	-0.712514	-0.792816	-0.48883	-0.553413	-0.90505	-0.884838	-0.844258	-0.650781
TLN1	AZD6738	0.618577	0.00205824	Subgroup3	-0.390915	7.54e-60	-0.185037	5.48e-09	0.719479	4.92e-160	1917	AZD 6738, AZD-6738	Genome integrity	ATR	54761306	-0.788706	-0.825396	-0.845109	-0.942076	-0.86821	-0.725596	-0.736601	-0.92697	-0.656117	-0.49425	-0.597221	-0.886423	-0.952947	-0.751787	-0.653653	-0.813346	-1.79424	-0.690998	-0.691487	-0.329287	-0.59241
TLN1	AZD7762	0.54249	0.00837334	Subgroup3	-0.390915	7.54e-60	-0.185037	5.48e-09	0.719479	4.92e-160	1022	AZD-7762, AZD 7762	Cell cycle	CHEK1, CHEK2	11152667	-0.788706	-0.825396	-0.845109	-0.942076	-0.86821	-0.725596	-0.736601	-0.92697	-0.656117	-0.49425	-0.597221	-0.886423	-0.952947	-0.751787	-0.653653	-0.813346	-1.79424	-0.690998	-0.691487	-0.329287	-0.59241
TLN1	Sapitinib	-0.582016	0.00420078	Subgroup3	-0.390915	7.54e-60	-0.185037	5.48e-09	0.719479	4.92e-160	1549	AZD8931	EGFR signaling	EGFR, ERBB2, ERBB3	11488320	-0.788706	-0.825396	-0.845109	-0.942076	-0.86821	-0.725596	-0.736601	-0.92697	-0.656117	-0.49425	-0.597221	-0.886423	-0.952947	-0.751787	-0.653653	-0.813346	-1.79424	-0.690998	-0.691487	-0.329287	-0.59241
TLN1	Cisplatin	0.546443	0.00784173	Subgroup3	-0.390915	7.54e-60	-0.185037	5.48e-09	0.719479	4.92e-160	1005	cis-Diammineplatinum(II) dichloride, Platinol, CIS-DDP	DNA replication	DNA crosslinker	84691	-0.788706	-0.825396	-0.845109	-0.942076	-0.86821	-0.725596	-0.736601	-0.92697	-0.656117	-0.49425	-0.597221	-0.886423	-0.952947	-0.751787	-0.653653	-0.813346	-1.79424	-0.690998	-0.691487	-0.329287	-0.59241
TLN1	Pevonedistat	0.548419	0.00758668	Subgroup3	-0.390915	7.54e-60	-0.185037	5.48e-09	0.719479	4.92e-160	1529	MLN4924, MLN 4924, MLN-4924	Other	NAE	16720766	-0.788706	-0.825396	-0.845109	-0.942076	-0.86821	-0.725596	-0.736601	-0.92697	-0.656117	-0.49425	-0.597221	-0.886423	-0.952947	-0.751787	-0.653653	-0.813346	-1.79424	-0.690998	-0.691487	-0.329287	-0.59241
TLN1	Paclitaxel	0.55336	0.00697922	Subgroup3	-0.390915	7.54e-60	-0.185037	5.48e-09	0.719479	4.92e-160	1080	BMS-181339-01, Taxol, Onxol, Paxene, Praxel, Abraxane	Mitosis	Microtubule stabiliser	36314	-0.788706	-0.825396	-0.845109	-0.942076	-0.86821	-0.725596	-0.736601	-0.92697	-0.656117	-0.49425	-0.597221	-0.886423	-0.952947	-0.751787	-0.653653	-0.813346	-1.79424	-0.690998	-0.691487	-0.329287	-0.59241
TLN1	ERK_2440	-0.652632	0.0031178	Subgroup3	-0.390915	7.54e-60	-0.185037	5.48e-09	0.719479	4.92e-160	1713	SN1051032892, ERK_2440	ERK MAPK signaling	ERK1,ERK2	-	-0.788706	-0.825396	-0.845109	-0.942076	-0.86821	-0.725596	-0.736601	-0.92697	-0.656117	-0.49425	-0.597221	-0.886423	-0.952947	-0.751787	-0.653653	-0.813346	-1.79424	-0.690998	-0.691487	-0.329287	-0.59241
